# Supplementary material
Source: publisher site journal article supplement (https://www.dovepress.com/article/436431)
Supplement: Supplementary file 1 [file TableS1-S7.pdf › TableS1-S7.pdf]

**Table S1. Primers used in the experiments.**

| Gene name |          | Primer sequence             | Application |
|-----------|----------|-----------------------------|-------------|
| IL11      | F        | 5'-GCGCTGTTCTCCTAACCCG-3'   | qRT-PCR     |
|           | R        | 5'-GAGTCCAGACTGTGATCTCCG-3' |             |
| GAPDH     | F        | 5'-CAGGAGGCATTGCTGATGAT-3'  | qRT-PCR     |
|           | R        | 5'-GAAGGCTGGGGCTCATTT-3'    |             |
| sh-IL11#1 | sequence | 5'-CAGAGGAGCAGACCGCAAAG-3'  | sh-RNA      |
| sh-IL11#2 | sequence | 5'-TGACGCTGAGGGACAAATT-3'   | sh-RNA      |
| sh-IL11#3 | sequence | 5'-TGAGCCTGGCCAGATACAG-3'   | sh-RNA      |

Abbreviations: F: Forward; R: Reverse; qRT-PCR: quantitative real-time PCR; sh-RNA: short hairpin RNA;

Table\_S2. GO terms and KEGG pathways

| ONTOLOGY | ID         | GeneRatio | BgRatio   | pvalue   | p.adjust | qvalue   | Count |
|----------|------------|-----------|-----------|----------|----------|----------|-------|
| BP       | GO:0006959 | 143/655   | 380/18862 | 2.1E-111 | 1E-107   | 6.5E-108 | 143   |
| BP       | GO:0006956 | 106/655   | 178/18862 | 3.6E-109 | 8.4E-106 | 5.6E-106 | 106   |
| BP       | GO:0006958 | 95/655    | 141/18862 | 1.9E-105 | 2.9E-102 | 1.9E-102 | 95    |
| BP       | GO:0002455 | 96/655    | 156/18862 | 1E-100   | 1.17E-97 | 7.7E-98  | 96    |
| BP       | GO:0019724 | 108/655   | 226/18862 | 4.15E-97 | 3.87E-94 | 2.55E-94 | 108   |
| BP       | GO:0016064 | 107/655   | 223/18862 | 1.96E-96 | 1.52E-93 | 1.00E-93 | 107   |
| BP       | GO:0002460 | 129/655   | 367/18862 | 1.27E-95 | 8.47E-93 | 5.57E-93 | 129   |
| BP       | GO:0002449 | 121/655   | 360/18862 | 8.24E-87 | 4.81E-84 | 3.16E-84 | 121   |
| BP       | GO:0006909 | 122/655   | 381/18862 | 1.13E-84 | 5.88E-82 | 3.86E-82 | 122   |
| BP       | GO:0002377 | 90/655    | 198/18862 | 3.53E-78 | 1.65E-75 | 1.08E-75 | 90    |
| BP       | GO:0030449 | 72/655    | 115/18862 | 3.49E-76 | 1.48E-73 | 9.74E-74 | 72    |
| BP       | GO:0002440 | 101/655   | 286/18862 | 1.39E-74 | 5.41E-72 | 3.56E-72 | 101   |
| BP       | GO:0002920 | 75/655    | 138/18862 | 9.99E-73 | 3.58E-70 | 2.36E-70 | 75    |
| BP       | GO:0002697 | 114/655   | 465/18862 | 7.70E-65 | 2.57E-62 | 1.69E-62 | 114   |
| BP       | GO:0006910 | 61/655    | 98/18862  | 2.46E-64 | 7.66E-62 | 5.04E-62 | 61    |
| BP       | GO:0002429 | 115/655   | 481/18862 | 3.81E-64 | 1.04E-61 | 6.87E-62 | 115   |
| BP       | GO:0002757 | 115/655   | 481/18862 | 3.81E-64 | 1.04E-61 | 6.87E-62 | 115   |
| BP       | GO:0042742 | 99/655    | 344/18862 | 2.49E-63 | 6.46E-61 | 4.25E-61 | 99    |
| BP       | GO:0002696 | 105/655   | 401/18862 | 1.09E-62 | 2.67E-60 | 1.76E-60 | 105   |
| BP       | GO:0050867 | 106/655   | 412/18862 | 1.85E-62 | 4.32E-60 | 2.84E-60 | 106   |
| BP       | GO:0002431 | 65/655    | 145/18862 | 6.39E-56 | 1.42E-53 | 9.33E-54 | 65    |
| BP       | GO:0038094 | 64/655    | 140/18862 | 9.48E-56 | 2.01E-53 | 1.32E-53 | 64    |
| BP       | GO:0050871 | 65/655    | 150/18862 | 9.84E-55 | 2.00E-52 | 1.31E-52 | 65    |
| BP       | GO:0002433 | 63/655    | 139/18862 | 1.37E-54 | 2.56E-52 | 1.68E-52 | 63    |
| BP       | GO:0038096 | 63/655    | 139/18862 | 1.37E-54 | 2.56E-52 | 1.68E-52 | 63    |
| BP       | GO:0006898 | 89/655    | 328/18862 | 1.97E-54 | 3.53E-52 | 2.32E-52 | 89    |
| BP       | GO:0051251 | 92/655    | 356/18862 | 2.98E-54 | 5.14E-52 | 3.38E-52 | 92    |
| BP       | GO:0050864 | 71/655    | 193/18862 | 9.80E-54 | 1.63E-51 | 1.07E-51 | 71    |
| BP       | GO:0006911 | 59/655    | 126/18862 | 3.29E-52 | 5.28E-50 | 3.48E-50 | 59    |
| BP       | GO:0050853 | 59/655    | 134/18862 | 3.15E-50 | 4.89E-48 | 3.22E-48 | 59    |
| BP       | GO:0099024 | 59/655    | 135/18862 | 5.42E-50 | 8.15E-48 | 5.36E-48 | 59    |
| BP       | GO:0010324 | 59/655    | 143/18862 | 3.42E-48 | 4.99E-46 | 3.28E-46 | 59    |
| BP       | GO:0038095 | 60/655    | 169/18862 | 2.09E-44 | 2.95E-42 | 1.94E-42 | 60    |
| BP       | GO:0042113 | 79/655    | 326/18862 | 2.80E-44 | 3.84E-42 | 2.52E-42 | 79    |
| BP       | GO:0038093 | 69/655    | 239/18862 | 3.69E-44 | 4.92E-42 | 3.24E-42 | 69    |
| BP       | GO:0008037 | 68/655    | 232/18862 | 5.30E-44 | 6.87E-42 | 4.52E-42 | 68    |
| BP       | GO:0060326 | 71/655    | 306/18862 | 1.83E-38 | 2.30E-36 | 1.51E-36 | 71    |
| BP       | GO:0097529 | 55/655    | 218/18862 | 5.83E-32 | 7.16E-30 | 4.71E-30 | 55    |
| BP       | GO:0030595 | 55/655    | 226/18862 | 4.38E-31 | 5.23E-29 | 3.44E-29 | 55    |
| BP       | GO:0050851 | 64/655    | 323/18862 | 1.93E-30 | 2.25E-28 | 1.48E-28 | 64    |
| BP       | GO:0050920 | 52/655    | 224/18862 | 2.28E-28 | 2.59E-26 | 1.71E-26 | 52    |
| BP       | GO:0001819 | 68/655    | 437/18862 | 9.27E-26 | 1.03E-23 | 6.77E-24 | 68    |
| BP       | GO:1990868 | 34/655    | 97/18862  | 2.19E-25 | 2.32E-23 | 1.53E-23 | 34    |
| BP       | GO:1990869 | 34/655    | 97/18862  | 2.19E-25 | 2.32E-23 | 1.53E-23 | 34    |
| BP       | GO:0071621 | 37/655    | 124/18862 | 1.14E-24 | 1.18E-22 | 7.75E-23 | 37    |
| BP       | GO:0070098 | 32/655    | 88/18862  | 1.52E-24 | 1.54E-22 | 1.01E-22 | 32    |

|    |            |        |           |          |          |          |    |
|----|------------|--------|-----------|----------|----------|----------|----|
| BP | GO:0030593 | 34/655 | 103/18862 | 2.15E-24 | 2.13E-22 | 1.40E-22 | 34 |
| BP | GO:0097530 | 39/655 | 148/18862 | 1.01E-23 | 9.77E-22 | 6.42E-22 | 39 |
| BP | GO:0032496 | 56/655 | 326/18862 | 1.66E-23 | 1.58E-21 | 1.04E-21 | 56 |
| BP | GO:1990266 | 35/655 | 123/18862 | 1.24E-22 | 1.15E-20 | 7.58E-21 | 35 |
| BP | GO:0002237 | 56/655 | 346/18862 | 3.34E-22 | 3.05E-20 | 2.01E-20 | 56 |
| BP | GO:0050727 | 57/655 | 366/18862 | 9.69E-22 | 8.70E-20 | 5.72E-20 | 57 |
| BP | GO:0031349 | 56/655 | 361/18862 | 2.73E-21 | 2.40E-19 | 1.58E-19 | 56 |
| BP | GO:0050921 | 35/655 | 139/18862 | 1.05E-20 | 9.03E-19 | 5.94E-19 | 35 |
| BP | GO:0070374 | 41/655 | 210/18862 | 1.31E-19 | 1.11E-17 | 7.33E-18 | 41 |
| BP | GO:0071674 | 39/655 | 190/18862 | 1.62E-19 | 1.35E-17 | 8.89E-18 | 39 |
| BP | GO:0032102 | 56/655 | 394/18862 | 1.88E-19 | 1.54E-17 | 1.01E-17 | 56 |
| BP | GO:0070371 | 50/655 | 320/18862 | 2.95E-19 | 2.37E-17 | 1.56E-17 | 50 |
| BP | GO:0002685 | 40/655 | 205/18862 | 3.78E-19 | 2.99E-17 | 1.96E-17 | 40 |
| BP | GO:0019730 | 33/655 | 142/18862 | 1.93E-18 | 1.50E-16 | 9.87E-17 | 33 |
| BP | GO:0002548 | 24/655 | 68/18862  | 2.24E-18 | 1.71E-16 | 1.12E-16 | 24 |
| BP | GO:0070372 | 47/655 | 301/18862 | 3.72E-18 | 2.80E-16 | 1.84E-16 | 47 |
| BP | GO:0050673 | 56/655 | 428/18862 | 9.10E-18 | 6.73E-16 | 4.43E-16 | 56 |
| BP | GO:0001935 | 37/655 | 191/18862 | 1.07E-17 | 7.82E-16 | 5.14E-16 | 37 |
| BP | GO:0007204 | 47/655 | 310/18862 | 1.25E-17 | 8.95E-16 | 5.89E-16 | 47 |
| BP | GO:0055074 | 57/655 | 454/18862 | 3.12E-17 | 2.21E-15 | 1.45E-15 | 57 |
| BP | GO:0001936 | 35/655 | 177/18862 | 4.21E-17 | 2.93E-15 | 1.93E-15 | 35 |
| BP | GO:0002688 | 29/655 | 119/18862 | 5.83E-17 | 4.00E-15 | 2.63E-15 | 29 |
| BP | GO:0051480 | 48/655 | 344/18862 | 1.68E-16 | 1.13E-14 | 7.41E-15 | 48 |
| BP | GO:0050729 | 30/655 | 133/18862 | 1.69E-16 | 1.13E-14 | 7.41E-15 | 30 |
| BP | GO:0002683 | 52/655 | 403/18862 | 2.58E-16 | 1.69E-14 | 1.11E-14 | 52 |
| BP | GO:0001938 | 27/655 | 108/18862 | 3.48E-16 | 2.26E-14 | 1.48E-14 | 27 |
| BP | GO:0050679 | 36/655 | 203/18862 | 5.68E-16 | 3.61E-14 | 2.38E-14 | 36 |
| BP | GO:0072507 | 58/655 | 499/18862 | 5.73E-16 | 3.61E-14 | 2.38E-14 | 58 |
| BP | GO:0006874 | 54/655 | 442/18862 | 7.28E-16 | 4.53E-14 | 2.98E-14 | 54 |
| BP | GO:0007188 | 38/655 | 230/18862 | 9.84E-16 | 6.04E-14 | 3.97E-14 | 38 |
| BP | GO:0050678 | 49/655 | 374/18862 | 1.05E-15 | 6.37E-14 | 4.19E-14 | 49 |
| BP | GO:0002687 | 29/655 | 133/18862 | 1.42E-15 | 8.49E-14 | 5.58E-14 | 29 |
| BP | GO:0018108 | 48/655 | 369/18862 | 2.77E-15 | 1.63E-13 | 1.07E-13 | 48 |
| BP | GO:0018212 | 48/655 | 372/18862 | 3.80E-15 | 2.22E-13 | 1.46E-13 | 48 |
| BP | GO:0050918 | 21/655 | 67/18862  | 4.78E-15 | 2.75E-13 | 1.81E-13 | 21 |
| BP | GO:0072503 | 55/655 | 480/18862 | 6.27E-15 | 3.57E-13 | 2.35E-13 | 55 |
| BP | GO:0071222 | 34/655 | 197/18862 | 8.62E-15 | 4.84E-13 | 3.19E-13 | 34 |
| BP | GO:0002690 | 23/655 | 91/18862  | 4.27E-14 | 2.37E-12 | 1.56E-12 | 23 |
| BP | GO:0071216 | 36/655 | 233/18862 | 4.78E-14 | 2.62E-12 | 1.72E-12 | 36 |
| BP | GO:0070661 | 42/655 | 312/18862 | 4.87E-14 | 2.64E-12 | 1.74E-12 | 42 |
| BP | GO:0071219 | 34/655 | 209/18862 | 5.23E-14 | 2.80E-12 | 1.84E-12 | 34 |
| BP | GO:0045785 | 49/655 | 425/18862 | 1.59E-13 | 8.43E-12 | 5.54E-12 | 49 |
| BP | GO:0001818 | 45/655 | 367/18862 | 1.82E-13 | 9.52E-12 | 6.26E-12 | 45 |
| BP | GO:0050922 | 19/655 | 64/18862  | 2.92E-13 | 1.52E-11 | 9.97E-12 | 19 |
| BP | GO:0034341 | 32/655 | 197/18862 | 3.05E-13 | 1.56E-11 | 1.03E-11 | 32 |
| BP | GO:0051897 | 30/655 | 175/18862 | 3.99E-13 | 2.02E-11 | 1.33E-11 | 30 |
| BP | GO:0048846 | 15/655 | 37/18862  | 5.07E-13 | 2.51E-11 | 1.65E-11 | 15 |
| BP | GO:1902284 | 15/655 | 37/18862  | 5.07E-13 | 2.51E-11 | 1.65E-11 | 15 |
| BP | GO:0008217 | 30/655 | 177/18862 | 5.42E-13 | 2.66E-11 | 1.75E-11 | 30 |

|    |            |        |           |          |          |          |    |
|----|------------|--------|-----------|----------|----------|----------|----|
| BP | GO:0042116 | 23/655 | 102/18862 | 5.88E-13 | 2.86E-11 | 1.88E-11 | 23 |
| BP | GO:0007159 | 44/655 | 366/18862 | 6.79E-13 | 3.26E-11 | 2.14E-11 | 44 |
| BP | GO:0001667 | 51/655 | 473/18862 | 6.85E-13 | 3.26E-11 | 2.14E-11 | 51 |
| BP | GO:0051047 | 39/655 | 295/18862 | 7.16E-13 | 3.37E-11 | 2.22E-11 | 39 |
| BP | GO:0048841 | 14/655 | 32/18862  | 8.55E-13 | 3.99E-11 | 2.62E-11 | 14 |
| BP | GO:0090066 | 52/655 | 493/18862 | 9.52E-13 | 4.40E-11 | 2.89E-11 | 52 |
| BP | GO:0050731 | 31/655 | 193/18862 | 9.78E-13 | 4.47E-11 | 2.94E-11 | 31 |
| BP | GO:0050919 | 16/655 | 46/18862  | 1.40E-12 | 6.35E-11 | 4.18E-11 | 16 |
| BP | GO:1903037 | 41/655 | 330/18862 | 1.44E-12 | 6.42E-11 | 4.22E-11 | 41 |
| BP | GO:0048660 | 28/655 | 160/18862 | 1.44E-12 | 6.42E-11 | 4.22E-11 | 28 |
| BP | GO:0002831 | 47/655 | 420/18862 | 1.50E-12 | 6.61E-11 | 4.35E-11 | 47 |
| BP | GO:0033002 | 33/655 | 222/18862 | 1.67E-12 | 7.26E-11 | 4.78E-11 | 33 |
| BP | GO:0048659 | 28/655 | 162/18862 | 1.98E-12 | 8.55E-11 | 5.62E-11 | 28 |
| BP | GO:0034612 | 40/655 | 320/18862 | 2.24E-12 | 9.58E-11 | 6.30E-11 | 40 |
| BP | GO:1902105 | 37/655 | 279/18862 | 2.56E-12 | 1.09E-10 | 7.14E-11 | 37 |
| BP | GO:0048247 | 18/655 | 64/18862  | 3.47E-12 | 1.46E-10 | 9.58E-11 | 18 |
| BP | GO:0071356 | 38/655 | 296/18862 | 3.54E-12 | 1.47E-10 | 9.69E-11 | 38 |
| BP | GO:1903706 | 46/655 | 415/18862 | 3.67E-12 | 1.51E-10 | 9.95E-11 | 46 |
| BP | GO:1903532 | 36/655 | 271/18862 | 4.83E-12 | 1.98E-10 | 1.30E-10 | 36 |
| BP | GO:1903039 | 33/655 | 234/18862 | 7.32E-12 | 2.97E-10 | 1.95E-10 | 33 |
| BP | GO:0001659 | 28/655 | 171/18862 | 7.70E-12 | 3.10E-10 | 2.04E-10 | 28 |
| BP | GO:0050730 | 35/655 | 262/18862 | 8.18E-12 | 3.26E-10 | 2.14E-10 | 35 |
| BP | GO:0048638 | 39/655 | 319/18862 | 8.49E-12 | 3.36E-10 | 2.21E-10 | 39 |
| BP | GO:0051091 | 35/655 | 266/18862 | 1.27E-11 | 4.96E-10 | 3.26E-10 | 35 |
| BP | GO:0048640 | 22/655 | 107/18862 | 1.34E-11 | 5.22E-10 | 3.43E-10 | 22 |
| BP | GO:0050886 | 19/655 | 78/18862  | 1.43E-11 | 5.50E-10 | 3.62E-10 | 19 |
| BP | GO:0070663 | 33/655 | 241/18862 | 1.65E-11 | 6.33E-10 | 4.16E-10 | 33 |
| BP | GO:0048843 | 12/655 | 26/18862  | 1.72E-11 | 6.53E-10 | 4.29E-10 | 12 |
| BP | GO:0051896 | 33/655 | 247/18862 | 3.25E-11 | 1.21E-09 | 7.98E-10 | 33 |
| BP | GO:0071526 | 14/655 | 40/18862  | 3.25E-11 | 1.21E-09 | 7.98E-10 | 14 |
| BP | GO:1903131 | 44/655 | 411/18862 | 3.50E-11 | 1.29E-09 | 8.51E-10 | 44 |
| BP | GO:0022409 | 35/655 | 276/18862 | 3.63E-11 | 1.33E-09 | 8.76E-10 | 35 |
| BP | GO:0051092 | 26/655 | 159/18862 | 4.46E-11 | 1.63E-09 | 1.07E-09 | 26 |
| BP | GO:0046651 | 35/655 | 282/18862 | 6.66E-11 | 2.41E-09 | 1.58E-09 | 35 |
| BP | GO:0060284 | 48/655 | 485/18862 | 7.00E-11 | 2.51E-09 | 1.65E-09 | 48 |
| BP | GO:0048771 | 27/655 | 175/18862 | 7.50E-11 | 2.67E-09 | 1.76E-09 | 27 |
| BP | GO:0022407 | 45/655 | 437/18862 | 7.64E-11 | 2.70E-09 | 1.77E-09 | 45 |
| BP | GO:0032147 | 38/655 | 328/18862 | 7.92E-11 | 2.78E-09 | 1.83E-09 | 38 |
| BP | GO:0032943 | 35/655 | 285/18862 | 8.95E-11 | 3.12E-09 | 2.05E-09 | 35 |
| BP | GO:0071346 | 27/655 | 177/18862 | 9.79E-11 | 3.38E-09 | 2.23E-09 | 27 |
| BP | GO:0072676 | 22/655 | 118/18862 | 1.02E-10 | 3.49E-09 | 2.30E-09 | 22 |
| BP | GO:0043406 | 31/655 | 230/18862 | 1.03E-10 | 3.51E-09 | 2.31E-09 | 31 |
| BP | GO:0043491 | 34/655 | 273/18862 | 1.14E-10 | 3.85E-09 | 2.53E-09 | 34 |
| BP | GO:0061844 | 18/655 | 78/18862  | 1.30E-10 | 4.36E-09 | 2.87E-09 | 18 |
| BP | GO:0002699 | 30/655 | 219/18862 | 1.38E-10 | 4.60E-09 | 3.02E-09 | 30 |
| BP | GO:0002822 | 25/655 | 155/18862 | 1.43E-10 | 4.73E-09 | 3.11E-09 | 25 |
| BP | GO:0043405 | 36/655 | 307/18862 | 1.79E-10 | 5.88E-09 | 3.86E-09 | 36 |
| BP | GO:0002446 | 48/655 | 499/18862 | 1.86E-10 | 6.08E-09 | 4.00E-09 | 48 |
| BP | GO:0002819 | 26/655 | 170/18862 | 2.06E-10 | 6.66E-09 | 4.38E-09 | 26 |

|    |            |        |           |          |          |          |    |
|----|------------|--------|-----------|----------|----------|----------|----|
| BP | GO:0032609 | 21/655 | 112/18862 | 2.43E-10 | 7.81E-09 | 5.14E-09 | 21 |
| BP | GO:1901342 | 38/655 | 341/18862 | 2.48E-10 | 7.91E-09 | 5.20E-09 | 38 |
| BP | GO:0003044 | 14/655 | 46/18862  | 2.77E-10 | 8.80E-09 | 5.79E-09 | 14 |
| BP | GO:0050870 | 29/655 | 212/18862 | 2.90E-10 | 9.15E-09 | 6.02E-09 | 29 |
| BP | GO:0009615 | 39/655 | 359/18862 | 3.05E-10 | 9.54E-09 | 6.27E-09 | 39 |
| BP | GO:0042110 | 46/655 | 474/18862 | 3.38E-10 | 1.05E-08 | 6.92E-09 | 46 |
| BP | GO:0045088 | 36/655 | 315/18862 | 3.68E-10 | 1.14E-08 | 7.47E-09 | 36 |
| BP | GO:0032612 | 22/655 | 126/18862 | 3.82E-10 | 1.17E-08 | 7.72E-09 | 22 |
| BP | GO:0045766 | 26/655 | 175/18862 | 3.94E-10 | 1.19E-08 | 7.85E-09 | 26 |
| BP | GO:1904018 | 26/655 | 175/18862 | 3.94E-10 | 1.19E-08 | 7.85E-09 | 26 |
| BP | GO:0061387 | 20/655 | 104/18862 | 4.05E-10 | 1.22E-08 | 8.02E-09 | 20 |
| BP | GO:0002833 | 32/655 | 258/18862 | 4.49E-10 | 1.34E-08 | 8.83E-09 | 32 |
| BP | GO:0060389 | 16/655 | 65/18862  | 4.96E-10 | 1.47E-08 | 9.69E-09 | 16 |
| BP | GO:0051607 | 32/655 | 260/18862 | 5.47E-10 | 1.61E-08 | 1.06E-08 | 32 |
| BP | GO:0140546 | 32/655 | 260/18862 | 5.47E-10 | 1.61E-08 | 1.06E-08 | 32 |
| BP | GO:0045765 | 37/655 | 335/18862 | 5.51E-10 | 1.61E-08 | 1.06E-08 | 37 |
| BP | GO:0042119 | 47/655 | 500/18862 | 6.24E-10 | 1.81E-08 | 1.19E-08 | 47 |
| BP | GO:0032649 | 20/655 | 107/18862 | 6.89E-10 | 1.98E-08 | 1.30E-08 | 20 |
| BP | GO:0043312 | 46/655 | 485/18862 | 7.15E-10 | 2.05E-08 | 1.35E-08 | 46 |
| BP | GO:0043434 | 43/655 | 435/18862 | 7.35E-10 | 2.09E-08 | 1.37E-08 | 43 |
| BP | GO:0050670 | 29/655 | 221/18862 | 7.87E-10 | 2.22E-08 | 1.46E-08 | 29 |
| BP | GO:0002283 | 46/655 | 488/18862 | 8.74E-10 | 2.45E-08 | 1.61E-08 | 46 |
| BP | GO:0010631 | 38/655 | 357/18862 | 9.26E-10 | 2.59E-08 | 1.70E-08 | 38 |
| BP | GO:0032944 | 29/655 | 223/18862 | 9.75E-10 | 2.71E-08 | 1.78E-08 | 29 |
| BP | GO:0071902 | 35/655 | 311/18862 | 9.82E-10 | 2.71E-08 | 1.78E-08 | 35 |
| BP | GO:0072593 | 33/655 | 281/18862 | 9.98E-10 | 2.74E-08 | 1.80E-08 | 33 |
| BP | GO:0050863 | 36/655 | 327/18862 | 1.03E-09 | 2.82E-08 | 1.85E-08 | 36 |
| BP | GO:0090132 | 38/655 | 360/18862 | 1.17E-09 | 3.18E-08 | 2.09E-08 | 38 |
| BP | GO:0040013 | 39/655 | 377/18862 | 1.27E-09 | 3.42E-08 | 2.25E-08 | 39 |
| BP | GO:0051090 | 43/655 | 444/18862 | 1.38E-09 | 3.70E-08 | 2.44E-08 | 43 |
| BP | GO:0008361 | 25/655 | 173/18862 | 1.55E-09 | 4.13E-08 | 2.72E-08 | 25 |
| BP | GO:0003073 | 18/655 | 90/18862  | 1.57E-09 | 4.16E-08 | 2.73E-08 | 18 |
| BP | GO:0001990 | 12/655 | 36/18862  | 1.62E-09 | 4.27E-08 | 2.81E-08 | 12 |
| BP | GO:0090130 | 38/655 | 365/18862 | 1.73E-09 | 4.54E-08 | 2.99E-08 | 38 |
| BP | GO:1905952 | 26/655 | 189/18862 | 2.15E-09 | 5.54E-08 | 3.64E-08 | 26 |
| BP | GO:0003018 | 30/655 | 245/18862 | 2.15E-09 | 5.54E-08 | 3.64E-08 | 30 |
| BP | GO:0045926 | 30/655 | 245/18862 | 2.15E-09 | 5.54E-08 | 3.64E-08 | 30 |
| BP | GO:0001503 | 40/655 | 401/18862 | 2.25E-09 | 5.73E-08 | 3.77E-08 | 40 |
| BP | GO:0032613 | 15/655 | 62/18862  | 2.25E-09 | 5.73E-08 | 3.77E-08 | 15 |
| BP | GO:0070482 | 39/655 | 385/18862 | 2.31E-09 | 5.85E-08 | 3.84E-08 | 39 |
| BP | GO:0007200 | 19/655 | 103/18862 | 2.32E-09 | 5.85E-08 | 3.84E-08 | 19 |
| BP | GO:0050770 | 23/655 | 151/18862 | 2.47E-09 | 6.20E-08 | 4.08E-08 | 23 |
| BP | GO:0030099 | 41/655 | 419/18862 | 2.49E-09 | 6.21E-08 | 4.08E-08 | 41 |
| BP | GO:0002573 | 27/655 | 204/18862 | 2.50E-09 | 6.21E-08 | 4.08E-08 | 27 |
| BP | GO:0019932 | 34/655 | 307/18862 | 2.59E-09 | 6.40E-08 | 4.21E-08 | 34 |
| BP | GO:0007631 | 18/655 | 93/18862  | 2.74E-09 | 6.71E-08 | 4.42E-08 | 18 |
| BP | GO:0001558 | 40/655 | 406/18862 | 3.21E-09 | 7.85E-08 | 5.16E-08 | 40 |
| BP | GO:0050764 | 18/655 | 94/18862  | 3.28E-09 | 7.96E-08 | 5.23E-08 | 18 |
| BP | GO:0071900 | 45/655 | 492/18862 | 3.45E-09 | 8.33E-08 | 5.48E-08 | 45 |

|    |            |        |           |          |          |          |    |
|----|------------|--------|-----------|----------|----------|----------|----|
| BP | GO:0023061 | 44/655 | 475/18862 | 3.51E-09 | 8.45E-08 | 5.56E-08 | 44 |
| BP | GO:1902107 | 23/655 | 154/18862 | 3.66E-09 | 8.70E-08 | 5.72E-08 | 23 |
| BP | GO:1903708 | 23/655 | 154/18862 | 3.66E-09 | 8.70E-08 | 5.72E-08 | 23 |
| BP | GO:0048588 | 28/655 | 222/18862 | 3.81E-09 | 9.01E-08 | 5.93E-08 | 28 |
| BP | GO:0002221 | 27/655 | 208/18862 | 3.85E-09 | 9.06E-08 | 5.96E-08 | 27 |
| BP | GO:0045089 | 28/655 | 223/18862 | 4.21E-09 | 9.87E-08 | 6.49E-08 | 28 |
| BP | GO:0007189 | 22/655 | 143/18862 | 4.54E-09 | 1.06E-07 | 6.97E-08 | 22 |
| BP | GO:0032652 | 20/655 | 119/18862 | 4.79E-09 | 1.11E-07 | 7.30E-08 | 20 |
| BP | GO:0060560 | 28/655 | 225/18862 | 5.15E-09 | 1.19E-07 | 7.82E-08 | 28 |
| BP | GO:0002224 | 23/655 | 157/18862 | 5.35E-09 | 1.23E-07 | 8.09E-08 | 23 |
| BP | GO:0098801 | 11/655 | 32/18862  | 5.41E-09 | 1.24E-07 | 8.13E-08 | 11 |
| BP | GO:0050767 | 36/655 | 348/18862 | 5.54E-09 | 1.26E-07 | 8.29E-08 | 36 |
| BP | GO:0002700 | 22/655 | 146/18862 | 6.75E-09 | 1.53E-07 | 1.01E-07 | 22 |
| BP | GO:0016049 | 43/655 | 470/18862 | 7.70E-09 | 1.73E-07 | 1.14E-07 | 43 |
| BP | GO:0032680 | 23/655 | 160/18862 | 7.76E-09 | 1.74E-07 | 1.14E-07 | 23 |
| BP | GO:0070665 | 22/655 | 148/18862 | 8.74E-09 | 1.95E-07 | 1.28E-07 | 22 |
| BP | GO:0010634 | 24/655 | 175/18862 | 9.49E-09 | 2.09E-07 | 1.37E-07 | 24 |
| BP | GO:0045619 | 24/655 | 175/18862 | 9.49E-09 | 2.09E-07 | 1.37E-07 | 24 |
| BP | GO:0097696 | 24/655 | 175/18862 | 9.49E-09 | 2.09E-07 | 1.37E-07 | 24 |
| BP | GO:0060759 | 25/655 | 189/18862 | 9.87E-09 | 2.15E-07 | 1.42E-07 | 25 |
| BP | GO:0032640 | 23/655 | 162/18862 | 9.88E-09 | 2.15E-07 | 1.42E-07 | 23 |
| BP | GO:0010632 | 32/655 | 293/18862 | 1.07E-08 | 2.33E-07 | 1.53E-07 | 32 |
| BP | GO:0097305 | 28/655 | 233/18862 | 1.12E-08 | 2.41E-07 | 1.58E-07 | 28 |
| BP | GO:0044060 | 11/655 | 34/18862  | 1.13E-08 | 2.41E-07 | 1.58E-07 | 11 |
| BP | GO:0050777 | 22/655 | 150/18862 | 1.13E-08 | 2.41E-07 | 1.58E-07 | 22 |
| BP | GO:0030098 | 36/655 | 358/18862 | 1.17E-08 | 2.49E-07 | 1.64E-07 | 36 |
| BP | GO:0002825 | 10/655 | 27/18862  | 1.18E-08 | 2.50E-07 | 1.64E-07 | 10 |
| BP | GO:0001959 | 24/655 | 177/18862 | 1.19E-08 | 2.51E-07 | 1.65E-07 | 24 |
| BP | GO:1903555 | 23/655 | 164/18862 | 1.25E-08 | 2.63E-07 | 1.73E-07 | 23 |
| BP | GO:0036293 | 36/655 | 360/18862 | 1.35E-08 | 2.83E-07 | 1.86E-07 | 36 |
| BP | GO:0030517 | 12/655 | 43/18862  | 1.59E-08 | 3.31E-07 | 2.18E-07 | 12 |
| BP | GO:1990845 | 22/655 | 153/18862 | 1.63E-08 | 3.38E-07 | 2.22E-07 | 22 |
| BP | GO:0032306 | 7/655  | 11/18862  | 1.72E-08 | 3.54E-07 | 2.33E-07 | 7  |
| BP | GO:0032308 | 7/655  | 11/18862  | 1.72E-08 | 3.54E-07 | 2.33E-07 | 7  |
| BP | GO:0071706 | 23/655 | 167/18862 | 1.78E-08 | 3.64E-07 | 2.39E-07 | 23 |
| BP | GO:0001666 | 35/655 | 348/18862 | 1.86E-08 | 3.79E-07 | 2.50E-07 | 35 |
| BP | GO:0060393 | 14/655 | 62/18862  | 2.01E-08 | 4.08E-07 | 2.68E-07 | 14 |
| BP | GO:0048754 | 21/655 | 143/18862 | 2.37E-08 | 4.78E-07 | 3.14E-07 | 21 |
| BP | GO:0030308 | 24/655 | 185/18862 | 2.86E-08 | 5.74E-07 | 3.77E-07 | 24 |
| BP | GO:0032675 | 22/655 | 158/18862 | 2.97E-08 | 5.94E-07 | 3.90E-07 | 22 |
| BP | GO:0042100 | 17/655 | 96/18862  | 3.05E-08 | 6.06E-07 | 3.99E-07 | 17 |
| BP | GO:0048661 | 17/655 | 96/18862  | 3.05E-08 | 6.06E-07 | 3.99E-07 | 17 |
| BP | GO:0001763 | 24/655 | 186/18862 | 3.17E-08 | 6.27E-07 | 4.12E-07 | 24 |
| BP | GO:0032611 | 18/655 | 108/18862 | 3.22E-08 | 6.33E-07 | 4.16E-07 | 18 |
| BP | GO:0061138 | 23/655 | 173/18862 | 3.49E-08 | 6.84E-07 | 4.50E-07 | 23 |
| BP | GO:0001755 | 13/655 | 55/18862  | 3.59E-08 | 7.01E-07 | 4.61E-07 | 13 |
| BP | GO:0032755 | 16/655 | 86/18862  | 3.76E-08 | 7.27E-07 | 4.78E-07 | 16 |
| BP | GO:0034103 | 16/655 | 86/18862  | 3.76E-08 | 7.27E-07 | 4.78E-07 | 16 |
| BP | GO:0034694 | 10/655 | 30/18862  | 3.82E-08 | 7.35E-07 | 4.84E-07 | 10 |

|    |            |        |           |          |          |          |    |
|----|------------|--------|-----------|----------|----------|----------|----|
| BP | GO:0043542 | 30/655 | 278/18862 | 4.07E-08 | 7.81E-07 | 5.13E-07 | 30 |
| BP | GO:0002285 | 24/655 | 189/18862 | 4.33E-08 | 8.28E-07 | 5.45E-07 | 24 |
| BP | GO:0050671 | 20/655 | 135/18862 | 4.38E-08 | 8.34E-07 | 5.49E-07 | 20 |
| BP | GO:0032635 | 22/655 | 162/18862 | 4.69E-08 | 8.89E-07 | 5.85E-07 | 22 |
| BP | GO:0050771 | 14/655 | 66/18862  | 4.71E-08 | 8.89E-07 | 5.85E-07 | 14 |
| BP | GO:0001774 | 12/655 | 47/18862  | 4.77E-08 | 8.97E-07 | 5.90E-07 | 12 |
| BP | GO:0002702 | 17/655 | 99/18862  | 4.91E-08 | 9.19E-07 | 6.05E-07 | 17 |
| BP | GO:0032946 | 20/655 | 136/18862 | 4.97E-08 | 9.27E-07 | 6.10E-07 | 20 |
| BP | GO:0071675 | 18/655 | 111/18862 | 4.99E-08 | 9.27E-07 | 6.10E-07 | 18 |
| BP | GO:0046887 | 19/655 | 124/18862 | 5.47E-08 | 1.01E-06 | 6.66E-07 | 19 |
| BP | GO:0032660 | 11/655 | 39/18862  | 5.63E-08 | 1.04E-06 | 6.82E-07 | 11 |
| BP | GO:0050766 | 14/655 | 67/18862  | 5.76E-08 | 1.06E-06 | 6.96E-07 | 14 |
| BP | GO:0010862 | 12/655 | 48/18862  | 6.16E-08 | 1.13E-06 | 7.41E-07 | 12 |
| BP | GO:0001906 | 23/655 | 179/18862 | 6.64E-08 | 1.21E-06 | 7.95E-07 | 23 |
| BP | GO:2000379 | 17/655 | 101/18862 | 6.66E-08 | 1.21E-06 | 7.95E-07 | 17 |
| BP | GO:0002703 | 25/655 | 209/18862 | 7.50E-08 | 1.36E-06 | 8.92E-07 | 25 |
| BP | GO:0035296 | 19/655 | 127/18862 | 8.10E-08 | 1.45E-06 | 9.56E-07 | 19 |
| BP | GO:0097746 | 19/655 | 127/18862 | 8.10E-08 | 1.45E-06 | 9.56E-07 | 19 |
| BP | GO:0060485 | 30/655 | 287/18862 | 8.31E-08 | 1.48E-06 | 9.77E-07 | 30 |
| BP | GO:0007171 | 7/655  | 13/18862  | 8.44E-08 | 1.50E-06 | 9.88E-07 | 7  |
| BP | GO:0001823 | 16/655 | 91/18862  | 8.62E-08 | 1.52E-06 | 1.00E-06 | 16 |
| BP | GO:0050927 | 9/655  | 25/18862  | 8.63E-08 | 1.52E-06 | 1.00E-06 | 9  |
| BP | GO:0032535 | 35/655 | 370/18862 | 8.64E-08 | 1.52E-06 | 1.00E-06 | 35 |
| BP | GO:0051960 | 38/655 | 422/18862 | 8.81E-08 | 1.54E-06 | 1.02E-06 | 38 |
| BP | GO:0014032 | 15/655 | 80/18862  | 8.98E-08 | 1.57E-06 | 1.03E-06 | 15 |
| BP | GO:0002695 | 23/655 | 182/18862 | 9.05E-08 | 1.57E-06 | 1.04E-06 | 23 |
| BP | GO:0035150 | 19/655 | 128/18862 | 9.21E-08 | 1.60E-06 | 1.05E-06 | 19 |
| BP | GO:0042088 | 11/655 | 41/18862  | 9.95E-08 | 1.72E-06 | 1.13E-06 | 11 |
| BP | GO:0032874 | 18/655 | 116/18862 | 1.00E-07 | 1.73E-06 | 1.13E-06 | 18 |
| BP | GO:0030516 | 16/655 | 92/18862  | 1.01E-07 | 1.73E-06 | 1.14E-06 | 16 |
| BP | GO:0045637 | 28/655 | 258/18862 | 1.02E-07 | 1.74E-06 | 1.15E-06 | 28 |
| BP | GO:0010720 | 30/655 | 290/18862 | 1.05E-07 | 1.78E-06 | 1.17E-06 | 30 |
| BP | GO:0140353 | 15/655 | 81/18862  | 1.07E-07 | 1.81E-06 | 1.19E-06 | 15 |
| BP | GO:0032615 | 13/655 | 60/18862  | 1.09E-07 | 1.82E-06 | 1.20E-06 | 13 |
| BP | GO:0032653 | 13/655 | 60/18862  | 1.09E-07 | 1.82E-06 | 1.20E-06 | 13 |
| BP | GO:0032655 | 13/655 | 60/18862  | 1.09E-07 | 1.82E-06 | 1.20E-06 | 13 |
| BP | GO:0032303 | 8/655  | 19/18862  | 1.09E-07 | 1.82E-06 | 1.20E-06 | 8  |
| BP | GO:0032368 | 21/655 | 156/18862 | 1.10E-07 | 1.84E-06 | 1.21E-06 | 21 |
| BP | GO:0030198 | 36/655 | 393/18862 | 1.26E-07 | 2.10E-06 | 1.38E-06 | 36 |
| BP | GO:0050926 | 9/655  | 26/18862  | 1.28E-07 | 2.11E-06 | 1.39E-06 | 9  |
| BP | GO:0050866 | 24/655 | 200/18862 | 1.28E-07 | 2.12E-06 | 1.39E-06 | 24 |
| BP | GO:0003014 | 18/655 | 118/18862 | 1.31E-07 | 2.13E-06 | 1.40E-06 | 18 |
| BP | GO:0070304 | 18/655 | 118/18862 | 1.31E-07 | 2.13E-06 | 1.40E-06 | 18 |
| BP | GO:0106106 | 20/655 | 144/18862 | 1.31E-07 | 2.13E-06 | 1.40E-06 | 20 |
| BP | GO:0120161 | 20/655 | 144/18862 | 1.31E-07 | 2.13E-06 | 1.40E-06 | 20 |
| BP | GO:0019731 | 13/655 | 61/18862  | 1.34E-07 | 2.17E-06 | 1.43E-06 | 13 |
| BP | GO:0043062 | 36/655 | 394/18862 | 1.35E-07 | 2.17E-06 | 1.43E-06 | 36 |
| BP | GO:0048864 | 15/655 | 83/18862  | 1.50E-07 | 2.40E-06 | 1.58E-06 | 15 |
| BP | GO:0045229 | 36/655 | 396/18862 | 1.53E-07 | 2.45E-06 | 1.61E-06 | 36 |

|    |            |        |           |          |          |          |    |
|----|------------|--------|-----------|----------|----------|----------|----|
| BP | GO:0002526 | 17/655 | 107/18862 | 1.59E-07 | 2.54E-06 | 1.67E-06 | 17 |
| BP | GO:0033138 | 17/655 | 107/18862 | 1.59E-07 | 2.54E-06 | 1.67E-06 | 17 |
| BP | GO:0032602 | 16/655 | 95/18862  | 1.60E-07 | 2.55E-06 | 1.67E-06 | 16 |
| BP | GO:0032310 | 7/655  | 14/18862  | 1.64E-07 | 2.57E-06 | 1.69E-06 | 7  |
| BP | GO:0050930 | 7/655  | 14/18862  | 1.64E-07 | 2.57E-06 | 1.69E-06 | 7  |
| BP | GO:0002437 | 13/655 | 62/18862  | 1.64E-07 | 2.57E-06 | 1.69E-06 | 13 |
| BP | GO:0042698 | 13/655 | 62/18862  | 1.64E-07 | 2.57E-06 | 1.69E-06 | 13 |
| BP | GO:0032620 | 11/655 | 43/18862  | 1.70E-07 | 2.65E-06 | 1.75E-06 | 11 |
| BP | GO:0002718 | 15/655 | 84/18862  | 1.76E-07 | 2.73E-06 | 1.80E-06 | 15 |
| BP | GO:0014031 | 15/655 | 84/18862  | 1.76E-07 | 2.73E-06 | 1.80E-06 | 15 |
| BP | GO:0042554 | 10/655 | 35/18862  | 1.99E-07 | 3.08E-06 | 2.02E-06 | 10 |
| BP | GO:0050829 | 15/655 | 85/18862  | 2.07E-07 | 3.19E-06 | 2.10E-06 | 15 |
| BP | GO:0031348 | 26/655 | 236/18862 | 2.17E-07 | 3.32E-06 | 2.19E-06 | 26 |
| BP | GO:0070555 | 24/655 | 206/18862 | 2.24E-07 | 3.43E-06 | 2.26E-06 | 24 |
| BP | GO:0050830 | 16/655 | 98/18862  | 2.50E-07 | 3.81E-06 | 2.51E-06 | 16 |
| BP | GO:0046879 | 30/655 | 302/18862 | 2.54E-07 | 3.86E-06 | 2.54E-06 | 30 |
| BP | GO:0002286 | 17/655 | 111/18862 | 2.75E-07 | 4.15E-06 | 2.73E-06 | 17 |
| BP | GO:0031623 | 17/655 | 111/18862 | 2.75E-07 | 4.15E-06 | 2.73E-06 | 17 |
| BP | GO:0032760 | 15/655 | 87/18862  | 2.84E-07 | 4.28E-06 | 2.82E-06 | 15 |
| BP | GO:0002824 | 16/655 | 99/18862  | 2.89E-07 | 4.33E-06 | 2.85E-06 | 16 |
| BP | GO:0007259 | 21/655 | 166/18862 | 3.21E-07 | 4.80E-06 | 3.16E-06 | 21 |
| BP | GO:1901653 | 35/655 | 391/18862 | 3.29E-07 | 4.91E-06 | 3.23E-06 | 35 |
| BP | GO:0007260 | 15/655 | 88/18862  | 3.32E-07 | 4.93E-06 | 3.24E-06 | 15 |
| BP | GO:0002686 | 11/655 | 46/18862  | 3.59E-07 | 5.31E-06 | 3.49E-06 | 11 |
| BP | GO:0043032 | 9/655  | 29/18862  | 3.73E-07 | 5.51E-06 | 3.62E-06 | 9  |
| BP | GO:0045621 | 16/655 | 101/18862 | 3.83E-07 | 5.64E-06 | 3.71E-06 | 16 |
| BP | GO:0032642 | 15/655 | 89/18862  | 3.87E-07 | 5.66E-06 | 3.72E-06 | 15 |
| BP | GO:0046849 | 15/655 | 89/18862  | 3.87E-07 | 5.66E-06 | 3.72E-06 | 15 |
| BP | GO:0000187 | 20/655 | 154/18862 | 3.99E-07 | 5.81E-06 | 3.82E-06 | 20 |
| BP | GO:0048675 | 17/655 | 114/18862 | 4.07E-07 | 5.92E-06 | 3.89E-06 | 17 |
| BP | GO:0001894 | 27/655 | 260/18862 | 4.20E-07 | 6.08E-06 | 4.00E-06 | 27 |
| BP | GO:0003081 | 8/655  | 22/18862  | 4.21E-07 | 6.08E-06 | 4.00E-06 | 8  |
| BP | GO:0031640 | 13/655 | 67/18862  | 4.28E-07 | 6.16E-06 | 4.05E-06 | 13 |
| BP | GO:0045639 | 16/655 | 102/18862 | 4.40E-07 | 6.32E-06 | 4.16E-06 | 16 |
| BP | GO:0014033 | 15/655 | 90/18862  | 4.50E-07 | 6.41E-06 | 4.22E-06 | 15 |
| BP | GO:1903557 | 15/655 | 90/18862  | 4.50E-07 | 6.41E-06 | 4.22E-06 | 15 |
| BP | GO:0032651 | 16/655 | 103/18862 | 5.05E-07 | 7.18E-06 | 4.72E-06 | 16 |
| BP | GO:0009914 | 30/655 | 312/18862 | 5.12E-07 | 7.23E-06 | 4.76E-06 | 30 |
| BP | GO:0007599 | 32/655 | 346/18862 | 5.13E-07 | 7.23E-06 | 4.76E-06 | 32 |
| BP | GO:0031649 | 7/655  | 16/18862  | 5.13E-07 | 7.23E-06 | 4.76E-06 | 7  |
| BP | GO:0048762 | 25/655 | 231/18862 | 5.18E-07 | 7.28E-06 | 4.79E-06 | 25 |
| BP | GO:0002821 | 16/655 | 104/18862 | 5.78E-07 | 8.09E-06 | 5.32E-06 | 16 |
| BP | GO:0050769 | 24/655 | 217/18862 | 5.88E-07 | 8.21E-06 | 5.40E-06 | 24 |
| BP | GO:0061041 | 18/655 | 131/18862 | 6.51E-07 | 9.06E-06 | 5.96E-06 | 18 |
| BP | GO:0002367 | 15/655 | 93/18862  | 6.96E-07 | 9.66E-06 | 6.35E-06 | 15 |
| BP | GO:0043030 | 12/655 | 59/18862  | 6.98E-07 | 9.66E-06 | 6.35E-06 | 12 |
| BP | GO:0010721 | 21/655 | 174/18862 | 7.09E-07 | 9.75E-06 | 6.41E-06 | 21 |
| BP | GO:0033209 | 21/655 | 174/18862 | 7.09E-07 | 9.75E-06 | 6.41E-06 | 21 |
| BP | GO:0071622 | 11/655 | 49/18862  | 7.13E-07 | 9.78E-06 | 6.43E-06 | 11 |



|    |            |        |           |          |          |          |    |
|----|------------|--------|-----------|----------|----------|----------|----|
| BP | GO:1903793 | 39/655 | 478/18862 | 7.60E-07 | 1.04E-05 | 6.84E-06 | 39 |
| BP | GO:0032735 | 10/655 | 40/18862  | 7.86E-07 | 1.07E-05 | 7.03E-06 | 10 |
| BP | GO:1902895 | 10/655 | 40/18862  | 7.86E-07 | 1.07E-05 | 7.03E-06 | 10 |
| BP | GO:0061098 | 12/655 | 60/18862  | 8.45E-07 | 1.14E-05 | 7.50E-06 | 12 |
| BP | GO:0015732 | 7/655  | 17/18862  | 8.47E-07 | 1.14E-05 | 7.50E-06 | 7  |
| BP | GO:0032305 | 7/655  | 17/18862  | 8.47E-07 | 1.14E-05 | 7.50E-06 | 7  |
| BP | GO:0060337 | 15/655 | 95/18862  | 9.23E-07 | 1.24E-05 | 8.16E-06 | 15 |
| BP | GO:2000377 | 22/655 | 192/18862 | 9.48E-07 | 1.27E-05 | 8.35E-06 | 22 |
| BP | GO:0010743 | 9/655  | 32/18862  | 9.52E-07 | 1.27E-05 | 8.35E-06 | 9  |
| BP | GO:0090022 | 9/655  | 32/18862  | 9.52E-07 | 1.27E-05 | 8.35E-06 | 9  |
| BP | GO:1901654 | 22/655 | 193/18862 | 1.04E-06 | 1.38E-05 | 9.05E-06 | 22 |
| BP | GO:0071357 | 15/655 | 96/18862  | 1.06E-06 | 1.40E-05 | 9.23E-06 | 15 |
| BP | GO:0046330 | 14/655 | 84/18862  | 1.08E-06 | 1.43E-05 | 9.42E-06 | 14 |
| BP | GO:0046850 | 11/655 | 51/18862  | 1.09E-06 | 1.44E-05 | 9.45E-06 | 11 |
| BP | GO:1902893 | 11/655 | 51/18862  | 1.09E-06 | 1.44E-05 | 9.45E-06 | 11 |
| BP | GO:1903034 | 20/655 | 164/18862 | 1.10E-06 | 1.44E-05 | 9.49E-06 | 20 |
| BP | GO:0031100 | 13/655 | 73/18862  | 1.20E-06 | 1.57E-05 | 1.03E-05 | 13 |
| BP | GO:0045807 | 15/655 | 97/18862  | 1.21E-06 | 1.58E-05 | 1.04E-05 | 15 |
| BP | GO:0120162 | 15/655 | 97/18862  | 1.21E-06 | 1.58E-05 | 1.04E-05 | 15 |
| BP | GO:1901215 | 22/655 | 195/18862 | 1.23E-06 | 1.60E-05 | 1.05E-05 | 22 |
| BP | GO:0042509 | 14/655 | 85/18862  | 1.26E-06 | 1.62E-05 | 1.07E-05 | 14 |
| BP | GO:1905332 | 9/655  | 33/18862  | 1.27E-06 | 1.64E-05 | 1.08E-05 | 9  |
| BP | GO:0001867 | 6/655  | 12/18862  | 1.32E-06 | 1.70E-05 | 1.12E-05 | 6  |
| BP | GO:0032656 | 7/655  | 18/18862  | 1.34E-06 | 1.72E-05 | 1.13E-05 | 7  |
| BP | GO:0061614 | 11/655 | 52/18862  | 1.34E-06 | 1.72E-05 | 1.13E-05 | 11 |
| BP | GO:0046883 | 26/655 | 260/18862 | 1.41E-06 | 1.79E-05 | 1.18E-05 | 26 |
| BP | GO:0001657 | 14/655 | 86/18862  | 1.45E-06 | 1.85E-05 | 1.22E-05 | 14 |
| BP | GO:0043123 | 21/655 | 182/18862 | 1.49E-06 | 1.89E-05 | 1.24E-05 | 21 |
| BP | GO:0042102 | 15/655 | 99/18862  | 1.58E-06 | 2.00E-05 | 1.32E-05 | 15 |
| BP | GO:0019722 | 22/655 | 198/18862 | 1.60E-06 | 2.01E-05 | 1.32E-05 | 22 |
| BP | GO:0042129 | 20/655 | 168/18862 | 1.61E-06 | 2.03E-05 | 1.33E-05 | 20 |
| BP | GO:0002720 | 11/655 | 53/18862  | 1.64E-06 | 2.06E-05 | 1.36E-05 | 11 |
| BP | GO:0030217 | 25/655 | 246/18862 | 1.67E-06 | 2.09E-05 | 1.37E-05 | 25 |
| BP | GO:0072163 | 14/655 | 87/18862  | 1.68E-06 | 2.09E-05 | 1.37E-05 | 14 |
| BP | GO:0072164 | 14/655 | 87/18862  | 1.68E-06 | 2.09E-05 | 1.37E-05 | 14 |
| BP | GO:0032732 | 12/655 | 64/18862  | 1.75E-06 | 2.17E-05 | 1.42E-05 | 12 |
| BP | GO:0035710 | 15/655 | 100/18862 | 1.80E-06 | 2.23E-05 | 1.47E-05 | 15 |
| BP | GO:0010594 | 24/655 | 231/18862 | 1.82E-06 | 2.24E-05 | 1.47E-05 | 24 |
| BP | GO:0006968 | 11/655 | 54/18862  | 2.00E-06 | 2.46E-05 | 1.62E-05 | 11 |
| BP | GO:0034340 | 15/655 | 101/18862 | 2.05E-06 | 2.52E-05 | 1.66E-05 | 15 |
| BP | GO:0035813 | 7/655  | 19/18862  | 2.06E-06 | 2.53E-05 | 1.66E-05 | 7  |
| BP | GO:0002755 | 9/655  | 35/18862  | 2.18E-06 | 2.67E-05 | 1.75E-05 | 9  |
| BP | GO:0002706 | 19/655 | 157/18862 | 2.29E-06 | 2.78E-05 | 1.83E-05 | 19 |
| BP | GO:0071887 | 15/655 | 102/18862 | 2.33E-06 | 2.83E-05 | 1.86E-05 | 15 |
| BP | GO:0090092 | 25/655 | 251/18862 | 2.41E-06 | 2.92E-05 | 1.92E-05 | 25 |
| BP | GO:0051235 | 29/655 | 319/18862 | 2.47E-06 | 2.98E-05 | 1.96E-05 | 29 |
| BP | GO:0071624 | 8/655  | 27/18862  | 2.51E-06 | 3.01E-05 | 1.98E-05 | 8  |
| BP | GO:0090025 | 8/655  | 27/18862  | 2.51E-06 | 3.01E-05 | 1.98E-05 | 8  |
| BP | GO:1901214 | 28/655 | 302/18862 | 2.51E-06 | 3.01E-05 | 1.98E-05 | 28 |

|    |            |        |           |          |          |          |    |
|----|------------|--------|-----------|----------|----------|----------|----|
| BP | GO:0060986 | 10/655 | 45/18862  | 2.53E-06 | 3.03E-05 | 1.99E-05 | 10 |
| BP | GO:0014068 | 14/655 | 90/18862  | 2.55E-06 | 3.04E-05 | 2.00E-05 | 14 |
| BP | GO:0002709 | 13/655 | 78/18862  | 2.62E-06 | 3.11E-05 | 2.05E-05 | 13 |
| BP | GO:0050772 | 13/655 | 78/18862  | 2.62E-06 | 3.11E-05 | 2.05E-05 | 13 |
| BP | GO:0032892 | 9/655  | 36/18862  | 2.82E-06 | 3.34E-05 | 2.20E-05 | 9  |
| BP | GO:0007187 | 12/655 | 67/18862  | 2.90E-06 | 3.42E-05 | 2.25E-05 | 12 |
| BP | GO:2000514 | 12/655 | 67/18862  | 2.90E-06 | 3.42E-05 | 2.25E-05 | 12 |
| BP | GO:0060760 | 11/655 | 56/18862  | 2.92E-06 | 3.43E-05 | 2.26E-05 | 11 |
| BP | GO:0002456 | 15/655 | 104/18862 | 2.99E-06 | 3.50E-05 | 2.30E-05 | 15 |
| BP | GO:0050728 | 19/655 | 160/18862 | 3.04E-06 | 3.54E-05 | 2.33E-05 | 19 |
| BP | GO:0051048 | 19/655 | 160/18862 | 3.04E-06 | 3.54E-05 | 2.33E-05 | 19 |
| BP | GO:0032616 | 7/655  | 20/18862  | 3.08E-06 | 3.56E-05 | 2.34E-05 | 7  |
| BP | GO:0051767 | 7/655  | 20/18862  | 3.08E-06 | 3.56E-05 | 2.34E-05 | 7  |
| BP | GO:0051769 | 7/655  | 20/18862  | 3.08E-06 | 3.56E-05 | 2.34E-05 | 7  |
| BP | GO:0006953 | 10/655 | 46/18862  | 3.13E-06 | 3.62E-05 | 2.38E-05 | 10 |
| BP | GO:0045580 | 18/655 | 146/18862 | 3.22E-06 | 3.70E-05 | 2.43E-05 | 18 |
| BP | GO:0002761 | 16/655 | 118/18862 | 3.23E-06 | 3.70E-05 | 2.43E-05 | 16 |
| BP | GO:0051928 | 16/655 | 118/18862 | 3.23E-06 | 3.70E-05 | 2.43E-05 | 16 |
| BP | GO:0010595 | 17/655 | 132/18862 | 3.30E-06 | 3.77E-05 | 2.48E-05 | 17 |
| BP | GO:0055017 | 14/655 | 92/18862  | 3.33E-06 | 3.80E-05 | 2.50E-05 | 14 |
| BP | GO:0001649 | 23/655 | 223/18862 | 3.36E-06 | 3.82E-05 | 2.52E-05 | 23 |
| BP | GO:0070997 | 30/655 | 342/18862 | 3.44E-06 | 3.90E-05 | 2.57E-05 | 30 |
| BP | GO:0042531 | 12/655 | 69/18862  | 4.00E-06 | 4.53E-05 | 2.98E-05 | 12 |
| BP | GO:0061097 | 14/655 | 94/18862  | 4.33E-06 | 4.89E-05 | 3.21E-05 | 14 |
| BP | GO:1990138 | 19/655 | 164/18862 | 4.39E-06 | 4.95E-05 | 3.25E-05 | 19 |
| BP | GO:0051051 | 35/655 | 438/18862 | 4.47E-06 | 5.03E-05 | 3.30E-05 | 35 |
| BP | GO:0035812 | 7/655  | 21/18862  | 4.48E-06 | 5.03E-05 | 3.31E-05 | 7  |
| BP | GO:0042098 | 21/655 | 195/18862 | 4.52E-06 | 5.04E-05 | 3.32E-05 | 21 |
| BP | GO:0048511 | 27/655 | 294/18862 | 4.52E-06 | 5.04E-05 | 3.32E-05 | 27 |
| BP | GO:0010742 | 9/655  | 38/18862  | 4.59E-06 | 5.06E-05 | 3.33E-05 | 9  |
| BP | GO:0032733 | 9/655  | 38/18862  | 4.59E-06 | 5.06E-05 | 3.33E-05 | 9  |
| BP | GO:0048246 | 9/655  | 38/18862  | 4.59E-06 | 5.06E-05 | 3.33E-05 | 9  |
| BP | GO:0048286 | 9/655  | 38/18862  | 4.59E-06 | 5.06E-05 | 3.33E-05 | 9  |
| BP | GO:0090077 | 9/655  | 38/18862  | 4.59E-06 | 5.06E-05 | 3.33E-05 | 9  |
| BP | GO:0045123 | 12/655 | 70/18862  | 4.68E-06 | 5.15E-05 | 3.38E-05 | 12 |
| BP | GO:0071347 | 20/655 | 180/18862 | 4.72E-06 | 5.17E-05 | 3.40E-05 | 20 |
| BP | GO:0002673 | 10/655 | 48/18862  | 4.72E-06 | 5.17E-05 | 3.40E-05 | 10 |
| BP | GO:0045834 | 18/655 | 150/18862 | 4.74E-06 | 5.17E-05 | 3.40E-05 | 18 |
| BP | GO:0019216 | 33/655 | 402/18862 | 4.74E-06 | 5.17E-05 | 3.40E-05 | 33 |
| BP | GO:0032872 | 20/655 | 181/18862 | 5.14E-06 | 5.58E-05 | 3.67E-05 | 20 |
| BP | GO:0051962 | 25/655 | 263/18862 | 5.55E-06 | 6.02E-05 | 3.96E-05 | 25 |
| BP | GO:0001961 | 10/655 | 49/18862  | 5.75E-06 | 6.22E-05 | 4.09E-05 | 10 |
| BP | GO:0051961 | 17/655 | 138/18862 | 6.07E-06 | 6.53E-05 | 4.29E-05 | 17 |
| BP | GO:0090288 | 15/655 | 110/18862 | 6.08E-06 | 6.53E-05 | 4.29E-05 | 15 |
| BP | GO:1904892 | 15/655 | 110/18862 | 6.08E-06 | 6.53E-05 | 4.29E-05 | 15 |
| BP | GO:0051250 | 18/655 | 153/18862 | 6.28E-06 | 6.74E-05 | 4.43E-05 | 18 |
| BP | GO:0007249 | 26/655 | 282/18862 | 6.30E-06 | 6.74E-05 | 4.44E-05 | 26 |
| BP | GO:0032700 | 7/655  | 22/18862  | 6.38E-06 | 6.79E-05 | 4.47E-05 | 7  |
| BP | GO:0044062 | 7/655  | 22/18862  | 6.38E-06 | 6.79E-05 | 4.47E-05 | 7  |

|    |            |        |           |          |          |          |    |
|----|------------|--------|-----------|----------|----------|----------|----|
| BP | GO:0044406 | 6/655  | 15/18862  | 6.56E-06 | 6.95E-05 | 4.57E-05 | 6  |
| BP | GO:0051770 | 6/655  | 15/18862  | 6.56E-06 | 6.95E-05 | 4.57E-05 | 6  |
| BP | GO:0070302 | 20/655 | 184/18862 | 6.60E-06 | 6.97E-05 | 4.59E-05 | 20 |
| BP | GO:1905954 | 15/655 | 111/18862 | 6.80E-06 | 7.18E-05 | 4.72E-05 | 15 |
| BP | GO:0002705 | 16/655 | 125/18862 | 6.91E-06 | 7.27E-05 | 4.78E-05 | 16 |
| BP | GO:0019229 | 11/655 | 61/18862  | 7.01E-06 | 7.33E-05 | 4.82E-05 | 11 |
| BP | GO:0030888 | 11/655 | 61/18862  | 7.01E-06 | 7.33E-05 | 4.82E-05 | 11 |
| BP | GO:1905330 | 11/655 | 61/18862  | 7.01E-06 | 7.33E-05 | 4.82E-05 | 11 |
| BP | GO:0048639 | 19/655 | 170/18862 | 7.45E-06 | 7.77E-05 | 5.11E-05 | 19 |
| BP | GO:0001655 | 28/655 | 320/18862 | 7.60E-06 | 7.91E-05 | 5.21E-05 | 28 |
| BP | GO:0007178 | 30/655 | 358/18862 | 8.54E-06 | 8.88E-05 | 5.84E-05 | 30 |
| BP | GO:0003071 | 7/655  | 23/18862  | 8.89E-06 | 9.18E-05 | 6.04E-05 | 7  |
| BP | GO:0034695 | 7/655  | 23/18862  | 8.89E-06 | 9.18E-05 | 6.04E-05 | 7  |
| BP | GO:0072677 | 7/655  | 23/18862  | 8.89E-06 | 9.18E-05 | 6.04E-05 | 7  |
| BP | GO:0032689 | 9/655  | 41/18862  | 8.99E-06 | 9.26E-05 | 6.09E-05 | 9  |
| BP | GO:0060419 | 14/655 | 100/18862 | 9.06E-06 | 9.30E-05 | 6.12E-05 | 14 |
| BP | GO:0072001 | 26/655 | 288/18862 | 9.20E-06 | 9.43E-05 | 6.20E-05 | 26 |
| BP | GO:0007596 | 29/655 | 342/18862 | 9.61E-06 | 9.83E-05 | 6.47E-05 | 29 |
| BP | GO:0045670 | 11/655 | 63/18862  | 9.69E-06 | 9.87E-05 | 6.49E-05 | 11 |
| BP | GO:0071677 | 11/655 | 63/18862  | 9.69E-06 | 9.87E-05 | 6.49E-05 | 11 |
| BP | GO:0033135 | 17/655 | 143/18862 | 9.83E-06 | 9.99E-05 | 6.57E-05 | 17 |
| BP | GO:0071375 | 28/655 | 325/18862 | 1.02E-05 | 0.000103 | 6.78E-05 | 28 |
| BP | GO:0046634 | 14/655 | 101/18862 | 1.02E-05 | 0.000103 | 6.78E-05 | 14 |
| BP | GO:0052547 | 35/655 | 455/18862 | 1.03E-05 | 0.000104 | 6.81E-05 | 35 |
| BP | GO:0045582 | 13/655 | 88/18862  | 1.04E-05 | 0.000105 | 6.88E-05 | 13 |
| BP | GO:1902622 | 9/655  | 42/18862  | 1.11E-05 | 0.000112 | 7.34E-05 | 9  |
| BP | GO:0060395 | 12/655 | 76/18862  | 1.13E-05 | 0.000113 | 7.44E-05 | 12 |
| BP | GO:0048525 | 13/655 | 89/18862  | 1.18E-05 | 0.000118 | 7.73E-05 | 13 |
| BP | GO:0097306 | 13/655 | 89/18862  | 1.18E-05 | 0.000118 | 7.73E-05 | 13 |
| BP | GO:0018105 | 27/655 | 310/18862 | 1.20E-05 | 0.000119 | 7.85E-05 | 27 |
| BP | GO:0009620 | 10/655 | 53/18862  | 1.20E-05 | 0.000119 | 7.86E-05 | 10 |
| BP | GO:1905517 | 10/655 | 53/18862  | 1.20E-05 | 0.000119 | 7.86E-05 | 10 |
| BP | GO:0003094 | 7/655  | 24/18862  | 1.22E-05 | 0.00012  | 7.90E-05 | 7  |
| BP | GO:0032753 | 7/655  | 24/18862  | 1.22E-05 | 0.00012  | 7.90E-05 | 7  |
| BP | GO:0090023 | 7/655  | 24/18862  | 1.22E-05 | 0.00012  | 7.90E-05 | 7  |
| BP | GO:0050817 | 29/655 | 347/18862 | 1.27E-05 | 0.000125 | 8.20E-05 | 29 |
| BP | GO:0032729 | 11/655 | 65/18862  | 1.32E-05 | 0.00013  | 8.54E-05 | 11 |
| BP | GO:0030336 | 28/655 | 330/18862 | 1.35E-05 | 0.000132 | 8.69E-05 | 28 |
| BP | GO:0022602 | 9/655  | 43/18862  | 1.36E-05 | 0.000133 | 8.75E-05 | 9  |
| BP | GO:0007411 | 25/655 | 277/18862 | 1.37E-05 | 0.000133 | 8.78E-05 | 25 |
| BP | GO:0010977 | 16/655 | 132/18862 | 1.39E-05 | 0.000136 | 8.93E-05 | 16 |
| BP | GO:0007162 | 26/655 | 295/18862 | 1.41E-05 | 0.000137 | 8.99E-05 | 26 |
| BP | GO:0097485 | 25/655 | 278/18862 | 1.45E-05 | 0.000141 | 9.28E-05 | 25 |
| BP | GO:0090287 | 26/655 | 296/18862 | 1.49E-05 | 0.000144 | 9.50E-05 | 26 |
| BP | GO:0045342 | 6/655  | 17/18862  | 1.53E-05 | 0.000148 | 9.71E-05 | 6  |
| BP | GO:0050768 | 16/655 | 133/18862 | 1.53E-05 | 0.000148 | 9.73E-05 | 16 |
| BP | GO:0030193 | 11/655 | 66/18862  | 1.54E-05 | 0.000148 | 9.73E-05 | 11 |
| BP | GO:0002218 | 17/655 | 148/18862 | 1.55E-05 | 0.000149 | 9.81E-05 | 17 |
| BP | GO:0018209 | 28/655 | 333/18862 | 1.59E-05 | 0.000153 | 0.0001   | 28 |

|    |            |        |           |          |          |          |    |
|----|------------|--------|-----------|----------|----------|----------|----|
| BP | GO:0002092 | 7/655  | 25/18862  | 1.64E-05 | 0.000156 | 0.000103 | 7  |
| BP | GO:0003148 | 7/655  | 25/18862  | 1.64E-05 | 0.000156 | 0.000103 | 7  |
| BP | GO:0097205 | 7/655  | 25/18862  | 1.64E-05 | 0.000156 | 0.000103 | 7  |
| BP | GO:0001822 | 25/655 | 280/18862 | 1.64E-05 | 0.000156 | 0.000103 | 25 |
| BP | GO:0002691 | 8/655  | 34/18862  | 1.65E-05 | 0.000157 | 0.000103 | 8  |
| BP | GO:0051271 | 29/655 | 352/18862 | 1.66E-05 | 0.000157 | 0.000103 | 29 |
| BP | GO:0042310 | 12/655 | 79/18862  | 1.69E-05 | 0.000159 | 0.000105 | 12 |
| BP | GO:0048145 | 12/655 | 79/18862  | 1.69E-05 | 0.000159 | 0.000105 | 12 |
| BP | GO:0031345 | 19/655 | 180/18862 | 1.70E-05 | 0.000159 | 0.000105 | 19 |
| BP | GO:0046631 | 17/655 | 149/18862 | 1.70E-05 | 0.000159 | 0.000105 | 17 |
| BP | GO:1900046 | 11/655 | 67/18862  | 1.78E-05 | 0.000167 | 0.00011  | 11 |
| BP | GO:0032736 | 5/655  | 11/18862  | 1.93E-05 | 0.00018  | 0.000118 | 5  |
| BP | GO:0048144 | 12/655 | 80/18862  | 1.93E-05 | 0.00018  | 0.000118 | 12 |
| BP | GO:2000106 | 12/655 | 80/18862  | 1.93E-05 | 0.00018  | 0.000118 | 12 |
| BP | GO:0090100 | 14/655 | 107/18862 | 1.99E-05 | 0.000185 | 0.000122 | 14 |
| BP | GO:0032731 | 10/655 | 56/18862  | 2.00E-05 | 0.000185 | 0.000122 | 10 |
| BP | GO:0051353 | 10/655 | 56/18862  | 2.00E-05 | 0.000185 | 0.000122 | 10 |
| BP | GO:0031667 | 34/655 | 451/18862 | 2.08E-05 | 0.000192 | 0.000126 | 34 |
| BP | GO:0071772 | 18/655 | 167/18862 | 2.12E-05 | 0.000195 | 0.000128 | 18 |
| BP | GO:0071773 | 18/655 | 167/18862 | 2.12E-05 | 0.000195 | 0.000128 | 18 |
| BP | GO:0022617 | 12/655 | 81/18862  | 2.20E-05 | 0.000202 | 0.000133 | 12 |
| BP | GO:0002708 | 14/655 | 108/18862 | 2.22E-05 | 0.000203 | 0.000134 | 14 |
| BP | GO:0003012 | 34/655 | 453/18862 | 2.28E-05 | 0.000208 | 0.000137 | 34 |
| BP | GO:0043112 | 18/655 | 168/18862 | 2.30E-05 | 0.00021  | 0.000138 | 18 |
| BP | GO:0002040 | 19/655 | 184/18862 | 2.32E-05 | 0.000211 | 0.000139 | 19 |
| BP | GO:0097191 | 21/655 | 217/18862 | 2.35E-05 | 0.000213 | 0.00014  | 21 |
| BP | GO:0043551 | 10/655 | 57/18862  | 2.35E-05 | 0.000213 | 0.00014  | 10 |
| BP | GO:0048146 | 9/655  | 46/18862  | 2.42E-05 | 0.000219 | 0.000144 | 9  |
| BP | GO:2000107 | 9/655  | 46/18862  | 2.42E-05 | 0.000219 | 0.000144 | 9  |
| BP | GO:0045730 | 8/655  | 36/18862  | 2.59E-05 | 0.000234 | 0.000154 | 8  |
| BP | GO:0030509 | 17/655 | 154/18862 | 2.62E-05 | 0.000236 | 0.000155 | 17 |
| BP | GO:0006801 | 11/655 | 70/18862  | 2.73E-05 | 0.000245 | 0.000161 | 11 |
| BP | GO:0055021 | 11/655 | 70/18862  | 2.73E-05 | 0.000245 | 0.000161 | 11 |
| BP | GO:0031663 | 10/655 | 58/18862  | 2.76E-05 | 0.000247 | 0.000162 | 10 |
| BP | GO:0015850 | 24/655 | 271/18862 | 2.76E-05 | 0.000247 | 0.000162 | 24 |
| BP | GO:0009991 | 35/655 | 477/18862 | 2.78E-05 | 0.000248 | 0.000163 | 35 |
| BP | GO:1904705 | 12/655 | 83/18862  | 2.82E-05 | 0.000251 | 0.000165 | 12 |
| BP | GO:1990874 | 12/655 | 83/18862  | 2.82E-05 | 0.000251 | 0.000165 | 12 |
| BP | GO:0033688 | 7/655  | 27/18862  | 2.85E-05 | 0.000253 | 0.000166 | 7  |
| BP | GO:0045672 | 7/655  | 27/18862  | 2.85E-05 | 0.000253 | 0.000166 | 7  |
| BP | GO:0002698 | 15/655 | 125/18862 | 2.90E-05 | 0.000256 | 0.000168 | 15 |
| BP | GO:0097028 | 9/655  | 47/18862  | 2.90E-05 | 0.000256 | 0.000168 | 9  |
| BP | GO:2000146 | 28/655 | 345/18862 | 3.03E-05 | 0.000266 | 0.000175 | 28 |
| BP | GO:0051924 | 22/655 | 238/18862 | 3.08E-05 | 0.000271 | 0.000178 | 22 |
| BP | GO:0050818 | 11/655 | 71/18862  | 3.13E-05 | 0.000275 | 0.000181 | 11 |
| BP | GO:0060562 | 26/655 | 309/18862 | 3.14E-05 | 0.000275 | 0.000181 | 26 |
| BP | GO:0032634 | 6/655  | 19/18862  | 3.16E-05 | 0.000275 | 0.000181 | 6  |
| BP | GO:0032674 | 6/655  | 19/18862  | 3.16E-05 | 0.000275 | 0.000181 | 6  |
| BP | GO:0048245 | 6/655  | 19/18862  | 3.16E-05 | 0.000275 | 0.000181 | 6  |

|    |            |        |           |          |          |          |    |
|----|------------|--------|-----------|----------|----------|----------|----|
| BP | GO:1904064 | 16/655 | 141/18862 | 3.20E-05 | 0.000278 | 0.000183 | 16 |
| BP | GO:1904994 | 8/655  | 37/18862  | 3.20E-05 | 0.000278 | 0.000183 | 8  |
| BP | GO:0070493 | 5/655  | 12/18862  | 3.22E-05 | 0.000278 | 0.000183 | 5  |
| BP | GO:0006869 | 34/655 | 461/18862 | 3.26E-05 | 0.000281 | 0.000185 | 34 |
| BP | GO:0030278 | 14/655 | 112/18862 | 3.36E-05 | 0.00029  | 0.00019  | 14 |
| BP | GO:0045778 | 9/655  | 48/18862  | 3.47E-05 | 0.000297 | 0.000195 | 9  |
| BP | GO:0060688 | 9/655  | 48/18862  | 3.47E-05 | 0.000297 | 0.000195 | 9  |
| BP | GO:2000191 | 9/655  | 48/18862  | 3.47E-05 | 0.000297 | 0.000195 | 9  |
| BP | GO:2001238 | 9/655  | 48/18862  | 3.47E-05 | 0.000297 | 0.000195 | 9  |
| BP | GO:0014066 | 15/655 | 127/18862 | 3.50E-05 | 0.000299 | 0.000197 | 15 |
| BP | GO:0007193 | 12/655 | 85/18862  | 3.60E-05 | 0.000306 | 0.000202 | 12 |
| BP | GO:0032370 | 12/655 | 85/18862  | 3.60E-05 | 0.000306 | 0.000202 | 12 |
| BP | GO:0031098 | 24/655 | 276/18862 | 3.71E-05 | 0.000314 | 0.000207 | 24 |
| BP | GO:0030282 | 14/655 | 113/18862 | 3.71E-05 | 0.000314 | 0.000207 | 14 |
| BP | GO:0034764 | 20/655 | 207/18862 | 3.74E-05 | 0.000314 | 0.000207 | 20 |
| BP | GO:0034767 | 20/655 | 207/18862 | 3.74E-05 | 0.000314 | 0.000207 | 20 |
| BP | GO:0007588 | 10/655 | 60/18862  | 3.74E-05 | 0.000314 | 0.000207 | 10 |
| BP | GO:0032722 | 10/655 | 60/18862  | 3.74E-05 | 0.000314 | 0.000207 | 10 |
| BP | GO:0032890 | 10/655 | 60/18862  | 3.74E-05 | 0.000314 | 0.000207 | 10 |
| BP | GO:0045823 | 8/655  | 38/18862  | 3.94E-05 | 0.00033  | 0.000217 | 8  |
| BP | GO:0048738 | 20/655 | 208/18862 | 4.00E-05 | 0.000335 | 0.000221 | 20 |
| BP | GO:0007589 | 12/655 | 86/18862  | 4.05E-05 | 0.000339 | 0.000223 | 12 |
| BP | GO:0002292 | 11/655 | 73/18862  | 4.09E-05 | 0.000341 | 0.000224 | 11 |
| BP | GO:0006809 | 11/655 | 73/18862  | 4.09E-05 | 0.000341 | 0.000224 | 11 |
| BP | GO:0046328 | 15/655 | 129/18862 | 4.21E-05 | 0.00035  | 0.00023  | 15 |
| BP | GO:0051651 | 20/655 | 209/18862 | 4.29E-05 | 0.000356 | 0.000234 | 20 |
| BP | GO:0071379 | 6/655  | 20/18862  | 4.38E-05 | 0.000363 | 0.000239 | 6  |
| BP | GO:0009755 | 19/655 | 193/18862 | 4.50E-05 | 0.000372 | 0.000244 | 19 |
| BP | GO:0043122 | 22/655 | 244/18862 | 4.50E-05 | 0.000372 | 0.000244 | 22 |
| BP | GO:0003206 | 14/655 | 115/18862 | 4.52E-05 | 0.000373 | 0.000245 | 14 |
| BP | GO:1902624 | 7/655  | 29/18862  | 4.72E-05 | 0.000388 | 0.000255 | 7  |
| BP | GO:0045933 | 8/655  | 39/18862  | 4.80E-05 | 0.000394 | 0.000259 | 8  |
| BP | GO:2000516 | 8/655  | 39/18862  | 4.80E-05 | 0.000394 | 0.000259 | 8  |
| BP | GO:1904019 | 14/655 | 116/18862 | 4.98E-05 | 0.000408 | 0.000268 | 14 |
| BP | GO:0045453 | 10/655 | 62/18862  | 5.01E-05 | 0.000409 | 0.000269 | 10 |
| BP | GO:0031650 | 5/655  | 13/18862  | 5.08E-05 | 0.000412 | 0.000271 | 5  |
| BP | GO:0035815 | 5/655  | 13/18862  | 5.08E-05 | 0.000412 | 0.000271 | 5  |
| BP | GO:0060340 | 5/655  | 13/18862  | 5.08E-05 | 0.000412 | 0.000271 | 5  |
| BP | GO:0070664 | 12/655 | 88/18862  | 5.11E-05 | 0.000415 | 0.000273 | 12 |
| BP | GO:0010959 | 22/655 | 247/18862 | 5.41E-05 | 0.000437 | 0.000288 | 22 |
| BP | GO:0030072 | 22/655 | 247/18862 | 5.41E-05 | 0.000437 | 0.000288 | 22 |
| BP | GO:0051098 | 28/655 | 357/18862 | 5.55E-05 | 0.000448 | 0.000294 | 28 |
| BP | GO:0043277 | 9/655  | 51/18862  | 5.73E-05 | 0.000461 | 0.000303 | 9  |
| BP | GO:0043900 | 9/655  | 51/18862  | 5.73E-05 | 0.000461 | 0.000303 | 9  |
| BP | GO:0048662 | 10/655 | 63/18862  | 5.77E-05 | 0.000463 | 0.000305 | 10 |
| BP | GO:0071774 | 16/655 | 148/18862 | 5.79E-05 | 0.000463 | 0.000305 | 16 |
| BP | GO:0045776 | 8/655  | 40/18862  | 5.82E-05 | 0.000463 | 0.000305 | 8  |
| BP | GO:0098760 | 8/655  | 40/18862  | 5.82E-05 | 0.000463 | 0.000305 | 8  |
| BP | GO:0098761 | 8/655  | 40/18862  | 5.82E-05 | 0.000463 | 0.000305 | 8  |

|    |            |        |           |          |          |          |    |
|----|------------|--------|-----------|----------|----------|----------|----|
| BP | GO:1903524 | 8/655  | 40/18862  | 5.82E-05 | 0.000463 | 0.000305 | 8  |
| BP | GO:0043903 | 19/655 | 197/18862 | 5.95E-05 | 0.000473 | 0.000311 | 19 |
| BP | GO:0001960 | 11/655 | 76/18862  | 5.99E-05 | 0.000475 | 0.000312 | 11 |
| BP | GO:1903035 | 12/655 | 90/18862  | 6.40E-05 | 0.000507 | 0.000333 | 12 |
| BP | GO:0007568 | 25/655 | 304/18862 | 6.44E-05 | 0.000509 | 0.000335 | 25 |
| BP | GO:0060411 | 10/655 | 64/18862  | 6.63E-05 | 0.000523 | 0.000344 | 10 |
| BP | GO:0002711 | 9/655  | 52/18862  | 6.72E-05 | 0.000529 | 0.000348 | 9  |
| BP | GO:0046209 | 11/655 | 77/18862  | 6.77E-05 | 0.000532 | 0.00035  | 11 |
| BP | GO:0060420 | 11/655 | 77/18862  | 6.77E-05 | 0.000532 | 0.00035  | 11 |
| BP | GO:0035265 | 17/655 | 166/18862 | 6.83E-05 | 0.000535 | 0.000352 | 17 |
| BP | GO:0048863 | 22/655 | 251/18862 | 6.88E-05 | 0.000538 | 0.000354 | 22 |
| BP | GO:1903707 | 13/655 | 105/18862 | 7.04E-05 | 0.00055  | 0.000362 | 13 |
| BP | GO:0043524 | 15/655 | 135/18862 | 7.15E-05 | 0.000557 | 0.000367 | 15 |
| BP | GO:0002790 | 30/655 | 401/18862 | 7.25E-05 | 0.000564 | 0.000371 | 30 |
| BP | GO:0002793 | 16/655 | 151/18862 | 7.38E-05 | 0.000574 | 0.000377 | 16 |
| BP | GO:0001516 | 7/655  | 31/18862  | 7.49E-05 | 0.000579 | 0.000381 | 7  |
| BP | GO:0046457 | 7/655  | 31/18862  | 7.49E-05 | 0.000579 | 0.000381 | 7  |
| BP | GO:2000193 | 7/655  | 31/18862  | 7.49E-05 | 0.000579 | 0.000381 | 7  |
| BP | GO:2001057 | 11/655 | 78/18862  | 7.64E-05 | 0.00059  | 0.000388 | 11 |
| BP | GO:0014821 | 6/655  | 22/18862  | 7.94E-05 | 0.000612 | 0.000403 | 6  |
| BP | GO:0030316 | 12/655 | 92/18862  | 7.96E-05 | 0.000613 | 0.000403 | 12 |
| BP | GO:1903522 | 24/655 | 290/18862 | 8.13E-05 | 0.000624 | 0.000411 | 24 |
| BP | GO:0009612 | 19/655 | 202/18862 | 8.34E-05 | 0.00064  | 0.000421 | 19 |
| BP | GO:0014002 | 8/655  | 42/18862  | 8.41E-05 | 0.000644 | 0.000423 | 8  |
| BP | GO:0046632 | 13/655 | 107/18862 | 8.57E-05 | 0.000655 | 0.000431 | 13 |
| BP | GO:0002294 | 10/655 | 66/18862  | 8.68E-05 | 0.000662 | 0.000435 | 10 |
| BP | GO:0046635 | 10/655 | 66/18862  | 8.68E-05 | 0.000662 | 0.000435 | 10 |
| BP | GO:0045071 | 9/655  | 54/18862  | 9.13E-05 | 0.000693 | 0.000456 | 9  |
| BP | GO:0061756 | 9/655  | 54/18862  | 9.13E-05 | 0.000693 | 0.000456 | 9  |
| BP | GO:0052548 | 31/655 | 426/18862 | 9.20E-05 | 0.000698 | 0.000459 | 31 |
| BP | GO:0001501 | 34/655 | 486/18862 | 9.26E-05 | 0.000701 | 0.000461 | 34 |
| BP | GO:0016486 | 7/655  | 32/18862  | 9.30E-05 | 0.000701 | 0.000461 | 7  |
| BP | GO:0032673 | 7/655  | 32/18862  | 9.30E-05 | 0.000701 | 0.000461 | 7  |
| BP | GO:0033687 | 7/655  | 32/18862  | 9.30E-05 | 0.000701 | 0.000461 | 7  |
| BP | GO:0014065 | 16/655 | 154/18862 | 9.34E-05 | 0.000701 | 0.000461 | 16 |
| BP | GO:2001236 | 16/655 | 154/18862 | 9.34E-05 | 0.000701 | 0.000461 | 16 |
| BP | GO:1903409 | 14/655 | 123/18862 | 9.51E-05 | 0.000713 | 0.000469 | 14 |
| BP | GO:0002287 | 10/655 | 67/18862  | 9.89E-05 | 0.000736 | 0.000484 | 10 |
| BP | GO:0002293 | 10/655 | 67/18862  | 9.89E-05 | 0.000736 | 0.000484 | 10 |
| BP | GO:0002637 | 10/655 | 67/18862  | 9.89E-05 | 0.000736 | 0.000484 | 10 |
| BP | GO:0046637 | 10/655 | 67/18862  | 9.89E-05 | 0.000736 | 0.000484 | 10 |
| BP | GO:1901224 | 10/655 | 67/18862  | 9.89E-05 | 0.000736 | 0.000484 | 10 |
| BP | GO:1903531 | 15/655 | 139/18862 | 9.99E-05 | 0.00074  | 0.000487 | 15 |
| BP | GO:0032309 | 8/655  | 43/18862  | 0.0001   | 0.00074  | 0.000487 | 8  |
| BP | GO:0061383 | 8/655  | 43/18862  | 0.0001   | 0.00074  | 0.000487 | 8  |
| BP | GO:2000273 | 8/655  | 43/18862  | 0.0001   | 0.00074  | 0.000487 | 8  |
| BP | GO:0006816 | 30/655 | 409/18862 | 0.000103 | 0.000762 | 0.000501 | 30 |
| BP | GO:0032963 | 13/655 | 109/18862 | 0.000104 | 0.000765 | 0.000503 | 13 |
| BP | GO:0002021 | 6/655  | 23/18862  | 0.000104 | 0.000766 | 0.000504 | 6  |

|    |            |        |           |          |          |          |    |
|----|------------|--------|-----------|----------|----------|----------|----|
| BP | GO:0032693 | 6/655  | 23/18862  | 0.000104 | 0.000766 | 0.000504 | 6  |
| BP | GO:0030100 | 19/655 | 206/18862 | 0.000108 | 0.000792 | 0.000521 | 19 |
| BP | GO:0043367 | 11/655 | 81/18862  | 0.000108 | 0.000792 | 0.000521 | 11 |
| BP | GO:0060761 | 11/655 | 81/18862  | 0.000108 | 0.000792 | 0.000521 | 11 |
| BP | GO:0090277 | 12/655 | 95/18862  | 0.000109 | 0.000796 | 0.000524 | 12 |
| BP | GO:0002827 | 5/655  | 15/18862  | 0.000112 | 0.000814 | 0.000536 | 5  |
| BP | GO:0000302 | 20/655 | 224/18862 | 0.000113 | 0.000821 | 0.00054  | 20 |
| BP | GO:0032355 | 14/655 | 125/18862 | 0.000113 | 0.000823 | 0.000541 | 14 |
| BP | GO:0032633 | 7/655  | 33/18862  | 0.000115 | 0.000826 | 0.000543 | 7  |
| BP | GO:0032814 | 7/655  | 33/18862  | 0.000115 | 0.000826 | 0.000543 | 7  |
| BP | GO:0043552 | 7/655  | 33/18862  | 0.000115 | 0.000826 | 0.000543 | 7  |
| BP | GO:0051482 | 7/655  | 33/18862  | 0.000115 | 0.000826 | 0.000543 | 7  |
| BP | GO:0140448 | 7/655  | 33/18862  | 0.000115 | 0.000826 | 0.000543 | 7  |
| BP | GO:0030168 | 16/655 | 157/18862 | 0.000117 | 0.000845 | 0.000556 | 16 |
| BP | GO:0002639 | 8/655  | 44/18862  | 0.000119 | 0.000852 | 0.00056  | 8  |
| BP | GO:0045124 | 8/655  | 44/18862  | 0.000119 | 0.000852 | 0.00056  | 8  |
| BP | GO:0051403 | 22/655 | 261/18862 | 0.000122 | 0.000874 | 0.000575 | 22 |
| BP | GO:0045471 | 14/655 | 126/18862 | 0.000123 | 0.000883 | 0.000581 | 14 |
| BP | GO:0046660 | 13/655 | 111/18862 | 0.000125 | 0.000894 | 0.000588 | 13 |
| BP | GO:0044344 | 15/655 | 142/18862 | 0.000127 | 0.000907 | 0.000597 | 15 |
| BP | GO:0043550 | 10/655 | 69/18862  | 0.000127 | 0.000907 | 0.000597 | 10 |
| BP | GO:0034599 | 24/655 | 299/18862 | 0.00013  | 0.000926 | 0.000609 | 24 |
| BP | GO:0031099 | 18/655 | 192/18862 | 0.000133 | 0.00094  | 0.000618 | 18 |
| BP | GO:0048015 | 18/655 | 192/18862 | 0.000133 | 0.00094  | 0.000618 | 18 |
| BP | GO:0098581 | 6/655  | 24/18862  | 0.000135 | 0.000956 | 0.000629 | 6  |
| BP | GO:0002576 | 14/655 | 128/18862 | 0.000146 | 0.00103  | 0.000677 | 14 |
| BP | GO:0032479 | 14/655 | 128/18862 | 0.000146 | 0.00103  | 0.000677 | 14 |
| BP | GO:0045667 | 14/655 | 128/18862 | 0.000146 | 0.00103  | 0.000677 | 14 |
| BP | GO:0031214 | 16/655 | 160/18862 | 0.000147 | 0.001031 | 0.000678 | 16 |
| BP | GO:0031341 | 12/655 | 98/18862  | 0.000148 | 0.001036 | 0.000682 | 12 |
| BP | GO:0042063 | 23/655 | 283/18862 | 0.000149 | 0.001043 | 0.000686 | 23 |
| BP | GO:0030101 | 11/655 | 84/18862  | 0.000151 | 0.001059 | 0.000696 | 11 |
| BP | GO:0045346 | 5/655  | 16/18862  | 0.000158 | 0.001104 | 0.000726 | 5  |
| BP | GO:0032606 | 14/655 | 129/18862 | 0.000159 | 0.001109 | 0.000729 | 14 |
| BP | GO:0002763 | 9/655  | 58/18862  | 0.000162 | 0.001126 | 0.000741 | 9  |
| BP | GO:0019233 | 12/655 | 99/18862  | 0.000163 | 0.001132 | 0.000745 | 12 |
| BP | GO:0007409 | 32/655 | 460/18862 | 0.000164 | 0.001138 | 0.000748 | 32 |
| BP | GO:0110148 | 16/655 | 162/18862 | 0.000169 | 0.001176 | 0.000773 | 16 |
| BP | GO:0048872 | 21/655 | 249/18862 | 0.000171 | 0.001188 | 0.000781 | 21 |
| BP | GO:0043393 | 18/655 | 196/18862 | 0.000172 | 0.001188 | 0.000782 | 18 |
| BP | GO:0048017 | 18/655 | 196/18862 | 0.000172 | 0.001188 | 0.000782 | 18 |
| BP | GO:0048143 | 6/655  | 25/18862  | 0.000172 | 0.001188 | 0.000782 | 6  |
| BP | GO:0060259 | 6/655  | 25/18862  | 0.000172 | 0.001188 | 0.000782 | 6  |
| BP | GO:0006939 | 12/655 | 100/18862 | 0.000179 | 0.001232 | 0.00081  | 12 |
| BP | GO:0035924 | 10/655 | 72/18862  | 0.000183 | 0.001256 | 0.000826 | 10 |
| BP | GO:0048708 | 10/655 | 72/18862  | 0.000183 | 0.001256 | 0.000826 | 10 |
| BP | GO:0045428 | 9/655  | 59/18862  | 0.000185 | 0.001266 | 0.000833 | 9  |
| BP | GO:0051781 | 11/655 | 86/18862  | 0.000187 | 0.001277 | 0.00084  | 11 |
| BP | GO:0072073 | 14/655 | 131/18862 | 0.000187 | 0.001277 | 0.00084  | 14 |

|    |            |        |           |          |          |          |    |
|----|------------|--------|-----------|----------|----------|----------|----|
| BP | GO:0002823 | 8/655  | 47/18862  | 0.000192 | 0.001307 | 0.00086  | 8  |
| BP | GO:0009409 | 8/655  | 47/18862  | 0.000192 | 0.001307 | 0.00086  | 8  |
| BP | GO:1904707 | 8/655  | 47/18862  | 0.000192 | 0.001307 | 0.00086  | 8  |
| BP | GO:0006979 | 31/655 | 444/18862 | 0.000193 | 0.001312 | 0.000863 | 31 |
| BP | GO:0046425 | 12/655 | 101/18862 | 0.000197 | 0.001334 | 0.000877 | 12 |
| BP | GO:1902106 | 12/655 | 101/18862 | 0.000197 | 0.001334 | 0.000877 | 12 |
| BP | GO:0048608 | 29/655 | 405/18862 | 0.000202 | 0.001365 | 0.000898 | 29 |
| BP | GO:0003015 | 23/655 | 289/18862 | 0.000202 | 0.001366 | 0.000899 | 23 |
| BP | GO:0030879 | 14/655 | 132/18862 | 0.000203 | 0.001366 | 0.000899 | 14 |
| BP | GO:0042311 | 7/655  | 36/18862  | 0.000204 | 0.001376 | 0.000905 | 7  |
| BP | GO:0062197 | 26/655 | 347/18862 | 0.00021  | 0.001414 | 0.00093  | 26 |
| BP | GO:0045576 | 9/655  | 60/18862  | 0.000211 | 0.001415 | 0.000931 | 9  |
| BP | GO:0045927 | 21/655 | 253/18862 | 0.000213 | 0.00143  | 0.000941 | 21 |
| BP | GO:0034393 | 5/655  | 17/18862  | 0.000217 | 0.00145  | 0.000954 | 5  |
| BP | GO:0048670 | 5/655  | 17/18862  | 0.000217 | 0.00145  | 0.000954 | 5  |
| BP | GO:0090190 | 5/655  | 17/18862  | 0.000217 | 0.00145  | 0.000954 | 5  |
| BP | GO:1901623 | 6/655  | 26/18862  | 0.000218 | 0.001451 | 0.000954 | 6  |
| BP | GO:2001233 | 26/655 | 348/18862 | 0.00022  | 0.001464 | 0.000963 | 26 |
| BP | GO:0001913 | 8/655  | 48/18862  | 0.000224 | 0.00148  | 0.000974 | 8  |
| BP | GO:0030195 | 8/655  | 48/18862  | 0.000224 | 0.00148  | 0.000974 | 8  |
| BP | GO:0038084 | 8/655  | 48/18862  | 0.000224 | 0.00148  | 0.000974 | 8  |
| BP | GO:1904894 | 8/655  | 48/18862  | 0.000224 | 0.00148  | 0.000974 | 8  |
| BP | GO:0071695 | 19/655 | 218/18862 | 0.000227 | 0.001497 | 0.000985 | 19 |
| BP | GO:0061458 | 29/655 | 408/18862 | 0.000229 | 0.001509 | 0.000992 | 29 |
| BP | GO:0061045 | 10/655 | 74/18862  | 0.00023  | 0.001518 | 0.000999 | 10 |
| BP | GO:0048545 | 25/655 | 330/18862 | 0.000234 | 0.001537 | 0.001011 | 25 |
| BP | GO:0015908 | 15/655 | 150/18862 | 0.000234 | 0.001537 | 0.001011 | 15 |
| BP | GO:0032526 | 12/655 | 103/18862 | 0.000237 | 0.001557 | 0.001024 | 12 |
| BP | GO:0080164 | 9/655  | 61/18862  | 0.00024  | 0.001571 | 0.001033 | 9  |
| BP | GO:0090218 | 7/655  | 37/18862  | 0.000245 | 0.001599 | 0.001051 | 7  |
| BP | GO:2000403 | 7/655  | 37/18862  | 0.000245 | 0.001599 | 0.001051 | 7  |
| BP | GO:0051208 | 13/655 | 119/18862 | 0.000253 | 0.001649 | 0.001085 | 13 |
| BP | GO:0001660 | 4/655  | 10/18862  | 0.000256 | 0.001658 | 0.001091 | 4  |
| BP | GO:0002024 | 4/655  | 10/18862  | 0.000256 | 0.001658 | 0.001091 | 4  |
| BP | GO:0003093 | 4/655  | 10/18862  | 0.000256 | 0.001658 | 0.001091 | 4  |
| BP | GO:0032754 | 4/655  | 10/18862  | 0.000256 | 0.001658 | 0.001091 | 4  |
| BP | GO:0040015 | 4/655  | 10/18862  | 0.000256 | 0.001658 | 0.001091 | 4  |
| BP | GO:0046638 | 8/655  | 49/18862  | 0.000259 | 0.001673 | 0.001101 | 8  |
| BP | GO:0060043 | 8/655  | 49/18862  | 0.000259 | 0.001673 | 0.001101 | 8  |
| BP | GO:1900047 | 8/655  | 49/18862  | 0.000259 | 0.001673 | 0.001101 | 8  |
| BP | GO:0031960 | 15/655 | 152/18862 | 0.00027  | 0.001742 | 0.001146 | 15 |
| BP | GO:0002675 | 6/655  | 27/18862  | 0.000272 | 0.001748 | 0.00115  | 6  |
| BP | GO:0048732 | 29/655 | 413/18862 | 0.00028  | 0.0018   | 0.001184 | 29 |
| BP | GO:0044706 | 18/655 | 204/18862 | 0.000282 | 0.001812 | 0.001192 | 18 |
| BP | GO:0001914 | 7/655  | 38/18862  | 0.000291 | 0.001858 | 0.001222 | 7  |
| BP | GO:0009595 | 7/655  | 38/18862  | 0.000291 | 0.001858 | 0.001222 | 7  |
| BP | GO:0001991 | 5/655  | 18/18862  | 0.000292 | 0.001858 | 0.001222 | 5  |
| BP | GO:0002281 | 5/655  | 18/18862  | 0.000292 | 0.001858 | 0.001222 | 5  |
| BP | GO:0006957 | 5/655  | 18/18862  | 0.000292 | 0.001858 | 0.001222 | 5  |



|    |            |        |           |          |          |          |    |
|----|------------|--------|-----------|----------|----------|----------|----|
| BP | GO:0032740 | 5/655  | 18/18862  | 0.000292 | 0.001858 | 0.001222 | 5  |
| BP | GO:2000831 | 5/655  | 18/18862  | 0.000292 | 0.001858 | 0.001222 | 5  |
| BP | GO:0030183 | 14/655 | 137/18862 | 0.000299 | 0.001896 | 0.001247 | 14 |
| BP | GO:0048260 | 8/655  | 50/18862  | 0.0003   | 0.001896 | 0.001247 | 8  |
| BP | GO:1904036 | 8/655  | 50/18862  | 0.0003   | 0.001896 | 0.001247 | 8  |
| BP | GO:0031343 | 9/655  | 63/18862  | 0.000308 | 0.001945 | 0.001279 | 9  |
| BP | GO:0060047 | 22/655 | 279/18862 | 0.000314 | 0.001982 | 0.001304 | 22 |
| BP | GO:0032481 | 10/655 | 77/18862  | 0.000321 | 0.002018 | 0.001327 | 10 |
| BP | GO:0034121 | 10/655 | 77/18862  | 0.000321 | 0.002018 | 0.001327 | 10 |
| BP | GO:0007254 | 17/655 | 189/18862 | 0.00033  | 0.002075 | 0.001364 | 17 |
| BP | GO:1901655 | 11/655 | 92/18862  | 0.000341 | 0.002139 | 0.001406 | 11 |
| BP | GO:0007190 | 7/655  | 39/18862  | 0.000344 | 0.002146 | 0.001411 | 7  |
| BP | GO:0030501 | 7/655  | 39/18862  | 0.000344 | 0.002146 | 0.001411 | 7  |
| BP | GO:0050832 | 7/655  | 39/18862  | 0.000344 | 0.002146 | 0.001411 | 7  |
| BP | GO:0043370 | 8/655  | 51/18862  | 0.000345 | 0.002146 | 0.001411 | 8  |
| BP | GO:0071715 | 8/655  | 51/18862  | 0.000345 | 0.002146 | 0.001411 | 8  |
| BP | GO:1904645 | 8/655  | 51/18862  | 0.000345 | 0.002146 | 0.001411 | 8  |
| BP | GO:0042093 | 9/655  | 64/18862  | 0.000347 | 0.002157 | 0.001419 | 9  |
| BP | GO:0072577 | 9/655  | 64/18862  | 0.000347 | 0.002157 | 0.001419 | 9  |
| BP | GO:0008016 | 20/655 | 245/18862 | 0.000372 | 0.002305 | 0.001516 | 20 |
| BP | GO:0008585 | 11/655 | 93/18862  | 0.000375 | 0.002317 | 0.001524 | 11 |
| BP | GO:0051591 | 11/655 | 93/18862  | 0.000375 | 0.002317 | 0.001524 | 11 |
| BP | GO:0002689 | 5/655  | 19/18862  | 0.000386 | 0.002376 | 0.001562 | 5  |
| BP | GO:0010744 | 5/655  | 19/18862  | 0.000386 | 0.002376 | 0.001562 | 5  |
| BP | GO:0098543 | 5/655  | 19/18862  | 0.000386 | 0.002376 | 0.001562 | 5  |
| BP | GO:0050795 | 9/655  | 65/18862  | 0.000391 | 0.002395 | 0.001575 | 9  |
| BP | GO:0008228 | 4/655  | 11/18862  | 0.000391 | 0.002395 | 0.001575 | 4  |
| BP | GO:0033212 | 4/655  | 11/18862  | 0.000391 | 0.002395 | 0.001575 | 4  |
| BP | GO:0033690 | 4/655  | 11/18862  | 0.000391 | 0.002395 | 0.001575 | 4  |
| BP | GO:0034975 | 4/655  | 11/18862  | 0.000391 | 0.002395 | 0.001575 | 4  |
| BP | GO:0002820 | 8/655  | 52/18862  | 0.000395 | 0.002412 | 0.001586 | 8  |
| BP | GO:0050819 | 8/655  | 52/18862  | 0.000395 | 0.002412 | 0.001586 | 8  |
| BP | GO:0030890 | 7/655  | 40/18862  | 0.000405 | 0.002466 | 0.001622 | 7  |
| BP | GO:0051281 | 7/655  | 40/18862  | 0.000405 | 0.002466 | 0.001622 | 7  |
| BP | GO:0061036 | 6/655  | 29/18862  | 0.000411 | 0.002497 | 0.001642 | 6  |
| BP | GO:1904035 | 11/655 | 94/18862  | 0.000411 | 0.002497 | 0.001642 | 11 |
| BP | GO:0061035 | 9/655  | 66/18862  | 0.000439 | 0.002659 | 0.001749 | 9  |
| BP | GO:0072678 | 9/655  | 66/18862  | 0.000439 | 0.002659 | 0.001749 | 9  |
| BP | GO:2001235 | 13/655 | 126/18862 | 0.000443 | 0.002681 | 0.001763 | 13 |
| BP | GO:2000116 | 19/655 | 230/18862 | 0.000445 | 0.002691 | 0.00177  | 19 |
| BP | GO:0003179 | 8/655  | 53/18862  | 0.000451 | 0.00272  | 0.001789 | 8  |
| BP | GO:0010524 | 8/655  | 53/18862  | 0.000451 | 0.00272  | 0.001789 | 8  |
| BP | GO:0007565 | 16/655 | 177/18862 | 0.000463 | 0.002785 | 0.001832 | 16 |
| BP | GO:0022612 | 12/655 | 111/18862 | 0.000476 | 0.002861 | 0.001882 | 12 |
| BP | GO:0050672 | 10/655 | 81/18862  | 0.000485 | 0.002911 | 0.001915 | 10 |
| BP | GO:0014074 | 14/655 | 144/18862 | 0.000498 | 0.00296  | 0.001947 | 14 |
| BP | GO:0045577 | 6/655  | 30/18862  | 0.000499 | 0.00296  | 0.001947 | 6  |
| BP | GO:0061384 | 6/655  | 30/18862  | 0.000499 | 0.00296  | 0.001947 | 6  |
| BP | GO:0110110 | 6/655  | 30/18862  | 0.000499 | 0.00296  | 0.001947 | 6  |

|    |            |        |           |          |          |          |    |
|----|------------|--------|-----------|----------|----------|----------|----|
| BP | GO:0007252 | 5/655  | 20/18862  | 0.0005   | 0.00296  | 0.001947 | 5  |
| BP | GO:0032816 | 5/655  | 20/18862  | 0.0005   | 0.00296  | 0.001947 | 5  |
| BP | GO:0070233 | 5/655  | 20/18862  | 0.0005   | 0.00296  | 0.001947 | 5  |
| BP | GO:0090026 | 5/655  | 20/18862  | 0.0005   | 0.00296  | 0.001947 | 5  |
| BP | GO:0090189 | 5/655  | 20/18862  | 0.0005   | 0.00296  | 0.001947 | 5  |
| BP | GO:0090280 | 5/655  | 20/18862  | 0.0005   | 0.00296  | 0.001947 | 5  |
| BP | GO:0002791 | 23/655 | 308/18862 | 0.000501 | 0.002967 | 0.001951 | 23 |
| BP | GO:0010975 | 29/655 | 428/18862 | 0.000502 | 0.002967 | 0.001951 | 29 |
| BP | GO:0002043 | 8/655  | 54/18862  | 0.000514 | 0.003031 | 0.001993 | 8  |
| BP | GO:0055078 | 8/655  | 54/18862  | 0.000514 | 0.003031 | 0.001993 | 8  |
| BP | GO:0051209 | 12/655 | 112/18862 | 0.000517 | 0.003043 | 0.002001 | 12 |
| BP | GO:0032945 | 10/655 | 82/18862  | 0.000536 | 0.00315  | 0.002071 | 10 |
| BP | GO:0046545 | 11/655 | 97/18862  | 0.000539 | 0.003164 | 0.002081 | 11 |
| BP | GO:0060191 | 11/655 | 97/18862  | 0.000539 | 0.003164 | 0.002081 | 11 |
| BP | GO:0032965 | 7/655  | 42/18862  | 0.000552 | 0.003229 | 0.002124 | 7  |
| BP | GO:0043114 | 7/655  | 42/18862  | 0.000552 | 0.003229 | 0.002124 | 7  |
| BP | GO:0001909 | 12/655 | 113/18862 | 0.00056  | 0.003266 | 0.002148 | 12 |
| BP | GO:0008543 | 12/655 | 113/18862 | 0.00056  | 0.003266 | 0.002148 | 12 |
| BP | GO:0051283 | 12/655 | 113/18862 | 0.00056  | 0.003266 | 0.002148 | 12 |
| BP | GO:0010455 | 4/655  | 12/18862  | 0.000571 | 0.003311 | 0.002178 | 4  |
| BP | GO:0044650 | 4/655  | 12/18862  | 0.000571 | 0.003311 | 0.002178 | 4  |
| BP | GO:0044849 | 4/655  | 12/18862  | 0.000571 | 0.003311 | 0.002178 | 4  |
| BP | GO:0061469 | 4/655  | 12/18862  | 0.000571 | 0.003311 | 0.002178 | 4  |
| BP | GO:0014706 | 25/655 | 351/18862 | 0.000587 | 0.003398 | 0.002235 | 25 |
| BP | GO:0045069 | 10/655 | 83/18862  | 0.00059  | 0.003416 | 0.002247 | 10 |
| BP | GO:0019835 | 6/655  | 31/18862  | 0.000601 | 0.003463 | 0.002278 | 6  |
| BP | GO:0034390 | 6/655  | 31/18862  | 0.000601 | 0.003463 | 0.002278 | 6  |
| BP | GO:0034391 | 6/655  | 31/18862  | 0.000601 | 0.003463 | 0.002278 | 6  |
| BP | GO:0006936 | 25/655 | 352/18862 | 0.000611 | 0.00352  | 0.002315 | 25 |
| BP | GO:0010952 | 17/655 | 200/18862 | 0.000634 | 0.003636 | 0.002392 | 17 |
| BP | GO:0001759 | 5/655  | 21/18862  | 0.000637 | 0.003636 | 0.002392 | 5  |
| BP | GO:0035809 | 5/655  | 21/18862  | 0.000637 | 0.003636 | 0.002392 | 5  |
| BP | GO:0035929 | 5/655  | 21/18862  | 0.000637 | 0.003636 | 0.002392 | 5  |
| BP | GO:0046641 | 5/655  | 21/18862  | 0.000637 | 0.003636 | 0.002392 | 5  |
| BP | GO:1903429 | 5/655  | 21/18862  | 0.000637 | 0.003636 | 0.002392 | 5  |
| BP | GO:1905209 | 5/655  | 21/18862  | 0.000637 | 0.003636 | 0.002392 | 5  |
| BP | GO:1903426 | 11/655 | 99/18862  | 0.000642 | 0.003661 | 0.002408 | 11 |
| BP | GO:0051346 | 30/655 | 456/18862 | 0.000656 | 0.00373  | 0.002453 | 30 |
| BP | GO:1903900 | 14/655 | 148/18862 | 0.000656 | 0.00373  | 0.002453 | 14 |
| BP | GO:0051282 | 12/655 | 115/18862 | 0.000657 | 0.00373  | 0.002453 | 12 |
| BP | GO:0043388 | 8/655  | 56/18862  | 0.00066  | 0.003747 | 0.002464 | 8  |
| BP | GO:0006879 | 9/655  | 70/18862  | 0.000682 | 0.00386  | 0.002539 | 9  |
| BP | GO:0010517 | 9/655  | 70/18862  | 0.000682 | 0.00386  | 0.002539 | 9  |
| BP | GO:0002832 | 11/655 | 100/18862 | 0.000699 | 0.003954 | 0.0026   | 11 |
| BP | GO:0002861 | 6/655  | 32/18862  | 0.000718 | 0.004039 | 0.002656 | 6  |
| BP | GO:0010661 | 6/655  | 32/18862  | 0.000718 | 0.004039 | 0.002656 | 6  |
| BP | GO:0043372 | 6/655  | 32/18862  | 0.000718 | 0.004039 | 0.002656 | 6  |
| BP | GO:0051385 | 6/655  | 32/18862  | 0.000718 | 0.004039 | 0.002656 | 6  |
| BP | GO:0045444 | 18/655 | 221/18862 | 0.000736 | 0.004134 | 0.002719 | 18 |

|    |            |        |           |          |          |          |    |
|----|------------|--------|-----------|----------|----------|----------|----|
| BP | GO:0150076 | 7/655  | 44/18862  | 0.000738 | 0.004143 | 0.002725 | 7  |
| BP | GO:0031295 | 8/655  | 57/18862  | 0.000745 | 0.004172 | 0.002744 | 8  |
| BP | GO:0032757 | 8/655  | 57/18862  | 0.000745 | 0.004172 | 0.002744 | 8  |
| BP | GO:0051216 | 16/655 | 185/18862 | 0.000751 | 0.004198 | 0.002761 | 16 |
| BP | GO:0070227 | 9/655  | 71/18862  | 0.000757 | 0.004231 | 0.002782 | 9  |
| BP | GO:0097553 | 13/655 | 134/18862 | 0.000798 | 0.004395 | 0.00289  | 13 |
| BP | GO:0003205 | 14/655 | 151/18862 | 0.000801 | 0.004395 | 0.00289  | 14 |
| BP | GO:2001056 | 14/655 | 151/18862 | 0.000801 | 0.004395 | 0.00289  | 14 |
| BP | GO:0032727 | 5/655  | 22/18862  | 0.000801 | 0.004395 | 0.00289  | 5  |
| BP | GO:0055093 | 5/655  | 22/18862  | 0.000801 | 0.004395 | 0.00289  | 5  |
| BP | GO:0060343 | 5/655  | 22/18862  | 0.000801 | 0.004395 | 0.00289  | 5  |
| BP | GO:1904996 | 5/655  | 22/18862  | 0.000801 | 0.004395 | 0.00289  | 5  |
| BP | GO:0010745 | 4/655  | 13/18862  | 0.000802 | 0.004395 | 0.00289  | 4  |
| BP | GO:0016264 | 4/655  | 13/18862  | 0.000802 | 0.004395 | 0.00289  | 4  |
| BP | GO:0032725 | 4/655  | 13/18862  | 0.000802 | 0.004395 | 0.00289  | 4  |
| BP | GO:0033605 | 4/655  | 13/18862  | 0.000802 | 0.004395 | 0.00289  | 4  |
| BP | GO:0035810 | 4/655  | 13/18862  | 0.000802 | 0.004395 | 0.00289  | 4  |
| BP | GO:0060100 | 4/655  | 13/18862  | 0.000802 | 0.004395 | 0.00289  | 4  |
| BP | GO:0060732 | 4/655  | 13/18862  | 0.000802 | 0.004395 | 0.00289  | 4  |
| BP | GO:1903236 | 4/655  | 13/18862  | 0.000802 | 0.004395 | 0.00289  | 4  |
| BP | GO:1905155 | 4/655  | 13/18862  | 0.000802 | 0.004395 | 0.00289  | 4  |
| BP | GO:0031589 | 25/655 | 359/18862 | 0.000811 | 0.004441 | 0.002921 | 25 |
| BP | GO:0046620 | 11/655 | 102/18862 | 0.000827 | 0.00452  | 0.002972 | 11 |
| BP | GO:0060038 | 8/655  | 58/18862  | 0.000839 | 0.004574 | 0.003008 | 8  |
| BP | GO:2000351 | 8/655  | 58/18862  | 0.000839 | 0.004574 | 0.003008 | 8  |
| BP | GO:0014855 | 9/655  | 72/18862  | 0.000839 | 0.004574 | 0.003008 | 9  |
| BP | GO:0001974 | 7/655  | 45/18862  | 0.000848 | 0.004608 | 0.003031 | 7  |
| BP | GO:0014911 | 7/655  | 45/18862  | 0.000848 | 0.004608 | 0.003031 | 7  |
| BP | GO:1904062 | 24/655 | 340/18862 | 0.000849 | 0.004608 | 0.003031 | 24 |
| BP | GO:0045589 | 6/655  | 33/18862  | 0.000852 | 0.004609 | 0.003031 | 6  |
| BP | GO:0050869 | 6/655  | 33/18862  | 0.000852 | 0.004609 | 0.003031 | 6  |
| BP | GO:0051954 | 6/655  | 33/18862  | 0.000852 | 0.004609 | 0.003031 | 6  |
| BP | GO:0060402 | 14/655 | 152/18862 | 0.000854 | 0.004618 | 0.003037 | 14 |
| BP | GO:0061448 | 19/655 | 243/18862 | 0.00087  | 0.004692 | 0.003086 | 19 |
| BP | GO:0090257 | 19/655 | 243/18862 | 0.00087  | 0.004692 | 0.003086 | 19 |
| BP | GO:0051099 | 15/655 | 170/18862 | 0.000884 | 0.004763 | 0.003133 | 15 |
| BP | GO:0002758 | 12/655 | 119/18862 | 0.000891 | 0.004794 | 0.003153 | 12 |
| BP | GO:0030001 | 31/655 | 486/18862 | 0.000892 | 0.004794 | 0.003153 | 31 |
| BP | GO:0002062 | 11/655 | 103/18862 | 0.000897 | 0.004815 | 0.003166 | 11 |
| BP | GO:0006940 | 8/655  | 59/18862  | 0.000941 | 0.005039 | 0.003314 | 8  |
| BP | GO:0031294 | 8/655  | 59/18862  | 0.000941 | 0.005039 | 0.003314 | 8  |
| BP | GO:0046777 | 18/655 | 226/18862 | 0.000953 | 0.005098 | 0.003353 | 18 |
| BP | GO:0003158 | 13/655 | 137/18862 | 0.000981 | 0.005241 | 0.003447 | 13 |
| BP | GO:0003181 | 5/655  | 23/18862  | 0.000995 | 0.005295 | 0.003482 | 5  |
| BP | GO:0048668 | 5/655  | 23/18862  | 0.000995 | 0.005295 | 0.003482 | 5  |
| BP | GO:1902932 | 5/655  | 23/18862  | 0.000995 | 0.005295 | 0.003482 | 5  |
| BP | GO:0010092 | 6/655  | 34/18862  | 0.001004 | 0.005318 | 0.003497 | 6  |
| BP | GO:0010543 | 6/655  | 34/18862  | 0.001004 | 0.005318 | 0.003497 | 6  |
| BP | GO:0046640 | 6/655  | 34/18862  | 0.001004 | 0.005318 | 0.003497 | 6  |

|    |            |        |           |          |          |          |    |
|----|------------|--------|-----------|----------|----------|----------|----|
| BP | GO:0070232 | 6/655  | 34/18862  | 0.001004 | 0.005318 | 0.003497 | 6  |
| BP | GO:2000352 | 6/655  | 34/18862  | 0.001004 | 0.005318 | 0.003497 | 6  |
| BP | GO:1903038 | 13/655 | 138/18862 | 0.00105  | 0.00555  | 0.00365  | 13 |
| BP | GO:0062207 | 11/655 | 105/18862 | 0.001053 | 0.005561 | 0.003658 | 11 |
| BP | GO:0060401 | 15/655 | 173/18862 | 0.001057 | 0.005579 | 0.003669 | 15 |
| BP | GO:0034349 | 4/655  | 14/18862  | 0.001092 | 0.005736 | 0.003773 | 4  |
| BP | GO:0038166 | 4/655  | 14/18862  | 0.001092 | 0.005736 | 0.003773 | 4  |
| BP | GO:0072540 | 4/655  | 14/18862  | 0.001092 | 0.005736 | 0.003773 | 4  |
| BP | GO:0010001 | 17/655 | 210/18862 | 0.001092 | 0.005736 | 0.003773 | 17 |
| BP | GO:0010712 | 7/655  | 47/18862  | 0.001107 | 0.005785 | 0.003804 | 7  |
| BP | GO:0030225 | 7/655  | 47/18862  | 0.001107 | 0.005785 | 0.003804 | 7  |
| BP | GO:0070169 | 7/655  | 47/18862  | 0.001107 | 0.005785 | 0.003804 | 7  |
| BP | GO:1903053 | 7/655  | 47/18862  | 0.001107 | 0.005785 | 0.003804 | 7  |
| BP | GO:0045862 | 25/655 | 367/18862 | 0.001108 | 0.005785 | 0.003804 | 25 |
| BP | GO:0007218 | 11/655 | 106/18862 | 0.001139 | 0.005941 | 0.003907 | 11 |
| BP | GO:0021700 | 20/655 | 268/18862 | 0.001145 | 0.005969 | 0.003926 | 20 |
| BP | GO:0051402 | 18/655 | 230/18862 | 0.001165 | 0.006062 | 0.003987 | 18 |
| BP | GO:0032970 | 26/655 | 389/18862 | 0.001169 | 0.006079 | 0.003998 | 26 |
| BP | GO:0003170 | 8/655  | 61/18862  | 0.001176 | 0.006094 | 0.004008 | 8  |
| BP | GO:0048645 | 8/655  | 61/18862  | 0.001176 | 0.006094 | 0.004008 | 8  |
| BP | GO:0060338 | 6/655  | 35/18862  | 0.001177 | 0.006094 | 0.004008 | 6  |
| BP | GO:1905207 | 6/655  | 35/18862  | 0.001177 | 0.006094 | 0.004008 | 6  |
| BP | GO:0060348 | 16/655 | 193/18862 | 0.001179 | 0.006096 | 0.004009 | 16 |
| BP | GO:0060333 | 10/655 | 91/18862  | 0.001218 | 0.006284 | 0.004133 | 10 |
| BP | GO:0002407 | 5/655  | 24/18862  | 0.001221 | 0.006284 | 0.004133 | 5  |
| BP | GO:0044321 | 5/655  | 24/18862  | 0.001221 | 0.006284 | 0.004133 | 5  |
| BP | GO:1903901 | 5/655  | 24/18862  | 0.001221 | 0.006284 | 0.004133 | 5  |
| BP | GO:2000278 | 11/655 | 107/18862 | 0.00123  | 0.006327 | 0.004161 | 11 |
| BP | GO:0030500 | 9/655  | 76/18862  | 0.001243 | 0.006378 | 0.004195 | 9  |
| BP | GO:0051279 | 9/655  | 76/18862  | 0.001243 | 0.006378 | 0.004195 | 9  |
| BP | GO:0006692 | 7/655  | 48/18862  | 0.001258 | 0.006428 | 0.004228 | 7  |
| BP | GO:0006693 | 7/655  | 48/18862  | 0.001258 | 0.006428 | 0.004228 | 7  |
| BP | GO:0052372 | 7/655  | 48/18862  | 0.001258 | 0.006428 | 0.004228 | 7  |
| BP | GO:0110151 | 7/655  | 48/18862  | 0.001258 | 0.006428 | 0.004228 | 7  |
| BP | GO:0060537 | 25/655 | 371/18862 | 0.001288 | 0.006572 | 0.004323 | 25 |
| BP | GO:0034614 | 14/655 | 159/18862 | 0.001323 | 0.006744 | 0.004435 | 14 |
| BP | GO:0010038 | 24/655 | 352/18862 | 0.001363 | 0.006933 | 0.00456  | 24 |
| BP | GO:0032956 | 24/655 | 352/18862 | 0.001363 | 0.006933 | 0.00456  | 24 |
| BP | GO:0003176 | 6/655  | 36/18862  | 0.001372 | 0.006954 | 0.004573 | 6  |
| BP | GO:0045066 | 6/655  | 36/18862  | 0.001372 | 0.006954 | 0.004573 | 6  |
| BP | GO:0051930 | 6/655  | 36/18862  | 0.001372 | 0.006954 | 0.004573 | 6  |
| BP | GO:0070231 | 7/655  | 49/18862  | 0.001425 | 0.007215 | 0.004745 | 7  |
| BP | GO:0001977 | 4/655  | 15/18862  | 0.001448 | 0.007272 | 0.004782 | 4  |
| BP | GO:0010919 | 4/655  | 15/18862  | 0.001448 | 0.007272 | 0.004782 | 4  |
| BP | GO:0032645 | 4/655  | 15/18862  | 0.001448 | 0.007272 | 0.004782 | 4  |
| BP | GO:0035635 | 4/655  | 15/18862  | 0.001448 | 0.007272 | 0.004782 | 4  |
| BP | GO:0042976 | 4/655  | 15/18862  | 0.001448 | 0.007272 | 0.004782 | 4  |
| BP | GO:0060099 | 4/655  | 15/18862  | 0.001448 | 0.007272 | 0.004782 | 4  |
| BP | GO:0071380 | 4/655  | 15/18862  | 0.001448 | 0.007272 | 0.004782 | 4  |

|    |            |        |           |          |          |          |    |
|----|------------|--------|-----------|----------|----------|----------|----|
| BP | GO:2000846 | 4/655  | 15/18862  | 0.001448 | 0.007272 | 0.004782 | 4  |
| BP | GO:0014015 | 8/655  | 63/18862  | 0.001456 | 0.007294 | 0.004797 | 8  |
| BP | GO:2000401 | 8/655  | 63/18862  | 0.001456 | 0.007294 | 0.004797 | 8  |
| BP | GO:0043523 | 16/655 | 197/18862 | 0.001461 | 0.007311 | 0.004808 | 16 |
| BP | GO:0003171 | 5/655  | 25/18862  | 0.001483 | 0.007387 | 0.004859 | 5  |
| BP | GO:0021884 | 5/655  | 25/18862  | 0.001483 | 0.007387 | 0.004859 | 5  |
| BP | GO:0032682 | 5/655  | 25/18862  | 0.001483 | 0.007387 | 0.004859 | 5  |
| BP | GO:1990776 | 5/655  | 25/18862  | 0.001483 | 0.007387 | 0.004859 | 5  |
| BP | GO:0071241 | 17/655 | 216/18862 | 0.001484 | 0.007387 | 0.004859 | 17 |
| BP | GO:0006937 | 14/655 | 161/18862 | 0.001491 | 0.007406 | 0.00487  | 14 |
| BP | GO:0030307 | 14/655 | 161/18862 | 0.001491 | 0.007406 | 0.00487  | 14 |
| BP | GO:0030522 | 20/655 | 274/18862 | 0.001496 | 0.00741  | 0.004874 | 20 |
| BP | GO:0001570 | 9/655  | 78/18862  | 0.001497 | 0.00741  | 0.004874 | 9  |
| BP | GO:0045913 | 9/655  | 78/18862  | 0.001497 | 0.00741  | 0.004874 | 9  |
| BP | GO:0051341 | 11/655 | 110/18862 | 0.001542 | 0.007628 | 0.005017 | 11 |
| BP | GO:0035051 | 13/655 | 144/18862 | 0.00155  | 0.007657 | 0.005036 | 13 |
| BP | GO:0015837 | 10/655 | 94/18862  | 0.001562 | 0.0077   | 0.005064 | 10 |
| BP | GO:0070167 | 10/655 | 94/18862  | 0.001562 | 0.0077   | 0.005064 | 10 |
| BP | GO:0046633 | 6/655  | 37/18862  | 0.00159  | 0.007813 | 0.005139 | 6  |
| BP | GO:0051931 | 6/655  | 37/18862  | 0.00159  | 0.007813 | 0.005139 | 6  |
| BP | GO:0060412 | 6/655  | 37/18862  | 0.00159  | 0.007813 | 0.005139 | 6  |
| BP | GO:0003281 | 8/655  | 64/18862  | 0.001614 | 0.007925 | 0.005212 | 8  |
| BP | GO:0001910 | 9/655  | 79/18862  | 0.001638 | 0.008028 | 0.00528  | 9  |
| BP | GO:0042445 | 17/655 | 218/18862 | 0.001639 | 0.008028 | 0.00528  | 17 |
| BP | GO:0030900 | 24/655 | 357/18862 | 0.001646 | 0.008057 | 0.005299 | 24 |
| BP | GO:0002262 | 13/655 | 145/18862 | 0.00165  | 0.008066 | 0.005305 | 13 |
| BP | GO:0030324 | 14/655 | 163/18862 | 0.001676 | 0.008183 | 0.005382 | 14 |
| BP | GO:0010466 | 19/655 | 257/18862 | 0.001677 | 0.008183 | 0.005382 | 19 |
| BP | GO:0010522 | 10/655 | 95/18862  | 0.001693 | 0.008249 | 0.005425 | 10 |
| BP | GO:0010950 | 15/655 | 182/18862 | 0.001756 | 0.008551 | 0.005624 | 15 |
| BP | GO:0002026 | 5/655  | 26/18862  | 0.001784 | 0.008658 | 0.005694 | 5  |
| BP | GO:0003156 | 5/655  | 26/18862  | 0.001784 | 0.008658 | 0.005694 | 5  |
| BP | GO:0061082 | 5/655  | 26/18862  | 0.001784 | 0.008658 | 0.005694 | 5  |
| BP | GO:0010660 | 9/655  | 80/18862  | 0.00179  | 0.00868  | 0.005709 | 9  |
| BP | GO:0019079 | 12/655 | 129/18862 | 0.001797 | 0.008705 | 0.005725 | 12 |
| BP | GO:0006636 | 7/655  | 51/18862  | 0.001809 | 0.008743 | 0.00575  | 7  |
| BP | GO:0032964 | 7/655  | 51/18862  | 0.001809 | 0.008743 | 0.00575  | 7  |
| BP | GO:0003279 | 10/655 | 96/18862  | 0.001832 | 0.008806 | 0.005791 | 10 |
| BP | GO:0110149 | 10/655 | 96/18862  | 0.001832 | 0.008806 | 0.005791 | 10 |
| BP | GO:0002714 | 6/655  | 38/18862  | 0.001833 | 0.008806 | 0.005791 | 6  |
| BP | GO:0002891 | 6/655  | 38/18862  | 0.001833 | 0.008806 | 0.005791 | 6  |
| BP | GO:0045429 | 6/655  | 38/18862  | 0.001833 | 0.008806 | 0.005791 | 6  |
| BP | GO:2000249 | 6/655  | 38/18862  | 0.001833 | 0.008806 | 0.005791 | 6  |
| BP | GO:0060249 | 29/655 | 466/18862 | 0.001867 | 0.008941 | 0.00588  | 29 |
| BP | GO:0032604 | 4/655  | 16/18862  | 0.001879 | 0.008941 | 0.00588  | 4  |
| BP | GO:0035930 | 4/655  | 16/18862  | 0.001879 | 0.008941 | 0.00588  | 4  |
| BP | GO:0044546 | 4/655  | 16/18862  | 0.001879 | 0.008941 | 0.00588  | 4  |
| BP | GO:0060263 | 4/655  | 16/18862  | 0.001879 | 0.008941 | 0.00588  | 4  |
| BP | GO:0061081 | 4/655  | 16/18862  | 0.001879 | 0.008941 | 0.00588  | 4  |

|    |            |        |           |          |          |          |    |
|----|------------|--------|-----------|----------|----------|----------|----|
| BP | GO:0071361 | 4/655  | 16/18862  | 0.001879 | 0.008941 | 0.00588  | 4  |
| BP | GO:1900747 | 4/655  | 16/18862  | 0.001879 | 0.008941 | 0.00588  | 4  |
| BP | GO:1905153 | 4/655  | 16/18862  | 0.001879 | 0.008941 | 0.00588  | 4  |
| BP | GO:0009743 | 17/655 | 221/18862 | 0.001896 | 0.009014 | 0.005928 | 17 |
| BP | GO:0046683 | 12/655 | 130/18862 | 0.001919 | 0.009115 | 0.005995 | 12 |
| BP | GO:0014910 | 9/655  | 81/18862  | 0.001953 | 0.009269 | 0.006096 | 9  |
| BP | GO:0001933 | 24/655 | 362/18862 | 0.001978 | 0.009366 | 0.00616  | 24 |
| BP | GO:0042692 | 24/655 | 362/18862 | 0.001978 | 0.009366 | 0.00616  | 24 |
| BP | GO:0001658 | 7/655  | 52/18862  | 0.002029 | 0.009588 | 0.006305 | 7  |
| BP | GO:0050433 | 7/655  | 52/18862  | 0.002029 | 0.009588 | 0.006305 | 7  |
| BP | GO:0055007 | 11/655 | 114/18862 | 0.002056 | 0.009706 | 0.006383 | 11 |
| BP | GO:0007548 | 19/655 | 262/18862 | 0.002089 | 0.009852 | 0.006479 | 19 |
| BP | GO:0045622 | 6/655  | 39/18862  | 0.002104 | 0.009864 | 0.006488 | 6  |
| BP | GO:0045742 | 6/655  | 39/18862  | 0.002104 | 0.009864 | 0.006488 | 6  |
| BP | GO:0045773 | 6/655  | 39/18862  | 0.002104 | 0.009864 | 0.006488 | 6  |
| BP | GO:1904407 | 6/655  | 39/18862  | 0.002104 | 0.009864 | 0.006488 | 6  |
| BP | GO:2000279 | 6/655  | 39/18862  | 0.002104 | 0.009864 | 0.006488 | 6  |
| BP | GO:0030323 | 14/655 | 167/18862 | 0.002104 | 0.009864 | 0.006488 | 14 |
| BP | GO:0002360 | 5/655  | 27/18862  | 0.002128 | 0.009933 | 0.006533 | 5  |
| BP | GO:0007263 | 5/655  | 27/18862  | 0.002128 | 0.009933 | 0.006533 | 5  |
| BP | GO:0032958 | 5/655  | 27/18862  | 0.002128 | 0.009933 | 0.006533 | 5  |
| BP | GO:0045987 | 5/655  | 27/18862  | 0.002128 | 0.009933 | 0.006533 | 5  |
| BP | GO:0045669 | 8/655  | 67/18862  | 0.002172 | 0.010132 | 0.006664 | 8  |
| BP | GO:0043281 | 16/655 | 205/18862 | 0.002197 | 0.010237 | 0.006732 | 16 |
| BP | GO:0002090 | 7/655  | 53/18862  | 0.002269 | 0.01054  | 0.006932 | 7  |
| BP | GO:0002704 | 7/655  | 53/18862  | 0.002269 | 0.01054  | 0.006932 | 7  |
| BP | GO:0050432 | 7/655  | 53/18862  | 0.002269 | 0.01054  | 0.006932 | 7  |
| BP | GO:0022600 | 10/655 | 99/18862  | 0.002307 | 0.010706 | 0.007041 | 10 |
| BP | GO:0001946 | 4/655  | 17/18862  | 0.00239  | 0.010959 | 0.007208 | 4  |
| BP | GO:0002076 | 4/655  | 17/18862  | 0.00239  | 0.010959 | 0.007208 | 4  |
| BP | GO:0002295 | 4/655  | 17/18862  | 0.00239  | 0.010959 | 0.007208 | 4  |
| BP | GO:0002888 | 4/655  | 17/18862  | 0.00239  | 0.010959 | 0.007208 | 4  |
| BP | GO:0016045 | 4/655  | 17/18862  | 0.00239  | 0.010959 | 0.007208 | 4  |
| BP | GO:0030889 | 4/655  | 17/18862  | 0.00239  | 0.010959 | 0.007208 | 4  |
| BP | GO:0034374 | 4/655  | 17/18862  | 0.00239  | 0.010959 | 0.007208 | 4  |
| BP | GO:0043116 | 4/655  | 17/18862  | 0.00239  | 0.010959 | 0.007208 | 4  |
| BP | GO:0060457 | 4/655  | 17/18862  | 0.00239  | 0.010959 | 0.007208 | 4  |
| BP | GO:0060749 | 4/655  | 17/18862  | 0.00239  | 0.010959 | 0.007208 | 4  |
| BP | GO:0061377 | 4/655  | 17/18862  | 0.00239  | 0.010959 | 0.007208 | 4  |
| BP | GO:0150078 | 4/655  | 17/18862  | 0.00239  | 0.010959 | 0.007208 | 4  |
| BP | GO:0055023 | 6/655  | 40/18862  | 0.002404 | 0.011003 | 0.007236 | 6  |
| BP | GO:0060443 | 6/655  | 40/18862  | 0.002404 | 0.011003 | 0.007236 | 6  |
| BP | GO:0010469 | 15/655 | 188/18862 | 0.00241  | 0.011019 | 0.007247 | 15 |
| BP | GO:0010657 | 9/655  | 84/18862  | 0.002515 | 0.011454 | 0.007533 | 9  |
| BP | GO:0010039 | 5/655  | 28/18862  | 0.002517 | 0.011454 | 0.007533 | 5  |
| BP | GO:0021988 | 5/655  | 28/18862  | 0.002517 | 0.011454 | 0.007533 | 5  |
| BP | GO:0032607 | 5/655  | 28/18862  | 0.002517 | 0.011454 | 0.007533 | 5  |
| BP | GO:0032647 | 5/655  | 28/18862  | 0.002517 | 0.011454 | 0.007533 | 5  |
| BP | GO:0002712 | 7/655  | 54/18862  | 0.00253  | 0.01148  | 0.00755  | 7  |

|    |            |        |           |          |          |          |    |
|----|------------|--------|-----------|----------|----------|----------|----|
| BP | GO:0002889 | 7/655  | 54/18862  | 0.00253  | 0.01148  | 0.00755  | 7  |
| BP | GO:0070228 | 7/655  | 54/18862  | 0.00253  | 0.01148  | 0.00755  | 7  |
| BP | GO:0022408 | 15/655 | 189/18862 | 0.002536 | 0.011484 | 0.007553 | 15 |
| BP | GO:0071248 | 15/655 | 189/18862 | 0.002536 | 0.011484 | 0.007553 | 15 |
| BP | GO:0009266 | 17/655 | 228/18862 | 0.00263  | 0.011898 | 0.007825 | 17 |
| BP | GO:0043280 | 12/655 | 135/18862 | 0.002635 | 0.011907 | 0.007831 | 12 |
| BP | GO:0090276 | 16/655 | 209/18862 | 0.002668 | 0.012045 | 0.007922 | 16 |
| BP | GO:0002220 | 11/655 | 118/18862 | 0.002701 | 0.01217  | 0.008004 | 11 |
| BP | GO:0051101 | 11/655 | 118/18862 | 0.002701 | 0.01217  | 0.008004 | 11 |
| BP | GO:0019915 | 9/655  | 85/18862  | 0.002729 | 0.012253 | 0.008058 | 9  |
| BP | GO:0033003 | 6/655  | 41/18862  | 0.002735 | 0.012253 | 0.008058 | 6  |
| BP | GO:0090279 | 6/655  | 41/18862  | 0.002735 | 0.012253 | 0.008058 | 6  |
| BP | GO:1901186 | 6/655  | 41/18862  | 0.002735 | 0.012253 | 0.008058 | 6  |
| BP | GO:1904646 | 6/655  | 41/18862  | 0.002735 | 0.012253 | 0.008058 | 6  |
| BP | GO:1905314 | 6/655  | 41/18862  | 0.002735 | 0.012253 | 0.008058 | 6  |
| BP | GO:0007405 | 7/655  | 55/18862  | 0.002814 | 0.012585 | 0.008277 | 7  |
| BP | GO:0045620 | 7/655  | 55/18862  | 0.002814 | 0.012585 | 0.008277 | 7  |
| BP | GO:0051145 | 8/655  | 70/18862  | 0.002872 | 0.012818 | 0.00843  | 8  |
| BP | GO:1904427 | 8/655  | 70/18862  | 0.002872 | 0.012818 | 0.00843  | 8  |
| BP | GO:0045446 | 11/655 | 119/18862 | 0.002885 | 0.012864 | 0.00846  | 11 |
| BP | GO:0001773 | 5/655  | 29/18862  | 0.002956 | 0.013105 | 0.008619 | 5  |
| BP | GO:0036296 | 5/655  | 29/18862  | 0.002956 | 0.013105 | 0.008619 | 5  |
| BP | GO:0036336 | 5/655  | 29/18862  | 0.002956 | 0.013105 | 0.008619 | 5  |
| BP | GO:0045940 | 5/655  | 29/18862  | 0.002956 | 0.013105 | 0.008619 | 5  |
| BP | GO:0051952 | 9/655  | 86/18862  | 0.002956 | 0.013105 | 0.008619 | 9  |
| BP | GO:0055072 | 9/655  | 86/18862  | 0.002956 | 0.013105 | 0.008619 | 9  |
| BP | GO:0002523 | 4/655  | 18/18862  | 0.002989 | 0.013201 | 0.008682 | 4  |
| BP | GO:0010885 | 4/655  | 18/18862  | 0.002989 | 0.013201 | 0.008682 | 4  |
| BP | GO:0045063 | 4/655  | 18/18862  | 0.002989 | 0.013201 | 0.008682 | 4  |
| BP | GO:1902548 | 4/655  | 18/18862  | 0.002989 | 0.013201 | 0.008682 | 4  |
| BP | GO:0071453 | 17/655 | 231/18862 | 0.00301  | 0.013283 | 0.008736 | 17 |
| BP | GO:0071560 | 18/655 | 251/18862 | 0.003045 | 0.013425 | 0.008829 | 18 |
| BP | GO:0031532 | 10/655 | 103/18862 | 0.003089 | 0.013603 | 0.008946 | 10 |
| BP | GO:0003197 | 6/655  | 42/18862  | 0.003099 | 0.013621 | 0.008958 | 6  |
| BP | GO:0062208 | 6/655  | 42/18862  | 0.003099 | 0.013621 | 0.008958 | 6  |
| BP | GO:0010883 | 7/655  | 56/18862  | 0.003122 | 0.013698 | 0.009009 | 7  |
| BP | GO:0046456 | 7/655  | 56/18862  | 0.003122 | 0.013698 | 0.009009 | 7  |
| BP | GO:0043627 | 8/655  | 71/18862  | 0.003141 | 0.013766 | 0.009054 | 8  |
| BP | GO:0007586 | 12/655 | 138/18862 | 0.003159 | 0.013835 | 0.009099 | 12 |
| BP | GO:0043534 | 14/655 | 175/18862 | 0.003234 | 0.014149 | 0.009305 | 14 |
| BP | GO:0038111 | 5/655  | 30/18862  | 0.003447 | 0.015006 | 0.009869 | 5  |
| BP | GO:0042755 | 5/655  | 30/18862  | 0.003447 | 0.015006 | 0.009869 | 5  |
| BP | GO:0050901 | 5/655  | 30/18862  | 0.003447 | 0.015006 | 0.009869 | 5  |
| BP | GO:0090183 | 5/655  | 30/18862  | 0.003447 | 0.015006 | 0.009869 | 5  |
| BP | GO:2000406 | 5/655  | 30/18862  | 0.003447 | 0.015006 | 0.009869 | 5  |
| BP | GO:0002532 | 9/655  | 88/18862  | 0.003455 | 0.015006 | 0.009869 | 9  |
| BP | GO:0014909 | 9/655  | 88/18862  | 0.003455 | 0.015006 | 0.009869 | 9  |
| BP | GO:0060993 | 9/655  | 88/18862  | 0.003455 | 0.015006 | 0.009869 | 9  |
| BP | GO:0034142 | 6/655  | 43/18862  | 0.003497 | 0.015173 | 0.009979 | 6  |

|    |            |        |           |          |          |          |    |
|----|------------|--------|-----------|----------|----------|----------|----|
| BP | GO:0002544 | 4/655  | 19/18862  | 0.003683 | 0.015891 | 0.010451 | 4  |
| BP | GO:0010002 | 4/655  | 19/18862  | 0.003683 | 0.015891 | 0.010451 | 4  |
| BP | GO:0033005 | 4/655  | 19/18862  | 0.003683 | 0.015891 | 0.010451 | 4  |
| BP | GO:0043902 | 4/655  | 19/18862  | 0.003683 | 0.015891 | 0.010451 | 4  |
| BP | GO:0044320 | 4/655  | 19/18862  | 0.003683 | 0.015891 | 0.010451 | 4  |
| BP | GO:0045780 | 4/655  | 19/18862  | 0.003683 | 0.015891 | 0.010451 | 4  |
| BP | GO:0051147 | 13/655 | 159/18862 | 0.003707 | 0.01598  | 0.01051  | 13 |
| BP | GO:0042493 | 23/655 | 359/18862 | 0.003715 | 0.015998 | 0.010521 | 23 |
| BP | GO:0007173 | 11/655 | 123/18862 | 0.003726 | 0.016029 | 0.010542 | 11 |
| BP | GO:0042058 | 9/655  | 89/18862  | 0.003729 | 0.016029 | 0.010542 | 9  |
| BP | GO:0003151 | 8/655  | 73/18862  | 0.003736 | 0.016029 | 0.010542 | 8  |
| BP | GO:1903556 | 8/655  | 73/18862  | 0.003736 | 0.016029 | 0.010542 | 8  |
| BP | GO:1901222 | 10/655 | 106/18862 | 0.003803 | 0.016303 | 0.010722 | 10 |
| BP | GO:0060675 | 7/655  | 58/18862  | 0.003814 | 0.016334 | 0.010742 | 7  |
| BP | GO:0071559 | 18/655 | 257/18862 | 0.003907 | 0.016718 | 0.010995 | 18 |
| BP | GO:0060421 | 6/655  | 44/18862  | 0.003933 | 0.016798 | 0.011047 | 6  |
| BP | GO:0060976 | 6/655  | 44/18862  | 0.003933 | 0.016798 | 0.011047 | 6  |
| BP | GO:0070229 | 5/655  | 31/18862  | 0.003995 | 0.017046 | 0.011211 | 5  |
| BP | GO:0002524 | 3/655  | 10/18862  | 0.004167 | 0.017539 | 0.011535 | 3  |
| BP | GO:0003129 | 3/655  | 10/18862  | 0.004167 | 0.017539 | 0.011535 | 3  |
| BP | GO:0014041 | 3/655  | 10/18862  | 0.004167 | 0.017539 | 0.011535 | 3  |
| BP | GO:0031652 | 3/655  | 10/18862  | 0.004167 | 0.017539 | 0.011535 | 3  |
| BP | GO:0032817 | 3/655  | 10/18862  | 0.004167 | 0.017539 | 0.011535 | 3  |
| BP | GO:0034350 | 3/655  | 10/18862  | 0.004167 | 0.017539 | 0.011535 | 3  |
| BP | GO:0042045 | 3/655  | 10/18862  | 0.004167 | 0.017539 | 0.011535 | 3  |
| BP | GO:0043084 | 3/655  | 10/18862  | 0.004167 | 0.017539 | 0.011535 | 3  |
| BP | GO:0045625 | 3/655  | 10/18862  | 0.004167 | 0.017539 | 0.011535 | 3  |
| BP | GO:0048672 | 3/655  | 10/18862  | 0.004167 | 0.017539 | 0.011535 | 3  |
| BP | GO:0051712 | 3/655  | 10/18862  | 0.004167 | 0.017539 | 0.011535 | 3  |
| BP | GO:0060453 | 3/655  | 10/18862  | 0.004167 | 0.017539 | 0.011535 | 3  |
| BP | GO:0070391 | 3/655  | 10/18862  | 0.004167 | 0.017539 | 0.011535 | 3  |
| BP | GO:0071223 | 3/655  | 10/18862  | 0.004167 | 0.017539 | 0.011535 | 3  |
| BP | GO:2000318 | 3/655  | 10/18862  | 0.004167 | 0.017539 | 0.011535 | 3  |
| BP | GO:0072171 | 7/655  | 59/18862  | 0.004201 | 0.017666 | 0.011618 | 7  |
| BP | GO:0003007 | 17/655 | 239/18862 | 0.004253 | 0.017869 | 0.011752 | 17 |
| BP | GO:0099177 | 25/655 | 406/18862 | 0.004263 | 0.017898 | 0.011771 | 25 |
| BP | GO:0030510 | 9/655  | 91/18862  | 0.004326 | 0.018146 | 0.011934 | 9  |
| BP | GO:0042326 | 25/655 | 407/18862 | 0.004398 | 0.018431 | 0.012122 | 25 |
| BP | GO:0051495 | 16/655 | 220/18862 | 0.00441  | 0.018464 | 0.012143 | 16 |
| BP | GO:0043536 | 8/655  | 75/18862  | 0.004415 | 0.018466 | 0.012145 | 8  |
| BP | GO:0002029 | 4/655  | 20/18862  | 0.004479 | 0.018553 | 0.012202 | 4  |
| BP | GO:0002726 | 4/655  | 20/18862  | 0.004479 | 0.018553 | 0.012202 | 4  |
| BP | GO:0010878 | 4/655  | 20/18862  | 0.004479 | 0.018553 | 0.012202 | 4  |
| BP | GO:0022401 | 4/655  | 20/18862  | 0.004479 | 0.018553 | 0.012202 | 4  |
| BP | GO:0034104 | 4/655  | 20/18862  | 0.004479 | 0.018553 | 0.012202 | 4  |
| BP | GO:0043011 | 4/655  | 20/18862  | 0.004479 | 0.018553 | 0.012202 | 4  |
| BP | GO:0043373 | 4/655  | 20/18862  | 0.004479 | 0.018553 | 0.012202 | 4  |
| BP | GO:0043901 | 4/655  | 20/18862  | 0.004479 | 0.018553 | 0.012202 | 4  |
| BP | GO:0044342 | 4/655  | 20/18862  | 0.004479 | 0.018553 | 0.012202 | 4  |



|    |            |        |           |          |          |          |    |
|----|------------|--------|-----------|----------|----------|----------|----|
| BP | GO:0046597 | 4/655  | 20/18862  | 0.004479 | 0.018553 | 0.012202 | 4  |
| BP | GO:0140131 | 4/655  | 20/18862  | 0.004479 | 0.018553 | 0.012202 | 4  |
| BP | GO:0031128 | 5/655  | 32/18862  | 0.004602 | 0.018993 | 0.012491 | 5  |
| BP | GO:0035767 | 5/655  | 32/18862  | 0.004602 | 0.018993 | 0.012491 | 5  |
| BP | GO:0045648 | 5/655  | 32/18862  | 0.004602 | 0.018993 | 0.012491 | 5  |
| BP | GO:0098751 | 5/655  | 32/18862  | 0.004602 | 0.018993 | 0.012491 | 5  |
| BP | GO:0010518 | 7/655  | 60/18862  | 0.004616 | 0.019003 | 0.012498 | 7  |
| BP | GO:0040014 | 7/655  | 60/18862  | 0.004616 | 0.019003 | 0.012498 | 7  |
| BP | GO:0046888 | 7/655  | 60/18862  | 0.004616 | 0.019003 | 0.012498 | 7  |
| BP | GO:0045638 | 9/655  | 92/18862  | 0.004652 | 0.019133 | 0.012583 | 9  |
| BP | GO:0038127 | 12/655 | 145/18862 | 0.004715 | 0.019374 | 0.012742 | 12 |
| BP | GO:0071496 | 20/655 | 303/18862 | 0.004739 | 0.019458 | 0.012797 | 20 |
| BP | GO:0032409 | 19/655 | 283/18862 | 0.004865 | 0.019958 | 0.013126 | 19 |
| BP | GO:0101023 | 6/655  | 46/18862  | 0.004923 | 0.020159 | 0.013258 | 6  |
| BP | GO:1905562 | 6/655  | 46/18862  | 0.004923 | 0.020159 | 0.013258 | 6  |
| BP | GO:0051153 | 9/655  | 93/18862  | 0.004996 | 0.02044  | 0.013443 | 9  |
| BP | GO:0070542 | 7/655  | 61/18862  | 0.005062 | 0.020693 | 0.013609 | 7  |
| BP | GO:0003203 | 5/655  | 33/18862  | 0.005271 | 0.021378 | 0.01406  | 5  |
| BP | GO:0003298 | 5/655  | 33/18862  | 0.005271 | 0.021378 | 0.01406  | 5  |
| BP | GO:0003301 | 5/655  | 33/18862  | 0.005271 | 0.021378 | 0.01406  | 5  |
| BP | GO:0032941 | 5/655  | 33/18862  | 0.005271 | 0.021378 | 0.01406  | 5  |
| BP | GO:0034368 | 5/655  | 33/18862  | 0.005271 | 0.021378 | 0.01406  | 5  |
| BP | GO:0034369 | 5/655  | 33/18862  | 0.005271 | 0.021378 | 0.01406  | 5  |
| BP | GO:0035025 | 5/655  | 33/18862  | 0.005271 | 0.021378 | 0.01406  | 5  |
| BP | GO:0061049 | 5/655  | 33/18862  | 0.005271 | 0.021378 | 0.01406  | 5  |
| BP | GO:0072538 | 5/655  | 33/18862  | 0.005271 | 0.021378 | 0.01406  | 5  |
| BP | GO:0050714 | 11/655 | 129/18862 | 0.005343 | 0.021652 | 0.01424  | 11 |
| BP | GO:0002363 | 4/655  | 21/18862  | 0.005383 | 0.0217   | 0.014272 | 4  |
| BP | GO:0003177 | 4/655  | 21/18862  | 0.005383 | 0.0217   | 0.014272 | 4  |
| BP | GO:0023058 | 4/655  | 21/18862  | 0.005383 | 0.0217   | 0.014272 | 4  |
| BP | GO:0036303 | 4/655  | 21/18862  | 0.005383 | 0.0217   | 0.014272 | 4  |
| BP | GO:0072574 | 4/655  | 21/18862  | 0.005383 | 0.0217   | 0.014272 | 4  |
| BP | GO:0072575 | 4/655  | 21/18862  | 0.005383 | 0.0217   | 0.014272 | 4  |
| BP | GO:0010951 | 17/655 | 245/18862 | 0.005438 | 0.021903 | 0.014405 | 17 |
| BP | GO:0030574 | 6/655  | 47/18862  | 0.005481 | 0.02202  | 0.014482 | 6  |
| BP | GO:0045646 | 6/655  | 47/18862  | 0.005481 | 0.02202  | 0.014482 | 6  |
| BP | GO:1903587 | 6/655  | 47/18862  | 0.005481 | 0.02202  | 0.014482 | 6  |
| BP | GO:0006027 | 7/655  | 62/18862  | 0.00554  | 0.022158 | 0.014573 | 7  |
| BP | GO:0050792 | 14/655 | 186/18862 | 0.005552 | 0.022158 | 0.014573 | 14 |
| BP | GO:0001787 | 3/655  | 11/18862  | 0.005582 | 0.022158 | 0.014573 | 3  |
| BP | GO:0010739 | 3/655  | 11/18862  | 0.005582 | 0.022158 | 0.014573 | 3  |
| BP | GO:0030157 | 3/655  | 11/18862  | 0.005582 | 0.022158 | 0.014573 | 3  |
| BP | GO:0034145 | 3/655  | 11/18862  | 0.005582 | 0.022158 | 0.014573 | 3  |
| BP | GO:0035747 | 3/655  | 11/18862  | 0.005582 | 0.022158 | 0.014573 | 3  |
| BP | GO:0036363 | 3/655  | 11/18862  | 0.005582 | 0.022158 | 0.014573 | 3  |
| BP | GO:0045348 | 3/655  | 11/18862  | 0.005582 | 0.022158 | 0.014573 | 3  |
| BP | GO:0097048 | 3/655  | 11/18862  | 0.005582 | 0.022158 | 0.014573 | 3  |
| BP | GO:0098883 | 3/655  | 11/18862  | 0.005582 | 0.022158 | 0.014573 | 3  |
| BP | GO:1902287 | 3/655  | 11/18862  | 0.005582 | 0.022158 | 0.014573 | 3  |

|    |            |        |           |          |          |          |    |
|----|------------|--------|-----------|----------|----------|----------|----|
| BP | GO:2000668 | 3/655  | 11/18862  | 0.005582 | 0.022158 | 0.014573 | 3  |
| BP | GO:2000826 | 3/655  | 11/18862  | 0.005582 | 0.022158 | 0.014573 | 3  |
| BP | GO:0001569 | 5/655  | 34/18862  | 0.006007 | 0.023746 | 0.015617 | 5  |
| BP | GO:0002756 | 5/655  | 34/18862  | 0.006007 | 0.023746 | 0.015617 | 5  |
| BP | GO:0044319 | 5/655  | 34/18862  | 0.006007 | 0.023746 | 0.015617 | 5  |
| BP | GO:0090505 | 5/655  | 34/18862  | 0.006007 | 0.023746 | 0.015617 | 5  |
| BP | GO:0022898 | 18/655 | 268/18862 | 0.006008 | 0.023746 | 0.015617 | 18 |
| BP | GO:0015844 | 8/655  | 79/18862  | 0.006053 | 0.023885 | 0.015709 | 8  |
| BP | GO:0030104 | 8/655  | 79/18862  | 0.006053 | 0.023885 | 0.015709 | 8  |
| BP | GO:0002762 | 6/655  | 48/18862  | 0.006085 | 0.023968 | 0.015763 | 6  |
| BP | GO:0014009 | 6/655  | 48/18862  | 0.006085 | 0.023968 | 0.015763 | 6  |
| BP | GO:0060541 | 14/655 | 188/18862 | 0.00609  | 0.02397  | 0.015764 | 14 |
| BP | GO:1901184 | 9/655  | 96/18862  | 0.006148 | 0.024178 | 0.015901 | 9  |
| BP | GO:0002223 | 10/655 | 114/18862 | 0.006358 | 0.024962 | 0.016417 | 10 |
| BP | GO:0003231 | 10/655 | 114/18862 | 0.006358 | 0.024962 | 0.016417 | 10 |
| BP | GO:0010888 | 4/655  | 22/18862  | 0.006401 | 0.025005 | 0.016445 | 4  |
| BP | GO:0043369 | 4/655  | 22/18862  | 0.006401 | 0.025005 | 0.016445 | 4  |
| BP | GO:0045624 | 4/655  | 22/18862  | 0.006401 | 0.025005 | 0.016445 | 4  |
| BP | GO:0072576 | 4/655  | 22/18862  | 0.006401 | 0.025005 | 0.016445 | 4  |
| BP | GO:1903589 | 4/655  | 22/18862  | 0.006401 | 0.025005 | 0.016445 | 4  |
| BP | GO:2000725 | 4/655  | 22/18862  | 0.006401 | 0.025005 | 0.016445 | 4  |
| BP | GO:0032677 | 9/655  | 97/18862  | 0.006574 | 0.025659 | 0.016875 | 9  |
| BP | GO:0007160 | 16/655 | 230/18862 | 0.006713 | 0.02618  | 0.017218 | 16 |
| BP | GO:0032330 | 6/655  | 49/18862  | 0.006735 | 0.026198 | 0.01723  | 6  |
| BP | GO:0032692 | 6/655  | 49/18862  | 0.006735 | 0.026198 | 0.01723  | 6  |
| BP | GO:0072132 | 6/655  | 49/18862  | 0.006735 | 0.026198 | 0.01723  | 6  |
| BP | GO:0034367 | 5/655  | 35/18862  | 0.006812 | 0.026431 | 0.017383 | 5  |
| BP | GO:0090504 | 5/655  | 35/18862  | 0.006812 | 0.026431 | 0.017383 | 5  |
| BP | GO:0097009 | 5/655  | 35/18862  | 0.006812 | 0.026431 | 0.017383 | 5  |
| BP | GO:0045824 | 7/655  | 65/18862  | 0.007175 | 0.027796 | 0.01828  | 7  |
| BP | GO:0044409 | 12/655 | 153/18862 | 0.007184 | 0.027796 | 0.01828  | 12 |
| BP | GO:0110053 | 18/655 | 273/18862 | 0.007228 | 0.027796 | 0.01828  | 18 |
| BP | GO:0002002 | 3/655  | 12/18862  | 0.007253 | 0.027796 | 0.01828  | 3  |
| BP | GO:0002003 | 3/655  | 12/18862  | 0.007253 | 0.027796 | 0.01828  | 3  |
| BP | GO:0002863 | 3/655  | 12/18862  | 0.007253 | 0.027796 | 0.01828  | 3  |
| BP | GO:0032908 | 3/655  | 12/18862  | 0.007253 | 0.027796 | 0.01828  | 3  |
| BP | GO:0035630 | 3/655  | 12/18862  | 0.007253 | 0.027796 | 0.01828  | 3  |
| BP | GO:0043380 | 3/655  | 12/18862  | 0.007253 | 0.027796 | 0.01828  | 3  |
| BP | GO:0045989 | 3/655  | 12/18862  | 0.007253 | 0.027796 | 0.01828  | 3  |
| BP | GO:0051549 | 3/655  | 12/18862  | 0.007253 | 0.027796 | 0.01828  | 3  |
| BP | GO:0070278 | 3/655  | 12/18862  | 0.007253 | 0.027796 | 0.01828  | 3  |
| BP | GO:1900272 | 3/655  | 12/18862  | 0.007253 | 0.027796 | 0.01828  | 3  |
| BP | GO:2000727 | 3/655  | 12/18862  | 0.007253 | 0.027796 | 0.01828  | 3  |
| BP | GO:2001204 | 3/655  | 12/18862  | 0.007253 | 0.027796 | 0.01828  | 3  |
| BP | GO:0043254 | 26/655 | 446/18862 | 0.00726  | 0.027799 | 0.018283 | 26 |
| BP | GO:0007623 | 15/655 | 212/18862 | 0.007329 | 0.028018 | 0.018426 | 15 |
| BP | GO:0008406 | 15/655 | 212/18862 | 0.007329 | 0.028018 | 0.018426 | 15 |
| BP | GO:0002931 | 6/655  | 50/18862  | 0.007434 | 0.02835  | 0.018645 | 6  |
| BP | GO:0032648 | 6/655  | 50/18862  | 0.007434 | 0.02835  | 0.018645 | 6  |

|    |            |        |           |          |          |          |    |
|----|------------|--------|-----------|----------|----------|----------|----|
| BP | GO:0045744 | 6/655  | 50/18862  | 0.007434 | 0.02835  | 0.018645 | 6  |
| BP | GO:0051384 | 11/655 | 135/18862 | 0.00747  | 0.028465 | 0.018721 | 11 |
| BP | GO:0043279 | 9/655  | 99/18862  | 0.007495 | 0.028534 | 0.018766 | 9  |
| BP | GO:0002438 | 4/655  | 23/18862  | 0.00754  | 0.028567 | 0.018787 | 4  |
| BP | GO:0010738 | 4/655  | 23/18862  | 0.00754  | 0.028567 | 0.018787 | 4  |
| BP | GO:0071157 | 4/655  | 23/18862  | 0.00754  | 0.028567 | 0.018787 | 4  |
| BP | GO:0071676 | 4/655  | 23/18862  | 0.00754  | 0.028567 | 0.018787 | 4  |
| BP | GO:1904385 | 4/655  | 23/18862  | 0.00754  | 0.028567 | 0.018787 | 4  |
| BP | GO:1904754 | 4/655  | 23/18862  | 0.00754  | 0.028567 | 0.018787 | 4  |
| BP | GO:0032715 | 7/655  | 66/18862  | 0.007793 | 0.029501 | 0.019402 | 7  |
| BP | GO:0050804 | 24/655 | 405/18862 | 0.007979 | 0.03018  | 0.019849 | 24 |
| BP | GO:0032092 | 8/655  | 83/18862  | 0.008117 | 0.030679 | 0.020176 | 8  |
| BP | GO:0052126 | 13/655 | 175/18862 | 0.008204 | 0.030982 | 0.020376 | 13 |
| BP | GO:0034394 | 7/655  | 67/18862  | 0.008449 | 0.031829 | 0.020933 | 7  |
| BP | GO:0072078 | 7/655  | 67/18862  | 0.008449 | 0.031829 | 0.020933 | 7  |
| BP | GO:1905953 | 7/655  | 67/18862  | 0.008449 | 0.031829 | 0.020933 | 7  |
| BP | GO:0014812 | 9/655  | 101/18862 | 0.00851  | 0.032034 | 0.021068 | 9  |
| BP | GO:0050868 | 10/655 | 119/18862 | 0.008531 | 0.032086 | 0.021102 | 10 |
| BP | GO:0010737 | 5/655  | 37/18862  | 0.008642 | 0.032479 | 0.021361 | 5  |
| BP | GO:0061351 | 11/655 | 138/18862 | 0.008756 | 0.032822 | 0.021586 | 11 |
| BP | GO:0072006 | 11/655 | 138/18862 | 0.008756 | 0.032822 | 0.021586 | 11 |
| BP | GO:0002418 | 4/655  | 24/18862  | 0.008804 | 0.032822 | 0.021586 | 4  |
| BP | GO:0003272 | 4/655  | 24/18862  | 0.008804 | 0.032822 | 0.021586 | 4  |
| BP | GO:0010804 | 4/655  | 24/18862  | 0.008804 | 0.032822 | 0.021586 | 4  |
| BP | GO:0014829 | 4/655  | 24/18862  | 0.008804 | 0.032822 | 0.021586 | 4  |
| BP | GO:0060396 | 4/655  | 24/18862  | 0.008804 | 0.032822 | 0.021586 | 4  |
| BP | GO:1905523 | 4/655  | 24/18862  | 0.008804 | 0.032822 | 0.021586 | 4  |
| BP | GO:1905564 | 4/655  | 24/18862  | 0.008804 | 0.032822 | 0.021586 | 4  |
| BP | GO:2001026 | 4/655  | 24/18862  | 0.008804 | 0.032822 | 0.021586 | 4  |
| BP | GO:0050708 | 18/655 | 279/18862 | 0.00895  | 0.03334  | 0.021927 | 18 |
| BP | GO:0002886 | 6/655  | 52/18862  | 0.008987 | 0.033392 | 0.021961 | 6  |
| BP | GO:0032608 | 6/655  | 52/18862  | 0.008987 | 0.033392 | 0.021961 | 6  |
| BP | GO:0051155 | 6/655  | 52/18862  | 0.008987 | 0.033392 | 0.021961 | 6  |
| BP | GO:0045137 | 15/655 | 217/18862 | 0.008992 | 0.033392 | 0.021961 | 15 |
| BP | GO:0006026 | 7/655  | 68/18862  | 0.009144 | 0.033584 | 0.022087 | 7  |
| BP | GO:0043507 | 7/655  | 68/18862  | 0.009144 | 0.033584 | 0.022087 | 7  |
| BP | GO:0045685 | 7/655  | 68/18862  | 0.009144 | 0.033584 | 0.022087 | 7  |
| BP | GO:0051937 | 7/655  | 68/18862  | 0.009144 | 0.033584 | 0.022087 | 7  |
| BP | GO:0002430 | 3/655  | 13/18862  | 0.009188 | 0.033584 | 0.022087 | 3  |
| BP | GO:0002921 | 3/655  | 13/18862  | 0.009188 | 0.033584 | 0.022087 | 3  |
| BP | GO:0032274 | 3/655  | 13/18862  | 0.009188 | 0.033584 | 0.022087 | 3  |
| BP | GO:0032905 | 3/655  | 13/18862  | 0.009188 | 0.033584 | 0.022087 | 3  |
| BP | GO:0043379 | 3/655  | 13/18862  | 0.009188 | 0.033584 | 0.022087 | 3  |
| BP | GO:0045472 | 3/655  | 13/18862  | 0.009188 | 0.033584 | 0.022087 | 3  |
| BP | GO:0045741 | 3/655  | 13/18862  | 0.009188 | 0.033584 | 0.022087 | 3  |
| BP | GO:0050872 | 3/655  | 13/18862  | 0.009188 | 0.033584 | 0.022087 | 3  |
| BP | GO:0055057 | 3/655  | 13/18862  | 0.009188 | 0.033584 | 0.022087 | 3  |
| BP | GO:0060347 | 3/655  | 13/18862  | 0.009188 | 0.033584 | 0.022087 | 3  |
| BP | GO:0060841 | 3/655  | 13/18862  | 0.009188 | 0.033584 | 0.022087 | 3  |

|    |            |        |           |          |          |          |    |
|----|------------|--------|-----------|----------|----------|----------|----|
| BP | GO:0071285 | 3/655  | 13/18862  | 0.009188 | 0.033584 | 0.022087 | 3  |
| BP | GO:0071635 | 3/655  | 13/18862  | 0.009188 | 0.033584 | 0.022087 | 3  |
| BP | GO:1902285 | 3/655  | 13/18862  | 0.009188 | 0.033584 | 0.022087 | 3  |
| BP | GO:1902947 | 3/655  | 13/18862  | 0.009188 | 0.033584 | 0.022087 | 3  |
| BP | GO:1904995 | 3/655  | 13/18862  | 0.009188 | 0.033584 | 0.022087 | 3  |
| BP | GO:0010810 | 15/655 | 218/18862 | 0.009359 | 0.03418  | 0.022479 | 15 |
| BP | GO:0009306 | 22/655 | 367/18862 | 0.009513 | 0.034718 | 0.022833 | 22 |
| BP | GO:0010811 | 10/655 | 121/18862 | 0.009544 | 0.034774 | 0.02287  | 10 |
| BP | GO:0034101 | 10/655 | 121/18862 | 0.009544 | 0.034774 | 0.02287  | 10 |
| BP | GO:0032637 | 9/655  | 103/18862 | 0.009626 | 0.035033 | 0.02304  | 9  |
| BP | GO:2000241 | 12/655 | 159/18862 | 0.009629 | 0.035033 | 0.02304  | 12 |
| BP | GO:0097242 | 5/655  | 38/18862  | 0.009674 | 0.035166 | 0.023128 | 5  |
| BP | GO:0045861 | 21/655 | 346/18862 | 0.009763 | 0.035463 | 0.023323 | 21 |
| BP | GO:0035592 | 22/655 | 368/18862 | 0.0098   | 0.03557  | 0.023393 | 22 |
| BP | GO:0007369 | 13/655 | 179/18862 | 0.00982  | 0.035614 | 0.023422 | 13 |
| BP | GO:0001541 | 6/655  | 53/18862  | 0.009844 | 0.035648 | 0.023444 | 6  |
| BP | GO:0010332 | 6/655  | 53/18862  | 0.009844 | 0.035648 | 0.023444 | 6  |
| BP | GO:0072088 | 7/655  | 69/18862  | 0.00988  | 0.03575  | 0.023512 | 7  |
| BP | GO:0019218 | 10/655 | 122/18862 | 0.010083 | 0.036456 | 0.023976 | 10 |
| BP | GO:0001562 | 4/655  | 25/18862  | 0.010198 | 0.036586 | 0.024062 | 4  |
| BP | GO:0031664 | 4/655  | 25/18862  | 0.010198 | 0.036586 | 0.024062 | 4  |
| BP | GO:0033622 | 4/655  | 25/18862  | 0.010198 | 0.036586 | 0.024062 | 4  |
| BP | GO:0035902 | 4/655  | 25/18862  | 0.010198 | 0.036586 | 0.024062 | 4  |
| BP | GO:0042730 | 4/655  | 25/18862  | 0.010198 | 0.036586 | 0.024062 | 4  |
| BP | GO:0042832 | 4/655  | 25/18862  | 0.010198 | 0.036586 | 0.024062 | 4  |
| BP | GO:0051873 | 4/655  | 25/18862  | 0.010198 | 0.036586 | 0.024062 | 4  |
| BP | GO:0071378 | 4/655  | 25/18862  | 0.010198 | 0.036586 | 0.024062 | 4  |
| BP | GO:0072012 | 4/655  | 25/18862  | 0.010198 | 0.036586 | 0.024062 | 4  |
| BP | GO:0072202 | 4/655  | 25/18862  | 0.010198 | 0.036586 | 0.024062 | 4  |
| BP | GO:0062013 | 11/655 | 141/18862 | 0.010206 | 0.036586 | 0.024062 | 11 |
| BP | GO:0019058 | 21/655 | 348/18862 | 0.010376 | 0.037168 | 0.024444 | 21 |
| BP | GO:0055067 | 12/655 | 161/18862 | 0.010574 | 0.037849 | 0.024892 | 12 |
| BP | GO:0007498 | 10/655 | 123/18862 | 0.010646 | 0.038077 | 0.025042 | 10 |
| BP | GO:0010676 | 6/655  | 54/18862  | 0.010759 | 0.038376 | 0.025238 | 6  |
| BP | GO:0046622 | 6/655  | 54/18862  | 0.010759 | 0.038376 | 0.025238 | 6  |
| BP | GO:0002701 | 5/655  | 39/18862  | 0.010787 | 0.038376 | 0.025238 | 5  |
| BP | GO:0044058 | 5/655  | 39/18862  | 0.010787 | 0.038376 | 0.025238 | 5  |
| BP | GO:0072210 | 5/655  | 39/18862  | 0.010787 | 0.038376 | 0.025238 | 5  |
| BP | GO:1905521 | 5/655  | 39/18862  | 0.010787 | 0.038376 | 0.025238 | 5  |
| BP | GO:2001222 | 5/655  | 39/18862  | 0.010787 | 0.038376 | 0.025238 | 5  |
| BP | GO:0007179 | 14/655 | 202/18862 | 0.011129 | 0.039561 | 0.026018 | 14 |
| BP | GO:0002864 | 3/655  | 14/18862  | 0.011396 | 0.040266 | 0.026482 | 3  |
| BP | GO:0010872 | 3/655  | 14/18862  | 0.011396 | 0.040266 | 0.026482 | 3  |
| BP | GO:0010935 | 3/655  | 14/18862  | 0.011396 | 0.040266 | 0.026482 | 3  |
| BP | GO:0032966 | 3/655  | 14/18862  | 0.011396 | 0.040266 | 0.026482 | 3  |
| BP | GO:0035437 | 3/655  | 14/18862  | 0.011396 | 0.040266 | 0.026482 | 3  |
| BP | GO:0036295 | 3/655  | 14/18862  | 0.011396 | 0.040266 | 0.026482 | 3  |
| BP | GO:0051547 | 3/655  | 14/18862  | 0.011396 | 0.040266 | 0.026482 | 3  |
| BP | GO:0090715 | 3/655  | 14/18862  | 0.011396 | 0.040266 | 0.026482 | 3  |

|    |            |        |           |          |          |          |    |
|----|------------|--------|-----------|----------|----------|----------|----|
| BP | GO:0032024 | 7/655  | 71/18862  | 0.011481 | 0.040414 | 0.026579 | 7  |
| BP | GO:0032720 | 7/655  | 71/18862  | 0.011481 | 0.040414 | 0.026579 | 7  |
| BP | GO:0061333 | 7/655  | 71/18862  | 0.011481 | 0.040414 | 0.026579 | 7  |
| BP | GO:0072028 | 7/655  | 71/18862  | 0.011481 | 0.040414 | 0.026579 | 7  |
| BP | GO:0098586 | 7/655  | 71/18862  | 0.011481 | 0.040414 | 0.026579 | 7  |
| BP | GO:0007229 | 9/655  | 106/18862 | 0.011504 | 0.040432 | 0.026591 | 9  |
| BP | GO:0048259 | 9/655  | 106/18862 | 0.011504 | 0.040432 | 0.026591 | 9  |
| BP | GO:0046890 | 14/655 | 203/18862 | 0.011586 | 0.040659 | 0.02674  | 14 |
| BP | GO:1902905 | 14/655 | 203/18862 | 0.011586 | 0.040659 | 0.02674  | 14 |
| BP | GO:0001945 | 4/655  | 26/18862  | 0.011728 | 0.040802 | 0.026834 | 4  |
| BP | GO:0010460 | 4/655  | 26/18862  | 0.011728 | 0.040802 | 0.026834 | 4  |
| BP | GO:0021772 | 4/655  | 26/18862  | 0.011728 | 0.040802 | 0.026834 | 4  |
| BP | GO:0042104 | 4/655  | 26/18862  | 0.011728 | 0.040802 | 0.026834 | 4  |
| BP | GO:0048520 | 4/655  | 26/18862  | 0.011728 | 0.040802 | 0.026834 | 4  |
| BP | GO:0060142 | 4/655  | 26/18862  | 0.011728 | 0.040802 | 0.026834 | 4  |
| BP | GO:0061437 | 4/655  | 26/18862  | 0.011728 | 0.040802 | 0.026834 | 4  |
| BP | GO:0061440 | 4/655  | 26/18862  | 0.011728 | 0.040802 | 0.026834 | 4  |
| BP | GO:0098868 | 4/655  | 26/18862  | 0.011728 | 0.040802 | 0.026834 | 4  |
| BP | GO:1900746 | 4/655  | 26/18862  | 0.011728 | 0.040802 | 0.026834 | 4  |
| BP | GO:0001912 | 6/655  | 55/18862  | 0.011731 | 0.040802 | 0.026834 | 6  |
| BP | GO:1903428 | 6/655  | 55/18862  | 0.011731 | 0.040802 | 0.026834 | 6  |
| BP | GO:0150077 | 5/655  | 40/18862  | 0.011985 | 0.041651 | 0.027393 | 5  |
| BP | GO:0071692 | 22/655 | 375/18862 | 0.012007 | 0.041699 | 0.027424 | 22 |
| BP | GO:0051052 | 21/655 | 353/18862 | 0.012044 | 0.041796 | 0.027488 | 21 |
| BP | GO:0019935 | 8/655  | 89/18862  | 0.012146 | 0.042087 | 0.027679 | 8  |
| BP | GO:0051149 | 8/655  | 89/18862  | 0.012146 | 0.042087 | 0.027679 | 8  |
| BP | GO:1903036 | 7/655  | 72/18862  | 0.012349 | 0.042757 | 0.02812  | 7  |
| BP | GO:1903169 | 11/655 | 145/18862 | 0.012418 | 0.042965 | 0.028257 | 11 |
| BP | GO:0007584 | 12/655 | 165/18862 | 0.012676 | 0.043826 | 0.028823 | 12 |
| BP | GO:0021872 | 6/655  | 56/18862  | 0.012764 | 0.044066 | 0.028981 | 6  |
| BP | GO:0060135 | 6/655  | 56/18862  | 0.012764 | 0.044066 | 0.028981 | 6  |
| BP | GO:0071456 | 14/655 | 206/18862 | 0.013045 | 0.045001 | 0.029596 | 14 |
| BP | GO:0048469 | 12/655 | 166/18862 | 0.013249 | 0.04564  | 0.030016 | 12 |
| BP | GO:0060193 | 7/655  | 73/18862  | 0.013262 | 0.04564  | 0.030016 | 7  |
| BP | GO:0046596 | 5/655  | 41/18862  | 0.013269 | 0.04564  | 0.030016 | 5  |
| BP | GO:0050691 | 5/655  | 41/18862  | 0.013269 | 0.04564  | 0.030016 | 5  |
| BP | GO:0003401 | 4/655  | 27/18862  | 0.013397 | 0.045844 | 0.03015  | 4  |
| BP | GO:0010758 | 4/655  | 27/18862  | 0.013397 | 0.045844 | 0.03015  | 4  |
| BP | GO:0010818 | 4/655  | 27/18862  | 0.013397 | 0.045844 | 0.03015  | 4  |
| BP | GO:0032967 | 4/655  | 27/18862  | 0.013397 | 0.045844 | 0.03015  | 4  |
| BP | GO:0034123 | 4/655  | 27/18862  | 0.013397 | 0.045844 | 0.03015  | 4  |
| BP | GO:0045671 | 4/655  | 27/18862  | 0.013397 | 0.045844 | 0.03015  | 4  |
| BP | GO:0051883 | 4/655  | 27/18862  | 0.013397 | 0.045844 | 0.03015  | 4  |
| BP | GO:0030301 | 9/655  | 109/18862 | 0.013642 | 0.046648 | 0.030679 | 9  |
| BP | GO:0055008 | 6/655  | 57/18862  | 0.01386  | 0.047057 | 0.030948 | 6  |
| BP | GO:0010713 | 3/655  | 15/18862  | 0.013883 | 0.047057 | 0.030948 | 3  |
| BP | GO:0010838 | 3/655  | 15/18862  | 0.013883 | 0.047057 | 0.030948 | 3  |
| BP | GO:0010934 | 3/655  | 15/18862  | 0.013883 | 0.047057 | 0.030948 | 3  |
| BP | GO:0045579 | 3/655  | 15/18862  | 0.013883 | 0.047057 | 0.030948 | 3  |

|    |            |        |           |          |          |          |    |
|----|------------|--------|-----------|----------|----------|----------|----|
| BP | GO:0048532 | 3/655  | 15/18862  | 0.013883 | 0.047057 | 0.030948 | 3  |
| BP | GO:0055091 | 3/655  | 15/18862  | 0.013883 | 0.047057 | 0.030948 | 3  |
| BP | GO:0072224 | 3/655  | 15/18862  | 0.013883 | 0.047057 | 0.030948 | 3  |
| BP | GO:1900225 | 3/655  | 15/18862  | 0.013883 | 0.047057 | 0.030948 | 3  |
| BP | GO:2000345 | 3/655  | 15/18862  | 0.013883 | 0.047057 | 0.030948 | 3  |
| BP | GO:2001028 | 3/655  | 15/18862  | 0.013883 | 0.047057 | 0.030948 | 3  |
| BP | GO:2001224 | 3/655  | 15/18862  | 0.013883 | 0.047057 | 0.030948 | 3  |
| BP | GO:0042593 | 15/655 | 229/18862 | 0.014213 | 0.048141 | 0.031661 | 15 |
| BP | GO:0051702 | 8/655  | 92/18862  | 0.014637 | 0.049527 | 0.032573 | 8  |
| BP | GO:0045687 | 5/655  | 42/18862  | 0.014644 | 0.049527 | 0.032573 | 5  |
| BP | GO:0033500 | 15/655 | 230/18862 | 0.014736 | 0.049804 | 0.032755 | 15 |
| BP | GO:1901343 | 11/655 | 149/18862 | 0.014977 | 0.050581 | 0.033266 | 11 |
| BP | GO:0010575 | 4/655  | 28/18862  | 0.015211 | 0.051259 | 0.033712 | 4  |
| BP | GO:0010714 | 4/655  | 28/18862  | 0.015211 | 0.051259 | 0.033712 | 4  |
| BP | GO:1902547 | 4/655  | 28/18862  | 0.015211 | 0.051259 | 0.033712 | 4  |
| BP | GO:0001937 | 7/655  | 75/18862  | 0.015233 | 0.051259 | 0.033712 | 7  |
| BP | GO:0002200 | 7/655  | 75/18862  | 0.015233 | 0.051259 | 0.033712 | 7  |
| BP | GO:0014013 | 8/655  | 93/18862  | 0.015545 | 0.052271 | 0.034377 | 8  |
| BP | GO:0043535 | 11/655 | 150/18862 | 0.015675 | 0.052671 | 0.03464  | 11 |
| BP | GO:0021782 | 9/655  | 112/18862 | 0.016062 | 0.053933 | 0.03547  | 9  |
| BP | GO:0045840 | 5/655  | 43/18862  | 0.01611  | 0.053979 | 0.0355   | 5  |
| BP | GO:1900744 | 5/655  | 43/18862  | 0.01611  | 0.053979 | 0.0355   | 5  |
| BP | GO:2000404 | 5/655  | 43/18862  | 0.01611  | 0.053979 | 0.0355   | 5  |
| BP | GO:0043271 | 19/655 | 319/18862 | 0.016196 | 0.054227 | 0.035663 | 19 |
| BP | GO:0032663 | 6/655  | 59/18862  | 0.016244 | 0.054269 | 0.035691 | 6  |
| BP | GO:0051055 | 6/655  | 59/18862  | 0.016244 | 0.054269 | 0.035691 | 6  |
| BP | GO:0090303 | 6/655  | 59/18862  | 0.016244 | 0.054269 | 0.035691 | 6  |
| BP | GO:0051302 | 12/655 | 171/18862 | 0.016412 | 0.054792 | 0.036035 | 12 |
| BP | GO:0002693 | 3/655  | 16/18862  | 0.016653 | 0.055164 | 0.03628  | 3  |
| BP | GO:0002830 | 3/655  | 16/18862  | 0.016653 | 0.055164 | 0.03628  | 3  |
| BP | GO:0010819 | 3/655  | 16/18862  | 0.016653 | 0.055164 | 0.03628  | 3  |
| BP | GO:0036035 | 3/655  | 16/18862  | 0.016653 | 0.055164 | 0.03628  | 3  |
| BP | GO:0044764 | 3/655  | 16/18862  | 0.016653 | 0.055164 | 0.03628  | 3  |
| BP | GO:0048012 | 3/655  | 16/18862  | 0.016653 | 0.055164 | 0.03628  | 3  |
| BP | GO:0048486 | 3/655  | 16/18862  | 0.016653 | 0.055164 | 0.03628  | 3  |
| BP | GO:0048521 | 3/655  | 16/18862  | 0.016653 | 0.055164 | 0.03628  | 3  |
| BP | GO:0051580 | 3/655  | 16/18862  | 0.016653 | 0.055164 | 0.03628  | 3  |
| BP | GO:0051709 | 3/655  | 16/18862  | 0.016653 | 0.055164 | 0.03628  | 3  |
| BP | GO:0090594 | 3/655  | 16/18862  | 0.016653 | 0.055164 | 0.03628  | 3  |
| BP | GO:0001916 | 4/655  | 29/18862  | 0.017172 | 0.05672  | 0.037303 | 4  |
| BP | GO:0003209 | 4/655  | 29/18862  | 0.017172 | 0.05672  | 0.037303 | 4  |
| BP | GO:0072539 | 4/655  | 29/18862  | 0.017172 | 0.05672  | 0.037303 | 4  |
| BP | GO:1900745 | 4/655  | 29/18862  | 0.017172 | 0.05672  | 0.037303 | 4  |
| BP | GO:0032868 | 17/655 | 278/18862 | 0.017607 | 0.058118 | 0.038223 | 17 |
| BP | GO:0036294 | 14/655 | 214/18862 | 0.017635 | 0.058167 | 0.038255 | 14 |
| BP | GO:0046427 | 5/655  | 44/18862  | 0.017672 | 0.058247 | 0.038307 | 5  |
| BP | GO:0010633 | 9/655  | 114/18862 | 0.017841 | 0.058764 | 0.038647 | 9  |
| BP | GO:0071897 | 13/655 | 194/18862 | 0.018181 | 0.059843 | 0.039357 | 13 |
| BP | GO:0003300 | 8/655  | 96/18862  | 0.018511 | 0.060776 | 0.03997  | 8  |

|    |            |        |           |          |          |          |    |
|----|------------|--------|-----------|----------|----------|----------|----|
| BP | GO:0032091 | 8/655  | 96/18862  | 0.018511 | 0.060776 | 0.03997  | 8  |
| BP | GO:0043255 | 8/655  | 96/18862  | 0.018511 | 0.060776 | 0.03997  | 8  |
| BP | GO:0090101 | 10/655 | 134/18862 | 0.018517 | 0.060776 | 0.03997  | 10 |
| BP | GO:0070373 | 7/655  | 78/18862  | 0.018566 | 0.060895 | 0.040049 | 7  |
| BP | GO:0015849 | 19/655 | 324/18862 | 0.018739 | 0.06142  | 0.040394 | 19 |
| BP | GO:0001704 | 9/655  | 115/18862 | 0.018782 | 0.061473 | 0.040429 | 9  |
| BP | GO:0030218 | 9/655  | 115/18862 | 0.018782 | 0.061473 | 0.040429 | 9  |
| BP | GO:0032623 | 6/655  | 61/18862  | 0.018896 | 0.061804 | 0.040646 | 6  |
| BP | GO:0002828 | 4/655  | 30/18862  | 0.019283 | 0.062717 | 0.041247 | 4  |
| BP | GO:0007176 | 4/655  | 30/18862  | 0.019283 | 0.062717 | 0.041247 | 4  |
| BP | GO:0019934 | 4/655  | 30/18862  | 0.019283 | 0.062717 | 0.041247 | 4  |
| BP | GO:0032743 | 4/655  | 30/18862  | 0.019283 | 0.062717 | 0.041247 | 4  |
| BP | GO:0035666 | 4/655  | 30/18862  | 0.019283 | 0.062717 | 0.041247 | 4  |
| BP | GO:0055022 | 4/655  | 30/18862  | 0.019283 | 0.062717 | 0.041247 | 4  |
| BP | GO:0060045 | 4/655  | 30/18862  | 0.019283 | 0.062717 | 0.041247 | 4  |
| BP | GO:0061117 | 4/655  | 30/18862  | 0.019283 | 0.062717 | 0.041247 | 4  |
| BP | GO:0002707 | 5/655  | 45/18862  | 0.01933  | 0.062737 | 0.04126  | 5  |
| BP | GO:0032924 | 5/655  | 45/18862  | 0.01933  | 0.062737 | 0.04126  | 5  |
| BP | GO:0034122 | 5/655  | 45/18862  | 0.01933  | 0.062737 | 0.04126  | 5  |
| BP | GO:1902903 | 21/655 | 370/18862 | 0.019371 | 0.062827 | 0.04132  | 21 |
| BP | GO:0001890 | 10/655 | 135/18862 | 0.0194   | 0.062836 | 0.041325 | 10 |
| BP | GO:0042542 | 10/655 | 135/18862 | 0.0194   | 0.062836 | 0.041325 | 10 |
| BP | GO:0002027 | 8/655  | 97/18862  | 0.019584 | 0.063223 | 0.04158  | 8  |
| BP | GO:0010596 | 8/655  | 97/18862  | 0.019584 | 0.063223 | 0.04158  | 8  |
| BP | GO:0034284 | 13/655 | 196/18862 | 0.019612 | 0.063223 | 0.04158  | 13 |
| BP | GO:0042594 | 13/655 | 196/18862 | 0.019612 | 0.063223 | 0.04158  | 13 |
| BP | GO:1903792 | 14/655 | 217/18862 | 0.019641 | 0.063223 | 0.04158  | 14 |
| BP | GO:0001696 | 3/655  | 17/18862  | 0.01971  | 0.063223 | 0.04158  | 3  |
| BP | GO:0003085 | 3/655  | 17/18862  | 0.01971  | 0.063223 | 0.04158  | 3  |
| BP | GO:0003184 | 3/655  | 17/18862  | 0.01971  | 0.063223 | 0.04158  | 3  |
| BP | GO:0010715 | 3/655  | 17/18862  | 0.01971  | 0.063223 | 0.04158  | 3  |
| BP | GO:0010759 | 3/655  | 17/18862  | 0.01971  | 0.063223 | 0.04158  | 3  |
| BP | GO:0033623 | 3/655  | 17/18862  | 0.01971  | 0.063223 | 0.04158  | 3  |
| BP | GO:0048535 | 3/655  | 17/18862  | 0.01971  | 0.063223 | 0.04158  | 3  |
| BP | GO:0060602 | 3/655  | 17/18862  | 0.01971  | 0.063223 | 0.04158  | 3  |
| BP | GO:0090713 | 3/655  | 17/18862  | 0.01971  | 0.063223 | 0.04158  | 3  |
| BP | GO:0001776 | 7/655  | 79/18862  | 0.019783 | 0.063326 | 0.041648 | 7  |
| BP | GO:0002312 | 7/655  | 79/18862  | 0.019783 | 0.063326 | 0.041648 | 7  |
| BP | GO:0006826 | 7/655  | 79/18862  | 0.019783 | 0.063326 | 0.041648 | 7  |
| BP | GO:0070588 | 18/655 | 304/18862 | 0.019945 | 0.063802 | 0.041961 | 18 |
| BP | GO:0097193 | 17/655 | 283/18862 | 0.020555 | 0.06571  | 0.043215 | 17 |
| BP | GO:2001257 | 12/655 | 177/18862 | 0.020923 | 0.06684  | 0.043959 | 12 |
| BP | GO:0001895 | 7/655  | 80/18862  | 0.021054 | 0.067211 | 0.044202 | 7  |
| BP | GO:0051701 | 14/655 | 219/18862 | 0.021071 | 0.06722  | 0.044209 | 14 |
| BP | GO:0043303 | 5/655  | 46/18862  | 0.021086 | 0.067223 | 0.04421  | 5  |
| BP | GO:0002230 | 4/655  | 31/18862  | 0.021548 | 0.068182 | 0.044841 | 4  |
| BP | GO:0002323 | 4/655  | 31/18862  | 0.021548 | 0.068182 | 0.044841 | 4  |
| BP | GO:0002347 | 4/655  | 31/18862  | 0.021548 | 0.068182 | 0.044841 | 4  |
| BP | GO:0003180 | 4/655  | 31/18862  | 0.021548 | 0.068182 | 0.044841 | 4  |

|    |            |        |           |          |          |          |    |
|----|------------|--------|-----------|----------|----------|----------|----|
| BP | GO:0003338 | 4/655  | 31/18862  | 0.021548 | 0.068182 | 0.044841 | 4  |
| BP | GO:0030431 | 4/655  | 31/18862  | 0.021548 | 0.068182 | 0.044841 | 4  |
| BP | GO:0035456 | 4/655  | 31/18862  | 0.021548 | 0.068182 | 0.044841 | 4  |
| BP | GO:0042044 | 4/655  | 31/18862  | 0.021548 | 0.068182 | 0.044841 | 4  |
| BP | GO:0045920 | 4/655  | 31/18862  | 0.021548 | 0.068182 | 0.044841 | 4  |
| BP | GO:0060317 | 4/655  | 31/18862  | 0.021548 | 0.068182 | 0.044841 | 4  |
| BP | GO:0097421 | 4/655  | 31/18862  | 0.021548 | 0.068182 | 0.044841 | 4  |
| BP | GO:0008202 | 19/655 | 329/18862 | 0.021582 | 0.068243 | 0.044881 | 19 |
| BP | GO:0015718 | 12/655 | 178/18862 | 0.021757 | 0.068749 | 0.045214 | 12 |
| BP | GO:0046916 | 9/655  | 118/18862 | 0.021822 | 0.068908 | 0.045319 | 9  |
| BP | GO:0014897 | 8/655  | 99/18862  | 0.021861 | 0.068985 | 0.04537  | 8  |
| BP | GO:0001889 | 10/655 | 138/18862 | 0.022237 | 0.070076 | 0.046087 | 10 |
| BP | GO:0071322 | 10/655 | 138/18862 | 0.022237 | 0.070076 | 0.046087 | 10 |
| BP | GO:0002279 | 5/655  | 47/18862  | 0.022944 | 0.071629 | 0.047108 | 5  |
| BP | GO:0002448 | 5/655  | 47/18862  | 0.022944 | 0.071629 | 0.047108 | 5  |
| BP | GO:0120163 | 5/655  | 47/18862  | 0.022944 | 0.071629 | 0.047108 | 5  |
| BP | GO:0002834 | 3/655  | 18/18862  | 0.023054 | 0.071629 | 0.047108 | 3  |
| BP | GO:0002837 | 3/655  | 18/18862  | 0.023054 | 0.071629 | 0.047108 | 3  |
| BP | GO:0002862 | 3/655  | 18/18862  | 0.023054 | 0.071629 | 0.047108 | 3  |
| BP | GO:0003128 | 3/655  | 18/18862  | 0.023054 | 0.071629 | 0.047108 | 3  |
| BP | GO:0007597 | 3/655  | 18/18862  | 0.023054 | 0.071629 | 0.047108 | 3  |
| BP | GO:0032695 | 3/655  | 18/18862  | 0.023054 | 0.071629 | 0.047108 | 3  |
| BP | GO:0032930 | 3/655  | 18/18862  | 0.023054 | 0.071629 | 0.047108 | 3  |
| BP | GO:0033189 | 3/655  | 18/18862  | 0.023054 | 0.071629 | 0.047108 | 3  |
| BP | GO:0034375 | 3/655  | 18/18862  | 0.023054 | 0.071629 | 0.047108 | 3  |
| BP | GO:0034433 | 3/655  | 18/18862  | 0.023054 | 0.071629 | 0.047108 | 3  |
| BP | GO:0034434 | 3/655  | 18/18862  | 0.023054 | 0.071629 | 0.047108 | 3  |
| BP | GO:0034435 | 3/655  | 18/18862  | 0.023054 | 0.071629 | 0.047108 | 3  |
| BP | GO:0046851 | 3/655  | 18/18862  | 0.023054 | 0.071629 | 0.047108 | 3  |
| BP | GO:0051546 | 3/655  | 18/18862  | 0.023054 | 0.071629 | 0.047108 | 3  |
| BP | GO:0060252 | 3/655  | 18/18862  | 0.023054 | 0.071629 | 0.047108 | 3  |
| BP | GO:0061298 | 3/655  | 18/18862  | 0.023054 | 0.071629 | 0.047108 | 3  |
| BP | GO:0070269 | 3/655  | 18/18862  | 0.023054 | 0.071629 | 0.047108 | 3  |
| BP | GO:1901739 | 3/655  | 18/18862  | 0.023054 | 0.071629 | 0.047108 | 3  |
| BP | GO:0008630 | 8/655  | 100/18862 | 0.023067 | 0.071629 | 0.047108 | 8  |
| BP | GO:0031333 | 10/655 | 139/18862 | 0.023246 | 0.072135 | 0.047441 | 10 |
| BP | GO:0002562 | 6/655  | 64/18862  | 0.023406 | 0.072392 | 0.04761  | 6  |
| BP | GO:0016444 | 6/655  | 64/18862  | 0.023406 | 0.072392 | 0.04761  | 6  |
| BP | GO:0016445 | 6/655  | 64/18862  | 0.023406 | 0.072392 | 0.04761  | 6  |
| BP | GO:0072089 | 6/655  | 64/18862  | 0.023406 | 0.072392 | 0.04761  | 6  |
| BP | GO:1902305 | 6/655  | 64/18862  | 0.023406 | 0.072392 | 0.04761  | 6  |
| BP | GO:0001656 | 7/655  | 82/18862  | 0.023764 | 0.073401 | 0.048273 | 7  |
| BP | GO:2000177 | 7/655  | 82/18862  | 0.023764 | 0.073401 | 0.048273 | 7  |
| BP | GO:0010453 | 4/655  | 32/18862  | 0.023969 | 0.07379  | 0.048529 | 4  |
| BP | GO:0038128 | 4/655  | 32/18862  | 0.023969 | 0.07379  | 0.048529 | 4  |
| BP | GO:0048333 | 4/655  | 32/18862  | 0.023969 | 0.07379  | 0.048529 | 4  |
| BP | GO:0071353 | 4/655  | 32/18862  | 0.023969 | 0.07379  | 0.048529 | 4  |
| BP | GO:0090322 | 4/655  | 32/18862  | 0.023969 | 0.07379  | 0.048529 | 4  |
| BP | GO:0046718 | 10/655 | 140/18862 | 0.024288 | 0.074672 | 0.049109 | 10 |



|    |            |         |           |          |          |          |     |
|----|------------|---------|-----------|----------|----------|----------|-----|
| BP | GO:0061008 | 10/655  | 140/18862 | 0.024288 | 0.074672 | 0.049109 | 10  |
| BP | GO:0014896 | 8/655   | 101/18862 | 0.02432  | 0.074672 | 0.049109 | 8   |
| BP | GO:0097006 | 8/655   | 101/18862 | 0.02432  | 0.074672 | 0.049109 | 8   |
| BP | GO:0043409 | 12/655  | 181/18862 | 0.024405 | 0.074884 | 0.049249 | 12  |
| CC | GO:0019814 | 132/659 | 167/19520 | 7.70E-65 | 2.57E-62 | 1.69E-62 | 132 |
| CC | GO:0009897 | 107/659 | 402/19520 | 6.79E-66 | 1.24E-63 | 1.10E-63 | 107 |
| CC | GO:0042571 | 54/659  | 77/19520  | 4.70E-62 | 5.71E-60 | 5.10E-60 | 54  |
| CC | GO:0072562 | 42/659  | 146/19520 | 1.32E-27 | 1.20E-25 | 1.07E-25 | 42  |
| CC | GO:0062023 | 44/659  | 423/19520 | 3.70E-11 | 2.69E-09 | 2.41E-09 | 44  |
| CC | GO:0034774 | 35/659  | 322/19520 | 1.21E-09 | 7.33E-08 | 6.55E-08 | 35  |
| CC | GO:0060205 | 35/659  | 326/19520 | 1.68E-09 | 8.74E-08 | 7.81E-08 | 35  |
| CC | GO:0031983 | 35/659  | 328/19520 | 1.98E-09 | 8.99E-08 | 8.04E-08 | 35  |
| CC | GO:0070820 | 22/659  | 164/19520 | 3.60E-08 | 1.46E-06 | 1.30E-06 | 22  |
| CC | GO:0042581 | 20/659  | 160/19520 | 4.80E-07 | 1.75E-05 | 1.56E-05 | 20  |
| CC | GO:0045121 | 28/659  | 323/19520 | 5.40E-06 | 0.000155 | 0.000139 | 28  |
| CC | GO:0098857 | 28/659  | 323/19520 | 5.40E-06 | 0.000155 | 0.000139 | 28  |
| CC | GO:0070821 | 12/659  | 73/19520  | 5.54E-06 | 0.000155 | 0.000139 | 12  |
| CC | GO:0005796 | 14/659  | 102/19520 | 8.34E-06 | 0.000217 | 0.000194 | 14  |
| CC | GO:0031091 | 13/659  | 91/19520  | 1.12E-05 | 0.000272 | 0.000243 | 13  |
| CC | GO:0031093 | 11/659  | 67/19520  | 1.37E-05 | 0.000313 | 0.000279 | 11  |
| CC | GO:0030667 | 26/659  | 305/19520 | 1.56E-05 | 0.000334 | 0.000299 | 26  |
| CC | GO:0043020 | 5/659   | 12/19520  | 2.81E-05 | 0.000568 | 0.000507 | 5   |
| CC | GO:0005581 | 12/659  | 87/19520  | 3.47E-05 | 0.000666 | 0.000595 | 12  |
| CC | GO:0030139 | 24/659  | 307/19520 | 0.000128 | 0.002331 | 0.002083 | 24  |
| CC | GO:0101003 | 9/659   | 61/19520  | 0.000195 | 0.003375 | 0.003016 | 9   |
| CC | GO:0035580 | 9/659   | 62/19520  | 0.000221 | 0.003658 | 0.003269 | 9   |
| CC | GO:0035579 | 11/659  | 91/19520  | 0.000244 | 0.003855 | 0.003445 | 11  |
| CC | GO:0005901 | 10/659  | 80/19520  | 0.000352 | 0.005335 | 0.004767 | 10  |
| CC | GO:1904724 | 8/659   | 55/19520  | 0.000485 | 0.007059 | 0.006308 | 8   |
| CC | GO:0101002 | 16/659  | 185/19520 | 0.000557 | 0.007795 | 0.006965 | 16  |
| CC | GO:0005788 | 22/659  | 306/19520 | 0.000755 | 0.010177 | 0.009094 | 22  |
| CC | GO:0071682 | 4/659   | 20/19520  | 0.004051 | 0.052668 | 0.047063 | 4   |
| CC | GO:0044853 | 10/659  | 111/19520 | 0.004346 | 0.054548 | 0.048743 | 10  |
| MF | GO:0030546 | 144/606 | 492/18337 | 6.80E-98 | 4.21E-95 | 3.27E-95 | 144 |
| MF | GO:0048018 | 142/606 | 486/18337 | 2.42E-96 | 7.49E-94 | 5.81E-94 | 142 |
| MF | GO:0003823 | 89/606  | 165/18337 | 4.41E-88 | 9.11E-86 | 7.07E-86 | 89  |
| MF | GO:0034987 | 54/606  | 79/18337  | 1.21E-61 | 1.87E-59 | 1.45E-59 | 54  |
| MF | GO:0005125 | 68/606  | 235/18337 | 4.67E-45 | 5.79E-43 | 4.49E-43 | 68  |
| MF | GO:0008083 | 51/606  | 162/18337 | 5.74E-36 | 5.93E-34 | 4.60E-34 | 51  |
| MF | GO:0005126 | 62/606  | 270/18337 | 1.18E-34 | 1.05E-32 | 8.13E-33 | 62  |
| MF | GO:0019955 | 43/606  | 136/18337 | 1.46E-30 | 1.13E-28 | 8.80E-29 | 43  |
| MF | GO:0005179 | 39/606  | 122/18337 | 5.05E-28 | 3.48E-26 | 2.70E-26 | 39  |
| MF | GO:0001664 | 53/606  | 289/18337 | 1.03E-24 | 6.39E-23 | 4.96E-23 | 53  |
| MF | GO:0004896 | 30/606  | 97/18337  | 2.32E-21 | 1.31E-19 | 1.01E-19 | 30  |
| MF | GO:0140375 | 34/606  | 136/18337 | 9.94E-21 | 5.13E-19 | 3.98E-19 | 34  |
| MF | GO:0008009 | 22/606  | 49/18337  | 3.91E-20 | 1.87E-18 | 1.45E-18 | 22  |
| MF | GO:0008528 | 34/606  | 148/18337 | 1.81E-19 | 8.02E-18 | 6.22E-18 | 34  |
| MF | GO:0001653 | 34/606  | 152/18337 | 4.46E-19 | 1.84E-17 | 1.43E-17 | 34  |
| MF | GO:0042379 | 23/606  | 69/18337  | 1.68E-17 | 6.49E-16 | 5.04E-16 | 23  |

|    |            |        |           |          |          |          |    |
|----|------------|--------|-----------|----------|----------|----------|----|
| MF | GO:0019838 | 28/606 | 137/18337 | 7.24E-15 | 2.64E-13 | 2.05E-13 | 28 |
| MF | GO:0005539 | 35/606 | 228/18337 | 3.02E-14 | 1.04E-12 | 8.06E-13 | 35 |
| MF | GO:0070851 | 25/606 | 141/18337 | 5.81E-12 | 1.89E-10 | 1.47E-10 | 25 |
| MF | GO:0045499 | 12/606 | 27/18337  | 1.68E-11 | 5.22E-10 | 4.05E-10 | 12 |
| MF | GO:0048020 | 14/606 | 46/18337  | 1.44E-10 | 4.26E-09 | 3.31E-09 | 14 |
| MF | GO:0008201 | 24/606 | 164/18337 | 9.49E-10 | 2.67E-08 | 2.08E-08 | 24 |
| MF | GO:0030215 | 10/606 | 23/18337  | 1.12E-09 | 2.89E-08 | 2.25E-08 | 10 |
| MF | GO:0038187 | 10/606 | 23/18337  | 1.12E-09 | 2.89E-08 | 2.25E-08 | 10 |
| MF | GO:0019956 | 11/606 | 33/18337  | 4.69E-09 | 1.16E-07 | 9.02E-08 | 11 |
| MF | GO:0042277 | 33/606 | 315/18337 | 5.25E-09 | 1.25E-07 | 9.72E-08 | 33 |
| MF | GO:0042056 | 11/606 | 37/18337  | 1.84E-08 | 4.22E-07 | 3.27E-07 | 11 |
| MF | GO:0045236 | 8/606  | 18/18337  | 4.44E-08 | 9.83E-07 | 7.62E-07 | 8  |
| MF | GO:0019199 | 15/606 | 80/18337  | 4.69E-08 | 1.00E-06 | 7.78E-07 | 15 |
| MF | GO:0033218 | 35/606 | 391/18337 | 9.96E-08 | 2.06E-06 | 1.60E-06 | 35 |
| MF | GO:1901681 | 27/606 | 260/18337 | 1.57E-07 | 3.13E-06 | 2.43E-06 | 27 |
| MF | GO:0005184 | 9/606  | 30/18337  | 3.41E-07 | 6.60E-06 | 5.12E-06 | 9  |
| MF | GO:0042562 | 14/606 | 84/18337  | 6.00E-07 | 1.13E-05 | 8.75E-06 | 14 |
| MF | GO:0019957 | 8/606  | 24/18337  | 6.26E-07 | 1.14E-05 | 8.85E-06 | 8  |
| MF | GO:0001637 | 8/606  | 26/18337  | 1.25E-06 | 2.16E-05 | 1.67E-05 | 8  |
| MF | GO:0004950 | 8/606  | 26/18337  | 1.25E-06 | 2.16E-05 | 1.67E-05 | 8  |
| MF | GO:0005024 | 6/606  | 13/18337  | 1.79E-06 | 3.00E-05 | 2.33E-05 | 6  |
| MF | GO:0071855 | 9/606  | 37/18337  | 2.41E-06 | 3.93E-05 | 3.05E-05 | 9  |
| MF | GO:1990782 | 14/606 | 98/18337  | 4.04E-06 | 6.42E-05 | 4.98E-05 | 14 |
| MF | GO:0017046 | 10/606 | 50/18337  | 4.49E-06 | 6.97E-05 | 5.41E-05 | 10 |
| MF | GO:0005164 | 8/606  | 31/18337  | 5.47E-06 | 8.27E-05 | 6.42E-05 | 8  |
| MF | GO:0038024 | 12/606 | 75/18337  | 5.94E-06 | 8.76E-05 | 6.80E-05 | 12 |
| MF | GO:0016493 | 7/606  | 23/18337  | 6.43E-06 | 8.99E-05 | 6.97E-05 | 7  |
| MF | GO:0004879 | 10/606 | 52/18337  | 6.52E-06 | 8.99E-05 | 6.97E-05 | 10 |
| MF | GO:0098531 | 10/606 | 52/18337  | 6.52E-06 | 8.99E-05 | 6.97E-05 | 10 |
| MF | GO:0050786 | 5/606  | 10/18337  | 8.51E-06 | 0.000115 | 8.90E-05 | 5  |
| MF | GO:0050431 | 7/606  | 24/18337  | 8.81E-06 | 0.000116 | 9.02E-05 | 7  |
| MF | GO:0030414 | 19/606 | 187/18337 | 1.46E-05 | 0.000189 | 0.000147 | 19 |
| MF | GO:0016175 | 5/606  | 11/18337  | 1.52E-05 | 0.000192 | 0.000149 | 5  |
| MF | GO:0048306 | 12/606 | 84/18337  | 1.96E-05 | 0.000239 | 0.000185 | 12 |
| MF | GO:0005044 | 9/606  | 47/18337  | 1.96E-05 | 0.000239 | 0.000185 | 9  |
| MF | GO:0005501 | 8/606  | 37/18337  | 2.25E-05 | 0.000268 | 0.000208 | 8  |
| MF | GO:0004675 | 6/606  | 19/18337  | 2.39E-05 | 0.000274 | 0.000213 | 6  |
| MF | GO:0030296 | 6/606  | 19/18337  | 2.39E-05 | 0.000274 | 0.000213 | 6  |
| MF | GO:0033612 | 7/606  | 28/18337  | 2.69E-05 | 0.000298 | 0.000232 | 7  |
| MF | GO:0061134 | 21/606 | 230/18337 | 2.70E-05 | 0.000298 | 0.000232 | 21 |
| MF | GO:0019840 | 8/606  | 38/18337  | 2.76E-05 | 0.000298 | 0.000232 | 8  |
| MF | GO:0032813 | 9/606  | 49/18337  | 2.79E-05 | 0.000298 | 0.000232 | 9  |
| MF | GO:0030246 | 23/606 | 267/18337 | 2.88E-05 | 0.000303 | 0.000235 | 23 |
| MF | GO:0004857 | 29/606 | 385/18337 | 3.49E-05 | 0.00036  | 0.000279 | 29 |
| MF | GO:0004713 | 15/606 | 135/18337 | 4.08E-05 | 0.000414 | 0.000321 | 15 |
| MF | GO:0033691 | 6/606  | 22/18337  | 6.03E-05 | 0.000603 | 0.000468 | 6  |
| MF | GO:0061135 | 18/606 | 192/18337 | 7.09E-05 | 0.000698 | 0.000542 | 18 |
| MF | GO:0017134 | 6/606  | 23/18337  | 7.93E-05 | 0.000768 | 0.000596 | 6  |
| MF | GO:0004866 | 17/606 | 180/18337 | 0.000102 | 0.000966 | 0.000749 | 17 |

|    |            |        |           |          |          |          |    |
|----|------------|--------|-----------|----------|----------|----------|----|
| MF | GO:0005160 | 6/606  | 24/18337  | 0.000103 | 0.000966 | 0.000749 | 6  |
| MF | GO:0003953 | 5/606  | 16/18337  | 0.000125 | 0.001092 | 0.000848 | 5  |
| MF | GO:0019841 | 5/606  | 16/18337  | 0.000125 | 0.001092 | 0.000848 | 5  |
| MF | GO:0050135 | 5/606  | 16/18337  | 0.000125 | 0.001092 | 0.000848 | 5  |
| MF | GO:0050664 | 5/606  | 16/18337  | 0.000125 | 0.001092 | 0.000848 | 5  |
| MF | GO:0061809 | 5/606  | 16/18337  | 0.000125 | 0.001092 | 0.000848 | 5  |
| MF | GO:0005104 | 6/606  | 25/18337  | 0.000132 | 0.001133 | 0.000879 | 6  |
| MF | GO:0019207 | 19/606 | 220/18337 | 0.000135 | 0.001149 | 0.000892 | 19 |
| MF | GO:0004714 | 9/606  | 61/18337  | 0.000166 | 0.001388 | 0.001077 | 9  |
| MF | GO:0017171 | 17/606 | 188/18337 | 0.000174 | 0.001434 | 0.001113 | 17 |
| MF | GO:0019887 | 17/606 | 190/18337 | 0.000197 | 0.001607 | 0.001247 | 17 |
| MF | GO:0042834 | 5/606  | 18/18337  | 0.000232 | 0.00187  | 0.001451 | 5  |
| MF | GO:0008236 | 16/606 | 186/18337 | 0.000467 | 0.003689 | 0.002862 | 16 |
| MF | GO:0004252 | 15/606 | 168/18337 | 0.00047  | 0.003689 | 0.002862 | 15 |
| MF | GO:0004869 | 8/606  | 56/18337  | 0.000476 | 0.003691 | 0.002864 | 8  |
| MF | GO:0001530 | 6/606  | 32/18337  | 0.000553 | 0.004233 | 0.003284 | 6  |
| MF | GO:0030971 | 9/606  | 72/18337  | 0.00059  | 0.004457 | 0.003458 | 9  |
| MF | GO:0039706 | 4/606  | 13/18337  | 0.000665 | 0.004912 | 0.003811 | 4  |
| MF | GO:0070700 | 4/606  | 13/18337  | 0.000665 | 0.004912 | 0.003811 | 4  |
| MF | GO:0005178 | 13/606 | 142/18337 | 0.000871 | 0.006353 | 0.004929 | 13 |
| MF | GO:0070696 | 5/606  | 24/18337  | 0.000978 | 0.00705  | 0.00547  | 5  |
| MF | GO:0042923 | 5/606  | 25/18337  | 0.001189 | 0.008396 | 0.006514 | 5  |
| MF | GO:0031406 | 15/606 | 184/18337 | 0.001203 | 0.008396 | 0.006514 | 15 |
| MF | GO:0048185 | 4/606  | 15/18337  | 0.001205 | 0.008396 | 0.006514 | 4  |
| MF | GO:0001540 | 9/606  | 84/18337  | 0.001798 | 0.01225  | 0.009505 | 9  |
| MF | GO:0030295 | 9/606  | 84/18337  | 0.001798 | 0.01225  | 0.009505 | 9  |
| MF | GO:0051427 | 14/606 | 173/18337 | 0.001854 | 0.012493 | 0.009693 | 14 |
| MF | GO:0030169 | 4/606  | 17/18337  | 0.001994 | 0.013293 | 0.010314 | 4  |
| MF | GO:0043178 | 9/606  | 86/18337  | 0.002119 | 0.013978 | 0.010846 | 9  |
| MF | GO:0033293 | 8/606  | 71/18337  | 0.002315 | 0.015111 | 0.011724 | 8  |
| MF | GO:0016500 | 4/606  | 18/18337  | 0.002497 | 0.015962 | 0.012384 | 4  |
| MF | GO:0016918 | 4/606  | 18/18337  | 0.002497 | 0.015962 | 0.012384 | 4  |
| MF | GO:0071813 | 5/606  | 30/18337  | 0.002785 | 0.017439 | 0.01353  | 5  |
| MF | GO:0071814 | 5/606  | 30/18337  | 0.002785 | 0.017439 | 0.01353  | 5  |
| MF | GO:0019209 | 9/606  | 90/18337  | 0.002898 | 0.01797  | 0.013943 | 9  |
| MF | GO:0004955 | 3/606  | 10/18337  | 0.003622 | 0.021804 | 0.016918 | 3  |
| MF | GO:0005031 | 3/606  | 10/18337  | 0.003622 | 0.021804 | 0.016918 | 3  |
| MF | GO:0017002 | 3/606  | 10/18337  | 0.003622 | 0.021804 | 0.016918 | 3  |
| MF | GO:0001972 | 4/606  | 20/18337  | 0.003752 | 0.022369 | 0.017356 | 4  |
| MF | GO:0001848 | 4/606  | 21/18337  | 0.004516 | 0.026411 | 0.020492 | 4  |
| MF | GO:0051428 | 4/606  | 21/18337  | 0.004516 | 0.026411 | 0.020492 | 4  |
| MF | GO:0004954 | 3/606  | 11/18337  | 0.004859 | 0.027896 | 0.021644 | 3  |
| MF | GO:0019864 | 3/606  | 11/18337  | 0.004859 | 0.027896 | 0.021644 | 3  |
| MF | GO:0043027 | 4/606  | 22/18337  | 0.005377 | 0.030583 | 0.023729 | 4  |
| MF | GO:0016860 | 6/606  | 50/18337  | 0.005874 | 0.03311  | 0.02569  | 6  |
| MF | GO:0043394 | 5/606  | 36/18337  | 0.006262 | 0.033893 | 0.026297 | 5  |
| MF | GO:0004875 | 3/606  | 12/18337  | 0.006321 | 0.033893 | 0.026297 | 3  |
| MF | GO:0005035 | 3/606  | 12/18337  | 0.006321 | 0.033893 | 0.026297 | 3  |
| MF | GO:0017154 | 3/606  | 12/18337  | 0.006321 | 0.033893 | 0.026297 | 3  |

|      |            |        |           |          |          |          |    |
|------|------------|--------|-----------|----------|----------|----------|----|
| MF   | GO:0089720 | 3/606  | 12/18337  | 0.006321 | 0.033893 | 0.026297 | 3  |
| MF   | GO:0009931 | 4/606  | 23/18337  | 0.006341 | 0.033893 | 0.026297 | 4  |
| MF   | GO:0005504 | 5/606  | 37/18337  | 0.007048 | 0.037061 | 0.028755 | 5  |
| MF   | GO:0005518 | 7/606  | 68/18337  | 0.007053 | 0.037061 | 0.028755 | 7  |
| MF   | GO:0010857 | 4/606  | 24/18337  | 0.007414 | 0.038627 | 0.02997  | 4  |
| MF   | GO:0016799 | 5/606  | 38/18337  | 0.0079   | 0.040748 | 0.031616 | 5  |
| MF   | GO:0036122 | 3/606  | 13/18337  | 0.008018 | 0.040748 | 0.031616 | 3  |
| MF   | GO:0061783 | 3/606  | 13/18337  | 0.008018 | 0.040748 | 0.031616 | 3  |
| MF   | GO:0050840 | 6/606  | 55/18337  | 0.009335 | 0.047053 | 0.036508 | 6  |
| MF   | GO:0003707 | 4/606  | 26/18337  | 0.009903 | 0.048611 | 0.037717 | 4  |
| MF   | GO:0005041 | 3/606  | 14/18337  | 0.009957 | 0.048611 | 0.037717 | 3  |
| MF   | GO:0005172 | 3/606  | 14/18337  | 0.009957 | 0.048611 | 0.037717 | 3  |
| MF   | GO:0044548 | 3/606  | 14/18337  | 0.009957 | 0.048611 | 0.037717 | 3  |
| MF   | GO:0045309 | 6/606  | 56/18337  | 0.010171 | 0.048886 | 0.037931 | 6  |
| MF   | GO:0019903 | 11/606 | 148/18337 | 0.010172 | 0.048886 | 0.037931 | 11 |
| MF   | GO:0004953 | 3/606  | 15/18337  | 0.012145 | 0.057924 | 0.044943 | 3  |
| MF   | GO:0046625 | 4/606  | 28/18337  | 0.012877 | 0.060945 | 0.047286 | 4  |
| KEGG | hsa04060   | 89/395 | 295/8102  | 2.73E-48 | 6.85E-46 | 4.91E-46 | 89 |
| KEGG | hsa04061   | 37/395 | 100/8102  | 1.14E-23 | 1.43E-21 | 1.03E-21 | 37 |
| KEGG | hsa04080   | 55/395 | 350/8102  | 3.65E-15 | 3.06E-13 | 2.19E-13 | 55 |
| KEGG | hsa04062   | 37/395 | 192/8102  | 2.97E-13 | 1.86E-11 | 1.34E-11 | 37 |
| KEGG | hsa04630   | 32/395 | 162/8102  | 6.47E-12 | 3.25E-10 | 2.33E-10 | 32 |
| KEGG | hsa04657   | 21/395 | 94/8102   | 2.94E-09 | 1.23E-07 | 8.83E-08 | 21 |
| KEGG | hsa05323   | 19/395 | 93/8102   | 7.89E-08 | 2.83E-06 | 2.03E-06 | 19 |
| KEGG | hsa04610   | 18/395 | 85/8102   | 9.76E-08 | 3.06E-06 | 2.20E-06 | 18 |
| KEGG | hsa05417   | 29/395 | 215/8102  | 5.15E-07 | 1.44E-05 | 1.03E-05 | 29 |
| KEGG | hsa04064   | 18/395 | 104/8102  | 2.28E-06 | 5.73E-05 | 4.11E-05 | 18 |
| KEGG | hsa05171   | 28/395 | 232/8102  | 7.49E-06 | 0.000171 | 0.000122 | 28 |
| KEGG | hsa04380   | 19/395 | 128/8102  | 1.24E-05 | 0.00026  | 0.000186 | 19 |
| KEGG | hsa04010   | 32/395 | 294/8102  | 1.48E-05 | 0.000286 | 0.000205 | 32 |
| KEGG | hsa04668   | 17/395 | 112/8102  | 2.65E-05 | 0.000471 | 0.000337 | 17 |
| KEGG | hsa04621   | 23/395 | 184/8102  | 2.81E-05 | 0.000471 | 0.000337 | 23 |
| KEGG | hsa04151   | 35/395 | 354/8102  | 4.64E-05 | 0.000727 | 0.000522 | 35 |
| KEGG | hsa04014   | 26/395 | 232/8102  | 5.81E-05 | 0.000858 | 0.000615 | 26 |
| KEGG | hsa04360   | 22/395 | 182/8102  | 7.02E-05 | 0.000978 | 0.000702 | 22 |
| KEGG | hsa04015   | 24/395 | 210/8102  | 8.20E-05 | 0.001084 | 0.000777 | 24 |
| KEGG | hsa04933   | 15/395 | 100/8102  | 9.04E-05 | 0.001135 | 0.000814 | 15 |
| KEGG | hsa05144   | 10/395 | 50/8102   | 0.00012  | 0.001391 | 0.000998 | 10 |
| KEGG | hsa05169   | 23/395 | 202/8102  | 0.000122 | 0.001391 | 0.000998 | 23 |
| KEGG | hsa05218   | 12/395 | 72/8102   | 0.000164 | 0.001746 | 0.001252 | 12 |
| KEGG | hsa04350   | 14/395 | 94/8102   | 0.000167 | 0.001746 | 0.001252 | 14 |
| KEGG | hsa05133   | 12/395 | 76/8102   | 0.000278 | 0.00279  | 0.002001 | 12 |
| KEGG | hsa01521   | 12/395 | 79/8102   | 0.000402 | 0.003746 | 0.002686 | 12 |
| KEGG | hsa05418   | 17/395 | 139/8102  | 0.000403 | 0.003746 | 0.002686 | 17 |
| KEGG | hsa04620   | 14/395 | 104/8102  | 0.000489 | 0.004381 | 0.003142 | 14 |
| KEGG | hsa04650   | 16/395 | 131/8102  | 0.000602 | 0.005208 | 0.003734 | 16 |
| KEGG | hsa04614   | 6/395  | 23/8102   | 0.000643 | 0.005377 | 0.003856 | 6  |
| KEGG | hsa04024   | 22/395 | 219/8102  | 0.000979 | 0.007928 | 0.005686 | 22 |
| KEGG | hsa05167   | 20/395 | 194/8102  | 0.001198 | 0.009396 | 0.006739 | 20 |

|      |          |        |          |          |          |          |    |
|------|----------|--------|----------|----------|----------|----------|----|
| KEGG | hsa04020 | 23/395 | 240/8102 | 0.001434 | 0.010909 | 0.007823 | 23 |
| KEGG | hsa04924 | 10/395 | 69/8102  | 0.001745 | 0.012884 | 0.009239 | 10 |
| KEGG | hsa04270 | 15/395 | 134/8102 | 0.002152 | 0.015433 | 0.011067 | 15 |
| KEGG | hsa05150 | 12/395 | 96/8102  | 0.002325 | 0.016141 | 0.011575 | 12 |
| KEGG | hsa04066 | 13/395 | 109/8102 | 0.002379 | 0.016141 | 0.011575 | 13 |
| KEGG | hsa04012 | 11/395 | 85/8102  | 0.002652 | 0.017516 | 0.012561 | 11 |
| KEGG | hsa04145 | 16/395 | 152/8102 | 0.002926 | 0.018831 | 0.013504 | 16 |
| KEGG | hsa05219 | 7/395  | 41/8102  | 0.003312 | 0.020781 | 0.014903 | 7  |
| KEGG | hsa05146 | 12/395 | 102/8102 | 0.003869 | 0.023683 | 0.016984 | 12 |
| KEGG | hsa04625 | 12/395 | 104/8102 | 0.004536 | 0.027109 | 0.01944  | 12 |
| KEGG | hsa04928 | 12/395 | 106/8102 | 0.005293 | 0.030895 | 0.022156 | 12 |
| KEGG | hsa05161 | 16/395 | 162/8102 | 0.005485 | 0.031291 | 0.02244  | 16 |
| KEGG | hsa05226 | 15/395 | 149/8102 | 0.005928 | 0.032892 | 0.023588 | 15 |
| KEGG | hsa05134 | 8/395  | 57/8102  | 0.006028 | 0.032892 | 0.023588 | 8  |
| KEGG | hsa05207 | 19/395 | 212/8102 | 0.007453 | 0.039801 | 0.028542 | 19 |
| KEGG | hsa05162 | 14/395 | 139/8102 | 0.007685 | 0.040188 | 0.02882  | 14 |
| KEGG | hsa05223 | 9/395  | 72/8102  | 0.007934 | 0.040642 | 0.029146 | 9  |
| KEGG | hsa05143 | 6/395  | 37/8102  | 0.008316 | 0.041748 | 0.029939 | 6  |
| KEGG | hsa04640 | 11/395 | 99/8102  | 0.008538 | 0.042018 | 0.030133 | 11 |
| KEGG | hsa04672 | 7/395  | 49/8102  | 0.009064 | 0.043754 | 0.031377 | 7  |
| KEGG | hsa05340 | 6/395  | 38/8102  | 0.00948  | 0.044898 | 0.032198 | 6  |
| KEGG | hsa04926 | 13/395 | 129/8102 | 0.009976 | 0.046369 | 0.033253 | 13 |
| KEGG | hsa05214 | 9/395  | 75/8102  | 0.010305 | 0.047028 | 0.033725 | 9  |
| KEGG | hsa05166 | 19/395 | 222/8102 | 0.011917 | 0.053413 | 0.038304 | 19 |
| KEGG | hsa05224 | 14/395 | 147/8102 | 0.012306 | 0.054189 | 0.03886  | 14 |
| KEGG | hsa04072 | 14/395 | 148/8102 | 0.013009 | 0.056299 | 0.040374 | 14 |
| KEGG | hsa05163 | 19/395 | 225/8102 | 0.013607 | 0.057887 | 0.041512 | 19 |

Table.S2 GO terms and KEGG pathways enriched in blue modules

| ONTOLOGY | ID         | GeneRatio | BgRatio   | pvalue      | p.adjust    | qvalue      | Count |
|----------|------------|-----------|-----------|-------------|-------------|-------------|-------|
| BP       | GO:0006958 | 87/182    | 141/18862 | 2.4557E-147 | 3.6221E-144 | 3.2208E-144 | 87    |
| BP       | GO:0002455 | 88/182    | 156/18862 | 4.8384E-144 | 3.5683E-141 | 3.1729E-141 | 88    |
| BP       | GO:0006956 | 88/182    | 178/18862 | 6.0405E-137 | 2.9699E-134 | 2.6408E-134 | 88    |
| BP       | GO:0019724 | 92/182    | 226/18862 | 1.4914E-133 | 5.4994E-131 | 4.8901E-131 | 92    |
| BP       | GO:0016064 | 91/182    | 223/18862 | 4.4402E-132 | 1.3098E-129 | 1.1647E-129 | 91    |
| BP       | GO:0002460 | 96/182    | 367/18862 | 6.6263E-118 | 1.629E-115  | 1.4485E-115 | 96    |
| BP       | GO:0006959 | 95/182    | 380/18862 | 2.1038E-114 | 4.4329E-112 | 3.9418E-112 | 95    |
| BP       | GO:0002449 | 93/182    | 360/18862 | 3.3538E-113 | 6.1836E-111 | 5.4985E-111 | 93    |
| BP       | GO:0002377 | 78/182    | 198/18862 | 3.2536E-110 | 5.3323E-108 | 4.7415E-108 | 78    |
| BP       | GO:0006909 | 89/182    | 381/18862 | 2.096E-103  | 3.0915E-101 | 2.749E-101  | 89    |
| BP       | GO:0002440 | 79/182    | 286/18862 | 3.61E-97    | 4.84E-95    | 4.31E-95    | 79    |
| BP       | GO:0002429 | 90/182    | 481/18862 | 3.46E-95    | 3.93E-93    | 3.49E-93    | 90    |
| BP       | GO:0002757 | 90/182    | 481/18862 | 3.46E-95    | 3.93E-93    | 3.49E-93    | 90    |
| BP       | GO:0030449 | 58/182    | 115/18862 | 1.05E-88    | 1.11E-86    | 9.87E-87    | 58    |
| BP       | GO:0002920 | 60/182    | 138/18862 | 9.55E-87    | 9.39E-85    | 8.35E-85    | 60    |
| BP       | GO:0006910 | 53/182    | 98/18862  | 4.82E-83    | 4.44E-81    | 3.95E-81    | 53    |
| BP       | GO:0002433 | 57/182    | 139/18862 | 2.18E-80    | 1.79E-78    | 1.59E-78    | 57    |

|    |            |        |           |             |             |             |    |
|----|------------|--------|-----------|-------------|-------------|-------------|----|
| BP | GO:0038096 | 57/182 | 139/18862 | 2.18E-80    | 1.79E-78    | 1.59E-78    | 57 |
| BP | GO:0038094 | 57/182 | 140/18862 | 3.65E-80    | 2.84E-78    | 2.52E-78    | 57 |
| BP | GO:0050853 | 56/182 | 134/18862 | 1.65E-79    | 1.22E-77    | 1.08E-77    | 56 |
| BP | GO:0002431 | 57/182 | 145/18862 | 4.50E-79    | 3.16E-77    | 2.81E-77    | 57 |
| BP | GO:0050871 | 56/182 | 150/18862 | 4.43E-76    | 2.97E-74    | 2.64E-74    | 56 |
| BP | GO:0006911 | 53/182 | 126/18862 | 2.69E-75    | 1.72E-73    | 1.53E-73    | 53 |
| BP | GO:0099024 | 53/182 | 135/18862 | 2.69E-73    | 1.66E-71    | 1.47E-71    | 53 |
| BP | GO:0050864 | 58/182 | 193/18862 | 2.23E-72    | 1.32E-70    | 1.17E-70    | 58 |
| BP | GO:0010324 | 53/182 | 143/18862 | 1.17E-71    | 6.64E-70    | 5.90E-70    | 53 |
| BP | GO:0038095 | 53/182 | 169/18862 | 4.75E-67    | 2.60E-65    | 2.31E-65    | 53 |
| BP | GO:0038093 | 57/182 | 239/18862 | 1.43E-64    | 7.52E-63    | 6.69E-63    | 57 |
| BP | GO:0042113 | 62/182 | 326/18862 | 7.12E-64    | 3.62E-62    | 3.22E-62    | 62 |
| BP | GO:0051251 | 62/182 | 356/18862 | 2.41E-61    | 1.18E-59    | 1.05E-59    | 62 |
| BP | GO:0008037 | 54/182 | 232/18862 | 2.12E-60    | 1.01E-58    | 8.96E-59    | 54 |
| BP | GO:0002697 | 65/182 | 465/18862 | 5.09E-58    | 2.34E-56    | 2.08E-56    | 65 |
| BP | GO:0002696 | 62/182 | 401/18862 | 5.65E-58    | 2.53E-56    | 2.25E-56    | 62 |
| BP | GO:0006898 | 58/182 | 328/18862 | 1.41E-57    | 6.12E-56    | 5.44E-56    | 58 |
| BP | GO:0050867 | 62/182 | 412/18862 | 3.24E-57    | 1.37E-55    | 1.22E-55    | 62 |
| BP | GO:0050851 | 56/182 | 323/18862 | 5.50E-55    | 2.25E-53    | 2.00E-53    | 56 |
| BP | GO:0042742 | 57/182 | 344/18862 | 7.80E-55    | 3.11E-53    | 2.77E-53    | 57 |
| BP | GO:0019730 | 9/182  | 142/18862 | 9.88E-06    | 0.000383434 | 0.000340952 | 9  |
| BP | GO:0070098 | 7/182  | 88/18862  | 2.28E-05    | 0.000862396 | 0.000766848 | 7  |
| BP | GO:1990868 | 7/182  | 97/18862  | 4.29E-05    | 0.001543412 | 0.001372411 | 7  |
| BP | GO:1990869 | 7/182  | 97/18862  | 4.29E-05    | 0.001543412 | 0.001372411 | 7  |
| BP | GO:0045625 | 3/182  | 10/18862  | 0.000100883 | 0.003542929 | 0.003150394 | 3  |
| BP | GO:0031295 | 5/182  | 57/18862  | 0.000220804 | 0.007480942 | 0.006652099 | 5  |
| BP | GO:0050870 | 9/182  | 212/18862 | 0.00022316  | 0.007480942 | 0.006652099 | 9  |
| BP | GO:0045785 | 13/182 | 425/18862 | 0.000256062 | 0.008334876 | 0.007411422 | 13 |
| BP | GO:0031294 | 5/182  | 59/18862  | 0.000259935 | 0.008334876 | 0.007411422 | 5  |
| BP | GO:0019731 | 5/182  | 61/18862  | 0.000304121 | 0.009544208 | 0.008486768 | 5  |
| BP | GO:0022409 | 10/182 | 276/18862 | 0.000359743 | 0.011054613 | 0.009829829 | 10 |
| BP | GO:0042102 | 6/182  | 99/18862  | 0.000396311 | 0.011929759 | 0.010608014 | 6  |
| BP | GO:1903039 | 9/182  | 234/18862 | 0.000460549 | 0.013586195 | 0.012080927 | 9  |
| BP | GO:0030593 | 6/182  | 103/18862 | 0.000489921 | 0.014169275 | 0.012599405 | 6  |
| BP | GO:0045622 | 4/182  | 39/18862  | 0.000529831 | 0.015028865 | 0.013363758 | 4  |
| BP | GO:0045580 | 7/182  | 146/18862 | 0.000545377 | 0.015177948 | 0.013496323 | 7  |
| BP | GO:0045063 | 3/182  | 18/18862  | 0.000648071 | 0.017701942 | 0.015740674 | 3  |
| BP | GO:1903131 | 12/182 | 411/18862 | 0.000666976 | 0.017887082 | 0.015905302 | 12 |
| BP | GO:0070661 | 10/182 | 312/18862 | 0.000928852 | 0.024465311 | 0.021754703 | 10 |
| BP | GO:0061844 | 5/182  | 78/18862  | 0.000945897 | 0.024477158 | 0.021765237 | 5  |
| BP | GO:0001895 | 5/182  | 80/18862  | 0.001060584 | 0.026601175 | 0.023653926 | 5  |
| BP | GO:0030574 | 4/182  | 47/18862  | 0.001082082 | 0.026601175 | 0.023653926 | 4  |
| BP | GO:0097028 | 4/182  | 47/18862  | 0.001082082 | 0.026601175 | 0.023653926 | 4  |
| BP | GO:0034612 | 10/182 | 320/18862 | 0.001124348 | 0.027187113 | 0.024174946 | 10 |
| BP | GO:1990266 | 6/182  | 123/18862 | 0.001242864 | 0.029141782 | 0.02591305  | 6  |
| BP | GO:0042129 | 7/182  | 168/18862 | 0.0012447   | 0.029141782 | 0.02591305  | 7  |
| BP | GO:0070231 | 4/182  | 49/18862  | 0.001266282 | 0.029183848 | 0.025950454 | 4  |
| BP | GO:0071621 | 6/182  | 124/18862 | 0.001295782 | 0.029404283 | 0.026146467 | 6  |
| BP | GO:0050863 | 10/182 | 327/18862 | 0.001321906 | 0.029542585 | 0.026269446 | 10 |

|    |            |         |           |             |             |             |     |
|----|------------|---------|-----------|-------------|-------------|-------------|-----|
| BP | GO:1903037 | 10/182  | 330/18862 | 0.001414817 | 0.03114709  | 0.027696181 | 10  |
| BP | GO:0043370 | 4/182   | 51/18862  | 0.001471354 | 0.031915407 | 0.028379373 | 4   |
| BP | GO:0033209 | 7/182   | 174/18862 | 0.001523251 | 0.032461303 | 0.028864787 | 7   |
| BP | GO:0003094 | 3/182   | 24/18862  | 0.001540536 | 0.032461303 | 0.028864787 | 3   |
| BP | GO:0045619 | 7/182   | 175/18862 | 0.001574054 | 0.032590731 | 0.028979876 | 7   |
| BP | GO:1902105 | 9/182   | 279/18862 | 0.001591699 | 0.032590731 | 0.028979876 | 9   |
| BP | GO:0030595 | 8/182   | 226/18862 | 0.001612965 | 0.032590731 | 0.028979876 | 8   |
| BP | GO:0046651 | 9/182   | 282/18862 | 0.001712501 | 0.034134311 | 0.030352436 | 9   |
| BP | GO:0097205 | 3/182   | 25/18862  | 0.001738264 | 0.034185856 | 0.030398271 | 3   |
| BP | GO:0032943 | 9/182   | 285/18862 | 0.001840551 | 0.035721221 | 0.031763527 | 9   |
| BP | GO:0050671 | 6/182   | 135/18862 | 0.001998491 | 0.038282785 | 0.034041284 | 6   |
| BP | GO:0032946 | 6/182   | 136/18862 | 0.002074308 | 0.039225687 | 0.034879719 | 6   |
| BP | GO:0002825 | 3/182   | 27/18862  | 0.00217957  | 0.040185821 | 0.035733476 | 3   |
| BP | GO:0033688 | 3/182   | 27/18862  | 0.00217957  | 0.040185821 | 0.035733476 | 3   |
| BP | GO:0071356 | 9/182   | 296/18862 | 0.002377149 | 0.042784794 | 0.038044498 | 9   |
| BP | GO:0042100 | 5/182   | 96/18862  | 0.002383124 | 0.042784794 | 0.038044498 | 5   |
| BP | GO:0070663 | 8/182   | 241/18862 | 0.002407551 | 0.042784794 | 0.038044498 | 8   |
| BP | GO:0030098 | 10/182  | 358/18862 | 0.002565615 | 0.045050981 | 0.040059606 | 10  |
| BP | GO:0042098 | 7/182   | 195/18862 | 0.002896997 | 0.050271416 | 0.044701648 | 7   |
| BP | GO:0034694 | 3/182   | 30/18862  | 0.002961878 | 0.050296625 | 0.044724064 | 3   |
| BP | GO:0060326 | 9/182   | 306/18862 | 0.002966648 | 0.050296625 | 0.044724064 | 9   |
| BP | GO:0007159 | 10/182  | 366/18862 | 0.00300519  | 0.050371089 | 0.044790278 | 10  |
| BP | GO:0071887 | 5/182   | 102/18862 | 0.003100677 | 0.05127399  | 0.045593143 | 5   |
| BP | GO:0070665 | 6/182   | 148/18862 | 0.003163344 | 0.05127399  | 0.045593143 | 6   |
| BP | GO:0097530 | 6/182   | 148/18862 | 0.003163344 | 0.05127399  | 0.045593143 | 6   |
| BP | GO:0007204 | 9/182   | 310/18862 | 0.003232522 | 0.051825768 | 0.046083788 | 9   |
| BP | GO:0050777 | 6/182   | 150/18862 | 0.003379806 | 0.052712379 | 0.046872167 | 6   |
| BP | GO:0042093 | 4/182   | 64/18862  | 0.003395035 | 0.052712379 | 0.046872167 | 4   |
| BP | GO:0048247 | 4/182   | 64/18862  | 0.003395035 | 0.052712379 | 0.046872167 | 4   |
| BP | GO:0022407 | 11/182  | 437/18862 | 0.003534615 | 0.054251836 | 0.048241062 | 11  |
| BP | GO:0033687 | 3/182   | 32/18862  | 0.003567748 | 0.054251836 | 0.048241062 | 3   |
| CC | GO:0019814 | 132/182 | 167/19520 | 1.8301E-261 | 1.9399E-259 | 1.9265E-259 | 132 |
| CC | GO:0042571 | 54/182  | 77/19520  | 7.98E-95    | 4.23E-93    | 4.20E-93    | 54  |
| CC | GO:0009897 | 66/182  | 402/19520 | 9.72E-65    | 3.44E-63    | 3.41E-63    | 66  |
| CC | GO:0072562 | 29/182  | 146/19520 | 1.74E-30    | 4.61E-29    | 4.58E-29    | 29  |
| MF | GO:0003823 | 83/132  | 165/18337 | 7.17E-145   | 1.10E-142   | 9.35E-143   | 83  |
| MF | GO:0034987 | 53/132  | 79/18337  | 6.92E-99    | 5.30E-97    | 4.52E-97    | 53  |
| MF | GO:0005125 | 12/132  | 235/18337 | 1.33E-07    | 6.81E-06    | 5.81E-06    | 12  |
| MF | GO:0008009 | 6/132   | 49/18337  | 1.35E-06    | 5.15E-05    | 4.39E-05    | 6   |
| MF | GO:0005126 | 11/132  | 270/18337 | 4.13E-06    | 0.000126407 | 0.000107839 | 11  |
| MF | GO:0045236 | 4/132   | 18/18337  | 7.26E-06    | 0.000185121 | 0.000157929 | 4   |
| MF | GO:0042379 | 6/132   | 69/18337  | 1.03E-05    | 0.000210702 | 0.000179753 | 6   |
| MF | GO:0048018 | 14/132  | 486/18337 | 1.10E-05    | 0.000210702 | 0.000179753 | 14  |
| MF | GO:0030546 | 14/132  | 492/18337 | 1.26E-05    | 0.000214924 | 0.000183354 | 14  |
| MF | GO:0019955 | 6/132   | 136/18337 | 0.000454249 | 0.006950009 | 0.005929145 | 6   |
| MF | GO:0001664 | 8/132   | 289/18337 | 0.001179002 | 0.016398841 | 0.013990067 | 8   |
| MF | GO:0005164 | 3/132   | 31/18337  | 0.001414288 | 0.018032167 | 0.015383479 | 3   |
| MF | GO:0016175 | 2/132   | 11/18337  | 0.002710796 | 0.031903982 | 0.027217708 | 2   |
| MF | GO:0048020 | 3/132   | 46/18337  | 0.004415674 | 0.048257012 | 0.041168693 | 3   |

|      |            |       |           |             |             |             |    |
|------|------------|-------|-----------|-------------|-------------|-------------|----|
| MF   | GO:0032813 | 3/132 | 49/18337  | 0.005276101 | 0.053816228 | 0.045911333 | 3  |
| MF   | GO:0050664 | 2/132 | 16/18337  | 0.005776835 | 0.055240981 | 0.047126809 | 2  |
| MF   | GO:0005539 | 6/132 | 228/18337 | 0.006181965 | 0.055637682 | 0.047465239 | 6  |
| MF   | GO:0008201 | 5/132 | 164/18337 | 0.006696695 | 0.056921903 | 0.048560826 | 5  |
| KEGG | hsa04060   | 17/37 | 295/8102  | 1.82E-15    | 2.27E-13    | 2.01E-13    | 17 |
| KEGG | hsa04061   | 9/37  | 100/8102  | 4.31E-10    | 2.70E-08    | 2.38E-08    | 9  |
| KEGG | hsa04062   | 8/37  | 192/8102  | 1.84E-06    | 7.67E-05    | 6.78E-05    | 8  |
| KEGG | hsa05340   | 4/37  | 38/8102   | 2.43E-05    | 0.00076     | 0.000672    | 4  |
| KEGG | hsa04672   | 3/37  | 49/8102   | 0.001398    | 0.03495     | 0.030903    | 3  |

Table S3. Correlation between IRGPI subgroups and clinicopathological factors in the TCGA cohort

| Id           | futime | fustat | Age | Gender | Stage      | T   | M      | N  |
|--------------|--------|--------|-----|--------|------------|-----|--------|----|
| TCGA-J2-8192 | 739    | 0      | 65  | FEMALE | Stage IIA  | T2a | MX     | N1 |
| TCGA-91-8499 | 36     | 0      | 76  | FEMALE | Stage IA   | T1b | MX     | N0 |
| TCGA-53-7624 | 1043   | 1      | 40  | FEMALE | Stage IV   | T2  | M1     | N0 |
| TCGA-55-6986 | 3261   | 0      | 74  | FEMALE | Stage IB   | T2  | M0     | N0 |
| TCGA-38-4632 | 1357   | 1      | 42  | MALE   | Stage IV   | T2  | M1     | N1 |
| TCGA-78-7146 | 173    | 1      | 71  | FEMALE | Stage IIIA | T2  | M0     | N2 |
| TCGA-NJ-A4YG | 2261   | 0      | 65  | MALE   | Stage IB   | T2  | M0     | N0 |
| TCGA-86-8279 | 949    | 0      | 46  | MALE   | Stage IIA  | T2a | M0     | N1 |
| TCGA-50-6591 | 119    | 1      | 63  | FEMALE | Stage IV   | T2  | M1     | N0 |
| TCGA-50-5939 | 460    | 1      | 85  | MALE   | Stage IB   | T2  | M0     | N0 |
| TCGA-62-8402 | 1498   | 1      | 73  | FEMALE | Stage IIIA | T2  | M0     | N2 |
| TCGA-49-4506 | 999    | 1      | 68  | FEMALE | Stage IIB  | T2  | M0     | N1 |
| TCGA-91-6847 | 842    | 0      | 62  | FEMALE | Stage IB   | T2  | MX     | N0 |
| TCGA-97-8547 | 657    | 0      | 78  | FEMALE | Stage IIIA | T2a | MX     | N2 |
| TCGA-97-7546 | 1285   | 0      | 76  | FEMALE | Stage IA   | T1  | MX     | N0 |
| TCGA-73-4659 | 711    | 1      | 66  | MALE   | Stage IIIA | T2  | M0     | N2 |
| TCGA-55-A48Y | 630    | 0      | 69  | MALE   | Stage IIA  | T2b | M0     | N0 |
| TCGA-50-5049 | 3094   | 0      | 70  | MALE   | Stage IA   | T2  | M0     | N0 |
| TCGA-44-3396 | 1130   | 0      | 74  | FEMALE | Stage IIIA | T2  | M0     | N2 |
| TCGA-05-4405 | 610    | 0      | 74  | FEMALE | Stage IB   | T2  | M0     | N0 |
| TCGA-78-8662 | 3361   | 1      | 53  | FEMALE | Stage IB   | T2  | M0     | N0 |
| TCGA-50-8460 | 829    | 0      | 74  | MALE   | Stage IA   | T1a | M0     | N0 |
| TCGA-55-8087 | 462    | 0      | 59  | FEMALE | Stage IB   | T2a | MX     | N0 |
| TCGA-MP-A4TA | 950    | 1      | 75  | FEMALE | Stage IA   | T1  | M0     | N0 |
| TCGA-55-7815 | 773    | 0      | 76  | MALE   | Stage IB   | T2a | MX     | N0 |
| TCGA-55-8096 | 719    | 1      | 67  | FEMALE | Stage IB   | T2a | MX     | N0 |
| TCGA-NJ-A55R | 603    | 0      | 67  | MALE   | Stage IA   | T1b | MX     | N0 |
| TCGA-91-7771 | 492    | 0      | 62  | MALE   | Stage IIB  | T3  | MX     | N0 |
| TCGA-69-7760 | 202    | 0      | 73  | MALE   | Stage IIB  | T3  | M0     | N0 |
| TCGA-44-5644 | 863    | 0      | 51  | FEMALE | Stage IB   | T2a | unknow | N0 |
| TCGA-69-7973 | 230    | 0      | 42  | FEMALE | Stage IB   | T2a | M0     | N0 |
| TCGA-44-6145 | 595    | 0      | 62  | FEMALE | Stage IA   | T1  | M0     | N0 |
| TCGA-64-1676 | 1728   | 0      | 58  | MALE   | Stage IA   | T1a | M0     | N0 |



|              |      |   |        |        |            |     |    |    |
|--------------|------|---|--------|--------|------------|-----|----|----|
| TCGA-97-7553 | 1870 | 0 | 58     | FEMALE | Stage IA   | T1  | MX | N0 |
| TCGA-55-8511 | 552  | 0 | 73     | FEMALE | Stage IB   | T2a | MX | N0 |
| TCGA-MP-A4TF | 336  | 1 | 58     | FEMALE | Stage IIA  | T2b | M0 | N0 |
| TCGA-55-8204 | 515  | 0 | 87     | FEMALE | Stage IB   | T2a | MX | N0 |
| TCGA-55-8616 | 48   | 0 | 58     | FEMALE | Stage IB   | T2a | M0 | N0 |
| TCGA-86-8281 | 0    | 0 | 75     | MALE   | Stage IA   | T1  | M0 | NX |
| TCGA-55-7574 | 995  | 1 | 64     | FEMALE | Stage IB   | T2a | M0 | N0 |
| TCGA-L9-A743 | 664  | 0 | 56     | MALE   | Stage IIA  | T2a | M0 | N1 |
| TCGA-73-4670 | 131  | 0 | 69     | FEMALE | Stage IV   | T2  | M1 | N0 |
| TCGA-50-5066 | 1442 | 0 | 72     | MALE   | Stage IB   | T2  | M0 | N0 |
| TCGA-75-5126 |      | 0 | unknow | FEMALE | Stage IIIA | T3  | M0 | N2 |
| TCGA-64-5779 | 864  | 0 | 61     | MALE   | Stage IIIA | T2  | M0 | N2 |
| TCGA-55-6543 | 435  | 0 | 60     | FEMALE | Stage IA   | T1b | MX | N0 |
| TCGA-55-A48Z | 651  | 0 | 60     | FEMALE | Stage IIIB | T1a | MX | N3 |
| TCGA-86-8278 | 944  | 0 | 63     | FEMALE | Stage IIB  | T2  | M0 | N1 |
| TCGA-L4-A4E5 | 578  | 0 | 48     | FEMALE | Stage I    | T1  | M0 | N0 |
| TCGA-49-4505 | 428  | 1 | 61     | FEMALE | Stage IIB  | T2  | M0 | N1 |
| TCGA-69-7980 | 411  | 0 | 70     | FEMALE | Stage I    | T1b | M0 | N0 |
| TCGA-55-7725 | 442  | 0 | 68     | FEMALE | Stage IA   | T1a | MX | N0 |
| TCGA-78-7162 | 3169 | 1 | 75     | MALE   | Stage IA   | T1  | M0 | N0 |
| TCGA-80-5608 | 2832 | 0 | unknow | FEMALE | Stage IA   | T1  | M0 | N0 |
| TCGA-78-7159 | 1974 | 0 | 60     | FEMALE | Stage IA   | T1  | M0 | NX |
| TCGA-MP-A4TI | 429  | 1 | 72     | MALE   | Stage IIA  | T2a | M0 | N1 |
| TCGA-78-7542 | 321  | 1 | 56     | MALE   | Stage IB   | T2  | M0 | N0 |
| TCGA-91-6836 | 417  | 0 | 52     | FEMALE | Stage IB   | T2  | MX | N0 |
| TCGA-78-7537 | 1622 | 1 | 72     | MALE   | Stage IB   | T2  | M0 | N0 |
| TCGA-97-7941 | 484  | 0 | 72     | FEMALE | Stage IA   | T1b | MX | N0 |
| TCGA-MP-A4TJ | 339  | 1 | 62     | FEMALE | Stage IA   | T1  | M0 | N0 |
| TCGA-78-8660 | 321  | 1 | 69     | MALE   | Stage IIB  | T2  | M0 | N1 |
| TCGA-49-AARQ | 6732 | 0 | 41     | FEMALE | Stage I    | T2  | MX | N0 |
| TCGA-05-4415 | 91   | 1 | 57     | MALE   | Stage IIIB | T4  | M0 | N2 |
| TCGA-86-A4JF | 737  | 1 | 56     | MALE   | Stage IIB  | T3  | M0 | N0 |
| TCGA-86-7701 | 947  | 0 | 66     | MALE   | Stage IV   | T2  | M1 | N0 |
| TCGA-44-3918 | 1036 | 0 | 60     | FEMALE | Stage IA   | T1  | M0 | N0 |
| TCGA-50-6597 | 1268 | 1 | 79     | FEMALE | Stage IB   | T2  | M0 | N0 |
| TCGA-NJ-A4YI | 4    | 1 | 87     | FEMALE | Stage IIIA | T2  | M0 | N2 |
| TCGA-86-8280 | 701  | 0 | 54     | FEMALE | Stage IIA  | T2b | M0 | N0 |
| TCGA-44-2666 | 97   | 1 | 43     | MALE   | Stage IB   | T2  | M0 | N0 |
| TCGA-78-7154 | 593  | 1 | 72     | MALE   | Stage IIIA | T3  | M0 | N2 |
| TCGA-55-A491 | 626  | 0 | 81     | FEMALE | Stage IA   | T1b | MX | N0 |
| TCGA-05-4390 | 1126 | 0 | 58     | FEMALE | Stage IB   | T2  | M0 | N0 |
| TCGA-05-4382 | 607  | 0 | 68     | MALE   | Stage IB   | T2  | M0 | N0 |
| TCGA-55-8206 | 888  | 0 | 56     | MALE   | Stage IA   | T1b | M0 | N0 |
| TCGA-55-7576 | 670  | 0 | 54     | MALE   | Stage IB   | T2a | M0 | N0 |
| TCGA-55-8506 | 11   | 0 | 62     | FEMALE | Stage IIB  | T3  | MX | N0 |
| TCGA-50-5930 | 282  | 1 | 47     | MALE   | Stage IIIA | T2  | M0 | N2 |
| TCGA-05-4403 | 578  | 0 | 76     | MALE   | Stage IB   | T2  | M0 | N0 |
| TCGA-55-7911 | 537  | 0 | 70     | FEMALE | Stage IA   | T1a | MX | N0 |
| TCGA-78-7143 | 4961 | 1 | 62     | FEMALE | Stage IB   | T2  | M0 | N0 |

|              |      |   |    |        |            |     |    |    |
|--------------|------|---|----|--------|------------|-----|----|----|
| TCGA-62-A46P | 594  | 1 | 65 | MALE   | Stage IB   | T2  | M0 | N0 |
| TCGA-95-8494 | 84   | 0 | 67 | MALE   | Stage IIA  | T2a | M0 | N1 |
| TCGA-35-5375 | 264  | 0 | 61 | MALE   | Stage IIIA | T2  | M0 | N2 |
| TCGA-78-7163 | 7248 | 0 | 60 | MALE   | Stage IB   | T2  | M0 | N0 |
| TCGA-05-4417 | 455  | 0 | 51 | FEMALE | Stage IB   | T2  | M0 | N0 |
| TCGA-91-6828 | 323  | 0 | 70 | MALE   | Stage IA   | T1a | M0 | N0 |
| TCGA-44-A47A | 466  | 0 | 78 | FEMALE | Stage IB   | T2a | MX | N0 |
| TCGA-L9-A443 | 193  | 1 | 63 | FEMALE | Stage IA   | T1a | MX | N0 |
| TCGA-86-A4D0 | 116  | 1 | 48 | MALE   | Stage IIA  | T2b | M0 | N0 |
| TCGA-44-A479 | 486  | 0 | 73 | FEMALE | Stage IB   | T2  | MX | N0 |
| TCGA-97-A4LX | 614  | 0 | 81 | MALE   | Stage IB   | T2a | M0 | N0 |
| TCGA-49-4486 | 2318 | 1 | 72 | MALE   | Stage IA   | T1  | M0 | N0 |
| TCGA-50-5932 | 1235 | 1 | 75 | MALE   | Stage IIB  | T2  | M0 | N1 |
| TCGA-86-8073 | 740  | 0 | 58 | MALE   | Stage IB   | T2a | M0 | N0 |
| TCGA-NJ-A55O | 13   | 0 | 56 | FEMALE | Stage IIA  | T1b | M0 | N1 |
| TCGA-55-A494 | 481  | 0 | 61 | FEMALE | Stage IB   | T2a | MX | N0 |
| TCGA-69-7765 | 165  | 0 | 56 | MALE   | unknow     | T4  | MX | N0 |
| TCGA-86-8672 | 19   | 1 | 59 | MALE   | Stage IIB  | T3  | M0 | N0 |
| TCGA-49-4488 | 869  | 1 | 74 | FEMALE | Stage IA   | T1  | MX | N0 |
| TCGA-55-7903 | 567  | 0 | 64 | MALE   | Stage IA   | T1b | MX | N0 |
| TCGA-MP-A4T2 | 1136 | 1 | 71 | MALE   | Stage IA   | T1  | M0 | N0 |
| TCGA-49-4487 | 855  | 1 | 72 | FEMALE | Stage IA   | T1  | M0 | N0 |
| TCGA-99-8033 | 656  | 1 | 74 | FEMALE | Stage IV   | TX  | M1 | NX |
| TCGA-50-5068 | 1499 | 1 | 59 | FEMALE | Stage IIB  | T2  | MX | N1 |
| TCGA-55-6978 | 176  | 1 | 81 | MALE   | Stage IIA  | T2b | MX | N0 |
| TCGA-91-A4BC | 44   | 0 | 59 | MALE   | Stage IIA  | T2b | MX | N0 |
| TCGA-49-4490 | 385  | 1 | 45 | FEMALE | Stage IIIA | T3  | M0 | N2 |
| TCGA-86-7955 | 1072 | 0 | 62 | MALE   | Stage IB   | T2a | M0 | N0 |
| TCGA-05-4430 | 761  | 0 | 59 | FEMALE | Stage IB   | T2  | M0 | N0 |
| TCGA-44-3398 | 1163 | 0 | 77 | FEMALE | Stage IA   | T1b | M0 | N0 |
| TCGA-49-4507 | 268  | 1 | 73 | FEMALE | Stage IIIA | T3  | M0 | N1 |
| TCGA-97-A4M5 | 634  | 0 | 83 | MALE   | Stage IA   | T1b | M0 | N0 |
| TCGA-49-6745 | 522  | 0 | 82 | MALE   | Stage IIIA | T2a | M0 | N2 |
| TCGA-86-8674 | 806  | 0 | 50 | MALE   | Stage IIA  | T2a | M0 | N1 |
| TCGA-05-4384 | 426  | 0 | 66 | MALE   | Stage IIIA | T2  | M0 | N2 |
| TCGA-69-7979 | 408  | 0 | 71 | FEMALE | Stage IB   | T2a | MX | N0 |
| TCGA-78-7147 | 586  | 1 | 67 | FEMALE | Stage IIB  | T2  | M0 | N1 |
| TCGA-93-7347 | 683  | 0 | 76 | FEMALE | Stage IA   | T1a | MX | N0 |
| TCGA-49-4514 | 1700 | 0 | 79 | FEMALE | Stage IA   | T1  | M0 | N0 |
| TCGA-49-6742 | 488  | 1 | 70 | MALE   | Stage IIA  | T2a | M0 | N1 |
| TCGA-MN-A4N1 | 827  | 0 | 60 | MALE   | Stage IIA  | T2a | M0 | N1 |
| TCGA-J2-A4AD | 550  | 1 | 61 | FEMALE | Stage IA   | T1a | MX | N0 |
| TCGA-78-7160 | 697  | 1 | 61 | MALE   | Stage IV   | T4  | M1 | N2 |
| TCGA-05-4397 | 731  | 1 | 65 | MALE   | Stage IIB  | T2  | M0 | N1 |
| TCGA-91-8497 | 434  | 1 | 75 | FEMALE | Stage IA   | T1a | MX | N0 |
| TCGA-55-7283 | 609  | 0 | 76 | FEMALE | Stage IIIA | T3  | MX | N2 |
| TCGA-05-4244 | 0    | 0 | 70 | MALE   | Stage IV   | T2  | M1 | N2 |
| TCGA-91-6848 | 224  | 0 | 59 | MALE   | Stage IIIA | T2  | MX | N2 |
| TCGA-MP-A4TD | 307  | 1 | 71 | MALE   | Stage IIIA | T2  | M0 | N2 |

|              |      |   |        |        |            |     |        |    |
|--------------|------|---|--------|--------|------------|-----|--------|----|
| TCGA-55-8620 | 375  | 1 | 60     | MALE   | Stage IV   | T1a | M1b    | N1 |
| TCGA-97-7547 | 1965 | 0 | 67     | FEMALE | Stage IB   | T2  | MX     | N0 |
| TCGA-44-6777 | 987  | 1 | 85     | FEMALE | Stage IB   | T2  | MX     | NX |
| TCGA-38-4629 | 864  | 1 | 68     | MALE   | Stage IIB  | T3  | M0     | N0 |
| TCGA-55-8097 | 476  | 0 | 60     | FEMALE | Stage IA   | T1a | MX     | N0 |
| TCGA-97-8179 | 435  | 0 | 72     | MALE   | Stage IA   | T1a | M0     | N0 |
| TCGA-78-8648 | 1209 | 1 | 58     | FEMALE | Stage IIB  | T3  | M0     | N0 |
| TCGA-75-5125 | 2027 | 1 | unknow | MALE   | Stage IIB  | T2  | M0     | N1 |
| TCGA-95-7944 | 377  | 0 | 71     | MALE   | Stage IA   | T1a | M0     | N0 |
| TCGA-44-6147 | 845  | 0 | 67     | FEMALE | Stage IA   | T1b | M0     | NX |
| TCGA-55-7727 | 119  | 0 | 70     | MALE   | Stage IIIA | T1a | MX     | N2 |
| TCGA-95-7039 | 1272 | 0 | 54     | FEMALE | Stage IIB  | T3  | MX     | N0 |
| TCGA-55-6975 | 118  | 1 | 61     | MALE   | Stage IIB  | T2  | M0     | N1 |
| TCGA-05-4433 | 730  | 0 | 82     | MALE   | Stage IB   | T2  | M0     | N0 |
| TCGA-05-4427 | 791  | 0 | 65     | FEMALE | Stage IIB  | T2  | M0     | N1 |
| TCGA-86-7711 | 1046 | 1 | 70     | MALE   | Stage IIA  | T2a | M0     | N1 |
| TCGA-69-7761 | 186  | 0 | 84     | MALE   | Stage IB   | T2a | MX     | N0 |
| TCGA-44-2661 | 1159 | 0 | 69     | FEMALE | Stage IA   | T1  | M0     | N0 |
| TCGA-55-6981 | 1379 | 1 | 53     | FEMALE | Stage IIIA | T1  | M0     | N2 |
| TCGA-MP-A4TH | 741  | 0 | 70     | FEMALE | Stage IA   | T1a | M0     | N0 |
| TCGA-55-8299 | 469  | 1 | 61     | FEMALE | Stage IA   | T1b | MX     | N0 |
| TCGA-L4-A4E6 | 435  | 0 | 67     | MALE   | Stage IA   | T1  | M0     | N0 |
| TCGA-44-A47F | 337  | 0 | 74     | MALE   | Stage IIB  | T2b | M0     | N1 |
| TCGA-55-7913 | 561  | 1 | 61     | FEMALE | Stage IA   | T1b | MX     | N0 |
| TCGA-38-4628 | 1492 | 1 | 65     | FEMALE | Stage IIB  | T2  | M0     | N1 |
| TCGA-67-6215 | 174  | 0 | 52     | FEMALE | Stage IB   | T2a | M0     | N0 |
| TCGA-NJ-A7XG | 617  | 0 | 49     | MALE   | Stage IIIA | T4  | M0     | N1 |
| TCGA-67-3772 | 573  | 0 | 82     | FEMALE | Stage IB   | T2  | M0     | N0 |
| TCGA-S2-AA1A | 513  | 0 | 68     | FEMALE | Stage IA   | T1b | M0     | N0 |
| TCGA-49-6767 | 677  | 0 | 46     | FEMALE | Stage IIB  | T3  | MX     | N0 |
| TCGA-55-6980 | 2109 | 0 | 56     | MALE   | Stage IA   | T1  | M0     | N0 |
| TCGA-44-6144 | 723  | 0 | 58     | MALE   | Stage IA   | T1a | M0     | N0 |
| TCGA-44-5645 | 852  | 0 | 61     | FEMALE | Stage IA   | T1  | unknow | NX |
| TCGA-MP-A4T7 | 167  | 1 | 75     | FEMALE | Stage IV   | T2  | M1     | N0 |
| TCGA-62-A46V | 2199 | 0 | 78     | FEMALE | Stage IB   | T2  | M0     | N0 |
| TCGA-44-6774 | 658  | 0 | 56     | FEMALE | Stage IIIA | T1  | M0     | N2 |
| TCGA-55-8621 | 515  | 0 | 75     | FEMALE | Stage IA   | T1a | MX     | N0 |
| TCGA-05-4396 | 303  | 1 | 76     | MALE   | Stage IIIB | T4  | M0     | N1 |
| TCGA-55-7573 | 487  | 0 | 72     | FEMALE | Stage IA   | T1b | MX     | N0 |
| TCGA-49-AARR | 4992 | 0 | 68     | MALE   | Stage IA   | T1  | MX     | N0 |
| TCGA-97-A4M3 | 540  | 0 | 69     | FEMALE | Stage IA   | T1b | M0     | N0 |
| TCGA-49-AARO | 3759 | 0 | 39     | FEMALE | Stage IA   | T1a | MX     | N0 |
| TCGA-91-6830 | 60   | 0 | 65     | FEMALE | Stage IIA  | T1  | MX     | N1 |
| TCGA-38-6178 | 448  | 0 | 70     | FEMALE | Stage IIIA | T2b | unknow | N2 |
| TCGA-55-8091 | 600  | 0 | 74     | MALE   | Stage IB   | T2  | MX     | N0 |
| TCGA-55-8507 | 418  | 0 | 53     | MALE   | Stage IA   | T1a | MX     | N0 |
| TCGA-75-7030 |      | 0 | unknow | MALE   | Stage IIB  | T3  | M0     | N0 |
| TCGA-86-A456 | 896  | 0 | 78     | FEMALE | Stage IA   | T1a | M0     | N0 |
| TCGA-55-A492 | 596  | 0 | 70     | FEMALE | Stage IA   | T1a | MX     | N0 |

|              |      |   |        |        |            |     |    |    |
|--------------|------|---|--------|--------|------------|-----|----|----|
| TCGA-64-1678 | 1189 | 0 | 70     | FEMALE | unknow     | T2b | M0 | N0 |
| TCGA-62-8399 | 2696 | 0 | 62     | MALE   | Stage IIIA | T2  | M0 | N2 |
| TCGA-55-6985 | 1233 | 0 | 58     | FEMALE | Stage IB   | T2  | MX | N0 |
| TCGA-44-8120 | 260  | 0 | 58     | MALE   | Stage IB   | T2a | M0 | N0 |
| TCGA-50-5935 | 653  | 1 | 86     | FEMALE | Stage IA   | T1  | M0 | N0 |
| TCGA-50-5044 | 624  | 1 | 72     | FEMALE | Stage IIIB | T4  | M0 | N1 |
| TCGA-55-8085 | 904  | 0 | 64     | MALE   | Stage IA   | T1b | M0 | N0 |
| TCGA-L9-A444 | 307  | 0 | 60     | FEMALE | Stage IA   | T1a | MX | N0 |
| TCGA-55-8615 | 446  | 0 | 67     | MALE   | Stage IIIA | T3  | MX | N2 |
| TCGA-97-A4M0 | 652  | 0 | 60     | FEMALE | Stage IB   | T2a | M0 | N0 |
| TCGA-95-7562 | 87   | 1 | 71     | MALE   | Stage IIA  | T2a | M0 | N1 |
| TCGA-38-4626 | 3674 | 0 | 57     | FEMALE | unknow     | T2b | M0 | N0 |
| TCGA-67-6216 | 141  | 0 | 57     | FEMALE | Stage IA   | T1a | M0 | N0 |
| TCGA-75-6203 |      | 0 | unknow | FEMALE | Stage IIIA | T2  | M0 | N2 |
| TCGA-67-3773 | 427  | 0 | 84     | FEMALE | Stage IB   | T2  | M0 | N0 |
| TCGA-78-7161 | 291  | 1 | 69     | FEMALE | Stage IIB  | T3  | M0 | N0 |
| TCGA-NJ-A4YQ | 1432 | 0 | 69     | FEMALE | Stage IA   | T1b | M0 | N0 |
| TCGA-50-5072 | 250  | 1 | 74     | MALE   | Stage IIIA | T2  | M0 | N2 |
| TCGA-50-5931 | 434  | 1 | 75     | FEMALE | Stage IB   | T2  | M0 | N0 |
| TCGA-49-AARN | 1135 | 1 | 56     | FEMALE | Stage IA   | T1  | MX | N0 |
| TCGA-64-1681 | 1167 | 1 | 61     | FEMALE | Stage IA   | T1  | M0 | N0 |
| TCGA-99-7458 | 747  | 0 | 74     | FEMALE | Stage IIIA | T4  | M0 | N0 |
| TCGA-35-4122 | 225  | 0 | 69     | MALE   | Stage IA   | T1  | M0 | N0 |
| TCGA-55-7728 | 704  | 0 | 64     | FEMALE | Stage IB   | T2a | MX | N0 |
| TCGA-44-7672 | 719  | 0 | 52     | FEMALE | Stage IA   | T1b | M0 | N0 |
| TCGA-44-7662 | 218  | 0 | 61     | MALE   | Stage IB   | T2a | MX | N0 |
| TCGA-86-7714 | 625  | 1 | 61     | FEMALE | Stage IIIA | T1b | M0 | N2 |
| TCGA-97-7552 | 1932 | 0 | 70     | MALE   | Stage IB   | T2  | MX | N0 |
| TCGA-44-5643 | 1013 | 0 | 53     | MALE   | Stage IIIA | T2b | M0 | N2 |
| TCGA-75-7025 | 3305 | 0 | unknow | MALE   | Stage IB   | T2  | M0 | N0 |
| TCGA-78-8655 | 2360 | 0 | 77     | FEMALE | Stage IA   | T1  | M0 | N0 |
| TCGA-97-7937 | 564  | 0 | 65     | MALE   | Stage IB   | T2a | MX | N0 |
| TCGA-64-1679 | 2488 | 0 | 58     | FEMALE | Stage IIIA | T1  | M0 | N2 |
| TCGA-86-A4P8 | 805  | 0 | 59     | FEMALE | Stage IIIA | T1b | MX | N2 |
| TCGA-55-8205 | 599  | 0 | 76     | FEMALE | Stage IIA  | T2b | M0 | N0 |
| TCGA-44-2668 | 761  | 1 | 51     | MALE   | Stage IB   | T2  | M0 | N0 |
| TCGA-NJ-A4YP | 50   | 0 | 52     | MALE   | Stage IB   | T2a | M0 | N0 |
| TCGA-49-4494 | 1081 | 1 | 77     | MALE   | Stage IIIA | T3  | M0 | N2 |
| TCGA-49-AAR9 | 260  | 1 | 61     | MALE   | Stage IIB  | T3  | MX | N0 |
| TCGA-38-4625 | 2973 | 0 | 66     | FEMALE | Stage IB   | T2a | M0 | N0 |
| TCGA-44-7661 | 557  | 1 | 69     | FEMALE | Stage IB   | T2a | M0 | N0 |
| TCGA-55-7726 | 652  | 0 | 72     | FEMALE | Stage IA   | T1b | MX | N0 |
| TCGA-75-6205 |      | 1 | unknow | FEMALE | Stage IB   | T2a | M0 | N0 |
| TCGA-55-6972 | 1632 | 1 | 72     | MALE   | Stage IB   | T2  | M0 | N0 |
| TCGA-86-8359 | 444  | 1 | 52     | MALE   | Stage IIIA | T3  | M0 | N2 |
| TCGA-50-6673 | 22   | 1 | 84     | FEMALE | Stage I    | T1  | M0 | N0 |
| TCGA-44-3917 | 1183 | 0 | 33     | FEMALE | Stage IB   | T2  | M0 | N0 |
| TCGA-95-7567 | 568  | 0 | 61     | MALE   | Stage IIB  | T2b | M0 | N1 |
| TCGA-97-8176 | 468  | 1 | 63     | MALE   | Stage IIIA | T3  | M0 | N1 |

|              |      |   |        |        |            |     |        |        |
|--------------|------|---|--------|--------|------------|-----|--------|--------|
| TCGA-64-1677 | 628  | 1 | 77     | FEMALE | Stage IIIA | T2  | M0     | N2     |
| TCGA-50-5942 | 1847 | 0 | 67     | FEMALE | Stage IA   | T1  | M0     | N0     |
| TCGA-38-4627 | 1147 | 1 | 64     | FEMALE | Stage IIA  | T1b | M0     | N1     |
| TCGA-86-8055 | 124  | 1 | 79     | MALE   | Stage IIA  | T2a | M0     | N1     |
| TCGA-55-A4DF | 440  | 1 | 88     | MALE   | Stage IA   | T1b | MX     | N0     |
| TCGA-44-2664 | 1251 | 0 | 66     | FEMALE | Stage IA   | T1  | M0     | N0     |
| TCGA-44-A47B | 287  | 0 | 79     | MALE   | Stage IB   | T2a | M0     | N0     |
| TCGA-62-A46R | 1725 | 1 | 54     | FEMALE | Stage IB   | T2  | M0     | N0     |
| TCGA-71-8520 | 210  | 1 | 60     | FEMALE | Stage IB   | T2  | M0     | N0     |
| TCGA-80-5611 | 2595 | 0 | unknow | MALE   | Stage IB   | T2  | M0     | N0     |
| TCGA-05-4250 | 121  | 1 | 79     | FEMALE | Stage IIIA | T3  | M0     | N1     |
| TCGA-78-7158 | 179  | 1 | 59     | FEMALE | Stage IIIB | T4  | M0     | N2     |
| TCGA-53-7813 | 424  | 0 | 51     | FEMALE | Stage IIIB | T4  | M0     | N0     |
| TCGA-55-6970 | 464  | 1 | 67     | FEMALE | Stage IIIA | T2  | MX     | N2     |
| TCGA-73-A9RS | 340  | 1 | 41     | MALE   | Stage IIB  | T3  | M0     | N0     |
| TCGA-69-7764 | 414  | 0 | 75     | MALE   | Stage IA   | T1b | M0     | N0     |
| TCGA-55-8094 | 541  | 0 | 51     | MALE   | Stage IV   | T2b | M1b    | N0     |
| TCGA-95-A4VN | 553  | 0 | 62     | FEMALE | Stage IIA  | T2a | M0     | N1     |
| TCGA-69-8254 | 409  | 0 | 85     | MALE   | unknow     | T2b | unknow | unknow |
| TCGA-49-AAR3 | 1893 | 0 | 69     | MALE   | Stage IIB  | T2  | MX     | N1     |
| TCGA-49-4510 | 896  | 1 | 51     | FEMALE | Stage IIB  | T2  | M0     | N1     |
| TCGA-55-7281 | 872  | 0 | 70     | FEMALE | Stage IA   | T1b | M0     | N0     |
| TCGA-69-7763 | 690  | 0 | 69     | MALE   | Stage IA   | T1b | M0     | N0     |
| TCGA-78-7148 | 626  | 1 | 71     | MALE   | Stage IIB  | T2  | M0     | N1     |
| TCGA-97-A4M7 | 629  | 0 | 74     | MALE   | Stage IA   | T1b | M0     | N0     |
| TCGA-86-8668 | 423  | 0 | 61     | FEMALE | Stage IA   | T1b | M0     | N0     |
| TCGA-49-AAQV | 677  | 1 | 63     | FEMALE | Stage II   | T1  | MX     | N1     |
| TCGA-71-6725 | 256  | 0 | 48     | FEMALE | Stage IB   | T2  | M0     | N0     |
| TCGA-55-7570 | 824  | 0 | 60     | MALE   | Stage IA   | T1a | MX     | N0     |
| TCGA-05-4402 | 244  | 1 | 57     | FEMALE | Stage IV   | T2  | M1     | NX     |
| TCGA-67-4679 | 448  | 0 | 69     | MALE   | unknow     | T3  | M0     | N0     |
| TCGA-05-4422 | 365  | 0 | 68     | MALE   | Stage IB   | T2  | M0     | N0     |
| TCGA-55-7227 | 952  | 1 | 77     | MALE   | Stage IIIA | T3  | MX     | N1     |
| TCGA-55-1594 | 1178 | 0 | 68     | MALE   | Stage IIIA | T2  | M0     | N2     |
| TCGA-49-AAR4 | 879  | 1 | 51     | MALE   | Stage IIIA | T2  | MX     | N2     |
| TCGA-62-A46Y | 414  | 1 | 70     | FEMALE | Stage IIIA | T2  | M0     | N2     |
| TCGA-86-8054 | 1148 | 0 | 61     | MALE   | Stage IIB  | T2b | M0     | N1     |
| TCGA-62-A46S | 1653 | 1 | 73     | MALE   | Stage IB   | T2  | M0     | N0     |
| TCGA-97-8177 | 499  | 0 | 59     | FEMALE | Stage IB   | T2a | M0     | N0     |
| TCGA-05-5425 | 882  | 0 | 68     | MALE   | Stage IIB  | T2b | M0     | N1     |
| TCGA-49-6744 | 1683 | 0 | 64     | FEMALE | Stage IIA  | T2a | MX     | N1     |
| TCGA-44-6778 | 1864 | 0 | 59     | MALE   | Stage IA   | T1  | MX     | N0     |
| TCGA-75-6206 | 2590 | 0 | unknow | MALE   | Stage IB   | T2  | M0     | N0     |
| TCGA-80-5607 |      | 0 | unknow | FEMALE | Stage IIB  | T2  | M0     | N1     |
| TCGA-NJ-A4YF | 2161 | 0 | 50     | FEMALE | Stage IA   | T1  | M0     | N0     |
| TCGA-78-7220 | 807  | 1 | 53     | FEMALE | Stage IIIA | T2  | M0     | N2     |
| TCGA-50-6595 | 189  | 1 | 74     | FEMALE | Stage IIIA | T2  | M0     | N2     |
| TCGA-78-7167 | 2681 | 1 | 77     | MALE   | Stage IV   | T2  | M1     | N0     |
| TCGA-95-7948 | 476  | 0 | 42     | FEMALE | Stage IB   | T2a | M0     | N0     |

|              |      |   |        |        |            |     |     |    |
|--------------|------|---|--------|--------|------------|-----|-----|----|
| TCGA-75-6207 |      | 1 | unknow | MALE   | Stage IIIA | T2  | M0  | N2 |
| TCGA-05-4389 | 1369 | 0 | 70     | MALE   | Stage IA   | T1  | M0  | N0 |
| TCGA-05-5429 | 275  | 1 | 60     | MALE   | Stage IIIA | T3  | M0  | N2 |
| TCGA-55-7907 | 343  | 1 | 77     | MALE   | Stage IIA  | T2a | MX  | N1 |
| TCGA-67-3776 | 61   | 0 | 57     | FEMALE | Stage IIB  | T2  | M0  | N1 |
| TCGA-73-4677 | 38   | 1 | 74     | MALE   | unknow     | T2a | M0  | N0 |
| TCGA-97-8172 | 545  | 0 | 75     | FEMALE | Stage IB   | T2a | M0  | N0 |
| TCGA-75-5147 | 1333 | 0 | unknow | FEMALE | Stage IB   | T2  | M0  | N0 |
| TCGA-50-5045 | 2174 | 1 | 57     | FEMALE | unknow     | T2  | M0  | N1 |
| TCGA-44-A4SU | 409  | 1 | 67     | FEMALE | Stage IA   | T1a | MX  | N0 |
| TCGA-55-8301 | 534  | 0 | 58     | MALE   | Stage IB   | T2a | MX  | N0 |
| TCGA-55-1596 | 2065 | 0 | 55     | MALE   | Stage IIB  | T2  | M0  | N1 |
| TCGA-55-A4DG | 608  | 0 | 71     | MALE   | Stage IA   | T1b | MX  | N0 |
| TCGA-49-AARE | 1229 | 1 | 51     | FEMALE | Stage IA   | T1  | MX  | N0 |
| TCGA-50-6592 | 777  | 1 | 71     | FEMALE | Stage IB   | T2  | M0  | N0 |
| TCGA-J2-A4AG | 988  | 0 | 66     | FEMALE | Stage IA   | T1b | MX  | N0 |
| TCGA-67-3771 | 610  | 0 | 77     | FEMALE | Stage IA   | T1  | M0  | N0 |
| TCGA-73-4662 | 2515 | 0 | 65     | FEMALE | Stage IA   | T1  | M0  | N0 |
| TCGA-05-5420 | 457  | 0 | 67     | MALE   | Stage IIIA | T2  | M0  | N2 |
| TCGA-86-8056 | 139  | 0 | 63     | FEMALE | Stage IIIA | T4  | M0  | N0 |
| TCGA-J2-A4AE | 1079 | 0 | 77     | FEMALE | Stage IA   | T1a | MX  | N0 |
| TCGA-44-7669 | 574  | 1 | 59     | MALE   | Stage IIA  | T1b | MX  | N1 |
| TCGA-44-8119 | 285  | 0 | 73     | MALE   | Stage IIB  | T3  | M0  | N0 |
| TCGA-50-5941 | 1474 | 0 | 55     | FEMALE | Stage IIIA | T2a | M0  | N2 |
| TCGA-64-5781 | 1559 | 0 | 55     | FEMALE | Stage IB   | T2  | M0  | N0 |
| TCGA-73-4666 | 800  | 0 | 52     | FEMALE | Stage IV   | T1  | M1  | N0 |
| TCGA-L9-A8F4 | 476  | 0 | 64     | FEMALE | Stage IB   | T2a | MX  | N0 |
| TCGA-69-8253 | 426  | 0 | 59     | FEMALE | Stage IIA  | T1a | MX  | N1 |
| TCGA-97-8552 | 626  | 0 | 55     | FEMALE | Stage I    | T1a | MX  | N0 |
| TCGA-44-6776 | 2616 | 0 | 60     | FEMALE | Stage IA   | T1  | MX  | N0 |
| TCGA-L9-A5IP | 58   | 1 | 40     | FEMALE | Stage IV   | T3  | M1b | N2 |
| TCGA-44-6148 | 704  | 0 | 60     | MALE   | Stage IA   | T1b | M0  | N0 |
| TCGA-38-4630 | 1073 | 1 | 75     | FEMALE | Stage IB   | T2  | M0  | N0 |
| TCGA-95-7947 | 477  | 0 | 67     | MALE   | Stage IA   | T1a | M0  | N0 |
| TCGA-4B-A93V | 300  | 1 | 52     | FEMALE | Stage IA   | T1b | M0  | N0 |
| TCGA-86-8076 | 993  | 0 | 42     | MALE   | Stage IA   | T1  | M0  | N0 |
| TCGA-05-4410 | 0    | 0 | 62     | MALE   | Stage IB   | T2  | M0  | N0 |
| TCGA-62-A472 | 910  | 0 | 70     | MALE   | Stage IIB  | T3  | M0  | N0 |
| TCGA-55-6968 | 1293 | 1 | 61     | MALE   | Stage IV   | T1  | M1  | N0 |
| TCGA-55-8514 | 520  | 0 | 70     | FEMALE | Stage IB   | T2a | MX  | N0 |
| TCGA-75-7031 |      | 0 | unknow | FEMALE | Stage IB   | T2  | M0  | N0 |
| TCGA-62-8397 | 1289 | 0 | 70     | FEMALE | Stage IIB  | T3  | M0  | N0 |
| TCGA-86-7953 | 997  | 0 | 69     | FEMALE | Stage IA   | T1b | M0  | N0 |
| TCGA-75-5146 | 2368 | 0 | unknow | MALE   | Stage IB   | T2  | M0  | N0 |
| TCGA-44-A47G | 351  | 0 | 73     | FEMALE | Stage IA   | T1  | M0  | N0 |
| TCGA-86-8671 | 839  | 0 | 72     | FEMALE | Stage IIB  | T2b | M0  | N1 |
| TCGA-86-8358 | 653  | 0 | 44     | MALE   | Stage IB   | T2a | M0  | N0 |
| TCGA-93-A4JN | 718  | 0 | 71     | MALE   | Stage IV   | T2a | M1a | N0 |
| TCGA-05-4432 | 761  | 0 | 66     | MALE   | Stage IIB  | T2  | M0  | N1 |

|              |      |   |        |        |            |     |     |    |
|--------------|------|---|--------|--------|------------|-----|-----|----|
| TCGA-86-8669 | 938  | 0 | 64     | MALE   | Stage IA   | T1b | M0  | N0 |
| TCGA-95-A4VK | 651  | 0 | 74     | FEMALE | Stage IIIA | T2b | M0  | N2 |
| TCGA-44-7670 | 882  | 0 | 47     | FEMALE | Stage IIA  | T1b | M0  | N1 |
| TCGA-73-7499 | 1531 | 1 | 81     | FEMALE | Stage IB   | T2a | M0  | N0 |
| TCGA-62-A46U | 2067 | 0 | 71     | FEMALE | Stage IIB  | T2  | M0  | N1 |
| TCGA-55-8508 | 617  | 0 | 60     | FEMALE | Stage IIA  | T2a | MX  | N1 |
| TCGA-44-2657 | 1351 | 0 | 74     | FEMALE | Stage IB   | T2  | M0  | NX |
| TCGA-97-8171 | 568  | 0 | 81     | MALE   | Stage IV   | T2a | M1a | N2 |
| TCGA-50-5944 | 1750 | 0 | 69     | FEMALE | Stage IA   | T1  | M0  | N0 |
| TCGA-78-7633 | 1528 | 1 | 67     | MALE   | Stage IB   | T2  | M0  | N0 |
| TCGA-64-5775 | 62   | 1 | 71     | MALE   | Stage IIIA | T4  | M0  | N0 |
| TCGA-J2-8194 | 724  | 0 | 69     | FEMALE | Stage IIB  | T3  | MX  | N0 |
| TCGA-78-7539 | 791  | 0 | 75     | FEMALE | Stage IIA  | T2b | M0  | N0 |
| TCGA-91-6829 | 1258 | 1 | 78     | MALE   | Stage IB   | T2  | MX  | N0 |
| TCGA-99-8028 | 1118 | 0 | 50     | FEMALE | Stage IA   | T1a | M0  | N0 |
| TCGA-78-7153 | 3635 | 0 | 65     | FEMALE | Stage IB   | T2  | M0  | N0 |
| TCGA-L9-A50W | 442  | 1 | 75     | MALE   | Stage IIA  | T1b | MX  | N1 |
| TCGA-50-6594 | 370  | 1 | 79     | FEMALE | Stage IIIA | T3  | M0  | N2 |
| TCGA-50-5936 | 257  | 1 | 58     | MALE   | Stage IIIA | T2  | M0  | N2 |
| TCGA-05-5428 | 670  | 0 | 57     | MALE   | Stage IIA  | T1b | M0  | N1 |
| TCGA-55-5899 | 930  | 0 | 58     | MALE   | unknow     | T1a | M0  | N1 |
| TCGA-44-7659 | 691  | 0 | 70     | MALE   | Stage IA   | T1b | MX  | N0 |
| TCGA-55-7816 | 468  | 1 | 49     | FEMALE | Stage IV   | TX  | MX  | NX |
| TCGA-05-4425 | 669  | 0 | 70     | FEMALE | Stage IV   | T2  | M1  | N0 |
| TCGA-44-2665 | 1301 | 0 | 55     | FEMALE | Stage IIB  | T2  | M0  | N1 |
| TCGA-05-4424 | 913  | 0 | 70     | MALE   | Stage IIB  | T3  | M0  | N0 |
| TCGA-78-7156 | 976  | 1 | 62     | MALE   | Stage IV   | T4  | M1  | N1 |
| TCGA-49-4512 | 905  | 1 | 69     | FEMALE | Stage IIIA | T2  | MX  | N2 |
| TCGA-78-7536 | 244  | 1 | 69     | MALE   | Stage IIIA | T2  | M0  | N2 |
| TCGA-97-8175 | 551  | 0 | 55     | FEMALE | Stage IB   | T2a | M0  | N0 |
| TCGA-49-4501 | 1421 | 1 | 67     | FEMALE | Stage IB   | T2  | M0  | N0 |
| TCGA-53-7626 | 929  | 1 | 76     | FEMALE | Stage IIA  | T1  | M0  | N1 |
| TCGA-55-6984 | 760  | 1 | 71     | FEMALE | Stage IIB  | T2  | M0  | N1 |
| TCGA-44-2659 | 1367 | 0 | 65     | FEMALE | Stage IIB  | T1  | M0  | N1 |
| TCGA-MP-A4SW | 1778 | 1 | 53     | MALE   | Stage IIB  | T2  | M0  | N1 |
| TCGA-55-A48X | 689  | 0 | 63     | FEMALE | Stage IIA  | T1b | M0  | N1 |
| TCGA-55-1592 | 701  | 1 | 65     | MALE   | Stage IA   | T2  | M0  | N0 |
| TCGA-86-8673 | 862  | 0 | 61     | MALE   | Stage IB   | T2  | M0  | N0 |
| TCGA-35-4123 | 182  | 0 | 38     | MALE   | Stage IA   | T1  | M0  | N0 |
| TCGA-78-8640 | 7062 | 0 | 59     | MALE   | Stage IIA  | T1  | M0  | N1 |
| TCGA-75-7027 | 3059 | 0 | unknow | MALE   | Stage IB   | T2  | M0  | N0 |
| TCGA-99-8032 | 44   | 0 | 61     | MALE   | Stage IA   | T1a | M0  | N0 |
| TCGA-49-6761 | 354  | 0 | 68     | FEMALE | Stage IIIA | T1  | MX  | N2 |
| TCGA-MP-A4SY | 1501 | 1 | 61     | MALE   | Stage IIB  | T2  | M0  | N1 |
| TCGA-55-A490 | 99   | 1 | 78     | MALE   | Stage IIA  | T2b | MX  | N0 |
| TCGA-93-7348 | 531  | 0 | 75     | FEMALE | Stage IA   | T1a | MX  | N0 |
| TCGA-49-AAR0 | 4765 | 0 | 57     | MALE   | Stage IA   | T1  | MX  | N0 |
| TCGA-93-A4JP | 578  | 0 | 64     | MALE   | Stage IV   | TX  | M1b | NX |
| TCGA-55-6979 | 237  | 1 | 59     | FEMALE | Stage IIB  | T2  | M0  | N1 |

|              |      |   |    |        |            |     |     |    |
|--------------|------|---|----|--------|------------|-----|-----|----|
| TCGA-73-7498 | 1189 | 0 | 58 | FEMALE | Stage IA   | T1b | M0  | N0 |
| TCGA-MP-A4T8 | 161  | 1 | 68 | MALE   | Stage IIIA | T2  | M0  | N2 |
| TCGA-50-6590 | 1288 | 1 | 72 | FEMALE | Stage IB   | T2  | M0  | N0 |
| TCGA-64-5815 | 866  | 0 | 74 | MALE   | Stage IIB  | T2  | M0  | N1 |
| TCGA-78-7540 | 1197 | 1 | 66 | FEMALE | Stage IB   | T2  | M0  | N0 |
| TCGA-55-8510 | 539  | 0 | 55 | FEMALE | Stage IB   | T2a | MX  | N0 |
| TCGA-44-7671 | 889  | 0 | 64 | MALE   | Stage IB   | T2a | M0  | N0 |
| TCGA-91-8496 | 505  | 0 | 63 | FEMALE | Stage IB   | T2a | MX  | NX |
| TCGA-55-8089 | 702  | 1 | 56 | MALE   | Stage IA   | T1a | M0  | N0 |
| TCGA-99-AA5R | 658  | 0 | 70 | FEMALE | Stage IA   | T1a | M0  | N0 |
| TCGA-55-8505 | 440  | 0 | 62 | MALE   | Stage IIIA | T1a | MX  | N2 |
| TCGA-05-5423 | 151  | 0 | 65 | MALE   | Stage IIB  | T2  | M0  | N1 |
| TCGA-55-8614 | 536  | 0 | 76 | MALE   | Stage IB   | T2a | MX  | N0 |
| TCGA-50-5946 | 1617 | 0 | 62 | MALE   | Stage IA   | T1  | MX  | N0 |
| TCGA-05-4245 | 730  | 0 | 81 | MALE   | Stage IIIA | T2  | M0  | N2 |
| TCGA-91-A4BD | 603  | 0 | 78 | MALE   | Stage IIA  | T1b | MX  | N1 |
| TCGA-55-8512 | 607  | 1 | 41 | MALE   | Stage IV   | T1a | M1b | N1 |
| TCGA-NJ-A55A | 15   | 0 | 76 | FEMALE | Stage IB   | T2  | M0  | N0 |
| TCGA-05-4434 | 457  | 1 | 67 | FEMALE | Stage IV   | T4  | M1  | N1 |
| TCGA-97-A4M6 | 568  | 0 | 45 | FEMALE | Stage IA   | T1a | M0  | N0 |
| TCGA-86-7954 | 605  | 0 | 68 | FEMALE | Stage IB   | T2  | M0  | N0 |
| TCGA-78-7150 | 666  | 1 | 59 | MALE   | Stage IIB  | T2  | M0  | N1 |
| TCGA-62-A470 | 1194 | 1 | 84 | MALE   | Stage IB   | T2  | M0  | N0 |
| TCGA-69-8255 | 129  | 0 | 71 | MALE   | Stage IA   | T1a | M0  | N0 |
| TCGA-55-8208 | 674  | 0 | 73 | FEMALE | Stage IA   | T1b | M0  | N0 |
| TCGA-50-5051 | 478  | 1 | 42 | FEMALE | Stage IIIA | T2  | M0  | N2 |
| TCGA-55-7910 | 1040 | 0 | 50 | FEMALE | Stage IIA  | T2b | M0  | N0 |
| TCGA-38-7271 | 800  | 1 | 72 | FEMALE | Stage IA   | T1  | M0  | N0 |
| TCGA-86-8585 | 353  | 0 | 57 | MALE   | Stage IB   | T2a | M0  | N0 |
| TCGA-86-8075 | 694  | 1 | 66 | FEMALE | Stage IB   | T2  | M0  | N0 |
| TCGA-73-4676 | 281  | 1 | 45 | MALE   | Stage IIA  | T2a | M0  | N1 |
| TCGA-50-5933 | 2393 | 1 | 72 | MALE   | Stage IIIB | T4  | M0  | N2 |
| TCGA-73-4675 | 922  | 1 | 59 | MALE   | Stage IIIA | T3  | M0  | N1 |
| TCGA-55-6987 | 2137 | 0 | 77 | MALE   | Stage IA   | T1  | M0  | N0 |
| TCGA-50-5055 | 1830 | 1 | 79 | FEMALE | Stage IIA  | T1  | M0  | N1 |
| TCGA-MN-A4N5 | 84   | 0 | 63 | MALE   | Stage IA   | T1a | M0  | N0 |
| TCGA-38-A44F | 133  | 0 | 80 | MALE   | Stage IB   | T2a | M0  | N0 |
| TCGA-55-6971 | 1400 | 0 | 59 | FEMALE | Stage IB   | T2  | MX  | N0 |
| TCGA-69-7974 | 184  | 0 | 54 | FEMALE | Stage IIIA | T2a | MX  | N2 |
| TCGA-44-6779 | 500  | 1 | 50 | FEMALE | Stage IIB  | T2  | MX  | N1 |
| TCGA-MP-A4TC | 74   | 1 | 77 | MALE   | Stage IIIA | T1  | M0  | N2 |
| TCGA-55-8302 | 478  | 0 | 54 | MALE   | Stage IB   | T2  | MX  | N0 |
| TCGA-67-3774 | 385  | 0 | 73 | FEMALE | Stage IB   | T2  | M0  | N0 |
| TCGA-55-A493 | 28   | 0 | 54 | FEMALE | Stage IB   | T2a | M0  | N0 |
| TCGA-50-7109 | 308  | 1 | 60 | MALE   | Stage IA   | T1  | M0  | N0 |
| TCGA-55-6982 | 995  | 1 | 79 | FEMALE | Stage IIB  | T2  | M0  | N1 |
| TCGA-86-8074 | 24   | 0 | 62 | FEMALE | Stage IIA  | T1b | M0  | N1 |
| TCGA-69-A59K | 591  | 0 | 60 | FEMALE | Stage IIB  | T3  | M0  | N0 |
| TCGA-55-8090 | 598  | 1 | 80 | MALE   | Stage IA   | T1a | M0  | N0 |



|              |      |   |        |        |            |     |    |    |
|--------------|------|---|--------|--------|------------|-----|----|----|
| TCGA-97-A4M2 | 624  | 0 | 66     | MALE   | Stage IA   | T1a | M0 | N0 |
| TCGA-MP-A4T9 | 1265 | 1 | 54     | FEMALE | Stage IIIA | T2  | MX | N2 |
| TCGA-MP-A4TK | 582  | 1 | 56     | FEMALE | Stage IIB  | T2  | MX | N1 |
| TCGA-91-6849 | 35   | 0 | 75     | FEMALE | Stage IIIA | T2  | MX | N2 |
| TCGA-50-6593 | 336  | 1 | 49     | FEMALE | Stage IIIA | T1  | M0 | N2 |
| TCGA-95-7043 | 503  | 1 | 63     | FEMALE | Stage IA   | T1a | MX | N0 |
| TCGA-55-7724 | 705  | 0 | 76     | FEMALE | Stage IB   | T2a | MX | N0 |
| TCGA-53-A4EZ | 1071 | 0 | 63     | MALE   | Stage IIA  | T2a | MX | N1 |
| TCGA-44-7667 | 1097 | 0 | 49     | FEMALE | Stage IIB  | T3  | MX | N0 |
| TCGA-44-8117 | 385  | 0 | 54     | FEMALE | Stage IB   | T2a | M0 | N0 |
| TCGA-55-6983 | 2823 | 0 | 81     | MALE   | Stage IIB  | T2  | M0 | N1 |
| TCGA-44-6146 | 728  | 0 | 64     | MALE   | Stage IIB  | T3  | M0 | N0 |
| TCGA-55-8513 | 791  | 0 | 77     | FEMALE | Stage IIB  | T3  | MX | N0 |
| TCGA-MP-A5C7 | 2248 | 0 | 76     | FEMALE | Stage IB   | T2  | M0 | N0 |
| TCGA-75-6214 | 1115 | 1 | unknow | FEMALE | Stage IIIA | T2  | M0 | N2 |
| TCGA-86-7713 | 1157 | 0 | 70     | MALE   | Stage IIA  | T2b | M0 | N0 |
| TCGA-75-6212 | 1516 | 1 | unknow | FEMALE | Stage IIB  | T2  | M0 | N1 |
| TCGA-62-8394 | 139  | 1 | 65     | FEMALE | Stage IIIB | T4  | M0 | N2 |
| TCGA-64-5778 | 1305 | 0 | 60     | MALE   | Stage IB   | T2  | M0 | N0 |
| TCGA-97-8174 | 164  | 1 | 67     | MALE   | Stage IIA  | T2b | M0 | N0 |
| TCGA-50-8459 | 1119 | 0 | 68     | MALE   | Stage IIB  | T3  | M0 | N0 |
| TCGA-50-8457 | 1125 | 0 | 63     | FEMALE | Stage IA   | T1a | M0 | N0 |
| TCGA-97-A4M1 | 601  | 0 | 52     | FEMALE | Stage IA   | T1a | M0 | N0 |
| TCGA-78-7166 | 258  | 1 | 84     | MALE   | Stage IIB  | T2  | M0 | N1 |
| TCGA-83-5908 | 824  | 0 | 59     | FEMALE | Stage IA   | T1  | M0 | N0 |
| TCGA-05-4426 | 791  | 0 | 71     | MALE   | Stage IB   | T2  | M0 | N0 |
| TCGA-55-7995 | 889  | 0 | 73     | FEMALE | Stage IA   | T1b | M0 | N0 |
| TCGA-93-8067 | 186  | 0 | 77     | MALE   | Stage IB   | T2a | MX | N0 |
| TCGA-55-7284 | 243  | 1 | 74     | MALE   | Stage IIB  | T3  | MX | N0 |
| TCGA-55-1595 | 1479 | 0 | 74     | FEMALE | Stage IA   | T1  | M0 | N0 |
| TCGA-44-2655 | 1324 | 0 | 65     | FEMALE | Stage IA   | T1  | M0 | N0 |
| TCGA-69-8453 | 813  | 0 | 77     | MALE   | Stage IIB  | T3  | MX | N0 |
| TCGA-91-6835 | 79   | 0 | 81     | FEMALE | Stage IA   | T1  | M0 | N0 |
| TCGA-95-8039 | 830  | 0 | 72     | MALE   | Stage IA   | T1  | MX | N0 |
| TCGA-97-7938 | 18   | 1 | 76     | FEMALE | Stage IA   | T1a | MX | N0 |
| TCGA-69-7978 | 134  | 0 | 59     | MALE   | Stage IIB  | T2b | MX | N1 |
| TCGA-55-7994 | 603  | 0 | 81     | MALE   | Stage IIB  | T3  | MX | N0 |
| TCGA-55-8619 | 416  | 0 | 72     | FEMALE | Stage IIB  | T3  | MX | N0 |
| TCGA-78-7149 | 3940 | 0 | 71     | MALE   | Stage IIIB | T4  | M0 | N0 |
| TCGA-38-4631 | 354  | 1 | 72     | FEMALE | Stage IB   | T2  | M0 | N0 |
| TCGA-44-2662 | 1280 | 0 | 65     | MALE   | Stage IB   | T2  | M0 | N0 |
| TCGA-MP-A4SV | 2620 | 1 | 67     | MALE   | Stage IB   | T2  | M0 | N0 |
| TCGA-L9-A7SV | 565  | 0 | 69     | MALE   | Stage IIA  | T2a | M0 | N1 |
| TCGA-93-A4JQ | 526  | 0 | 49     | MALE   | Stage IA   | T1b | MX | N0 |
| TCGA-35-3615 | 14   | 0 | 57     | MALE   | Stage IB   | T2  | M0 | N0 |
| TCGA-05-4418 | 274  | 1 | 69     | MALE   | Stage IIIA | T3  | M0 | N2 |
| TCGA-05-4249 | 1523 | 0 | 67     | MALE   | Stage IB   | T2  | M0 | N0 |
| TCGA-MN-A4N4 | 1175 | 0 | 57     | MALE   | Stage IA   | T1b | M0 | N0 |
| TCGA-73-4658 | 1600 | 1 | 80     | FEMALE | Stage IB   | T2  | M0 | N0 |

|              |      |   |        |        |            |     |    |    |
|--------------|------|---|--------|--------|------------|-----|----|----|
| TCGA-44-A4SS | 415  | 0 | 73     | MALE   | Stage IA   | T1b | M0 | N0 |
| TCGA-95-A4VP | 605  | 0 | 66     | FEMALE | Stage IIIA | T2b | M0 | N2 |
| TCGA-55-7914 | 187  | 1 | 71     | FEMALE | Stage IIA  | T1b | MX | N1 |
| TCGA-78-7145 | 826  | 1 | 52     | FEMALE | Stage IV   | T4  | M1 | N1 |
| TCGA-55-8092 | 154  | 1 | 75     | MALE   | Stage IIB  | T3  | MX | N0 |
| TCGA-MP-A4TE | 896  | 1 | 56     | MALE   | Stage IIA  | T2b | MX | N0 |
| TCGA-MP-A4T4 | 2617 | 1 | 68     | FEMALE | Stage IIB  | T2  | M0 | N1 |
| TCGA-55-8203 | 547  | 0 | 69     | FEMALE | Stage IA   | T1b | M0 | N0 |
| TCGA-55-6712 | 171  | 1 | 71     | MALE   | Stage IIA  | T2a | MX | N1 |
| TCGA-49-6743 | 1621 | 0 | 81     | FEMALE | Stage IIIA | T1  | MX | N2 |
| TCGA-73-4668 | 467  | 0 | 66     | FEMALE | Stage IIB  | T2  | M0 | N1 |
| TCGA-67-3770 | 610  | 0 | 70     | FEMALE | Stage IA   | T1  | M0 | N0 |
| TCGA-64-1680 | 1126 | 0 | 63     | MALE   | Stage IV   | T2a | M1 | N2 |
| TCGA-05-4398 | 1431 | 0 | 47     | FEMALE | Stage IIIB | T4  | M0 | N3 |
| TCGA-78-7155 | 1171 | 1 | 68     | MALE   | Stage IB   | T2  | M0 | N0 |
| TCGA-78-7152 | 1215 | 1 | 65     | MALE   | Stage IB   | T2  | M0 | N0 |
| TCGA-75-6211 |      | 1 | unknow | FEMALE | Stage IB   | T2  | M0 | N0 |
| TCGA-MP-A4T6 | 1790 | 1 | 76     | FEMALE | Stage IIIA | T1  | MX | N2 |
| TCGA-55-A57B | 546  | 0 | 80     | FEMALE | Stage IA   | T1b | M0 | N0 |
| TCGA-44-2656 | 1429 | 0 | 59     | MALE   | Stage IB   | T2  | M0 | N0 |
| TCGA-93-A4JO | 33   | 1 | 70     | MALE   | Stage IA   | T1a | MX | N0 |
| TCGA-78-7535 | 949  | 1 | 45     | MALE   | Stage IB   | T2  | M0 | N0 |
| TCGA-62-8398 | 444  | 1 | 55     | MALE   | Stage IIIA | T2  | M0 | N2 |
| TCGA-91-6840 | 372  | 0 | 59     | FEMALE | Stage IA   | T1b | M0 | N0 |
| TCGA-75-5122 |      | 1 | unknow | MALE   | Stage IB   | T2  | M0 | N0 |
| TCGA-99-8025 | 1060 | 0 | 72     | FEMALE | Stage IIIA | T3  | M0 | N2 |
| TCGA-55-8207 | 977  | 0 | 73     | MALE   | Stage IB   | T2a | MX | N0 |
| TCGA-55-6969 | 1239 | 0 | 52     | MALE   | Stage IB   | T2  | M0 | N0 |
| TCGA-64-5774 | 2676 | 0 | 60     | MALE   | Stage IB   | T2  | M0 | N0 |
| TCGA-O1-A52J | 1798 | 1 | 74     | FEMALE | Stage IA   | T1  | MX | N0 |
| TCGA-86-6851 | 179  | 0 | 73     | FEMALE | Stage IIA  | T1b | M0 | N1 |
| TCGA-62-8395 | 1216 | 0 | 80     | FEMALE | Stage IIB  | T3  | M0 | N0 |
| TCGA-86-A4P7 | 415  | 0 | 63     | FEMALE | Stage IB   | T2a | M0 | N0 |
| TCGA-91-6831 | 310  | 0 | 66     | MALE   | Stage IB   | T2  | MX | N0 |
| TCGA-05-4420 | 912  | 0 | 41     | MALE   | Stage IB   | T2  | M0 | N0 |
| TCGA-05-4395 | 0    | 1 | 76     | MALE   | Stage IIIB | T4  | M0 | N2 |
| TCGA-67-6217 | 422  | 0 | 73     | FEMALE | Stage IIA  | T2a | M0 | N1 |
| TCGA-44-4112 | 808  | 1 | 60     | FEMALE | Stage IB   | T2a | M0 | N0 |
| TCGA-49-AAR2 | 2224 | 0 | 64     | MALE   | Stage IB   | T2  | MX | N0 |
| TCGA-62-A46O | 1454 | 1 | 65     | FEMALE | Stage IB   | T2  | M0 | N0 |
| TCGA-44-7660 | 592  | 0 | 72     | MALE   | Stage IB   | T2  | MX | N0 |
| TCGA-44-3919 | 1026 | 1 | 71     | FEMALE | Stage IA   | T1  | M0 | N0 |
| TCGA-44-6775 | 705  | 0 | 72     | FEMALE | Stage IB   | T2a | MX | N0 |
| TCGA-97-7554 | 775  | 0 | 83     | FEMALE | Stage IIIA | T2a | M0 | N2 |
| TCGA-86-6562 | 376  | 1 | 52     | MALE   | Stage IIA  | T2a | M0 | N1 |
| TCGA-55-6642 | 2449 | 0 | 63     | MALE   | Stage IB   | T2  | MX | N0 |
| TCGA-62-A471 | 1246 | 0 | 64     | MALE   | Stage IIB  | T2b | M0 | N1 |
| TCGA-05-5715 | 62   | 0 | 69     | FEMALE | Stage IB   | T2a | M0 | N0 |

Table S4. The gene set enrichment analysis between the high-  
and low-risk subgroups

| ID  | setSize | enrichmentScore | NES      | pvalue   | p.adjust | qvalues  | rank |
|-----|---------|-----------------|----------|----------|----------|----------|------|
| #1  | 108     | -0.78347        | -1.94129 | 1.00E-10 | 1.83E-08 | 1.61E-08 | 2117 |
| #2  | 36      | -0.82145        | -1.86182 | 1.48E-06 | 0.000135 | 0.000119 | 2602 |
| #3  | 177     | 0.447522        | 1.74263  | 1.14E-05 | 0.000696 | 0.000613 | 1920 |
| #4  | 29      | -0.81464        | -1.81128 | 2.94E-05 | 0.001154 | 0.001015 | 1887 |
| #5  | 30      | -0.80439        | -1.80192 | 3.69E-05 | 0.001154 | 0.001015 | 2709 |
| #6  | 99      | -0.65877        | -1.62257 | 3.78E-05 | 0.001154 | 0.001015 | 3031 |
| #7  | 20      | -0.83547        | -1.77066 | 8.01E-05 | 0.002094 | 0.001842 | 2594 |
| #8  | 23      | 0.773562        | 2.178365 | 0.000183 | 0.004187 | 0.003685 | 1396 |
| #9  | 72      | -0.65598        | -1.58529 | 0.000598 | 0.012162 | 0.010703 | 3027 |
| #10 | 71      | 0.540156        | 1.864178 | 0.001092 | 0.019978 | 0.017582 | 1840 |
| #11 | 164     | -0.56256        | -1.41309 | 0.001811 | 0.027615 | 0.024303 | 3027 |
| #12 | 35      | -0.71845        | -1.62488 | 0.001884 | 0.027615 | 0.024303 | 2709 |
| #13 | 57      | -0.6646         | -1.59091 | 0.001962 | 0.027615 | 0.024303 | 3431 |
| #14 | 31      | -0.73701        | -1.65933 | 0.002873 | 0.037555 | 0.033051 | 2709 |
| #15 | 113     | -0.58248        | -1.44813 | 0.003225 | 0.039339 | 0.034621 | 2709 |
| #16 | 30      | -0.72247        | -1.61841 | 0.004    | 0.045748 | 0.040261 | 2709 |
| #17 | 98      | -0.5811         | -1.42895 | 0.006952 | 0.074836 | 0.065861 | 3027 |
| #18 | 58      | -0.61572        | -1.47027 | 0.009152 | 0.092892 | 0.081752 | 3307 |
| #19 | 67      | -0.60473        | -1.45947 | 0.009645 | 0.092892 | 0.081752 | 3344 |
| #20 | 71      | -0.59293        | -1.43486 | 0.010385 | 0.095024 | 0.083627 | 2786 |
| #21 | 111     | 0.396354        | 1.433297 | 0.011518 | 0.097331 | 0.085658 | 2571 |
| #22 | 44      | 0.541685        | 1.738763 | 0.011701 | 0.097331 | 0.085658 | 2793 |
| #23 | 28      | 0.589287        | 1.768519 | 0.015211 | 0.118001 | 0.103849 | 276  |
| #24 | 28      | 0.585709        | 1.757781 | 0.015476 | 0.118001 | 0.103849 | 652  |
| #25 | 83      | -0.56495        | -1.38175 | 0.02355  | 0.169521 | 0.14919  | 3951 |
| #26 | 26      | 0.577483        | 1.717124 | 0.024085 | 0.169521 | 0.14919  | 2722 |
| #27 | 21      | -0.68579        | -1.46051 | 0.035672 | 0.241776 | 0.212779 | 919  |
| #28 | 12      | -0.75192        | -1.44868 | 0.043194 | 0.271988 | 0.239368 | 3177 |
| #29 | 193     | -0.4933         | -1.24244 | 0.04431  | 0.271988 | 0.239368 | 2998 |
| #30 | 41      | 0.47476         | 1.492806 | 0.044588 | 0.271988 | 0.239368 | 1526 |

| ID  | Name                                              |
|-----|---------------------------------------------------|
| #1  | KEGG_SYSTEMIC_LUPUS_ERYTHEMATOSUS                 |
| #2  | KEGG_INTESTINAL_IMMUNE_NETWORK_FOR_IGA_PRODUCTION |
| #3  | KEGG_FOCAL_ADHESION                               |
| #4  | KEGG_PRIMARY_IMMUNODEFICIENCY                     |
| #5  | KEGG_ALLOGRAFT_REJECTION                          |
| #6  | KEGG_T_CELL_RECEPTOR_SIGNALING_PATHWAY            |
| #7  | KEGG_ASTHMA                                       |
| #8  | KEGG_PENTOSE_PHOSPHATE_PATHWAY                    |
| #9  | KEGG_B_CELL_RECEPTOR_SIGNALING_PATHWAY            |
| #10 | KEGG_ECM_RECEPTOR_INTERACTION                     |
| #11 | KEGG_CHEMOKINE_SIGNALING_PATHWAY                  |
| #12 | KEGG_TYPE_I_DIABETES_MELLITUS                     |
| #13 | KEGG_ANTIGEN_PROCESSING_AND_PRESENTATION          |

|     |                                                |
|-----|------------------------------------------------|
| #14 | KEGG_GRAFT_VERSUS_HOST_DISEASE                 |
| #15 | KEGG_CELL_ADHESION_MOLECULES_CAMS              |
| #16 | KEGG_AUTOIMMUNE_THYROID_DISEASE                |
| #17 | KEGG_NATURAL_KILLER_CELL_MEDIATED_CYTOTOXICITY |
| #18 | KEGG_VIRAL_MYOCARDITIS                         |
| #19 | KEGG_LEISHMANIA_INFECTION                      |
| #20 | KEGG_HEMATOPOIETIC_CELL_LINEAGE                |
| #21 | KEGG_AXON_GUIDANCE                             |
| #22 | KEGG_GLUTATHIONE_METABOLISM                    |
| #23 | KEGG_RETINOL_METABOLISM                        |
| #24 | KEGG_DRUG_METABOLISM_OTHER_ENZYMES             |
| #25 | KEGG_TOLL_LIKE_RECEPTOR_SIGNALING_PATHWAY      |
| #26 | KEGG_BUTANOATE_METABOLISM                      |
| #27 | KEGG_OLFACTORY_TRANSDUCTION                    |
| #28 | KEGG_PRIMARY_BILE_ACID_BIOSYNTHESIS            |
| #29 | KEGG_CYTOKINE_CYTOKINE_RECEPTOR_INTERACTION    |
| #30 | KEGG_DRUG_METABOLISM_CYTOCHROME_P450           |

Table S5. The differential genes between the high- and low-risk subgroups

| genes   | logFC    |
|---------|----------|
| LRRC38  | 5.77209  |
| ITLN1   | 5.093469 |
| CGB5    | 5.0637   |
| SPINK4  | 5.018862 |
| WFDC5   | 4.863646 |
| MSTN    | 4.85163  |
| REG4    | 3.462981 |
| TKTL1   | 3.317839 |
| BHMT    | 3.201467 |
| PCSK2   | 2.601331 |
| WFDC12  | 2.596349 |
| CASP14  | 2.544977 |
| CYP2A6  | 2.437882 |
| FABP7   | 2.207876 |
| TM4SF20 | 2.204879 |
| PRG4    | 2.129739 |
| KRT20   | 2.108255 |
| MYBPC1  | 2.027449 |
| RHCG    | 1.969365 |
| PI3     | 1.925202 |
| SPANXB1 | 1.914373 |
| MAGEB2  | 1.873272 |
| KRT75   | 1.83063  |
| BPIFB4  | 1.819879 |
| C8A     | 1.790626 |
| NNAT    | 1.776173 |

|            |          |
|------------|----------|
| MUCL1      | 1.730919 |
| MUCL3      | 1.728357 |
| CGA        | 1.722207 |
| PNMA5      | 1.695974 |
| LINC00922  | 1.695028 |
| IL11       | 1.691951 |
| COL2A1     | 1.66523  |
| GUCA2B     | 1.648576 |
| ALPP       | 1.638716 |
| KRT81      | 1.622893 |
| PICSAR     | 1.616223 |
| GCG        | 1.610601 |
| RNA5-8SP4  | 1.610593 |
| RNA5-8SP2  | 1.607272 |
| BMX        | 1.58001  |
| IBSP       | 1.572115 |
| MAEL       | 1.563401 |
| MAGEA4     | 1.53959  |
| UPK1B      | 1.519657 |
| LINC00941  | 1.507221 |
| L1CAM      | 1.492518 |
| IGF2BP1    | 1.466408 |
| FLNC       | 1.460028 |
| AL355916.1 | 1.459204 |
| LYPD2      | 1.454452 |
| GAGE2A     | 1.45111  |
| SFRP1      | 1.444445 |
| FBN2       | 1.432985 |
| MFAP5      | 1.430841 |
| PRR20G     | 1.410451 |
| NTSR1      | 1.405714 |
| IL1A       | 1.40561  |
| AC003092.1 | 1.40216  |
| AL161431.1 | 1.394849 |
| PTPRR      | 1.384654 |
| CD177      | 1.384526 |
| UGT1A10    | 1.358814 |
| MT1A       | 1.35077  |
| ARL14      | 1.317029 |
| AC026785.3 | 1.311899 |
| WNT7A      | 1.305529 |
| AC245041.1 | 1.276577 |
| MAGEA10    | 1.265337 |
| HMGA2      | 1.263004 |
| PRSS3      | 1.2572   |
| S100A8     | 1.254445 |
| S100A2     | 1.23664  |
| SPX        | 1.234377 |
| APCDD1L    | 1.226511 |

|            |          |
|------------|----------|
| PAGE1      | 1.202966 |
| MTCO2P22   | 1.198571 |
| AC079949.1 | 1.198534 |
| ADH7       | 1.193546 |
| AKR1B10    | 1.187747 |
| CRABP1     | 1.182868 |
| GNRH2      | 1.181262 |
| UCA1       | 1.135296 |
| S100A12    | 1.134962 |
| REG1A      | 1.128967 |
| ECEL1      | 1.124277 |
| C11orf53   | 1.116484 |
| PRB3       | 1.116215 |
| TFF2       | 1.10781  |
| RPS26P47   | 1.104639 |
| SPOCK1     | 1.092716 |
| MUC5AC     | 1.091366 |
| HMGCS2     | 1.085384 |
| LINC00460  | 1.078901 |
| CYP1A1     | 1.072883 |
| AGTR2      | 1.06832  |
| MAGEA1     | 1.053921 |
| KRT17      | 1.052473 |
| LINC02617  | 1.04324  |
| CNMD       | 1.040852 |
| ELOVL3     | 1.033271 |
| AC022784.1 | 1.032325 |
| IL20RB     | 1.024204 |
| PAGE2      | 1.017271 |
| CDA        | 1.015468 |
| ADH1C      | 1.012369 |
| ANXA8      | 1.009556 |
| INHA       | 1.001223 |
| SCGB3A1    | 0.998306 |
| PRSS1      | 0.997704 |
| MIR31HG    | 0.98239  |
| MIR205HG   | 0.970571 |
| GJB3       | 0.96818  |
| EEF1A2     | 0.964264 |
| IFNWP19    | 0.960663 |
| H19        | 0.960427 |
| CLDN6      | 0.955193 |
| SERTM1     | 0.950803 |
| NFE4       | 0.94168  |
| PAX8       | 0.941592 |
| LYPD3      | 0.939495 |
| SLC10A2    | 0.937731 |
| GTSF1      | 0.935252 |
| ANKRD1     | 0.922819 |

|            |          |
|------------|----------|
| NMRAL2P    | 0.922716 |
| AC005336.1 | 0.921071 |
| MSLNL      | 0.912468 |
| HES2       | 0.910022 |
| AF274573.1 | 0.907673 |
| GNLY       | 0.898218 |
| AKAP12     | 0.894397 |
| NDP        | 0.890693 |
| FER1L6     | 0.885863 |
| INSL4      | 0.885768 |
| FOSL1      | 0.883756 |
| CLRN3      | 0.880914 |
| PPBP       | 0.880777 |
| LINC01980  | 0.869656 |
| AC018629.1 | 0.866006 |
| RASL10B    | 0.865306 |
| RNA5-8SP6  | 0.863819 |
| MMP11      | 0.861186 |
| LAMC2      | 0.855959 |
| POPDC3     | 0.850887 |
| FGF12      | 0.850674 |
| PRSS2      | 0.845783 |
| B3GALT5    | 0.835431 |
| AC239859.5 | 0.831119 |
| TGFBI      | 0.830386 |
| TMSB15A    | 0.829064 |
| MYO16-AS1  | 0.820272 |
| CYP11A1    | 0.816109 |
| CDHR5      | 0.81557  |
| AC245041.2 | 0.808441 |
| CYP4F11    | 0.803369 |
| CA2        | 0.803338 |
| PSCA       | 0.80327  |
| C11orf86   | 0.803245 |
| HOXC12     | 0.798625 |
| CDHR2      | 0.798386 |
| ANXA10     | 0.798149 |
| NCCRP1     | 0.795815 |
| LINP1      | 0.795215 |
| CSAG1      | 0.792818 |
| DKK1       | 0.790566 |
| 5_8S_rRNA  | 0.789106 |
| GKN2       | 0.788584 |
| SCX        | 0.785875 |
| AC079949.2 | 0.78538  |
| NRK        | 0.780601 |
| COL9A3     | 0.773406 |
| KLK6       | 0.770771 |
| TNS4       | 0.769407 |

|            |          |
|------------|----------|
| MSMB       | 0.767966 |
| EYA1       | 0.767228 |
| RSPO3      | 0.765168 |
| GPA33      | 0.760637 |
| LINC01133  | 0.757954 |
| VEGFC      | 0.756868 |
| TINCR      | 0.754866 |
| AL365181.2 | 0.753692 |
| AL049555.1 | 0.752942 |
| TRIM29     | 0.749249 |
| FAM83B     | 0.748794 |
| MYBPH      | 0.748191 |
| GRAMD1B    | 0.743815 |
| CES1       | 0.742699 |
| KRT6A      | 0.742239 |
| HBE1       | 0.73665  |
| KYNU       | 0.735975 |
| ANGPTL4    | 0.735081 |
| ANPEP      | 0.732464 |
| TAC3       | 0.722078 |
| KIAA0319   | 0.719836 |
| TMEM59L    | 0.718632 |
| COL11A1    | 0.718609 |
| PPP2R2C    | 0.717675 |
| CRISPLD1   | 0.714747 |
| PTGR1      | 0.712019 |
| MAGEA3     | 0.710233 |
| NPTX2      | 0.709255 |
| MAGEA6     | 0.709219 |
| CALB2      | 0.707643 |
| CYSRT1     | 0.707635 |
| AC092868.1 | 0.704609 |
| HTR1D      | 0.704323 |
| SERPINB7   | 0.703994 |
| CBR3       | 0.696425 |
| COL11A2    | 0.696299 |
| RHOV       | 0.696025 |
| LINC01559  | 0.695817 |
| SLCO1B3    | 0.691481 |
| MELTF      | 0.690413 |
| LAMA3      | 0.689228 |
| MIR193BHG  | 0.687876 |
| RAET1G     | 0.685675 |
| TMEM130    | 0.680404 |
| FNDC4      | 0.677782 |
| C16orf74   | 0.6776   |
| FGFBP2     | 0.676206 |
| DNER       | 0.674921 |
| LOXL2      | 0.672705 |



|            |          |
|------------|----------|
| LINC01511  | 0.671959 |
| LUCAT1     | 0.66749  |
| FSTL3      | 0.667241 |
| TRIM48     | 0.666802 |
| FNDC1      | 0.663844 |
| KRTDAP     | 0.661209 |
| RGS20      | 0.661032 |
| SOX11      | 0.658616 |
| F2RL2      | 0.656839 |
| AC027288.2 | 0.656682 |
| CA12       | 0.655903 |
| PCSK9      | 0.652949 |
| CLIC3      | 0.648543 |
| SLC15A1    | 0.648291 |
| G0S2       | 0.647001 |
| COL12A1    | 0.646864 |
| APOBEC1    | 0.644914 |
| CRYBG2     | 0.644128 |
| RBP2       | 0.6432   |
| SPDYC      | 0.642724 |
| KRT80      | 0.639623 |
| MAGEA12    | 0.635833 |
| NREP       | 0.634474 |
| SLC16A1    | 0.633884 |
| SERPINB5   | 0.632749 |
| AC129507.4 | 0.629909 |
| ACKR3      | 0.629565 |
| KRT16      | 0.628475 |
| COL7A1     | 0.627589 |
| APLN       | 0.626652 |
| SMOC1      | 0.626497 |
| SLC2A1     | 0.623029 |
| PDX1       | 0.621847 |
| LINC02154  | 0.621445 |
| LINC01597  | 0.621186 |
| CXCL5      | 0.61849  |
| ECEL1P2    | 0.617552 |
| AC004847.1 | 0.617163 |
| AARD       | 0.617013 |
| NUPR2      | 0.616833 |
| AP000695.2 | 0.615668 |
| TRIM16L    | 0.6126   |
| AL513318.1 | 0.611485 |
| TM4SF4     | 0.610395 |
| FSCN1      | 0.608734 |
| ITGA5      | 0.608191 |
| FBN3       | 0.608108 |
| PDPN       | 0.607668 |
| ALPG       | 0.606487 |

|            |          |
|------------|----------|
| MESP2      | 0.605643 |
| EDIL3      | 0.605614 |
| SBSN       | 0.604853 |
| MDFI       | 0.601895 |
| UGT2B15    | 0.59951  |
| ALDOB      | 0.599455 |
| GJB5       | 0.591901 |
| PLCD3      | 0.589604 |
| HHIP       | 0.58573  |
| AC073325.2 | 0.58478  |
| SHISA3     | 0.582101 |
| S100A1     | 0.581286 |
| NMU        | 0.581093 |
| LASTR      | 0.579826 |
| ACE2       | 0.576063 |
| LINC01088  | 0.576044 |
| OVOL1      | 0.575931 |
| TREML3P    | 0.575566 |
| AP000695.1 | 0.571421 |
| FAM133A    | 0.571006 |
| S100P      | 0.570569 |
| UPK2       | 0.569685 |
| TFF1       | 0.568404 |
| BCL2L10    | 0.567684 |
| PTGES      | 0.564895 |
| GLI3       | 0.564233 |
| RASD2      | 0.564024 |
| SLC7A11    | 0.562749 |
| LINC00973  | 0.555947 |
| RAET1E     | 0.555933 |
| ELFN1-AS1  | 0.554982 |
| MSLN       | 0.552235 |
| IGFBP3     | 0.552122 |
| ZFP42      | 0.551466 |
| F3         | 0.550399 |
| CYP4F3     | 0.548404 |
| SLAMF9     | 0.547683 |
| HOXA1      | 0.547573 |
| AC084375.1 | 0.547451 |
| VSIG10L    | 0.545872 |
| CHAD       | 0.543658 |
| PLPP4      | 0.542584 |
| CAV2       | 0.542116 |
| KISS1      | 0.539465 |
| TNNT2      | 0.539077 |
| HHIPL2     | 0.537751 |
| AP003119.3 | 0.537616 |
| GPAT3      | 0.535227 |
| MME        | 0.534858 |

|            |          |
|------------|----------|
| SRXN1      | 0.53441  |
| AKR1B15    | 0.533292 |
| VGLL1      | 0.531878 |
| FOXE1      | 0.528733 |
| P3H2       | 0.528104 |
| GCLC       | 0.528072 |
| PLAU       | 0.52792  |
| NR0B1      | 0.527524 |
| OPN3       | 0.526695 |
| HOXA10     | 0.524789 |
| AL109615.3 | 0.524727 |
| RPL29P19   | 0.52366  |
| ASAP2      | 0.522771 |
| CACNG4     | 0.522556 |
| PTX3       | 0.522375 |
| F2RL1      | 0.521756 |
| CNGA1      | 0.52063  |
| ARNTL2     | 0.520512 |
| PCOLCE2    | 0.519745 |
| PLEK2      | 0.51931  |
| RRAS2P1    | 0.519236 |
| AC244153.1 | 0.518306 |
| SHOX2      | 0.51749  |
| FAM171A2   | 0.517298 |
| ODC1       | 0.517188 |
| FAM3D      | 0.517069 |
| COL10A1    | 0.515255 |
| PKP2       | 0.514922 |
| BMPR1B     | 0.514747 |
| LINC01116  | 0.514415 |
| FJX1       | 0.514247 |
| AC079384.1 | 0.514222 |
| CAV1       | 0.512929 |
| FNDC5      | 0.512529 |
| PANX2      | 0.511565 |
| UGDH       | 0.509797 |
| SNAI2      | 0.507654 |
| PMEPA1     | 0.505988 |
| TSPAN8     | 0.505149 |
| FAM83A     | 0.504168 |
| SOX15      | 0.503313 |
| CABYR      | 0.501734 |
| AC102953.2 | 0.501713 |
| TSKU       | 0.500445 |
| LINGO1     | 0.49982  |
| COLCA2     | 0.499057 |
| TRIM16     | 0.498846 |
| PGC        | 0.498505 |
| FGFR3      | 0.498462 |

|            |          |
|------------|----------|
| CSF2       | 0.49842  |
| S100A9     | 0.494621 |
| TFAP2A     | 0.493706 |
| IL22RA1    | 0.493306 |
| NMB        | 0.492301 |
| SEMA6D     | 0.492011 |
| MYEOV      | 0.491965 |
| CMBL       | 0.491877 |
| VGLL3      | 0.4916   |
| ITGA6      | 0.491172 |
| CITED4     | 0.490839 |
| MAGEC1     | 0.489453 |
| ANLN       | 0.489279 |
| PGF        | 0.48909  |
| RPL23AP77  | 0.486346 |
| MSX2       | 0.486093 |
| HEPACAM2   | 0.485688 |
| CHST4      | 0.485362 |
| FAM180A    | 0.485223 |
| AIF1L      | 0.484494 |
| TNFRSF12A  | 0.480989 |
| KCNJ12     | 0.480514 |
| ADM        | 0.480422 |
| ITGA11     | 0.479909 |
| SUGCT      | 0.479518 |
| ASPH       | 0.479426 |
| SRMS       | 0.479362 |
| EMSLR      | 0.479292 |
| CTSV       | 0.479164 |
| SCAT1      | 0.478944 |
| CBR1       | 0.478857 |
| MTCO3P12   | 0.477159 |
| ALDH3A1    | 0.474757 |
| BASP1      | 0.474115 |
| KRT7       | 0.473621 |
| AC027288.3 | 0.473592 |
| STC1       | 0.47241  |
| TMEM213    | 0.471578 |
| MTCO1P40   | 0.469431 |
| GREB1      | 0.468925 |
| NAT8L      | 0.467848 |
| LAMB3      | 0.467503 |
| ADSS1      | 0.466354 |
| TCEAL2     | 0.46591  |
| ITGB1P1    | 0.462568 |
| SERPINE1   | 0.46045  |
| IGFBP6     | 0.460441 |
| EPHX3      | 0.459548 |
| BCAS1      | 0.458187 |

|            |          |
|------------|----------|
| LDLRAD3    | 0.457472 |
| MT1L       | 0.456491 |
| TCN1       | 0.45584  |
| GPR87      | 0.455525 |
| FABP5P7    | 0.455453 |
| LINC01705  | 0.455333 |
| MTCO2P12   | 0.455266 |
| CDR2L      | 0.455047 |
| ADGRG3     | 0.454962 |
| SLCO4A1    | 0.453563 |
| SDCBP2     | 0.452335 |
| MAFK       | 0.451826 |
| C5AR2      | 0.45179  |
| NOS3       | 0.451648 |
| GJB2       | 0.451465 |
| NAMPTP1    | 0.451409 |
| GSEC       | 0.450084 |
| DCBLD2     | 0.449424 |
| RHOD       | 0.449162 |
| ELFN1      | 0.448826 |
| ESM1       | 0.447858 |
| VWDE       | 0.447614 |
| UBBP1      | 0.447503 |
| ITGB1-DT   | 0.445855 |
| NKILA      | 0.445151 |
| SERPINA4   | 0.443513 |
| PHLDB2     | 0.442968 |
| CLGN       | 0.442941 |
| RAC3       | 0.442572 |
| HPDL       | 0.442344 |
| ARHGEF4    | 0.441745 |
| FASN       | 0.439873 |
| MFAP2      | 0.43956  |
| MIR100HG   | 0.439441 |
| NXPH4      | 0.439123 |
| AC106771.1 | 0.438499 |
| PODNL1     | 0.437935 |
| SLC16A3    | 0.437079 |
| CDCP1      | 0.436496 |
| LINC02544  | 0.435641 |
| GJC1       | 0.435599 |
| GUCA2A     | 0.43459  |
| LOX        | 0.434205 |
| S100A16    | 0.43401  |
| POU2F3     | 0.432652 |
| AMH        | 0.428452 |
| GABRP      | 0.427889 |
| VSIG1      | 0.427739 |
| AL365181.3 | 0.427393 |

|            |          |
|------------|----------|
| SLC16A12   | 0.427354 |
| LINC01983  | 0.42642  |
| EPHA2      | 0.426187 |
| AC104031.1 | 0.425818 |
| BCAR3      | 0.425607 |
| MYOSLID    | 0.425254 |
| UPK3B      | 0.425125 |
| HOXD8      | 0.424943 |
| RIMKLB     | 0.424858 |
| JPH2       | 0.424547 |
| BTNL10     | 0.424326 |
| KRT86      | 0.42353  |
| GPC1       | 0.423227 |
| TMPRSS3    | 0.422169 |
| IER5L      | 0.421468 |
| COL17A1    | 0.421017 |
| LRFN4      | 0.420941 |
| ADGRF4     | 0.420923 |
| IL17RD     | 0.420428 |
| NEIL3      | 0.419627 |
| C5orf46    | 0.419385 |
| PADI3      | 0.418698 |
| SLC6A3     | 0.418417 |
| TGFB2      | 0.418333 |
| IL17RE     | 0.418203 |
| HMGA1      | 0.41692  |
| KLB        | 0.416123 |
| KLK5       | 0.415966 |
| CYP2T1P    | 0.415352 |
| DIRAS1     | 0.410673 |
| TMIE       | 0.410372 |
| MAMLD1     | 0.410122 |
| ADAMTSL5   | 0.409058 |
| PRRX2      | 0.408732 |
| SPINK2     | 0.408681 |
| AVPI1      | 0.407585 |
| SHH        | 0.40646  |
| SEMA3B     | 0.40555  |
| ERRFI1     | 0.405059 |
| SLC28A2    | 0.404453 |
| CD109      | 0.404417 |
| CYP2B7P    | 0.403319 |
| SEMA7A     | 0.402395 |
| DIAPH3     | 0.401658 |
| GRHL3      | 0.401297 |
| CEMIP      | 0.401268 |
| DYNC1I1    | 0.400701 |
| PXDN       | 0.400271 |
| AL033397.1 | 0.400172 |

|            |          |
|------------|----------|
| TMPRSS11E  | 0.399888 |
| COL4A5     | 0.398702 |
| PCDH7      | 0.398364 |
| PROCR      | 0.398144 |
| HOXB13     | 0.397985 |
| ZIC2       | 0.39789  |
| LINC02577  | 0.397522 |
| TRIM17     | 0.396083 |
| TNS1-AS1   | 0.39597  |
| SLC45A1    | 0.395875 |
| CKMT1A     | 0.395857 |
| GPC6       | 0.395307 |
| B3GNT4     | 0.395225 |
| LINC01614  | 0.394671 |
| BTBD11     | 0.394516 |
| HSPA6      | 0.394307 |
| TGM1       | 0.39408  |
| AC091042.1 | 0.394066 |
| PLOD2      | 0.394019 |
| ASPN       | 0.393147 |
| AP001574.1 | 0.392896 |
| C19orf33   | 0.39284  |
| ELANE      | 0.392616 |
| EPS8L3     | 0.391321 |
| GPM6A      | 0.390199 |
| MT2A       | 0.38988  |
| ZP3        | 0.389428 |
| TNNT1      | 0.389137 |
| EGF        | 0.388701 |
| FXD4       | 0.387733 |
| FBXO2      | 0.387316 |
| LYRM4-AS1  | 0.387233 |
| MMP17      | 0.385868 |
| PLAT       | 0.385596 |
| HS3ST3A1   | 0.385508 |
| ITGB4      | 0.385107 |
| AL512274.1 | 0.384942 |
| GCLM       | 0.384723 |
| SDK2       | 0.384639 |
| RNU6-1161P | 0.383794 |
| PCSK6      | 0.383638 |
| PWWP3B     | 0.383536 |
| NDUFA4L2   | 0.383352 |
| SLITRK6    | 0.383018 |
| RSPO1      | 0.382522 |
| TUBA3C     | 0.380925 |
| TDRD5      | 0.380823 |
| IGF2BP3    | 0.380714 |
| CSPG4      | 0.380246 |

|            |          |
|------------|----------|
| RADIL      | 0.379929 |
| ANO1       | 0.379357 |
| MAGEA8     | 0.379111 |
| KISS1R     | 0.378499 |
| AMDHD1     | 0.378383 |
| CLDN8      | 0.377821 |
| RNF223     | 0.377513 |
| MYO1E      | 0.37751  |
| TGFB2-AS1  | 0.376593 |
| EPHB3      | 0.376442 |
| PLAUR      | 0.376209 |
| RHOF       | 0.376175 |
| MEDAG      | 0.375882 |
| AP003119.1 | 0.375683 |
| NACAD      | 0.375672 |
| RHBDL2     | 0.375643 |
| EGFR       | 0.375475 |
| KANK4      | 0.374736 |
| LGR5       | 0.373003 |
| AATK       | 0.372343 |
| GSTA1      | 0.370769 |
| PGD        | 0.369878 |
| PDGFA      | 0.369356 |
| PNMT       | 0.368944 |
| RPL37P23   | 0.36893  |
| CDH3       | 0.368545 |
| IER3       | 0.368129 |
| HOXA4      | 0.367723 |
| NGEF       | 0.367637 |
| AKR1C1     | 0.367627 |
| CAP2       | 0.367278 |
| STC2       | 0.366589 |
| TXNRD1     | 0.366241 |
| LINC02041  | 0.366117 |
| NIPAL1     | 0.365847 |
| AZU1       | 0.365388 |
| GPX8       | 0.365127 |
| PROM2      | 0.364543 |
| ITGB1      | 0.364073 |
| FIBCD1     | 0.363902 |
| SEMA3C     | 0.363341 |
| NID2       | 0.363171 |
| ARTN       | 0.362665 |
| LETM2      | 0.362162 |
| TWIST2     | 0.362119 |
| MCAM       | 0.361878 |
| AC027288.1 | 0.360789 |
| DLX4       | 0.360073 |
| NT5E       | 0.360052 |



|            |          |
|------------|----------|
| TINAGL1    | 0.358753 |
| PPIAP29    | 0.358349 |
| BCAT1      | 0.358088 |
| ARPC1A     | 0.357184 |
| AC002401.4 | 0.356951 |
| TTC22      | 0.356735 |
| AMOTL2     | 0.356733 |
| TUBB6      | 0.356707 |
| ULBP2      | 0.356516 |
| THBS2      | 0.356391 |
| RIN1       | 0.356223 |
| PLEKHG4B   | 0.356089 |
| MT2P1      | 0.35589  |
| LINC01508  | 0.355546 |
| NME2P1     | 0.354708 |
| C8B        | 0.354355 |
| AC121757.1 | 0.353802 |
| AC022613.1 | 0.353223 |
| AC063948.1 | 0.353068 |
| MET        | 0.352725 |
| FAM83A-AS1 | 0.352555 |
| BZW1P2     | 0.351765 |
| AC092171.2 | 0.351623 |
| PRAME      | 0.35121  |
| PTK6       | 0.350884 |
| MSX1       | 0.350415 |
| TES        | 0.34956  |
| HSPA1A     | 0.349044 |
| MMP10      | 0.348733 |
| BAIAP2L1   | 0.348704 |
| TGFA       | 0.348583 |
| GALNT3     | 0.347751 |
| SLC6A8     | 0.347298 |
| PPP1R1C    | 0.346929 |
| SIK1       | 0.346708 |
| MB21D2     | 0.346614 |
| SRPX       | 0.346563 |
| TK1        | 0.346444 |
| AMN        | 0.346402 |
| ADAM9      | 0.346346 |
| UBE2SP1    | 0.345859 |
| CHODL      | 0.345058 |
| CSAG3      | 0.344978 |
| RPL37P2    | 0.344969 |
| THSD4      | 0.344747 |
| IL1R2      | 0.344095 |
| HEPH       | 0.342916 |
| LSP1P4     | 0.342837 |
| GATA3      | 0.342824 |

|            |          |
|------------|----------|
| SLC10A4    | 0.342595 |
| HAS1       | 0.342041 |
| RPL7P1     | 0.341439 |
| IGF2BP2    | 0.34092  |
| LRRC17     | 0.339971 |
| RARG       | 0.339003 |
| CYP24A1    | 0.338997 |
| HPGD       | 0.338728 |
| WNT7B      | 0.338356 |
| SCARF2     | 0.337606 |
| KREMEN2    | 0.337549 |
| OBSL1      | 0.337539 |
| GPC2       | 0.33751  |
| PLEKHG6    | 0.336462 |
| INAVA      | 0.336052 |
| ABCC2      | 0.335827 |
| TPTEP1     | 0.335336 |
| GRIN2D     | 0.335018 |
| EFNA5      | 0.334969 |
| CDK6       | 0.334511 |
| HNRNPA1P10 | 0.334112 |
| HNFA4      | 0.333552 |
| CAMK2N1    | 0.333549 |
| ZNF185     | 0.332858 |
| MUC21      | 0.332663 |
| ENPP1      | 0.332426 |
| PLK2       | 0.332421 |
| IGF1R      | 0.332218 |
| C6orf52    | 0.332079 |
| ITPKA      | 0.332041 |
| EPHB6      | 0.331108 |
| TRIL       | 0.331093 |
| FSCN2      | 0.330977 |
| DLG5       | 0.330421 |
| LAD1       | 0.330405 |
| METRNL     | 0.330032 |
| EVA1B      | 0.329627 |
| AC233266.2 | 0.329398 |
| NTM        | 0.329305 |
| RBPMS2     | 0.32918  |
| RHCE       | 0.329058 |
| MIA        | 0.328209 |
| RPL4P4     | 0.328145 |
| HGD        | 0.327908 |
| CHIA       | 0.327821 |
| CGREF1     | 0.327235 |
| RBP1       | 0.32721  |
| AGR2       | 0.326768 |
| SLC22A31   | 0.32675  |

|            |          |
|------------|----------|
| AL512413.1 | 0.326202 |
| WNT5A-AS1  | 0.326183 |
| SSC4D      | 0.325558 |
| NOTCH3     | 0.325448 |
| FZD10      | 0.325132 |
| PTPRU      | 0.325123 |
| PRR19      | 0.325121 |
| SH3RF2     | 0.325078 |
| GPX3       | 0.32486  |
| RGS2       | 0.324664 |
| WBP1LP2    | 0.324285 |
| FAM71E1    | 0.323963 |
| RPL37P6    | 0.323708 |
| PPFIBP1    | 0.323207 |
| BARX2      | 0.32309  |
| ALPL       | 0.322868 |
| KCTD15     | 0.322716 |
| MTCL1      | 0.322533 |
| MYRF       | 0.322187 |
| HSP90AB3P  | 0.321315 |
| OSMR       | 0.321293 |
| MUC5B      | 0.320897 |
| IL1RL1     | 0.320849 |
| PLA2G2A    | 0.320779 |
| AC004233.2 | 0.320732 |
| CLMP       | 0.320675 |
| MAPK4      | 0.320329 |
| CILP2      | 0.319764 |
| KRT18      | 0.319419 |
| RNF39      | 0.319359 |
| AL645608.7 | 0.319202 |
| ITGA2      | 0.319135 |
| H2AC6      | 0.319133 |
| AC068299.1 | 0.319121 |
| SNTA1      | 0.318531 |
| RPS24P19   | 0.318503 |
| SPOCD1     | 0.318307 |
| SLC35F2    | 0.31822  |
| RETN       | 0.318151 |
| HSPA12A    | 0.31803  |
| MTARC1     | 0.317924 |
| LINC01137  | 0.317846 |
| OSGIN1     | 0.31774  |
| TMEM92     | 0.316054 |
| KRT19      | 0.314412 |
| HORMAD1    | 0.313494 |
| S100A14    | 0.313382 |
| AL590666.2 | 0.313382 |
| ARHGEF35   | 0.312531 |

|            |          |
|------------|----------|
| MEX3A      | 0.312327 |
| ST3GAL4    | 0.312023 |
| AKR1C2     | 0.311296 |
| FBXO17     | 0.31081  |
| TMEM158    | 0.310711 |
| EFNA3      | 0.309912 |
| AC010643.1 | 0.309807 |
| TPBG       | 0.309258 |
| LRRC4B     | 0.309206 |
| MFAP3L     | 0.309045 |
| CSPG5      | 0.308764 |
| CHIAP2     | 0.308667 |
| AL591178.1 | 0.308473 |
| B4GALNT1   | 0.30839  |
| S100A10    | 0.307715 |
| CPAMD8     | 0.307569 |
| AL450405.1 | 0.307276 |
| TMPRSS6    | 0.307047 |
| RPL41P2    | 0.306717 |
| MXRA7P1    | 0.306279 |
| FERMT1     | 0.306012 |
| PHLDA2     | 0.305479 |
| RGS4       | 0.304578 |
| LINC01503  | 0.304266 |
| TM4SF1-AS1 | 0.304111 |
| LINC01607  | 0.304004 |
| FSTL1      | 0.303809 |
| EDN1       | 0.303727 |
| HCG4       | 0.303535 |
| MEIS3P1    | 0.303513 |
| DCST2      | 0.303416 |
| FHL2       | 0.303004 |
| G6PD       | 0.302584 |
| H2AW       | 0.30241  |
| PF4        | 0.302094 |
| AC105290.1 | 0.301955 |
| E2F7       | 0.301912 |
| MESP1      | 0.301597 |
| DIO2       | 0.30073  |
| HSPB1P1    | 0.299416 |
| TIMP2      | 0.298727 |
| GFPT2      | 0.298191 |
| BMP1       | 0.298191 |
| PRDM16-DT  | 0.297707 |
| HYAL3      | 0.297666 |
| TUBA4A     | 0.297215 |
| CCND3      | 0.296771 |
| PDLIM4     | 0.29673  |
| EDN2       | 0.296691 |

|            |          |
|------------|----------|
| PPP1R13L   | 0.296439 |
| GREM1      | 0.296367 |
| KCNQ4      | 0.296335 |
| ASPG       | 0.296273 |
| CST6       | 0.29562  |
| SLC2A3     | 0.295426 |
| KRT8P3     | 0.295345 |
| SMOX       | 0.295182 |
| LINC01139  | 0.295176 |
| SERINC2    | 0.294791 |
| RN7SKP97   | 0.294443 |
| SIK1B      | 0.294417 |
| NPAS3      | 0.294175 |
| SPP1       | 0.293898 |
| CASC9      | 0.293548 |
| MARVELD1   | 0.29341  |
| MISP       | 0.293273 |
| AP001505.1 | 0.293272 |
| LINC02122  | 0.293032 |
| MMP14      | 0.29299  |
| TMEM200B   | 0.292974 |
| ACKR2      | 0.292777 |
| PIR        | 0.292718 |
| SLC7A4     | 0.29245  |
| PXN        | 0.292119 |
| CXCL8      | 0.291854 |
| TRIP6      | 0.291847 |
| TM4SF5     | 0.291557 |
| AL355032.1 | 0.29141  |
| ZNF114     | 0.291328 |
| NANOS1     | 0.291311 |
| FGF9       | 0.291234 |
| THEM5      | 0.291203 |
| POLR3H     | 0.290869 |
| DIO1       | 0.290748 |
| FOXA2      | 0.290656 |
| WNT5A      | 0.290465 |
| EPHB4      | 0.289932 |
| AGRN       | 0.289488 |
| THBS1      | 0.289348 |
| MGST1      | 0.289336 |
| PKP1       | 0.289227 |
| TMEM54     | 0.288931 |
| CLDN18     | 0.288861 |
| OLFML2A    | 0.28867  |
| FKBP4      | 0.288514 |
| SNCG       | 0.288474 |
| COL4A2     | 0.288443 |
| EPHX4      | 0.288375 |

|            |          |
|------------|----------|
| RND3       | 0.288224 |
| PAGE2B     | 0.288163 |
| NOX1       | 0.287662 |
| B3GNT3     | 0.287546 |
| PKM        | 0.28744  |
| NQO1       | 0.287417 |
| MIR1915HG  | 0.287146 |
| BCHE       | 0.286824 |
| PNMA8A     | 0.286819 |
| AC015922.2 | 0.286593 |
| MEG3       | 0.286509 |
| EPN3       | 0.286189 |
| TLCD2      | 0.28595  |
| CLTB       | 0.285788 |
| C6orf132   | 0.285669 |
| CMAS       | 0.285585 |
| INHBA      | 0.28514  |
| AL603825.1 | 0.285002 |
| NDRG1      | 0.284473 |
| HHIPL1     | 0.284267 |
| GPC5       | 0.283943 |
| TRIM54     | 0.283645 |
| LINC02298  | 0.283584 |
| HSP90AB2P  | 0.283453 |
| PLOD1      | 0.283025 |
| GPR39      | 0.282947 |
| DNMT3B     | 0.282773 |
| SLC44A3    | 0.282748 |
| PDLIM7     | 0.282708 |
| TSPAN7     | 0.282659 |
| ZNF503-AS1 | 0.282586 |
| SLC35C1    | 0.281693 |
| H1-12P     | 0.281683 |
| KRAS       | 0.281142 |
| TRO        | 0.280789 |
| CTPS1      | 0.28075  |
| AC025575.2 | 0.280634 |
| NPAS2      | 0.280431 |
| PRR11      | 0.28019  |
| LRRC26     | 0.280028 |
| SERPINA5   | 0.279623 |
| RNF212     | 0.279212 |
| KIF7       | 0.279025 |
| AF201337.1 | 0.278962 |
| EPHX1      | 0.278932 |
| SPRY4      | 0.278904 |
| SOWAHC     | 0.27874  |
| GBE1       | 0.27852  |
| NAMPT      | 0.278374 |

|            |          |
|------------|----------|
| ASPHD1     | 0.278145 |
| CDH13      | 0.278014 |
| SYDE1      | 0.277693 |
| NPR3       | 0.277693 |
| EFHD1      | 0.277504 |
| BCAR1      | 0.277462 |
| COL5A1     | 0.277447 |
| TNFSF9     | 0.277007 |
| EFNB2      | 0.276932 |
| USP43      | 0.276764 |
| DLGAP1-AS2 | 0.276743 |
| PLA2G10    | 0.276551 |
| PAQR5      | 0.276429 |
| RGMA       | 0.276428 |
| TMEM40     | 0.275802 |
| C1QTNF6    | 0.275756 |
| GRB10      | 0.275726 |
| HSPA1B     | 0.275621 |
| SHC1       | 0.275469 |
| TEAD4      | 0.275305 |
| RPL7AP30   | 0.274611 |
| COL5A2     | 0.27435  |
| BMP4       | 0.274319 |
| AC018816.1 | 0.274258 |
| B4GALT2    | 0.27424  |
| PRKAR1B    | 0.274214 |
| ULBP3      | 0.274097 |
| CDH15      | 0.274032 |
| PKIB       | 0.273853 |
| SPINT1     | 0.273675 |
| NKX3-1     | 0.273376 |
| GIN54      | 0.273205 |
| LOXL1-AS1  | 0.272453 |
| FXRD3      | 0.272375 |
| LRP8       | 0.272287 |
| AC025062.1 | 0.272167 |
| IFITM10    | 0.272092 |
| SP8        | 0.272043 |
| HLA-V      | 0.271768 |
| ZNF677     | 0.271734 |
| SP6        | 0.271527 |
| KLC3       | 0.27125  |
| AK4        | 0.270998 |
| GPR176     | 0.270954 |
| EFNB1      | 0.270753 |
| LIPH       | 0.27064  |
| AC018475.1 | 0.270504 |
| FOXQ1      | 0.270428 |
| ATP6V1C2   | 0.27021  |

|            |          |
|------------|----------|
| PLIN3      | 0.269851 |
| HLA-G      | 0.269696 |
| TEAD3      | 0.269637 |
| AC093673.1 | 0.269116 |
| PTPRH      | 0.269032 |
| SLC51B     | 0.268995 |
| ANXA2P2    | 0.268881 |
| AP002761.4 | 0.268686 |
| MIR9-3HG   | 0.268508 |
| CPXM2      | 0.268487 |
| RRAS2      | 0.268238 |
| ANKRD34B   | 0.268223 |
| AL445524.1 | 0.268167 |
| CHCHD2P2   | 0.268164 |
| HHLA2      | 0.26779  |
| TP1P1      | 0.267732 |
| GPRC5C     | 0.267693 |
| MAGEC2     | 0.267348 |
| EXO1       | 0.26721  |
| MCEMP1     | 0.267132 |
| OLA1P1     | 0.266977 |
| PTGER1     | 0.266942 |
| GABRA3     | 0.266906 |
| AC096536.2 | 0.266751 |
| RN7SL368P  | 0.266612 |
| PFKP       | 0.266472 |
| CCT6A      | 0.266188 |
| GSTO2      | 0.265687 |
| FOXL1      | 0.265605 |
| PLAAT1     | 0.265317 |
| CKMT1B     | 0.265307 |
| WFDC1      | 0.264897 |
| KIF2C      | 0.26483  |
| FAM83G     | 0.264633 |
| LINC00857  | 0.264491 |
| AL390719.1 | 0.264455 |
| AC010547.2 | 0.264336 |
| AC105020.1 | 0.264185 |
| FKBP9P1    | 0.264153 |
| ORC1       | 0.264068 |
| COL6A1     | 0.263463 |
| FBXL16     | 0.263324 |
| RAP1GAP    | 0.262877 |
| PCDHGB5    | 0.262842 |
| MYOF       | 0.262756 |
| RANBP1P1   | 0.262685 |
| COL4A1     | 0.262241 |
| AUNIP      | 0.261726 |
| BX640514.2 | 0.261591 |



|            |          |
|------------|----------|
| GUCY2C     | 0.261438 |
| AF064858.1 | 0.261431 |
| SNAI1      | 0.261026 |
| POF1B      | 0.260959 |
| COL15A1    | 0.260814 |
| TSPAN1     | 0.260708 |
| PSMG3-AS1  | 0.260616 |
| DLX3       | 0.26032  |
| ZNF385B    | 0.260061 |
| PTGS2      | 0.260019 |
| GPR153     | 0.259878 |
| AHNAK2     | 0.25961  |
| BCL9L      | 0.259311 |
| AC104695.2 | 0.259192 |
| ANXA1      | 0.258941 |
| GCNT3      | 0.258883 |
| DLK2       | 0.258874 |
| RPL14P1    | 0.258041 |
| AC108451.2 | 0.257972 |
| SOX9       | 0.257482 |
| FABP3      | 0.257463 |
| RPP40      | 0.257452 |
| STAC2      | 0.257309 |
| COL5A3     | 0.257301 |
| STAC       | 0.256999 |
| CERCAM     | 0.256956 |
| FBXL18     | 0.256935 |
| FHOD3      | 0.256919 |
| OMD        | 0.256897 |
| MECOM-AS1  | 0.256667 |
| MUC15      | 0.255858 |
| SPHK1      | 0.255768 |
| ADAMTSL4   | 0.255662 |
| MIR210     | 0.255537 |
| TPX2       | 0.255353 |
| CBX2       | 0.255322 |
| AC079922.1 | 0.25526  |
| IL1RAP     | 0.255018 |
| ANTXR1     | 0.254863 |
| TIMP3      | 0.254789 |
| TFAP2E     | 0.25474  |
| AR         | 0.254667 |
| TMEM52     | 0.254607 |
| FGF1       | 0.254154 |
| TUFT1      | 0.254029 |
| GAPDHP65   | 0.253979 |
| RPL13AP20  | 0.253815 |
| ACTBP12    | 0.253759 |
| WDR72      | 0.253407 |

|            |          |
|------------|----------|
| LGALS4     | 0.253361 |
| AL136126.1 | 0.253298 |
| AC073861.1 | 0.253289 |
| JAG1       | 0.253199 |
| TBX1       | 0.252961 |
| AC246787.1 | 0.252549 |
| SHISAL1    | 0.252544 |
| SMURF1     | 0.252495 |
| PRSS22     | 0.252185 |
| TDP2       | 0.252165 |
| TMEM139    | 0.251969 |
| ADGRD1     | 0.251803 |
| RHOC       | 0.251527 |
| FOSL2      | 0.251512 |
| AC010998.3 | 0.251431 |
| ADRA1B     | 0.251237 |
| MTX1P1     | 0.251126 |
| PYGL       | 0.251061 |
| CALU       | 0.250959 |
| AL355312.3 | 0.250796 |
| FGFRL1     | 0.250602 |
| VCL        | 0.250572 |
| ITGA3      | 0.250514 |
| INF2       | 0.250236 |
| C1QL3      | 0.250217 |
| GAPDH      | 0.250049 |
| GABRD      | 0.250032 |
| SLC2A10    | 0.25001  |
| OTX1       | 0.249879 |
| DDIT4      | 0.249379 |
| BMERB1     | 0.249289 |
| RPL37AP1   | 0.249272 |
| CD300E     | 0.249237 |
| COL1A2     | 0.24903  |
| SEMA3F     | 0.248965 |
| TNFAIP6    | 0.248325 |
| SYT12      | 0.247943 |
| TUBA1C     | 0.247917 |
| PLEC       | 0.247744 |
| OLFM2      | 0.247719 |
| AC099850.3 | 0.247693 |
| DUSP9      | 0.247625 |
| AL109936.2 | 0.247536 |
| COL1A1     | 0.247179 |
| LAMA5      | 0.247105 |
| GDPD3      | 0.246929 |
| BMS1P10    | 0.246778 |
| HKDC1      | 0.246684 |
| MYO1C      | 0.246674 |

|            |          |
|------------|----------|
| PEX6       | 0.246431 |
| GALNT2     | 0.246315 |
| CHP1       | 0.245935 |
| AC044787.1 | 0.245872 |
| AC068580.4 | 0.245686 |
| ASIC1      | 0.245604 |
| PGM2       | 0.245528 |
| TMEM171    | 0.245267 |
| TAX1BP3    | 0.24513  |
| SPINT1-AS1 | 0.245    |
| DVL1       | 0.244759 |
| FOLR1      | 0.244689 |
| SEC14L4    | 0.244636 |
| CDKN1C     | 0.244586 |
| SLC4A3     | 0.244495 |
| GAL3ST1    | 0.244446 |
| DLX5       | 0.24443  |
| BRINP1     | 0.244424 |
| FBXO27     | 0.244292 |
| MAB21L4    | 0.244256 |
| RPL26P30   | 0.244106 |
| NLRP2      | 0.243915 |
| RPS3AP5    | 0.2438   |
| UCN        | 0.243704 |
| STEAP1B    | 0.243651 |
| IRX3       | 0.243519 |
| AC008556.1 | 0.243248 |
| HOXC10     | 0.243159 |
| AC078925.4 | 0.242936 |
| AMIGO2     | 0.242294 |
| HSPA2      | 0.242289 |
| ADAMTS5    | 0.242066 |
| C1QTNF12   | 0.241862 |
| CXADR      | 0.2417   |
| IGSF21     | 0.241425 |
| KRTCAP3    | 0.241345 |
| ARSI       | 0.241101 |
| TSPAN13    | 0.240778 |
| AC005993.1 | 0.240669 |
| AL139288.1 | 0.240476 |
| CYBRD1     | 0.24005  |
| TALDO1     | 0.240014 |
| LINC00960  | 0.239916 |
| GSR        | 0.239625 |
| NSMF       | 0.23962  |
| SKP2       | 0.23954  |
| TTLL12     | 0.239517 |
| MEAK7      | 0.239444 |
| PERP       | 0.239318 |

|            |          |
|------------|----------|
| AC009065.5 | 0.239259 |
| PMF1-BGLAP | 0.238995 |
| SETP14     | 0.238895 |
| PACSIN3    | 0.238697 |
| TM4SF1     | 0.238622 |
| AC023024.2 | 0.23802  |
| MMP15      | 0.237936 |
| MUC20      | 0.237897 |
| GPRC5A     | 0.237877 |
| GPR37      | 0.237836 |
| OGN        | 0.237361 |
| MBOAT7     | 0.237176 |
| COL8A1     | 0.237023 |
| CD151      | 0.236994 |
| SIX5       | 0.236934 |
| RPL10AP6   | 0.236918 |
| TNFRSF1A   | 0.236869 |
| TJP1       | 0.236809 |
| MAOA       | 0.236609 |
| HACD1      | 0.236583 |
| SLC22A17   | 0.236311 |
| RPL7P47    | 0.236239 |
| SPINK1     | 0.235441 |
| UPK3A      | 0.235419 |
| TCEAL7     | 0.235358 |
| SPECC1     | 0.235319 |
| TENM3      | 0.235291 |
| KRT8       | 0.235276 |
| MFSD12     | 0.234944 |
| KDELR3     | 0.234826 |
| NCS1       | 0.234631 |
| RTN4RL1    | 0.234504 |
| DAG1       | 0.234186 |
| FLNB       | 0.234075 |
| CCT5       | 0.233862 |
| PTPRF      | 0.233743 |
| NT5DC2     | 0.233719 |
| CAPZA2     | 0.233634 |
| LRRC8A     | 0.23359  |
| SEMA3B-AS1 | 0.23357  |
| ZNF467     | 0.233454 |
| TUBB       | 0.23315  |
| PGM1       | 0.233138 |
| SFN        | 0.233116 |
| BAG2       | 0.233111 |
| IMPDH1     | 0.233091 |
| TMEM217    | 0.233064 |
| PARD3      | 0.232902 |
| NFE2       | 0.232866 |

|              |          |
|--------------|----------|
| PTTG1IP      | 0.232845 |
| DRGX         | 0.23278  |
| MEIS3P2      | 0.232411 |
| AC107959.3   | 0.232102 |
| EHD2         | 0.23175  |
| AC079250.1   | 0.231641 |
| RPL6P27      | 0.231624 |
| MAP3K4-AS1   | 0.231567 |
| NECTIN1      | 0.231328 |
| ANXA3        | 0.231325 |
| AC024293.1   | 0.231312 |
| EIF5AL1      | 0.231298 |
| MT1X         | 0.231282 |
| ITGB5        | 0.231251 |
| PODXL2       | 0.231241 |
| LTBP1        | 0.231029 |
| C10orf55     | 0.230951 |
| BAIAP2       | 0.230856 |
| GSDME        | 0.230854 |
| ATP8B3       | 0.230765 |
| RPS14P8      | 0.230683 |
| GALNT12      | 0.230622 |
| HOXC6        | 0.230219 |
| HPCAL1       | 0.230195 |
| NUMBL        | 0.230174 |
| GAMT         | 0.230113 |
| PTPRS        | 0.229984 |
| PPP1R14B-AS1 | 0.229931 |
| PMEL         | 0.229288 |
| KIRREL1      | 0.229189 |
| PPDPF        | 0.228937 |
| ADAMTS2      | 0.228936 |
| TNFRSF10D    | 0.228934 |
| CSGALNACT1   | 0.228614 |
| VILL         | 0.228551 |
| COBL         | 0.2285   |
| NAB2         | 0.228424 |
| TRIM31-AS1   | 0.228319 |
| PROSER2      | 0.228112 |
| CHSY3        | 0.228027 |
| C15orf48     | 0.228023 |
| VDAC2P5      | 0.228008 |
| ACOT11       | 0.227728 |
| PPL          | 0.227693 |
| MLXIPL       | 0.227689 |
| KIAA1522     | 0.227564 |
| PRKCZ        | 0.227471 |
| TOB2P1       | 0.22747  |
| NIBAN2       | 0.227397 |

|            |          |
|------------|----------|
| SLC35B2    | 0.227303 |
| RORC       | 0.227134 |
| RTN4R      | 0.227037 |
| LAMC3      | 0.226872 |
| ATP6V1B1   | 0.226838 |
| KIFC1      | 0.226823 |
| AC092118.1 | 0.226804 |
| DUSP7      | 0.226141 |
| TSC22D2    | 0.226013 |
| EHHADH     | 0.226    |
| BVES       | 0.225979 |
| VPS37D     | 0.225853 |
| AC002467.1 | 0.225721 |
| AC130371.2 | 0.225615 |
| SERPINH1   | 0.225524 |
| LLGL1      | 0.225511 |
| TOR4A      | 0.225203 |
| ADGRD1-AS1 | 0.225106 |
| CD276      | 0.224833 |
| KRT87P     | 0.224822 |
| OIP5       | 0.224803 |
| HOXC8      | 0.224445 |
| ADAMTS12   | 0.224438 |
| PPP1R3G    | 0.22439  |
| MALINC1    | 0.224233 |
| DSG2       | 0.224208 |
| NPM1P27    | 0.224118 |
| ARL4D      | 0.224117 |
| PLEKHN1    | 0.224103 |
| IQGAP3     | 0.224087 |
| AL109761.1 | 0.223987 |
| DNAJB4     | 0.223854 |
| LINC02814  | 0.223441 |
| MXRA5      | 0.222726 |
| ALDOA      | 0.222607 |
| ADGRL2     | 0.222485 |
| NTF4       | 0.22241  |
| ERVH48-1   | 0.222315 |
| RPS7P10    | 0.222215 |
| AC027763.2 | 0.222153 |
| TMCC3      | 0.222041 |
| LDHD       | 0.221954 |
| MKX        | 0.221869 |
| LINC02555  | 0.221865 |
| LINC02762  | 0.221614 |
| SPRED3     | 0.221486 |
| GRP        | 0.22141  |
| GAS1       | 0.221234 |
| LMNA       | 0.221117 |

|            |          |
|------------|----------|
| C17orf107  | 0.221005 |
| LAMC1      | 0.220963 |
| LRRN4      | 0.220851 |
| MRPS24     | 0.220795 |
| COPS6      | 0.220792 |
| SH2D3A     | 0.220413 |
| P4HA1      | 0.22011  |
| PRRT3-AS1  | 0.219685 |
| KCNMB4     | 0.219622 |
| VARs1      | 0.219581 |
| FGFR1      | 0.21943  |
| AC125807.2 | 0.219426 |
| BZW2       | 0.219364 |
| DSCAM-AS1  | 0.219302 |
| SPARC      | 0.219257 |
| LTBR       | 0.219049 |
| HRH1       | 0.218878 |
| LINC02253  | 0.21884  |
| SEMA4G     | 0.218503 |
| SLC9A2     | 0.218309 |
| C1orf226   | 0.218075 |
| GYG2       | 0.21803  |
| EHBP1      | 0.217997 |
| ABHD11-AS1 | 0.21739  |
| CAVIN1     | 0.217216 |
| CARD14     | 0.217105 |
| ABCC1      | 0.217073 |
| RNF24      | 0.21695  |
| H1-2       | 0.21694  |
| FANCE      | 0.21675  |
| DCXR       | 0.216722 |
| TM2D2      | 0.216714 |
| SKA3       | 0.2167   |
| ANXA2      | 0.216635 |
| TMEM38A    | 0.21657  |
| ETNPPL     | 0.215993 |
| ARHGAP11A  | 0.215955 |
| EPS8L1     | 0.215856 |
| NME4       | 0.215788 |
| CLDN9      | 0.215757 |
| MYC        | 0.215641 |
| RPS24P8    | 0.215556 |
| USH1C      | 0.215239 |
| PHETA1     | 0.215077 |
| LINC01842  | 0.215042 |
| POLR1G     | 0.215032 |
| FTH1P2     | 0.214978 |
| ABCC3      | 0.214967 |
| PC         | 0.214962 |

|            |          |
|------------|----------|
| FAM114A1   | 0.214744 |
| CCL7       | 0.214546 |
| ACTN1      | 0.21437  |
| ENTPD2     | 0.214326 |
| DBN1       | 0.214132 |
| SEMA4B     | 0.213917 |
| AP2M1      | 0.213372 |
| ADGRB2     | 0.213315 |
| FOXM1      | 0.213254 |
| RAB23      | 0.213208 |
| SAMD13     | 0.213107 |
| RPL18AP3   | 0.212998 |
| P4HA2      | 0.212924 |
| ANGPT2     | 0.212904 |
| LINC02864  | 0.212893 |
| AC116533.1 | 0.212834 |
| AL353693.1 | 0.212822 |
| PRXL2B     | 0.212699 |
| FAM81A     | 0.212682 |
| SNX33      | 0.212601 |
| ZNF667-AS1 | 0.212585 |
| DAAM2      | 0.212222 |
| MROH6      | 0.212092 |
| AC136475.3 | 0.212089 |
| ATG9B      | 0.212059 |
| PDGFB      | 0.212028 |
| MUC3A      | 0.212016 |
| SCRN1      | 0.211879 |
| COMP       | 0.211799 |
| H2BC5      | 0.211798 |
| NDUFA4P1   | 0.211673 |
| PPP1R14B   | 0.210707 |
| CCBE1      | 0.210338 |
| PPARG      | 0.210277 |
| TRPM2-AS   | 0.21025  |
| SYCE3      | 0.210073 |
| ZNF280B    | 0.209784 |
| SLC35E4    | 0.209694 |
| AL080243.1 | 0.20939  |
| ZNF469     | 0.209357 |
| AC011495.1 | 0.209279 |
| AMOTL1     | 0.2092   |
| AC034236.1 | 0.209121 |
| SUMO2P21   | 0.208892 |
| GRIP1      | 0.208556 |
| MCM7       | 0.208322 |
| TKT        | 0.208055 |
| TUBB3      | 0.207999 |
| CCDC3      | 0.207951 |



|            |          |
|------------|----------|
| ARHGAP23   | 0.207837 |
| CDC20      | 0.207824 |
| PODXL      | 0.207823 |
| AC107294.2 | 0.207711 |
| EEF1A1P13  | 0.20757  |
| ATP6V0A4   | 0.20749  |
| TPD52L1    | 0.207232 |
| TMEM63B    | 0.207178 |
| TAGLN      | 0.20709  |
| PIP        | 0.206763 |
| RCN3       | 0.206591 |
| EXTL2      | 0.206353 |
| HIBADH     | 0.206334 |
| PPIAP31    | 0.206277 |
| AL122020.1 | 0.206189 |
| AC245100.5 | 0.206159 |
| RPSAP54    | 0.206152 |
| TPM2       | 0.206111 |
| HOXC13     | 0.206083 |
| BACE2      | 0.206011 |
| BYSL       | 0.205989 |
| NEDD4      | 0.205521 |
| S100A3     | 0.205517 |
| C1orf53    | 0.205411 |
| EFNB3      | 0.205385 |
| MXD1       | 0.205284 |
| CYCSP6     | 0.205281 |
| HMGN1P36   | 0.205194 |
| GIPC3      | 0.204838 |
| MT1E       | 0.204492 |
| GJC2       | 0.204332 |
| PAQR7      | 0.204313 |
| Z74021.1   | 0.204147 |
| TTK        | 0.20385  |
| DDR1       | 0.203765 |
| UBE2E4P    | 0.203758 |
| TNK1       | 0.203753 |
| COL18A1    | 0.20375  |
| RDX        | 0.203478 |
| MPP2       | 0.203371 |
| RAB11FIP5  | 0.203356 |
| PPARD      | 0.203286 |
| RRM2       | 0.203234 |
| SUSD5      | 0.20316  |
| YIPF3      | 0.203149 |
| ARPC1B     | 0.203072 |
| AC073316.2 | 0.202727 |
| PKIA       | 0.202608 |
| AC090515.4 | 0.202536 |

|            |          |
|------------|----------|
| LAMB1      | 0.202391 |
| RPS2P7     | 0.20233  |
| SHMT1      | 0.202309 |
| CA9        | 0.202211 |
| AC009275.1 | 0.20213  |
| TMEM92-AS1 | 0.202103 |
| RPS10P3    | 0.201858 |
| RBBP8NL    | 0.201809 |
| FO393411.1 | 0.201778 |
| DEPDC1     | 0.201769 |
| JPT2       | 0.201604 |
| AP000769.1 | 0.201407 |
| NUP155     | 0.201341 |
| RPL23P8    | 0.201262 |
| FURIN      | 0.201208 |
| AC015922.3 | 0.200842 |
| RPS18P12   | 0.200819 |
| VEGFA      | 0.200811 |
| TOB1       | 0.200759 |
| DSC2       | 0.20068  |
| RNF186     | 0.200502 |
| WIPF3      | 0.200118 |
| BFSP1      | 0.200036 |
| S100A4     | 0.200023 |
| SECISBP2L  | 0.199945 |
| AKR1B1     | 0.199923 |
| RPL15P3    | 0.199847 |
| DRD4       | 0.199786 |
| YJEFN3     | 0.199722 |
| NES        | 0.199426 |
| AL023284.4 | 0.198927 |
| AP1S1      | 0.198878 |
| ZBTB12     | 0.198794 |
| LRRC1      | 0.198227 |
| LINC02688  | 0.19821  |
| KLK8       | 0.198187 |
| MBOAT2     | 0.198113 |
| NPNT       | 0.197792 |
| SCEL       | 0.197781 |
| RPL7AP6    | 0.197775 |
| MST1R      | 0.197688 |
| HAL        | 0.197605 |
| POLD2      | 0.197485 |
| PTHLH      | 0.197392 |
| GAS2L1     | 0.197253 |
| GRAMD2A    | 0.197205 |
| NCAM1      | 0.196894 |
| MIR6835    | 0.196758 |
| DNTTIP1    | 0.196657 |

|            |          |
|------------|----------|
| PORCN      | 0.196589 |
| AL139095.2 | 0.196545 |
| HSPG2      | 0.196482 |
| ALKAL1     | 0.196473 |
| TPD52L2    | 0.196461 |
| TYRO3      | 0.196448 |
| BX322562.1 | 0.196356 |
| RNU6-26P   | 0.196328 |
| CYP3A5     | 0.196144 |
| HMG2N2P41  | 0.195921 |
| KDEL2      | 0.195877 |
| HCFC1R1    | 0.195867 |
| SUSD2      | 0.195867 |
| PDZK1IP1   | 0.195759 |
| SMO        | 0.195754 |
| NAGS       | 0.195591 |
| SLC9A3R2   | 0.195567 |
| PRDX1      | 0.19556  |
| KIF23      | 0.195539 |
| AC016596.2 | 0.195532 |
| MOSPD3     | 0.195512 |
| EFNA4      | 0.195494 |
| TNNI1      | 0.195488 |
| ABTB2      | 0.195219 |
| EIF3B      | 0.194905 |
| MXRA8      | 0.194902 |
| AXL        | 0.194771 |
| OSR2       | 0.194746 |
| HFE        | 0.19473  |
| ALDH3B1    | 0.194322 |
| AVEN       | 0.194319 |
| PLEKHA6    | 0.194278 |
| INTS1      | 0.194191 |
| MEPCE      | 0.194092 |
| SEMA3D     | 0.194057 |
| AC006206.2 | 0.193772 |
| HES4       | 0.193734 |
| RPL4P5     | 0.193538 |
| BX322234.1 | 0.193468 |
| AC008026.1 | 0.19316  |
| TCEA3      | 0.193117 |
| DUSP5      | 0.193003 |
| GCA1       | 0.192918 |
| B4GALNT2   | 0.192869 |
| TXN        | 0.192794 |
| AL590652.1 | 0.192601 |
| HIC2       | 0.192493 |
| TACSTD2    | 0.192486 |
| KIF1C      | 0.192433 |

|            |          |
|------------|----------|
| AC023421.1 | 0.192393 |
| SMAGP      | 0.192387 |
| TICRR      | 0.192215 |
| CXCL3      | 0.192053 |
| HBB        | 0.191965 |
| MXRA7      | 0.191523 |
| RPL7P9     | 0.191381 |
| KNSTRN     | 0.191272 |
| AC026471.3 | 0.191198 |
| AL391427.1 | 0.191179 |
| GATA2-AS1  | 0.191157 |
| AC133528.1 | 0.191145 |
| HSP90AB1   | 0.191121 |
| CLDN1      | 0.19096  |
| LINC01018  | 0.190914 |
| OAF        | 0.190847 |
| CDH2       | 0.19083  |
| KLHL21     | 0.190817 |
| ID4        | 0.190751 |
| GAPDHP35   | 0.190549 |
| KRT8P11    | 0.190518 |
| CHRNA1     | 0.190489 |
| HSPB7      | 0.190471 |
| PDAP1      | 0.190315 |
| LINC00942  | 0.190235 |
| SORD       | 0.190226 |
| MAP3K20    | 0.190202 |
| SMIM1      | 0.190147 |
| LY6D       | 0.190057 |
| SMTN       | 0.189949 |
| PSMD2      | 0.189927 |
| ANKRD9     | 0.189868 |
| TBC1D2     | 0.189764 |
| RPL23AP49  | 0.1896   |
| PERM1      | 0.189275 |
| HMG1P37    | 0.189067 |
| TMED3      | 0.189033 |
| PALM3      | 0.189033 |
| DAP        | 0.189016 |
| HYAL1      | 0.188983 |
| SAMD11     | 0.188616 |
| SPR        | 0.188586 |
| C16orf89   | 0.188577 |
| FOXC1      | 0.188492 |
| FGFBP1     | 0.18844  |
| TMEM35A    | 0.188399 |
| OSBP2      | 0.188308 |
| CCDC85C    | 0.188232 |
| SRD5A3     | 0.188058 |

|            |          |
|------------|----------|
| CHEK1      | 0.188037 |
| SMIM6      | 0.188006 |
| ENTPD8     | 0.188001 |
| AC138392.1 | 0.187761 |
| PPP1R14BP3 | 0.187655 |
| RPL17P50   | 0.18764  |
| UNC5B      | 0.187524 |
| AP1S3      | 0.187512 |
| RPS3AP21   | 0.187307 |
| FAM20C     | 0.187179 |
| TOMM40P4   | 0.187153 |
| AL391056.1 | 0.187123 |
| CDCA4      | 0.187095 |
| TMBIM1     | 0.186773 |
| MPZL2      | 0.186772 |
| PDGFC      | 0.186613 |
| LDHA       | 0.186442 |
| ZNF713     | 0.186383 |
| RASSF7     | 0.186273 |
| AC079140.2 | 0.186165 |
| EIF4G1     | 0.18602  |
| KPNA7      | 0.185768 |
| ETFRF1     | 0.185634 |
| ZNF880     | 0.185582 |
| NYNRIN     | 0.185322 |
| KIAA1549   | 0.184856 |
| PRSS23     | 0.18481  |
| RAB25      | 0.184785 |
| AC093627.4 | 0.184738 |
| EIF4BP6    | 0.184728 |
| ZNF311     | 0.184469 |
| ELOVL4     | 0.184455 |
| LRRC42     | 0.184377 |
| POP7       | 0.184356 |
| UFSP1      | 0.183975 |
| CPXM1      | 0.183701 |
| VASN       | 0.183664 |
| ATP5MC1P4  | 0.183652 |
| PRECSIT    | 0.183524 |
| ACTN4      | 0.183432 |
| PALLD      | 0.183244 |
| LRFN1      | 0.18319  |
| SLC52A3    | 0.183172 |
| GNB2       | 0.183172 |
| APBA2      | 0.183171 |
| PKP3       | 0.183028 |
| SLC45A4    | 0.182781 |
| LGR4       | 0.182684 |
| MYO1G      | 0.182671 |

|            |          |
|------------|----------|
| PRICKLE1   | 0.182576 |
| AEBP1      | 0.18246  |
| PAICS      | 0.182448 |
| CDC42EP2   | 0.182184 |
| TMEM41A    | 0.18214  |
| RPL35P1    | 0.182121 |
| ARHGEF16   | 0.181887 |
| APBB2      | 0.181886 |
| PDE4D      | 0.181785 |
| AC010343.1 | 0.181759 |
| AC135178.6 | 0.181726 |
| ZFPM2      | 0.181681 |
| AL512329.2 | 0.181535 |
| SPTBN2     | 0.181383 |
| AGTRAP     | 0.18121  |
| GPAT2      | 0.181148 |
| LPAR1      | 0.181117 |
| AC144831.1 | 0.181084 |
| ABHD17C    | 0.18098  |
| ATP5F1EP2  | 0.180801 |
| AL606489.1 | 0.18071  |
| YWHAG      | 0.180675 |
| VAV3       | 0.180673 |
| RPL13P12   | 0.180671 |
| NXN        | 0.180606 |
| PLBD1      | 0.180599 |
| ZBED9      | 0.180571 |
| P2RY2      | 0.180504 |
| TPI1       | 0.180449 |
| TSR1       | 0.180381 |
| TPM4       | 0.18038  |
| ACOT13     | 0.180375 |
| EBPL       | 0.18034  |
| GNMT       | 0.180324 |
| CHMP4C     | 0.180274 |
| IDH1       | 0.180147 |
| LINC02593  | 0.180119 |
| SUMF2      | 0.18011  |
| DHRS11     | 0.179936 |
| ID3        | 0.179785 |
| HSD17B2    | 0.179687 |
| FAM86JP    | 0.17967  |
| CKAP4      | 0.179665 |
| DDX10      | 0.179656 |
| AC012073.1 | 0.179575 |
| SNHG18     | 0.179499 |
| MUC20P1    | 0.179444 |
| COL6A2     | 0.179325 |
| MACIR      | 0.179216 |

|            |          |
|------------|----------|
| MKRN2OS    | 0.178982 |
| PTGES3P3   | 0.178814 |
| DENND2A    | 0.178752 |
| AL391001.1 | 0.178645 |
| SOSTDC1    | 0.178546 |
| PNKD       | 0.178539 |
| CLPSL2     | 0.178508 |
| RPL10AP2   | 0.178423 |
| AFAP1L2    | 0.178391 |
| TRIP10     | 0.178317 |
| SMAD3      | 0.178294 |
| STK38L     | 0.17808  |
| FTH1P11    | 0.177976 |
| PSORS1C1   | 0.177953 |
| EPHA10     | 0.177952 |
| ADAP1      | 0.177872 |
| AC000089.1 | 0.177832 |
| RASSF8     | 0.177722 |
| TMSB10P1   | 0.177686 |
| UCHL1      | 0.177483 |
| SLCO2A1    | 0.177339 |
| GOLT1B     | 0.177209 |
| RAB5IF     | 0.177158 |
| MIR4653    | 0.177101 |
| PCDH1      | 0.176839 |
| SHISA4     | 0.17679  |
| CPNE8-AS1  | 0.176725 |
| EEF1B2P3   | 0.176462 |
| ANXA9      | 0.176393 |
| RPS10P2    | 0.17638  |
| IKBIP      | 0.176328 |
| RAP1BL     | 0.176273 |
| SLC39A14   | 0.176204 |
| RAC1P2     | 0.176196 |
| PCOLCE     | 0.176034 |
| LINC02381  | 0.176013 |
| CDC6       | 0.176005 |
| BZW1       | 0.176001 |
| FAM110B    | 0.175879 |
| DPY19L1    | 0.17553  |
| KIF3C      | 0.175402 |
| CHPF       | 0.175147 |
| KRT7-AS    | 0.175077 |
| TWIST1     | 0.174999 |
| RPL24P4    | 0.17496  |
| IRS1       | 0.174899 |
| RAB31      | 0.174778 |
| MAP7       | 0.174693 |
| ITGB3      | 0.174626 |

|            |          |
|------------|----------|
| ACTG2      | 0.174559 |
| PCDHB4     | 0.174474 |
| AC147067.1 | 0.174471 |
| PVR        | 0.174444 |
| ABCB6      | 0.174323 |
| PLOD3      | 0.174322 |
| GLB1L3     | 0.17428  |
| HOXD9      | 0.173915 |
| PCDHAC1    | 0.173908 |
| TMOD3      | 0.173778 |
| ULK1       | 0.173725 |
| MT1M       | 0.173555 |
| YKT6       | 0.173504 |
| DMGDH      | 0.173494 |
| HES1       | 0.173355 |
| AP005233.2 | 0.173269 |
| ERLIN1     | 0.173141 |
| EPHA1      | 0.173111 |
| ADAM17     | 0.173079 |
| DMBX1      | 0.172996 |
| SBSPON     | 0.172792 |
| SLC16A5    | 0.172699 |
| GATA2      | 0.172621 |
| PAFAH1B2   | 0.172617 |
| SPATC1L    | 0.172548 |
| AL365357.1 | 0.172381 |
| DACT1      | 0.172372 |
| EPN2       | 0.172324 |
| AC010503.4 | 0.172211 |
| AC006026.3 | 0.17217  |
| EIF4BP3    | 0.172015 |
| BAG1       | 0.171813 |
| RPS3AP6    | 0.171742 |
| SLC45A3    | 0.171716 |
| MECOM      | 0.171594 |
| N4BP3      | 0.171556 |
| CTTN       | 0.171515 |
| SEC14L2    | 0.171497 |
| PSORS1C3   | 0.171352 |
| BIK        | 0.171193 |
| INTS13     | 0.171173 |
| BUB1B      | 0.171045 |
| ADAMTS9    | 0.171022 |
| CDCA8      | 0.170938 |
| ADGRA3     | 0.17076  |
| ALG3       | 0.170652 |
| ALDH3A2    | 0.170571 |
| RPL7AP11   | 0.170534 |
| PENK       | 0.170447 |



|             |          |
|-------------|----------|
| TMEM79      | 0.170368 |
| TMC7        | 0.170367 |
| ZNHIT6      | 0.170193 |
| CDK2AP1     | 0.170082 |
| NFKBIL1     | 0.170034 |
| PPM1J       | 0.169848 |
| SACS        | 0.169762 |
| AC112220.2  | 0.169678 |
| DNAAF5      | 0.169649 |
| NHLRC1      | 0.169502 |
| LINC02474   | 0.169327 |
| ADAM15      | 0.169308 |
| CHGB        | 0.169256 |
| FHL3        | 0.169094 |
| AC009065.2  | 0.168778 |
| AC110619.1  | 0.168717 |
| SLC12A9-AS1 | 0.16866  |
| ZNF229      | 0.16865  |
| CDC45       | 0.168565 |
| TPRG1-AS1   | 0.168555 |
| SUMO3       | 0.168445 |
| STYK1       | 0.168416 |
| COL3A1      | 0.168336 |
| LGI3        | 0.168333 |
| LY6H        | 0.168266 |
| GPX2        | 0.168238 |
| MRPS35      | 0.168221 |
| ARHGEF5     | 0.16808  |
| RNF26       | 0.168041 |
| P3H3        | 0.167961 |
| GPRIN1      | 0.167956 |
| PTGS1       | 0.16785  |
| JPT1        | 0.167762 |
| IMMP2L      | 0.167747 |
| AL158166.1  | 0.167652 |
| DSTN        | 0.167636 |
| NIPSNAP1    | 0.167583 |
| FRRS1       | 0.167572 |
| H3P47       | 0.167545 |
| AP4M1       | 0.167492 |
| FZD1        | 0.167475 |
| ATAD3C      | 0.167362 |
| PRC1        | 0.167339 |
| TINAG       | 0.167243 |
| RPS2P5      | 0.167137 |
| RPLP0P6     | 0.167075 |
| ZNF217      | 0.166954 |
| UBE2H       | 0.166872 |
| CLSPN       | 0.166822 |

|            |          |
|------------|----------|
| SDC4       | 0.166742 |
| KLF5       | 0.166634 |
| RPL39L     | 0.166568 |
| C1orf122   | 0.166551 |
| FAM177B    | 0.166531 |
| ACTG1      | 0.166498 |
| CHML       | 0.166413 |
| UBTD1      | 0.166386 |
| FLII       | 0.166381 |
| GPATCH4    | 0.166367 |
| MYL9       | 0.166136 |
| CREB5      | 0.166018 |
| SEPTIN10   | 0.165974 |
| CTNNAL1    | 0.165948 |
| AL512353.1 | 0.165908 |
| NDC1       | 0.165781 |
| PDE3A      | 0.16578  |
| SLC2A4RG   | 0.165733 |
| MSANTD3    | 0.165694 |
| HAGLROS    | 0.165447 |
| GPSM1      | 0.165418 |
| LUZP1      | 0.165418 |
| TTYH3      | 0.165366 |
| NELL1      | 0.16532  |
| FAM86EP    | 0.165242 |
| HOXB9      | 0.165235 |
| SRPX2      | 0.165231 |
| CUL7       | 0.16521  |
| AL645608.8 | 0.165087 |
| HACD2      | 0.165086 |
| CTHRC1     | 0.165021 |
| IFRD2      | 0.164991 |
| SLC25A10   | 0.164641 |
| MCM2       | 0.164442 |
| YWHAE      | 0.164384 |
| FABP5      | 0.164267 |
| KIF13A     | 0.164262 |
| FOXO6      | 0.164176 |
| MTMR2      | 0.164137 |
| CLDN7      | 0.163982 |
| CAVIN3     | 0.163955 |
| FAM207A    | 0.163939 |
| ISYNA1     | 0.163793 |
| RPS3AP26   | 0.163738 |
| ADAMTS7    | 0.163734 |
| HDGFP1     | 0.1637   |
| AC018904.1 | 0.163649 |
| FAM110C    | 0.163619 |
| AC013457.1 | 0.163575 |

|            |          |
|------------|----------|
| C2CD4D-AS1 | 0.163571 |
| JUP        | 0.163519 |
| KDF1       | 0.163477 |
| NOL3       | 0.163345 |
| FEZF1      | 0.163316 |
| NRTN       | 0.163283 |
| ZNF697     | 0.163265 |
| BCORL1     | 0.163259 |
| EHMT2      | 0.163197 |
| FAH        | 0.163159 |
| FIP1L1     | 0.163091 |
| C5orf22    | 0.162822 |
| KIAA1217   | 0.162733 |
| AHDC1      | 0.162559 |
| RPS20P14   | 0.16253  |
| VANGL1     | 0.162265 |
| TEAD2      | 0.162186 |
| ASIC3      | 0.162124 |
| DTL        | 0.162038 |
| TENT5A     | 0.161956 |
| CRK        | 0.161666 |
| RPS10P9    | 0.161595 |
| CHST3      | 0.161573 |
| HIF3A      | 0.161547 |
| TAF6       | 0.161526 |
| LYAR       | 0.161516 |
| OPN1SW     | 0.161485 |
| HTRA1      | 0.161283 |
| LINC02471  | 0.161231 |
| PCYT2      | 0.161147 |
| MTHFS      | 0.161144 |
| PRKCA      | 0.161065 |
| CCDC9B     | 0.161056 |
| LINC01843  | 0.160635 |
| CHPT1      | 0.160622 |
| GAREM2     | 0.160592 |
| AC107983.1 | 0.160394 |
| TMEM99     | 0.160282 |
| SLC35A2    | 0.160213 |
| SLC39A10   | 0.160185 |
| ERLIN2     | 0.160163 |
| FAM189B    | 0.160054 |
| AC083900.1 | 0.159995 |
| BCL9       | 0.159975 |
| ME1        | 0.159956 |
| MRPL37     | 0.159951 |
| SLC6A14    | 0.159886 |
| NFYA       | 0.159852 |
| AL031587.5 | 0.159764 |

|            |          |
|------------|----------|
| AFAP1      | 0.159746 |
| PKDCC      | 0.159735 |
| AL136452.1 | 0.159723 |
| KIF14      | 0.159677 |
| LINC02550  | 0.159612 |
| B4GALT1    | 0.159581 |
| QSOX1      | 0.159369 |
| AC092115.3 | 0.159368 |
| CDC42BPB   | 0.159318 |
| RPL23AP65  | 0.159229 |
| EPHB2      | 0.159091 |
| KLRG2      | 0.159017 |
| ERO1A      | 0.158865 |
| TLE2       | 0.158825 |
| PRDX6      | 0.15876  |
| GPR27      | 0.158628 |
| RPSAP7     | 0.158476 |
| PMS2P1     | 0.158408 |
| BCL2L15    | 0.158161 |
| LMTK2      | 0.158114 |
| BIRC5      | 0.158019 |
| SCGB3A2    | 0.157894 |
| DLD        | 0.157892 |
| TUBA1B     | 0.157751 |
| LYPD5      | 0.157713 |
| CLUH       | 0.157664 |
| EIF4A3     | 0.157519 |
| NOB1       | 0.15751  |
| CPB2       | 0.157389 |
| SEMA6C     | 0.156975 |
| TFG        | 0.156938 |
| SLC35G2    | 0.156822 |
| CLSTN1     | 0.156806 |
| SNHG32     | 0.156772 |
| AL049836.1 | 0.156617 |
| NOC2L      | 0.156538 |
| RPL31P17   | 0.156512 |
| BDKRB2     | 0.156417 |
| DNTTIP2    | 0.156342 |
| GSTM3      | 0.156265 |
| LINC02038  | 0.156254 |
| AL662791.1 | 0.156232 |
| PTPN14     | 0.156097 |
| VGLL4      | 0.156091 |
| AMOT       | 0.156025 |
| CPSF4      | 0.156024 |
| ANKS6      | 0.155966 |
| LATS2      | 0.155956 |
| C15orf39   | 0.155784 |

|            |          |
|------------|----------|
| URGCP      | 0.155745 |
| KDM5B      | 0.155717 |
| S100A6     | 0.155591 |
| LINC01376  | 0.155579 |
| GEMIN4     | 0.155552 |
| FAM220A    | 0.155538 |
| C5orf34    | 0.155529 |
| AP001324.1 | 0.155521 |
| GPRC5D-AS1 | 0.155508 |
| PPAT       | 0.155275 |
| TNRC18     | 0.15527  |
| HSD17B1    | 0.155248 |
| SLC27A4    | 0.155003 |
| RPL26P19   | 0.154983 |
| PIEZO1     | 0.154919 |
| MTCH1      | 0.154879 |
| WTIP       | 0.15485  |
| TACC2      | 0.154808 |
| FTH1P7     | 0.154773 |
| SPDYE3     | 0.15473  |
| PRR4       | 0.154635 |
| PCYOX1     | 0.154569 |
| BRIX1      | 0.154513 |
| PPP2R5D    | 0.154453 |
| PRELID1P6  | 0.15441  |
| XRCC2      | 0.154402 |
| DAGLB      | 0.154109 |
| YWHAZP10   | 0.154028 |
| BAG6       | 0.154028 |
| RPS15P4    | 0.154016 |
| KIF20A     | 0.153999 |
| SCCPDH     | 0.153912 |
| CCND1      | 0.153894 |
| SMPDL3B    | 0.153869 |
| POMGNT1    | 0.153826 |
| KRT6B      | 0.153811 |
| ELMO3      | 0.153728 |
| PTER       | 0.153716 |
| TRAF7      | 0.153673 |
| TAF5       | 0.153668 |
| PRRC2A     | 0.153623 |
| ADK        | 0.153592 |
| CHAF1B     | 0.153508 |
| ATAD3A     | 0.153396 |
| RERG       | 0.153287 |
| PLS1       | 0.153267 |
| MEIS3      | 0.153232 |
| AC093297.2 | 0.153163 |
| PLCB3      | 0.15314  |

|            |          |
|------------|----------|
| RPL37      | 0.153106 |
| MAD1L1     | 0.153078 |
| GPN1       | 0.153075 |
| SLC5A6     | 0.153049 |
| AC099336.2 | 0.153034 |
| RNU6-403P  | 0.153004 |
| MRPS17     | 0.152979 |
| RBM8B      | 0.15295  |
| KLHDC3     | 0.152805 |
| KNDC1      | 0.152759 |
| CDKN1A     | 0.152648 |
| CLIP1      | 0.152642 |
| NDFIP2     | 0.152619 |
| PARS2      | 0.152416 |
| CCDC77     | 0.152401 |
| SPATA5L1   | 0.152339 |
| TRIM8      | 0.152257 |
| BAG3       | 0.151874 |
| CPTP       | 0.151799 |
| SRGAP1     | 0.151781 |
| AC091153.1 | 0.151767 |
| BAHCC1     | 0.151745 |
| HDGF       | 0.151716 |
| TTC4       | 0.151562 |
| ZNF135     | 0.151542 |
| P4HA3      | 0.151462 |
| CANT1      | 0.151396 |
| RANP1      | 0.15126  |
| THNSL2     | 0.151146 |
| LPCAT4     | 0.151118 |
| ANO7       | 0.151092 |
| DNAJC2     | 0.151064 |
| TMEM238    | 0.151031 |
| POU6F2-AS2 | 0.151003 |
| PALM       | 0.150964 |
| MRGBP      | 0.150957 |
| PRRX1      | 0.15082  |
| MRPL2      | 0.150815 |
| RAD51      | 0.150806 |
| NCOR2      | 0.150794 |
| EMP1       | 0.150711 |
| MAP1B      | 0.150671 |
| SLC39A7    | 0.150642 |
| ADAMTS3    | 0.150536 |
| GPB1       | 0.15051  |
| VPS37B     | 0.150496 |
| SMAD1      | 0.150255 |
| FOXD1      | 0.150082 |
| BLVRB      | 0.150054 |

|            |          |
|------------|----------|
| RBMS2      | 0.150001 |
| SATB2      | 0.149995 |
| AC107956.1 | 0.149939 |
| AGRP       | 0.149937 |
| NPM1P6     | 0.149783 |
| GRPEL1     | 0.149769 |
| PFN1P1     | 0.149747 |
| ARHGEF17   | 0.149747 |
| FTH1P15    | 0.149732 |
| NUP153     | 0.149683 |
| NID1       | 0.149593 |
| LINC00958  | 0.149335 |
| CHST14     | 0.14918  |
| MAP4K4     | 0.149162 |
| GDF5       | 0.149085 |
| ENO1       | 0.149079 |
| ATP2B4     | 0.149071 |
| SLC22A3    | 0.149035 |
| ECHDC3     | 0.149019 |
| AC026403.1 | 0.149009 |
| POGLUT3    | 0.148951 |
| ABCG2      | 0.148868 |
| HAS2       | 0.14881  |
| TNFRSF21   | 0.14879  |
| FAP        | 0.148776 |
| RPL7AP50   | 0.148748 |
| MIEF2      | 0.14873  |
| SLC12A7    | 0.148656 |
| PJA1       | 0.148612 |
| PDGFD      | 0.148602 |
| RPS2P55    | 0.148563 |
| SLC25A37   | 0.148505 |
| SPRYD7     | 0.148444 |
| SLPI       | 0.14837  |
| NOA1       | 0.148346 |
| GPAT4      | 0.148327 |
| TUBBP1     | 0.148291 |
| DNAJB6P1   | 0.14829  |
| ADGRL1     | 0.1482   |
| LINC01942  | 0.148197 |
| SF3B4      | 0.148083 |
| POLR2A     | 0.147964 |
| NCAPG      | 0.147935 |
| BX679664.1 | 0.147927 |
| AL365205.1 | 0.14784  |
| GLIS2      | 0.147832 |
| LAMP5      | 0.1478   |
| ABCA4      | 0.147691 |
| EIF4BP7    | 0.147533 |

|            |          |
|------------|----------|
| MCFD2      | 0.147514 |
| GALK1      | 0.147504 |
| EPS8       | 0.147451 |
| ALDH1A1    | 0.147404 |
| AC021074.1 | 0.147378 |
| AOC1       | 0.147374 |
| CCDC120    | 0.147349 |
| NME2       | 0.14723  |
| ELK3       | 0.146982 |
| SNORD14E   | 0.146961 |
| FLNA       | 0.146919 |
| THOC3      | 0.146899 |
| B4GALNT4   | 0.146891 |
| TGFB1I1    | 0.146749 |
| SSH3       | 0.146735 |
| METTL26    | 0.146701 |
| AC090498.1 | 0.14668  |
| AC016877.3 | 0.146672 |
| PCCA-DT    | 0.146666 |
| GRHL1      | 0.146498 |
| LINC02542  | 0.146474 |
| SPNS2      | 0.146464 |
| SLC12A8    | 0.14646  |
| MUC16      | 0.146445 |
| CNN2       | 0.146443 |
| AC008771.1 | 0.146327 |
| CIP2A      | 0.146285 |
| TWINK      | 0.146212 |
| GNAI1      | 0.146144 |
| CYP2D6     | 0.146125 |
| EFEMP2     | 0.14602  |
| RARA       | 0.14595  |
| TMC4       | 0.145937 |
| KRT8P45    | 0.145892 |
| BID        | 0.145877 |
| GLT8D2     | 0.145845 |
| AC137932.1 | 0.14583  |
| GGTLC1     | 0.145801 |
| SUN1       | 0.145778 |
| DSE        | 0.145749 |
| CCNB1      | 0.145712 |
| NR2F2      | 0.145711 |
| PGM2L1     | 0.145573 |
| NOX4       | 0.145463 |
| FRG1JP     | 0.145383 |
| EFEMP1     | 0.145348 |
| MIF        | 0.145337 |
| IL1RL2     | 0.145308 |
| ARF4       | 0.145246 |



|            |          |
|------------|----------|
| CCNA2      | 0.145227 |
| FAM83H     | 0.145216 |
| AC087343.1 | 0.145188 |
| RILPL1     | 0.145122 |
| DGAT1      | 0.145071 |
| MED20      | 0.145045 |
| GAPDHP1    | 0.144958 |
| CNN1       | 0.144884 |
| RN7SL689P  | 0.144872 |
| UBE2MP1    | 0.144815 |
| SOX4       | 0.14476  |
| TRGJP2     | 0.144709 |
| SLC22A18   | 0.144681 |
| PSMG3      | 0.144657 |
| MAP2       | 0.144632 |
| ZNF165     | 0.144615 |
| TANC2      | 0.144472 |
| RAB7B      | 0.144445 |
| TMPRSS13   | 0.144376 |
| MCM3       | 0.144112 |
| POLR2J     | 0.144098 |
| CKS1B      | 0.144091 |
| PSMD4      | 0.143988 |
| ARHGEF19   | 0.143981 |
| MAGED1     | 0.143946 |
| NDUFV2P1   | 0.143898 |
| ZNF503     | 0.143723 |
| PDLIM5     | 0.143584 |
| NADK2      | 0.143355 |
| MAP7D2     | 0.143339 |
| AC004890.1 | 0.143336 |
| LARP6      | 0.14319  |
| KRTAP4-1   | 0.143112 |
| KCTD11     | 0.14309  |
| ESYT2      | 0.143044 |
| B4GALT4    | 0.142994 |
| FIGN       | 0.142887 |
| ALDOC      | 0.142808 |
| PON3       | 0.142648 |
| B3GALT6    | 0.142564 |
| SNHG29     | 0.142503 |
| SLC7A1     | 0.142491 |
| RCC1       | 0.142482 |
| IGFL2      | 0.14245  |
| RPUSD1     | 0.142448 |
| AL109914.1 | 0.142363 |
| LINC00467  | 0.142312 |
| EMC1       | 0.142226 |
| NACA3P     | 0.142176 |

|            |          |
|------------|----------|
| RPL13P5    | 0.142081 |
| KCNK3      | 0.142007 |
| FMOD       | 0.141868 |
| GNS        | 0.141651 |
| TENT5B     | 0.141534 |
| EIF5A      | 0.141412 |
| YAP1       | 0.141366 |
| SH3GL1     | 0.141235 |
| H1-0       | 0.141207 |
| STIL       | 0.141175 |
| APLP2      | 0.141126 |
| UCK2       | 0.141019 |
| EDNRA      | 0.140991 |
| RPL26P6    | 0.140881 |
| AQP1       | 0.140871 |
| FNDC10     | 0.1407   |
| PCDHB13    | 0.140685 |
| ADAMTS15   | 0.140684 |
| PIP5KL1    | 0.140556 |
| HOXB-AS3   | 0.140513 |
| CDYL       | 0.14051  |
| LRRC20     | 0.140392 |
| AC012640.2 | 0.140377 |
| SLC16A6    | 0.140368 |
| RNF208     | 0.140367 |
| PTK7       | 0.140275 |
| TSPAN15    | 0.140253 |
| CXCR1      | 0.140242 |
| MSRB3      | 0.140171 |
| RFLNA      | 0.140161 |
| MFAP1      | 0.140154 |
| APLNR      | 0.140132 |
| C11orf95   | 0.140074 |
| ERGIC1     | 0.140043 |
| HAS3       | 0.140021 |
| TMEM87A    | 0.139911 |
| SBDS       | 0.139899 |
| LRRC3      | 0.139818 |
| RPS6KA4    | 0.139808 |
| HAVCR1     | 0.139635 |
| BX679664.3 | 0.139523 |
| HLX        | 0.139437 |
| FOXP4      | 0.139399 |
| SPRY2      | 0.139337 |
| C2CD4D     | 0.139289 |
| FZD2       | 0.139281 |
| SGCD       | 0.139279 |
| AL359091.4 | 0.139228 |
| ABHD2      | 0.139199 |

|             |          |
|-------------|----------|
| ELN         | 0.139177 |
| CPNE8       | 0.139119 |
| H3P16       | 0.139104 |
| AC027307.2  | 0.139085 |
| P4HB        | 0.13904  |
| RBKS        | 0.139007 |
| AC127496.5  | 0.138958 |
| MCM10       | 0.138938 |
| CDC25C      | 0.138885 |
| TMEM120A    | 0.138716 |
| AL161421.1  | 0.138651 |
| FTH1P5      | 0.138537 |
| TMEM14A     | 0.138528 |
| LRIF1       | 0.138502 |
| MRPL33      | 0.138448 |
| CD207       | 0.138361 |
| MATN3       | 0.138276 |
| SRD5A1      | 0.138184 |
| SYNC        | 0.138135 |
| TFR2        | 0.138102 |
| LIMCH1      | 0.1381   |
| CYSTM1      | 0.138045 |
| DNM3        | 0.138036 |
| SEC61G      | 0.137943 |
| METAP1D     | 0.137928 |
| EEF1B2P6    | 0.137906 |
| CHST15      | 0.137879 |
| CNNM4       | 0.137808 |
| PLL         | 0.137803 |
| COA7        | 0.137725 |
| BLACAT1     | 0.13768  |
| CERS2       | 0.137597 |
| ADCY3       | 0.137585 |
| IGSF9       | 0.137478 |
| TICAM1      | 0.137374 |
| CLDN12      | 0.137355 |
| MIR4435-2HG | 0.13734  |
| DFFA        | 0.137302 |
| IL17RC      | 0.137279 |
| SENP2       | 0.137266 |
| CMTM8       | 0.137202 |
| UBE2D3-AS1  | 0.137165 |
| SLC16A13    | 0.137161 |
| HK1         | 0.137111 |
| AC021106.1  | 0.137096 |
| MMACHC      | 0.137074 |
| NET1        | 0.137033 |
| RAC1        | 0.13688  |
| SLC39A1     | 0.136842 |

|            |          |
|------------|----------|
| FADD       | 0.136833 |
| CDCA5      | 0.136804 |
| C1orf56    | 0.136774 |
| PYCR1      | 0.136768 |
| NELFE      | 0.136755 |
| GLOD5      | 0.136755 |
| RNF145     | 0.136677 |
| GNG12      | 0.136479 |
| IRX5       | 0.136429 |
| COMT       | 0.136406 |
| UBE2E3     | 0.13633  |
| CLDN23     | 0.136315 |
| MRPS10     | 0.136289 |
| TBC1D22B   | 0.136111 |
| MYO10      | 0.136097 |
| COPG2      | 0.136039 |
| CKAP2      | 0.135984 |
| AC064799.1 | 0.135894 |
| EEF1A1P11  | 0.135856 |
| TAF13      | 0.135799 |
| FLAD1      | 0.135783 |
| TUBB4A     | 0.135682 |
| MMP3       | 0.135611 |
| SYPL1      | 0.135601 |
| HGSNAT     | 0.135389 |
| RPL22P1    | 0.135341 |
| FA2H       | 0.135319 |
| OSMR-AS1   | 0.135304 |
| MAP4       | 0.135292 |
| RPS15AP12  | 0.135272 |
| AC108463.1 | 0.135235 |
| MEOX2      | 0.135234 |
| GOLM1      | 0.1352   |
| USP5       | 0.135196 |
| HEY2       | 0.135191 |
| SSBP3      | 0.135065 |
| DHFR       | 0.135058 |
| AL162231.2 | 0.135036 |
| STX17-AS1  | 0.134963 |
| RND2       | 0.134937 |
| EEF1A1P6   | 0.134917 |
| GAS2       | 0.134842 |
| AL117327.1 | 0.13467  |
| AL391121.1 | 0.134532 |
| AC018521.5 | 0.13446  |
| AL035411.1 | 0.134434 |
| PON2       | 0.134401 |
| LIMK1      | 0.134379 |
| SLC16A4    | 0.134373 |

|            |          |
|------------|----------|
| ZNF286A    | 0.134343 |
| PKN3       | 0.134287 |
| TMEM132A   | 0.134268 |
| TEDC2      | 0.134263 |
| SPC25      | 0.134197 |
| ABLIM3     | 0.134141 |
| AC090772.3 | 0.134106 |
| ABCB9      | 0.134019 |
| AC005840.1 | 0.133896 |
| AL354714.2 | 0.133879 |
| XAGE2      | 0.133834 |
| TNIP2      | 0.133831 |
| TRIP13     | 0.133811 |
| VPS72      | 0.133784 |
| PCDHB6     | 0.133749 |
| MRPL24     | 0.133742 |
| AC034231.1 | 0.133708 |
| PSMC2P1    | 0.133679 |
| CCT3       | 0.133645 |
| PLXNA1     | 0.133597 |
| OCIAD2     | 0.133514 |
| ICAM5      | 0.133503 |
| MRPL14     | 0.133496 |
| SULF1      | 0.133451 |
| CDH11      | 0.133439 |
| FGGY       | 0.133364 |
| RRP12      | 0.133356 |
| PELO       | 0.133347 |
| PLPPR1     | 0.13333  |
| CLCN3      | 0.133308 |
| EBNA1BP2   | 0.133241 |
| SMIM24     | 0.133227 |
| POGLUT2    | 0.133201 |
| VDAC2      | 0.133196 |
| LRRC15     | 0.133164 |
| B3GALNT1   | 0.133031 |
| STUB1      | 0.133022 |
| AL138760.1 | 0.132989 |
| C3orf86    | 0.13298  |
| PFDN2      | 0.13298  |
| NCAPG2     | 0.132974 |
| AL355796.1 | 0.13294  |
| LINC01977  | 0.132937 |
| USP46      | 0.13292  |
| PHKA1      | 0.132865 |
| BRF2       | 0.132626 |
| IDUA       | 0.132598 |
| ZNF503-AS2 | 0.132582 |
| PEX11A     | 0.13256  |

|            |          |
|------------|----------|
| TM7SF3     | 0.132506 |
| CARD6      | 0.132341 |
| ZFYVE9     | 0.132286 |
| METRNL     | 0.132285 |
| MSN        | 0.132259 |
| CACNA1H    | 0.132256 |
| NFIC       | 0.132221 |
| TIPARP     | 0.132218 |
| HJURP      | 0.132211 |
| ADIPOR2    | 0.132116 |
| SPTSSB     | 0.13211  |
| PAX8-AS1   | 0.132101 |
| SERTAD4    | 0.132089 |
| THEM4      | 0.132057 |
| PANX1      | 0.131992 |
| POLR1F     | 0.131978 |
| JMJD8      | 0.13196  |
| RANBP1     | 0.131949 |
| SEZ6L2     | 0.131882 |
| AL355802.1 | 0.131846 |
| ASAH2B     | 0.131835 |
| LIMA1      | 0.131822 |
| CCL26      | 0.131773 |
| HNF1B      | 0.131742 |
| NPW        | 0.131559 |
| DOCK7      | 0.131547 |
| CTNNA1     | 0.131546 |
| RPLP0P2    | 0.131515 |
| CDT1       | 0.131512 |
| WASL       | 0.131475 |
| ARMC10     | 0.131448 |
| PLK1       | 0.131438 |
| AC244517.7 | 0.131426 |
| ALDH18A1   | 0.131358 |
| XPO5       | 0.131351 |
| LY6K       | 0.131151 |
| ALDH1B1    | 0.131144 |
| LRRC59     | 0.131062 |
| ARHGAP28   | 0.131008 |
| NOCT       | 0.131008 |
| MDH2       | 0.130993 |
| RIT1       | 0.130987 |
| SPAG5      | 0.130941 |
| SPRED2     | 0.130886 |
| NECTIN4    | 0.130872 |
| PLEKHA8P1  | 0.130854 |
| POLH-AS1   | 0.130821 |
| IMPDH2     | 0.13082  |
| RNF2       | 0.130747 |

|            |          |
|------------|----------|
| EREG       | 0.130746 |
| ACTA2      | 0.130709 |
| GTSE1      | 0.130688 |
| AC145207.8 | 0.130665 |
| LAMB2      | 0.130601 |
| MECR       | 0.13057  |
| PUS7       | 0.130386 |
| LRRN2      | 0.130331 |
| FRMD6      | 0.130189 |
| CTBP2      | 0.130157 |
| ESPL1      | 0.130059 |
| SERPINB1   | 0.130004 |
| CUX1       | 0.129977 |
| IL23A      | 0.129949 |
| HNRNPKP1   | 0.12993  |
| CARNS1     | 0.129895 |
| AL590682.1 | 0.129837 |
| MIR4737    | 0.129633 |
| VCAN       | 0.129617 |
| AC010735.2 | 0.129607 |
| ITPRID2    | 0.129552 |
| RAB40C     | 0.129515 |
| MRPS34     | 0.129405 |
| ZNF687     | 0.129338 |
| TCOF1      | 0.129183 |
| CLIC4      | 0.129139 |
| SFTPB      | 0.12909  |
| TUBG1      | 0.129076 |
| EIF4H      | 0.129075 |
| AC112491.1 | 0.129045 |
| AL049873.1 | 0.128968 |
| TGIF1      | 0.128938 |
| TMEM35B    | 0.1289   |
| NBDY       | 0.128877 |
| FMN1       | 0.128764 |
| DHFRP1     | 0.128747 |
| NUDCD3     | 0.128734 |
| ST3GAL3    | 0.128572 |
| CDC25A     | 0.128516 |
| YWHAZP5    | 0.128498 |
| RPL24P2    | 0.128496 |
| SGCB       | 0.128439 |
| CKAP2L     | 0.128417 |
| LTBP3      | 0.128385 |
| SF3B6      | 0.128377 |
| NIPA1      | 0.128343 |
| LINC02772  | 0.128337 |
| POLR1C     | 0.128164 |
| PLXNB2     | 0.128154 |

|            |          |
|------------|----------|
| SNRPEP4    | 0.128131 |
| RHBDL1     | 0.128046 |
| NOL4L      | 0.127972 |
| AIFM2      | 0.127963 |
| TMEM240    | 0.127953 |
| NME1-NME2  | 0.12791  |
| H2BC12     | 0.1279   |
| HGS        | 0.127805 |
| FUT3       | 0.127733 |
| MRPL9      | 0.12763  |
| GNA12      | 0.127544 |
| ANGPTL2    | 0.127527 |
| STRAP      | 0.12744  |
| DSP        | 0.127352 |
| AC005034.3 | 0.127344 |
| PPME1      | 0.127339 |
| FTH1P20    | 0.127318 |
| MRPS30     | 0.127301 |
| AGFG1      | 0.127227 |
| PPIC       | 0.12722  |
| LSM1       | 0.127072 |
| NECTIN3    | 0.127003 |
| GABRE      | 0.126997 |
| GABARAPL1  | 0.126942 |
| SMS        | 0.126844 |
| UBAP1      | 0.126729 |
| KPNA2      | 0.12663  |
| EIF4HP1    | 0.126587 |
| ZNHIT1     | 0.126582 |
| ECI1       | 0.126559 |
| HOXB7      | 0.126435 |
| AZGP1      | 0.126357 |
| CEP170B    | 0.126284 |
| AC138207.2 | 0.12627  |
| RPL24P8    | 0.126187 |
| PTPN21     | 0.126147 |
| ZCRB1      | 0.126146 |
| TSSK5P     | 0.126123 |
| AC068305.2 | 0.126096 |
| RPS3AP47   | 0.126076 |
| IGSF8      | 0.126033 |
| MMP28      | 0.126023 |
| TARS2      | 0.125942 |
| CXXC4      | 0.125927 |
| VSIG10     | 0.125884 |
| PAK4       | 0.125849 |
| PTP4A1     | 0.125818 |
| AL355472.1 | 0.125785 |
| CRKL       | 0.125674 |



|            |          |
|------------|----------|
| SSR4P1     | 0.125669 |
| NCSTN      | 0.125603 |
| KCNJ8      | 0.125595 |
| ARMC7      | 0.125584 |
| SMN2       | 0.125552 |
| PICART1    | 0.125542 |
| TVP23B     | 0.125409 |
| PMAIP1     | 0.125276 |
| IRF6       | 0.125244 |
| ALKBH4     | 0.125207 |
| AP2B1      | 0.125207 |
| CRLF1      | 0.125188 |
| B3GNT5     | 0.125181 |
| AMN1       | 0.125116 |
| ZNF711     | 0.125023 |
| TCF7L2     | 0.12498  |
| WNT5B      | 0.124968 |
| BRI3       | 0.124919 |
| CYS1       | 0.124869 |
| TRAP1      | 0.12483  |
| PCBP2P2    | 0.124782 |
| CD9        | 0.12478  |
| CAD        | 0.124745 |
| TACC3      | 0.124724 |
| NUDT16L2P  | 0.124708 |
| PPIAP11    | 0.124659 |
| ZNF281     | 0.124647 |
| MYCN       | 0.124618 |
| CCN3       | 0.124581 |
| MYADM      | 0.12451  |
| ALDH5A1    | 0.124431 |
| AC010789.1 | 0.124409 |
| ERCC6L     | 0.124398 |
| ENC1       | 0.124393 |
| GNL1       | 0.124354 |
| ATP5MF     | 0.124347 |
| LMNB2      | 0.124341 |
| ALDH7A1    | 0.124335 |
| PEG10      | 0.124299 |
| DDAH2      | 0.124298 |
| AC087645.2 | 0.124263 |
| RCN2       | 0.124215 |
| SEC23A     | 0.124189 |
| FAM162A    | 0.124123 |
| FBN1       | 0.124071 |
| SNHG5      | 0.124055 |
| AATF       | 0.124029 |
| CHCHD2     | 0.123962 |
| GTF2IRD1   | 0.123938 |

|            |          |
|------------|----------|
| FKBPL      | 0.123896 |
| C9orf64    | 0.123874 |
| UBE2C      | 0.123848 |
| DGCR5      | 0.123739 |
| ZPR1       | 0.123673 |
| DDX56      | 0.12367  |
| TNFRSF11B  | 0.123664 |
| MMP24      | 0.123663 |
| KCTD21     | 0.123629 |
| LZTS2      | 0.123614 |
| ITGA10     | 0.12359  |
| BCL10      | 0.123579 |
| HNRNPA1P48 | 0.123553 |
| TNNI3      | 0.12353  |
| SRPK1      | 0.123503 |
| FIS1       | 0.123469 |
| AFAP1-AS1  | 0.12339  |
| TMEM105    | 0.12326  |
| LINC01836  | 0.1232   |
| SPSB2      | 0.123152 |
| MIR663AHG  | 0.122973 |
| AL031729.1 | 0.122961 |
| PAWR       | 0.122918 |
| PELP1      | 0.122828 |
| AC107294.3 | 0.122803 |
| AC127521.1 | 0.122798 |
| GPT        | 0.122773 |
| AL158071.2 | 0.122772 |
| CYTOR      | 0.12268  |
| TRIB3      | 0.122639 |
| GRAMD2B    | 0.12255  |
| CACNB3     | 0.122545 |
| PRSS16     | 0.122512 |
| FN1        | 0.122485 |
| SAMD4B     | 0.122437 |
| AREG       | 0.122365 |
| SNX9       | 0.122358 |
| FAM83D     | 0.122303 |
| STK38      | 0.122235 |
| MIS18A     | 0.122172 |
| GSTP1      | 0.122117 |
| YARS2      | 0.122082 |
| BCAM       | 0.122019 |
| PAGE5      | 0.122017 |
| MICALL1    | 0.122    |
| NDC80      | 0.121943 |
| CRIP2      | 0.121816 |
| RPL21P16   | 0.121784 |
| RITA1      | 0.121762 |

|             |          |
|-------------|----------|
| ANTXR2      | 0.121749 |
| SERPINA1    | 0.121722 |
| RCN1        | 0.121695 |
| PIGS        | 0.121663 |
| AC245033.3  | 0.121636 |
| CYB5D2      | 0.121498 |
| NAA38       | 0.12146  |
| EXOSC10-AS1 | 0.121409 |
| PTMAP2      | 0.121379 |
| LETM1       | 0.121375 |
| TBXA2R      | 0.121353 |
| OXTR        | 0.121334 |
| DUSP14      | 0.121228 |
| MYB         | 0.121154 |
| RCN1P2      | 0.121153 |
| SGCG        | 0.121097 |
| ARCN1       | 0.121073 |
| KCNK1       | 0.121039 |
| OTUD7B      | 0.121028 |
| RFC3        | 0.121018 |
| C3orf18     | 0.120994 |
| SCNN1A      | 0.120944 |
| MYH10       | 0.120942 |
| USP1        | 0.120911 |
| SLC48A1     | 0.120829 |
| NLE1        | 0.120798 |
| ADORA2B     | 0.120782 |
| RPS13P2     | 0.120759 |
| BAG4        | 0.120758 |
| EIF6        | 0.120749 |
| CRTAC1      | 0.120707 |
| RSPO2       | 0.120705 |
| ZBTB4       | 0.120602 |
| H4C9        | 0.120541 |
| RTL10       | 0.120506 |
| ACHE        | 0.120461 |
| EPB41L1     | 0.120438 |
| SOX13       | 0.120346 |
| LINC01291   | 0.120278 |
| MRM2        | 0.120256 |
| HENMT1      | 0.120255 |
| TRIM11      | 0.120248 |
| PLIN2       | 0.120245 |
| TMEM106C    | 0.120239 |
| NUFIP1      | 0.120198 |
| UNC45A      | 0.120197 |
| TLCD3A      | 0.120191 |
| E2F8        | 0.120106 |
| DAPK1       | 0.120064 |

|            |          |
|------------|----------|
| HMGCS1     | 0.120052 |
| HOMER3     | 0.120024 |
| NTMT1      | 0.119971 |
| BX248409.1 | 0.119931 |
| RRP36      | 0.119849 |
| STARD4-AS1 | 0.119845 |
| C11orf24   | 0.119813 |
| ADGRF5     | 0.119812 |
| CYB5R3     | 0.119802 |
| ROR1       | 0.119786 |
| AC010332.1 | 0.119738 |
| AC018647.2 | 0.119712 |
| AGAP2-AS1  | 0.119689 |
| AL928654.4 | 0.119633 |
| CDK5RAP2   | 0.119586 |
| AP3S1      | 0.119586 |
| AC018553.1 | 0.11952  |
| ECE2       | 0.119514 |
| PRR13P5    | 0.119505 |
| ALYREF     | 0.11939  |
| CAMSAP2    | 0.119331 |
| TPMT       | 0.119323 |
| SLC2A12    | 0.119308 |
| RALA       | 0.119282 |
| HILPDA     | 0.119208 |
| PHF23      | 0.119192 |
| ST14       | 0.119166 |
| SOX12      | 0.119165 |
| CD55       | 0.119155 |
| REXO2      | 0.11912  |
| VSNL1      | 0.118986 |
| TIMP4      | 0.118955 |
| MPRIP      | 0.118911 |
| DVL2       | 0.11891  |
| CYP2C18    | 0.118886 |
| ABCF1      | 0.11882  |
| HTATIP2    | 0.118759 |
| FAM86C1P   | 0.118716 |
| AC243964.4 | 0.118666 |
| USP22      | 0.118635 |
| PNPLA2     | 0.118547 |
| CSE1L      | 0.118533 |
| SGO1       | 0.118377 |
| CYB5R1     | 0.118359 |
| VPS52      | 0.118271 |
| KIF11      | 0.118218 |
| BUD31      | 0.118174 |
| DDX54      | 0.118165 |
| CALD1      | 0.11812  |

|             |          |
|-------------|----------|
| MYG1        | 0.118112 |
| PHLDA1      | 0.118094 |
| BOK         | 0.11805  |
| BEX3        | 0.117965 |
| PPP1R3F     | 0.117964 |
| TOMM34      | 0.117949 |
| AC114488.1  | 0.117805 |
| BRPF3       | 0.117757 |
| CD59        | 0.117755 |
| TBKBP1      | 0.117728 |
| EIF4A1P10   | 0.117659 |
| NUSAP1      | 0.117656 |
| PON1        | 0.117647 |
| PBX1        | 0.117637 |
| SPATS2L     | 0.117583 |
| SLC44A3-AS1 | 0.117557 |
| MSC-AS1     | 0.117545 |
| COPZ1       | 0.117532 |
| RNPEP       | 0.117524 |
| PDE4A       | 0.117455 |
| YWHAZP2     | 0.117448 |
| PPM1G       | 0.117433 |
| GGCT        | 0.117247 |
| ACACA       | 0.117215 |
| AL589880.1  | 0.117135 |
| FZD7        | 0.11712  |
| AC115223.1  | 0.117104 |
| TMEM167A    | 0.117104 |
| RPL23AP74   | 0.1171   |
| MCM4        | 0.117062 |
| DSTNP2      | 0.117033 |
| PLEKHH3     | 0.116859 |
| RPS8        | 0.116765 |
| COLGALT1    | 0.116755 |
| EXTL3       | 0.116674 |
| AC078817.1  | 0.116643 |
| MT1XP1      | 0.116633 |
| AC097658.1  | 0.116627 |
| LINC00997   | 0.116509 |
| FBXL7       | 0.116501 |
| EVC2        | 0.116385 |
| SRP72       | 0.116377 |
| NKAIN4      | 0.116367 |
| RPL7L1      | 0.116362 |
| MIR210HG    | 0.116344 |
| NSUN2       | 0.116332 |
| PGAM1       | 0.116172 |
| COX6A1P2    | 0.116155 |
| IRS2        | 0.116149 |

|             |          |
|-------------|----------|
| FTH1P10     | 0.116145 |
| DCTN1       | 0.11608  |
| EIF4EBP1    | 0.116049 |
| ICMT        | 0.115996 |
| ZFYVE19     | 0.115961 |
| MESD        | 0.115946 |
| C8orf34-AS1 | 0.115914 |
| SFTA1P      | 0.115881 |
| DPH2        | 0.115832 |
| LINC00205   | 0.115826 |
| ZNF528-AS1  | 0.11582  |
| AC025449.1  | 0.115804 |
| AGBL5       | 0.115775 |
| PDE4C       | 0.115716 |
| AL451085.2  | 0.115608 |
| DHCR7       | 0.115597 |
| CIB2        | 0.115597 |
| DKK3        | 0.115473 |
| PTGES3      | 0.115463 |
| LINC02014   | 0.115431 |
| MRPS18B     | 0.1154   |
| ZC3H12A     | 0.115382 |
| RPS6KA6     | 0.115316 |
| VPS26A      | 0.11529  |
| TBC1D30     | 0.115288 |
| SIGMAR1     | 0.115285 |
| CLDN4       | 0.115273 |
| TAF1A-AS1   | 0.115243 |
| RAB10       | 0.115214 |
| MED21       | 0.115178 |
| TRIM36      | 0.11499  |
| AP000759.1  | 0.114917 |
| FXR1        | 0.114858 |
| MORF4L1P1   | 0.11483  |
| AC145207.5  | 0.114808 |
| RPL3P2      | 0.114773 |
| RNA5SP18    | 0.11472  |
| AC098583.1  | 0.114708 |
| TMEM102     | 0.114698 |
| SPINT2      | 0.114584 |
| ANKLE2      | 0.114564 |
| TTC23       | 0.114558 |
| RPL14       | 0.114511 |
| TESC        | 0.114429 |
| ERI3        | 0.11442  |
| ARSD        | 0.114419 |
| AL358472.3  | 0.114385 |
| EEF1A1P12   | 0.114286 |
| RBPMS-AS1   | 0.114251 |

|            |          |
|------------|----------|
| UTP11      | 0.114215 |
| SNAPC2     | 0.114181 |
| NETO2      | 0.114117 |
| TSPAN3     | 0.114102 |
| TP53I3     | 0.11401  |
| ALS2CL     | 0.113952 |
| PUSL1      | 0.113917 |
| AKR1C3     | 0.113872 |
| DUS4L      | 0.113849 |
| RPA1       | 0.113822 |
| GAS5       | 0.113819 |
| EIF3J      | 0.113809 |
| CXCL16     | 0.11377  |
| PIGT       | 0.113723 |
| ELOB       | 0.113669 |
| NELFA      | 0.113593 |
| PHC2       | 0.113574 |
| KLC4       | 0.113526 |
| AC107075.1 | 0.113521 |
| MYBBP1A    | 0.113442 |
| B4GALT5    | 0.113424 |
| RBFOX2     | 0.113384 |
| PYGO2      | 0.11333  |
| NOS1AP     | 0.113248 |
| CCDC85B    | 0.113242 |
| AC007406.3 | 0.113231 |
| PLA2G1B    | 0.113195 |
| LINC02608  | 0.113149 |
| SLC25A1    | 0.113055 |
| PPP1R1B    | 0.113043 |
| RASA4CP    | 0.113016 |
| DDX1       | 0.112941 |
| NCAPD2     | 0.112917 |
| NEO1       | 0.112898 |
| MAEA       | 0.112854 |
| LINC00578  | 0.112842 |
| ECE1       | 0.112799 |
| UMPS       | 0.112799 |
| VAR52      | 0.11268  |
| DDX21      | 0.112658 |
| CENPQ      | 0.112576 |
| ZFPL1      | 0.112506 |
| SCAMP3     | 0.112365 |
| KALRN      | 0.112365 |
| TNC        | 0.11228  |
| LINC01521  | 0.112213 |
| HOMER2     | 0.112176 |
| ARRDC3     | 0.112174 |
| AC136632.1 | 0.11217  |

|            |          |
|------------|----------|
| RXRA       | 0.112134 |
| SUMF1      | 0.112128 |
| UHRF1      | 0.112124 |
| TMEM59     | 0.111929 |
| AC009245.1 | 0.111911 |
| LINC02575  | 0.111874 |
| WDR3       | 0.111836 |
| NOLC1      | 0.111804 |
| TCTN3      | 0.111671 |
| CDC42EP3   | 0.111668 |
| ERCC2      | 0.111639 |
| AC026401.3 | 0.111567 |
| TNFAIP1    | 0.111529 |
| TSR3       | 0.111509 |
| QPRT       | 0.111443 |
| AC079140.3 | 0.111421 |
| ATIC       | 0.111388 |
| SMIM13     | 0.111384 |
| AC131235.1 | 0.111346 |
| RAB1B      | 0.111342 |
| BSG        | 0.11134  |
| CAPN1      | 0.111195 |
| GTF3C2     | 0.111127 |
| NPTN       | 0.111093 |
| ARF3       | 0.111083 |
| RAB11A     | 0.11107  |
| PLCD1      | 0.111054 |
| MAPK6      | 0.111048 |
| SRP68      | 0.111035 |
| MRPS18A    | 0.111014 |
| ZFAND3     | 0.110881 |
| XRCC4      | 0.110824 |
| PXMP2      | 0.110805 |
| CLIP2      | 0.110786 |
| TTC23L-AS1 | 0.110733 |
| PMPCB      | 0.110719 |
| RASA1      | 0.110695 |
| GOLPH3L    | 0.11067  |
| RTL6       | 0.110662 |
| TRAM2-AS1  | 0.110651 |
| DERA       | 0.110523 |
| PPP1R35    | 0.110511 |
| RPL7AP66   | 0.110491 |
| C7orf50    | 0.11042  |
| TYMS       | 0.110363 |
| RXYLT1     | 0.110231 |
| ZNF425     | 0.110153 |
| UBAP2L     | 0.110148 |
| RPL7P23    | 0.110054 |



|            |          |
|------------|----------|
| CENPX      | 0.110023 |
| CTSH       | 0.110022 |
| THBD       | 0.109919 |
| GNA15      | 0.109916 |
| TCFL5      | 0.109886 |
| CLIC1      | 0.109836 |
| RPL13AP5   | 0.109809 |
| HRCT1      | 0.109803 |
| WDR43      | 0.109801 |
| UACA       | 0.10976  |
| BARX1      | 0.109727 |
| SH3YL1     | 0.109719 |
| AL355802.3 | 0.109711 |
| TRIM28     | 0.109705 |
| SDHA       | 0.109638 |
| MZT2A      | 0.109565 |
| RAB38      | 0.109524 |
| H2BC4      | 0.109455 |
| ZNRD2      | 0.109438 |
| UBQLN4     | 0.109424 |
| EPS8L2     | 0.109311 |
| ANO10      | 0.109308 |
| BAHD1      | 0.109283 |
| WIP1       | 0.109236 |
| AKIRIN1    | 0.109185 |
| NME3       | 0.109093 |
| CTDSPL     | 0.109093 |
| SLMAP      | 0.10909  |
| ADORA1     | 0.109087 |
| HMBS       | 0.108994 |
| CGN        | 0.108969 |
| PSMD11     | 0.10893  |
| MFF        | 0.10888  |
| AC011497.2 | 0.108853 |
| PTCD1      | 0.108771 |
| CTSL       | 0.108767 |
| ATPCKMT    | 0.1087   |
| HMG20B     | 0.108699 |
| RAP2B      | 0.108601 |
| SHC3       | 0.108582 |
| RPS27AP16  | 0.108574 |
| EXT1       | 0.108558 |
| NCLN       | 0.108531 |
| SNRPC      | 0.108446 |
| SHF        | 0.108391 |
| TST        | 0.108385 |
| SVIL       | 0.108362 |
| NOL11      | 0.108342 |
| ADRA2C     | 0.108286 |

|             |          |
|-------------|----------|
| TMEM191A    | 0.108274 |
| TMEM184A    | 0.108255 |
| TMEM69      | 0.108247 |
| AC132219.2  | 0.108236 |
| IPPK        | 0.108195 |
| PINK1       | 0.108159 |
| CCNJL       | 0.108149 |
| NDUFS5      | 0.108082 |
| UBE2S       | 0.108075 |
| MEX3D       | 0.107934 |
| MRPL12      | 0.107898 |
| PKMYT1      | 0.107825 |
| MAST2       | 0.107809 |
| AC007683.1  | 0.107782 |
| CNN3        | 0.107769 |
| EI24        | 0.107761 |
| MON1A       | 0.107714 |
| RPL5P34     | 0.107652 |
| CDK14       | 0.107604 |
| TPT1P6      | 0.107558 |
| SLC25A13    | 0.107521 |
| CTF1        | 0.107428 |
| ADAM8       | 0.107374 |
| JCAD        | 0.107338 |
| LAMTOR2     | 0.107244 |
| GCNT2       | 0.107156 |
| VASP        | 0.107133 |
| CD36        | 0.107114 |
| FAM222B     | 0.107043 |
| COPS2       | 0.107035 |
| TMEM254-AS1 | 0.106973 |
| SLC29A1     | 0.106931 |
| ZBTB42      | 0.106872 |
| SEC14L6     | 0.106867 |
| TESMIN      | 0.106859 |
| CENPA       | 0.106852 |
| TRIM45      | 0.106764 |
| CENPO       | 0.106685 |
| CCT4        | 0.1066   |
| MANBAL      | 0.106582 |
| ENTPD7      | 0.106569 |
| DHX33       | 0.106561 |
| GART        | 0.106521 |
| FAM3C2P     | 0.106512 |
| KRT10       | 0.106467 |
| SMG5        | 0.10641  |
| PIMREG      | 0.106403 |
| HNRNPUP1    | 0.106384 |
| CKB         | 0.106317 |

|            |          |
|------------|----------|
| EXOC6B     | 0.106247 |
| BPGM       | 0.106244 |
| SLC1A1     | 0.106208 |
| CCDC51     | 0.106167 |
| DROSHA     | 0.10616  |
| PMVK       | 0.106096 |
| BPIFA2     | 0.106094 |
| MAD2L2     | 0.106057 |
| XRCC6      | 0.106029 |
| CCDC86     | 0.106008 |
| DUSP6      | 0.10596  |
| SEC22B     | 0.105926 |
| OGFOD3     | 0.105908 |
| TMEM9      | 0.105894 |
| ATG9A      | 0.105889 |
| LRRC41     | 0.105868 |
| RNF5       | 0.105866 |
| PFN2       | 0.105837 |
| BMP2       | 0.105808 |
| PIGV       | 0.105789 |
| GCN1       | 0.105762 |
| MRPS27     | 0.105566 |
| SERBP1     | 0.105566 |
| PPIAP22    | 0.105561 |
| NRBP1      | 0.105527 |
| AL844908.1 | 0.105407 |
| FSTL4      | 0.105346 |
| CARD10     | 0.105329 |
| LYRM4      | 0.10532  |
| METTL2B    | 0.105287 |
| CCDC34     | 0.105237 |
| C4orf48    | 0.105118 |
| GLMP       | 0.105113 |
| RPS23P8    | 0.105078 |
| GAPLINC    | 0.105073 |
| LRRN1      | 0.105039 |
| F5         | 0.105013 |
| NLGN2      | 0.104983 |
| ANP32A     | 0.104968 |
| TIPIN      | 0.104955 |
| TMEM14C    | 0.104934 |
| ATP2B1     | 0.104932 |
| MNT        | 0.104901 |
| E2F3       | 0.104895 |
| CSRP1      | 0.104814 |
| MAP7D1     | 0.104694 |
| ZC3HC1     | 0.104541 |
| FXR2       | 0.104534 |
| RPL35P2    | 0.104511 |

|             |          |
|-------------|----------|
| TMEM245     | 0.104507 |
| GMNN        | 0.104501 |
| WDR46       | 0.104397 |
| PDXK        | 0.104375 |
| TOM1L1      | 0.104369 |
| DOK7        | 0.104339 |
| UBE2K       | 0.104257 |
| AP3S2       | 0.10425  |
| FAM155B     | 0.104217 |
| IMP4        | 0.104203 |
| MMD         | 0.104181 |
| POFUT1      | 0.104162 |
| AC027309.2  | 0.104144 |
| PRPF8       | 0.104125 |
| FAM90A1     | 0.104111 |
| AL117328.1  | 0.104103 |
| TRAF4       | 0.104039 |
| RCE1        | 0.104037 |
| MRPS2       | 0.103937 |
| PRELID1P1   | 0.103922 |
| ATP5MC2     | 0.103914 |
| PSKH1       | 0.103829 |
| PPP1R11     | 0.103769 |
| PHF14       | 0.103765 |
| MALL        | 0.103714 |
| PIP5K1A     | 0.103689 |
| CDC42BPG    | 0.10368  |
| AC034102.1  | 0.103645 |
| RPS4Y1      | 0.103622 |
| RGL2        | 0.103502 |
| ZNF268      | 0.103489 |
| CNKSR1      | 0.103478 |
| CAMK2G      | 0.10344  |
| MUC1        | 0.103402 |
| POSTN       | 0.103349 |
| VAMP3       | 0.103326 |
| RPL29       | 0.103264 |
| TMBIM6      | 0.10312  |
| FKBP9       | 0.103117 |
| DMKN        | 0.103113 |
| MAP3K14-AS1 | 0.103111 |
| CXXC5       | 0.103099 |
| SPTLC3      | 0.103057 |
| NR2F6       | 0.103048 |
| ATF1        | 0.102965 |
| TAF12       | 0.102901 |
| ZNF598      | 0.102889 |
| DLGAP1-AS1  | 0.102834 |
| SNHG19      | 0.102832 |

|            |          |
|------------|----------|
| RNF11      | 0.10282  |
| MAD2L1BP   | 0.102728 |
| LDHAP4     | 0.102719 |
| ELOVL1     | 0.102709 |
| AL354920.1 | 0.102707 |
| PIK3CD-AS2 | 0.102682 |
| AP001542.3 | 0.102682 |
| MALSU1     | 0.102655 |
| PRKCI      | 0.102591 |
| NEDD4L     | 0.102545 |
| GLS        | 0.102539 |
| P3H1       | 0.102407 |
| PTPRG      | 0.102209 |
| TRIM4      | 0.102163 |
| EML2       | 0.102086 |
| EPN1       | 0.102039 |
| MASTL      | 0.101999 |
| PCDHB14    | 0.101928 |
| IRAK1      | 0.101928 |
| TEAD1      | 0.101846 |
| BTF3       | 0.101804 |
| WWC2       | 0.101801 |
| NPLOC4     | 0.101796 |
| TAGLN2P1   | 0.101749 |
| PTMAP4     | 0.101708 |
| OSBPL9     | 0.101697 |
| ZC3HAV1L   | 0.101685 |
| TSPAN9     | 0.101675 |
| BTF3L4P2   | 0.101671 |
| CEACAM19   | 0.101638 |
| SWI5       | 0.101618 |
| CCDC149    | 0.101592 |
| CDC5L      | 0.101551 |
| S100A13    | 0.101509 |
| MAN2B2     | 0.101458 |
| KCTD14     | 0.101457 |
| FAM3C      | 0.101424 |
| RSL1D1     | 0.101413 |
| ABL1       | 0.101399 |
| TSC22D4    | 0.101396 |
| PLA2G12A   | 0.101328 |
| AL713965.1 | 0.101241 |
| CDK2       | 0.101235 |
| NMD3       | 0.101158 |
| PSMD12     | 0.101134 |
| CSNK1E     | 0.101128 |
| C11orf68   | 0.101106 |
| COPB2      | 0.100945 |
| TNS2       | 0.100905 |

|            |          |
|------------|----------|
| LASP1      | 0.100878 |
| ABHD4      | 0.100704 |
| LINC01589  | 0.100639 |
| MACROH2A2  | 0.100629 |
| F12        | 0.100589 |
| PCDH12     | 0.100582 |
| MYL6B      | 0.10056  |
| KLF11      | 0.100448 |
| BRAT1      | 0.100444 |
| MFSD10     | 0.100391 |
| PSMC2      | 0.100384 |
| MRPL3      | 0.100357 |
| AGPAT1     | 0.100327 |
| ARHGEF34P  | 0.100277 |
| SLC44A2    | 0.100243 |
| PRRG1      | 0.100228 |
| FAF2       | 0.100228 |
| AC119150.1 | 0.100224 |
| FTH1P8     | 0.100221 |
| FOXS1      | 0.100198 |
| HDAC11     | 0.100171 |
| CCDC58     | 0.100108 |
| ERF        | 0.100071 |
| RAI1       | 0.100006 |
| LRPPRC     | 0.100003 |
| RPL13AP7   | 0.099972 |
| EMC6       | 0.099943 |
| PAIP1      | 0.099933 |
| ARL6IP6    | 0.099882 |
| HSPB1      | 0.099853 |
| PEDS1      | 0.099828 |
| MMADHC     | 0.099828 |
| SAPCD2     | 0.099778 |
| CRELD1     | 0.099701 |
| H2AX       | 0.099607 |
| DDIT4L     | 0.099584 |
| ARSL       | 0.099481 |
| LINC00853  | 0.099406 |
| ASL        | 0.099379 |
| DTX2       | 0.099328 |
| TATDN1     | 0.099309 |
| PPIL1      | 0.099286 |
| GPD2       | 0.099274 |
| NGRN       | 0.099265 |
| GLI2       | 0.09926  |
| RNU6-137P  | 0.099249 |
| MAP2K1     | 0.099238 |
| NDNF       | 0.099197 |
| WDR44      | 0.099187 |

|            |          |
|------------|----------|
| CRAT       | 0.099179 |
| ADAM10     | 0.099145 |
| S100A11    | 0.09912  |
| LHFPL4     | 0.099118 |
| AC125494.2 | 0.099094 |
| GABRB3     | 0.098972 |
| PLP2       | 0.098955 |
| TMTC4      | 0.098946 |
| AL589765.4 | 0.098942 |
| KIAA1191   | 0.098938 |
| ORMDL2     | 0.098932 |
| CNIH3      | 0.098922 |
| BCR        | 0.098858 |
| HSPA4      | 0.09884  |
| ALDH6A1    | 0.098826 |
| CRYZ       | 0.098824 |
| COL8A2     | 0.09882  |
| FBLIM1     | 0.098785 |
| KIF18A     | 0.098755 |
| DCHS1      | 0.09869  |
| AC130689.1 | 0.098684 |
| RHPN2      | 0.098623 |
| AC005912.1 | 0.098613 |
| GAR1       | 0.098548 |
| FAM234A    | 0.098537 |
| CLTRN      | 0.098526 |
| VSIG2      | 0.098487 |
| PCDHGA10   | 0.098456 |
| ETV5       | 0.098425 |
| GUCY1B2    | 0.098392 |
| RARRES1    | 0.098371 |
| DARS1      | 0.098352 |
| ATN1       | 0.098346 |
| LINC00886  | 0.098338 |
| AKT1S1     | 0.09833  |
| PITPNA-AS1 | 0.098259 |
| B3GNT9     | 0.098173 |
| SNRPD2     | 0.098118 |
| PFKM       | 0.098111 |
| COPG1      | 0.098077 |
| YWHAZP3    | 0.098064 |
| ZNF277     | 0.09805  |
| PRIM2      | 0.097985 |
| WASF1      | 0.097971 |
| RBP4       | 0.097929 |
| TSACC      | 0.097892 |
| SRC        | 0.097834 |
| STT3A      | 0.097817 |
| AL354892.2 | 0.097813 |

|            |          |
|------------|----------|
| AC007996.1 | 0.097792 |
| ADAMTS4    | 0.097718 |
| BICDL1     | 0.097688 |
| HSPA8      | 0.097622 |
| MGAT4B     | 0.097567 |
| TXNRD2     | 0.097559 |
| AC073389.3 | 0.097557 |
| TEKT4P2    | 0.097518 |
| KCTD2      | 0.097426 |
| AL158206.1 | 0.097345 |
| TMEM33     | 0.097298 |
| MPZL3      | 0.097258 |
| KIF18B     | 0.097178 |
| TNKS1BP1   | 0.09714  |
| SYT8       | 0.097121 |
| GAREM1     | 0.097054 |
| SH2D4A     | 0.096997 |
| RCCD1      | 0.096993 |
| VNN1       | 0.096972 |
| BTBD2      | 0.096971 |
| RNF215     | 0.096967 |
| REEP3      | 0.096938 |
| TMEM120B   | 0.096925 |
| HDLBP      | 0.096865 |
| AC017074.1 | 0.096852 |
| NAXD       | 0.096846 |
| SCARA3     | 0.096835 |
| ZNF622     | 0.096784 |
| TAX1BP1    | 0.096758 |
| FAM98A     | 0.096753 |
| AC005332.5 | 0.096727 |
| SHROOM1    | 0.096677 |
| MEA1       | 0.096546 |
| CLDN15     | 0.096501 |
| AC026368.1 | 0.096491 |
| DGCR2      | 0.096448 |
| MLST8      | 0.096396 |
| ST7        | 0.096326 |
| FAM210A    | 0.09632  |
| MCCC1      | 0.096311 |
| SH3BP5L    | 0.0963   |
| OR7E7P     | 0.09627  |
| FAM83E     | 0.096245 |
| TRIM47     | 0.096221 |
| PARD3-AS1  | 0.096164 |
| RAD23B     | 0.096163 |
| SLC26A9    | 0.096149 |
| TMEM106B   | 0.096132 |
| NEK2       | 0.096087 |



|            |          |
|------------|----------|
| NUP153-AS1 | 0.09607  |
| YBX3       | 0.095981 |
| RELL1      | 0.09595  |
| NOP14-AS1  | 0.095875 |
| GFUS       | 0.095863 |
| GPKOW      | 0.095851 |
| SRF        | 0.09585  |
| CBX4       | 0.095789 |
| BABAM2     | 0.095754 |
| SPTLC1     | 0.095748 |
| RFX1       | 0.095713 |
| DAB2IP     | 0.095693 |
| PDK2       | 0.0956   |
| ZNF687-AS1 | 0.095573 |
| YIF1A      | 0.095556 |
| TMEM181    | 0.095534 |
| PARVA      | 0.095522 |
| LMTK3      | 0.095479 |
| FGD1       | 0.095473 |
| TMEM91     | 0.095447 |
| COPA       | 0.095435 |
| CLEC11A    | 0.095407 |
| RPL10A     | 0.095302 |
| MAL2       | 0.095284 |
| KCTD5      | 0.095231 |
| OTUB2      | 0.095227 |
| ING2       | 0.095204 |
| CDH1       | 0.095164 |
| CYP51A1    | 0.095151 |
| SEPTIN3    | 0.095089 |
| LCN12      | 0.095084 |
| OLA1       | 0.095055 |
| LAYN       | 0.094966 |
| WFS1       | 0.094965 |
| NCKAP1     | 0.094964 |
| SFTA2      | 0.094952 |
| TPT1P9     | 0.094929 |
| AL034379.1 | 0.094908 |
| RING1      | 0.094866 |
| OLFML2B    | 0.09484  |
| TOM1       | 0.094806 |
| RNU2-27P   | 0.094798 |
| TBRG4      | 0.094792 |
| LYPLA2     | 0.094681 |
| RPAP1      | 0.094649 |
| CHCHD2P9   | 0.094607 |
| RCC1L      | 0.094597 |
| FAT1       | 0.094588 |
| ZWINT      | 0.094558 |

|            |          |
|------------|----------|
| TMEM11     | 0.094479 |
| EEF1A1P9   | 0.094443 |
| SRRM3      | 0.094402 |
| CBX3       | 0.094397 |
| AC139149.1 | 0.094372 |
| ZFPM2-AS1  | 0.094301 |
| RRP9       | 0.09419  |
| BLZF1      | 0.094102 |
| NUDT15     | 0.094092 |
| NDUFAF2P1  | 0.094017 |
| CASP9      | 0.093968 |
| ID1        | 0.093918 |
| RPH3AL     | 0.093906 |
| RRS1       | 0.093882 |
| FAM86C2P   | 0.093873 |
| GALNT11    | 0.093834 |
| RABL3      | 0.093777 |
| JAGN1      | 0.093762 |
| ADAM12     | 0.093755 |
| PTGFRN     | 0.093737 |
| MRPL10     | 0.093611 |
| CDCA7L     | 0.093604 |
| RPUSD4     | 0.093587 |
| TNPO1      | 0.093549 |
| PGLS       | 0.093519 |
| RPS15AP1   | 0.093506 |
| SMIM22     | 0.093506 |
| RPRD2      | 0.093499 |
| NEXN       | 0.093498 |
| PPIA       | 0.093465 |
| KCMF1      | 0.093401 |
| MARK4      | 0.09339  |
| GPR4       | 0.09336  |
| RARS1      | 0.093345 |
| OXSRL      | 0.093334 |
| NPM1       | 0.093323 |
| VPS18      | 0.093301 |
| PA2G4      | 0.093261 |
| MAPK7      | 0.093254 |
| NDUFS6     | 0.09321  |
| FDX1       | 0.093195 |
| RPL22P24   | 0.09313  |
| AL122023.1 | 0.093059 |
| MCUR1      | 0.092974 |
| RRP1B      | 0.092959 |
| H6PD       | 0.092918 |
| ACSL4      | 0.092889 |
| AP1M2      | 0.092812 |
| THNSL1     | 0.092775 |

|            |          |
|------------|----------|
| RUSF1      | 0.092768 |
| AC121338.2 | 0.09275  |
| SIRT7      | 0.092727 |
| AC114810.1 | 0.092701 |
| DDAH1      | 0.092669 |
| WDR76      | 0.092611 |
| PES1       | 0.092591 |
| RPS27AP11  | 0.09258  |
| CRADD      | 0.092579 |
| BTBD6      | 0.092571 |
| TREM1      | 0.092553 |
| GCC1       | 0.09255  |
| GOLGA2     | 0.092547 |
| SEPTIN9    | 0.092538 |
| TPM3       | 0.092527 |
| TIMELESS   | 0.092479 |
| NACA       | 0.092474 |
| RASSF3     | 0.092456 |
| KIFBP      | 0.09245  |
| ARHGEF10   | 0.092431 |
| SELENBP1   | 0.092402 |
| COASY      | 0.092366 |
| PPP3CA     | 0.092287 |
| SFRP4      | 0.092226 |
| AL513534.2 | 0.092218 |
| AAMP       | 0.092206 |
| SAMD14     | 0.092196 |
| ZNF385C    | 0.092193 |
| DNAJC14    | 0.092187 |
| ADGRG1     | 0.092184 |
| ZYX        | 0.092136 |
| TNPO3      | 0.092124 |
| APH1A      | 0.092081 |
| RPS3AP20   | 0.09206  |
| CASP6      | 0.09203  |
| AC004846.1 | 0.092004 |
| ATP2C2     | 0.091958 |
| LANCL2     | 0.091871 |
| AP003469.2 | 0.091852 |
| SNHG15     | 0.091815 |
| MOB3B      | 0.091799 |
| PSMC5      | 0.091771 |
| UBXN8      | 0.091754 |
| MLF2       | 0.091736 |
| ATP5F1B    | 0.091718 |
| NEDD9      | 0.091692 |
| BHMT2      | 0.091678 |
| KDM1A      | 0.091652 |
| RPL36A     | 0.091636 |

|            |          |
|------------|----------|
| AL162595.1 | 0.091623 |
| PEX10      | 0.091599 |
| ILF2       | 0.091598 |
| DGCR11     | 0.091588 |
| ZBTB11-AS1 | 0.09155  |
| PLBD2      | 0.091547 |
| SNUPN      | 0.091511 |
| PYGB       | 0.091475 |
| RPS2       | 0.091465 |
| FTH1       | 0.091461 |
| LIF        | 0.091424 |
| PWWP2B     | 0.091388 |
| EIF3I      | 0.09138  |
| AP000892.4 | 0.091344 |
| TULP3      | 0.091324 |
| SF3A3      | 0.091306 |
| EIF2AK4    | 0.09121  |
| LINC02693  | 0.091131 |
| AC026369.2 | 0.091128 |
| ZKSCAN3    | 0.091099 |
| SPINDOC    | 0.091026 |
| ERGIC2     | 0.091013 |
| TMEM101    | 0.091009 |
| CDIN1      | 0.091004 |
| RTF1       | 0.09088  |
| NF2        | 0.090874 |
| EMC4       | 0.090822 |
| PI4KB      | 0.09078  |
| MIR4263    | 0.090753 |
| AC093323.1 | 0.090741 |
| DEPDC1B    | 0.090701 |
| AC022364.1 | 0.090682 |
| PSMB6      | 0.090671 |
| UAP1       | 0.090657 |
| SDC2       | 0.090556 |
| ADIPOR1    | 0.090521 |
| SMYD5      | 0.090519 |
| LAPTM4A    | 0.09041  |
| NCKIPSD    | 0.090297 |
| ETFB       | 0.090213 |
| RPS18      | 0.090057 |
| TSPO       | 0.089946 |
| TFPI       | 0.089839 |
| ZNF853     | 0.089695 |
| HDGFL3     | 0.089629 |
| TXNDC17    | 0.089613 |
| PCDHAC2    | 0.08961  |
| ACY1       | 0.089606 |
| IRF2BP1    | 0.089604 |

|            |          |
|------------|----------|
| ETNK2      | 0.089571 |
| KAZALD1    | 0.089506 |
| ACOT4      | 0.089496 |
| GALNT15    | 0.089458 |
| CAPN2      | 0.089439 |
| TUBGCP4    | 0.089378 |
| AC016582.2 | 0.089369 |
| DTYMK      | 0.089338 |
| CPNE2      | 0.089312 |
| SDF4       | 0.089264 |
| NR1D1      | 0.08926  |
| PFN4       | 0.089246 |
| NDUFB4     | 0.089232 |
| SELENOI    | 0.08922  |
| NUP88      | 0.089191 |
| DHX32      | 0.089178 |
| LINC01719  | 0.089164 |
| UBE3C      | 0.089122 |
| STIP1      | 0.089099 |
| IFT57      | 0.089059 |
| TMED4      | 0.089037 |
| RHOBTB2    | 0.089033 |
| PGK1       | 0.088973 |
| PEX12      | 0.088948 |
| JARID2     | 0.088944 |
| NECTIN2    | 0.088936 |
| FBXO45     | 0.088905 |
| COX6CP1    | 0.088892 |
| AKR7A2     | 0.088861 |
| ZW10       | 0.088851 |
| LINC00885  | 0.088841 |
| TIMM22     | 0.088825 |
| PBX3       | 0.088811 |
| RBM15B     | 0.088803 |
| SH2B2      | 0.088803 |
| AL590867.2 | 0.088765 |
| SMC3       | 0.088761 |
| RPS7P1     | 0.088719 |
| PATJ       | 0.088573 |
| SERPINB6   | 0.088488 |
| ST20-AS1   | 0.088437 |
| TLE1       | 0.088384 |
| PHB        | 0.088324 |
| LINC00863  | 0.088302 |
| NDEL1      | 0.088302 |
| YIPF5      | 0.088301 |
| RPL10P15   | 0.088294 |
| TDRKH      | 0.088278 |
| MZT2B      | 0.088233 |

|            |          |
|------------|----------|
| CPNE4      | 0.088225 |
| TMEM209    | 0.088205 |
| ZBTB7B     | 0.088194 |
| SLC22A5    | 0.088181 |
| TUBB4B     | 0.088146 |
| MARCKSL1   | 0.088144 |
| RALB       | 0.088092 |
| BNIP3      | 0.088032 |
| NHP2       | 0.088008 |
| TLCD1      | 0.087978 |
| MIR7111    | 0.087926 |
| AC022034.1 | 0.087906 |
| TCP1       | 0.087884 |
| POLR2L     | 0.087869 |
| CDR2       | 0.087789 |
| DNM1L      | 0.087788 |
| STMP1      | 0.087766 |
| LDOC1      | 0.087759 |
| F11R       | 0.087713 |
| PRELID1P5  | 0.087657 |
| EEF2KMT    | 0.087654 |
| NRM        | 0.087626 |
| PHAX       | 0.087508 |
| ZNF579     | 0.087484 |
| BGN        | 0.087436 |
| CASKIN2    | 0.08742  |
| BLM        | 0.087399 |
| DACT3      | 0.087366 |
| ATP10A     | 0.08732  |
| AL136380.1 | 0.087317 |
| DNMBP      | 0.08728  |
| FTH1P12    | 0.087259 |
| RGS3       | 0.087256 |
| PLPBP      | 0.08725  |
| LINC01564  | 0.087229 |
| RCOR2      | 0.0872   |
| CEBPA      | 0.087135 |
| BCL2L13    | 0.087112 |
| TTC7A      | 0.087077 |
| SPATA5     | 0.087076 |
| BICD1      | 0.087061 |
| CCDC137    | 0.087027 |
| TFE3       | 0.087007 |
| SNX21      | 0.086969 |
| EIF3A      | 0.086957 |
| FUT11      | 0.086941 |
| ULBP1      | 0.086902 |
| CABLES2    | 0.086894 |
| SMG8       | 0.086846 |

|            |          |
|------------|----------|
| KPNA3      | 0.086812 |
| SLC44A5    | 0.086758 |
| AC067852.2 | 0.086699 |
| CCN2       | 0.086614 |
| NLRX1      | 0.086602 |
| FZD5       | 0.086592 |
| PLS3       | 0.08657  |
| VIM        | 0.086554 |
| UBL4A      | 0.086553 |
| CHCHD3     | 0.086523 |
| IMP3       | 0.086498 |
| SAR1A      | 0.086478 |
| IL31RA     | 0.08646  |
| MAFG       | 0.086404 |
| LRRK2      | 0.086377 |
| TBCAP1     | 0.086369 |
| TMEM256    | 0.086308 |
| PCSK5      | 0.086296 |
| DDA1       | 0.086294 |
| GFER       | 0.08625  |
| EDC3       | 0.086241 |
| MAGED2     | 0.086222 |
| AARS2      | 0.086162 |
| RPL15      | 0.086126 |
| WASF2      | 0.086117 |
| CENPH      | 0.086091 |
| RELA       | 0.086091 |
| SMUG1      | 0.086023 |
| RALBP1     | 0.08602  |
| KIF4A      | 0.086015 |
| RPL39P3    | 0.085971 |
| IMPA2      | 0.085968 |
| STMN1      | 0.085938 |
| ACSL3      | 0.085921 |
| SPDL1      | 0.085908 |
| ZKSCAN5    | 0.085863 |
| UBQLN2     | 0.085858 |
| DMWD       | 0.085825 |
| MRPL36     | 0.085815 |
| COMMD4     | 0.085763 |
| IPO5       | 0.085756 |
| KCND1      | 0.085741 |
| SLC39A11   | 0.085678 |
| SLC37A3    | 0.085579 |
| AC034213.1 | 0.085576 |
| GTF2A2     | 0.085538 |
| EVC        | 0.085521 |
| ANKMY2     | 0.085511 |
| FBXO22     | 0.085501 |

|            |          |
|------------|----------|
| RIOK1      | 0.085501 |
| REEP6      | 0.085495 |
| RPL22L1    | 0.08548  |
| TECRP1     | 0.08546  |
| AL121944.1 | 0.085413 |
| FBXW8      | 0.085379 |
| UNG        | 0.085353 |
| AL353150.1 | 0.085316 |
| AK1        | 0.085259 |
| PHETA2     | 0.085254 |
| AC106028.3 | 0.085251 |
| AC017100.1 | 0.085236 |
| ACTL6A     | 0.085222 |
| SPACA4     | 0.085186 |
| ILK        | 0.085085 |
| NUBP2      | 0.084962 |
| MRPL28     | 0.084949 |
| KCNK5      | 0.084887 |
| FIBIN      | 0.084885 |
| DAP3       | 0.084858 |
| AC005255.1 | 0.084826 |
| MBTPS2     | 0.084818 |
| KPNA6      | 0.084807 |
| IVD        | 0.08478  |
| SLC44A4    | 0.084725 |
| RILP       | 0.084675 |
| UBE2G1     | 0.084671 |
| MICAL3     | 0.084631 |
| TMED7      | 0.084628 |
| AL035446.1 | 0.084591 |
| POMZP3     | 0.084588 |
| THY1       | 0.084579 |
| AC008429.2 | 0.084555 |
| HDAC7      | 0.084553 |
| SLC7A5     | 0.084538 |
| GALE       | 0.084503 |
| EVPL       | 0.084479 |
| SLC35E1    | 0.084469 |
| SLC16A2    | 0.084453 |
| ZSCAN2     | 0.08442  |
| TBL2       | 0.084385 |
| ECT2       | 0.084385 |
| RUVBL1     | 0.084383 |
| RPL39P15   | 0.084375 |
| FDPS       | 0.084355 |
| AC011479.1 | 0.084324 |
| CBX1       | 0.084218 |
| ABCF3      | 0.084207 |
| MORF4L1    | 0.084194 |



|            |          |
|------------|----------|
| RANBP9     | 0.084159 |
| MFSD5      | 0.084157 |
| SNAP29     | 0.084132 |
| NT5M       | 0.084114 |
| MMS19      | 0.084055 |
| DCBLD1     | 0.084046 |
| MED10      | 0.08402  |
| MACROD1    | 0.083967 |
| ZNF702P    | 0.083932 |
| NDUFAF2    | 0.083903 |
| DET1       | 0.083828 |
| PMF1       | 0.083807 |
| EGFL7      | 0.083785 |
| AL359715.3 | 0.083775 |
| GOLPH3     | 0.083769 |
| SNRNP40    | 0.083722 |
| TSPAN2     | 0.083684 |
| CISD3      | 0.083669 |
| STK35      | 0.083664 |
| ENDOV      | 0.083638 |
| ITPRIPL2   | 0.083625 |
| SOWAHB     | 0.083615 |
| AP2A1      | 0.083614 |
| SLC4A1AP   | 0.083519 |
| LRP12      | 0.083494 |
| ZNF282     | 0.083489 |
| KCTD3      | 0.083432 |
| CHTF8      | 0.083369 |
| TBL3       | 0.083368 |
| FGD6       | 0.083349 |
| PRCC       | 0.083247 |
| METAP2     | 0.083244 |
| ZNF3       | 0.083222 |
| MAPK13     | 0.083212 |
| DAPK3      | 0.083094 |
| DYNLL2     | 0.083068 |
| WDR86      | 0.083063 |
| AL450998.1 | 0.083017 |
| RTKN       | 0.082976 |
| AC092687.3 | 0.082973 |
| CARNMT1    | 0.082962 |
| NME7       | 0.082923 |
| ZNF415     | 0.082917 |
| MICALL2    | 0.082889 |
| VDAC1      | 0.082831 |
| MYCBP      | 0.082829 |
| AC099509.1 | 0.082815 |
| FAM131A    | 0.082752 |
| SH3D21     | 0.082741 |

|            |          |
|------------|----------|
| LANCL1     | 0.082707 |
| DDX11      | 0.082662 |
| AC138649.1 | 0.08266  |
| EIF4B      | 0.082586 |
| PSME3      | 0.082584 |
| PDIA6      | 0.082578 |
| SOGA1      | 0.082569 |
| MIDN       | 0.082564 |
| DDT        | 0.082469 |
| DALRD3     | 0.082463 |
| KIAA1586   | 0.082458 |
| EIF2AK1    | 0.082446 |
| PHLDA3     | 0.082388 |
| SNRPE      | 0.082384 |
| SLC25A3    | 0.082368 |
| PGGHG      | 0.082321 |
| CCNE1      | 0.082314 |
| LDHAP3     | 0.082298 |
| ZMPSTE24   | 0.082298 |
| EIF3FP3    | 0.082208 |
| PPFIA4     | 0.082101 |
| ZNF362     | 0.082069 |
| PXDC1      | 0.082058 |
| UQCRC1     | 0.082011 |
| AL450124.1 | 0.081999 |
| AC089983.1 | 0.081988 |
| MPDU1      | 0.081933 |
| CORO1C     | 0.081928 |
| MPZL1      | 0.081874 |
| CEBPZ      | 0.081792 |
| NIPA2      | 0.081724 |
| PRXL2A     | 0.081696 |
| IL6        | 0.081687 |
| ADSS2      | 0.081645 |
| AL161785.1 | 0.081603 |
| SNRPEP2    | 0.081595 |
| PDCD11     | 0.081593 |
| POFUT2     | 0.081519 |
| MIR200CHG  | 0.08149  |
| COL9A2     | 0.081478 |
| BLOC1S4    | 0.081469 |
| FTH1P23    | 0.081455 |
| TBL1X      | 0.081447 |
| RFLNB      | 0.081437 |
| AURKAIP1   | 0.081433 |
| RAN        | 0.081339 |
| NPM3       | 0.081325 |
| SAC3D1     | 0.081322 |
| MRFAP1     | 0.081305 |

|            |          |
|------------|----------|
| PEBP4      | 0.081295 |
| RPL32P16   | 0.081161 |
| DBNDD1     | 0.081126 |
| PRR13      | 0.081096 |
| BTF3L4     | 0.081062 |
| CYFIP1     | 0.081058 |
| LMNB1      | 0.081038 |
| EEF1DP1    | 0.081002 |
| TMEM14B    | 0.080982 |
| STMN3      | 0.080962 |
| CSNK1A1    | 0.080962 |
| RAMAC      | 0.080944 |
| TMEM250    | 0.080914 |
| ILVBL      | 0.080914 |
| DDX41      | 0.08091  |
| RFNG       | 0.080872 |
| RACK1      | 0.080824 |
| IPO9       | 0.080818 |
| PRUNE1     | 0.080813 |
| MKI67      | 0.080742 |
| C1QBP      | 0.08071  |
| PELI3      | 0.080694 |
| CDCA3      | 0.080636 |
| TRIM27     | 0.080607 |
| WDFY3-AS2  | 0.080514 |
| KATNBL1    | 0.080514 |
| CENPU      | 0.080477 |
| RAB43P1    | 0.080473 |
| ISM1       | 0.080469 |
| NFXL1      | 0.080453 |
| TMEM267    | 0.080414 |
| ASS1       | 0.08039  |
| ANO6       | 0.080368 |
| RPS17      | 0.080336 |
| SSBP1      | 0.080331 |
| KIF20B     | 0.08025  |
| ZNF131     | 0.080208 |
| MIR621     | 0.080177 |
| SLC3A2     | 0.080148 |
| BCL7A      | 0.080142 |
| CSNK2A1    | 0.08011  |
| BANF1P3    | 0.080093 |
| NBEAP2     | 0.080056 |
| THOC6      | 0.080049 |
| CATSPER2P1 | 0.080008 |
| CCNF       | 0.080006 |
| EIF5B      | 0.08     |
| SGO2       | 0.079969 |
| DHX57      | 0.07995  |

|            |          |
|------------|----------|
| PRRG2      | 0.079942 |
| UBE2O      | 0.079932 |
| AL603750.1 | 0.079913 |
| KATNAL1    | 0.079913 |
| CD248      | 0.079871 |
| CSTB       | 0.079862 |
| FAAP20     | 0.079834 |
| FBXW5      | 0.079832 |
| TRUB2      | 0.079813 |
| SLC30A6    | 0.079797 |
| CLOCK      | 0.079794 |
| EPCAM      | 0.079778 |
| F8A1       | 0.079753 |
| CDK7       | 0.079685 |
| HDDC2      | 0.079597 |
| BCL7B      | 0.079503 |
| SIGLEC6    | 0.079467 |
| CEP55      | 0.079461 |
| IQGAP1     | 0.079433 |
| KCNK6      | 0.079429 |
| C1orf109   | 0.079413 |
| ARF5       | 0.079392 |
| AC009549.1 | 0.079315 |
| BLCAP      | 0.07927  |
| PRELID2    | 0.079268 |
| SNX25P1    | 0.079263 |
| PRIM1      | 0.07922  |
| LENG9      | 0.079211 |
| PPRC1      | 0.079161 |
| GMPS       | 0.079125 |
| LGALS1     | 0.079124 |
| GPR107     | 0.079116 |
| DCST1-AS1  | 0.079112 |
| RAB13      | 0.079103 |
| FLRT3      | 0.079094 |
| TMEM222    | 0.079076 |
| PCBD1      | 0.07904  |
| DANCR      | 0.079035 |
| CDC42EP5   | 0.078999 |
| GCSH       | 0.078996 |
| SMPD4      | 0.078995 |
| NACC1      | 0.078993 |
| SENP8      | 0.078992 |
| MDFIC      | 0.078979 |
| F2R        | 0.078975 |
| SULT1A1    | 0.078931 |
| CD99       | 0.078915 |
| MAPK14     | 0.078905 |
| C5orf38    | 0.07889  |

|            |          |
|------------|----------|
| COPS7A     | 0.078882 |
| SERF2      | 0.07888  |
| PTPRK      | 0.07885  |
| RNF8       | 0.078799 |
| MEGF8      | 0.078683 |
| SENP3      | 0.078633 |
| SNAP47     | 0.07863  |
| TMEM200A   | 0.07862  |
| HPS6       | 0.078584 |
| PFKL       | 0.078582 |
| CRTC2      | 0.078573 |
| NOL7       | 0.07853  |
| TMEM164    | 0.078518 |
| SCAF1      | 0.078504 |
| MGLL       | 0.078493 |
| GPS1       | 0.078477 |
| GBF1       | 0.078461 |
| RPL10P3    | 0.07843  |
| ABCF2      | 0.078378 |
| CLCF1      | 0.078334 |
| NR4A3      | 0.078321 |
| SLC17A9    | 0.078262 |
| LINC01269  | 0.07825  |
| KNL1       | 0.078177 |
| FO XK2     | 0.078164 |
| NDUFS2     | 0.0781   |
| ARHGAP10   | 0.078099 |
| ZDHHC4     | 0.078089 |
| ZNF668     | 0.078089 |
| SLC9A1     | 0.078084 |
| RPL12P4    | 0.077991 |
| NLN        | 0.077985 |
| CBLC       | 0.07798  |
| ORC5       | 0.077966 |
| PDCD6      | 0.077966 |
| NAPEPLD    | 0.077943 |
| MSRB1      | 0.077872 |
| ZFAND1     | 0.077841 |
| EDARADD    | 0.077813 |
| ATP13A2    | 0.077737 |
| CREG1      | 0.077698 |
| AP000757.1 | 0.077638 |
| ALG1       | 0.077621 |
| SETD7      | 0.077601 |
| CACFD1     | 0.077597 |
| SNX24      | 0.077595 |
| EEF1AKNMT  | 0.077557 |
| OGDH       | 0.077522 |
| PLTP       | 0.077463 |

|           |          |
|-----------|----------|
| FBLN2     | 0.077346 |
| C1QTNF2   | 0.077325 |
| DEXI      | 0.0773   |
| FAM200A   | 0.077294 |
| LINC01547 | 0.077281 |
| PDE9A     | 0.077197 |
| FAM174B   | 0.077139 |
| TKFC      | 0.077139 |
| RPL4      | 0.077139 |
| SLC6A9    | 0.077069 |
| BICDL2    | 0.07705  |
| CAMSAP3   | 0.07703  |
| DOLPP1    | 0.077028 |
| SBNO2     | 0.076995 |
| TCEA2     | 0.07686  |
| FAAH      | 0.07684  |
| CCN1      | 0.076822 |
| TM4SF19   | 0.076817 |
| CUTA      | 0.076773 |
| EME1      | 0.07672  |
| PRPSAP2   | 0.076685 |
| PAQR4     | 0.076661 |
| RPS25     | 0.076654 |
| WRNIP1    | 0.076653 |
| PSMB4     | 0.076607 |
| ZNF74     | 0.076592 |
| YTHDF1    | 0.07659  |
| COX10     | 0.076544 |
| ELF4      | 0.076509 |
| ATRAID    | 0.076497 |
| SELENOOLP | 0.076493 |
| MMUT      | 0.07647  |
| PRAF2     | 0.07647  |
| SETDB1    | 0.076435 |
| GPANK1    | 0.076426 |
| SEC31A    | 0.076373 |
| B3GALT4   | 0.0763   |
| RASD1     | 0.076294 |
| IRAK2     | 0.076291 |
| ATRN      | 0.076227 |
| C6orf89   | 0.076206 |
| TAF1A     | 0.076192 |
| ARPP19    | 0.076183 |
| TIMM8A    | 0.076153 |
| CBX8      | 0.076107 |
| C15orf62  | 0.07609  |
| MRTO4     | 0.076089 |
| YRDC      | 0.076076 |
| BMT2      | 0.076049 |

|            |          |
|------------|----------|
| ACOX1      | 0.076044 |
| DRG2       | 0.076008 |
| EVI5L      | 0.07599  |
| MNX1       | 0.075975 |
| IQSEC2     | 0.075974 |
| RPL9P7     | 0.075956 |
| MTMR12     | 0.07594  |
| PTP4A2P1   | 0.075933 |
| LINC02588  | 0.075931 |
| AC022509.3 | 0.075928 |
| ZCCHC17    | 0.075899 |
| ACVR1      | 0.07587  |
| TM2D1      | 0.075853 |
| TARBP2     | 0.075825 |
| ACTR3B     | 0.075816 |
| SEC13      | 0.075759 |
| SLC25A23   | 0.075733 |
| ELFN2      | 0.07573  |
| SLC9A7     | 0.075718 |
| SAMM50     | 0.075694 |
| INHBB      | 0.075687 |
| PLD3       | 0.075659 |
| ZNF710     | 0.075649 |
| DHX16      | 0.075612 |
| RNF121     | 0.075568 |
| BAK1       | 0.075559 |
| MTND6P4    | 0.075505 |
| YTHDF2P1   | 0.075492 |
| SCAMP1     | 0.075475 |
| DCUN1D1    | 0.075456 |
| KCNMB2-AS1 | 0.075456 |
| CRACR2B    | 0.075433 |
| LDLR       | 0.075429 |
| MAP2K5     | 0.075418 |
| RNF220     | 0.075331 |
| TCEAL9     | 0.075286 |
| UBE4B      | 0.075252 |
| RARA-AS1   | 0.075213 |
| AL133216.2 | 0.075193 |
| IER5       | 0.075173 |
| EEF1GP1    | 0.075171 |
| ANAPC13    | 0.075168 |
| NDUFB2     | 0.075154 |
| CFL1       | 0.075105 |
| CECR2      | 0.075084 |
| AC007849.1 | 0.07507  |
| ZNF384     | 0.07507  |
| NCAM2      | 0.075061 |
| POR        | 0.074999 |

|            |          |
|------------|----------|
| ABCE1      | 0.074985 |
| AC112497.2 | 0.074963 |
| P3H4       | 0.074951 |
| UPP1       | 0.074949 |
| FTSJ3      | 0.074943 |
| RFT1       | 0.074836 |
| ECI2       | 0.074813 |
| MTHFD1L    | 0.074734 |
| SUPT3H     | 0.074643 |
| ISG20L2    | 0.07463  |
| CHST2      | 0.074542 |
| ADRM1      | 0.07454  |
| PGAP6      | 0.074511 |
| SRP9P1     | 0.07449  |
| FBXL19     | 0.074448 |
| MRPS28     | 0.074434 |
| PSMB2      | 0.074398 |
| FZD8       | 0.074321 |
| DVL3       | 0.074305 |
| TPCN1      | 0.074288 |
| FKBP14     | 0.074279 |
| ANXA5      | 0.074267 |
| FIGNL1     | 0.074254 |
| SKIV2L     | 0.074248 |
| AC023509.3 | 0.07423  |
| YES1       | 0.074203 |
| LINC02562  | 0.074177 |
| WBP11      | 0.074154 |
| RECQL      | 0.074114 |
| XKR8       | 0.074101 |
| CORO2A     | 0.074042 |
| PCAT6      | 0.07403  |
| ZSCAN12P1  | 0.073994 |
| TMEM182    | 0.073986 |
| UBXN2A     | 0.073986 |
| ZNF521     | 0.073971 |
| JRKL       | 0.073967 |
| KPNA1      | 0.073963 |
| RPP25      | 0.07395  |
| LCMT2      | 0.073942 |
| TMEM165    | 0.073935 |
| PPP1R14A   | 0.073932 |
| VAV2       | 0.073925 |
| SYTL4      | 0.073922 |
| CMSS1      | 0.073872 |
| MAZ        | 0.073807 |
| PDGFRB     | 0.073741 |
| NDRG3      | 0.073737 |
| KIAA2013   | 0.073729 |



|            |          |
|------------|----------|
| STEAP1     | 0.073697 |
| ZBTB47     | 0.073651 |
| MORF4L2    | 0.073639 |
| TMEM104    | 0.07359  |
| CCDC71     | 0.073537 |
| NOL10      | 0.073461 |
| MYH9       | 0.073435 |
| TRRAP      | 0.073431 |
| STK25      | 0.073419 |
| CSNK2B     | 0.073401 |
| RNVU1-1    | 0.073358 |
| NRP2       | 0.073348 |
| HECTD3     | 0.073323 |
| RICTOR     | 0.073299 |
| GLT1D1     | 0.07323  |
| ZFYVE21    | 0.073194 |
| CES2       | 0.073167 |
| RTN4RL2    | 0.073158 |
| KLHDC10    | 0.073152 |
| ADAL       | 0.073131 |
| NPEPPS     | 0.073102 |
| XYLT2      | 0.073097 |
| MIB1       | 0.073018 |
| YBX1       | 0.073017 |
| STEAP3     | 0.073009 |
| RPL12      | 0.072937 |
| GORASP2    | 0.072906 |
| AC091849.1 | 0.072888 |
| RPL13AP25  | 0.072869 |
| ZFP64      | 0.072831 |
| TMEM129    | 0.07282  |
| FIBP       | 0.072812 |
| PID1       | 0.072811 |
| DGCR6L     | 0.072737 |
| TMEM44     | 0.072708 |
| EXOC3      | 0.072704 |
| AC008966.1 | 0.072696 |
| ZNF628     | 0.072658 |
| RETSAT     | 0.072646 |
| EXOC1      | 0.072641 |
| AGA        | 0.072599 |
| LINC01186  | 0.072588 |
| PCNX3      | 0.072577 |
| VTCN1      | 0.072576 |
| ARHGEF18   | 0.072576 |
| METTL9     | 0.072544 |
| LINC02356  | 0.072533 |
| PLAC8      | 0.072464 |
| DHX37      | 0.072389 |

|            |          |
|------------|----------|
| GOT2       | 0.072381 |
| ANAPC11    | 0.072356 |
| CHPF2      | 0.072322 |
| GNB1L      | 0.072318 |
| FN3K       | 0.072293 |
| MICAL2     | 0.072284 |
| MPI        | 0.072281 |
| FAHD1      | 0.072259 |
| RIN2       | 0.072245 |
| FLT4       | 0.072244 |
| LNK1       | 0.072242 |
| TOP3A      | 0.07217  |
| TCAIM      | 0.072129 |
| MCM6       | 0.072097 |
| ACADS      | 0.072083 |
| CLU        | 0.07208  |
| TJP2       | 0.072049 |
| MRM3       | 0.072047 |
| DLGAP5     | 0.072039 |
| PNPLA8     | 0.072035 |
| ZNF770     | 0.072026 |
| PTPN12     | 0.072025 |
| AC079610.1 | 0.07202  |
| AVL9       | 0.072015 |
| SMARCA1    | 0.07195  |
| CHMP1B     | 0.071926 |
| TMEM214    | 0.071923 |
| EXOSC5     | 0.07186  |
| RHBDF1     | 0.071849 |
| PLEKHG4    | 0.071827 |
| AL136304.1 | 0.071826 |
| LSM4       | 0.071818 |
| FRG1BP     | 0.071768 |
| HOXA3      | 0.071753 |
| TRMT10C    | 0.07173  |
| RHOBTB3    | 0.071728 |
| TJP3       | 0.071713 |
| PGAP2      | 0.071712 |
| RPS2P46    | 0.071708 |
| CAPN15     | 0.071695 |
| UQCRH      | 0.071686 |
| PACSIN2    | 0.071657 |
| CTNND1     | 0.071613 |
| HARS2      | 0.071562 |
| AL450326.1 | 0.071558 |
| OVGP1      | 0.07155  |
| FKBP7      | 0.07155  |
| QARS1      | 0.071543 |
| PMM1       | 0.071451 |

|             |          |
|-------------|----------|
| TRMT61B     | 0.071439 |
| ARHGAP21    | 0.071423 |
| ALKBH5      | 0.071416 |
| ATF7        | 0.071406 |
| RBMS1       | 0.071403 |
| C11orf1     | 0.071394 |
| HNRNPCP2    | 0.071388 |
| FAM86DP     | 0.071374 |
| APEX2       | 0.07136  |
| HEXA        | 0.071359 |
| DEK         | 0.07132  |
| CCHCR1      | 0.071308 |
| KLHDC8B     | 0.071275 |
| NOC4L       | 0.071264 |
| ZNF593      | 0.071238 |
| UBQLN1      | 0.071216 |
| H2BC21      | 0.07118  |
| GLRX2       | 0.071179 |
| ARHGAP1     | 0.071163 |
| ZNF205      | 0.071142 |
| DIABLO      | 0.071125 |
| PTPA        | 0.071106 |
| VEPH1       | 0.0711   |
| POLDIP2     | 0.07107  |
| HBP1        | 0.071034 |
| AL035458.1  | 0.070988 |
| RER1        | 0.070978 |
| SERTAD4-AS1 | 0.070946 |
| GEMIN5      | 0.070929 |
| MXI1        | 0.070914 |
| LAMTOR4     | 0.070892 |
| H3-3B       | 0.070812 |
| ASH2L       | 0.070746 |
| DST         | 0.070729 |
| SNU13       | 0.070718 |
| SNX7        | 0.070696 |
| HOXA5       | 0.070613 |
| PBXIP1      | 0.070574 |
| HIP1        | 0.070545 |
| ZMYM1       | 0.070479 |
| FAM110A     | 0.070478 |
| RFC4        | 0.070434 |
| SNF8        | 0.070425 |
| HSPA9       | 0.070324 |
| GRSF1       | 0.070302 |
| REXO4       | 0.070278 |
| NSUN5       | 0.070229 |
| PDIA3P1     | 0.070221 |
| TWF1        | 0.070127 |

|             |          |
|-------------|----------|
| PRICKLE3    | 0.07009  |
| ESRRA       | 0.070043 |
| UBTD2       | 0.070014 |
| SLC44A1     | 0.069979 |
| FAM168B     | 0.069977 |
| WDR5        | 0.069976 |
| TMEM17      | 0.069973 |
| AHNAK       | 0.06995  |
| WDR70       | 0.069923 |
| BAD         | 0.069861 |
| CPT2        | 0.069857 |
| NAPRT       | 0.069751 |
| RUSC1       | 0.069746 |
| RIOK3       | 0.069679 |
| OCIAD1      | 0.069628 |
| NOP16       | 0.069613 |
| LRRC61      | 0.069581 |
| POU3F2      | 0.069541 |
| PRAG1       | 0.069518 |
| RPL26       | 0.069445 |
| CARHSP1     | 0.069436 |
| ZNF329      | 0.069412 |
| OARD1       | 0.06941  |
| MAP2K3      | 0.069397 |
| TNIP1       | 0.069381 |
| TRIM6       | 0.06938  |
| C5orf51     | 0.069358 |
| MRC2        | 0.069355 |
| CPP         | 0.069348 |
| MYORG       | 0.069329 |
| AC009237.14 | 0.069327 |
| AFAP1L1     | 0.069309 |
| PTMAP5      | 0.069252 |
| TSPAN17     | 0.069206 |
| EIF3H       | 0.06919  |
| HEYL        | 0.069178 |
| ATP5PD      | 0.069153 |
| TTC27       | 0.069148 |
| ASCC1       | 0.069131 |
| FTH1P3      | 0.069104 |
| MYH14       | 0.069074 |
| RPP21       | 0.069069 |
| TPM1        | 0.069057 |
| FARSB       | 0.069056 |
| BHLHE40     | 0.06905  |
| KNOP1       | 0.069045 |
| SEC24C      | 0.069043 |
| RPUSD2      | 0.069005 |
| CHMP2B      | 0.068953 |

|            |          |
|------------|----------|
| TTC19      | 0.068947 |
| PRKAR2A    | 0.068929 |
| C3orf80    | 0.068905 |
| SLC25A5P5  | 0.068891 |
| AC015813.5 | 0.068879 |
| ZSWIM4     | 0.068802 |
| AASDHPPT   | 0.068799 |
| RRP1       | 0.068795 |
| EFNA1      | 0.068777 |
| FADS3      | 0.068775 |
| ZDHHHC7    | 0.068749 |
| ZFR        | 0.068742 |
| RPS27P29   | 0.068734 |
| WDR1       | 0.068725 |
| APRT       | 0.068695 |
| AC005520.2 | 0.068637 |
| ZNF574     | 0.068587 |
| RACGAP1    | 0.068584 |
| RAI14      | 0.068565 |
| DNASE1L1   | 0.068538 |
| SEC11A     | 0.068449 |
| TXNDC12    | 0.068419 |
| MRPL51     | 0.068345 |
| ELP5       | 0.068275 |
| SKP1       | 0.06827  |
| LIPG       | 0.068269 |
| FAM53A     | 0.068261 |
| LINC01006  | 0.068239 |
| SPIN1      | 0.068226 |
| LRP11      | 0.068218 |
| SLBP       | 0.068211 |
| HYOU1      | 0.068204 |
| PCBP4      | 0.068069 |
| SYMPK      | 0.068061 |
| ZWILCH     | 0.068057 |
| SLC50A1    | 0.068054 |
| ATOH8      | 0.068052 |
| YME1L1     | 0.068043 |
| DPAGT1     | 0.068038 |
| HEXIM1     | 0.068037 |
| CDK16      | 0.068033 |
| TMEM184B   | 0.067985 |
| AL136116.3 | 0.067978 |
| FBL        | 0.067962 |
| DIAPH1     | 0.067955 |
| VAT1       | 0.067939 |
| ZDHHHC12   | 0.067934 |
| TLE6       | 0.067902 |
| CYREN      | 0.067889 |

|            |          |
|------------|----------|
| USP40      | 0.067888 |
| SCARB1     | 0.067788 |
| ARPC3P3    | 0.067728 |
| SDHAF3     | 0.067698 |
| SLC26A6    | 0.067694 |
| SERTAD1    | 0.067677 |
| BCL6B      | 0.067675 |
| FBXO21     | 0.067658 |
| SLC38A2    | 0.067646 |
| S1PR3      | 0.067633 |
| FNDC3B     | 0.067567 |
| MYBL1      | 0.067523 |
| MAN1B1     | 0.067516 |
| SCAMP2     | 0.067478 |
| MANSC1     | 0.067466 |
| LHX6       | 0.067443 |
| UXS1       | 0.067413 |
| PARP4      | 0.067396 |
| SAMD1      | 0.067393 |
| SLC10A3    | 0.067375 |
| EIF1AXP1   | 0.067314 |
| GNB5       | 0.067286 |
| MARCHF6    | 0.067282 |
| SCN1B      | 0.067167 |
| ARF1       | 0.067128 |
| ATP1B1     | 0.067119 |
| SLC30A1    | 0.067111 |
| KRT16P2    | 0.067098 |
| CHMP1A     | 0.067076 |
| POGK       | 0.067038 |
| RNF144A    | 0.067033 |
| MAP1LC3C   | 0.067013 |
| MCAT       | 0.067011 |
| STAM       | 0.066942 |
| BRI3P1     | 0.066925 |
| TM9SF3     | 0.06691  |
| AC026271.1 | 0.066909 |
| SET        | 0.06689  |
| DNAJB12    | 0.066848 |
| TNFSF10    | 0.066838 |
| ABCC10     | 0.066815 |
| ATL2       | 0.0668   |
| JAG2       | 0.066725 |
| OGFOD1     | 0.066725 |
| CATSPER1   | 0.066618 |
| EML1       | 0.066542 |
| KLHL20     | 0.066482 |
| IGSF3      | 0.066438 |
| INPP5A     | 0.066415 |

|            |          |
|------------|----------|
| NFYC       | 0.066391 |
| AC009171.2 | 0.066378 |
| UBE3A      | 0.066299 |
| VKORC1     | 0.066292 |
| CCT7       | 0.066286 |
| CRLS1      | 0.066274 |
| CLN6       | 0.066237 |
| FTH1P16    | 0.066229 |
| MINPP1     | 0.066207 |
| GBA        | 0.066195 |
| SPAG7      | 0.065991 |
| RPL37A     | 0.065954 |
| NINJ1      | 0.065938 |
| MPHOSPH10  | 0.065921 |
| AL358075.2 | 0.065914 |
| C1DP1      | 0.065911 |
| IFNLR1     | 0.065875 |
| TJAP1      | 0.06587  |
| RAB5B      | 0.065807 |
| BTBD7      | 0.065737 |
| MRS2       | 0.065647 |
| RFC5       | 0.065626 |
| ACAT2      | 0.065612 |
| RPL32P27   | 0.065591 |
| SSR3       | 0.065496 |
| CMTM4      | 0.065495 |
| PSMD9      | 0.065443 |
| CD320      | 0.065428 |
| GAA        | 0.065404 |
| YEATS2     | 0.065371 |
| MUC13      | 0.065358 |
| HDHD3      | 0.065322 |
| NOP14      | 0.065317 |
| KPNA4      | 0.065314 |
| TRAPPC1    | 0.065296 |
| OCLN       | 0.065258 |
| DEAF1      | 0.065231 |
| NRARP      | 0.06522  |
| CSDE1      | 0.065187 |
| SIN3A      | 0.065179 |
| TYRP1      | 0.065151 |
| PRSS8      | 0.065148 |
| RPUSD3     | 0.065134 |
| MYO5C      | 0.065129 |
| BDH1       | 0.06509  |
| MYO19      | 0.065002 |
| POLR1A     | 0.064997 |
| RIC8A      | 0.064984 |
| MAGEF1     | 0.064949 |

|            |          |
|------------|----------|
| RNF40      | 0.064856 |
| METTL2A    | 0.064768 |
| PRDM16     | 0.064744 |
| SMIM19     | 0.06473  |
| CTNNBIP1   | 0.064718 |
| AL139156.2 | 0.064714 |
| FRMD8      | 0.064672 |
| NPTXR      | 0.06467  |
| MT-TL1     | 0.06461  |
| PP7080     | 0.064606 |
| FOXP4-AS1  | 0.064598 |
| LEO1       | 0.064553 |
| SCAP       | 0.064553 |
| TOMM70     | 0.064538 |
| AC115522.1 | 0.064522 |
| CEP85      | 0.064518 |
| RPL35A     | 0.064445 |
| KCNE3      | 0.064414 |
| DNMT3A     | 0.064378 |
| NKIRAS1    | 0.064369 |
| RNF214     | 0.064323 |
| GALNS      | 0.064314 |
| MAGI1      | 0.064299 |
| MAD2L1     | 0.064278 |
| SCFD2      | 0.064262 |
| GNA11      | 0.064256 |
| CHD4       | 0.064242 |
| SF3A1      | 0.064225 |
| EGLN1      | 0.064211 |
| PLEKHG2    | 0.06419  |
| SCYL1      | 0.064178 |
| PRKAB2     | 0.064165 |
| GRWD1      | 0.064001 |
| NR2F1-AS1  | 0.063983 |
| LSM12P1    | 0.063839 |
| AL139100.1 | 0.063838 |
| H3C10      | 0.063807 |
| HDAC2      | 0.063806 |
| SPON1      | 0.063791 |
| HEBP2      | 0.063757 |
| RTN4       | 0.063731 |
| AL021392.1 | 0.063721 |
| PHB2       | 0.063714 |
| DIP2B      | 0.063711 |
| NAA15      | 0.063664 |
| CDK5R1     | 0.06366  |
| SHCBP1     | 0.063645 |
| BTD        | 0.063633 |
| LEPROT     | 0.063621 |



|            |          |
|------------|----------|
| TOMM20     | 0.063619 |
| MTPN       | 0.063606 |
| CENPV      | 0.063606 |
| SCMH1      | 0.063605 |
| SFXN3      | 0.063521 |
| KIFC3      | 0.063492 |
| CCT8       | 0.063373 |
| CASK       | 0.063361 |
| ZMAT2      | 0.063354 |
| VPS11      | 0.063341 |
| PDIA3      | 0.063314 |
| ITFG1      | 0.063308 |
| GNB1       | 0.063285 |
| SLC35F6    | 0.063255 |
| HIF1A      | 0.063232 |
| PPP1R26    | 0.06321  |
| LIN9       | 0.063197 |
| AL390198.1 | 0.063189 |
| ACTB       | 0.063172 |
| INPPL1     | 0.063155 |
| HMGN1      | 0.063139 |
| YWHAZP4    | 0.063095 |
| LCLAT1     | 0.063094 |
| CRYZL2P    | 0.063084 |
| MAP7D3     | 0.063076 |
| ELAC2      | 0.063072 |
| ANKS1A     | 0.063022 |
| LIAS       | 0.063003 |
| BCKDHA     | 0.062892 |
| NRDC       | 0.062889 |
| FTLP3      | 0.06288  |
| ZKSCAN7    | 0.062862 |
| JMJD6      | 0.062849 |
| TMEM160    | 0.062798 |
| YTHDF2     | 0.062787 |
| DCTD       | 0.062728 |
| LRRC47     | 0.062727 |
| CAB39      | 0.062712 |
| SMIM14     | 0.062708 |
| SLC52A2    | 0.062702 |
| ROBO2      | 0.062681 |
| NIPSNAP2   | 0.062672 |
| LRPAP1     | 0.062657 |
| CCM2L      | 0.062632 |
| PPP3R1     | 0.062621 |
| CENPI      | 0.062556 |
| TOMM40     | 0.062497 |
| PTP4A2     | 0.062469 |
| TBC1D16    | 0.062431 |

|            |          |
|------------|----------|
| MUL1       | 0.062426 |
| LINC02321  | 0.062423 |
| TRAPPC4    | 0.062414 |
| RUSC2      | 0.062405 |
| C22orf46   | 0.062389 |
| MRPS11     | 0.062316 |
| CDCA7      | 0.062293 |
| NOP2       | 0.062287 |
| FBXL15     | 0.06228  |
| MARK2      | 0.062248 |
| DPM2       | 0.062226 |
| UBA52P8    | 0.062212 |
| KLF3       | 0.062202 |
| ATAT1      | 0.062201 |
| FAM86HP    | 0.062165 |
| TMEM39B    | 0.06214  |
| SAP130     | 0.062139 |
| STOX2      | 0.062055 |
| MPST       | 0.062052 |
| NUDT1      | 0.062025 |
| ACP6       | 0.061999 |
| RPL24      | 0.061944 |
| RPL32P18   | 0.061883 |
| TOR1AIP2   | 0.061854 |
| SLAIN2     | 0.061768 |
| MPP3       | 0.06175  |
| MOV10      | 0.061748 |
| SBDSP1     | 0.061704 |
| NT5C       | 0.061699 |
| SMIM15     | 0.061677 |
| AC007182.2 | 0.061635 |
| C1orf116   | 0.061622 |
| AC018868.1 | 0.061609 |
| COG6       | 0.061608 |
| SMC4       | 0.061574 |
| AC084117.1 | 0.061566 |
| MYOZ1      | 0.061551 |
| UBE2Q1     | 0.061463 |
| INPP5F     | 0.061418 |
| ZNF391     | 0.061347 |
| LOXL1      | 0.061321 |
| BUB1       | 0.061321 |
| RNF216     | 0.061307 |
| POM121C    | 0.061267 |
| TFAM       | 0.061206 |
| LMAN2L     | 0.0612   |
| PUS3       | 0.061158 |
| LYSMD1     | 0.061141 |
| RCOR1      | 0.061097 |

|            |          |
|------------|----------|
| BCAS2      | 0.061037 |
| HSF1       | 0.060997 |
| GYS1       | 0.060944 |
| RANGAP1    | 0.060909 |
| PTMAP9     | 0.060885 |
| FAHD2B     | 0.060867 |
| OPA3       | 0.060858 |
| AC046143.1 | 0.060851 |
| NECAB3     | 0.060839 |
| BMS1       | 0.060827 |
| PPFIA1     | 0.060774 |
| POLR2B     | 0.060727 |
| CPLANE2    | 0.060725 |
| ACTR1A     | 0.060672 |
| TM9SF4     | 0.060665 |
| TAGLN2     | 0.060665 |
| DIP2C      | 0.060664 |
| NOSTRIN    | 0.060663 |
| CAMLG      | 0.060622 |
| AL604028.1 | 0.060559 |
| CELSR2     | 0.060549 |
| CEP131     | 0.060517 |
| KDM1B      | 0.060501 |
| CTSD       | 0.060494 |
| TWSG1      | 0.060473 |
| GARS1      | 0.060461 |
| HMGN2P15   | 0.060433 |
| TBC1D13    | 0.060429 |
| SNRPEP11   | 0.060424 |
| AC022211.2 | 0.060423 |
| COA4       | 0.060399 |
| PCDHGB7    | 0.060348 |
| GTPBP2     | 0.060337 |
| AC005229.3 | 0.0603   |
| SYNDIG1    | 0.060292 |
| SCP2       | 0.060279 |
| COIL       | 0.060268 |
| STAMBP     | 0.060264 |
| LARP1      | 0.060225 |
| MORN4      | 0.060224 |
| GNL2       | 0.060171 |
| HEBP1      | 0.060145 |
| AC090589.1 | 0.060126 |
| SEC61A1    | 0.060117 |
| SEC16A     | 0.06008  |
| ZNF850     | 0.060071 |
| MFGE8      | 0.060053 |
| RPS20      | 0.060044 |
| PEX11G     | 0.059987 |

|            |          |
|------------|----------|
| ATP6V0C    | 0.059909 |
| EMC7       | 0.059884 |
| FOXD2-AS1  | 0.059858 |
| RPL38      | 0.059848 |
| FANCI      | 0.059841 |
| AL031985.3 | 0.059825 |
| PIGZ       | 0.059816 |
| SPART      | 0.059808 |
| PRRC1      | 0.059793 |
| CAP1       | 0.059786 |
| RABGEF1    | 0.059753 |
| HNRNPA1    | 0.059739 |
| PIK3C2B    | 0.059583 |
| WDR24      | 0.059582 |
| ERBB3      | 0.059531 |
| PBX2       | 0.059518 |
| NUS1P1     | 0.059451 |
| YIPF1      | 0.05944  |
| SULT2B1    | 0.059439 |
| TMEM53     | 0.059409 |
| CIZ1       | 0.059396 |
| ZFAND6     | 0.059386 |
| PLK4       | 0.059378 |
| HMGN1P38   | 0.059319 |
| ZNF212     | 0.059309 |
| C1orf43    | 0.059295 |
| ATG101     | 0.059261 |
| KCNS3      | 0.059201 |
| ITSN1      | 0.059191 |
| FEN1       | 0.059147 |
| GFPT1      | 0.059097 |
| NIFK       | 0.059095 |
| SLC41A3    | 0.059063 |
| SUV39H1    | 0.05903  |
| TAPT1-AS1  | 0.059019 |
| TMX2       | 0.058979 |
| NCAPH      | 0.058973 |
| EIF2B2     | 0.058973 |
| LLGL2      | 0.05892  |
| SEMA6B     | 0.058915 |
| ZDHHC18    | 0.058906 |
| TMEM115    | 0.058891 |
| TPRA1      | 0.058865 |
| KLHL12     | 0.058861 |
| CCDC102A   | 0.058832 |
| PLPPR2     | 0.058791 |
| SKI        | 0.058749 |
| SUGT1      | 0.058696 |
| AC022007.1 | 0.058694 |

|            |          |
|------------|----------|
| PUM1       | 0.058692 |
| TGOLN2     | 0.058663 |
| PSMD5      | 0.0586   |
| ELF3       | 0.058595 |
| MAP2K4     | 0.05858  |
| ATP6AP1L   | 0.058548 |
| FRMD5      | 0.058486 |
| ZIK1       | 0.058482 |
| EIF1AD     | 0.05847  |
| NOD1       | 0.058462 |
| NDUFA12    | 0.058441 |
| CYB5R2     | 0.058434 |
| PNPLA4     | 0.058426 |
| SHROOM2    | 0.058403 |
| MSH6       | 0.058372 |
| ATG10      | 0.05836  |
| RPL41P5    | 0.058323 |
| ITGBL1     | 0.05832  |
| AL121820.2 | 0.058243 |
| UBE2I      | 0.058241 |
| SASS6      | 0.058224 |
| GHITM      | 0.058215 |
| RNF168     | 0.058189 |
| SLC35A1    | 0.058178 |
| AC106795.1 | 0.05816  |
| YWHAQ      | 0.058156 |
| AASDH      | 0.058075 |
| GOLM2      | 0.058071 |
| ANKH       | 0.057941 |
| SUFU       | 0.057916 |
| DDX23      | 0.057909 |
| TMEM81     | 0.057906 |
| IPO8       | 0.057859 |
| DM1-AS     | 0.057852 |
| RREB1      | 0.05784  |
| TRIAP1     | 0.057813 |
| PCLAF      | 0.05776  |
| PDZD4      | 0.057751 |
| FAM8A1     | 0.057746 |
| SNORD36C   | 0.05772  |
| VPS25      | 0.057674 |
| TOE1       | 0.057673 |
| AC099560.2 | 0.057667 |
| DYNC1I2    | 0.057658 |
| PPP1R16A   | 0.057657 |
| DUT        | 0.057643 |
| PLPP2      | 0.05763  |
| SURF4      | 0.057596 |
| CRACD      | 0.057573 |

|            |          |
|------------|----------|
| MAST4      | 0.057553 |
| SUMO2      | 0.057526 |
| E2F6       | 0.057486 |
| GHDC       | 0.057475 |
| CDC27      | 0.05745  |
| AAGAB      | 0.057407 |
| AC243919.1 | 0.057389 |
| PTRHD1     | 0.057389 |
| GNL3       | 0.057379 |
| NOMO1      | 0.05737  |
| PLAG1      | 0.057363 |
| KDELRL1    | 0.057333 |
| EIF4EBP3   | 0.057323 |
| WWTR1      | 0.057285 |
| PPP4R1     | 0.057274 |
| AURKB      | 0.057265 |
| PGRMC2     | 0.057256 |
| RAD18      | 0.057204 |
| CENPK      | 0.057158 |
| ETFA       | 0.057148 |
| KIF1B      | 0.057144 |
| MED15      | 0.057135 |
| LMBR1      | 0.057115 |
| IPO7       | 0.057093 |
| SPRYD3     | 0.057027 |
| TRIM24     | 0.057011 |
| HROB       | 0.056994 |
| PFKFB4     | 0.056985 |
| CTH        | 0.056977 |
| PEX19      | 0.05696  |
| CD1A       | 0.056953 |
| SMIM10     | 0.056888 |
| ARNT       | 0.056874 |
| THAP7      | 0.056859 |
| CASTOR3    | 0.056842 |
| RPA3       | 0.0568   |
| RASSF8-AS1 | 0.056733 |
| INPP5K     | 0.056722 |
| FP565260.1 | 0.056642 |
| NMT1       | 0.056628 |
| TGFBR1     | 0.056607 |
| MT1DP      | 0.056599 |
| SERTAD2    | 0.056595 |
| RNF7       | 0.056592 |
| PHLDB1     | 0.056588 |
| DNAJC21    | 0.056462 |
| TMEM184C   | 0.056453 |
| PPP2R2A    | 0.056442 |
| AJM1       | 0.056425 |

|            |          |
|------------|----------|
| UBFD1      | 0.056413 |
| GMEB2      | 0.0564   |
| SINHCAF    | 0.056392 |
| CNTN3      | 0.056295 |
| SENP1      | 0.056223 |
| BTRC       | 0.056174 |
| WBP1L      | 0.056173 |
| TMEM25     | 0.056169 |
| NSFL1C     | 0.056143 |
| SLC4A2     | 0.056118 |
| METAP1     | 0.056094 |
| SUCLG2     | 0.056071 |
| POLM       | 0.056071 |
| UQCRQ      | 0.056069 |
| SEM1       | 0.056027 |
| GUK1       | 0.056002 |
| SPATA20    | 0.055987 |
| INSYN2A    | 0.055979 |
| TMEM44-AS1 | 0.055969 |
| PFAS       | 0.055968 |
| TBCC       | 0.055955 |
| BCOR       | 0.055954 |
| SLC38A10   | 0.055938 |
| BRIP1      | 0.055924 |
| HAT1       | 0.055876 |
| AL591846.1 | 0.055871 |
| RTN2       | 0.055844 |
| IARS2      | 0.055833 |
| CRIP1      | 0.055801 |
| TSG101     | 0.055766 |
| VDR        | 0.055727 |
| RAB1A      | 0.055722 |
| MRPL47     | 0.055721 |
| WARS2      | 0.055708 |
| SZRD1      | 0.055691 |
| UGT1A6     | 0.055667 |
| EEF1A1P4   | 0.055625 |
| ECHS1      | 0.055605 |
| LIG3       | 0.055596 |
| PFDN1      | 0.055575 |
| ATL3       | 0.055573 |
| MYO5B      | 0.055477 |
| MEST       | 0.05543  |
| KLHL23     | 0.055396 |
| CDC42BPA   | 0.055349 |
| RPL23AP42  | 0.055306 |
| ANP32B     | 0.05528  |
| TLNRD1     | 0.055274 |
| HMGCR      | 0.055189 |

|            |          |
|------------|----------|
| CCDC127    | 0.055168 |
| AIDA       | 0.055143 |
| STYXL1     | 0.055143 |
| LRRC57     | 0.055134 |
| RWDD2B     | 0.055122 |
| CTDSP1     | 0.055075 |
| NSA2       | 0.055067 |
| NQO2       | 0.055029 |
| PYROXD1    | 0.055023 |
| ZMIZ2      | 0.055002 |
| WBP2       | 0.054996 |
| ANO8       | 0.054972 |
| COQ3       | 0.054959 |
| FAM20B     | 0.054941 |
| UBE2D3P1   | 0.054897 |
| CCNDBP1    | 0.054895 |
| PGRMC1     | 0.054857 |
| HMGB1P10   | 0.054856 |
| TCAF1      | 0.05484  |
| PLEKHG3    | 0.054717 |
| SEPTIN2    | 0.054715 |
| SCD        | 0.054693 |
| MORC2      | 0.054654 |
| NCK2       | 0.054642 |
| SMIM10L2B  | 0.054635 |
| MRPS9      | 0.054634 |
| MRPS21     | 0.054613 |
| ZNF408     | 0.054596 |
| CDK5       | 0.054592 |
| NELFB      | 0.054589 |
| TNNC2      | 0.054589 |
| FUT4       | 0.054587 |
| RPL23AP7   | 0.05455  |
| ZNF184     | 0.054494 |
| MYO1B      | 0.054494 |
| GPBP1L1    | 0.054384 |
| C6orf136   | 0.05434  |
| MED11      | 0.05431  |
| AL035661.1 | 0.054295 |
| SCO1       | 0.054292 |
| PCCB       | 0.054228 |
| KHSRP      | 0.054204 |
| HK2-DT     | 0.05418  |
| GLIS3      | 0.054175 |
| CTDNEP1    | 0.054149 |
| SOX18      | 0.054147 |
| THOC7      | 0.054141 |
| PHF13      | 0.054133 |
| MKNK2      | 0.05413  |



|            |          |
|------------|----------|
| AQR        | 0.054129 |
| SLC20A2    | 0.05409  |
| GOLGA7     | 0.054087 |
| TRUB1      | 0.054081 |
| PPP2R5A    | 0.054067 |
| ASB6       | 0.054066 |
| DNAJB6     | 0.054058 |
| NMRAL1     | 0.054037 |
| UBE2V2     | 0.053992 |
| AP003068.2 | 0.053922 |
| RAB11B-AS1 | 0.053921 |
| ST13       | 0.053906 |
| SRM        | 0.053875 |
| ENSA       | 0.053842 |
| TRDMT1     | 0.05381  |
| C19orf48   | 0.053796 |
| CEBPB      | 0.053754 |
| FN3KRP     | 0.053746 |
| FOXD3-AS1  | 0.053708 |
| CHMP2A     | 0.053692 |
| AL365436.1 | 0.053687 |
| CIB1       | 0.053673 |
| DNAJC5     | 0.053664 |
| NFS1       | 0.053658 |
| TRMT10A    | 0.053632 |
| PLD6       | 0.053615 |
| B3GNT8     | 0.053607 |
| UBL3       | 0.053536 |
| URM1       | 0.053488 |
| HEG1       | 0.053432 |
| DDIAS      | 0.053413 |
| ZMYND19    | 0.053399 |
| MAP3K21    | 0.053362 |
| ANKRD24    | 0.053361 |
| TAF15      | 0.053356 |
| STK40      | 0.053347 |
| MPP5       | 0.05334  |
| ABITRAM    | 0.053325 |
| NDUFB10    | 0.053295 |
| CETN3      | 0.053254 |
| NUP62CL    | 0.053242 |
| MRPL43     | 0.053224 |
| MRPL11     | 0.053205 |
| URB1       | 0.053197 |
| PCBP2      | 0.053195 |
| KLHL35     | 0.053173 |
| ZNF219     | 0.053139 |
| GLG1       | 0.053073 |
| INTS3      | 0.05305  |

|            |          |
|------------|----------|
| POM121     | 0.053038 |
| ZSCAN9     | 0.053025 |
| PPP2CA     | 0.053013 |
| ATP2A2     | 0.053002 |
| RPL41      | 0.053    |
| RBM47      | 0.052988 |
| RETREG2    | 0.052952 |
| CTSA       | 0.052946 |
| SLC16A9    | 0.052911 |
| RAB35      | 0.052906 |
| TSPAN10    | 0.052895 |
| AL713899.1 | 0.05289  |
| PAM        | 0.052811 |
| CENPF      | 0.052807 |
| GLB1L2     | 0.052752 |
| IGFBP5     | 0.05274  |
| ADAMTS14   | 0.052719 |
| CDC42EP4   | 0.052692 |
| MEX3B      | 0.052668 |
| STOML1     | 0.052641 |
| WWC3       | 0.052613 |
| ZNF768     | 0.052601 |
| CAP1P1     | 0.052575 |
| ATP5MC1    | 0.052554 |
| BACH1      | 0.052534 |
| SMURF2     | 0.05252  |
| ELOVL2     | 0.052496 |
| AGPS       | 0.052415 |
| CRB3       | 0.0524   |
| IQCE       | 0.052368 |
| PDCD6IP    | 0.052367 |
| AC024941.2 | 0.052339 |
| AC016355.1 | 0.052335 |
| MED18      | 0.052327 |
| AC079145.1 | 0.052277 |
| AP001469.3 | 0.052249 |
| VPS45      | 0.052247 |
| AC009686.2 | 0.052236 |
| U47924.3   | 0.052206 |
| GTF2E1     | 0.052202 |
| ZNF213     | 0.052173 |
| RPS7P11    | 0.052166 |
| SULF2      | 0.052161 |
| GPD1L      | 0.052161 |
| CD2AP      | 0.052135 |
| C18orf54   | 0.052134 |
| CANX       | 0.052044 |
| TSTD1      | 0.052043 |
| PYM1       | 0.052026 |

|           |          |
|-----------|----------|
| LINC02861 | 0.051959 |
| PLA2G4E   | 0.051886 |
| SF3B2     | 0.051866 |
| SRP14     | 0.051857 |
| FLJ20021  | 0.05184  |
| SRPRA     | 0.051819 |
| ABHD11    | 0.05179  |
| CRTAP     | 0.051784 |
| FNBP1L    | 0.051774 |
| UROS      | 0.051759 |
| SLC30A9   | 0.051741 |
| PPIB      | 0.051711 |
| HMGCL     | 0.051696 |
| TRIM59    | 0.05168  |
| DNAJC9    | 0.051656 |
| ITGB6     | 0.051634 |
| PCDH18    | 0.051627 |
| TBCCD1    | 0.051613 |
| IWS1      | 0.05161  |
| STRN4     | 0.05161  |
| TFAP4     | 0.0516   |
| CTU1      | 0.051571 |
| NAA50     | 0.051559 |
| SLC37A1   | 0.051555 |
| OAZ2      | 0.051496 |
| TMTC3     | 0.051475 |
| NR4A2     | 0.051472 |
| RFK       | 0.05147  |
| OCRL      | 0.051451 |
| KCTD20    | 0.051439 |
| ATPAF1    | 0.051419 |
| GFM1      | 0.051371 |
| POP5      | 0.051368 |
| SEC22A    | 0.051339 |
| FPGS      | 0.051311 |
| HAUS2     | 0.051291 |
| METTL5    | 0.051252 |
| AJUBA     | 0.05125  |
| TRAIP     | 0.051237 |
| CCM2      | 0.051219 |
| SLC37A4   | 0.05121  |
| POLB      | 0.051177 |
| FKBP1A    | 0.051167 |
| ALCAM     | 0.051131 |
| FAF1      | 0.051108 |
| RPL23     | 0.051009 |
| HELZ2     | 0.051008 |
| UBE2J2    | 0.050984 |
| ERMP1     | 0.050935 |

|           |          |
|-----------|----------|
| ATG12     | 0.050911 |
| POLR1B    | 0.050911 |
| SLC41A1   | 0.050851 |
| FOXJ2     | 0.050821 |
| PSMB7     | 0.050793 |
| TP53      | 0.050785 |
| TMPRSS4   | 0.050753 |
| ZBTB7A    | 0.050724 |
| SMG7      | 0.050712 |
| PSMC3IP   | 0.050708 |
| FAM89B    | 0.050672 |
| CUEDC1    | 0.050671 |
| CENPS     | 0.050658 |
| MYZAP     | 0.050639 |
| MRPS15    | 0.050625 |
| SEPTIN5   | 0.05062  |
| PRR34-AS1 | 0.050604 |
| RYK       | 0.050555 |
| MLX       | 0.050534 |
| NCDN      | 0.050533 |
| TCF19     | 0.050523 |
| SLC38A9   | 0.050514 |
| ITPRIP    | 0.050505 |
| EZR       | 0.050485 |
| C7orf26   | 0.05042  |
| ZHX3      | 0.050414 |
| RRNAD1    | 0.050387 |
| DECR2     | 0.050377 |
| C9orf40   | 0.050371 |
| ARSK      | 0.050338 |
| SPSB1     | 0.050296 |
| SDSL      | 0.050175 |
| TPRN      | 0.050154 |
| SNRPD3    | 0.05013  |
| BLOC1S5   | 0.050085 |
| LRRN4CL   | 0.050074 |
| MRPS22    | 0.050047 |
| GET4      | 0.050037 |
| UBE3B     | 0.050035 |
| RPS28P7   | 0.050004 |
| DENND10   | 0.049984 |
| RAD54L    | 0.049976 |
| ATP11A    | 0.049966 |
| TRIP4     | 0.049963 |
| BOD1      | 0.049944 |
| ZNF22-AS1 | 0.04994  |
| RPL23AP82 | 0.04993  |
| EXOC4     | 0.049912 |
| PAQR6     | 0.049901 |

|            |          |
|------------|----------|
| FAM98B     | 0.049885 |
| ZNF319     | 0.049884 |
| INKA2      | 0.049878 |
| DKC1       | 0.049839 |
| EPOP       | 0.049834 |
| CX3CR1     | 0.049826 |
| SART1      | 0.049741 |
| SVBP       | 0.0497   |
| KIAA0100   | 0.049691 |
| ZSCAN21    | 0.049689 |
| ZNF526     | 0.049653 |
| DCUN1D4    | 0.04965  |
| APP        | 0.04964  |
| RPS18P9    | 0.049581 |
| CENPE      | 0.049563 |
| NME1       | 0.049547 |
| DLAT       | 0.049537 |
| USP14      | 0.049503 |
| YWHAZ      | 0.049485 |
| ERCC1      | 0.049464 |
| GRHL2      | 0.049455 |
| RASAL2     | 0.049411 |
| RPL11      | 0.049402 |
| MT1F       | 0.049401 |
| EMC3       | 0.0494   |
| NGFR       | 0.049386 |
| BACE1-AS   | 0.049335 |
| DNAJA3     | 0.049328 |
| PITPNA     | 0.049307 |
| SUPV3L1    | 0.049279 |
| EFTUD2     | 0.049242 |
| RNF152     | 0.049238 |
| CACUL1     | 0.049228 |
| C3         | 0.049123 |
| RPF1       | 0.0491   |
| ZKSCAN1    | 0.049073 |
| IP6K1      | 0.049034 |
| SIVA1      | 0.049033 |
| C12orf57   | 0.049023 |
| MTRR       | 0.048994 |
| PDF        | 0.048951 |
| SLK        | 0.048929 |
| AC072052.1 | 0.048921 |
| DYNC2I2    | 0.0489   |
| SNHG16     | 0.048861 |
| RAB40B     | 0.048855 |
| NUDT17     | 0.048832 |
| ATP6V1FNB  | 0.048831 |
| CNPY2      | 0.048829 |

|            |          |
|------------|----------|
| ACER2      | 0.04881  |
| C1orf35    | 0.048807 |
| AC036214.2 | 0.048795 |
| MEF2D      | 0.048776 |
| BUD23      | 0.048766 |
| PCDHB5     | 0.048759 |
| GNPDA2     | 0.048749 |
| UTP4       | 0.048744 |
| NOP10      | 0.048738 |
| NACC2      | 0.048735 |
| TMEM87B    | 0.048715 |
| POLE3      | 0.048698 |
| ERP29      | 0.048696 |
| CCDC24     | 0.048692 |
| NUCKS1     | 0.048687 |
| ESR1       | 0.048674 |
| COX19      | 0.048612 |
| PFKFB3     | 0.048586 |
| FLYWCH2    | 0.048582 |
| GALNT5     | 0.048547 |
| TTC3P1     | 0.048506 |
| SSC5D      | 0.048506 |
| ZFAND2A-DT | 0.048492 |
| NCBP2AS2   | 0.048474 |
| LINC00638  | 0.048473 |
| SLC35D2    | 0.048408 |
| ZMYM4      | 0.048397 |
| CTBP1      | 0.048384 |
| RPL35P5    | 0.048383 |
| ARPIN      | 0.04836  |
| DESI2      | 0.048349 |
| THOC5      | 0.048349 |
| YBEY       | 0.048267 |
| TMCO4      | 0.048259 |
| AC092368.3 | 0.048251 |
| COX7C      | 0.048249 |
| NIT1       | 0.048246 |
| GATAD2B    | 0.048242 |
| LZTS1      | 0.048202 |
| TIGD6      | 0.048191 |
| KLF10      | 0.048175 |
| SMARCC2    | 0.048173 |
| MMP24OS    | 0.048123 |
| MRPL4      | 0.048079 |
| AHCYL1     | 0.048043 |
| RNF4       | 0.048023 |
| LPCAT1     | 0.047991 |
| RAB11FIP1  | 0.047961 |
| LDHAP7     | 0.047921 |

|            |          |
|------------|----------|
| PEF1       | 0.047889 |
| AL157838.1 | 0.047871 |
| HID1       | 0.047862 |
| SHARPIN    | 0.047821 |
| DCUN1D5    | 0.047817 |
| BCL2L1     | 0.047814 |
| SEPTIN8    | 0.047796 |
| COPZ2      | 0.047769 |
| AL158801.4 | 0.047737 |
| MEN1       | 0.047725 |
| NUDC       | 0.047682 |
| DUSP8      | 0.047655 |
| ERMAP      | 0.047646 |
| AC087741.3 | 0.047602 |
| KBTBD11    | 0.047556 |
| TBC1D10B   | 0.047556 |
| WASH3P     | 0.047548 |
| RHBDD2     | 0.047536 |
| PNO1       | 0.047527 |
| TIPARP-AS1 | 0.047519 |
| BANF1      | 0.047508 |
| STT3B      | 0.0475   |
| LSM12      | 0.047487 |
| TMUB1      | 0.047462 |
| TYW1B      | 0.047448 |
| CTTNBP2NL  | 0.047435 |
| CCDC8      | 0.047424 |
| AC011294.1 | 0.047418 |
| NBR1       | 0.047408 |
| GSK3A      | 0.047404 |
| NT5C3B     | 0.047395 |
| SH3RF1     | 0.047373 |
| WIPF2      | 0.047345 |
| AP002761.1 | 0.047342 |
| ACTRT3     | 0.0473   |
| EXOSC10    | 0.047299 |
| RTCA       | 0.047284 |
| PCBP1      | 0.047217 |
| PIM3       | 0.047205 |
| SEC23IP    | 0.047195 |
| AP2S1      | 0.047185 |
| METTL16    | 0.047132 |
| SIPA1L1    | 0.047128 |
| GPRASP2    | 0.047116 |
| STK19      | 0.047109 |
| RPL26L1    | 0.047099 |
| SLC12A9    | 0.047095 |
| GNAI3      | 0.04708  |
| HOPX       | 0.047043 |

|            |          |
|------------|----------|
| RPS6KA2    | 0.04703  |
| PTBP1      | 0.046964 |
| RAPGEFL1   | 0.046923 |
| LDLRAP1    | 0.046918 |
| ACVR2B     | 0.046916 |
| CWC22      | 0.046898 |
| HHIP-AS1   | 0.046895 |
| GPN3       | 0.046887 |
| DAXX       | 0.04688  |
| H2AZ2      | 0.046873 |
| RPL41P1    | 0.04687  |
| SNX8       | 0.046867 |
| NDST1      | 0.046812 |
| NPRL3      | 0.04677  |
| ADCY6      | 0.046714 |
| DNAJC17    | 0.046689 |
| SRPK3      | 0.046673 |
| TBC1D8B    | 0.046656 |
| ACLY       | 0.046625 |
| ANKRD52    | 0.046562 |
| AQP9       | 0.046532 |
| SIRT5      | 0.046487 |
| C19orf71   | 0.046475 |
| NDUFS4     | 0.046415 |
| MTCO2P2    | 0.046401 |
| GCHFR      | 0.046342 |
| ASPM       | 0.046313 |
| MAP3K11    | 0.046311 |
| MOCOS      | 0.0463   |
| LRFN3      | 0.04628  |
| FAM174C    | 0.046277 |
| BEND3      | 0.046253 |
| TMEM161A   | 0.04623  |
| MSH3       | 0.046225 |
| ARHGDI1A   | 0.046199 |
| EGLN3      | 0.046192 |
| KDR        | 0.046154 |
| FDXACB1    | 0.04612  |
| SPDYE12P   | 0.046044 |
| SLC20A1    | 0.046026 |
| AC098487.1 | 0.046023 |
| HCG15      | 0.04602  |
| AC012306.2 | 0.045966 |
| B4GAT1     | 0.045929 |
| FAAP100    | 0.045912 |
| RAB3GAP1   | 0.045887 |
| ANKIB1     | 0.045885 |
| GINM1      | 0.045851 |
| TNFRSF10B  | 0.045808 |



|            |          |
|------------|----------|
| ICA1       | 0.045786 |
| TLN2       | 0.045766 |
| ICAM1      | 0.045759 |
| POC1A      | 0.045759 |
| MPLKIP     | 0.045757 |
| AC024896.1 | 0.045726 |
| HNRNPA3P6  | 0.045723 |
| GNG5       | 0.045631 |
| ATXN10     | 0.04561  |
| CDKN2AIPNL | 0.045606 |
| EIF3D      | 0.045603 |
| B4GALT3    | 0.045589 |
| KTI12      | 0.045572 |
| VWA1       | 0.045552 |
| AL162511.1 | 0.045548 |
| ZDHHC8     | 0.045543 |
| NBAS       | 0.045539 |
| MYOM1      | 0.045469 |
| GJB6       | 0.045464 |
| AL354836.1 | 0.045387 |
| CEBPZOS    | 0.045331 |
| CAND2      | 0.045316 |
| PGM3       | 0.045274 |
| SMC2       | 0.045273 |
| TMEM201    | 0.045131 |
| GLUD1      | 0.045119 |
| ETS2       | 0.045116 |
| MAP3K7CL   | 0.045114 |
| GIN53      | 0.045088 |
| GTF2H3     | 0.045083 |
| PPT1       | 0.044983 |
| KCTD10     | 0.044903 |
| KANK2      | 0.044901 |
| SLC35B4    | 0.044846 |
| UBAC2      | 0.044842 |
| EIF2B4     | 0.044829 |
| RAB7A      | 0.044829 |
| RINT1      | 0.04482  |
| AC090114.1 | 0.044768 |
| ACTG1P20   | 0.044764 |
| SLC25A24   | 0.04474  |
| ZNHIT2     | 0.044691 |
| CASP2      | 0.04466  |
| NSD2       | 0.044625 |
| MEIS2      | 0.04462  |
| PGAM5      | 0.044585 |
| GOLT1A     | 0.044583 |
| TTI1       | 0.044563 |
| ENO3       | 0.044541 |

|            |          |
|------------|----------|
| N4BP1      | 0.044538 |
| ECPAS      | 0.0445   |
| EFHD2      | 0.044499 |
| VPS33A     | 0.044492 |
| TFIP11     | 0.044466 |
| DHX29      | 0.044458 |
| MST1       | 0.044453 |
| DUSP12     | 0.044447 |
| FEZF1-AS1  | 0.044416 |
| ASB7       | 0.044392 |
| PRDM4      | 0.044368 |
| RPS24      | 0.044368 |
| TSPAN14    | 0.044345 |
| PAFAH1B1   | 0.044292 |
| RFC1       | 0.044279 |
| RXRB       | 0.044245 |
| BSDC1      | 0.044232 |
| NUAK1      | 0.044221 |
| IKBKG      | 0.044162 |
| MICB       | 0.044142 |
| U47924.2   | 0.044136 |
| NR4A1      | 0.044132 |
| DNAJC25    | 0.044109 |
| IGBP1      | 0.044052 |
| RNF10      | 0.04405  |
| ARMCX2     | 0.044036 |
| DUSP13     | 0.044023 |
| KPNB1      | 0.043993 |
| DESI1      | 0.043973 |
| RSRC1      | 0.04396  |
| RNPEPL1    | 0.043958 |
| C1orf159   | 0.043954 |
| VPS9D1-AS1 | 0.04391  |
| ZNF501     | 0.043891 |
| TAF11      | 0.043849 |
| AL078644.1 | 0.043842 |
| GID8       | 0.04384  |
| COX15      | 0.043807 |
| MFSD11     | 0.043789 |
| KLHL26     | 0.04378  |
| UBN1       | 0.043756 |
| CWC27      | 0.043731 |
| H3P6       | 0.043725 |
| BRK1       | 0.043634 |
| HADHB      | 0.043629 |
| CST3       | 0.043623 |
| PPIF       | 0.043616 |
| CHMP3      | 0.043604 |
| ARFGAP1    | 0.043602 |

|           |          |
|-----------|----------|
| SEH1L     | 0.043573 |
| CC2D1B    | 0.04357  |
| CHASERR   | 0.043545 |
| KHDRBS1   | 0.043543 |
| NCBP3     | 0.043518 |
| INA       | 0.043506 |
| TTC1      | 0.043494 |
| TMED1     | 0.043453 |
| UBE2L3    | 0.043453 |
| BCAP29    | 0.043417 |
| EIF4EBP2  | 0.043414 |
| GOLGA3    | 0.043407 |
| SCAMP4    | 0.043406 |
| SHTN1     | 0.043383 |
| SSU72     | 0.043381 |
| C1GALT1   | 0.043363 |
| RAD1      | 0.043318 |
| RRAS      | 0.043313 |
| CRIM1     | 0.043277 |
| DAW1      | 0.043263 |
| HNRNPAB   | 0.043252 |
| APEH      | 0.043251 |
| FASTKD3   | 0.043204 |
| EFCAB14   | 0.043168 |
| PCGF1     | 0.043131 |
| USP19     | 0.043119 |
| BAIAP2-DT | 0.043047 |
| MAP6D1    | 0.043041 |
| PRR12     | 0.043032 |
| SLC17A5   | 0.043018 |
| SSB       | 0.042995 |
| SEMA4C    | 0.042956 |
| WDR36     | 0.042944 |
| MED8      | 0.042919 |
| GLO1      | 0.042899 |
| IL17D     | 0.042892 |
| CNOT2     | 0.04288  |
| QPCTL     | 0.042857 |
| USP44     | 0.042809 |
| MRPL15    | 0.042808 |
| COPS8     | 0.042807 |
| ETF1      | 0.042772 |
| PNPO      | 0.042771 |
| PFDN6     | 0.042741 |
| ADH5      | 0.04274  |
| HS6ST2    | 0.042729 |
| CLCN2     | 0.042701 |
| SLC40A1   | 0.0427   |
| RAB6A     | 0.04268  |

|              |          |
|--------------|----------|
| NUDT16L1     | 0.042674 |
| BCAR4        | 0.042666 |
| HNRNPA0      | 0.042596 |
| PRPF19       | 0.042587 |
| TMEM45A      | 0.042578 |
| ARMC6        | 0.042578 |
| DDOST        | 0.042574 |
| COG5         | 0.042532 |
| IPP          | 0.042526 |
| YBX1P1       | 0.042436 |
| CUL2         | 0.042414 |
| TRAPPC12-AS1 | 0.042385 |
| ATP5IF1      | 0.04238  |
| FLOT1        | 0.042351 |
| XDH          | 0.04232  |
| C1orf216     | 0.042276 |
| NR1H2        | 0.04227  |
| SRA1         | 0.042259 |
| UBIAD1       | 0.042251 |
| SCNM1        | 0.042242 |
| RBM8A        | 0.042236 |
| SLC39A13     | 0.042231 |
| BCL2L12      | 0.042223 |
| FAM120A      | 0.042213 |
| AP001453.2   | 0.042197 |
| XRCC5        | 0.042173 |
| ACO2         | 0.042154 |
| ANXA11       | 0.042151 |
| XXYLT1       | 0.042148 |
| COX17P1      | 0.042137 |
| SIAE         | 0.042112 |
| EEF2         | 0.042066 |
| DHDDS        | 0.042042 |
| B4GALT6      | 0.041992 |
| CARD11       | 0.041967 |
| POT1         | 0.041955 |
| MAFG-DT      | 0.04195  |
| SGMS1-AS1    | 0.041926 |
| CZIB         | 0.041922 |
| COA8         | 0.041921 |
| IFT22        | 0.041889 |
| HMMR         | 0.041878 |
| RPSA         | 0.041861 |
| SELENOF      | 0.041849 |
| RNF25        | 0.041847 |
| SREBF2       | 0.041846 |
| EIF2B3       | 0.041836 |
| NUP205       | 0.041826 |
| POLR3C       | 0.041731 |

|            |          |
|------------|----------|
| THAP4      | 0.041702 |
| PRPF38A    | 0.041659 |
| USB1       | 0.041654 |
| GTF2F2     | 0.041645 |
| MTA3       | 0.041594 |
| TPRG1L     | 0.041593 |
| GIPC1      | 0.041583 |
| PAPPA      | 0.04156  |
| MAP3K13    | 0.041556 |
| C1orf198   | 0.041522 |
| EIF3C      | 0.041514 |
| SESN2      | 0.041465 |
| DARS2      | 0.041429 |
| NMNAT1     | 0.041424 |
| AC108134.1 | 0.041404 |
| GNPTG      | 0.041392 |
| CCDC115    | 0.041383 |
| MTAP       | 0.041378 |
| AP005482.2 | 0.04134  |
| GIT1       | 0.041339 |
| AFMID      | 0.041325 |
| GPX4       | 0.041318 |
| CDC73      | 0.041207 |
| CUEDC2     | 0.041192 |
| UQCRHL     | 0.041178 |
| SNX12      | 0.041167 |
| PRPF40A    | 0.041151 |
| STK17A     | 0.041136 |
| TRAPPC3    | 0.041124 |
| AC011676.1 | 0.041098 |
| FAM13A     | 0.041081 |
| MTREX      | 0.041081 |
| ZNF595     | 0.041073 |
| PRPF4      | 0.041072 |
| SNAPC1     | 0.041015 |
| ARSJ       | 0.041002 |
| NRAS       | 0.040966 |
| CCDC90B    | 0.040826 |
| KRTCAP2    | 0.040809 |
| TFB2M      | 0.040763 |
| CHCHD1     | 0.040755 |
| ZNF512B    | 0.040713 |
| LAMTOR1    | 0.040709 |
| KDM4A      | 0.040704 |
| STAU1      | 0.040699 |
| CDC42EP1   | 0.040688 |
| SPPL3      | 0.04065  |
| UROD       | 0.040621 |
| MORC4      | 0.0406   |

|           |          |
|-----------|----------|
| MIER2     | 0.040592 |
| MEMO1P1   | 0.040589 |
| TMEM43    | 0.040587 |
| ZNF771    | 0.040571 |
| PIP4K2C   | 0.040563 |
| ITPKC     | 0.040551 |
| PTPN23    | 0.040477 |
| RNF139    | 0.040456 |
| ZBED6CL   | 0.040452 |
| C6orf47   | 0.040444 |
| SUCLA2    | 0.040404 |
| CBLL1     | 0.040401 |
| FAM241B   | 0.040279 |
| ALDH4A1   | 0.040246 |
| RAB5A     | 0.040199 |
| PRR36     | 0.040178 |
| NOMO3     | 0.040155 |
| RAB20     | 0.04008  |
| BTBD1     | 0.040077 |
| COSMOC    | 0.040045 |
| MAML3     | 0.03996  |
| GATAD2A   | 0.039914 |
| NEMP1     | 0.039913 |
| FADS2     | 0.039714 |
| PRMT5     | 0.039701 |
| ARHGEF2   | 0.039698 |
| TAF9      | 0.039694 |
| ARHGEF40  | 0.039684 |
| TMEM183A  | 0.039681 |
| PARG      | 0.039676 |
| CASC15    | 0.039622 |
| PSMC3     | 0.039589 |
| NDUFAF8   | 0.039576 |
| SLC25A6   | 0.039566 |
| SND1      | 0.039539 |
| GANAB     | 0.039508 |
| ACO1      | 0.039428 |
| TFAP2C    | 0.039425 |
| DUS1L     | 0.039409 |
| JDP2      | 0.039398 |
| WDR41     | 0.03939  |
| UNC5B-AS1 | 0.039389 |
| TIPRL     | 0.039381 |
| CMTM3     | 0.039362 |
| GJA1      | 0.039361 |
| ZMIZ1     | 0.039354 |
| ARHGAP40  | 0.03935  |
| RAB2A     | 0.039343 |
| KLF16     | 0.039337 |

|            |          |
|------------|----------|
| DNM1       | 0.039337 |
| BAP1       | 0.039324 |
| C3orf33    | 0.039289 |
| PRKAG1     | 0.039283 |
| PRELID3B   | 0.039278 |
| TLE5       | 0.039254 |
| TAF8       | 0.039206 |
| ZNF300     | 0.039187 |
| CLTC       | 0.039165 |
| TBX3       | 0.039162 |
| TMCO1      | 0.039148 |
| PPP2R1A    | 0.039143 |
| C16orf91   | 0.039104 |
| MRPL46     | 0.039073 |
| NFE2L1     | 0.03906  |
| RAB3A      | 0.039032 |
| IMMT       | 0.039029 |
| BMPR1A     | 0.039016 |
| DHX30      | 0.038996 |
| C12orf43   | 0.038995 |
| CNOT8      | 0.038967 |
| THG1L      | 0.038903 |
| MKRN2      | 0.038881 |
| POLR2H     | 0.038875 |
| COG2       | 0.038852 |
| PHPT1      | 0.038836 |
| RPL35      | 0.038833 |
| TSN        | 0.038827 |
| ZMAT5      | 0.038778 |
| CHCHD2P6   | 0.03872  |
| GLTP       | 0.038686 |
| FARS2      | 0.038677 |
| NR3C1      | 0.038662 |
| EIF2B1     | 0.038586 |
| AL390728.3 | 0.038563 |
| HIF1AN     | 0.038559 |
| VPS50      | 0.038556 |
| NIP7       | 0.038535 |
| NDUFA6     | 0.038516 |
| NAA35      | 0.038512 |
| YIPF2      | 0.038509 |
| DNAH17     | 0.038461 |
| ZNF777     | 0.038452 |
| AL096828.3 | 0.038451 |
| BORA       | 0.038443 |
| RNF167     | 0.038428 |
| GTF3C4     | 0.038417 |
| PTGIS      | 0.038417 |
| SNHG8      | 0.038412 |

|              |          |
|--------------|----------|
| CAPN9        | 0.038409 |
| NECAP1       | 0.038397 |
| NDUFB2-AS1   | 0.038391 |
| EARS2        | 0.038383 |
| LINC00665    | 0.038367 |
| SLC8B1       | 0.038363 |
| TMEM168      | 0.038362 |
| PARD6B       | 0.03836  |
| PLCE1        | 0.03832  |
| FBXO28       | 0.038318 |
| COX20        | 0.038251 |
| PPP2R3A      | 0.038186 |
| MTFR2        | 0.038174 |
| PRELID1      | 0.038109 |
| PICALM       | 0.038108 |
| DDX50        | 0.038099 |
| LRRFIP1      | 0.038021 |
| MAPK1        | 0.038016 |
| SPAST        | 0.038004 |
| IL1RN        | 0.038001 |
| CPE          | 0.037982 |
| TMEM254      | 0.037976 |
| ARL2         | 0.037968 |
| MRPL45       | 0.037954 |
| SQOR         | 0.037911 |
| ATP1A1       | 0.037902 |
| ADPRS        | 0.037898 |
| CAMKK1       | 0.037898 |
| SPTAN1       | 0.037883 |
| CDIPTOSP     | 0.037851 |
| STK16        | 0.03785  |
| MED9         | 0.037797 |
| MOGS         | 0.037766 |
| CYP39A1      | 0.037736 |
| HNRNPK       | 0.037722 |
| CPEB2        | 0.037708 |
| PRPS2        | 0.037702 |
| IARS1        | 0.037647 |
| CLDN10       | 0.037646 |
| PLEKHB2      | 0.037642 |
| GUF1         | 0.037605 |
| AC019080.5   | 0.037562 |
| SP1          | 0.037561 |
| DNAJB2       | 0.037509 |
| ARHGAP31-AS1 | 0.037508 |
| STN1         | 0.037498 |
| PCYT1A       | 0.037475 |
| YBX1P10      | 0.037469 |
| PIK3CB       | 0.037456 |



|            |          |
|------------|----------|
| LEMD1      | 0.037434 |
| ZNHIT3     | 0.037411 |
| SMARCB1    | 0.037408 |
| ETV3       | 0.037384 |
| SSH1       | 0.037383 |
| UCHL3      | 0.037345 |
| ARFRP1     | 0.037339 |
| REEP5      | 0.037314 |
| MAIP1      | 0.037281 |
| PANK1      | 0.037237 |
| GPX7       | 0.037236 |
| UST        | 0.037193 |
| CSDC2      | 0.037182 |
| UFC1       | 0.037168 |
| UBE2E1     | 0.037131 |
| G3BP2      | 0.037111 |
| TP53BP2    | 0.037105 |
| CNTROB     | 0.037094 |
| DXO        | 0.037088 |
| ICE1       | 0.037071 |
| LINC02257  | 0.037025 |
| MAML1      | 0.037016 |
| RNPS1      | 0.036975 |
| SUPT5H     | 0.036952 |
| BUD13      | 0.036912 |
| SORD2P     | 0.036875 |
| DNAJC30    | 0.036862 |
| SORCS2     | 0.036824 |
| CHADL      | 0.036805 |
| UBE2D4     | 0.036798 |
| NCBP2      | 0.036784 |
| RNF128     | 0.036766 |
| CARD19     | 0.036761 |
| LEMD3      | 0.036751 |
| UQCRC2     | 0.036705 |
| CCDC9      | 0.036688 |
| TRMT112    | 0.036646 |
| SAMD5      | 0.036567 |
| AC008760.1 | 0.03653  |
| PRKG1      | 0.036503 |
| SYAP1      | 0.0365   |
| AC009005.1 | 0.036482 |
| CCDC126    | 0.036439 |
| NELFCD     | 0.036422 |
| ORC2       | 0.036418 |
| CNBP       | 0.036385 |
| ABL2       | 0.036365 |
| CCDC47     | 0.036344 |
| PIGF       | 0.036313 |

|            |          |
|------------|----------|
| PITPNM3    | 0.036289 |
| ESS2       | 0.036249 |
| RPS27P21   | 0.036244 |
| URB2       | 0.036195 |
| ZBTB22     | 0.036166 |
| MICA       | 0.036147 |
| RPL23A     | 0.036131 |
| C1orf52    | 0.036103 |
| STK24      | 0.036086 |
| PARL       | 0.03606  |
| PTPN9      | 0.036049 |
| VWA8       | 0.03604  |
| TMEM163    | 0.036031 |
| CRCP       | 0.036009 |
| UBLCP1     | 0.035996 |
| SLC12A4    | 0.035992 |
| CREB3      | 0.035967 |
| REEP1      | 0.035952 |
| UTP25      | 0.035908 |
| ACAA1      | 0.035901 |
| ERO1B      | 0.035894 |
| TEX264     | 0.035886 |
| CACNA2D2   | 0.035878 |
| WNT9A      | 0.035876 |
| PIGK       | 0.035871 |
| RABL6      | 0.035863 |
| RWDD4P2    | 0.035805 |
| CFAP20     | 0.035773 |
| TRMT61A    | 0.035772 |
| ARL8B      | 0.035763 |
| CSNK1D     | 0.035733 |
| JPH1       | 0.035676 |
| PDS5A      | 0.035647 |
| FKBP8      | 0.035646 |
| TIMP1      | 0.035625 |
| PRDX5      | 0.035611 |
| ELOVL5     | 0.035593 |
| MCTS2P     | 0.035507 |
| PGBD2      | 0.03547  |
| ABHD5      | 0.035459 |
| IL20RA     | 0.035437 |
| DDB1       | 0.035432 |
| NSMCE1     | 0.035432 |
| ZSCAN25    | 0.035424 |
| SIKE1      | 0.035379 |
| FGF2       | 0.035365 |
| NFRKB      | 0.035361 |
| AC087269.1 | 0.035326 |
| ACADVL     | 0.035305 |

|            |          |
|------------|----------|
| SMARCC1    | 0.035301 |
| TAF1B      | 0.035296 |
| ASCC2      | 0.035286 |
| MTA1       | 0.035232 |
| CSNK2A2    | 0.035186 |
| COX7A2L    | 0.035157 |
| CCPG1      | 0.035143 |
| HSD17B8    | 0.035132 |
| NUDT5      | 0.035129 |
| CAT        | 0.035084 |
| GGT1       | 0.035068 |
| GLOD4      | 0.035049 |
| ALG12      | 0.035    |
| ATF6B      | 0.034956 |
| MREG       | 0.03494  |
| CDC34      | 0.034884 |
| DCAF12     | 0.034842 |
| NAB1       | 0.034825 |
| AHCY       | 0.034793 |
| ARIH1      | 0.034774 |
| LINC00511  | 0.034759 |
| SDHC       | 0.034732 |
| DOCK5      | 0.034708 |
| NIPBL      | 0.034686 |
| UBE2M      | 0.034678 |
| RPS11P5    | 0.034671 |
| AMMECR1L   | 0.03467  |
| SH3BGRL2   | 0.034656 |
| GXYLT1     | 0.034648 |
| ZDHHC9     | 0.034647 |
| RUVBL2     | 0.034588 |
| ACP1       | 0.034576 |
| SSR2       | 0.034531 |
| ZNF146     | 0.034531 |
| CDS1       | 0.034521 |
| AC131206.1 | 0.034483 |
| ZNF629     | 0.034441 |
| SAP30BP    | 0.034375 |
| STARD3NL   | 0.034368 |
| KRT8P33    | 0.034361 |
| BRD2       | 0.034344 |
| RIOK2      | 0.034324 |
| PPT2       | 0.034265 |
| OSM        | 0.034261 |
| RPF2       | 0.034206 |
| AC004943.2 | 0.034177 |
| SSRP1      | 0.034173 |
| HMCES      | 0.034134 |
| C5orf24    | 0.034115 |

|            |          |
|------------|----------|
| BCL7C      | 0.034055 |
| CENPN      | 0.034018 |
| HADHA      | 0.033948 |
| MRPS7      | 0.033943 |
| XPOT       | 0.033921 |
| CASTOR2    | 0.033904 |
| ALG8       | 0.033903 |
| AP3M1      | 0.033889 |
| SLC30A5    | 0.033861 |
| CHERP      | 0.033852 |
| MRPL40     | 0.03383  |
| CCZ1B      | 0.033783 |
| NCL        | 0.033735 |
| RPL19      | 0.033715 |
| MTX2       | 0.033714 |
| TIMMDC1    | 0.033708 |
| THAP10     | 0.033696 |
| PTPN11     | 0.033651 |
| AMPD2      | 0.033651 |
| MAPK12     | 0.033626 |
| AC233723.1 | 0.033618 |
| NT5DC3     | 0.033609 |
| MTX1       | 0.033598 |
| CHCHD5     | 0.033561 |
| RASSF6     | 0.03356  |
| RPS10      | 0.033535 |
| UTP14A     | 0.033516 |
| VAPA       | 0.033502 |
| FTSJ1      | 0.033497 |
| PNRC2P1    | 0.033482 |
| ZNF542P    | 0.03347  |
| BCKDHB     | 0.033466 |
| CDH24      | 0.033449 |
| DPY30      | 0.03342  |
| ERAL1      | 0.033406 |
| ATP5F1D    | 0.033391 |
| RAB18      | 0.033333 |
| PSPH       | 0.033305 |
| PRMT6      | 0.033263 |
| TTLL4      | 0.03325  |
| ITPR3      | 0.033225 |
| HTR7P1     | 0.033185 |
| RBBP8      | 0.033161 |
| AL133355.1 | 0.033144 |
| CAPRIN1    | 0.033129 |
| CTDSPL2    | 0.03308  |
| EIF3M      | 0.03308  |
| SH3BP4     | 0.033076 |
| WSB2       | 0.033036 |

|            |          |
|------------|----------|
| CALHM5     | 0.033017 |
| KHDC4      | 0.033016 |
| CTNNB1     | 0.033014 |
| FRAS1      | 0.033014 |
| RBM28      | 0.032988 |
| WDR53      | 0.032957 |
| SNRNP27    | 0.032939 |
| SLC6A6     | 0.032929 |
| CDC37      | 0.032914 |
| AL132712.1 | 0.032913 |
| MEGF9      | 0.032902 |
| RPS15      | 0.032873 |
| MAGOH      | 0.032872 |
| HOXC4      | 0.032858 |
| MYL12B     | 0.032813 |
| AC080112.1 | 0.032766 |
| ADAMTS10   | 0.032747 |
| PMS2P5     | 0.032721 |
| MSC        | 0.032631 |
| IRF2BP2    | 0.032626 |
| GTF2I      | 0.032624 |
| SURF2      | 0.032592 |
| UBA1       | 0.032587 |
| LMBRD2     | 0.032584 |
| HIRA       | 0.032556 |
| MYL12A     | 0.032541 |
| GULP1      | 0.032485 |
| ADHFE1     | 0.032464 |
| RAVER1     | 0.032429 |
| NDUFAF3    | 0.032367 |
| FGD4       | 0.032355 |
| TMEM248    | 0.032344 |
| WASH6P     | 0.032331 |
| SPG21      | 0.032327 |
| NR3C2      | 0.032309 |
| ARHGAP29   | 0.032282 |
| WDR13      | 0.032265 |
| POLR2E     | 0.032201 |
| AP000936.3 | 0.032173 |
| APMAP      | 0.032116 |
| RPLP1P6    | 0.032078 |
| TBX6       | 0.032069 |
| LMO7-AS1   | 0.032059 |
| MINDY2     | 0.032059 |
| TIGD5      | 0.032045 |
| HSBP1L1    | 0.032044 |
| TGFBR2     | 0.031975 |
| GNPNAT1    | 0.031939 |
| MFN2       | 0.031929 |

|            |          |
|------------|----------|
| EIF2D      | 0.031928 |
| HCCS       | 0.03191  |
| KRCC1      | 0.031909 |
| SMARCAL1   | 0.031873 |
| AKAP1      | 0.031844 |
| GCNA       | 0.03184  |
| KMT5A      | 0.031826 |
| POLR1H     | 0.031812 |
| BX537318.1 | 0.031805 |
| ZHX1       | 0.031795 |
| RDH13      | 0.031793 |
| ESF1       | 0.03178  |
| ZNF502     | 0.031737 |
| FBXO46     | 0.031685 |
| OSBPL5     | 0.031677 |
| HUWE1      | 0.031673 |
| STX6       | 0.031669 |
| PIGQ       | 0.031655 |
| SMIM10L1   | 0.031645 |
| TRIO       | 0.031635 |
| SLC35A4    | 0.031618 |
| EHD4       | 0.031605 |
| LSM5       | 0.031577 |
| FOXK1      | 0.031536 |
| SOCS6      | 0.031505 |
| TIMM17A    | 0.031481 |
| YY1        | 0.031451 |
| VDAC3      | 0.031442 |
| AC087741.2 | 0.031411 |
| RHOBTB1    | 0.031333 |
| ITPK1      | 0.031315 |
| CHAMP1     | 0.031314 |
| TARS1      | 0.031304 |
| TOB2       | 0.031299 |
| TLCD5      | 0.03129  |
| OAZ3       | 0.031271 |
| HYLS1      | 0.031212 |
| IPO13      | 0.031211 |
| HDAC5      | 0.031209 |
| CHCHD10    | 0.031202 |
| SMNDC1     | 0.031144 |
| AAAS       | 0.031096 |
| INTS11     | 0.031091 |
| IDH3A      | 0.031068 |
| NASP       | 0.03106  |
| TSEN34     | 0.031026 |
| MCCC2      | 0.031016 |
| RPL32      | 0.031007 |
| PRPF6      | 0.030971 |

|              |          |
|--------------|----------|
| CLTCL1       | 0.030961 |
| AC023157.2   | 0.030941 |
| RHPN1-AS1    | 0.03091  |
| LGALS3       | 0.03088  |
| SUMO2P1      | 0.030858 |
| SNIP1        | 0.030805 |
| RPE          | 0.030802 |
| MPV17L       | 0.030801 |
| BNC2         | 0.030799 |
| PMPCA        | 0.03077  |
| RPL7A        | 0.030746 |
| PRKAG2       | 0.030687 |
| RSPRY1       | 0.030684 |
| NKIRAS2      | 0.030673 |
| MTSS2        | 0.030642 |
| NIF3L1       | 0.030608 |
| ZCCHC9       | 0.030602 |
| SHANK2       | 0.030585 |
| RFXANK       | 0.030523 |
| LRWD1        | 0.030521 |
| ZNF639       | 0.030515 |
| POLQ         | 0.030508 |
| DHCR24       | 0.030507 |
| GTPBP6       | 0.030472 |
| SYDE2        | 0.030464 |
| FBRSL1       | 0.030409 |
| DPF2         | 0.030371 |
| ABT1         | 0.030317 |
| CIDEC1       | 0.030306 |
| BOLA2-SMG1P6 | 0.030271 |
| RAB27A       | 0.03027  |
| ITPA         | 0.030267 |
| EPRS1        | 0.030257 |
| ESD          | 0.030226 |
| AOPEP        | 0.030208 |
| VSTM2L       | 0.030133 |
| YARS1        | 0.030081 |
| CRAMP1       | 0.030079 |
| ARPC5L       | 0.030038 |
| DUSP11       | 0.030026 |
| MCM5         | 0.030007 |
| TBC1D14      | 0.029974 |
| ANTKMT       | 0.029966 |
| HNRNPU       | 0.029924 |
| SPOUT1       | 0.029923 |
| CELSR1       | 0.029917 |
| GMCL1        | 0.029911 |
| FUT10        | 0.029855 |
| JTB          | 0.029852 |

|            |          |
|------------|----------|
| ELP4       | 0.029846 |
| ZBED4      | 0.029802 |
| ATG16L1    | 0.029771 |
| C17orf58   | 0.029764 |
| SSR1       | 0.029762 |
| RBM42      | 0.029748 |
| KLHL7      | 0.029724 |
| AGAP3      | 0.029697 |
| VTA1       | 0.029694 |
| RRP7A      | 0.029688 |
| ABHD14B    | 0.029626 |
| TNS1       | 0.029606 |
| ARHGAP32   | 0.02957  |
| NAALADL2   | 0.029555 |
| LARGE2     | 0.029526 |
| RPL5       | 0.029426 |
| SPATA2L    | 0.029415 |
| AC133919.2 | 0.029409 |
| RFC2       | 0.029405 |
| RPS4XP16   | 0.029365 |
| IFITM2     | 0.029352 |
| AP002800.1 | 0.029349 |
| ENOX1      | 0.029344 |
| EMG1       | 0.02932  |
| TP53BP1    | 0.029309 |
| TMEM237    | 0.02929  |
| NOTCH2     | 0.029287 |
| CRNDE      | 0.029269 |
| GLB1       | 0.029253 |
| AKT1       | 0.029236 |
| WWC1       | 0.029234 |
| ATP6V1H    | 0.029217 |
| RMND5A     | 0.029199 |
| DCLK2      | 0.029196 |
| PAK2       | 0.029187 |
| SH3PXD2A   | 0.029156 |
| CHMP6      | 0.02915  |
| BBS4       | 0.029142 |
| ZNF518B    | 0.029134 |
| SMIM12     | 0.029127 |
| ARID3A     | 0.029112 |
| FERMT2     | 0.029101 |
| OST4       | 0.029099 |
| DHX34      | 0.029081 |
| PREP       | 0.029028 |
| USP8       | 0.029015 |
| CA5BP1     | 0.028935 |
| MARCHF5    | 0.028884 |
| CHID1      | 0.028879 |



|            |          |
|------------|----------|
| ELOVL6     | 0.028878 |
| NDUFS1     | 0.028856 |
| SNHG3      | 0.028854 |
| SERINC3    | 0.028803 |
| HYAL2      | 0.028777 |
| AL118511.1 | 0.028721 |
| LHPP       | 0.028661 |
| PIGW       | 0.028652 |
| MIR200A    | 0.028633 |
| PTS        | 0.028599 |
| ACSF2      | 0.02859  |
| HIGD1A     | 0.02857  |
| TMSB10     | 0.028537 |
| CYB561     | 0.028535 |
| PPM1H      | 0.028432 |
| MLLT3      | 0.028423 |
| DRG1       | 0.028409 |
| HEATR1     | 0.0284   |
| MARVELD2   | 0.028355 |
| AC107068.1 | 0.028327 |
| EIF4A2     | 0.028323 |
| RPL8       | 0.028286 |
| MAP1S      | 0.0282   |
| IGFALS     | 0.0282   |
| CENPL      | 0.028176 |
| RSPH3      | 0.028158 |
| GPSM2      | 0.028149 |
| UGP2       | 0.028142 |
| SLC25A39   | 0.028123 |
| ZER1       | 0.028105 |
| SMG6       | 0.028092 |
| HRAS       | 0.028073 |
| ADD1       | 0.02807  |
| HYI        | 0.02803  |
| ZSWIM1     | 0.02788  |
| PITRM1     | 0.027867 |
| CTDSP2     | 0.027823 |
| ARVCF      | 0.027821 |
| MIR22HG    | 0.027807 |
| CEP76      | 0.027807 |
| CCDC124    | 0.027774 |
| ARL3       | 0.027766 |
| MIR103A2   | 0.027719 |
| G6PC3      | 0.027674 |
| NAT10      | 0.02767  |
| SLC66A1    | 0.027623 |
| PARD6G     | 0.027612 |
| ALG1L6P    | 0.027569 |
| CUL4B      | 0.027562 |

|           |          |
|-----------|----------|
| PAF1      | 0.027508 |
| TBK1      | 0.027485 |
| DNPH1     | 0.027445 |
| MRPS16    | 0.027404 |
| CDAN1     | 0.02739  |
| FAM172BP  | 0.027385 |
| NOL6      | 0.027377 |
| BET1      | 0.027358 |
| PEX7      | 0.027349 |
| UCHL5     | 0.027335 |
| AIMP2     | 0.02733  |
| ATMIN     | 0.027303 |
| IFRD1     | 0.027279 |
| SNRPN     | 0.027272 |
| GPRC5B    | 0.02724  |
| CALM3     | 0.027236 |
| CMPK1     | 0.027223 |
| ESRP2     | 0.027221 |
| RPL21P119 | 0.027217 |
| HDDC3     | 0.027205 |
| STOML2    | 0.027183 |
| NBPF2P    | 0.027177 |
| BRME1     | 0.027162 |
| BROX      | 0.027141 |
| VKORC1L1  | 0.027137 |
| KARS1     | 0.027132 |
| ERI1      | 0.027131 |
| ATXN7L3   | 0.027127 |
| CDC23     | 0.027041 |
| DLK1      | 0.027036 |
| LTA4H     | 0.027033 |
| CD63      | 0.027028 |
| UTP6      | 0.027023 |
| SERP2     | 0.026975 |
| FASTK     | 0.026956 |
| MIOX      | 0.026952 |
| WDR75     | 0.026936 |
| OSR1      | 0.026934 |
| PTBP3     | 0.026905 |
| FANCC     | 0.026904 |
| INCENP    | 0.026888 |
| LSM3      | 0.026877 |
| SLC43A2   | 0.026873 |
| PATZ1     | 0.026872 |
| SEMA4F    | 0.026862 |
| ZMYND8    | 0.026837 |
| SAE1      | 0.02681  |
| THRAP3    | 0.026767 |
| FUBP3     | 0.026751 |

|            |          |
|------------|----------|
| PPIE       | 0.026713 |
| ENPEP      | 0.026703 |
| EXOC7      | 0.026661 |
| GDPGP1     | 0.026656 |
| ATXN2      | 0.026631 |
| USP42      | 0.026625 |
| AC073073.2 | 0.026616 |
| PTRH2      | 0.026608 |
| YDJC       | 0.026605 |
| ZNF610     | 0.026547 |
| HTT        | 0.026516 |
| AC099518.6 | 0.026476 |
| THSD7A     | 0.026447 |
| HMGA1P5    | 0.026442 |
| PUDP       | 0.02644  |
| AC092718.3 | 0.026425 |
| SRP14-AS1  | 0.026397 |
| PML        | 0.026391 |
| OVOL2      | 0.026389 |
| CALML4     | 0.026385 |
| CIC        | 0.026384 |
| ZSCAN16    | 0.026338 |
| TIRAP      | 0.026318 |
| EDA2R      | 0.026283 |
| NUTM2A-AS1 | 0.026276 |
| ACADM      | 0.026273 |
| MAN2A2     | 0.026264 |
| TMEM127    | 0.026256 |
| RTL8C      | 0.026208 |
| AC007773.1 | 0.0262   |
| PSPN       | 0.026197 |
| PUS1       | 0.026191 |
| AL590560.3 | 0.026171 |
| NT5C2      | 0.02616  |
| SP2-AS1    | 0.026138 |
| MELK       | 0.026137 |
| NDUFC1     | 0.026116 |
| ATP6V1E2   | 0.026054 |
| MRPL49     | 0.026054 |
| ZFP69B     | 0.026051 |
| DNAJB1     | 0.026043 |
| OPLAH      | 0.025974 |
| GTPBP10    | 0.025946 |
| HRH2       | 0.02586  |
| CHTOP      | 0.02583  |
| RAB27B     | 0.025803 |
| RTN3       | 0.025802 |
| AC005034.5 | 0.025763 |
| KIF15      | 0.025721 |

|            |          |
|------------|----------|
| EEFSEC     | 0.025709 |
| ABHD3      | 0.025707 |
| ANKRD40    | 0.025687 |
| PHF5A      | 0.025668 |
| ASMTL      | 0.025647 |
| TXLNA      | 0.025636 |
| NUDT12     | 0.02563  |
| BPNT1      | 0.025625 |
| ADNP       | 0.025594 |
| CORO1B     | 0.025517 |
| MAP11      | 0.025472 |
| PRKRIP1    | 0.025403 |
| NUMA1      | 0.025391 |
| PIP4K2B    | 0.02538  |
| ELAVL1     | 0.025367 |
| CYTH2      | 0.025351 |
| RNF135     | 0.025344 |
| DDX59      | 0.025309 |
| RPL6       | 0.02529  |
| AL139289.1 | 0.025289 |
| CITED2     | 0.025233 |
| TROAP      | 0.025225 |
| WNT3       | 0.025195 |
| Z84485.1   | 0.025183 |
| CLYBL      | 0.02518  |
| SNRNP200   | 0.025164 |
| HAGHL      | 0.025163 |
| MAPKAP1    | 0.025131 |
| FEZ2       | 0.025127 |
| ZNF532     | 0.025108 |
| RAB34      | 0.025075 |
| PEX14      | 0.025033 |
| KRTAP5-AS1 | 0.025033 |
| DPH6       | 0.025017 |
| NUP54      | 0.024977 |
| ZNF778     | 0.024976 |
| NRBF2      | 0.024974 |
| BRD1       | 0.024958 |
| SYF2       | 0.024957 |
| LMLN       | 0.024933 |
| ASAP1      | 0.024891 |
| NKAPD1     | 0.024876 |
| UGGT1      | 0.024867 |
| AQP3       | 0.024865 |
| CNP        | 0.024859 |
| PIP5K1C    | 0.024843 |
| TOP2A      | 0.024839 |
| INTS14     | 0.024796 |
| RCC2       | 0.024761 |

|            |          |
|------------|----------|
| NOM1       | 0.024705 |
| GOLIM4     | 0.024701 |
| BET1L      | 0.024681 |
| TIMM17B    | 0.024654 |
| SEPTIN7    | 0.024643 |
| MRPL1      | 0.024597 |
| SVIL-AS1   | 0.024517 |
| AC011979.1 | 0.0245   |
| TRIM65     | 0.024463 |
| SRFBP1     | 0.024452 |
| FRK        | 0.024446 |
| PEX26      | 0.024422 |
| ZNF71      | 0.024391 |
| CYB561D2   | 0.024385 |
| TLE1P1     | 0.024384 |
| HSPA5      | 0.02436  |
| CEP20      | 0.024332 |
| UBL7       | 0.02433  |
| STAT6      | 0.024329 |
| FTLP2      | 0.024323 |
| LONP1      | 0.024278 |
| MVB12A     | 0.024277 |
| A4GALT     | 0.024274 |
| C11orf54   | 0.024205 |
| LINC01270  | 0.024186 |
| ODR4       | 0.024167 |
| ST6GALNAC2 | 0.024146 |
| ARRDC4     | 0.024139 |
| ALOX12P2   | 0.024104 |
| CNFN       | 0.024102 |
| PPP2R1B    | 0.024092 |
| RNF187     | 0.024037 |
| PPCS       | 0.024007 |
| ZNF664     | 0.023972 |
| RMI2       | 0.023965 |
| MAP3K6     | 0.023959 |
| TACO1      | 0.023952 |
| DNAJB5     | 0.023905 |
| MOB4       | 0.023877 |
| HNRNPUL1   | 0.023851 |
| MDC1       | 0.023848 |
| DHRS13     | 0.023793 |
| TMEM167B   | 0.023788 |
| UBE2D1     | 0.023787 |
| AC026740.1 | 0.023782 |
| U52111.1   | 0.02376  |
| GIGYF1     | 0.023715 |
| LRP5       | 0.023641 |
| MNX1-AS2   | 0.023636 |

|            |          |
|------------|----------|
| CAPNS1     | 0.023614 |
| EIF2S2     | 0.023581 |
| CCNI2      | 0.023543 |
| RPS10P7    | 0.023538 |
| HMGN3-AS1  | 0.023507 |
| YWHAB      | 0.023479 |
| LMAN2      | 0.023477 |
| TADA3      | 0.023474 |
| MRPS12     | 0.023407 |
| CEMIP2     | 0.023379 |
| SMIM30     | 0.023368 |
| TTF1       | 0.023351 |
| MIGA1      | 0.023344 |
| PHKB       | 0.023343 |
| CUL3       | 0.023336 |
| CCNB2      | 0.023333 |
| CDC123     | 0.023316 |
| USP13      | 0.023307 |
| ERGIC3     | 0.023291 |
| ZNF513     | 0.023266 |
| NOP58      | 0.023257 |
| WDR45B     | 0.023221 |
| SCRN3      | 0.023221 |
| NUTF2      | 0.023218 |
| IREB2      | 0.02321  |
| COPS9      | 0.023206 |
| SKA1       | 0.02319  |
| AP001318.2 | 0.023169 |
| SLC38A7    | 0.023159 |
| ILRUN-AS1  | 0.023139 |
| MED17      | 0.023131 |
| RHNO1      | 0.023127 |
| MTIF2      | 0.023104 |
| AP3B1      | 0.023103 |
| DDRGK1     | 0.023059 |
| CLIP4      | 0.023007 |
| LRRC45     | 0.023004 |
| PAFAH2     | 0.022998 |
| RPN2       | 0.022985 |
| PARP16     | 0.022979 |
| LINC02004  | 0.022927 |
| PLCXD1     | 0.022916 |
| RPS6KB1    | 0.022909 |
| RBM48      | 0.022891 |
| METTL7B    | 0.022876 |
| NRSN2      | 0.022771 |
| WIF1       | 0.022745 |
| BCAP31     | 0.022685 |
| TAF7       | 0.022684 |

|            |          |
|------------|----------|
| POLDIP3    | 0.022672 |
| HSP90AA1   | 0.022657 |
| BSPRY      | 0.022648 |
| RAP1B      | 0.022621 |
| GOPC       | 0.022614 |
| ZNF618     | 0.022576 |
| DDX52      | 0.022563 |
| ARHGEF11   | 0.022549 |
| DISP1      | 0.022538 |
| PURB       | 0.022493 |
| PABPC1     | 0.022486 |
| ELOA       | 0.022454 |
| RBM14      | 0.022444 |
| CTNS       | 0.022434 |
| PABPC4     | 0.022415 |
| NUP50      | 0.022397 |
| AC124283.2 | 0.022392 |
| LBX2       | 0.022373 |
| MRPL20-AS1 | 0.022368 |
| VPS39      | 0.022366 |
| ZNF865     | 0.022364 |
| TRMT6      | 0.022331 |
| HLA3       | 0.022304 |
| FAM171B    | 0.022283 |
| SPDEF      | 0.022279 |
| IFITM3P2   | 0.022247 |
| PPP1CB     | 0.022222 |
| MRPL17     | 0.02222  |
| FNTA       | 0.022213 |
| PSMF1      | 0.022212 |
| PSMC1P1    | 0.02217  |
| KCTD1      | 0.022148 |
| LINC01123  | 0.022109 |
| SPATA2     | 0.022108 |
| ARL2BP     | 0.022108 |
| RNF216P1   | 0.022036 |
| MRPS26     | 0.022003 |
| PIM1       | 0.022003 |
| SMARCD1    | 0.021963 |
| WDR18      | 0.02196  |
| HLTF       | 0.02193  |
| SQSTM1     | 0.021921 |
| PTEN       | 0.021912 |
| SNRPA1     | 0.021891 |
| DYNC2I1    | 0.021884 |
| MRPL58     | 0.021868 |
| BACE1      | 0.02185  |
| CS         | 0.02181  |
| RGMB       | 0.021795 |

|              |          |
|--------------|----------|
| SLC35B3      | 0.021678 |
| TMEM186      | 0.021661 |
| AC026412.1   | 0.02165  |
| ADAR         | 0.021637 |
| NSUN4        | 0.021618 |
| RPL27        | 0.021609 |
| LSM14B       | 0.021604 |
| RPL22        | 0.021556 |
| SCT          | 0.021541 |
| ZDHHC3       | 0.021534 |
| PSMD8        | 0.021532 |
| ZSWIM7       | 0.021525 |
| HS2ST1       | 0.021524 |
| MCRS1        | 0.021491 |
| SLC35C2      | 0.021474 |
| NCOR1        | 0.021454 |
| GTF3C5       | 0.021408 |
| NUDT21       | 0.021392 |
| BOLA1        | 0.02139  |
| RPS14        | 0.021384 |
| AC016727.1   | 0.021384 |
| STARD10      | 0.021374 |
| EPB41L4A-AS1 | 0.021366 |
| OXCT1        | 0.021362 |
| AC106738.1   | 0.021305 |
| FAM136A      | 0.0213   |
| AHCTF1       | 0.021271 |
| HDAC6        | 0.021264 |
| TMEM123      | 0.021237 |
| NDN          | 0.021201 |
| NDUFS8       | 0.02118  |
| RPS4XP22     | 0.021102 |
| LINC02777    | 0.021084 |
| KCP          | 0.021083 |
| YIPF6        | 0.021074 |
| NDUFA5       | 0.021049 |
| METTL27      | 0.021034 |
| AIG1         | 0.021025 |
| CNNM3        | 0.021005 |
| IRX6         | 0.021    |
| TRPC4AP      | 0.020997 |
| AP003119.2   | 0.020958 |
| EIF3E        | 0.020953 |
| AL162258.2   | 0.020952 |
| RPP30        | 0.020944 |
| SOD1         | 0.020941 |
| MPV17        | 0.020933 |
| UBC          | 0.020905 |
| LEMD2        | 0.020888 |



|            |          |
|------------|----------|
| LINC00339  | 0.020853 |
| POLR2M     | 0.020833 |
| SLC25A43   | 0.020828 |
| TMA16      | 0.020821 |
| SMARCD3    | 0.020816 |
| BRCA1      | 0.020805 |
| COPS3      | 0.020754 |
| RPS12      | 0.020751 |
| UNC13D     | 0.020737 |
| SPCS2P4    | 0.020724 |
| ASAP3      | 0.020625 |
| DNAJC11    | 0.020622 |
| AAR2       | 0.020617 |
| EEF1A1P19  | 0.020559 |
| CDPF1      | 0.020557 |
| RBM7       | 0.020545 |
| TM2D3      | 0.020497 |
| CTBP1-DT   | 0.020497 |
| USP36      | 0.020477 |
| GLRX5      | 0.020444 |
| ATXN7L3B   | 0.020435 |
| SEC24B     | 0.020434 |
| OIP5-AS1   | 0.020389 |
| GSTCD      | 0.020377 |
| DMRTA2     | 0.020373 |
| PKD2       | 0.020367 |
| GALNT7     | 0.020357 |
| HMGB1P6    | 0.020342 |
| FNTB       | 0.020336 |
| TRAM2      | 0.020283 |
| SLC25A15   | 0.02024  |
| ZNF468     | 0.020222 |
| ZNF561-AS1 | 0.020218 |
| SREBF1     | 0.020217 |
| CXorf56    | 0.020216 |
| TMEM45B    | 0.020211 |
| LRRC40     | 0.020167 |
| PRR5       | 0.020164 |
| CHCHD4     | 0.02015  |
| SH3KBP1    | 0.020122 |
| ABRAXAS2   | 0.020082 |
| CDKN2AIP   | 0.020037 |
| THRA       | 0.020028 |
| FGD5-AS1   | 0.020016 |
| TRIM37     | 0.019917 |
| AMFR       | 0.019901 |
| KAT5       | 0.019843 |
| TRIM39     | 0.019774 |
| TSPAN6     | 0.019761 |

|            |          |
|------------|----------|
| SRRD       | 0.019744 |
| SELENON    | 0.019735 |
| CCDC91     | 0.019725 |
| PPP1R15B   | 0.01969  |
| HNRNPR     | 0.019682 |
| HSPB2      | 0.019675 |
| ERCC3      | 0.019673 |
| PAPSS1     | 0.019647 |
| BCCIP      | 0.019638 |
| CAPZA1     | 0.019636 |
| TPRKB      | 0.019617 |
| AC141586.1 | 0.019604 |
| PJA2       | 0.019588 |
| FBXO36     | 0.019581 |
| IL27RA     | 0.019577 |
| TOPBP1     | 0.01957  |
| PEMT       | 0.019556 |
| TGS1       | 0.019503 |
| VEZF1      | 0.019454 |
| DHTKD1     | 0.019428 |
| ZNF784     | 0.019417 |
| AP000704.1 | 0.019366 |
| LSM11      | 0.019358 |
| RTF2       | 0.019357 |
| AKR7L      | 0.019315 |
| ISOC1      | 0.019301 |
| ZZZ3       | 0.019279 |
| TP53TG1    | 0.019238 |
| LSM2       | 0.019227 |
| KLHDC8A    | 0.01921  |
| ANKRD11    | 0.019184 |
| YY1AP1     | 0.019177 |
| MRPL19     | 0.019163 |
| XPO1       | 0.019097 |
| TEX261     | 0.019089 |
| SPTY2D1    | 0.019084 |
| AMY2B      | 0.019065 |
| RARS2      | 0.019043 |
| PACSIN1    | 0.019035 |
| ZNRF1      | 0.018992 |
| TMEM185B   | 0.018984 |
| MMP7       | 0.018976 |
| AC026356.1 | 0.01897  |
| ZNF787     | 0.018953 |
| HERC4      | 0.018936 |
| MGRN1      | 0.018891 |
| RPL13      | 0.018886 |
| C2orf76    | 0.018874 |
| TMEM177    | 0.018846 |

|                |          |
|----------------|----------|
| HMGB1P5        | 0.018832 |
| MFSD3          | 0.018827 |
| BAG5           | 0.018774 |
| PTOV1          | 0.018771 |
| PTH1R          | 0.018759 |
| MYO1D          | 0.018758 |
| HPS3           | 0.018742 |
| TMEM128        | 0.018721 |
| DGKD           | 0.0187   |
| EP300          | 0.018691 |
| FST            | 0.018658 |
| ATP23          | 0.01864  |
| C4orf36        | 0.018623 |
| METTL23        | 0.018614 |
| WDR55          | 0.01861  |
| AC007382.1     | 0.0186   |
| ARMCX5-GPRASP2 | 0.018584 |
| LMO4           | 0.018574 |
| ATPAF2         | 0.018567 |
| DCAF6          | 0.018564 |
| ATAD1          | 0.018558 |
| PPARA          | 0.01853  |
| ABHD14A        | 0.018485 |
| CCL13          | 0.01844  |
| SLC49A3        | 0.018405 |
| AL391903.1     | 0.018383 |
| GOSR1          | 0.018365 |
| EXOC2          | 0.018356 |
| RPL36          | 0.018354 |
| G3BP1          | 0.018336 |
| ZFY            | 0.018288 |
| ENTPD3-AS1     | 0.018269 |
| RPL17P36       | 0.018236 |
| BUB3           | 0.018204 |
| WDR74          | 0.018192 |
| KIF5B          | 0.018187 |
| NTN1           | 0.018183 |
| CARMIL1        | 0.01817  |
| PYROXD2        | 0.018157 |
| NSDHL          | 0.018087 |
| AC006511.3     | 0.018061 |
| TM9SF2         | 0.018033 |
| PACS1          | 0.018027 |
| MAP2K7         | 0.018016 |
| CCDC6          | 0.017983 |
| EXO5           | 0.017968 |
| COX5BP6        | 0.017917 |
| OR7E38P        | 0.017894 |
| UBE2Q2         | 0.017884 |

|           |          |
|-----------|----------|
| PRPF3     | 0.017878 |
| DPH5      | 0.017877 |
| CLPTM1    | 0.017844 |
| MARVELD3  | 0.017837 |
| RNF41     | 0.017812 |
| ZNF746    | 0.01777  |
| DUSP4     | 0.017765 |
| ANAPC15   | 0.017727 |
| UFSP2     | 0.017721 |
| EGFLAM    | 0.017693 |
| RRM1      | 0.017659 |
| CDC7      | 0.017655 |
| ZNF581    | 0.017616 |
| SETMAR    | 0.017579 |
| MSMO1     | 0.017562 |
| GEMIN8P4  | 0.017562 |
| GPAA1     | 0.017536 |
| MRM1      | 0.017527 |
| EEPD1     | 0.017499 |
| TRIP12    | 0.01749  |
| CSRNP2    | 0.017485 |
| TMEM121   | 0.017482 |
| RAD21     | 0.017427 |
| FBXW4     | 0.01737  |
| LGSN      | 0.017366 |
| E2F4      | 0.017302 |
| PWP1      | 0.017301 |
| SYNGR2    | 0.017299 |
| CBX5      | 0.017297 |
| LMO7      | 0.017288 |
| PSMA5     | 0.01728  |
| HPF1      | 0.017253 |
| LYPD1     | 0.017237 |
| KLF15     | 0.017235 |
| MICU1     | 0.01722  |
| PSMG4     | 0.017207 |
| LPCAT3    | 0.017201 |
| NDUFV1    | 0.017184 |
| PRLR      | 0.017183 |
| EIF4G3    | 0.017177 |
| LINC00957 | 0.017107 |
| RAB22A    | 0.017099 |
| COPB1     | 0.017099 |
| EIF2S1    | 0.017098 |
| ZNF140    | 0.017089 |
| ZDHHHC5   | 0.017067 |
| RAD50     | 0.017049 |
| ZNF76     | 0.017036 |
| REST      | 0.016996 |

|            |          |
|------------|----------|
| POLR1D     | 0.016989 |
| YPEL1      | 0.016975 |
| NUDT14     | 0.016974 |
| NUP85      | 0.016957 |
| FBXO4      | 0.01695  |
| FAM185A    | 0.016879 |
| PCDHB9     | 0.01686  |
| DLGAP4     | 0.016842 |
| TEX10      | 0.016834 |
| DHX15      | 0.01683  |
| UFM1       | 0.016823 |
| RABIF      | 0.016814 |
| SUSD4      | 0.016704 |
| OSBP       | 0.016691 |
| IFFO2      | 0.016677 |
| PPP4C      | 0.016639 |
| DPH1       | 0.016636 |
| GUCD1      | 0.016625 |
| TIMM23     | 0.016623 |
| F2RL3      | 0.016606 |
| ACBD5      | 0.016595 |
| LINC00513  | 0.016546 |
| SNRPB      | 0.016518 |
| CLDN3      | 0.016503 |
| NABP2      | 0.016449 |
| ZBTB8A     | 0.016437 |
| DPYSL3     | 0.016411 |
| RAD51C     | 0.016375 |
| LRRC58     | 0.016367 |
| PITHD1     | 0.016343 |
| ECD        | 0.016321 |
| CCDC15     | 0.016312 |
| TUFM       | 0.016307 |
| SLC19A1    | 0.016289 |
| CHM        | 0.016275 |
| RHOA       | 0.016274 |
| GGPS1      | 0.016251 |
| HINFP      | 0.016241 |
| TESK1      | 0.01624  |
| SHLD2      | 0.01622  |
| MKRN1      | 0.016185 |
| SLC14A1    | 0.016178 |
| APOOL      | 0.016178 |
| AC005288.1 | 0.016173 |
| MAPK3      | 0.016162 |
| KYAT1      | 0.016147 |
| THUMPD2    | 0.016143 |
| PSRC1      | 0.016082 |
| FAM193A    | 0.016049 |

|             |          |
|-------------|----------|
| PPP1R26-AS1 | 0.015992 |
| KANSL2      | 0.015964 |
| RPL7        | 0.01595  |
| TUSC2       | 0.015943 |
| RFTN1       | 0.015936 |
| DENR        | 0.01591  |
| UBE2F       | 0.015899 |
| DOP1B       | 0.015876 |
| MFSD6L      | 0.015869 |
| ITGA9       | 0.015852 |
| CAPN5       | 0.015837 |
| PDRG1       | 0.015834 |
| VLDLR       | 0.015829 |
| UBE4A       | 0.015815 |
| SRGAP2C     | 0.015804 |
| DMAC2       | 0.015734 |
| MYL6        | 0.015731 |
| RAB32       | 0.015688 |
| CNOT6       | 0.015679 |
| FEM1B       | 0.015677 |
| C11orf45    | 0.015676 |
| MIR589      | 0.01567  |
| RBM22       | 0.015641 |
| PRPSAP1     | 0.015627 |
| EBF4        | 0.015592 |
| NUDCD2      | 0.015577 |
| AC099850.1  | 0.015576 |
| C15orf40    | 0.015575 |
| UPF1        | 0.015562 |
| ZNF691      | 0.015554 |
| MIER3       | 0.015554 |
| RWDD4       | 0.015543 |
| MGST2       | 0.015532 |
| COX7A1      | 0.015523 |
| NAT9        | 0.015494 |
| MICOS10P3   | 0.015492 |
| MRPL32      | 0.015489 |
| KXD1        | 0.015434 |
| PLXNB3      | 0.015378 |
| WRAP53      | 0.015325 |
| PCGF2       | 0.015269 |
| ZG16B       | 0.015262 |
| BLOC1S3     | 0.015241 |
| TCF3        | 0.015211 |
| CDK13       | 0.015187 |
| BAZ1B       | 0.015166 |
| HMG20A      | 0.015152 |
| RAB5C       | 0.015137 |
| B4GALT7     | 0.015113 |

|            |          |
|------------|----------|
| C1D        | 0.015111 |
| TMEM141    | 0.015105 |
| RAE1       | 0.015095 |
| MID1       | 0.015087 |
| CENPW      | 0.01508  |
| TMTC1      | 0.015076 |
| RAB3D      | 0.015031 |
| RRP15      | 0.015031 |
| STRN       | 0.015015 |
| RNMT       | 0.015014 |
| PDXDC1     | 0.014998 |
| PDCD2L     | 0.014991 |
| DDX49      | 0.014979 |
| SECTM1     | 0.014955 |
| TFPI2      | 0.014946 |
| VASH2      | 0.014897 |
| UBE2Z      | 0.014889 |
| AC004923.4 | 0.014878 |
| CENPB      | 0.014861 |
| SLC35D1    | 0.014773 |
| SORT1      | 0.014725 |
| RPN1       | 0.014677 |
| ZC4H2      | 0.014671 |
| TSPAN4     | 0.014621 |
| SLC29A2    | 0.014579 |
| KRBA1      | 0.014565 |
| MED14      | 0.014555 |
| CHTF18     | 0.014476 |
| SOCS5      | 0.014418 |
| POLE4      | 0.014412 |
| C6orf120   | 0.014406 |
| UBTF       | 0.014405 |
| TOR1B      | 0.014395 |
| RPS27      | 0.014393 |
| DPEP1      | 0.014361 |
| SHROOM3    | 0.01434  |
| CMTM1      | 0.01429  |
| QTRT2      | 0.014289 |
| STAG3L4    | 0.014239 |
| OXSM       | 0.01423  |
| TNKS2-AS1  | 0.014227 |
| CYB5A      | 0.014212 |
| MEAF6      | 0.014211 |
| PAAF1      | 0.014204 |
| TAF5L      | 0.014195 |
| KLC2       | 0.014173 |
| LARS1      | 0.01417  |
| PHACTR4    | 0.014139 |
| FUBP1      | 0.014134 |

|            |          |
|------------|----------|
| EIF4E2     | 0.014058 |
| ZC3H13     | 0.014053 |
| LARS2      | 0.014049 |
| ARMT1      | 0.014039 |
| POLL       | 0.01403  |
| CCDC71L    | 0.014003 |
| SYNCRIP    | 0.013994 |
| CPSF3      | 0.013982 |
| PFN1       | 0.013979 |
| FBXO5      | 0.013957 |
| HSPD1      | 0.013953 |
| NORAD      | 0.01391  |
| AEBP2      | 0.01386  |
| COG8       | 0.01386  |
| USP39      | 0.013851 |
| C6orf226   | 0.01385  |
| ZNF204P    | 0.013837 |
| AL031602.1 | 0.013795 |
| ZNF544     | 0.013794 |
| GTF2F1     | 0.013786 |
| GLRX       | 0.013783 |
| NUP37      | 0.013768 |
| BBOX1-AS1  | 0.013762 |
| SNPH       | 0.013758 |
| LINC01612  | 0.013757 |
| ABCB8      | 0.013749 |
| ELP6       | 0.013725 |
| FKBP2      | 0.013701 |
| USP21      | 0.013694 |
| MRPL20     | 0.013689 |
| SLC9A3-AS1 | 0.013683 |
| GSTZ1      | 0.013674 |
| CIAO3      | 0.01367  |
| KLHL42     | 0.013636 |
| RETREG3    | 0.013588 |
| IGFBP4     | 0.013587 |
| AGPAT2     | 0.013584 |
| TERF2      | 0.013556 |
| DNAJC19    | 0.013555 |
| PPP2CB     | 0.013548 |
| TONSL      | 0.013512 |
| ROCK2      | 0.013492 |
| AC067838.1 | 0.013462 |
| MTFMT      | 0.013446 |
| ZDHHC20    | 0.013421 |
| NEURL1B    | 0.013372 |
| RAB43      | 0.013334 |
| COX5A      | 0.013331 |
| RPL28      | 0.013276 |



|            |          |
|------------|----------|
| MYPOP      | 0.013274 |
| WDR4       | 0.013229 |
| TMEM88     | 0.01322  |
| AL035461.2 | 0.013201 |
| RNY3P8     | 0.013178 |
| TRPT1      | 0.01316  |
| CACYBP     | 0.013137 |
| CDK18      | 0.013111 |
| GPR161     | 0.013107 |
| AGFG2      | 0.013098 |
| LINC00261  | 0.013082 |
| MRPL22     | 0.013079 |
| DNMBP-AS1  | 0.013051 |
| ENG        | 0.013048 |
| LINC01128  | 0.013032 |
| ZSCAN29    | 0.013029 |
| GATAD1     | 0.012992 |
| SGTA       | 0.012947 |
| ECSIT      | 0.012946 |
| ACBD3      | 0.012934 |
| AC092071.1 | 0.012934 |
| KAT14      | 0.012916 |
| FOXP1      | 0.01291  |
| EEF1E1     | 0.01291  |
| MBTPS1     | 0.012881 |
| TMCC1      | 0.012864 |
| ERCC8      | 0.012846 |
| ANKRD17    | 0.012839 |
| FOXRED1    | 0.012838 |
| MAPRE1     | 0.012838 |
| NDUFA4     | 0.012832 |
| NCBP1      | 0.012794 |
| THUMPD3    | 0.012782 |
| ENAH       | 0.012702 |
| FAM149B1   | 0.012686 |
| POLR3A     | 0.012685 |
| H3P36      | 0.012682 |
| RPAP3      | 0.012672 |
| ANAPC16    | 0.012619 |
| TMEM263    | 0.012603 |
| GNAS       | 0.012583 |
| BORCS7     | 0.012562 |
| GNG10      | 0.012552 |
| ZNF256     | 0.012552 |
| AC009318.3 | 0.012502 |
| RPL29P11   | 0.012484 |
| LPP        | 0.012476 |
| FAM210B    | 0.012465 |
| NDUFAB1    | 0.01236  |

|            |          |
|------------|----------|
| SLC39A4    | 0.012349 |
| C10orf88B  | 0.012338 |
| DCAF1      | 0.012261 |
| RPL5P4     | 0.01223  |
| PLEKHA8    | 0.012201 |
| SRP19      | 0.012191 |
| AC007383.1 | 0.012184 |
| GNPAT      | 0.012179 |
| AP3D1      | 0.012162 |
| GSK3B      | 0.012159 |
| DYNLL1     | 0.012143 |
| FER        | 0.012142 |
| SHPK       | 0.012128 |
| WDHD1      | 0.012098 |
| THAP1      | 0.012036 |
| ZNF524     | 0.012027 |
| ADO        | 0.01202  |
| GPI        | 0.012004 |
| RIPK4      | 0.011976 |
| H2BC15     | 0.011961 |
| CYCSP34    | 0.01196  |
| CAST       | 0.011881 |
| CST5       | 0.011861 |
| KEAP1      | 0.011858 |
| OPA1       | 0.011839 |
| ZNF813     | 0.011809 |
| ZFAND5     | 0.011806 |
| ZSWIM9     | 0.011798 |
| DNAJC8     | 0.011798 |
| STXBP5     | 0.011793 |
| GMPPA      | 0.011779 |
| RBMS3-AS3  | 0.011759 |
| EIF3L      | 0.01175  |
| CFI        | 0.011719 |
| HTRA2      | 0.011669 |
| RAB21      | 0.011655 |
| ZC3H18     | 0.011648 |
| GTF3C1     | 0.011638 |
| AC093535.2 | 0.01162  |
| ZNF883     | 0.011587 |
| TMEM94     | 0.011567 |
| BECN1      | 0.011549 |
| TFCP2      | 0.011545 |
| STPG1      | 0.01154  |
| RMDN3      | 0.011527 |
| NAA60      | 0.011476 |
| CDYL2      | 0.011472 |
| LYVE1      | 0.01147  |
| IPMK       | 0.011445 |

|            |          |
|------------|----------|
| UMAD1      | 0.011439 |
| GEMIN6     | 0.011439 |
| AP5B1      | 0.011368 |
| SNRNP25    | 0.011347 |
| CDIPT      | 0.011338 |
| FIZ1       | 0.011331 |
| IPO11      | 0.011292 |
| ARHGEF12   | 0.011279 |
| BBS7       | 0.011268 |
| EBP        | 0.011265 |
| ZNF626     | 0.011256 |
| ZBTB10     | 0.01124  |
| EHD1       | 0.011203 |
| TMCO6      | 0.011163 |
| PPTC7      | 0.011042 |
| HSPBP1     | 0.011012 |
| MTG2       | 0.011004 |
| MRPL55     | 0.010964 |
| NDUFA2     | 0.010947 |
| COX7CP1    | 0.010898 |
| AC107027.3 | 0.010896 |
| PDE2A      | 0.010872 |
| FBXL13     | 0.010769 |
| PCDHB8     | 0.010731 |
| MCTP2      | 0.010713 |
| SNX19      | 0.010712 |
| SYNJ2      | 0.010695 |
| SRGAP2     | 0.010678 |
| AL513477.2 | 0.010673 |
| SLC7A10    | 0.010639 |
| MED19      | 0.010627 |
| NOXA1      | 0.010564 |
| LMNTD2     | 0.010551 |
| AC020915.2 | 0.010547 |
| HMGXB4     | 0.010541 |
| NXPH3      | 0.010541 |
| AC104447.1 | 0.010537 |
| CENPJ      | 0.010529 |
| ARID1A     | 0.010521 |
| MED1       | 0.010521 |
| DCLRE1B    | 0.010511 |
| BOLA3      | 0.010505 |
| ZSCAN22    | 0.010498 |
| ZNF670     | 0.010485 |
| WDCP       | 0.010478 |
| MYBL2      | 0.010454 |
| NXT2       | 0.010439 |
| NME6       | 0.010423 |
| FKBP1B     | 0.010422 |

|         |          |
|---------|----------|
| BPNT2   | 0.010415 |
| TMEM230 | 0.01039  |
| SLC66A3 | 0.010364 |
| RTCB    | 0.01035  |
| ACD     | 0.010349 |
| SCOC    | 0.010347 |
| BRAP    | 0.010337 |
| NSF     | 0.010337 |
| VAPB    | 0.010328 |
| CHST10  | 0.010325 |
| TBCA    | 0.010316 |
| DNA2    | 0.010303 |
| BBX     | 0.010262 |
| ZFAND2A | 0.010213 |
| LDHB    | 0.01021  |
| ATP5MD  | 0.010198 |
| C1orf50 | 0.010179 |
| ZBTB45  | 0.010154 |
| MACO1   | 0.010123 |
| ARMCX5  | 0.010112 |
| FZD4    | 0.010102 |
| POLD3   | 0.010064 |
| POLR2D  | 0.010052 |
| ZNF367  | 0.010043 |
| SKA2    | 0.010005 |
| NCK1    | 0.009998 |
| UBE2E2  | 0.009992 |
| SLF1    | 0.009965 |
| TYW3    | 0.009945 |
| SLC35F3 | 0.009844 |
| ILDR1   | 0.009835 |
| IL4R    | 0.009825 |
| MPG     | 0.009808 |
| EDF1    | 0.009777 |
| HBS1L   | 0.009757 |
| RHEB    | 0.009748 |
| CINP    | 0.009747 |
| UBALD1  | 0.009739 |
| PBK     | 0.009729 |
| OGDHL   | 0.009686 |
| TECR    | 0.009673 |
| DCTN4   | 0.009669 |
| TADA2B  | 0.00966  |
| DSTYK   | 0.009658 |
| SLC35A3 | 0.009651 |
| LARP4   | 0.009631 |
| C8orf58 | 0.00963  |
| LAS1L   | 0.009589 |
| ATAD2   | 0.009563 |

|            |          |
|------------|----------|
| SLC23A2    | 0.009546 |
| EVA1C      | 0.009537 |
| RPL18      | 0.009528 |
| COG3       | 0.009522 |
| SBNO1      | 0.009504 |
| MCMBP      | 0.009489 |
| SMARCD2    | 0.009472 |
| DBT        | 0.009471 |
| HCFC1      | 0.009466 |
| PSMD14     | 0.00945  |
| USP54      | 0.009445 |
| AC104794.3 | 0.00941  |
| MTCO1P12   | 0.009402 |
| POLD1      | 0.0094   |
| UBE2T      | 0.009398 |
| ALPK3      | 0.009362 |
| STX5       | 0.009357 |
| PIK3R4     | 0.009352 |
| ALKBH7     | 0.009303 |
| PPFIA3     | 0.009291 |
| AC009779.2 | 0.00926  |
| SNRPA      | 0.009188 |
| RNF123     | 0.009122 |
| CD47       | 0.009107 |
| PRRG4      | 0.009098 |
| UCN3       | 0.00909  |
| TRMT12     | 0.009066 |
| NUP214     | 0.009061 |
| FAM53C     | 0.009053 |
| TSC2       | 0.009044 |
| MOCS2      | 0.009042 |
| LSS        | 0.00902  |
| EPAS1      | 0.009    |
| ATP6V0B    | 0.008972 |
| AC020978.4 | 0.008939 |
| ZNF837     | 0.008928 |
| WBP4       | 0.008917 |
| DDX18      | 0.008887 |
| SKIL       | 0.008873 |
| SDHD       | 0.008855 |
| C9orf16    | 0.008749 |
| ROR2       | 0.008744 |
| SIK2       | 0.008743 |
| THAP9-AS1  | 0.00869  |
| NIT2       | 0.008643 |
| ISOC2      | 0.008622 |
| TMEM208    | 0.008621 |
| BRD9       | 0.008606 |
| FBXW11     | 0.008573 |

|            |          |
|------------|----------|
| C8orf82    | 0.008545 |
| GTF3C3     | 0.00854  |
| EIF2A      | 0.008513 |
| HCG18      | 0.008503 |
| UTP15      | 0.008437 |
| CAMSAP1    | 0.008428 |
| MAML2      | 0.008422 |
| XPNPEP1    | 0.008414 |
| PDCD10     | 0.008411 |
| RNFT2      | 0.008388 |
| CD44       | 0.00827  |
| ISCA1      | 0.00827  |
| TMED9      | 0.008262 |
| EMC10      | 0.008261 |
| AL160006.1 | 0.008252 |
| RAB4A      | 0.008243 |
| AC010615.2 | 0.008228 |
| C1QL2      | 0.008211 |
| ZNF395     | 0.008195 |
| HDHD5      | 0.008135 |
| RNU6-30P   | 0.008128 |
| ILRUN      | 0.008118 |
| AC010969.2 | 0.008086 |
| SREK1IP1   | 0.008078 |
| DHODH      | 0.008073 |
| CRPPA      | 0.008064 |
| PPP1R10    | 0.008041 |
| LRRC37A3   | 0.008038 |
| MCRIP1     | 0.008034 |
| ATP5MG     | 0.007994 |
| HMGXB3     | 0.007994 |
| HP         | 0.007983 |
| EID1       | 0.007969 |
| SNAPIN     | 0.007932 |
| ZNF398     | 0.007884 |
| SMC1A      | 0.007865 |
| TK2        | 0.007848 |
| CNPY4      | 0.007813 |
| DHX9       | 0.007794 |
| NVL        | 0.007779 |
| ATF6       | 0.007777 |
| ESYT1      | 0.007768 |
| ZC3H3      | 0.007754 |
| GTF2H5     | 0.007729 |
| ACOT8      | 0.007701 |
| RBBP4      | 0.007694 |
| GSPT1      | 0.007692 |
| CDCA2      | 0.00765  |
| ACOX3      | 0.007643 |

|            |          |
|------------|----------|
| NKD2       | 0.007576 |
| UPF3B      | 0.007518 |
| DAZAP2     | 0.007517 |
| TMEM219    | 0.007475 |
| ITGB1BP1   | 0.007466 |
| BRD3       | 0.007357 |
| CCNY       | 0.007311 |
| ZNF12      | 0.007302 |
| BTG3       | 0.007297 |
| PEX13      | 0.007277 |
| BEAN1      | 0.007271 |
| RRBP1      | 0.007265 |
| SHISA5     | 0.007261 |
| RBBP5      | 0.007252 |
| SCAT8      | 0.007238 |
| ABCB7      | 0.007233 |
| ZNF827     | 0.007226 |
| MTFP1      | 0.007221 |
| WFDC10B    | 0.007162 |
| PARK7      | 0.007157 |
| RPS6       | 0.007126 |
| TMEM97     | 0.007085 |
| AC018645.3 | 0.007039 |
| TBC1D9B    | 0.00703  |
| NUP62      | 0.007005 |
| CCL28      | 0.007004 |
| AGO1       | 0.00697  |
| BRCC3      | 0.00688  |
| POLR2C     | 0.006839 |
| DNAJC15    | 0.006805 |
| UBXN6      | 0.006798 |
| C15orf61   | 0.006785 |
| CSTF2T     | 0.006785 |
| SLC25A22   | 0.006766 |
| WAC-AS1    | 0.006728 |
| DDX31      | 0.006713 |
| PCDHB2     | 0.006711 |
| ERN2       | 0.006709 |
| GPATCH3    | 0.006588 |
| STXBP2     | 0.006555 |
| LINC01278  | 0.006522 |
| LTBP2      | 0.006493 |
| CDC42SE1   | 0.006475 |
| SLC41A2    | 0.006442 |
| HDAC3      | 0.006397 |
| ARHGAP19   | 0.006352 |
| MRPL20-DT  | 0.006351 |
| PTPRM      | 0.006333 |
| CAND1      | 0.006329 |

|            |          |
|------------|----------|
| TYW1       | 0.006294 |
| TMOD1      | 0.006261 |
| ARMCX6     | 0.006259 |
| AIFM3      | 0.006233 |
| ARL1       | 0.006176 |
| CREB3L4    | 0.00615  |
| DGCR6      | 0.006133 |
| FUNDC1     | 0.006124 |
| SDAD1      | 0.006123 |
| NUDT22     | 0.006043 |
| DONSON     | 0.006036 |
| TYSND1     | 0.006025 |
| LRATD1     | 0.006019 |
| B3GNT10    | 0.006005 |
| EIF3J-DT   | 0.005951 |
| SP3        | 0.005942 |
| CD99L2     | 0.005938 |
| ERCC6      | 0.005935 |
| C1RL       | 0.005913 |
| UBXN1      | 0.005899 |
| CCDC112    | 0.005897 |
| DDX27      | 0.005883 |
| HMGB1      | 0.005869 |
| OBSCN      | 0.005868 |
| ZNF316     | 0.005863 |
| RPL39P38   | 0.005837 |
| DEDD       | 0.005774 |
| TMEM50A    | 0.005737 |
| DLC1       | 0.005718 |
| NDUFV3     | 0.005711 |
| WARS2-AS1  | 0.005706 |
| IMPACT     | 0.005596 |
| HARS1      | 0.005555 |
| AC092651.1 | 0.005552 |
| SHOC2      | 0.005545 |
| AC073896.2 | 0.005524 |
| PRDX3      | 0.005493 |
| QRICH1     | 0.00549  |
| GATC       | 0.005482 |
| RAB14      | 0.005471 |
| GLYR1      | 0.005449 |
| CCNK       | 0.005428 |
| CA8        | 0.005423 |
| POLR3G     | 0.005398 |
| FZR1       | 0.005392 |
| FKTN       | 0.005383 |
| MRPL30     | 0.005371 |
| ANP32E     | 0.005355 |
| RALY       | 0.00534  |



|          |          |
|----------|----------|
| CUL1     | 0.005326 |
| FTL      | 0.005311 |
| NADK     | 0.005301 |
| IDH3G    | 0.005272 |
| CYP2S1   | 0.005251 |
| TPT1P4   | 0.00525  |
| BIRC2    | 0.005246 |
| GEM      | 0.005241 |
| INTS12   | 0.00524  |
| H3P14    | 0.00524  |
| FDXR     | 0.005201 |
| CNPPD1   | 0.005161 |
| NAP1L1P1 | 0.005158 |
| PSMD7    | 0.005126 |
| OSGEPL1  | 0.005119 |
| TRPM4    | 0.005096 |
| ZKSCAN4  | 0.005059 |
| TMEM42   | 0.005059 |
| INTS7    | 0.005052 |
| RNF44    | 0.005036 |
| MRPL18   | 0.005032 |
| FDFT1    | 0.005012 |
| PIGP     | 0.004999 |
| CFDP1    | 0.004997 |
| SF3B3    | 0.004974 |
| TRAPPC6A | 0.004973 |
| UQCR10   | 0.004963 |
| SLC27A3  | 0.004948 |
| CYP2J2   | 0.004926 |
| RPTOR    | 0.004911 |
| RNASEL   | 0.004874 |
| PPP1CA   | 0.004866 |
| SFR1     | 0.004848 |
| RBM27    | 0.004819 |
| DDX42    | 0.004803 |
| KTN1-AS1 | 0.004791 |
| AUTS2    | 0.004786 |
| DCAKD    | 0.004782 |
| IAH1     | 0.004778 |
| EP400    | 0.004765 |
| EIF2B5   | 0.004765 |
| ETFBKMT  | 0.004758 |
| SNX4     | 0.004686 |
| BGLAP    | 0.004659 |
| RMI1     | 0.004656 |
| CIAPIN1  | 0.004611 |
| NDUFB9   | 0.004586 |
| CLN3     | 0.004572 |
| ZNF232   | 0.004543 |

|            |          |
|------------|----------|
| LMBR1L     | 0.004536 |
| PDHA1      | 0.004527 |
| CSNK1G1    | 0.004459 |
| AC009812.4 | 0.004448 |
| CLP1       | 0.004437 |
| NDUFB3     | 0.004435 |
| MEOX1      | 0.00443  |
| AC073508.3 | 0.004422 |
| EEF1AKMT1  | 0.004374 |
| POMGNT2    | 0.004348 |
| KIAA0895   | 0.004309 |
| ZNF496     | 0.004259 |
| SERTAD3    | 0.004226 |
| PTCD2      | 0.004187 |
| ATP11B     | 0.004142 |
| KRT8P12    | 0.004131 |
| MAP3K7     | 0.004125 |
| TSSC4      | 0.00412  |
| EIF4G2     | 0.004109 |
| HPN        | 0.004109 |
| KIAA0753   | 0.004103 |
| ASPSCR1    | 0.004086 |
| SMC1B      | 0.004051 |
| ADCK2      | 0.004044 |
| Z99129.4   | 0.004038 |
| SLC25A17   | 0.004034 |
| PRNP       | 0.004031 |
| AC005076.1 | 0.004009 |
| PRR3       | 0.004006 |
| ATP5F1E    | 0.004    |
| HNRNPH3    | 0.003978 |
| DCP1A      | 0.003948 |
| SPTBN1     | 0.003945 |
| GPX1       | 0.003942 |
| RECQL5     | 0.003935 |
| DHX8       | 0.003895 |
| C5orf15    | 0.003883 |
| JMJD4      | 0.003857 |
| PHYH       | 0.003796 |
| WFDC3      | 0.003755 |
| PDE8A      | 0.003749 |
| C22orf23   | 0.003733 |
| CYCS       | 0.003733 |
| OTUB1      | 0.003728 |
| DPP9       | 0.003708 |
| STK31      | 0.003706 |
| ZFAND2B    | 0.003634 |
| ZNF148     | 0.003634 |
| OCEL1      | 0.003607 |

|              |          |
|--------------|----------|
| APTR         | 0.003582 |
| CD34         | 0.003581 |
| AC023043.3   | 0.003563 |
| CNOT3        | 0.003558 |
| MTND5P11     | 0.003553 |
| THAP3        | 0.003546 |
| OSER1        | 0.003538 |
| MAGOHB       | 0.003518 |
| R3HDM1       | 0.003506 |
| CTC-338M12.4 | 0.003498 |
| SRSF9        | 0.003491 |
| MOB3C        | 0.003467 |
| STX10        | 0.003465 |
| JADE1        | 0.003441 |
| FAU          | 0.0034   |
| SMIM5        | 0.003328 |
| COX8A        | 0.003322 |
| SETD9        | 0.003303 |
| PITPNB       | 0.003298 |
| DBR1         | 0.003289 |
| AC091492.1   | 0.003288 |
| SDC1         | 0.003279 |
| DRAP1        | 0.003276 |
| GTPBP4       | 0.003273 |
| MLEC         | 0.003262 |
| TMEM39A      | 0.003262 |
| FILIP1L      | 0.003256 |
| FAM107B      | 0.003233 |
| CTNBL1       | 0.003228 |
| ZSWIM8       | 0.003198 |
| MTRNR2L12    | 0.003183 |
| PCNP         | 0.003176 |
| TMEM51       | 0.003166 |
| LINC01426    | 0.003139 |
| PIAS3        | 0.003133 |
| SNX17        | 0.003126 |
| GLCE         | 0.003097 |
| CCDC12       | 0.003072 |
| TMEM147      | 0.003012 |
| KBTBD6       | 0.003006 |
| TCF20        | 0.002997 |
| CFL2         | 0.002985 |
| AC011511.5   | 0.002982 |
| CTU2         | 0.00298  |
| BRMS1        | 0.002971 |
| ZMYM3        | 0.002934 |
| ZNF786       | 0.002906 |
| AURKA        | 0.002897 |
| PMS2CL       | 0.002866 |

|            |          |
|------------|----------|
| RTL8B      | 0.002859 |
| EDEM3      | 0.002837 |
| ABHD8      | 0.002833 |
| EXOSC2     | 0.002823 |
| HLCS       | 0.002818 |
| COMMD10    | 0.002807 |
| METTL6     | 0.002789 |
| WASHC5     | 0.002757 |
| SERHL2     | 0.002713 |
| LETMD1     | 0.002708 |
| CEP57      | 0.002697 |
| AC007938.3 | 0.002691 |
| PRMT9      | 0.00269  |
| GABBR2     | 0.002663 |
| MRPL27     | 0.002638 |
| ZNF33B     | 0.002617 |
| EXT2       | 0.002611 |
| TSNAX      | 0.002598 |
| AFG3L2     | 0.002541 |
| ORC3       | 0.002535 |
| PRR16      | 0.002518 |
| ADAT1      | 0.002476 |
| PTPRA      | 0.002471 |
| RHBDD3     | 0.002437 |
| CNOT10     | 0.002436 |
| SLC9A8     | 0.002434 |
| ANKEF1     | 0.00242  |
| CYTH3      | 0.002376 |
| CAMKK2     | 0.002367 |
| PALB2      | 0.002364 |
| ETV1       | 0.002359 |
| ACAD9      | 0.002338 |
| PTPRE      | 0.00231  |
| TAOK3      | 0.002306 |
| GLA        | 0.0023   |
| SMN1       | 0.002292 |
| LINC00680  | 0.002291 |
| C10orf88   | 0.00229  |
| TMEM30B    | 0.002275 |
| ISY1       | 0.002254 |
| METTL21A   | 0.002252 |
| GABARAP    | 0.002241 |
| SYT7       | 0.002217 |
| APOL1      | 0.002163 |
| ZCWPW1     | 0.002147 |
| ENO2       | 0.002133 |
| CCDC92     | 0.002125 |
| TOPORS     | 0.002125 |
| SLC24A1    | 0.002125 |

|            |          |
|------------|----------|
| TAF5       | 0.002122 |
| TGFB1      | 0.00209  |
| VPS35      | 0.002082 |
| NAXE       | 0.002031 |
| PRKDC      | 0.002027 |
| HNRNPC     | 0.002015 |
| AL050341.2 | 0.002012 |
| PSMD1      | 0.001995 |
| ATP6V1F    | 0.001984 |
| DMRTA1     | 0.001974 |
| CRYAB      | 0.001967 |
| ATP5MPL    | 0.001914 |
| HMG2       | 0.001879 |
| AAMDC      | 0.001868 |
| VPS4A      | 0.001824 |
| RPL23AP2   | 0.001811 |
| ATP5PB     | 0.00181  |
| DCTPP1     | 0.001781 |
| LGALS1     | 0.001774 |
| RABEPK     | 0.00177  |
| STAP2      | 0.001749 |
| RNF111     | 0.001737 |
| PDHB       | 0.001702 |
| NTHL1      | 0.001689 |
| CCDC97     | 0.001655 |
| DCTN2      | 0.001654 |
| TSR2       | 0.001648 |
| MRPL38     | 0.001647 |
| FAM120AOS  | 0.001629 |
| CHSY1      | 0.001628 |
| AC055811.4 | 0.001628 |
| AC011472.4 | 0.001599 |
| CKAP5      | 0.001573 |
| POLH       | 0.001571 |
| MARCHF7    | 0.001545 |
| PCAT7      | 0.001526 |
| VWA2       | 0.001524 |
| MED22      | 0.001517 |
| GMEB1      | 0.001507 |
| SMCO4      | 0.001488 |
| ZNF142     | 0.001478 |
| SURF6      | 0.001409 |
| DHDH       | 0.001397 |
| SFXN1      | 0.001393 |
| PCGF3      | 0.001362 |
| KLHL2      | 0.001362 |
| RPS9       | 0.00135  |
| PDZD11     | 0.001349 |
| RUNX1      | 0.001345 |

|            |          |
|------------|----------|
| LAMA4      | 0.001268 |
| ANXA4      | 0.001231 |
| COA6       | 0.001217 |
| TPD52      | 0.001189 |
| ZNF341     | 0.001152 |
| TMEM223    | 0.001131 |
| GOLGA5     | 0.001113 |
| TIE1       | 0.001094 |
| ZNF605     | 0.001082 |
| DOCK1      | 0.001078 |
| HTATSF1    | 0.001053 |
| FBXL17     | 0.001023 |
| THOP1      | 0.001005 |
| NDUFB6     | 0.000987 |
| ZNF414     | 0.000895 |
| NUDT16     | 0.000813 |
| FRYL       | 0.0008   |
| SRPK2      | 0.000793 |
| THEM6      | 0.000778 |
| USO1       | 0.000765 |
| ACOX2      | 0.000724 |
| SUPT6H     | 0.000671 |
| AC005670.3 | 0.000668 |
| RAB11B     | 0.000662 |
| SRRT       | 0.000625 |
| AXIN1      | 0.000586 |
| FAM160B1   | 0.000584 |
| MED29      | 0.000576 |
| C12orf29   | 0.000491 |
| ZFP41      | 0.000479 |
| DPP4-DT    | 0.000476 |
| ADGRG6     | 0.000471 |
| PCDHB11    | 0.000466 |
| NUP188     | 0.00046  |
| LDB1       | 0.000444 |
| ARHGAP42   | 0.000381 |
| LY6E       | 0.00034  |
| ZNF358     | 0.00033  |
| AL137784.1 | 0.000304 |
| RNLS       | 0.000281 |
| UBE2R2     | 0.000246 |
| TOP1       | 0.000198 |
| PPP1R7     | 0.000196 |
| DPP3       | 0.000196 |
| ZC3H11A    | 0.000172 |
| SLC25A38   | 0.000171 |
| NONO       | 0.000166 |
| NAGPA      | 8.44E-05 |
| CALCOCO2   | 7.50E-05 |

|            |          |
|------------|----------|
| UFD1       | 7.38E-05 |
| RAB3B      | 5.92E-05 |
| MYLK       | 4.54E-05 |
| AC004918.1 | 1.41E-05 |
| ARFGAP3    | #####    |
| YIPF4      | #####    |
| BAZ2A      | -0.0001  |
| DSC3       | -0.00011 |
| SETD6      | -0.00013 |
| ZBTB41     | -0.00013 |
| GNAQ       | -0.00014 |
| AZI2       | -0.00014 |
| TBC1D23    | -0.00016 |
| STK39      | -0.00018 |
| USP10      | -0.00019 |
| AC144530.1 | -0.00021 |
| TOM1L2     | -0.00025 |
| LINC02585  | -0.00029 |
| RHOT1      | -0.00029 |
| MXD4       | -0.0003  |
| BCS1L      | -0.00032 |
| HERC3      | -0.00032 |
| EMCN       | -0.00033 |
| AP002336.2 | -0.00037 |
| CLNS1A     | -0.00039 |
| HNRNPH2    | -0.00039 |
| TMEM68     | -0.0004  |
| PRMT3      | -0.00041 |
| ATP6V1E1   | -0.00044 |
| AC106900.1 | -0.00048 |
| OAS3       | -0.00055 |
| TXNRD3     | -0.00058 |
| INAFM2     | -0.00059 |
| RIOX2      | -0.00059 |
| GAN        | -0.00064 |
| CREBBP     | -0.00065 |
| C19orf54   | -0.00072 |
| SFT2D1     | -0.00075 |
| GLT8D1     | -0.00082 |
| FAM234B    | -0.00083 |
| MOCS3      | -0.00083 |
| RPL9P29    | -0.00087 |
| PPP1R8     | -0.00093 |
| KCNQ1      | -0.00097 |
| TUBGCP2    | -0.00098 |
| COG4       | -0.00106 |
| SNAP23     | -0.00107 |
| FTLP14     | -0.00112 |
| HHATL      | -0.00112 |

|            |          |
|------------|----------|
| LLPH       | -0.00118 |
| NSRP1      | -0.00119 |
| PGAP4      | -0.0012  |
| TPST1      | -0.00123 |
| PRTFDC1    | -0.00126 |
| N6AMT1     | -0.0013  |
| NDUFAF1    | -0.0013  |
| SMCR8      | -0.00131 |
| GTF2IP20   | -0.00135 |
| UBR1       | -0.00137 |
| GPR108     | -0.00138 |
| MPV17L2    | -0.00138 |
| RPL34      | -0.00141 |
| PCDHGC3    | -0.00141 |
| PDCD7      | -0.00146 |
| LINC00239  | -0.00151 |
| EPDR1      | -0.00152 |
| PEX1       | -0.00153 |
| PRKAR1A    | -0.00155 |
| PRKCSH     | -0.00158 |
| PSMA2      | -0.00158 |
| RABGAP1    | -0.0016  |
| DGCR8      | -0.0016  |
| GLRB       | -0.00162 |
| NAE1       | -0.00165 |
| BRD8       | -0.00169 |
| RPS28P4    | -0.00174 |
| PLA2G4F    | -0.00176 |
| CNOT4      | -0.00178 |
| AC122688.3 | -0.0018  |
| VAMP7      | -0.00181 |
| ATP6V0E1   | -0.00182 |
| AC074117.1 | -0.00185 |
| RAD23A     | -0.00186 |
| ETFDH      | -0.00186 |
| PPID       | -0.00188 |
| MMS22L     | -0.00194 |
| NDFIP1     | -0.00197 |
| SH3D19     | -0.00198 |
| SNAPC5     | -0.00201 |
| DOHH       | -0.00203 |
| DENND2B    | -0.00203 |
| DYNC1H1    | -0.00205 |
| TRNAU1AP   | -0.00206 |
| ZNF134     | -0.00208 |
| TUBG2      | -0.00209 |
| RBM12      | -0.00211 |
| PLD2       | -0.00212 |
| SFMBT1     | -0.00214 |



|            |          |
|------------|----------|
| HDAC1      | -0.00215 |
| MRGPRF     | -0.00216 |
| MRPS33     | -0.00216 |
| TPGS2      | -0.00224 |
| KIAA0319L  | -0.00225 |
| ZNF48      | -0.00226 |
| CCNI       | -0.00226 |
| FOXA3      | -0.00226 |
| ANXA7      | -0.00227 |
| ST3GAL1    | -0.00227 |
| FRA10AC1   | -0.0023  |
| PSMD3      | -0.00236 |
| FADS1      | -0.00239 |
| AL928654.1 | -0.0024  |
| GTF2H4     | -0.00244 |
| CCNG2      | -0.00245 |
| PPA1       | -0.00246 |
| AC108134.2 | -0.00251 |
| UBR4       | -0.00251 |
| AKR1E2     | -0.00253 |
| GPAM       | -0.00254 |
| KAT6B      | -0.00255 |
| SARS2      | -0.00255 |
| CNPY3      | -0.00259 |
| TRIB2      | -0.00259 |
| MEGF6      | -0.0026  |
| NAF1       | -0.00262 |
| CFAP97     | -0.00263 |
| SALL2      | -0.00266 |
| TSPEAR-AS1 | -0.00266 |
| APPBP2     | -0.00267 |
| ACTR6      | -0.00269 |
| FEM1C      | -0.00269 |
| PXMP4      | -0.00272 |
| AVIL       | -0.00272 |
| CERS5      | -0.00274 |
| RRAGC      | -0.00274 |
| FYTTD1     | -0.00275 |
| DEDD2      | -0.00275 |
| MFAP3      | -0.00276 |
| MINDY1     | -0.00281 |
| LCMT1      | -0.00286 |
| HK2        | -0.00286 |
| C6orf62    | -0.00288 |
| CCZ1       | -0.00292 |
| HTRA3      | -0.00292 |
| LPAL2      | -0.00292 |
| PPIH       | -0.00294 |
| WIZ        | -0.00294 |

|            |          |
|------------|----------|
| KIF22      | -0.00296 |
| NOSIP      | -0.00299 |
| SMAD2      | -0.00299 |
| RMND5B     | -0.00301 |
| HM13       | -0.00304 |
| DR1        | -0.00305 |
| PLBD1-AS1  | -0.0032  |
| TRAK1      | -0.00322 |
| VPS53      | -0.00322 |
| NDUFC2     | -0.00323 |
| CCNT1      | -0.00323 |
| TTL        | -0.00326 |
| DDX20      | -0.00328 |
| NEIL2      | -0.00328 |
| GPR89A     | -0.0033  |
| RBCK1      | -0.00331 |
| MGST3      | -0.00332 |
| SH3GLB1    | -0.00332 |
| ADTRP      | -0.00334 |
| DYSF       | -0.00334 |
| EIPR1      | -0.00336 |
| FDX2       | -0.00339 |
| CDK11B     | -0.00341 |
| MISP3      | -0.00342 |
| IL18       | -0.00348 |
| OBI1       | -0.00348 |
| BDKRB1     | -0.00351 |
| STX12      | -0.00352 |
| MRPL39     | -0.00353 |
| ATG5       | -0.00354 |
| LINC01637  | -0.00356 |
| COQ9       | -0.00357 |
| UTP14C     | -0.00359 |
| OR2A1-AS1  | -0.00362 |
| SCAF4      | -0.00363 |
| MT-ND4     | -0.0037  |
| C2CD2      | -0.00373 |
| UBE2D2     | -0.00374 |
| TMEM203    | -0.00377 |
| CSNK1G3    | -0.00379 |
| LGALS3BP   | -0.00381 |
| CMIP       | -0.00383 |
| PDHX       | -0.00385 |
| AC008280.2 | -0.00385 |
| WLS        | -0.00386 |
| NCAPD3     | -0.00386 |
| VTI1B      | -0.0039  |
| VSTM4      | -0.0039  |
| COPS7B     | -0.00392 |

|            |          |
|------------|----------|
| SLC16A8    | -0.00397 |
| AL118506.1 | -0.00397 |
| CDKN3      | -0.00398 |
| NAA25      | -0.004   |
| C19orf53   | -0.004   |
| RFWD3      | -0.00404 |
| FRGCA      | -0.00409 |
| EMD        | -0.00413 |
| LRRC75B    | -0.00416 |
| XAB2       | -0.00418 |
| PMS2       | -0.00422 |
| PPP1R37    | -0.00424 |
| THAP2      | -0.00425 |
| AC008537.2 | -0.00425 |
| ZNF28      | -0.00425 |
| CARM1      | -0.00426 |
| STX8       | -0.00426 |
| SMARCA5    | -0.00427 |
| AL596244.1 | -0.00428 |
| IP6K2      | -0.0043  |
| IQANK1     | -0.00432 |
| GPN2       | -0.00433 |
| C1orf174   | -0.00439 |
| TRMT1L     | -0.00442 |
| SLC25A11   | -0.00442 |
| U2SURP     | -0.00443 |
| RBM18      | -0.00445 |
| METTL18    | -0.0045  |
| ERC1       | -0.00452 |
| ZBED8      | -0.00452 |
| SSNA1      | -0.00454 |
| DNAL4      | -0.00455 |
| LZIC       | -0.00455 |
| MMP2       | -0.00455 |
| ATP5PF     | -0.00457 |
| RAB9A      | -0.00459 |
| DPM3       | -0.00464 |
| RPS6KC1    | -0.00465 |
| C1orf210   | -0.00465 |
| LINC02560  | -0.00468 |
| PPIG       | -0.00469 |
| PRRC2C     | -0.00469 |
| SRP9       | -0.0047  |
| GADD45GIP1 | -0.00473 |
| GID4       | -0.00475 |
| MCL1       | -0.00478 |
| KIAA1143   | -0.00478 |
| SUMO1      | -0.00481 |
| PARD3B     | -0.00482 |

|            |          |
|------------|----------|
| PINK1-AS   | -0.00483 |
| RNF126     | -0.00484 |
| ENTR1      | -0.00486 |
| TMEM216    | -0.00488 |
| ZNF704     | -0.00488 |
| ALG2       | -0.00489 |
| ATP5PO     | -0.00494 |
| TSPAN18    | -0.00494 |
| FCF1       | -0.00499 |
| CSRP2      | -0.00504 |
| CDKN2B     | -0.00505 |
| GDE1       | -0.00509 |
| AEN        | -0.00512 |
| AC022018.1 | -0.00519 |
| DCPS       | -0.0052  |
| TRIM41     | -0.0052  |
| DPY19L4    | -0.0052  |
| RBM10      | -0.00521 |
| TTLL1      | -0.00528 |
| PDPR       | -0.00531 |
| PSMA7      | -0.00532 |
| SCARF1     | -0.00532 |
| DIS3       | -0.00533 |
| APBA1      | -0.00534 |
| AC092171.3 | -0.00534 |
| CISD1      | -0.00536 |
| AC073569.2 | -0.0054  |
| TTPAL      | -0.00542 |
| BNIP3L     | -0.00543 |
| CDC42      | -0.00544 |
| NUP133     | -0.00547 |
| UNC93B1    | -0.00548 |
| IGF2R      | -0.00548 |
| REPS2      | -0.00549 |
| C12orf66   | -0.00549 |
| AGK        | -0.0055  |
| DSEL       | -0.00551 |
| ADI1       | -0.00551 |
| RPL10P16   | -0.00553 |
| SLC35A5    | -0.00555 |
| PSMB1      | -0.00556 |
| PRANCR     | -0.0056  |
| COX7B2     | -0.0056  |
| CLEC5A     | -0.00561 |
| TRMT2A     | -0.00562 |
| SUV39H2    | -0.00564 |
| SUZ12      | -0.00565 |
| RIPK1      | -0.00572 |
| NTAQ1      | -0.00577 |

|            |          |
|------------|----------|
| SH3PXD2B   | -0.00579 |
| SFPQ       | -0.0058  |
| DPCD       | -0.00582 |
| CTBS       | -0.00584 |
| PPIL4      | -0.00584 |
| ZNF470     | -0.00585 |
| PYCR3      | -0.00586 |
| DBNL       | -0.00586 |
| ILF3       | -0.0059  |
| MAVS       | -0.00591 |
| KLHL18     | -0.00592 |
| AL441992.1 | -0.00592 |
| VPS33B     | -0.00594 |
| GTF2H1     | -0.00595 |
| B3GNTL1    | -0.00597 |
| SLX4       | -0.00597 |
| RUNDC1     | -0.00599 |
| PLCH1      | -0.006   |
| PDZD8      | -0.00601 |
| SPEG       | -0.00602 |
| NEDD1      | -0.00602 |
| AL627309.6 | -0.00606 |
| TMEM218    | -0.00607 |
| KIT        | -0.00611 |
| PLEKHA5    | -0.00612 |
| MRPS36     | -0.00614 |
| NCAPH2     | -0.00614 |
| ST20       | -0.00615 |
| CHMP4B     | -0.00616 |
| NDUFB11    | -0.00627 |
| PTMA       | -0.00629 |
| UBOX5      | -0.00629 |
| C19orf47   | -0.00634 |
| TMEM41B    | -0.00634 |
| REEP4      | -0.00635 |
| AC022306.2 | -0.00642 |
| ABR        | -0.00643 |
| GSS        | -0.00645 |
| ACTR1B     | -0.00646 |
| PARN       | -0.00653 |
| ROGDI      | -0.00656 |
| ENPP5      | -0.00664 |
| LIMS1      | -0.00666 |
| MRPS5      | -0.00666 |
| TBC1D25    | -0.00668 |
| FAN1       | -0.00668 |
| SRCAP      | -0.00674 |
| DNAJB11    | -0.00674 |
| FBXO32     | -0.00677 |

|            |          |
|------------|----------|
| ALKBH8     | -0.00678 |
| RUFY1      | -0.00681 |
| SFXN5      | -0.00691 |
| TAF4       | -0.00693 |
| ORAI3      | -0.00694 |
| JADE3      | -0.00697 |
| SLC46A1    | -0.00697 |
| ZNF318     | -0.00698 |
| NUP35      | -0.00698 |
| DCTN6      | -0.00699 |
| CENPM      | -0.00701 |
| MRPL44     | -0.00701 |
| AC092295.2 | -0.00706 |
| SCRN2      | -0.00714 |
| FEZ1       | -0.00717 |
| COMMD2     | -0.00718 |
| IER3-AS1   | -0.00721 |
| EFL1       | -0.00722 |
| DENND5B    | -0.00722 |
| CPLX1      | -0.00723 |
| MTFR1L     | -0.00725 |
| EXOSC4     | -0.00728 |
| TSC22D1    | -0.00728 |
| ARHGAP35   | -0.0073  |
| SLC25A4    | -0.0073  |
| SLX4IP     | -0.00734 |
| NCOA5      | -0.00734 |
| FXN        | -0.00735 |
| SPPL2A     | -0.00737 |
| ARMC5      | -0.0074  |
| PMM2       | -0.00743 |
| SAP18      | -0.00744 |
| MYDGF      | -0.00746 |
| ALDH9A1    | -0.00748 |
| SFXN2      | -0.00749 |
| SLC15A4    | -0.00749 |
| MAP4K3     | -0.00753 |
| AC010326.3 | -0.00754 |
| RPL39P40   | -0.00755 |
| PSMC4      | -0.0076  |
| FBLN5      | -0.00761 |
| ZBED1      | -0.00763 |
| DDX55      | -0.00764 |
| TIMM8B     | -0.00767 |
| ZNF793-AS1 | -0.00772 |
| UBALD2     | -0.00775 |
| SNRNP48    | -0.00776 |
| TMEM220    | -0.00777 |
| MIR200B    | -0.00777 |

|            |          |
|------------|----------|
| PYCR2      | -0.00778 |
| SCYL2      | -0.00779 |
| SPRYD4     | -0.0078  |
| SLC25A26   | -0.00784 |
| SLC1A5     | -0.00787 |
| ANAPC1     | -0.00789 |
| GRPEL2     | -0.0079  |
| PIGG       | -0.00793 |
| SF1        | -0.00795 |
| ATXN1L     | -0.00795 |
| CPT1C      | -0.00798 |
| PHF3       | -0.00798 |
| PANK4      | -0.008   |
| TUBD1      | -0.00805 |
| FAM214B    | -0.00806 |
| MAF1       | -0.00807 |
| IDH3B      | -0.0081  |
| TIMM29     | -0.0081  |
| AL157932.1 | -0.00811 |
| PLEKHM2    | -0.00812 |
| GBP3       | -0.00813 |
| UBXN7      | -0.00813 |
| TSPAN31    | -0.00814 |
| TOP1MT     | -0.00815 |
| RPL3P4     | -0.00817 |
| LRATD2     | -0.00817 |
| NUDT8      | -0.0082  |
| TNFRSF8    | -0.00821 |
| MBLAC2     | -0.00821 |
| PHRF1      | -0.00823 |
| RPS5       | -0.00824 |
| TIGD2      | -0.00826 |
| FAM199X    | -0.00828 |
| NAIF1      | -0.00829 |
| SMAD7      | -0.0083  |
| TOR1AIP1   | -0.00834 |
| ARPC2      | -0.00835 |
| TDRP       | -0.00837 |
| PPA2       | -0.00845 |
| ZNF436     | -0.00846 |
| AC009318.2 | -0.00849 |
| VEZT       | -0.00855 |
| KATNB1     | -0.00859 |
| HINT3      | -0.00863 |
| SMAD5      | -0.00867 |
| AARS1      | -0.00868 |
| POGZ       | -0.00868 |
| AFDN       | -0.00868 |
| FOXRED2    | -0.00869 |

|            |          |
|------------|----------|
| COL27A1    | -0.0087  |
| TSHZ3      | -0.00871 |
| ZRANB1     | -0.00876 |
| CLPX       | -0.00877 |
| DHX36      | -0.00879 |
| NTPCR      | -0.00882 |
| AIMP1      | -0.00885 |
| HPSE       | -0.00885 |
| KIAA1958   | -0.00888 |
| SEC23B     | -0.00891 |
| C4orf3     | -0.00893 |
| GET3       | -0.00895 |
| HNRNPM     | -0.00897 |
| VANGL2     | -0.00898 |
| GGA3       | -0.00903 |
| CFAP298    | -0.00905 |
| AC129507.2 | -0.00905 |
| RGP1       | -0.00905 |
| CCDC43     | -0.00906 |
| FUCA2      | -0.00907 |
| MCM8       | -0.00909 |
| STK26      | -0.00909 |
| SUPT7L     | -0.0091  |
| AUP1       | -0.0091  |
| MAP1LC3B2  | -0.0091  |
| NBPF15     | -0.0091  |
| LINC01655  | -0.00911 |
| PIGB       | -0.00911 |
| AHSA1      | -0.00913 |
| AC120498.4 | -0.00916 |
| RPS23      | -0.00918 |
| TIMM13     | -0.00919 |
| C20orf27   | -0.00919 |
| MIR429     | -0.0092  |
| P4HTM      | -0.00921 |
| MKLN1-AS   | -0.00921 |
| PAXIP1     | -0.00922 |
| LRG1       | -0.00923 |
| TRAF3IP2   | -0.00923 |
| CCNYL1     | -0.00928 |
| MSH2       | -0.00928 |
| GORASP1    | -0.00928 |
| ENTPD6     | -0.0093  |
| PDGFRL     | -0.00931 |
| EMP2       | -0.00933 |
| VPS26B     | -0.00934 |
| MRPS23     | -0.00935 |
| SEPHS1     | -0.00941 |
| UBAC2-AS1  | -0.00941 |



|            |          |
|------------|----------|
| ADAMTS16   | -0.00942 |
| HIP1R      | -0.00944 |
| PROSER1    | -0.00946 |
| SURF1      | -0.00951 |
| ALG14      | -0.00952 |
| COA3       | -0.00956 |
| ZC3H7B     | -0.00958 |
| DHX38      | -0.00959 |
| TUBGCP5    | -0.0096  |
| SDF2       | -0.00964 |
| SPSB3      | -0.00965 |
| CRIM1-DT   | -0.00968 |
| ULK3       | -0.00968 |
| HNRNPF     | -0.00969 |
| SGSM2      | -0.00969 |
| TMEM62     | -0.00972 |
| ZNF16      | -0.00974 |
| EIF3F      | -0.00978 |
| KCNAB1     | -0.00978 |
| BRPF1      | -0.0098  |
| TXN2       | -0.00982 |
| INTS5      | -0.00983 |
| CHIC2      | -0.0099  |
| TANGO2     | -0.0099  |
| DCAF7      | -0.0099  |
| FBR5       | -0.00991 |
| MDH1       | -0.00992 |
| TMEM9B     | -0.00994 |
| PCMT1      | -0.00995 |
| UBASH3B    | -0.00997 |
| MDK        | -0.00998 |
| NUP160     | -0.01002 |
| FAM174A    | -0.01006 |
| RNF149     | -0.0101  |
| AP001542.1 | -0.0101  |
| PRPF31     | -0.01011 |
| ZSCAN20    | -0.01013 |
| OXLD1      | -0.01014 |
| CAMK2D     | -0.01018 |
| USP32      | -0.01019 |
| WDR91      | -0.0102  |
| GTPBP8     | -0.0102  |
| MTOR       | -0.0102  |
| TCEAL4     | -0.01021 |
| RPLP0      | -0.01023 |
| NEFH       | -0.01025 |
| LONP2      | -0.01026 |
| LPGAT1     | -0.01026 |
| LMF2       | -0.01031 |

|            |          |
|------------|----------|
| CD2BP2     | -0.01035 |
| AC091982.3 | -0.01036 |
| LNPB       | -0.01036 |
| ARFIP2     | -0.01036 |
| IQCH-AS1   | -0.01037 |
| WAC        | -0.01038 |
| NANS       | -0.01044 |
| COMMD6     | -0.01046 |
| LONRF3     | -0.01047 |
| FASTKD2    | -0.01048 |
| EEF1B2     | -0.01054 |
| TP53I11    | -0.01054 |
| POLR3B     | -0.01054 |
| ELMOD2     | -0.01058 |
| RAB33B     | -0.0106  |
| UHMK1      | -0.0106  |
| ZNF576     | -0.01061 |
| GTF2IP13   | -0.01062 |
| RPL39      | -0.01063 |
| BDNF-AS    | -0.01065 |
| TBX4       | -0.01066 |
| SDE2       | -0.01075 |
| TSEN54     | -0.0108  |
| DYNC1LI2   | -0.01081 |
| AGPAT5     | -0.01083 |
| AC084824.4 | -0.01094 |
| AC073896.4 | -0.01095 |
| PRIMPOL    | -0.01095 |
| SERINC1    | -0.01097 |
| HNRNPL     | -0.01098 |
| CAPN13     | -0.01099 |
| NKRF       | -0.011   |
| ATG13      | -0.01101 |
| CACTIN     | -0.01103 |
| ARFGAP2    | -0.01106 |
| RPL3       | -0.01107 |
| AGR3       | -0.01108 |
| RPS15AP11  | -0.01111 |
| AC006213.4 | -0.01112 |
| AKR1A1     | -0.01115 |
| TTC3       | -0.01115 |
| NDE1       | -0.01116 |
| ACVR1B     | -0.01118 |
| MICOS13    | -0.0112  |
| SIAH2      | -0.0112  |
| SETD1B     | -0.01121 |
| BLOC1S1    | -0.01121 |
| CASTOR1    | -0.01122 |
| TRNP1      | -0.01122 |

|             |          |
|-------------|----------|
| TRPV4       | -0.01123 |
| NOP56       | -0.01124 |
| LACTB2      | -0.01128 |
| AC104667.2  | -0.0113  |
| CYTL1       | -0.0113  |
| SYNPO       | -0.01131 |
| ZFP69       | -0.01131 |
| PTMS        | -0.01132 |
| AL031667.3  | -0.01132 |
| POLE        | -0.01133 |
| SMARCA4     | -0.01133 |
| NUP58       | -0.01138 |
| PCCA        | -0.01139 |
| HOXC9       | -0.0114  |
| GOLGA1      | -0.01141 |
| ZNF692      | -0.01141 |
| PPP2R5B     | -0.01142 |
| HERPUD2     | -0.01144 |
| AC022400.1  | -0.01151 |
| GUSB        | -0.01151 |
| PET117      | -0.01153 |
| BFAR        | -0.01164 |
| MAP1A       | -0.01165 |
| SRR         | -0.01166 |
| HMGN2P5     | -0.01166 |
| CDC42P6     | -0.01166 |
| MYD88       | -0.01168 |
| AMER1       | -0.01176 |
| AP001972.5  | -0.01176 |
| RASGEF1A    | -0.01179 |
| NUP98       | -0.01179 |
| HSD3B7      | -0.0118  |
| ATP6V1G1    | -0.01181 |
| BMPR2       | -0.01182 |
| C2orf68     | -0.01183 |
| NUDCD1      | -0.01184 |
| BABAM1      | -0.0119  |
| AC073063.1  | -0.01192 |
| PHF19       | -0.01194 |
| ENTPD5      | -0.01198 |
| CDK9        | -0.01198 |
| ZNF418      | -0.01199 |
| DCAF16      | -0.012   |
| AC007688.1  | -0.01202 |
| EEF1A1      | -0.01202 |
| AC005476.2  | -0.01202 |
| FAM219B     | -0.01202 |
| B4GALT1-AS1 | -0.01205 |
| IFT20       | -0.0121  |

|               |          |
|---------------|----------|
| AC007342.9    | -0.0121  |
| PLXNA3        | -0.01211 |
| RBAK          | -0.01211 |
| WDR45         | -0.01212 |
| OSGIN2        | -0.01217 |
| RPL7P32       | -0.0122  |
| TUG1          | -0.01221 |
| COX14         | -0.01225 |
| POLR3K        | -0.01225 |
| SPCS1         | -0.01226 |
| ZBED5-AS1     | -0.0123  |
| PARP3         | -0.0123  |
| AC069307.1    | -0.01231 |
| SETD1A        | -0.01232 |
| EIF4E         | -0.01233 |
| ACTR2         | -0.01234 |
| THAP11        | -0.01236 |
| RMND1         | -0.01237 |
| NDUFA8        | -0.01239 |
| FCHO1         | -0.01241 |
| HIGD2A        | -0.01242 |
| MCTS1         | -0.01245 |
| AC009948.2    | -0.01253 |
| TRAM1L1       | -0.01254 |
| TNFRSF10A-AS1 | -0.01257 |
| DNAJC7        | -0.01258 |
| PCGF6         | -0.01259 |
| ETHE1         | -0.01262 |
| SAMD10        | -0.01264 |
| CWF19L2       | -0.01264 |
| FAM114A2      | -0.01265 |
| CROT          | -0.01266 |
| POLR3D        | -0.01266 |
| LRCH4         | -0.01266 |
| AC096677.1    | -0.01268 |
| EPB41L4B      | -0.01271 |
| TSPYL1        | -0.01275 |
| H2AZ1         | -0.0128  |
| EAF1          | -0.01283 |
| OSTC          | -0.01285 |
| H3C6          | -0.01285 |
| RPS4X         | -0.01287 |
| NENF          | -0.01289 |
| HNRNPA1P16    | -0.01289 |
| TRIOBP        | -0.01289 |
| LMCD1         | -0.0129  |
| ZNF740        | -0.01295 |
| CLPTM1L       | -0.01298 |
| PWWP2A        | -0.01298 |

|            |          |
|------------|----------|
| INKA1      | -0.01302 |
| UBAP2      | -0.01302 |
| CLCN4      | -0.01308 |
| CWC15      | -0.01314 |
| ATP5MC3    | -0.01319 |
| AL121949.1 | -0.01321 |
| SNRPF      | -0.01326 |
| TOLLIP     | -0.01332 |
| LRP10      | -0.01332 |
| TBL1XR1    | -0.01338 |
| TECPR2     | -0.01343 |
| ACOT9      | -0.01347 |
| ARX        | -0.01347 |
| DEGS1      | -0.0135  |
| TEX2       | -0.0135  |
| PIIP5K1    | -0.01353 |
| DUSP3      | -0.01357 |
| DIPK1B     | -0.01362 |
| OTUD5      | -0.01363 |
| LUM        | -0.01365 |
| PGP        | -0.01366 |
| SMIM7      | -0.01367 |
| SKP1P1     | -0.01372 |
| WDR5B      | -0.01372 |
| AP1AR      | -0.01375 |
| TMEM179B   | -0.01375 |
| RIF1       | -0.0138  |
| GPR137     | -0.01381 |
| JOSD1      | -0.01382 |
| C4A        | -0.01385 |
| RBP7       | -0.01387 |
| WDR12      | -0.01394 |
| COX6A1     | -0.01394 |
| PIK3CA     | -0.01395 |
| RNASEH1    | -0.01396 |
| LRP6       | -0.01396 |
| FH         | -0.01399 |
| BICC1      | -0.01399 |
| SP2        | -0.014   |
| POLG       | -0.014   |
| BANP       | -0.01403 |
| TMED2      | -0.01403 |
| DCP1B      | -0.01404 |
| RECQL4     | -0.01404 |
| ARMCX3     | -0.01406 |
| NAA10      | -0.01407 |
| BCL3       | -0.01408 |
| MTA2       | -0.01411 |
| POLR1E     | -0.01411 |

|            |          |
|------------|----------|
| RPL31      | -0.01414 |
| ACTR5      | -0.01414 |
| ITGAV      | -0.01415 |
| EMC8       | -0.01416 |
| MED4       | -0.01417 |
| EEF1A1P5   | -0.01419 |
| DGUOK      | -0.01419 |
| MVK        | -0.01419 |
| TOMM7      | -0.01424 |
| FAM32A     | -0.0143  |
| BTBD3      | -0.0143  |
| CTCF       | -0.01434 |
| VPS51      | -0.01434 |
| AC022098.2 | -0.01434 |
| SDAD1P1    | -0.01436 |
| DPH3       | -0.01437 |
| AC074135.1 | -0.01438 |
| C9orf85    | -0.01449 |
| C16orf72   | -0.01451 |
| TMEM117    | -0.01451 |
| AC007998.3 | -0.01452 |
| SELENOT    | -0.01452 |
| ZNF607     | -0.01452 |
| CCDC186    | -0.01459 |
| ARL8A      | -0.01459 |
| MFN1       | -0.01461 |
| FAM168A    | -0.0147  |
| PRELID3A   | -0.0147  |
| UBE2B      | -0.01471 |
| CYP27C1    | -0.01475 |
| EPS15L1    | -0.01476 |
| ENDOG      | -0.01479 |
| KPTN       | -0.01481 |
| FBXO8      | -0.01481 |
| ZDHHC16    | -0.01481 |
| HPRT1      | -0.01483 |
| GRN        | -0.01483 |
| L3MBTL2    | -0.01484 |
| PCIF1      | -0.01485 |
| MLLT1      | -0.01486 |
| ULK2       | -0.01487 |
| MIF4GD     | -0.0149  |
| JOSD2      | -0.01493 |
| ZNF592     | -0.01501 |
| DTD1       | -0.01503 |
| EPC2       | -0.01504 |
| ZFYVE1     | -0.01505 |
| EIF2AK2    | -0.01506 |
| FOCAD      | -0.01506 |

|            |          |
|------------|----------|
| ARHGEF9    | -0.01508 |
| YPEL5      | -0.01511 |
| NEU1       | -0.01513 |
| TBC1D5     | -0.01517 |
| MTBP       | -0.01517 |
| SUPT4H1    | -0.01521 |
| BCKDK      | -0.01521 |
| PAQR8      | -0.01524 |
| UCKL1      | -0.01526 |
| FBXO30     | -0.01529 |
| ELOA-AS1   | -0.0153  |
| TGDS       | -0.01536 |
| DIPK2B     | -0.01542 |
| GFOD2      | -0.01545 |
| SLC39A3    | -0.01546 |
| AMMECR1    | -0.01547 |
| RLIM       | -0.01547 |
| HIBCH      | -0.01548 |
| DCTN5      | -0.01548 |
| WDR26      | -0.01552 |
| CCL21      | -0.01553 |
| ZNF394     | -0.01554 |
| INPP1      | -0.01556 |
| EIF1AX     | -0.01556 |
| NBPF14     | -0.01558 |
| AMZ2       | -0.01558 |
| NAP1L3     | -0.0156  |
| RIPOR1     | -0.01565 |
| H2BC20P    | -0.01565 |
| PRMT1      | -0.01566 |
| SLC5A3     | -0.01567 |
| SEC24D     | -0.01567 |
| SNX27      | -0.01568 |
| KCNC3      | -0.01568 |
| MCM3AP     | -0.01569 |
| AGGF1      | -0.01571 |
| RBM4B      | -0.01571 |
| MUS81      | -0.01571 |
| SF3A2      | -0.01571 |
| PTGES2     | -0.01576 |
| COQ8A      | -0.01578 |
| PCDHGB2    | -0.01578 |
| PAK1IP1    | -0.01579 |
| ERVE-1     | -0.0158  |
| AL033519.3 | -0.01581 |
| NR2C2AP    | -0.01583 |
| ZNRF2P1    | -0.01588 |
| RHBDF2     | -0.01589 |
| PREPL      | -0.0159  |

|            |          |
|------------|----------|
| HNRNPA2B1  | -0.0159  |
| SPECC1L    | -0.01593 |
| PCDHB12    | -0.01596 |
| PSEN2      | -0.01596 |
| NCKAP5L    | -0.01597 |
| TELO2      | -0.01597 |
| AC040160.1 | -0.01598 |
| CENPBD1    | -0.016   |
| ETV4       | -0.01601 |
| GOLGB1     | -0.01603 |
| TLK2       | -0.01604 |
| PPP1R3C    | -0.01605 |
| MAPKAPK2   | -0.01607 |
| NAPA       | -0.01618 |
| INAFM1     | -0.01619 |
| CDK2AP2    | -0.01619 |
| ZNF343     | -0.01619 |
| AFF4       | -0.0162  |
| ABCA2      | -0.01624 |
| TAOK2      | -0.01626 |
| DHRS3      | -0.01628 |
| HHAT       | -0.0163  |
| MRFAP1L1   | -0.01632 |
| NFIL3      | -0.01633 |
| EXOC3-AS1  | -0.0164  |
| RWDD3      | -0.0164  |
| SRBD1      | -0.01644 |
| MMGT1      | -0.01644 |
| NPR1       | -0.01645 |
| AP5Z1      | -0.01649 |
| PLVAP      | -0.01649 |
| FAM133B    | -0.0165  |
| AC068888.1 | -0.01651 |
| PSMA4      | -0.01651 |
| PYURF      | -0.01651 |
| TTC38      | -0.01658 |
| TMEM150A   | -0.01662 |
| OR7E14P    | -0.01662 |
| PHGDH      | -0.01662 |
| ZNF200     | -0.01662 |
| NFU1       | -0.01663 |
| SDHB       | -0.01667 |
| ITCH       | -0.01668 |
| TMEM192    | -0.01668 |
| RNF185     | -0.0167  |
| RPP25L     | -0.01671 |
| SSPN       | -0.01671 |
| CSTF2      | -0.01672 |
| SPHK2      | -0.01673 |



|            |          |
|------------|----------|
| RNF103     | -0.01674 |
| LINC00963  | -0.01676 |
| PRKRA      | -0.01678 |
| SRSF3      | -0.01679 |
| TRIM32     | -0.0168  |
| WDR82      | -0.01683 |
| FAM104A    | -0.01686 |
| PEX11B     | -0.01686 |
| AC145343.1 | -0.01687 |
| MCU        | -0.01692 |
| DLG1       | -0.01693 |
| MAMDC4     | -0.01694 |
| EZH2       | -0.01694 |
| ETAA1      | -0.01699 |
| LINC00654  | -0.01703 |
| DLG3       | -0.01703 |
| PSEN1      | -0.01705 |
| SNX18      | -0.01715 |
| RNF14      | -0.01716 |
| SH3BGRL3   | -0.01718 |
| TMEM183B   | -0.0172  |
| AK6        | -0.01723 |
| BRI3BP     | -0.01731 |
| PDCL3      | -0.01733 |
| CNOT9      | -0.01733 |
| TMEM187    | -0.01734 |
| AC107952.2 | -0.01735 |
| CMTM6      | -0.01735 |
| RRAGA      | -0.01739 |
| MOB1B      | -0.01739 |
| TMA7       | -0.01748 |
| RPS27AP5   | -0.01751 |
| AKAP10     | -0.01753 |
| NDUFB5     | -0.01753 |
| LYSMD4     | -0.01753 |
| SEC62      | -0.01756 |
| PSME3IP1   | -0.01763 |
| ITGB8      | -0.01763 |
| TAB3       | -0.01768 |
| TADA1      | -0.01768 |
| MRPL35     | -0.01772 |
| KDM4B      | -0.01772 |
| ATP9A      | -0.01772 |
| RNF181     | -0.01775 |
| SLC25A16   | -0.01778 |
| TENM4      | -0.0178  |
| LUC7L2     | -0.0178  |
| NUCB1      | -0.01783 |
| RAD51AP1   | -0.01786 |

|            |          |
|------------|----------|
| RNU6-722P  | -0.01787 |
| AC093162.1 | -0.01787 |
| GPATCH11   | -0.01788 |
| STXBP3     | -0.0179  |
| KIAA1671   | -0.01791 |
| IL13RA2    | -0.01798 |
| BNIP1      | -0.01804 |
| DIXDC1     | -0.01809 |
| AL512598.1 | -0.01812 |
| ABRAXAS1   | -0.01813 |
| SIN3B      | -0.01816 |
| LDAH       | -0.01817 |
| WBP1       | -0.01817 |
| HAGH       | -0.01819 |
| ZC3H4      | -0.0182  |
| HMGN2P17   | -0.01821 |
| RNF20      | -0.01821 |
| STXBP6     | -0.01825 |
| HERC2      | -0.01825 |
| HOOK2      | -0.01826 |
| NOMO2      | -0.01828 |
| TPR        | -0.01829 |
| PARP6      | -0.01829 |
| FCF1P2     | -0.0183  |
| NFE2L3     | -0.0183  |
| GATA6-AS1  | -0.0183  |
| RPS27L     | -0.01832 |
| BTBD10     | -0.01832 |
| PPP1R18    | -0.01833 |
| MLH1       | -0.01836 |
| AL513477.1 | -0.01836 |
| ACAP3      | -0.0184  |
| RPS11      | -0.0184  |
| HDAC8      | -0.01841 |
| LSG1       | -0.01842 |
| RETREG1    | -0.01842 |
| INSIG2     | -0.01845 |
| CALML5     | -0.01845 |
| PHF10      | -0.01846 |
| RPL27A     | -0.01847 |
| DZIP1      | -0.01849 |
| THAP5      | -0.01853 |
| CREM       | -0.01859 |
| AL662795.2 | -0.01859 |
| ACAD10     | -0.01862 |
| CCL2       | -0.01867 |
| MED7       | -0.01869 |
| LSM10      | -0.01872 |
| TLK1       | -0.01875 |

|            |          |
|------------|----------|
| KIAA0232   | -0.01882 |
| CLASP1     | -0.01886 |
| C12orf65   | -0.01887 |
| HAUS8      | -0.01888 |
| AKT2       | -0.01888 |
| ZBTB8OS    | -0.01889 |
| SMYD4      | -0.01891 |
| AC025884.1 | -0.01895 |
| CNOT1      | -0.01897 |
| CNTNAP1    | -0.019   |
| NDRG4      | -0.01902 |
| MICOS10    | -0.01904 |
| AC093752.2 | -0.01914 |
| ZNF829     | -0.01914 |
| MCC        | -0.01917 |
| AL136040.1 | -0.01918 |
| DIAPH2     | -0.01918 |
| SLC25A33   | -0.0192  |
| MMAB       | -0.01922 |
| SPC24      | -0.01923 |
| WDR83OS    | -0.01923 |
| GTF2IP4    | -0.01925 |
| PKNOX1     | -0.01929 |
| MED31      | -0.0193  |
| MRPL16     | -0.01931 |
| CHD3       | -0.01932 |
| VPS28      | -0.01935 |
| DHX40      | -0.01936 |
| AP1G1      | -0.01938 |
| HAX1       | -0.01939 |
| UEVLD      | -0.01942 |
| NEK6       | -0.01943 |
| GMDS       | -0.01948 |
| PRKAA1     | -0.01952 |
| RECK       | -0.01953 |
| TCF25      | -0.01956 |
| ZNF174     | -0.01964 |
| THAP7-AS1  | -0.01965 |
| TGFBRAP1   | -0.01968 |
| DYNC1LI1   | -0.01971 |
| SUGP1      | -0.01972 |
| AC027117.1 | -0.01974 |
| MIR4740    | -0.01975 |
| ATP7A      | -0.01976 |
| AFTPH      | -0.01976 |
| KDM6B      | -0.0198  |
| TRA2B      | -0.0198  |
| PRMT2      | -0.01982 |
| KRR1       | -0.01982 |

|            |          |
|------------|----------|
| FOLH1      | -0.01983 |
| DELE1      | -0.01984 |
| TPT1       | -0.01984 |
| STBD1      | -0.01985 |
| SLC11A2    | -0.01985 |
| ZBTB11     | -0.01988 |
| MYO6       | -0.0199  |
| AK2        | -0.01993 |
| PCDHB7     | -0.01995 |
| LINC01106  | -0.01995 |
| RBM4       | -0.01999 |
| PCNA       | -0.01999 |
| WDFY3      | -0.02002 |
| DERL2      | -0.02004 |
| CYC1       | -0.02007 |
| LINC02830  | -0.02013 |
| AC092953.2 | -0.02016 |
| UBA6-AS1   | -0.0202  |
| GORAB      | -0.02021 |
| TSPY26P    | -0.02022 |
| ZBTB17     | -0.02026 |
| SKAP2      | -0.02028 |
| ZNF260     | -0.02028 |
| AGPAT3     | -0.02029 |
| LAMTOR3    | -0.0203  |
| SORBS2     | -0.0203  |
| RPS13      | -0.02033 |
| DBF4       | -0.02034 |
| AC012313.2 | -0.02034 |
| DNAJC4     | -0.02035 |
| SNX25      | -0.02037 |
| NAA80      | -0.02038 |
| STK32C     | -0.02038 |
| AC136632.2 | -0.02042 |
| ATXN7L2    | -0.02042 |
| ZBTB38     | -0.02043 |
| EIF3G      | -0.02043 |
| NPY1R      | -0.02044 |
| TRMT5      | -0.02047 |
| PDCL       | -0.02054 |
| MZT1       | -0.02054 |
| AUH        | -0.02056 |
| HSDL2      | -0.02056 |
| UBE2D3     | -0.02058 |
| TMEM65     | -0.02058 |
| FANCG      | -0.0206  |
| SCPEP1     | -0.0206  |
| SUSD1      | -0.02064 |
| TNFSF13    | -0.02065 |

|            |          |
|------------|----------|
| GPR180     | -0.02065 |
| CRIP1      | -0.02066 |
| DAD1       | -0.02068 |
| AC008915.2 | -0.0207  |
| SRSF8      | -0.02072 |
| AC110749.1 | -0.02078 |
| ALAD       | -0.02078 |
| KMT5B      | -0.02085 |
| BRD3OS     | -0.0209  |
| ERG28      | -0.02091 |
| ELP1       | -0.02092 |
| NUP42      | -0.02096 |
| MIR4645    | -0.02097 |
| TUSC1      | -0.02097 |
| RPS19      | -0.021   |
| TRIM56     | -0.02102 |
| ARHGEF7    | -0.02104 |
| ALG6       | -0.02105 |
| RAB17      | -0.02106 |
| FARSA      | -0.02109 |
| EXOSC1     | -0.0211  |
| ZSWIM6     | -0.02113 |
| WAPL       | -0.02118 |
| FAHD2CP    | -0.02123 |
| KDM3B      | -0.02126 |
| KIF13B     | -0.02126 |
| PLEKHH1    | -0.02129 |
| ROMO1      | -0.02133 |
| PLA2G4A    | -0.02135 |
| ZCCHC8     | -0.02137 |
| RAVER2     | -0.02139 |
| DOLK       | -0.0214  |
| RNH1       | -0.02147 |
| TCTA       | -0.02151 |
| COX5B      | -0.02152 |
| AKIP1      | -0.02154 |
| HBEGF      | -0.02154 |
| PRR7       | -0.02156 |
| TARDBP     | -0.02158 |
| KBTBD7     | -0.0216  |
| PITPNM2    | -0.02161 |
| FTH1P4     | -0.02163 |
| TMEM242    | -0.02166 |
| TXNDC9     | -0.02166 |
| LARP7      | -0.02168 |
| ELOC       | -0.02168 |
| HDGFL2     | -0.0217  |
| SMARCE1    | -0.02175 |
| RPP38      | -0.02175 |

|            |          |
|------------|----------|
| NUP93      | -0.02179 |
| TUBBP5     | -0.02181 |
| UCK1       | -0.02182 |
| ANKFY1     | -0.02182 |
| ANKRD37    | -0.02187 |
| FLT1       | -0.02188 |
| PIH1D1     | -0.02191 |
| ATXN2L     | -0.02191 |
| AC087623.1 | -0.02192 |
| MLXIP      | -0.02192 |
| MIIP       | -0.02195 |
| ARMC8      | -0.02196 |
| R3HDM4     | -0.02197 |
| SPIRE2     | -0.02199 |
| NCOA6      | -0.02199 |
| PCNT       | -0.02205 |
| WDR6       | -0.02206 |
| EDC4       | -0.02207 |
| IL13RA1    | -0.02207 |
| PSMD6      | -0.02207 |
| MANEAL     | -0.02211 |
| MT-TF      | -0.02218 |
| CTSE       | -0.0222  |
| DCUN1D3    | -0.0222  |
| ENDOD1     | -0.02222 |
| GET1       | -0.02224 |
| TMEM143    | -0.02225 |
| ELK1       | -0.02227 |
| OSBPL2     | -0.02228 |
| FAM161B    | -0.02233 |
| UBE2A      | -0.02233 |
| GPALPP1    | -0.02235 |
| IBTK       | -0.02235 |
| LINC00888  | -0.02236 |
| USP7       | -0.02238 |
| AC046185.2 | -0.0224  |
| PRDM8      | -0.02242 |
| TTC30A     | -0.02243 |
| CSTF1      | -0.02243 |
| RAB28      | -0.02246 |
| NKAP       | -0.02246 |
| RRN3       | -0.02247 |
| SIL1       | -0.02249 |
| FBXL14     | -0.02251 |
| ACVR2B-AS1 | -0.02251 |
| ABHD16A    | -0.02255 |
| RPL30      | -0.02257 |
| RPS3       | -0.02257 |
| ZNF420     | -0.02259 |

|            |          |
|------------|----------|
| RLF        | -0.02264 |
| PNMA1      | -0.02266 |
| UHRF1BP1   | -0.02268 |
| AC009303.4 | -0.02274 |
| POMT2      | -0.02276 |
| SNW1       | -0.02278 |
| PPP5C      | -0.02279 |
| PI4K2A     | -0.0228  |
| ACAT1      | -0.02282 |
| ERP44      | -0.02288 |
| ARL6IP1    | -0.02291 |
| MKKS       | -0.02292 |
| ADD3       | -0.02292 |
| TMEM37     | -0.02292 |
| USP33      | -0.02293 |
| DGKQ       | -0.02295 |
| PDE4DIP    | -0.02295 |
| MINK1      | -0.02296 |
| COPS4      | -0.02301 |
| ZBTB46     | -0.02302 |
| ADNP2      | -0.02303 |
| INCA1      | -0.02307 |
| RPL9       | -0.02307 |
| AC103810.3 | -0.02309 |
| RNF32      | -0.02314 |
| ATP6V1D    | -0.02319 |
| SRSF1      | -0.0232  |
| AC008014.1 | -0.02322 |
| ZNF207     | -0.02322 |
| MIR4292    | -0.02322 |
| SPOP       | -0.02324 |
| TBCD       | -0.02324 |
| GBAP1      | -0.02324 |
| TRADD      | -0.02325 |
| PEX5       | -0.02325 |
| ARPC4      | -0.02329 |
| XRN2       | -0.02332 |
| DENND5A    | -0.02333 |
| ZNF674     | -0.02334 |
| VEGFB      | -0.02338 |
| Z99572.1   | -0.02339 |
| PEX16      | -0.02344 |
| EMC3-AS1   | -0.02345 |
| DUSP16     | -0.02346 |
| KLF4       | -0.02348 |
| BX284668.4 | -0.02348 |
| ANKRD13B   | -0.02349 |
| VIPAS39    | -0.0235  |
| KIF21A     | -0.02351 |

|            |          |
|------------|----------|
| AP001372.2 | -0.02354 |
| C16orf70   | -0.02355 |
| MTMR4      | -0.02355 |
| KIFAP3     | -0.02356 |
| RAF1       | -0.02359 |
| MTERF1     | -0.02361 |
| NUS1       | -0.02362 |
| RPL18A     | -0.02366 |
| TMEM18     | -0.02366 |
| SPOPL      | -0.02368 |
| SNRNP35    | -0.02373 |
| DHRS12     | -0.02374 |
| WDR48      | -0.02376 |
| SPATA24    | -0.02378 |
| TRNT1      | -0.02379 |
| FRS3       | -0.02379 |
| RNF141     | -0.02379 |
| CD58       | -0.02382 |
| RYR1       | -0.02385 |
| PLK3       | -0.02386 |
| GTPBP3     | -0.02388 |
| MAPKAPK3   | -0.0239  |
| AL731571.1 | -0.02391 |
| PBRM1      | -0.02396 |
| MVP        | -0.02401 |
| APEX1      | -0.02405 |
| LRRC32     | -0.02405 |
| CAMTA1     | -0.02405 |
| CXCR2      | -0.02407 |
| AC008946.1 | -0.02411 |
| COX7A2     | -0.02414 |
| NTN4       | -0.02414 |
| WDR61      | -0.02415 |
| GTF2H2C    | -0.02415 |
| ZNF788P    | -0.02417 |
| CNN3-DT    | -0.02419 |
| ZNF331     | -0.02421 |
| PAM16      | -0.02421 |
| TIMM44     | -0.02422 |
| COP1       | -0.02427 |
| MIR4258    | -0.02429 |
| AC010326.4 | -0.0243  |
| ARRDC1     | -0.02432 |
| KBTBD4     | -0.02434 |
| MIR3936    | -0.02439 |
| UTP18      | -0.02445 |
| PACS2      | -0.02447 |
| TCF12      | -0.02451 |
| CCNG1      | -0.02453 |



|            |          |
|------------|----------|
| UBA2       | -0.02453 |
| TRAM1      | -0.02453 |
| ZNF774     | -0.02457 |
| HIRIP3     | -0.02458 |
| PSMA1      | -0.02458 |
| SIK3       | -0.0246  |
| RSU1       | -0.02462 |
| ZBTB39     | -0.02465 |
| CHD1L      | -0.02466 |
| PRR15      | -0.02472 |
| PRELP      | -0.02473 |
| TMUB2      | -0.02474 |
| PKP4       | -0.02476 |
| LPP-AS2    | -0.02477 |
| TGIF2      | -0.02478 |
| ZNF793     | -0.02479 |
| AC233723.2 | -0.0248  |
| CDC26      | -0.02482 |
| NAGLU      | -0.02484 |
| CNNM2      | -0.02484 |
| DIS3L      | -0.02486 |
| GSTT2B     | -0.02489 |
| ZNF354A    | -0.02491 |
| TOR1A      | -0.02492 |
| RUFY2      | -0.02492 |
| CCDC82     | -0.02494 |
| RBMX2      | -0.02495 |
| VRK2       | -0.02496 |
| PXN-AS1    | -0.02497 |
| SGSH       | -0.02497 |
| STX1A      | -0.02497 |
| SUPT16H    | -0.02499 |
| SPIN4      | -0.02499 |
| ATP1B3     | -0.02502 |
| CPSF7      | -0.02504 |
| GSKIP      | -0.02506 |
| SNN        | -0.02507 |
| MTF1       | -0.0251  |
| PIN4       | -0.02511 |
| AC124016.1 | -0.02515 |
| VCP        | -0.02515 |
| AL359962.1 | -0.02515 |
| TAF9B      | -0.02519 |
| PPIL2      | -0.02521 |
| CBFB       | -0.02535 |
| FAM118B    | -0.0254  |
| RNASE2     | -0.02542 |
| CDK8       | -0.02543 |
| SAYSD1     | -0.02544 |

|             |          |
|-------------|----------|
| KCNN4       | -0.02547 |
| DDX19A      | -0.0255  |
| RBBP7       | -0.0255  |
| SIAH1       | -0.0255  |
| CRYBG1      | -0.0255  |
| LAMTOR5     | -0.02554 |
| ZNF143      | -0.02554 |
| KLK10       | -0.02559 |
| MSRB2       | -0.02561 |
| MSTO1       | -0.02563 |
| BOP1        | -0.02564 |
| GFM2        | -0.02569 |
| CAPN12      | -0.02569 |
| INTS6       | -0.02573 |
| APTX        | -0.02573 |
| CTPS2       | -0.02574 |
| ZSCAN16-AS1 | -0.02577 |
| DYNLRB1     | -0.02578 |
| EXD3        | -0.0258  |
| FHOD1       | -0.02583 |
| PITX1       | -0.02583 |
| MRPL57      | -0.02584 |
| TSFM        | -0.02585 |
| GRB7        | -0.02591 |
| KBTBD2      | -0.02594 |
| ACADSB      | -0.02595 |
| MBD3        | -0.02596 |
| GUCA1B      | -0.02599 |
| TWF2        | -0.02599 |
| CCDC57      | -0.02603 |
| KSR1        | -0.02604 |
| UBA6        | -0.02606 |
| RPS26       | -0.02608 |
| AL390719.2  | -0.02609 |
| CEP72       | -0.0261  |
| SEPTIN11    | -0.02612 |
| ZFAS1       | -0.02613 |
| Z98257.1    | -0.02615 |
| RBMXL1      | -0.02616 |
| CHUK        | -0.02617 |
| ZNF718      | -0.02618 |
| MFSD14B     | -0.02619 |
| RFFL        | -0.02624 |
| HMG5        | -0.02624 |
| AL627309.7  | -0.02626 |
| B3GNT2      | -0.02627 |
| ZNF334      | -0.02627 |
| BRF1        | -0.02634 |
| ZYG11B      | -0.02634 |

|            |          |
|------------|----------|
| COMMD9     | -0.02638 |
| GIGYF2     | -0.02639 |
| AP000580.1 | -0.02642 |
| SOD3       | -0.02648 |
| WDR81      | -0.0265  |
| DBF4B      | -0.02652 |
| TSSK6      | -0.02654 |
| C17orf75   | -0.02656 |
| SPTBN5     | -0.02656 |
| ING5       | -0.02658 |
| AL021807.1 | -0.02661 |
| ICE2       | -0.02664 |
| CCNQ       | -0.02666 |
| HNRNPD     | -0.02673 |
| ATE1       | -0.02675 |
| CWF19L1    | -0.02676 |
| B3GAT3     | -0.02678 |
| EDEM2      | -0.0268  |
| ZFP1       | -0.02682 |
| AC016876.1 | -0.02683 |
| MYNN       | -0.02685 |
| MRPL48     | -0.02687 |
| ACBD6      | -0.02695 |
| STARD3     | -0.02696 |
| CADM4      | -0.02697 |
| AP001033.1 | -0.02699 |
| ALMS1-IT1  | -0.02702 |
| KDM5C      | -0.02703 |
| YTHDF3     | -0.02703 |
| SMARCAD1   | -0.02703 |
| ZNF239     | -0.02704 |
| HP1BP3     | -0.02708 |
| CREB3L2    | -0.02711 |
| KIF26A     | -0.02715 |
| ZNF823     | -0.02718 |
| PAQR3      | -0.02718 |
| MPC2       | -0.02719 |
| PIGC       | -0.02726 |
| CCDC106    | -0.02728 |
| XK         | -0.02729 |
| FTO        | -0.0273  |
| ZNF274     | -0.02737 |
| NCOA3      | -0.0274  |
| PNP        | -0.02742 |
| C11orf58   | -0.02753 |
| NBPF3      | -0.02753 |
| LYZ        | -0.02757 |
| IDE        | -0.02769 |
| ASB3       | -0.02772 |

|            |          |
|------------|----------|
| SUCLG1     | -0.02773 |
| CLINT1     | -0.02781 |
| PDE1A      | -0.02784 |
| PFDN4      | -0.02785 |
| PRPS1      | -0.0279  |
| COG7       | -0.02797 |
| PTDSS2     | -0.02797 |
| MEF2A      | -0.02806 |
| RDH14      | -0.02808 |
| TIAM1      | -0.02812 |
| SNX14      | -0.02812 |
| DHRX       | -0.02815 |
| PDIA5      | -0.02816 |
| PKN2       | -0.02816 |
| MTCYBP18   | -0.02817 |
| C8orf33    | -0.02819 |
| CDC16      | -0.02822 |
| PSTK       | -0.02824 |
| GATB       | -0.02826 |
| ZFP91      | -0.02829 |
| RAB12      | -0.0283  |
| DNAJA2     | -0.02832 |
| RNF170     | -0.02833 |
| LRRC28     | -0.02844 |
| EEF1AKMT3  | -0.02853 |
| KDM3A      | -0.02856 |
| EMID1      | -0.02858 |
| PSME4      | -0.02859 |
| FABP4      | -0.02859 |
| ZNF112     | -0.0286  |
| SFXN4      | -0.02861 |
| AC002116.2 | -0.02863 |
| TCEA1P2    | -0.02865 |
| LINC00910  | -0.02866 |
| SNRPB2     | -0.02871 |
| DHPS       | -0.02871 |
| CHMP5      | -0.02872 |
| C1orf74    | -0.02872 |
| MED24      | -0.02875 |
| TTC39A     | -0.02876 |
| CLN5       | -0.02877 |
| DDX51      | -0.02878 |
| RPLP2      | -0.02881 |
| ARL16      | -0.02882 |
| GDPD5      | -0.02882 |
| AL031777.1 | -0.02882 |
| POLRMT     | -0.02882 |
| TRIM52-AS1 | -0.02884 |
| ASNSD1     | -0.02886 |

|            |          |
|------------|----------|
| TRA2A      | -0.02886 |
| PIGU       | -0.02887 |
| KIDINS220  | -0.02892 |
| IST1       | -0.02898 |
| SLU7       | -0.02899 |
| FANCF      | -0.02899 |
| CEP152     | -0.029   |
| TCTN2      | -0.02905 |
| CLDN2      | -0.02915 |
| FAM102A    | -0.02918 |
| H1-10      | -0.02919 |
| ARPC3      | -0.02919 |
| C1orf115   | -0.0292  |
| CYHR1      | -0.02924 |
| BHLHB9     | -0.02925 |
| PDCD2      | -0.02925 |
| CUL5       | -0.02926 |
| SNHG17     | -0.02931 |
| PUF60      | -0.02931 |
| NUBP1      | -0.02931 |
| VBP1       | -0.02934 |
| ZNF75A     | -0.02943 |
| FAM160A2   | -0.02946 |
| TRAPPC2B   | -0.02947 |
| GARRE1     | -0.02947 |
| ATP5ME     | -0.02948 |
| RNASEH2C   | -0.02951 |
| NSD3       | -0.02951 |
| ABALON     | -0.02953 |
| WNK1       | -0.02953 |
| NSUN3      | -0.02955 |
| COPRS      | -0.02956 |
| DCLRE1A    | -0.02959 |
| TAF10      | -0.02964 |
| MCRIP2     | -0.02966 |
| ODF2       | -0.02968 |
| HSPB11     | -0.02969 |
| ING4       | -0.02975 |
| LPAR2      | -0.02976 |
| COX4I2     | -0.02976 |
| CDKN2A     | -0.02987 |
| COX18      | -0.02988 |
| MAN1B1-DT  | -0.02993 |
| AKTIP      | -0.02994 |
| FBXL4      | -0.02995 |
| AP001065.3 | -0.02995 |
| ADAMTSL3   | -0.02995 |
| ALKBH3     | -0.02997 |
| ZKSCAN8    | -0.02997 |

|            |          |
|------------|----------|
| RPS7       | -0.02997 |
| UBB        | -0.02998 |
| DSG3       | -0.03002 |
| CHRA1      | -0.03006 |
| STK3       | -0.03011 |
| AL078581.2 | -0.03011 |
| NEBL       | -0.03012 |
| GGNBP2     | -0.03014 |
| IVNS1ABP   | -0.03018 |
| LINC01703  | -0.0302  |
| RNASET2    | -0.03026 |
| SARS1      | -0.03027 |
| PPP6R1     | -0.03028 |
| NUF2       | -0.03035 |
| VAX2       | -0.03046 |
| LARP4B     | -0.03047 |
| LINC02159  | -0.03051 |
| ERBIN      | -0.03052 |
| RCAN1      | -0.03055 |
| AC245297.3 | -0.03056 |
| RNF217     | -0.03058 |
| PDP2       | -0.03059 |
| MAP2K2     | -0.03059 |
| SNX2       | -0.03063 |
| RASSF10    | -0.03069 |
| EIF1B      | -0.03071 |
| ZNF202     | -0.03072 |
| C11orf49   | -0.03073 |
| TCF7L1     | -0.03078 |
| AC073842.2 | -0.03079 |
| GSN        | -0.03081 |
| RAB3GAP2   | -0.03083 |
| EPB41L5    | -0.03088 |
| CLPP       | -0.03089 |
| ABCD1      | -0.03092 |
| ZNF669     | -0.03092 |
| ZXDC       | -0.03094 |
| RABGGTA    | -0.03095 |
| UGGT2      | -0.03101 |
| SOS1       | -0.03102 |
| SELENOW    | -0.03102 |
| REPS1      | -0.03103 |
| DOK4       | -0.03105 |
| APAF1      | -0.03106 |
| RBX1       | -0.03108 |
| FCER1A     | -0.03109 |
| FLOT2      | -0.03117 |
| AL121949.3 | -0.0312  |
| CEBPG      | -0.03122 |

|            |          |
|------------|----------|
| CHAF1A     | -0.03122 |
| C1orf131   | -0.03128 |
| TMEM241    | -0.03131 |
| OTUD4      | -0.03133 |
| AC073957.3 | -0.03138 |
| BCDIN3D    | -0.03138 |
| FASTKD5    | -0.03139 |
| C3orf52    | -0.03139 |
| IER2       | -0.0314  |
| ATP6AP2    | -0.0314  |
| PSPC1      | -0.03144 |
| ZNF551     | -0.03145 |
| WDR77      | -0.03145 |
| RAPGEF2    | -0.03148 |
| MIA3       | -0.03148 |
| FAM111B    | -0.0315  |
| MLPH       | -0.0315  |
| FARP1      | -0.03157 |
| SRP14P2    | -0.03159 |
| OSBPL3     | -0.03164 |
| SMAD6      | -0.03164 |
| VPS9D1     | -0.03165 |
| CCDC121    | -0.0317  |
| FOXO6-AS1  | -0.03171 |
| ERI2       | -0.03172 |
| BNIP1      | -0.03173 |
| IK         | -0.03178 |
| OR2A7      | -0.03178 |
| RIPK2      | -0.03186 |
| CARS2      | -0.03188 |
| AC092794.1 | -0.03188 |
| TSEN2      | -0.03191 |
| NCOA4      | -0.03205 |
| RAD54L2    | -0.03215 |
| AP005018.2 | -0.03217 |
| BSCL2      | -0.03231 |
| R3HDM2     | -0.03234 |
| ARL4A      | -0.03235 |
| MRRF       | -0.03235 |
| MKS1       | -0.03237 |
| SLC35E2B   | -0.03238 |
| WFDC2      | -0.03238 |
| FOXD2      | -0.0324  |
| DCAF8      | -0.03241 |
| HSD17B6    | -0.03245 |
| PIAS4      | -0.03245 |
| ZFP36L1    | -0.03248 |
| ZNF84      | -0.03253 |
| FPGT       | -0.03254 |

|            |          |
|------------|----------|
| AC009118.3 | -0.03255 |
| TUT7       | -0.03256 |
| DUS3L      | -0.03258 |
| DDX46      | -0.0326  |
| C5orf63    | -0.03261 |
| ALG10B     | -0.03269 |
| CDNF       | -0.0327  |
| TIAL1      | -0.03271 |
| ORC4       | -0.03272 |
| TMEM109    | -0.03274 |
| AF001548.2 | -0.03275 |
| FAM86FP    | -0.03277 |
| UFL1       | -0.03277 |
| SPIN2B     | -0.03279 |
| RAD17      | -0.03281 |
| SLC27A1    | -0.03282 |
| SHMT2      | -0.03286 |
| DNAJC16    | -0.0329  |
| HSD11B1L   | -0.03292 |
| ZNF830     | -0.03294 |
| MON1B      | -0.03294 |
| SMYD2      | -0.03295 |
| TSHZ1      | -0.033   |
| GDPD1      | -0.03303 |
| EHBP1L1    | -0.03306 |
| TCEAL8     | -0.03309 |
| SUPT20H    | -0.03311 |
| PEPD       | -0.03313 |
| DNAJA1     | -0.03317 |
| NBPF1      | -0.03319 |
| UGCG       | -0.03321 |
| C8orf31    | -0.03322 |
| AC016888.1 | -0.03325 |
| SAR1B      | -0.03326 |
| CLPB       | -0.0333  |
| CEP104     | -0.0333  |
| PPP1CC     | -0.0333  |
| ACOT7      | -0.03334 |
| RTL8A      | -0.03337 |
| TEF        | -0.0334  |
| NBR2       | -0.03341 |
| TOMM5      | -0.03347 |
| COG1       | -0.03348 |
| CREB3L1    | -0.03348 |
| TENT4A     | -0.03349 |
| ROBO4      | -0.03353 |
| ZNF263     | -0.03355 |
| AMIGO1     | -0.03359 |
| ZNF528     | -0.03359 |



|            |          |
|------------|----------|
| AC115618.3 | -0.0336  |
| ARHGAP12   | -0.03361 |
| ENOX2      | -0.03363 |
| CFB        | -0.03364 |
| RRP8       | -0.03365 |
| CD2BP2-DT  | -0.03368 |
| PLPP7      | -0.03369 |
| USE1       | -0.03383 |
| SUGT1P1    | -0.03383 |
| HSD17B1P1  | -0.03385 |
| ATG4C      | -0.03385 |
| LAMP2      | -0.03388 |
| NNMT       | -0.03389 |
| NAP1L4     | -0.03391 |
| CRNKL1     | -0.03392 |
| LSM14A     | -0.03392 |
| PPP6C      | -0.03395 |
| KLHL17     | -0.03396 |
| PBDC1      | -0.03397 |
| TERF1      | -0.0341  |
| PPP2R2D    | -0.0341  |
| AL391422.1 | -0.03421 |
| LTK        | -0.03422 |
| TMEM126B   | -0.03424 |
| PLXNB1     | -0.03427 |
| DNM2       | -0.03429 |
| MIOS       | -0.03429 |
| ANKRD39    | -0.0343  |
| RPS6KB2    | -0.03431 |
| GOSR2      | -0.03435 |
| EXOSC7     | -0.03435 |
| NRP1       | -0.03442 |
| MAK16      | -0.03454 |
| RPL13A     | -0.03458 |
| RPLP1      | -0.03458 |
| AC135721.1 | -0.03459 |
| MAPK9      | -0.0346  |
| POP1       | -0.0346  |
| PRELID2P1  | -0.03462 |
| MPPE1      | -0.03464 |
| PNRC2      | -0.03467 |
| NOP9       | -0.03469 |
| STRIP1     | -0.03469 |
| YWHAH      | -0.03469 |
| TTC37      | -0.03471 |
| AC142472.1 | -0.03475 |
| E2F1       | -0.03475 |
| PTK2       | -0.03476 |
| SPATS2     | -0.03477 |

|            |          |
|------------|----------|
| GREM2      | -0.03479 |
| CLIC5      | -0.03483 |
| GPATCH2    | -0.03486 |
| CCDC25     | -0.03486 |
| PRXL2C     | -0.03489 |
| FBXO44     | -0.0349  |
| ACYP2      | -0.03491 |
| PGBD1      | -0.03493 |
| THADA      | -0.03494 |
| AP000894.4 | -0.03498 |
| TXNL4B     | -0.03498 |
| NCOA7      | -0.03501 |
| ARPC5      | -0.03505 |
| TBC1D20    | -0.03506 |
| SFTA3      | -0.03506 |
| CASC3      | -0.0351  |
| NOVA2      | -0.0351  |
| AL133517.1 | -0.03511 |
| CAB39L     | -0.03515 |
| PIK3R3     | -0.03521 |
| IMPA1      | -0.03523 |
| HEATR6     | -0.03532 |
| PLPP5      | -0.03533 |
| SRPRB      | -0.03537 |
| PPP3CB     | -0.03537 |
| HSD17B10   | -0.03538 |
| ZNF644     | -0.0354  |
| NOL9       | -0.03542 |
| RPAP2      | -0.03544 |
| HACD3      | -0.03546 |
| AC005041.3 | -0.03548 |
| COQ10B     | -0.03548 |
| NAP1L2     | -0.03552 |
| RCHY1      | -0.03553 |
| ATAD3B     | -0.03554 |
| ACTR8      | -0.03558 |
| PUM3       | -0.03558 |
| MIR659     | -0.0356  |
| TRAPPC11   | -0.0356  |
| HNRNPLL    | -0.03562 |
| ARAP3      | -0.03563 |
| AL139384.1 | -0.03564 |
| ATP6V1A    | -0.03565 |
| C9orf78    | -0.03567 |
| GPATCH8    | -0.0357  |
| CFAP410    | -0.03572 |
| TANK       | -0.03573 |
| MTFR1      | -0.03575 |
| FANCL      | -0.03575 |

|            |          |
|------------|----------|
| TMPPE      | -0.03576 |
| RABAC1     | -0.03576 |
| MACC1      | -0.03577 |
| MIR181A2HG | -0.03578 |
| HINT1      | -0.03581 |
| SSX2IP     | -0.03582 |
| TRAPPC12   | -0.03582 |
| LTV1       | -0.03586 |
| KRIT1      | -0.03592 |
| NOC3L      | -0.03594 |
| PLAGL2     | -0.03594 |
| CNIH1      | -0.03598 |
| LINC01003  | -0.03601 |
| EFCAB11    | -0.03601 |
| TMBIM4     | -0.03601 |
| ACSM3      | -0.03602 |
| AC027644.3 | -0.03608 |
| FAM162B    | -0.03609 |
| LIMD1      | -0.0361  |
| DDX6       | -0.03618 |
| TRAF2      | -0.03619 |
| WDR33      | -0.0362  |
| NEK4       | -0.03622 |
| SLTM       | -0.03627 |
| AC007663.1 | -0.0363  |
| MIB2       | -0.03633 |
| RBM41      | -0.03634 |
| LAGE3      | -0.03635 |
| STAM2      | -0.03637 |
| TCERG1     | -0.03638 |
| CDK4       | -0.0364  |
| DYNLT3     | -0.03641 |
| TMEM134    | -0.03641 |
| EPPK1      | -0.03643 |
| RPS19BP1   | -0.03644 |
| GPR160     | -0.0365  |
| FAM120B    | -0.03652 |
| PKN1       | -0.03653 |
| RUNX2      | -0.03654 |
| LYPD6B     | -0.03655 |
| TASOR2     | -0.03656 |
| PPHLN1     | -0.03657 |
| C12orf45   | -0.03658 |
| RBM19      | -0.0366  |
| GGT6       | -0.0367  |
| ZNF888     | -0.03671 |
| GLE1       | -0.03671 |
| MAPRE3     | -0.03675 |
| LURAP1L    | -0.03675 |

|            |          |
|------------|----------|
| LYPLA1     | -0.03682 |
| PNMA2      | -0.03682 |
| ZNF845     | -0.03683 |
| SMDT1      | -0.03685 |
| ZNF283     | -0.03685 |
| SPG7       | -0.03692 |
| UTP23      | -0.03692 |
| TRIM33     | -0.03693 |
| DDX28      | -0.03696 |
| SCARB2     | -0.03701 |
| NR1D2      | -0.03703 |
| COL6A3     | -0.03706 |
| ELAPOR2    | -0.03707 |
| MRPS18C    | -0.03709 |
| CPOX       | -0.03715 |
| C3orf14    | -0.03715 |
| SUOX       | -0.03716 |
| PLEKHM1    | -0.03719 |
| AC025171.1 | -0.03724 |
| CKS2       | -0.03727 |
| MIEF1      | -0.0373  |
| TMEM126A   | -0.03731 |
| CIAO1      | -0.03733 |
| ZFPM1      | -0.03733 |
| BPTF       | -0.03738 |
| ZNF655     | -0.0374  |
| TRIM26     | -0.03741 |
| BLVRA      | -0.03741 |
| NDUFB7     | -0.03743 |
| PNKP       | -0.03749 |
| USP4       | -0.03751 |
| HSD17B11   | -0.03754 |
| SIRT6      | -0.03755 |
| GALM       | -0.03755 |
| GADD45A    | -0.03757 |
| BRD4       | -0.03762 |
| CEP44      | -0.03765 |
| TLE3       | -0.03771 |
| CISH       | -0.03772 |
| SLC16A7    | -0.03772 |
| ARHGAP44   | -0.03772 |
| NAA20      | -0.03775 |
| MAPK8      | -0.03779 |
| MAGEE1     | -0.03783 |
| SMPD1      | -0.03783 |
| NRAV       | -0.03787 |
| CTXN1      | -0.03791 |
| NF1        | -0.03791 |
| IGKV1D-27  | -0.03792 |

|             |          |
|-------------|----------|
| CCDC107     | -0.03793 |
| ANKRD50     | -0.03797 |
| AC068870.2  | -0.03798 |
| SOCS7       | -0.03799 |
| INO80       | -0.038   |
| QSOX2       | -0.03801 |
| SDHAF2      | -0.03803 |
| PGGT1B      | -0.03807 |
| PHF20       | -0.03808 |
| HUS1        | -0.03809 |
| MC1R        | -0.0381  |
| VRK3        | -0.03811 |
| PRPF4B      | -0.03814 |
| GATA6       | -0.03816 |
| MAN1A2      | -0.03818 |
| SDCBP       | -0.03821 |
| CPLANE1     | -0.03822 |
| PUM2        | -0.03825 |
| USP47       | -0.03827 |
| MTHFD1      | -0.03829 |
| ZNF517      | -0.0383  |
| GPATCH1     | -0.03831 |
| CMTR1       | -0.03833 |
| ZNF585B     | -0.03834 |
| BMP7        | -0.03836 |
| STON1       | -0.03836 |
| BLOC1S2     | -0.03838 |
| EEF1D       | -0.03844 |
| DENND2C     | -0.03845 |
| GLMN        | -0.0385  |
| USP11       | -0.03852 |
| RB1CC1      | -0.03861 |
| SLC30A7     | -0.03862 |
| JAK1        | -0.03865 |
| COQ4        | -0.03867 |
| GABARAPL2   | -0.03869 |
| CISD2       | -0.0387  |
| RNASEH2A    | -0.0387  |
| RASGRP3-AS1 | -0.03882 |
| AC113191.1  | -0.03888 |
| MPHOSPH6    | -0.03889 |
| AL138756.1  | -0.03899 |
| COQ2        | -0.039   |
| PABPC1P3    | -0.03903 |
| TMEM125     | -0.03906 |
| U2AF2       | -0.03906 |
| TSTD2       | -0.03912 |
| ESRP1       | -0.03913 |
| VTI1A       | -0.03915 |

|            |          |
|------------|----------|
| ZBTB44     | -0.03916 |
| SIRT4      | -0.03917 |
| PFDN5      | -0.03918 |
| PLEKHJ1    | -0.03922 |
| TIGAR      | -0.03923 |
| EPHA4      | -0.03933 |
| LMO3       | -0.03938 |
| PQBP1      | -0.03939 |
| AACS       | -0.03939 |
| VPS35L     | -0.03944 |
| HEATR5B    | -0.03944 |
| TTI2       | -0.03946 |
| MAPKAPK5   | -0.03948 |
| NDUFB8     | -0.0395  |
| TMSB4XP8   | -0.03954 |
| SRRM1      | -0.03955 |
| MRAS       | -0.03955 |
| RAPH1      | -0.03956 |
| NDUFA7     | -0.03957 |
| ST6GALNAC5 | -0.03958 |
| HSD17B4    | -0.03971 |
| AC069282.1 | -0.03971 |
| RP9        | -0.03973 |
| MIR3186    | -0.03978 |
| GTDC1      | -0.03982 |
| C2CD3      | -0.03983 |
| SNHG6      | -0.03984 |
| SYS1       | -0.03987 |
| ZC3H14     | -0.03987 |
| HMGN4      | -0.03987 |
| MAFF       | -0.03993 |
| AC069547.1 | -0.03997 |
| COLEC12    | -0.03998 |
| TM9SF1     | -0.03999 |
| TLN1       | -0.04003 |
| LIG1       | -0.04003 |
| VPS26C     | -0.04003 |
| PRDM11     | -0.04003 |
| CKMT2-AS1  | -0.04005 |
| C19orf73   | -0.04007 |
| ASB8       | -0.04007 |
| ITGA1      | -0.04011 |
| AC020910.6 | -0.04011 |
| DDX3X      | -0.04011 |
| DLST       | -0.04011 |
| DSN1       | -0.04012 |
| ZNF500     | -0.04016 |
| XPO7       | -0.0402  |
| PSMC1      | -0.04022 |

|            |          |
|------------|----------|
| GPM6B      | -0.04022 |
| POLR3E     | -0.04025 |
| AP5S1      | -0.04026 |
| SETD4      | -0.04028 |
| EFS        | -0.04033 |
| UBXN4      | -0.04035 |
| C11orf98   | -0.04037 |
| VIRMA      | -0.04044 |
| PPP1R12A   | -0.04045 |
| TAF1D      | -0.04051 |
| RPS15A     | -0.04052 |
| SHQ1       | -0.04052 |
| USP28      | -0.04052 |
| MIR3936HG  | -0.04053 |
| RNF157     | -0.04054 |
| AFF3       | -0.04056 |
| STX3       | -0.04058 |
| NAPG       | -0.04059 |
| UPF2       | -0.0406  |
| PDE12      | -0.04061 |
| AC024560.3 | -0.04064 |
| FGFR2      | -0.04067 |
| MTCH2      | -0.04075 |
| AC087501.4 | -0.04075 |
| OSER1-DT   | -0.04076 |
| TMED10P2   | -0.04076 |
| TBP        | -0.0408  |
| COPE       | -0.04083 |
| SLC25A44   | -0.04087 |
| TM7SF2     | -0.04089 |
| MAP1LC3B   | -0.0409  |
| LINC00623  | -0.0409  |
| CT83       | -0.04092 |
| LTN1       | -0.04093 |
| RSL24D1P6  | -0.04093 |
| LINC00672  | -0.04093 |
| UNC119B    | -0.04094 |
| LIN37      | -0.04098 |
| LRRC37BP1  | -0.04103 |
| BARD1      | -0.04113 |
| RPS28      | -0.04115 |
| SMIM20     | -0.04117 |
| GNPDA1     | -0.0412  |
| TMEM258    | -0.04121 |
| ASB13      | -0.04121 |
| AL158166.2 | -0.04123 |
| AC097639.1 | -0.04123 |
| PIGO       | -0.04124 |
| AC068338.2 | -0.04124 |

|            |          |
|------------|----------|
| MNX1-AS1   | -0.04125 |
| METTL15P1  | -0.04128 |
| GPR173     | -0.04129 |
| TM4SF18    | -0.0413  |
| CCDC122    | -0.04131 |
| ZNF2       | -0.04132 |
| RPS21      | -0.04135 |
| TCEAL1     | -0.04136 |
| AC124248.1 | -0.04138 |
| MTARC2     | -0.04138 |
| ZNF696     | -0.04145 |
| AP1M1      | -0.04147 |
| AC004130.2 | -0.04147 |
| TONSL-AS1  | -0.04148 |
| AC132942.1 | -0.04149 |
| SPRTN      | -0.04152 |
| SIRT3      | -0.04152 |
| CHD1       | -0.04159 |
| STX18      | -0.0416  |
| RWDD1      | -0.04162 |
| AL356356.1 | -0.04165 |
| SART3      | -0.04166 |
| NEPRO      | -0.04166 |
| SNRPGP10   | -0.04167 |
| SLC7A2     | -0.04169 |
| FRG1       | -0.04172 |
| SHKBP1     | -0.04177 |
| AC009309.1 | -0.04179 |
| PWWP3A     | -0.0418  |
| KAT7       | -0.04181 |
| BLOC1S6    | -0.04181 |
| PPCDC      | -0.04183 |
| VMA21      | -0.04185 |
| FCGRT      | -0.04185 |
| MED25      | -0.04191 |
| C22orf39   | -0.04192 |
| METTL15    | -0.04192 |
| HACL1      | -0.04193 |
| PPIL3      | -0.04196 |
| PAFAH1B3   | -0.04196 |
| AKAP13     | -0.04198 |
| C6orf99    | -0.04199 |
| REEP2      | -0.04202 |
| CD46       | -0.04203 |
| BICRAL     | -0.04204 |
| ZC3H15     | -0.04207 |
| AC005840.2 | -0.04211 |
| PDIA4      | -0.04214 |
| LRSAM1     | -0.04215 |



|            |          |
|------------|----------|
| AC110285.2 | -0.04223 |
| NISCH      | -0.0423  |
| FBXL12     | -0.04231 |
| ZNF609     | -0.04232 |
| SAFB       | -0.04238 |
| ARID3B     | -0.0424  |
| SGMS1      | -0.04242 |
| PLXND1     | -0.04242 |
| BRSK1      | -0.04243 |
| AC136628.3 | -0.04244 |
| AC092747.4 | -0.04263 |
| HMOX2      | -0.04265 |
| GLDN       | -0.04268 |
| ZNF404     | -0.04268 |
| SNHG7      | -0.04273 |
| ZDBF2      | -0.04275 |
| UTP3       | -0.04276 |
| NCEH1      | -0.0428  |
| FBXO42     | -0.04282 |
| MT-CO2     | -0.04285 |
| TRIB1      | -0.04288 |
| R3HCC1     | -0.04292 |
| GTF2B      | -0.04294 |
| MGC32805   | -0.04296 |
| TUT1       | -0.04298 |
| TARS3      | -0.04298 |
| MVD        | -0.04299 |
| SFSWAP     | -0.04299 |
| APCDD1     | -0.04301 |
| BORCS5     | -0.04301 |
| EXOSC6     | -0.04303 |
| DENND11    | -0.04305 |
| GRID2IP    | -0.04307 |
| C8orf48    | -0.04309 |
| ZSCAN26    | -0.0431  |
| CYB5D1     | -0.0431  |
| SRRM2      | -0.04311 |
| MFSD9      | -0.04312 |
| MFSD14A    | -0.04313 |
| AC005682.1 | -0.04314 |
| ASF1B      | -0.04315 |
| LTBP4      | -0.04318 |
| ORAI1      | -0.04319 |
| FECH       | -0.04319 |
| ARFIP1     | -0.04321 |
| MYLIP      | -0.04321 |
| PPP4R3B    | -0.04322 |
| GNAI2      | -0.04325 |
| ECHDC1     | -0.04327 |

|            |          |
|------------|----------|
| STRIP2     | -0.04327 |
| ECH1       | -0.04328 |
| AIM2       | -0.04328 |
| ZNF875     | -0.04329 |
| ZNF35      | -0.04332 |
| STIM1      | -0.04333 |
| NBPF9      | -0.04336 |
| LZTS3      | -0.04348 |
| NOL8       | -0.0435  |
| BCAS3      | -0.04352 |
| MAP4K3-DT  | -0.04355 |
| LINC01144  | -0.04356 |
| TRAPPC2L   | -0.0436  |
| ZNF232-AS1 | -0.04361 |
| TANC1      | -0.04362 |
| NEURL4     | -0.04367 |
| EIF4ENIF1  | -0.04367 |
| PSMD10     | -0.04369 |
| IGHMBP2    | -0.04369 |
| KYAT3      | -0.0437  |
| CCAR1      | -0.04374 |
| USP6NL     | -0.04379 |
| PIGM       | -0.04383 |
| C9orf152   | -0.04384 |
| DHX35      | -0.04387 |
| FNDC3A     | -0.04388 |
| CALR       | -0.04389 |
| NSL1       | -0.04395 |
| KDM2A      | -0.04397 |
| OLMALINC   | -0.04398 |
| GTF2E2     | -0.04403 |
| GTF3C6     | -0.04404 |
| AC093909.6 | -0.04405 |
| LDLRAD2    | -0.04408 |
| ARV1       | -0.04413 |
| DTWD1      | -0.04413 |
| TIMM8AP1   | -0.04414 |
| AL122010.1 | -0.04414 |
| CTR9       | -0.04414 |
| UQCC1      | -0.04416 |
| POMP       | -0.04418 |
| TEC        | -0.0442  |
| TRIM25     | -0.04422 |
| CCL23      | -0.04424 |
| FES        | -0.04434 |
| ROM1       | -0.04434 |
| PDE6D      | -0.04436 |
| CPSF2      | -0.04439 |
| AC245060.4 | -0.04439 |

|            |          |
|------------|----------|
| ARNT2      | -0.0444  |
| KLF7       | -0.04442 |
| SLC39A9    | -0.04443 |
| EHF        | -0.04443 |
| ADCY9      | -0.04445 |
| TP73-AS1   | -0.04446 |
| AL049873.2 | -0.04454 |
| EIF5       | -0.04458 |
| SLC25A46   | -0.04459 |
| NDUFS3     | -0.0446  |
| SEMA5B     | -0.04462 |
| ZNF354C    | -0.04464 |
| KMT2B      | -0.04465 |
| CPNE3      | -0.04465 |
| FASTKD1    | -0.04467 |
| GSDMC      | -0.04471 |
| ARAF       | -0.04473 |
| PHLDB3     | -0.04476 |
| TAB2       | -0.04481 |
| NEMP2      | -0.04483 |
| CCDC80     | -0.04485 |
| AC027796.4 | -0.04485 |
| DLG5-AS1   | -0.04491 |
| ZFYVE27    | -0.04491 |
| AL359881.1 | -0.04494 |
| MAP3K9     | -0.04494 |
| MBD5       | -0.04494 |
| C12orf76   | -0.04495 |
| MIR4701    | -0.045   |
| ZBTB2      | -0.04505 |
| SNRPD1     | -0.04505 |
| SPOCK3     | -0.04507 |
| PDSS1      | -0.04507 |
| AL133466.1 | -0.04509 |
| KCTD13     | -0.04511 |
| SRSF4      | -0.04512 |
| HOXD1      | -0.04518 |
| GOLGA4     | -0.0452  |
| AP001024.1 | -0.04522 |
| TIMM50     | -0.04524 |
| USP9X      | -0.04524 |
| ZNF584     | -0.04528 |
| PGS1       | -0.04528 |
| PPAN       | -0.04529 |
| CASP3      | -0.04533 |
| NPC1       | -0.04534 |
| ST6GALNAC6 | -0.04534 |
| AVPR1A     | -0.04535 |
| GDI2       | -0.04537 |

|            |          |
|------------|----------|
| HSPA1L     | -0.04538 |
| KAT6A      | -0.04546 |
| PIBF1      | -0.04551 |
| PPP4R2     | -0.04552 |
| CCN5       | -0.04555 |
| ZCCHC10    | -0.04564 |
| USP25      | -0.04564 |
| AL357140.2 | -0.04567 |
| SLCO3A1    | -0.04569 |
| ZNF45      | -0.04571 |
| CCDC183    | -0.04574 |
| XRCC1      | -0.04574 |
| AC008443.4 | -0.04575 |
| JUN        | -0.04578 |
| RPA2       | -0.0458  |
| GNRHR2     | -0.04581 |
| METTL14    | -0.04582 |
| IRAG1      | -0.04584 |
| PCDHB16    | -0.04584 |
| DAAM1      | -0.04585 |
| WDR11      | -0.04585 |
| FCHO2      | -0.04588 |
| AL049870.3 | -0.0459  |
| RAB11FIP2  | -0.04592 |
| CLEC16A    | -0.04593 |
| SUCO       | -0.04593 |
| SON        | -0.04594 |
| ABCC9      | -0.04594 |
| G2E3       | -0.04596 |
| NUFIP2     | -0.04603 |
| COMTD1     | -0.04603 |
| AC010894.1 | -0.04604 |
| PNPT1      | -0.04608 |
| RSF1       | -0.04608 |
| AC006001.2 | -0.0461  |
| TRMT44     | -0.04613 |
| GGT5       | -0.04616 |
| SNHG21     | -0.04617 |
| ARMCX1     | -0.04619 |
| LSM8       | -0.0462  |
| LRP3       | -0.04621 |
| SSBP2      | -0.04623 |
| ZNF197     | -0.04628 |
| RAB11FIP4  | -0.04628 |
| SNORA77    | -0.04628 |
| QDPR       | -0.04632 |
| AC012313.1 | -0.04633 |
| BMI1       | -0.04636 |
| AC064836.2 | -0.04638 |

|            |          |
|------------|----------|
| ADIRF-AS1  | -0.04645 |
| DNAJC28    | -0.04647 |
| MYLK-AS1   | -0.04647 |
| SULT1C4    | -0.04648 |
| SLC12A6    | -0.04649 |
| PMS2P4     | -0.04649 |
| MEX3C      | -0.04656 |
| AC008966.2 | -0.04657 |
| NUDT7      | -0.04657 |
| EIF1       | -0.04659 |
| XPA        | -0.04659 |
| SS18L1     | -0.04659 |
| SCRIB      | -0.0466  |
| GINS1      | -0.04663 |
| FBXW9      | -0.04667 |
| SMIM4      | -0.04668 |
| BBS10      | -0.04668 |
| TBC1D22A   | -0.04671 |
| ZFHX3      | -0.04671 |
| GSE1       | -0.04672 |
| MRTFA      | -0.04672 |
| HS1BP3     | -0.04673 |
| HOXB2      | -0.04673 |
| UBA52      | -0.04676 |
| TTF2       | -0.04678 |
| MTIF3      | -0.04686 |
| RPSAP19    | -0.04687 |
| GATD1      | -0.0469  |
| ASCC3      | -0.04692 |
| MRPS6      | -0.04698 |
| ZNF530     | -0.04698 |
| SYCE1L     | -0.047   |
| U91328.1   | -0.04701 |
| TNKS2      | -0.04701 |
| EHMT1      | -0.04702 |
| AC073343.1 | -0.04702 |
| PTOV1-AS1  | -0.04702 |
| TRIM15     | -0.04702 |
| PRDM10     | -0.04706 |
| MGME1      | -0.04709 |
| SMAD4      | -0.0471  |
| PLA2G15    | -0.04718 |
| CYP1B1     | -0.04718 |
| PAK1       | -0.0472  |
| MUTYH      | -0.0472  |
| WRAP73     | -0.04723 |
| CNOT11     | -0.04724 |
| KIF26B     | -0.04725 |
| AC010422.3 | -0.04727 |

|            |          |
|------------|----------|
| NDUFV2     | -0.04727 |
| PHF12      | -0.04731 |
| BCAT2      | -0.04731 |
| KIF3B      | -0.04732 |
| COX16      | -0.04734 |
| MIR6772    | -0.04738 |
| JPX        | -0.0474  |
| POLD4      | -0.0474  |
| RNF43      | -0.04745 |
| JUNB       | -0.04752 |
| ELF2       | -0.04753 |
| HAUS6      | -0.04757 |
| ZNF320     | -0.04759 |
| ZCCHC3     | -0.04759 |
| ZC3H10     | -0.0476  |
| MMAA       | -0.04762 |
| DHRS7B     | -0.04763 |
| STARD7-AS1 | -0.04765 |
| YPEL3      | -0.04768 |
| CAPZB      | -0.0477  |
| TIGD7      | -0.04771 |
| NKX2-1-AS1 | -0.04775 |
| RBBP6      | -0.04786 |
| CADM1      | -0.0479  |
| LMAN1      | -0.04794 |
| ZCCHC4     | -0.04794 |
| ZC3HAV1    | -0.04797 |
| CCNJ       | -0.04799 |
| ALG10      | -0.04802 |
| RUBCN      | -0.04802 |
| L3MBTL3    | -0.04803 |
| INO80B     | -0.04807 |
| CAPN7      | -0.04809 |
| BEX4       | -0.04814 |
| MRPL42     | -0.04814 |
| FARP2      | -0.04818 |
| SLC25A20   | -0.04819 |
| SRI        | -0.0482  |
| PSMB5      | -0.04822 |
| RAB3IL1    | -0.04826 |
| FAM102B    | -0.04827 |
| SEMA5A     | -0.04828 |
| ABI1       | -0.04833 |
| ZNF321P    | -0.04834 |
| MTURN      | -0.04834 |
| PLCD4      | -0.04837 |
| AC073896.3 | -0.04838 |
| MINCR      | -0.04842 |
| ARMH3      | -0.04843 |

|            |          |
|------------|----------|
| CEP70      | -0.04844 |
| PHKG2      | -0.04845 |
| SAMD8      | -0.04847 |
| ESYT3      | -0.04853 |
| RPL10      | -0.04855 |
| UBN2       | -0.04855 |
| SF3B5      | -0.04859 |
| PRKCZ-AS1  | -0.04861 |
| FYCO1      | -0.04863 |
| UQCC3      | -0.04876 |
| DIS3L2     | -0.04876 |
| CX3CL1     | -0.04881 |
| RAP2C      | -0.04886 |
| TMPO-AS1   | -0.04886 |
| VPS41      | -0.04888 |
| REXO1      | -0.04891 |
| ZNF567     | -0.04892 |
| MIR503HG   | -0.04895 |
| STARD13    | -0.04895 |
| SLIRP      | -0.04903 |
| DIMT1      | -0.04903 |
| C1GALT1C1  | -0.04903 |
| NEDD8      | -0.04907 |
| OSBPL10    | -0.04907 |
| UQCC2      | -0.0491  |
| HIKESHI    | -0.04912 |
| NDUFA11    | -0.04915 |
| SNX6       | -0.04917 |
| FBXO38     | -0.04917 |
| MSANTD4    | -0.04923 |
| HNRNPUL2   | -0.04927 |
| AP3M2      | -0.04928 |
| AMBRA1     | -0.04929 |
| RAP1GAP2   | -0.04931 |
| DCAF17     | -0.04932 |
| NIPSNAP3A  | -0.04936 |
| ESAM       | -0.04937 |
| SUB1       | -0.04939 |
| CDON       | -0.04944 |
| CAMTA2     | -0.04945 |
| PHF2       | -0.04945 |
| LINC01436  | -0.04946 |
| TBCK       | -0.04948 |
| SAMD9      | -0.04952 |
| YTHDC1     | -0.0496  |
| PRB4       | -0.0496  |
| AP002990.1 | -0.04961 |
| MIF-AS1    | -0.04964 |
| POU5F1     | -0.04965 |

|            |          |
|------------|----------|
| ZNF766     | -0.04971 |
| SERPINB8   | -0.04971 |
| AC091057.1 | -0.04972 |
| AC138356.2 | -0.04972 |
| PECR       | -0.04973 |
| USP30      | -0.04975 |
| MAPK8IP1   | -0.04976 |
| IDNK       | -0.04981 |
| PRDX2      | -0.04988 |
| ANKRD42    | -0.04993 |
| ATP6V0D1   | -0.04998 |
| KAT2A      | -0.04999 |
| AL135905.1 | -0.05002 |
| SAAL1      | -0.05005 |
| HGH1       | -0.0501  |
| HSD17B12   | -0.0501  |
| OSBPL7     | -0.05013 |
| CLBA1      | -0.05017 |
| RERE       | -0.05017 |
| COX10-AS1  | -0.05019 |
| MT-ND4L    | -0.05026 |
| TTC17      | -0.05027 |
| RPP14      | -0.05028 |
| CDK12      | -0.05029 |
| AC006504.5 | -0.05031 |
| HIGD1B     | -0.05034 |
| FBXO11     | -0.05037 |
| RPS16      | -0.05038 |
| MROH1      | -0.05038 |
| CD81       | -0.05039 |
| ZNF761     | -0.05039 |
| FBH1       | -0.0504  |
| C2orf42    | -0.05043 |
| AL137186.2 | -0.05046 |
| BBS2       | -0.05046 |
| MOSPD1     | -0.05046 |
| PPM1F      | -0.05048 |
| LINC00630  | -0.05051 |
| HSPE1      | -0.05052 |
| UBR2       | -0.05052 |
| RAP1GDS1   | -0.05052 |
| CSNK1G2    | -0.05054 |
| MIS12      | -0.05056 |
| AC090114.2 | -0.05059 |
| ORAI2      | -0.0506  |
| SENP5      | -0.05061 |
| EXOC3L1    | -0.05067 |
| GSPT2      | -0.05067 |
| SULT1A2    | -0.05068 |



|             |          |
|-------------|----------|
| MBD4        | -0.05069 |
| MTRF1L      | -0.05071 |
| MANBA       | -0.05075 |
| KLHL8       | -0.05075 |
| IFTAP       | -0.05076 |
| PSMG2       | -0.05081 |
| TUT4        | -0.05086 |
| GAS8        | -0.05088 |
| NDUFA3      | -0.05089 |
| COMMD8      | -0.05091 |
| TEFM        | -0.05093 |
| IQCA1       | -0.05095 |
| UBP1        | -0.05095 |
| SESTD1      | -0.05096 |
| CENPBD1P1   | -0.05097 |
| IFITM3      | -0.05097 |
| LIN54       | -0.05098 |
| ATG4B       | -0.051   |
| MRPL23      | -0.05101 |
| AC008537.3  | -0.05104 |
| MICU2       | -0.05109 |
| GS1-124K5.4 | -0.05115 |
| PROB1       | -0.05116 |
| TRMO        | -0.05119 |
| MAGT1       | -0.0512  |
| BRD7        | -0.0513  |
| C17orf113   | -0.05136 |
| PARP1       | -0.05136 |
| MBNL2       | -0.05142 |
| SEC24A      | -0.05143 |
| BPHL        | -0.05147 |
| NSD1        | -0.05148 |
| AC140479.2  | -0.05148 |
| AL691432.2  | -0.05149 |
| ZNF597      | -0.0515  |
| TP53INP2    | -0.05151 |
| GTF2IRD2B   | -0.05151 |
| CSTF3       | -0.05153 |
| ZNF552      | -0.05155 |
| WDR89       | -0.05156 |
| CLCN7       | -0.05156 |
| RPS3A       | -0.05164 |
| NSUN5P2     | -0.05165 |
| GRHPR       | -0.05166 |
| AC025181.2  | -0.05166 |
| TIGD1       | -0.05169 |
| ANAPC5      | -0.05171 |
| TMEM204     | -0.0518  |
| PLSCR4      | -0.0518  |

|            |          |
|------------|----------|
| SEMA3A     | -0.05182 |
| ARMC1      | -0.05182 |
| TCEA1      | -0.05182 |
| KMT5C      | -0.05183 |
| TOX4       | -0.05187 |
| TDRKH-AS1  | -0.05188 |
| CDKL5      | -0.0519  |
| SYN1       | -0.0519  |
| MAP3K4     | -0.05192 |
| ATP6AP1    | -0.05197 |
| AC005332.6 | -0.05199 |
| BICRA      | -0.05199 |
| ITGB3BP    | -0.05201 |
| OS9        | -0.05204 |
| LINC00482  | -0.05206 |
| CYP4X1     | -0.05211 |
| UNK        | -0.05212 |
| ELOF1      | -0.05213 |
| RAB6B      | -0.05216 |
| RNF5P1     | -0.05222 |
| FLYWCH1    | -0.05229 |
| STEAP2     | -0.05233 |
| GALNT18    | -0.05233 |
| WWP2       | -0.05233 |
| AC244669.1 | -0.05238 |
| B3GLCT     | -0.05242 |
| FAR2       | -0.05243 |
| AP2A2      | -0.05244 |
| SLC38A5    | -0.05245 |
| NDUFAF4    | -0.05251 |
| KCTD6      | -0.05253 |
| DPM1       | -0.05258 |
| SEC63      | -0.05258 |
| GNB4       | -0.05259 |
| SGK2       | -0.05259 |
| MBD6       | -0.0526  |
| NUDT13     | -0.05261 |
| IFT122     | -0.05263 |
| VOPP1      | -0.05264 |
| CDK5RAP1   | -0.05265 |
| TBPL1      | -0.05265 |
| KLHL29     | -0.05268 |
| RNF115     | -0.05275 |
| CHST12     | -0.05275 |
| LINC01011  | -0.05281 |
| SRSF12     | -0.05285 |
| TOMM40L    | -0.05286 |
| SLC25A5    | -0.05287 |
| MED28      | -0.053   |

|            |          |
|------------|----------|
| METTL1     | -0.05304 |
| AP4E1      | -0.05306 |
| IBA57      | -0.05306 |
| ALG11      | -0.0531  |
| ATP13A1    | -0.05313 |
| DTNB       | -0.05313 |
| KLHL22     | -0.05314 |
| MFSD6      | -0.05314 |
| PLD1       | -0.0532  |
| EID2       | -0.05322 |
| UBA3       | -0.05325 |
| LINC00294  | -0.05325 |
| ANKRD13C   | -0.05329 |
| CCNH       | -0.05332 |
| AL008733.1 | -0.05334 |
| DMPK       | -0.05336 |
| MOAP1      | -0.05339 |
| CEP41      | -0.05341 |
| PLAA       | -0.05343 |
| DAPK2      | -0.05345 |
| KCTD18     | -0.05346 |
| SGPL1      | -0.05348 |
| CYP4B1     | -0.05351 |
| TPI1P2     | -0.05357 |
| ZNF569     | -0.0536  |
| FBXL19-AS1 | -0.0536  |
| SNHG28     | -0.05361 |
| TBC1D1     | -0.05366 |
| GJB1       | -0.05369 |
| C4orf46    | -0.05371 |
| ZNF772     | -0.05371 |
| CCNB1IP1   | -0.05373 |
| FCSK       | -0.0538  |
| DERL1      | -0.05382 |
| PIGBOS1    | -0.05386 |
| TDP1       | -0.0539  |
| ZNF703     | -0.05391 |
| MAGIX      | -0.05392 |
| PPP6R3     | -0.05396 |
| KIN        | -0.05398 |
| TDRD7      | -0.05399 |
| POC1B      | -0.05403 |
| MT-ATP8    | -0.05404 |
| SUDS3      | -0.05409 |
| ESCO1      | -0.05409 |
| RBM45      | -0.0541  |
| GALK2      | -0.05414 |
| DPP8       | -0.05416 |
| DCTN3      | -0.05416 |

|            |          |
|------------|----------|
| PKD1       | -0.05418 |
| AC024560.2 | -0.05421 |
| SNX3       | -0.05424 |
| EGLN2      | -0.05427 |
| FGF7P3     | -0.05431 |
| BOD1L1     | -0.05432 |
| NUP43      | -0.05433 |
| IFIT5      | -0.05434 |
| HEMK1      | -0.05439 |
| ZNF616     | -0.05441 |
| COPS5      | -0.05446 |
| FAM228B    | -0.05446 |
| EXOSC8     | -0.05451 |
| APOBEC2    | -0.05452 |
| VWA5A      | -0.05454 |
| ZSCAN32    | -0.05454 |
| LEPR       | -0.05454 |
| WEE1       | -0.05457 |
| GMPR       | -0.05458 |
| MOSMO      | -0.05459 |
| ZNF416     | -0.05461 |
| PRPF40B    | -0.05466 |
| AC046134.2 | -0.0547  |
| FOXJ3      | -0.0547  |
| MIPEP      | -0.05471 |
| SNX1       | -0.05474 |
| LRRFIP2    | -0.05474 |
| AC009506.1 | -0.05474 |
| FBXO9      | -0.05477 |
| KIF16B     | -0.05477 |
| SWT1       | -0.05478 |
| OLFML3     | -0.05478 |
| LIN7C      | -0.05483 |
| E4F1       | -0.05484 |
| LNX2       | -0.05484 |
| UNC50      | -0.05488 |
| EIF2S3     | -0.05488 |
| NRF1       | -0.05497 |
| MTPAP      | -0.05497 |
| ALDH2      | -0.055   |
| ZNF69      | -0.055   |
| GCFC2      | -0.055   |
| WTAP       | -0.05503 |
| ECSCR      | -0.05506 |
| PLEKHA3    | -0.05507 |
| INTS4      | -0.05508 |
| ST7L       | -0.05518 |
| CHD2       | -0.05518 |
| BMF        | -0.05521 |

|            |          |
|------------|----------|
| XPNPEP3    | -0.05521 |
| SRSF6      | -0.05522 |
| PELI1      | -0.05522 |
| AL023807.1 | -0.05525 |
| ATP5F1A    | -0.05526 |
| ARHGAP22   | -0.05527 |
| PTPMT1     | -0.05528 |
| MN1        | -0.05533 |
| AC002310.1 | -0.05546 |
| RPL22P2    | -0.05548 |
| GON4L      | -0.05549 |
| SLC35B1    | -0.0555  |
| CEP170     | -0.05552 |
| TXLNG      | -0.05552 |
| PROSER3    | -0.05552 |
| SPAG16     | -0.05553 |
| PACRGL     | -0.05555 |
| SLC22A18AS | -0.05555 |
| TMF1       | -0.05559 |
| AC125257.1 | -0.05559 |
| PRPF18     | -0.05562 |
| TRMT2B     | -0.05563 |
| ATG2A      | -0.05567 |
| SH3BGR     | -0.05569 |
| YOD1       | -0.05569 |
| IKZF5      | -0.0557  |
| LINC00869  | -0.05571 |
| SERP1      | -0.05572 |
| WASHC1     | -0.05573 |
| CABIN1     | -0.05577 |
| COA1       | -0.05578 |
| CDK19      | -0.05584 |
| AC115618.2 | -0.05588 |
| SMC5       | -0.05595 |
| OGA        | -0.05596 |
| TMPO       | -0.05597 |
| GFOD1      | -0.05598 |
| USP3       | -0.05599 |
| FLCN       | -0.056   |
| AL590705.3 | -0.05604 |
| ARRB1      | -0.05605 |
| RAB11FIP3  | -0.05607 |
| DBNDD2     | -0.05607 |
| RIOX1      | -0.05608 |
| SHB        | -0.05608 |
| MAN2A1     | -0.05609 |
| AHR        | -0.0561  |
| POMT1      | -0.05612 |
| DDI2       | -0.05615 |

|            |          |
|------------|----------|
| AC254562.3 | -0.0562  |
| TPPP       | -0.0562  |
| POLA2      | -0.05621 |
| GAK        | -0.05622 |
| USP53      | -0.05623 |
| MT-TT      | -0.05626 |
| MED12      | -0.05627 |
| XKR9       | -0.05633 |
| TET3       | -0.05636 |
| FAM3A      | -0.05637 |
| ZCCHC14    | -0.05638 |
| WDR86-AS1  | -0.05641 |
| SDHAF4     | -0.05645 |
| RPS27A     | -0.05646 |
| HSPA14     | -0.05649 |
| GANC       | -0.05651 |
| AIP        | -0.05652 |
| NPRL2      | -0.05654 |
| CDK1       | -0.05654 |
| HOMER1     | -0.05657 |
| MED16      | -0.05661 |
| ST6GALNAC1 | -0.05664 |
| PTCH1      | -0.05665 |
| ZNRF2      | -0.05667 |
| RPL17      | -0.05675 |
| USP24      | -0.05678 |
| ZNF646     | -0.0568  |
| SELENOH    | -0.05681 |
| CXXC1      | -0.05688 |
| THBS3      | -0.05689 |
| INO80C     | -0.0569  |
| QSER1      | -0.05693 |
| DAZAP1     | -0.05693 |
| MARCHF2    | -0.05694 |
| PARM1      | -0.05695 |
| FBXW2      | -0.05696 |
| TBC1D7     | -0.05697 |
| TMEM107    | -0.05702 |
| TOP2B      | -0.05706 |
| RBSN       | -0.05707 |
| NLK        | -0.05707 |
| PDE10A     | -0.05722 |
| HIVEP2     | -0.05725 |
| CLDND1     | -0.05728 |
| LSM6       | -0.0573  |
| CTSF       | -0.0573  |
| RHOT2      | -0.05732 |
| HMGB1P1    | -0.05732 |
| CCDC174    | -0.05739 |

|            |          |
|------------|----------|
| NRSN2-AS1  | -0.05743 |
| COL23A1    | -0.05745 |
| GRK4       | -0.05747 |
| SDCCAG8    | -0.05748 |
| ZDHHC6     | -0.05749 |
| TMEM159    | -0.0575  |
| SIDT2      | -0.05751 |
| RGS16      | -0.05763 |
| EGR1       | -0.05764 |
| AL589843.1 | -0.05764 |
| SNX5       | -0.05764 |
| PTGR2      | -0.05769 |
| MT-ND3     | -0.05769 |
| RNF19B     | -0.05769 |
| YLPM1      | -0.0577  |
| C19orf25   | -0.05771 |
| ZNF451     | -0.05772 |
| NDUFA9     | -0.05772 |
| CCNT2-AS1  | -0.05775 |
| SLC25A40   | -0.05775 |
| UPF3A      | -0.05776 |
| FKRP       | -0.05777 |
| CWC25      | -0.05785 |
| PATL1      | -0.05785 |
| ASH1L      | -0.05788 |
| CTDP1      | -0.05793 |
| ZNF570     | -0.05796 |
| C16orf87   | -0.05796 |
| EOLA2      | -0.05803 |
| ARHGEF37   | -0.05803 |
| LSR        | -0.05809 |
| DHRS4-AS1  | -0.05809 |
| RPRD1B     | -0.05811 |
| PLPP3      | -0.05811 |
| ALDH16A1   | -0.05811 |
| GSTO1      | -0.05811 |
| HSD11B2    | -0.05812 |
| AL645933.2 | -0.05817 |
| LRP1       | -0.05825 |
| DMAP1      | -0.05833 |
| DNAJC13    | -0.05836 |
| FANCD2     | -0.05839 |
| TEDC1      | -0.05842 |
| PREB       | -0.05845 |
| PACC1      | -0.05847 |
| TMEM185A   | -0.0585  |
| NFKB2      | -0.05853 |
| VAMP2      | -0.05854 |
| TDG        | -0.05856 |

|              |          |
|--------------|----------|
| TAB1         | -0.05856 |
| TAF3         | -0.05856 |
| ZNF565       | -0.05861 |
| FAM91A1      | -0.05861 |
| PAGR1        | -0.05861 |
| CLK3         | -0.05868 |
| AC109583.1   | -0.05869 |
| PAPOLA       | -0.0587  |
| AC004967.1   | -0.05871 |
| IL1B         | -0.05873 |
| ZFP92        | -0.05874 |
| API5         | -0.05877 |
| ANO7L1       | -0.05877 |
| AC068792.1   | -0.05881 |
| C8orf76      | -0.05882 |
| RP9P         | -0.05885 |
| TMED10       | -0.05886 |
| FAM217B      | -0.05887 |
| PDPK1        | -0.05887 |
| NEBL-AS1     | -0.05889 |
| MAPKAPK5-AS1 | -0.05891 |
| AC083964.1   | -0.05895 |
| LRRC8D       | -0.05899 |
| PIGX         | -0.059   |
| MAGI3        | -0.05901 |
| GIN1         | -0.05901 |
| EXOSC9       | -0.05905 |
| TOMM22       | -0.05907 |
| CNTN1        | -0.05908 |
| PTGES3P1     | -0.05909 |
| TBC1D10A     | -0.05909 |
| TNFRSF18     | -0.0591  |
| KDM5A        | -0.05913 |
| CLK2         | -0.05914 |
| PRR14L       | -0.05916 |
| RAB42        | -0.05921 |
| CRYZL1       | -0.05927 |
| ZNF446       | -0.05927 |
| PSMD13       | -0.05928 |
| AL121753.2   | -0.05934 |
| ZNF621       | -0.05941 |
| REPIN1       | -0.05947 |
| SRSF10       | -0.0595  |
| ZNF653       | -0.05951 |
| AARSD1       | -0.05951 |
| RBMX         | -0.05952 |
| ATP5F1C      | -0.05953 |
| PRMT7        | -0.05953 |
| COX17        | -0.05957 |



|            |          |
|------------|----------|
| TMEM86B    | -0.05958 |
| AKIRIN2    | -0.05962 |
| GZF1       | -0.05962 |
| STARD7     | -0.05964 |
| CERS6      | -0.05965 |
| GRINA      | -0.05966 |
| KLF13      | -0.05969 |
| ATG3       | -0.05978 |
| FITM2      | -0.05978 |
| WNT2       | -0.0598  |
| AC098592.1 | -0.05984 |
| AC005261.3 | -0.05986 |
| ZNF879     | -0.05988 |
| C11orf96   | -0.05988 |
| PAPOLG     | -0.05991 |
| LINC02449  | -0.05992 |
| SNED1      | -0.05992 |
| UQCR11     | -0.05994 |
| CCDC142    | -0.05998 |
| TMEM259    | -0.05998 |
| DCAF13     | -0.06002 |
| ANAPC10    | -0.06003 |
| NR6A1      | -0.06003 |
| ZBTB33     | -0.06007 |
| SERAC1     | -0.06008 |
| ZNF346     | -0.06009 |
| SEC61B     | -0.06011 |
| NPDC1      | -0.06014 |
| PCMTD2     | -0.06019 |
| MIGA2      | -0.06019 |
| CCDC59     | -0.06026 |
| RSBN1L     | -0.06032 |
| IGFBP7     | -0.06034 |
| REXO5      | -0.06036 |
| DHFR2      | -0.06037 |
| NARS2      | -0.06037 |
| TRMT11     | -0.06038 |
| FBXL20     | -0.0604  |
| HIPK2      | -0.06041 |
| RP2        | -0.06043 |
| C3orf38    | -0.06044 |
| RBM43      | -0.06044 |
| ADGRA2     | -0.06045 |
| SCGB2A1    | -0.0605  |
| AL512408.1 | -0.06052 |
| PPP1R15A   | -0.06059 |
| CIR1       | -0.06064 |
| UBA5       | -0.06066 |
| TMEM30A    | -0.06067 |

|            |          |
|------------|----------|
| CDKAL1     | -0.06068 |
| OPHN1      | -0.06069 |
| SMU1       | -0.06069 |
| SREBF2-AS1 | -0.06069 |
| CCDC22     | -0.06073 |
| AGAP1      | -0.06077 |
| BEX2       | -0.06077 |
| FXD5       | -0.0608  |
| PHF1       | -0.0608  |
| AC083799.1 | -0.06082 |
| HSPH1      | -0.06082 |
| PSMB3      | -0.06091 |
| AC022784.5 | -0.06091 |
| GOLGA2P10  | -0.06092 |
| MAPKBP1    | -0.06094 |
| RPARP-AS1  | -0.06095 |
| LPIN3      | -0.06095 |
| THUMPD1    | -0.06096 |
| PISD       | -0.06096 |
| HCG11      | -0.06099 |
| CRTC1      | -0.06101 |
| CIAO2B     | -0.06105 |
| CDADC1     | -0.06106 |
| AC241585.1 | -0.0611  |
| WWP1       | -0.06111 |
| PNPLA6     | -0.06111 |
| KITLG      | -0.06111 |
| BEND7      | -0.06116 |
| ANAPC7     | -0.06117 |
| AL355001.2 | -0.06118 |
| FAM241A    | -0.06119 |
| APPL1      | -0.06123 |
| PLB1       | -0.06128 |
| OTUD6B-AS1 | -0.06129 |
| LINC00899  | -0.0613  |
| SLC22A23   | -0.06132 |
| KCNK15     | -0.06132 |
| TBC1D15    | -0.06141 |
| ZNF445     | -0.06142 |
| YAE1       | -0.06143 |
| FAAP24     | -0.06144 |
| TRIM23     | -0.0615  |
| CREB1      | -0.06153 |
| LINC01273  | -0.06159 |
| WDR73      | -0.06161 |
| USP49      | -0.06167 |
| GPR157     | -0.06167 |
| NMI        | -0.06167 |
| AC008875.1 | -0.0617  |

|            |          |
|------------|----------|
| PTPN13     | -0.06174 |
| CNTLN      | -0.06175 |
| PPP6R2     | -0.06177 |
| LSM7       | -0.06177 |
| AC100810.1 | -0.06178 |
| ELF3-AS1   | -0.06178 |
| UIMC1      | -0.06179 |
| G RTP1     | -0.06185 |
| STRADB     | -0.06189 |
| ASB9       | -0.06189 |
| LRIG3      | -0.0619  |
| LRCH3      | -0.06194 |
| ACKR4      | -0.06196 |
| UNKL       | -0.06197 |
| SPEN       | -0.06197 |
| ZNF485     | -0.06197 |
| OMA1       | -0.06203 |
| GPR89B     | -0.06204 |
| GMPR2      | -0.06207 |
| SNHG11     | -0.0621  |
| ORMDL3     | -0.06213 |
| TAF6L      | -0.06214 |
| EIF3K      | -0.06222 |
| INSIG1-DT  | -0.06229 |
| ZNF347     | -0.0623  |
| AC093157.1 | -0.0623  |
| POC5       | -0.06234 |
| KMT2D      | -0.06237 |
| AL356740.1 | -0.06237 |
| MRPL21     | -0.06238 |
| ZNF684     | -0.06244 |
| SEMA6A     | -0.06249 |
| DMD        | -0.06249 |
| UBXN2B     | -0.06251 |
| SMAP1      | -0.06254 |
| PINX1      | -0.06261 |
| C1orf112   | -0.06264 |
| TRIM13     | -0.06265 |
| AC006237.1 | -0.06269 |
| YIF1B      | -0.06272 |
| AMT        | -0.06274 |
| CTSK       | -0.06274 |
| ZNF816     | -0.06275 |
| DDHD2      | -0.06283 |
| ZNF138     | -0.06286 |
| ZRANB2     | -0.06287 |
| CEP112     | -0.06289 |
| RNF114     | -0.06289 |
| CASD1      | -0.06291 |

|            |          |
|------------|----------|
| PTCD3      | -0.06299 |
| RPL10P6    | -0.06299 |
| PAXX       | -0.063   |
| XIAP       | -0.06301 |
| DNPEP      | -0.06303 |
| SELENOM    | -0.0631  |
| SBF2-AS1   | -0.0631  |
| PACERR     | -0.06311 |
| ASF1A      | -0.06313 |
| KCTD9      | -0.06314 |
| BICD2      | -0.06324 |
| FBXO3      | -0.06325 |
| ZNF497     | -0.06332 |
| ERG        | -0.06336 |
| DSCC1      | -0.06349 |
| DNAJC3     | -0.06354 |
| NEK7       | -0.06355 |
| ZNF511     | -0.06355 |
| FAM50A     | -0.06358 |
| BTC        | -0.06358 |
| EMC1-AS1   | -0.06359 |
| DLG4       | -0.06364 |
| APC        | -0.06364 |
| ATP2C1     | -0.06372 |
| COQ8B      | -0.06374 |
| C2orf49    | -0.06374 |
| NADSYN1    | -0.06376 |
| PCED1B     | -0.0638  |
| RANBP2     | -0.06383 |
| CD164      | -0.06387 |
| MCEE       | -0.06389 |
| MBNL1      | -0.06391 |
| ASAH1      | -0.06398 |
| EBAG9      | -0.064   |
| AC011476.3 | -0.06403 |
| TMLHE      | -0.06404 |
| CALM2      | -0.06404 |
| AP001160.3 | -0.06404 |
| FAM98C     | -0.06404 |
| ZXDB       | -0.06405 |
| USP48      | -0.06409 |
| IL32       | -0.06409 |
| MT-RNR2    | -0.06411 |
| ZNF471     | -0.06411 |
| KLHL5      | -0.06411 |
| ING3       | -0.06416 |
| CCNP       | -0.06417 |
| ALKBH2     | -0.06419 |
| ZMYM2      | -0.0642  |

|            |          |
|------------|----------|
| PRKAR2B    | -0.06423 |
| NDUFAF7    | -0.06424 |
| DYRK1B     | -0.06425 |
| TAS2R5     | -0.06427 |
| DOCK6      | -0.06427 |
| MBD1       | -0.06428 |
| SERPINB9P1 | -0.06429 |
| SV2A       | -0.06429 |
| TASOR      | -0.06431 |
| ASXL1      | -0.06433 |
| NOTCH1     | -0.06433 |
| MED26      | -0.06433 |
| ATP6V0A1   | -0.06434 |
| ENOPH1     | -0.06438 |
| PEBP1      | -0.06441 |
| NUDT9      | -0.06443 |
| MORN1      | -0.06444 |
| FMC1       | -0.06444 |
| ZNF461     | -0.06447 |
| ZNF462     | -0.06449 |
| STAT3      | -0.06452 |
| ZNF280C    | -0.06454 |
| ZNF324     | -0.06457 |
| SRSF7      | -0.06457 |
| OTUD6B     | -0.06457 |
| COL4A4     | -0.06461 |
| H3-3A      | -0.06469 |
| AC068533.2 | -0.06472 |
| PPP2R5C    | -0.06474 |
| ESPN       | -0.06475 |
| ATG4D      | -0.06476 |
| FGFR1OP2   | -0.06477 |
| KBTBD3     | -0.06483 |
| INO80E     | -0.0649  |
| THRB       | -0.06496 |
| TRABD      | -0.06497 |
| NOP53      | -0.06501 |
| RNFT1      | -0.06504 |
| MAPK1IP1L  | -0.06505 |
| RSL24D1    | -0.06508 |
| FAM219A    | -0.06508 |
| ATP8A1     | -0.06517 |
| MTATP6P1   | -0.06519 |
| DHRS7      | -0.06522 |
| PRKACA     | -0.06525 |
| ARHGAP27   | -0.06533 |
| WDR59      | -0.06535 |
| RAPGEF3    | -0.06543 |
| USP18      | -0.06545 |

|            |          |
|------------|----------|
| RNF34      | -0.06549 |
| MRPS14     | -0.06549 |
| NCK1-DT    | -0.06549 |
| AC008669.1 | -0.06551 |
| CAMKMT     | -0.06557 |
| ACOT2      | -0.06561 |
| CILK1      | -0.06563 |
| PLEKHM3    | -0.06565 |
| ZDHHC24    | -0.06565 |
| SETD5      | -0.06566 |
| POLA1      | -0.06567 |
| SLC66A2    | -0.06568 |
| TTC9C      | -0.06572 |
| SLC7A6OS   | -0.06577 |
| IRF2BPL    | -0.06578 |
| SMG9       | -0.06581 |
| POLR2G     | -0.06586 |
| STXBP1     | -0.06587 |
| UBE2G2     | -0.0659  |
| LINC00674  | -0.0659  |
| RIC8B      | -0.06591 |
| AC005332.3 | -0.066   |
| JADE2      | -0.06603 |
| ZNF547     | -0.06604 |
| AP006623.1 | -0.06604 |
| AL121906.2 | -0.06609 |
| ECM2       | -0.06611 |
| UBR7       | -0.06614 |
| SH3GLB2    | -0.06618 |
| CEP164     | -0.06619 |
| UNC119     | -0.06626 |
| AC080013.3 | -0.06626 |
| PTPN3      | -0.06629 |
| UPRT       | -0.06639 |
| USP16      | -0.0664  |
| WDR20      | -0.06642 |
| TPP2       | -0.06645 |
| ZNF701     | -0.06648 |
| VPS4B      | -0.0665  |
| CAPRIN2    | -0.06651 |
| NPHP4      | -0.06653 |
| BAMBI      | -0.06654 |
| PIAS1      | -0.06656 |
| EWSR1      | -0.06656 |
| C6orf141   | -0.06658 |
| LRRC29     | -0.06658 |
| ZNF747     | -0.06665 |
| RABEP1     | -0.06666 |
| FOXO4      | -0.06666 |

|            |          |
|------------|----------|
| RMDN1      | -0.06669 |
| ST6GALNAC4 | -0.06673 |
| ZNF554     | -0.06679 |
| WASL-DT    | -0.0668  |
| MAP4K2     | -0.0668  |
| SNORD100   | -0.06682 |
| ZC3H12C    | -0.06683 |
| ZNF641     | -0.06683 |
| FOXF2      | -0.06686 |
| RHOXF1-AS1 | -0.06687 |
| RBM17      | -0.06694 |
| SLC10A7    | -0.06697 |
| C18orf32   | -0.06698 |
| PARP2      | -0.06701 |
| GEMIN7     | -0.06718 |
| KMT2E      | -0.06719 |
| CNIH2      | -0.06719 |
| IL10RB     | -0.0672  |
| RCOR3      | -0.0672  |
| MAP3K10    | -0.06722 |
| SNX16      | -0.06722 |
| EXOC8      | -0.06722 |
| LRRC14     | -0.06723 |
| MED6       | -0.06726 |
| USP12      | -0.06729 |
| AC007342.8 | -0.06729 |
| CCDC93     | -0.06729 |
| AL589843.2 | -0.06731 |
| VPS16      | -0.06732 |
| IGIP       | -0.06732 |
| NDUFS7     | -0.06736 |
| GALNT10    | -0.06737 |
| CMTR2      | -0.0674  |
| SETD3      | -0.06742 |
| ZNF627     | -0.06744 |
| SNRPGP2    | -0.06748 |
| BNIP2      | -0.0675  |
| FBXO25     | -0.06758 |
| POLR3F     | -0.06758 |
| INIP       | -0.06759 |
| DYNC2LI1   | -0.06766 |
| AP001029.1 | -0.06771 |
| C17orf80   | -0.06771 |
| IRX2       | -0.06774 |
| ZADH2      | -0.06778 |
| HLA-F-AS1  | -0.0678  |
| XPO6       | -0.0678  |
| TADA2A     | -0.0678  |
| ZNF638     | -0.06781 |

|            |          |
|------------|----------|
| PSD3       | -0.06786 |
| DPY19L3    | -0.06787 |
| GABPB1     | -0.06787 |
| ZBTB34     | -0.06789 |
| SGCE       | -0.06791 |
| TPP1       | -0.06792 |
| TP63       | -0.06795 |
| NANP       | -0.06798 |
| CRYL1      | -0.06801 |
| ABCD3      | -0.06805 |
| DGKZ       | -0.06805 |
| NIPAL3     | -0.06806 |
| STK11      | -0.06809 |
| EOGT       | -0.06814 |
| CYCSP10    | -0.06817 |
| GLRX3      | -0.06817 |
| FAM122B    | -0.06817 |
| ANKRD28    | -0.06818 |
| MRPL50     | -0.0682  |
| ZNF525     | -0.06821 |
| MKNK1      | -0.06821 |
| HAUS5      | -0.06822 |
| MKLN1      | -0.06825 |
| MIR6797    | -0.06827 |
| FAM117B    | -0.06828 |
| PODN       | -0.06833 |
| ZNF428     | -0.06839 |
| WHAMM      | -0.0684  |
| WDTC1      | -0.06842 |
| BCLAF1     | -0.06843 |
| SGPP2      | -0.06843 |
| SPRY1      | -0.06848 |
| POLR2J4    | -0.0685  |
| TOR2A      | -0.06853 |
| SYNM       | -0.06853 |
| THOC2      | -0.06854 |
| CUTC       | -0.06859 |
| DOC2A      | -0.06861 |
| AC064807.4 | -0.06864 |
| C14orf93   | -0.06869 |
| RGL3       | -0.06869 |
| TSPYL4     | -0.0687  |
| PANK2      | -0.06872 |
| INTS2      | -0.06874 |
| TMEM131    | -0.06874 |
| GRIPAP1    | -0.06876 |
| HNRNPCP7   | -0.06879 |
| AL117336.2 | -0.0688  |
| GALNT1     | -0.06883 |



|            |          |
|------------|----------|
| ZKSCAN2    | -0.06887 |
| PHF6       | -0.06888 |
| B3GALNT2   | -0.06891 |
| LINC01569  | -0.06892 |
| VPS36      | -0.069   |
| SNX13      | -0.06901 |
| SLC2A11    | -0.06901 |
| NHLRC2     | -0.06902 |
| ISLR       | -0.06904 |
| MAT2A      | -0.06905 |
| AL355353.1 | -0.06905 |
| LIN52      | -0.06906 |
| MYL5       | -0.06911 |
| ZNF836     | -0.06913 |
| ZNF180     | -0.06913 |
| TRMT1      | -0.06915 |
| CCL11      | -0.06921 |
| PPP4R1-AS1 | -0.06925 |
| BIN1       | -0.0693  |
| Z95115.1   | -0.06932 |
| NFKBIB     | -0.06934 |
| DIP2A      | -0.06937 |
| RASEF      | -0.06941 |
| CLCC1      | -0.06947 |
| USP35      | -0.06947 |
| PAIP2      | -0.06949 |
| LHFPL3-AS2 | -0.06952 |
| FAM160B2   | -0.06954 |
| SLC9A3R1   | -0.06959 |
| SMIM3      | -0.06961 |
| DNAJC1     | -0.06967 |
| HSD17B7    | -0.06969 |
| OGFR       | -0.06971 |
| TNKS       | -0.06975 |
| STAG2      | -0.06978 |
| RBM34      | -0.06979 |
| RBFA       | -0.06981 |
| ZFP28      | -0.06982 |
| TCP11L1    | -0.06982 |
| EDEM1      | -0.06984 |
| SERINC5    | -0.06986 |
| AC026436.1 | -0.0699  |
| TATDN3     | -0.06991 |
| CASP4      | -0.06994 |
| CUL9       | -0.06995 |
| PHYHD1     | -0.07005 |
| KLHL25     | -0.07005 |
| HUNK       | -0.07007 |
| LCOR       | -0.07011 |

|             |          |
|-------------|----------|
| EVI5        | -0.07018 |
| LINC00526   | -0.07021 |
| TPM3P6      | -0.07022 |
| TTC30B      | -0.07023 |
| FRAT2       | -0.07023 |
| PRKCD       | -0.07024 |
| ARL5B       | -0.07025 |
| MTR         | -0.0703  |
| COMMD5      | -0.07033 |
| AP001528.1  | -0.07034 |
| TMEM199     | -0.07034 |
| AL035413.1  | -0.07037 |
| TPT1-AS1    | -0.07038 |
| PIGCP1      | -0.07039 |
| MIR6739     | -0.0704  |
| AC008481.1  | -0.07042 |
| ZGPAT       | -0.07043 |
| NCOA1       | -0.07044 |
| COQ6        | -0.07048 |
| PPP2R5E     | -0.07048 |
| IFT52       | -0.0705  |
| CP          | -0.07055 |
| CCNA1       | -0.07056 |
| AC116036.2  | -0.07057 |
| PPM1B       | -0.07062 |
| ZBTB3       | -0.07062 |
| PLEKHG1     | -0.07063 |
| ZNFX1       | -0.07064 |
| HORMAD2-AS1 | -0.07064 |
| EPHB1       | -0.07065 |
| ARL10       | -0.07067 |
| TP53RK      | -0.0707  |
| ACMSD       | -0.07071 |
| FAM3B       | -0.07077 |
| FBXO7       | -0.07085 |
| HIVEP1      | -0.07088 |
| TGFBR3      | -0.07088 |
| ROS1        | -0.07089 |
| HASPIN      | -0.07095 |
| MTLN        | -0.07096 |
| TIMM23B     | -0.07096 |
| ZBTB6       | -0.07102 |
| CCAR2       | -0.07103 |
| AC132938.3  | -0.07105 |
| ELMOD3      | -0.07107 |
| TP53I13     | -0.07108 |
| HMGN2P3     | -0.07112 |
| NAP1L5      | -0.07113 |
| P2RX4       | -0.07113 |

|            |          |
|------------|----------|
| NEIL1      | -0.07115 |
| ERLEC1     | -0.0712  |
| DUSP22     | -0.07124 |
| SPINK13    | -0.07125 |
| PURA       | -0.07126 |
| KHDC1      | -0.07126 |
| SNORD60    | -0.07128 |
| SLC25A30   | -0.07133 |
| RNU6-510P  | -0.07138 |
| AC018638.1 | -0.07139 |
| HMGB1P31   | -0.07139 |
| CPNE7      | -0.07143 |
| AC005696.1 | -0.07146 |
| ZNF326     | -0.07147 |
| ATF2       | -0.0715  |
| RNF6       | -0.07153 |
| AC093484.4 | -0.07155 |
| HINT2      | -0.07155 |
| UQCRBP1    | -0.07157 |
| SAV1       | -0.07161 |
| STAG3L5P   | -0.07161 |
| MFSD13A    | -0.07161 |
| ITM2B      | -0.07162 |
| MTHFR      | -0.07163 |
| EYA3       | -0.07163 |
| TMEM50B    | -0.07164 |
| MTND2P28   | -0.07165 |
| USP46-DT   | -0.07169 |
| ZMYND11    | -0.07171 |
| ITGA7      | -0.07172 |
| PAXIP1-AS2 | -0.07174 |
| AC006978.1 | -0.07177 |
| AL354696.1 | -0.07177 |
| SGMS2      | -0.07188 |
| DENND6A    | -0.07193 |
| SCAND1     | -0.07198 |
| BTN2A1     | -0.07204 |
| ZNF561     | -0.07204 |
| RSRC2      | -0.07205 |
| DIDO1      | -0.07206 |
| ATL1       | -0.07209 |
| CDC40      | -0.07209 |
| CACNB1     | -0.07209 |
| AC006001.4 | -0.0721  |
| COX6B1     | -0.07211 |
| HAUS4      | -0.07216 |
| RANBP3     | -0.07216 |
| ENGASE     | -0.07219 |
| ATP10D     | -0.07221 |

|            |          |
|------------|----------|
| ZRANB3     | -0.07223 |
| GMPPB      | -0.0723  |
| NTAN1      | -0.0723  |
| ZNF92      | -0.0723  |
| AC100803.3 | -0.07243 |
| SORBS3     | -0.0725  |
| CHST6      | -0.07257 |
| ZNF689     | -0.07257 |
| KCNN2      | -0.07258 |
| OXR1       | -0.07263 |
| BRWD3      | -0.07266 |
| LAMB2P1    | -0.07266 |
| SACM1L     | -0.07269 |
| SLF2       | -0.07269 |
| FBLN7      | -0.07271 |
| RNU6-88P   | -0.07272 |
| AC068338.3 | -0.07274 |
| TXNL1      | -0.07275 |
| AC093010.2 | -0.07276 |
| ESCO2      | -0.07279 |
| CHDH       | -0.07283 |
| SYTL1      | -0.07283 |
| CDC14B     | -0.07285 |
| XRCC3      | -0.07285 |
| AC020663.2 | -0.07291 |
| NRIP1      | -0.07298 |
| NRBF2P6    | -0.07301 |
| RSAD1      | -0.07302 |
| C2orf15    | -0.07303 |
| MITF       | -0.07305 |
| CASZ1      | -0.07306 |
| UBE2N      | -0.07306 |
| ZNF800     | -0.0731  |
| ABHD10     | -0.07312 |
| DUOXA1     | -0.07312 |
| HEXB       | -0.07315 |
| C18orf25   | -0.07315 |
| FRMD4B     | -0.07323 |
| NPEPL1     | -0.07325 |
| DTNA       | -0.07325 |
| HACE1      | -0.07325 |
| ZNF587     | -0.07333 |
| CKLF       | -0.07341 |
| RPGRIP1L   | -0.07341 |
| AL031775.1 | -0.07341 |
| CCNC       | -0.07342 |
| MAU2       | -0.07348 |
| CMTM7      | -0.07348 |
| LRRK2-DT   | -0.07353 |

|             |          |
|-------------|----------|
| TRIM62      | -0.07353 |
| NNT-AS1     | -0.07361 |
| TNFSF4      | -0.07361 |
| ZNF304      | -0.07363 |
| CMC2        | -0.0737  |
| DDX24       | -0.07377 |
| PPP1R14C    | -0.0738  |
| TNFSF14     | -0.07381 |
| TNPO2       | -0.07382 |
| SYCE2       | -0.07387 |
| TCHP        | -0.07389 |
| AC121761.1  | -0.07393 |
| IDI1        | -0.07393 |
| LINC01560   | -0.07396 |
| HOOK1       | -0.07399 |
| TASP1       | -0.07411 |
| ZNF568      | -0.07413 |
| GPBP1       | -0.07414 |
| AC245884.12 | -0.07417 |
| CHD8        | -0.07419 |
| MLF1        | -0.07422 |
| PCBD2       | -0.07424 |
| USP31       | -0.07427 |
| ARIH2       | -0.07428 |
| OXA1L       | -0.07429 |
| AL354872.1  | -0.07431 |
| AC115618.1  | -0.07433 |
| SPRED1      | -0.07436 |
| B3GNT6      | -0.07437 |
| AP001189.3  | -0.0744  |
| AP000902.1  | -0.07441 |
| MYH11       | -0.07441 |
| CDV3        | -0.07446 |
| TAF9P3      | -0.07446 |
| NFKBIE      | -0.07451 |
| PDS5B       | -0.07453 |
| ZNF106      | -0.07454 |
| VPS54       | -0.07454 |
| ZNF606      | -0.07455 |
| AIFM1       | -0.07457 |
| RPL39P36    | -0.0746  |
| SBF1        | -0.07467 |
| MT-ATP6     | -0.07477 |
| MIR93       | -0.07478 |
| SNRPG       | -0.07479 |
| USF1        | -0.07483 |
| PPP1R2      | -0.07484 |
| COBLL1      | -0.07485 |
| PANK2-AS1   | -0.07492 |

|                        |          |
|------------------------|----------|
| MORC3                  | -0.07494 |
| COMMD1                 | -0.07496 |
| ECHDC2                 | -0.07498 |
| ACTR3                  | -0.075   |
| ZNF18                  | -0.075   |
| EEF1AKMT2              | -0.07503 |
| GGT7                   | -0.07504 |
| CCS                    | -0.07511 |
| SEPTIN9-DT             | -0.07511 |
| TCAP                   | -0.07514 |
| RAMP2                  | -0.07517 |
| C16orf46               | -0.0752  |
| AC015813.6             | -0.07522 |
| ZNF7                   | -0.07524 |
| SPG11                  | -0.07529 |
| SVIP                   | -0.07533 |
| ADARB1                 | -0.07536 |
| H2AZ2P1                | -0.07536 |
| TMEM19                 | -0.07539 |
| PHKG1                  | -0.07543 |
| CDPF1P1                | -0.07547 |
| AC027117.2             | -0.07551 |
| ALAS1                  | -0.07556 |
| NBEAL2                 | -0.07559 |
| XYLB                   | -0.07559 |
| STAG3L5P-PVRIG2P-PILRB | -0.07562 |
| HPS4                   | -0.07565 |
| ARID1B                 | -0.07565 |
| RIMS3                  | -0.07568 |
| ZNF8                   | -0.07569 |
| ZNF443                 | -0.07569 |
| MID2                   | -0.07576 |
| SNHG25                 | -0.07578 |
| AC002310.5             | -0.0758  |
| RALGAPB                | -0.07583 |
| NICN1                  | -0.07583 |
| NUMB                   | -0.07584 |
| URI1                   | -0.07585 |
| SPAG9                  | -0.07587 |
| ALG1L                  | -0.07588 |
| PDLIM3                 | -0.07591 |
| LYPLAL1                | -0.07592 |
| TBC1D2B                | -0.07592 |
| FBXL8                  | -0.07597 |
| COQ5                   | -0.07602 |
| TRAPPC10               | -0.07604 |
| NSMCE3                 | -0.07606 |
| CHN1                   | -0.07607 |
| DMTN                   | -0.07607 |

|            |          |
|------------|----------|
| ISG15      | -0.07608 |
| SYNJ1      | -0.07611 |
| AC019171.1 | -0.07612 |
| NAT14      | -0.07613 |
| ALS2       | -0.07614 |
| ELL2       | -0.07618 |
| CPSF6      | -0.0762  |
| NOG        | -0.07622 |
| AQP11      | -0.07623 |
| ATP13A3    | -0.07624 |
| CARS1      | -0.07624 |
| TRERF1     | -0.07625 |
| ABHD15     | -0.07625 |
| MNAT1      | -0.07641 |
| YPEL2      | -0.07641 |
| TAF2       | -0.07644 |
| RAB19      | -0.07644 |
| MIER1      | -0.07657 |
| ZNF764     | -0.0766  |
| KATNA1     | -0.0766  |
| LYRM1      | -0.07661 |
| AC012467.2 | -0.07661 |
| NUDT3      | -0.07662 |
| ZNF672     | -0.07664 |
| SRSF2      | -0.07666 |
| TMEM60     | -0.07671 |
| PTDSS1     | -0.07673 |
| RHOQ       | -0.07676 |
| ZSCAN18    | -0.07678 |
| RPIA       | -0.07684 |
| ACP3       | -0.07685 |
| PARD6A     | -0.0769  |
| PSMG1      | -0.0769  |
| EIF5A2     | -0.0769  |
| ZNF426     | -0.0769  |
| RCBTB1     | -0.07691 |
| CDS2       | -0.07698 |
| HMOX1      | -0.07702 |
| RBBP9      | -0.07707 |
| CACNB2     | -0.07713 |
| HPS5       | -0.07715 |
| SOX7       | -0.07723 |
| C2orf69    | -0.07725 |
| STARD4     | -0.07727 |
| RBPMS      | -0.07727 |
| AC022107.1 | -0.07728 |
| SGPP1      | -0.0773  |
| MTX3       | -0.07731 |
| MYO9A      | -0.07732 |

|            |          |
|------------|----------|
| MOB2       | -0.07737 |
| N4BP2      | -0.0774  |
| CHCHD6     | -0.07741 |
| FAM204A    | -0.07746 |
| CEP68      | -0.07746 |
| C17orf100  | -0.0775  |
| COQ7       | -0.07754 |
| TSC1       | -0.07754 |
| IFT88      | -0.07755 |
| MEMO1      | -0.07755 |
| KIAA0895L  | -0.07764 |
| MTHFSD     | -0.07764 |
| LARP1B     | -0.07785 |
| EOLA1      | -0.07789 |
| AC024933.1 | -0.0779  |
| SLC11A1    | -0.07793 |
| TMEM170A   | -0.07795 |
| SIGLEC12   | -0.07798 |
| LIMS2      | -0.07805 |
| DNAJC18    | -0.07807 |
| CAAP1      | -0.07808 |
| DHRS1      | -0.07812 |
| CADPS2     | -0.07813 |
| CRTC3      | -0.07814 |
| PCDHB10    | -0.07819 |
| MGA        | -0.07823 |
| SLC25A32   | -0.07823 |
| WDR83      | -0.07824 |
| NAV1       | -0.07826 |
| DUSP23     | -0.07829 |
| RASIP1     | -0.0783  |
| ITFG2      | -0.07836 |
| AC084880.1 | -0.07836 |
| GDAP2      | -0.07838 |
| C19orf18   | -0.07839 |
| CHST11     | -0.07841 |
| MCF2L-AS1  | -0.07843 |
| COX11      | -0.07843 |
| MTRES1     | -0.07849 |
| NFIX       | -0.07849 |
| RASGRF2    | -0.0785  |
| ABTB1      | -0.07853 |
| PTPDC1     | -0.07854 |
| PRKAB1     | -0.07855 |
| ADAT3      | -0.07855 |
| FANCA      | -0.07862 |
| FAM160A1   | -0.07864 |
| BOC        | -0.07865 |
| FAM50B     | -0.07866 |



|            |          |
|------------|----------|
| XPC        | -0.07868 |
| TIAM2      | -0.0787  |
| ZNF250     | -0.07873 |
| HNMT       | -0.07875 |
| LHFPL6     | -0.07878 |
| EDA        | -0.0788  |
| PRADC1     | -0.07889 |
| TLCD4      | -0.0789  |
| TIMM10B    | -0.07894 |
| RASSF10-DT | -0.07895 |
| PPP1R13B   | -0.07899 |
| IFT80      | -0.07903 |
| MFSD2A     | -0.07908 |
| SLCO4C1    | -0.07912 |
| TSPAN5     | -0.07913 |
| PDLIM2     | -0.0792  |
| SLC33A1    | -0.0793  |
| TEX30      | -0.0793  |
| MRPL34     | -0.0793  |
| ETNK1      | -0.07932 |
| TECPR1     | -0.07933 |
| VHL        | -0.07943 |
| CPPED1     | -0.07944 |
| AP001469.2 | -0.07948 |
| FAUP1      | -0.07957 |
| MRPL41     | -0.07959 |
| MED23      | -0.07961 |
| EMP3       | -0.07963 |
| AC104825.1 | -0.07964 |
| BBS12      | -0.07965 |
| TATDN2     | -0.07965 |
| MTMR9      | -0.07966 |
| POLR3GL    | -0.07972 |
| ZNF529-AS1 | -0.07984 |
| NAP1L1     | -0.07986 |
| ERP27      | -0.07987 |
| PRKD3      | -0.0799  |
| NKX2-1     | -0.07991 |
| AL357033.3 | -0.07991 |
| RNA5SP219  | -0.07991 |
| CALCOCO1   | -0.07994 |
| UBL5       | -0.07995 |
| LRRC37A16P | -0.07998 |
| GDI1       | -0.08002 |
| LENG1      | -0.08003 |
| ZNF251     | -0.08005 |
| STX17      | -0.08013 |
| PICK1      | -0.08015 |
| BTBD9      | -0.08017 |

|            |          |
|------------|----------|
| FRAT1      | -0.0802  |
| GNL3L      | -0.08021 |
| ARHGAP20   | -0.08022 |
| ARHGEF28   | -0.08025 |
| AC135178.4 | -0.08025 |
| ISCA1P4    | -0.08036 |
| CPNE1      | -0.08042 |
| RBM3       | -0.08047 |
| ZNF785     | -0.08047 |
| SDC3       | -0.08048 |
| ZDHHC23    | -0.08051 |
| GRB2       | -0.08062 |
| SIPA1L3    | -0.08063 |
| DCAF4      | -0.08066 |
| CNIH4      | -0.08071 |
| TRIR       | -0.08072 |
| AC135803.1 | -0.08073 |
| IDH1-AS1   | -0.08075 |
| MACROH2A1  | -0.08075 |
| PCYOX1L    | -0.08077 |
| NUP107     | -0.08084 |
| FBXL3      | -0.08096 |
| KDSR       | -0.08097 |
| PLD5       | -0.08098 |
| THYN1      | -0.08098 |
| RDH11      | -0.08102 |
| STK36      | -0.08103 |
| RPS28P5    | -0.08105 |
| TAOK1      | -0.08108 |
| RARB       | -0.0811  |
| UVRAG      | -0.08115 |
| WASH8P     | -0.08115 |
| KATNIP     | -0.08115 |
| CYB561D1   | -0.08122 |
| ADRB1      | -0.08125 |
| AC004477.2 | -0.08125 |
| P2RY6      | -0.08128 |
| PCDH17     | -0.08136 |
| METTL8     | -0.08137 |
| LZTR1      | -0.08138 |
| ABHD17B    | -0.08139 |
| LMOD1      | -0.08142 |
| SOAT1      | -0.08142 |
| RPS12P26   | -0.08144 |
| OGG1       | -0.08144 |
| MAT2B      | -0.08154 |
| PCED1A     | -0.08157 |
| GLDC       | -0.08157 |
| SCAF8      | -0.08162 |

|            |          |
|------------|----------|
| TFRC       | -0.08162 |
| ZBTB14     | -0.08167 |
| ZNF322     | -0.08167 |
| ENY2       | -0.08167 |
| RPS6KA1    | -0.08168 |
| FAM43A     | -0.08168 |
| LINC02604  | -0.08176 |
| GGACT      | -0.08179 |
| ZNF790     | -0.0818  |
| IQCC       | -0.08182 |
| LINC02482  | -0.08182 |
| ZNF680     | -0.08193 |
| OAZ1       | -0.08195 |
| PLEKHA1    | -0.08199 |
| SMIM26     | -0.082   |
| TRMU       | -0.08201 |
| AC069281.2 | -0.08203 |
| SCAPER     | -0.08206 |
| GSTK1      | -0.08207 |
| SPICE1     | -0.08208 |
| INVS       | -0.08211 |
| LATS1      | -0.08216 |
| LRRC8B     | -0.0822  |
| AL355803.1 | -0.0822  |
| TCTN1      | -0.08234 |
| MARS2      | -0.08237 |
| BEX5       | -0.08238 |
| CC2D1A     | -0.08238 |
| MID1IP1    | -0.08239 |
| GPR3       | -0.08241 |
| WRN        | -0.08245 |
| MRPL53     | -0.0825  |
| GSTA4      | -0.0825  |
| ADPGK      | -0.08251 |
| ZNF350-AS1 | -0.08255 |
| HAUS3      | -0.08259 |
| SRSF11     | -0.08263 |
| GNG11      | -0.0827  |
| LYRM7      | -0.08273 |
| MT-CO1     | -0.08275 |
| MBOAT1     | -0.08279 |
| HSPE1P2    | -0.08285 |
| SLC52A1    | -0.08287 |
| ANGEL2     | -0.08289 |
| SDF2L1     | -0.08289 |
| KIF2A      | -0.08291 |
| ZNF330     | -0.08291 |
| KCNIP3     | -0.08291 |
| AC145423.1 | -0.08291 |

|            |          |
|------------|----------|
| AC027575.2 | -0.08293 |
| PRKCE      | -0.08293 |
| AP001330.4 | -0.08294 |
| DNAJC24    | -0.08295 |
| NRBP2      | -0.08298 |
| ITM2C      | -0.08302 |
| MND1       | -0.08303 |
| CSF3R      | -0.08304 |
| USP38      | -0.08307 |
| ZNF860     | -0.08309 |
| AL596218.1 | -0.08315 |
| SETD2      | -0.08316 |
| AREL1      | -0.0832  |
| FAM200B    | -0.08321 |
| PRKAG2-AS1 | -0.08322 |
| CPSF1      | -0.08323 |
| M6PR       | -0.08323 |
| MTND4P12   | -0.08324 |
| MYBPHL     | -0.08325 |
| NARS1      | -0.08326 |
| SPCS2      | -0.08329 |
| ABRACL     | -0.08341 |
| ZMYM5      | -0.08343 |
| ZNF324B    | -0.08346 |
| DAZAP2P1   | -0.08352 |
| UBR3       | -0.08354 |
| AC009113.1 | -0.08354 |
| ERH        | -0.08355 |
| KCNK17     | -0.08356 |
| BNIP3P11   | -0.0836  |
| VAMP4      | -0.08362 |
| AC093227.1 | -0.08366 |
| LINC01389  | -0.08366 |
| D2HGDH     | -0.08367 |
| DYRK1A     | -0.08378 |
| LINC02035  | -0.08384 |
| CLTA       | -0.08386 |
| CICP14     | -0.08387 |
| AC090204.1 | -0.08393 |
| ANKS3      | -0.08394 |
| ARFGEF2    | -0.08397 |
| HSPB6      | -0.08401 |
| CYB5B      | -0.08409 |
| CHAC2      | -0.08409 |
| TUBGCP3    | -0.0841  |
| ZBTB43     | -0.08415 |
| UGT8       | -0.08416 |
| MGMT       | -0.08418 |
| EHD3       | -0.08419 |

|            |          |
|------------|----------|
| SNHG4      | -0.08425 |
| GTF2A1     | -0.08431 |
| URB1-AS1   | -0.08432 |
| AGBL5-IT1  | -0.08432 |
| TRIP11     | -0.08433 |
| NAGA       | -0.08435 |
| SNORA9B    | -0.08441 |
| ELP3       | -0.08445 |
| METTL25    | -0.0845  |
| APOD       | -0.08452 |
| AZIN1      | -0.08456 |
| CCDC32     | -0.08459 |
| MTRF1      | -0.08463 |
| TCEANC2    | -0.08466 |
| PER2       | -0.08467 |
| SPRING1    | -0.08468 |
| CNOT7      | -0.08476 |
| AC010973.2 | -0.08478 |
| ACTR10     | -0.08479 |
| MTF2       | -0.08482 |
| AC007485.1 | -0.08484 |
| CCDC134    | -0.08485 |
| RAP1A      | -0.08487 |
| ZSCAN31    | -0.08488 |
| ASTE1      | -0.08494 |
| PMS1       | -0.08498 |
| ING1       | -0.08499 |
| FUT6       | -0.08506 |
| AL450384.2 | -0.0851  |
| LIPT2      | -0.08521 |
| BAIAP3     | -0.08533 |
| CNEP1R1    | -0.08533 |
| SPATA33    | -0.08534 |
| ZNF623     | -0.08539 |
| SLC26A1    | -0.08539 |
| STK11IP    | -0.08542 |
| CBL        | -0.0855  |
| BDH2       | -0.08562 |
| SLC49A4    | -0.08567 |
| DTX4       | -0.08568 |
| LYN        | -0.08575 |
| STAG3L2    | -0.08581 |
| ZNF821     | -0.08581 |
| RAB8A      | -0.08586 |
| GPC4       | -0.08588 |
| DEFB1      | -0.08592 |
| HNRNPA3    | -0.08593 |
| PITPNM1    | -0.08593 |
| FKBP10     | -0.08598 |

|            |          |
|------------|----------|
| HEATR3     | -0.08599 |
| C7orf31    | -0.08602 |
| NT5DC1     | -0.08602 |
| ATG7       | -0.08612 |
| OASL       | -0.08613 |
| CCDC138    | -0.08614 |
| DENND4C    | -0.08618 |
| MCPH1      | -0.08622 |
| LRRC37A17P | -0.08624 |
| AGO4       | -0.08626 |
| TBC1D12    | -0.08629 |
| AL133520.1 | -0.0863  |
| SNORD123   | -0.0863  |
| FUNDC2     | -0.08631 |
| TERF2IP    | -0.08632 |
| VPS8       | -0.08641 |
| AC005261.1 | -0.08643 |
| ZDHHC1     | -0.08643 |
| NUDT4      | -0.08644 |
| MPHOSPH8   | -0.08644 |
| MIDEAS     | -0.08648 |
| ASXL2      | -0.08652 |
| DOT1L      | -0.08653 |
| PHF20L1    | -0.08654 |
| ADSL       | -0.08658 |
| NDUFA13    | -0.08659 |
| MSRA       | -0.08666 |
| AC139530.1 | -0.08669 |
| SHANK3     | -0.08672 |
| PEA15      | -0.08676 |
| PTPN18     | -0.08676 |
| MTMR1      | -0.08678 |
| NARF       | -0.08681 |
| GUCY1B1    | -0.08686 |
| AKAP8L     | -0.08691 |
| AC129507.3 | -0.08691 |
| KANSL1     | -0.08696 |
| CAMK1      | -0.08703 |
| AC026355.2 | -0.08704 |
| PLEKHA7    | -0.08706 |
| FRMD3      | -0.08708 |
| NUDT19     | -0.08709 |
| POGLUT1    | -0.08711 |
| ELMO2      | -0.08724 |
| SNX11      | -0.08726 |
| SPIDR      | -0.08727 |
| PI4KA      | -0.08735 |
| CCDC68     | -0.08739 |
| STX16      | -0.08741 |

|            |          |
|------------|----------|
| SAFB2      | -0.08741 |
| ZNF507     | -0.08742 |
| VRK1       | -0.08745 |
| LMBRD1     | -0.08748 |
| AC008393.1 | -0.08766 |
| AC022415.1 | -0.08778 |
| TENT4B     | -0.08778 |
| SATB1      | -0.08785 |
| AC002075.2 | -0.08787 |
| BTBD19     | -0.08792 |
| AMD1       | -0.08795 |
| ZBTB21     | -0.08796 |
| DCAF15     | -0.08797 |
| AKAP8      | -0.08798 |
| PELATON    | -0.088   |
| AC131009.3 | -0.0881  |
| ANAPC1P2   | -0.0881  |
| PIN1       | -0.08814 |
| PHKA2      | -0.08825 |
| ADPRHL1    | -0.08825 |
| RAD51D     | -0.08825 |
| ZNF133     | -0.08827 |
| IPO4       | -0.08828 |
| LBH        | -0.08829 |
| SOX17      | -0.08834 |
| UGDH-AS1   | -0.08835 |
| SLC26A11   | -0.08835 |
| NMRK1      | -0.08836 |
| LYRM2      | -0.08845 |
| NSMCE2     | -0.08851 |
| HEXIM2     | -0.08852 |
| WASH2P     | -0.08856 |
| ZNF480     | -0.08856 |
| IL6R       | -0.08862 |
| ERCC4      | -0.08864 |
| GPR35      | -0.0887  |
| SGSM3      | -0.08872 |
| AC011442.1 | -0.08873 |
| KIZ        | -0.08877 |
| OAS1       | -0.08879 |
| ANKRD13D   | -0.0888  |
| BRWD1      | -0.08883 |
| NIFK-AS1   | -0.08884 |
| HSDL1      | -0.08888 |
| NINL       | -0.08891 |
| ALG5       | -0.08894 |
| ZNF585A    | -0.08901 |
| ATP6V1C1   | -0.08906 |
| CCDC167    | -0.08907 |

|            |          |
|------------|----------|
| TRIM5      | -0.08916 |
| SAT2       | -0.08917 |
| ZEB1       | -0.08921 |
| TNFRSF10A  | -0.08924 |
| FBXL6      | -0.08925 |
| AC024940.2 | -0.08929 |
| AL158212.3 | -0.0893  |
| DDX58      | -0.0893  |
| CDIP1      | -0.08932 |
| C12orf73   | -0.08932 |
| GALNT6     | -0.08936 |
| NUB1       | -0.08938 |
| MAP3K5     | -0.08942 |
| FAM229A    | -0.08944 |
| ARID4B     | -0.08946 |
| ARHGAP8    | -0.08949 |
| IRGQ       | -0.08956 |
| TFDP2      | -0.08956 |
| TRAF6      | -0.0896  |
| AC036176.1 | -0.08967 |
| ZNF70      | -0.08969 |
| SMIM29     | -0.08969 |
| SIRT1      | -0.0897  |
| MBNL1-AS1  | -0.08972 |
| DCAF11     | -0.08977 |
| MIR499A    | -0.08979 |
| UQCRB      | -0.08982 |
| AC068580.1 | -0.08986 |
| DNASE1     | -0.08991 |
| AC097359.2 | -0.08992 |
| RALGAPA2   | -0.08993 |
| MAP3K2-DT  | -0.08995 |
| SF3B1      | -0.09001 |
| ADAMTS13   | -0.09004 |
| MANF       | -0.09008 |
| AC236972.3 | -0.09009 |
| AL513165.1 | -0.0901  |
| AC010809.1 | -0.09011 |
| AC016747.1 | -0.09011 |
| DOK1       | -0.09014 |
| DLEU1      | -0.09016 |
| ACBD4      | -0.09019 |
| ZNF155     | -0.09029 |
| ALKBH1     | -0.09034 |
| CASP8AP2   | -0.09039 |
| MED30      | -0.09041 |
| ANKZF1     | -0.09047 |
| SNCA       | -0.09052 |
| AC011944.1 | -0.09053 |



|            |          |
|------------|----------|
| PPP1R12C   | -0.09055 |
| WASH4P     | -0.09058 |
| CDRT15P1   | -0.0906  |
| SHC2       | -0.09061 |
| TAMM41     | -0.09068 |
| SYNGR1     | -0.09068 |
| FXVD6      | -0.09072 |
| RPAIN      | -0.09074 |
| SELENOO    | -0.09074 |
| OPTN       | -0.09076 |
| FBXL5      | -0.09078 |
| LNP1       | -0.09078 |
| AP002748.4 | -0.09079 |
| HEY1       | -0.0908  |
| CCSAP      | -0.0908  |
| AP002387.1 | -0.09083 |
| PEAR1      | -0.09083 |
| TCIM       | -0.09087 |
| C2orf74    | -0.09098 |
| HMG2P46    | -0.09102 |
| B9D2       | -0.09102 |
| ZFP82      | -0.09111 |
| SMC6       | -0.09111 |
| AC084036.1 | -0.09113 |
| ADGRL4     | -0.09116 |
| GNA13      | -0.09118 |
| TUBA1A     | -0.09118 |
| CDC37L1    | -0.09124 |
| TNS3       | -0.09126 |
| VAMP8      | -0.09127 |
| ST6GALNAC3 | -0.09127 |
| ZNF776     | -0.09128 |
| TMTC2      | -0.09138 |
| ARL6IP5    | -0.09145 |
| EXD2       | -0.09145 |
| GSTM1      | -0.09146 |
| STAG1      | -0.09161 |
| AL132822.1 | -0.09161 |
| EVA1A      | -0.09162 |
| VN1R1      | -0.09171 |
| DPP4       | -0.09175 |
| DNAJC6     | -0.09175 |
| NMT2       | -0.09177 |
| TTC5       | -0.09178 |
| LINC01806  | -0.0918  |
| NUDT18     | -0.09182 |
| DACT2      | -0.09187 |
| THAP9      | -0.09189 |
| NUDT2      | -0.09193 |

|             |          |
|-------------|----------|
| VPS29       | -0.09194 |
| ZUP1        | -0.09197 |
| ZNF654      | -0.09197 |
| RNY3P16     | -0.09199 |
| AC092171.5  | -0.09202 |
| SH3BP2      | -0.09205 |
| AKR7A3      | -0.09212 |
| ANKRD27     | -0.09212 |
| DOC2B       | -0.09215 |
| GLIS2-AS1   | -0.09218 |
| GBGT1       | -0.09222 |
| ARMCX4      | -0.09223 |
| CLUAP1      | -0.09226 |
| STAU2       | -0.09228 |
| OSBPL1A     | -0.09234 |
| SECISBP2    | -0.09236 |
| MCOLN1      | -0.09238 |
| ZNF765      | -0.09238 |
| IRF3        | -0.09239 |
| AC016866.1  | -0.09239 |
| POLG2       | -0.0924  |
| ZNF596      | -0.0924  |
| DCDC2       | -0.0924  |
| PDE7B       | -0.09248 |
| OPRL1       | -0.09249 |
| TFPT        | -0.09252 |
| PRDM6       | -0.09261 |
| KLK14       | -0.09263 |
| GEMIN8      | -0.09266 |
| MRE11       | -0.09267 |
| ZNF608      | -0.09268 |
| GSTM4       | -0.0927  |
| L3HYPDH     | -0.09271 |
| CMC1        | -0.09279 |
| AC009403.1  | -0.0928  |
| TRPM7       | -0.09281 |
| MAN2C1      | -0.09284 |
| PHTF2       | -0.09286 |
| GPR75       | -0.09288 |
| SLC30A4     | -0.0929  |
| PPP2R3B     | -0.09293 |
| ALG9        | -0.09297 |
| PDSS2       | -0.09298 |
| AC100814.1  | -0.09299 |
| PTTG1       | -0.093   |
| C6orf223    | -0.09305 |
| FAM160A1-DT | -0.09311 |
| ASNS        | -0.09316 |
| FMO1        | -0.09318 |

|            |          |
|------------|----------|
| ZNF213-AS1 | -0.09322 |
| ZNF587B    | -0.09323 |
| CABP4      | -0.09323 |
| KRI1       | -0.09324 |
| ST3GAL2    | -0.09329 |
| CPS1       | -0.0933  |
| ANKRA2     | -0.09336 |
| DHRS4      | -0.09338 |
| HSD17B14   | -0.09338 |
| FAM172A    | -0.0934  |
| ST3GAL5    | -0.09341 |
| NGLY1      | -0.09344 |
| CLDN10-AS1 | -0.09347 |
| DUSP10     | -0.0935  |
| TMED5      | -0.09352 |
| Z69706.1   | -0.09355 |
| ISCA2      | -0.09357 |
| INTS10     | -0.09358 |
| RPL21P75   | -0.09359 |
| C2CD5      | -0.0936  |
| YTHDF3-AS1 | -0.09363 |
| ZNF619     | -0.09363 |
| ERCC5      | -0.09366 |
| KTN1       | -0.09368 |
| AC011451.1 | -0.09376 |
| PPP4R3A    | -0.09376 |
| TINF2      | -0.09382 |
| RBIS       | -0.09386 |
| SYVN1      | -0.09387 |
| ENPP4      | -0.09387 |
| HMGB2      | -0.09388 |
| ZFP62      | -0.09388 |
| CFAP58-DT  | -0.09389 |
| AC254633.1 | -0.09389 |
| IFNGR2     | -0.09397 |
| SALL4      | -0.094   |
| WSB1       | -0.09401 |
| NR2C1      | -0.09403 |
| AHI1       | -0.09405 |
| DYRK3      | -0.09407 |
| ARHGAP17   | -0.09407 |
| TMEM47     | -0.09409 |
| YJU2       | -0.09413 |
| HDHD2      | -0.09415 |
| AL357033.4 | -0.09417 |
| UBE2W      | -0.09421 |
| TTLL5      | -0.09422 |
| GALNT17    | -0.09425 |
| POLR2K     | -0.09427 |

|            |          |
|------------|----------|
| PPP1R9B    | -0.09428 |
| FAM76A     | -0.09429 |
| ROCK1      | -0.09443 |
| ODF3L1     | -0.09445 |
| HIKESHIP2  | -0.09449 |
| PIK3C2A    | -0.0945  |
| CLASP2     | -0.09454 |
| ZNF812P    | -0.09454 |
| GABPA      | -0.09458 |
| RGS10      | -0.09459 |
| CD82       | -0.09461 |
| UNC5CL     | -0.0947  |
| LINC01767  | -0.09483 |
| ARNTL      | -0.09483 |
| SQLE       | -0.09484 |
| STX4       | -0.09485 |
| LOH12CR2   | -0.09486 |
| ZNF862     | -0.09487 |
| LIPT1      | -0.09488 |
| AP006621.3 | -0.09494 |
| ACOT1      | -0.09495 |
| PLEKHA4    | -0.09496 |
| FBXL2      | -0.09497 |
| OSBPL11    | -0.09499 |
| PIP4P2     | -0.09501 |
| MARK3      | -0.09515 |
| AC004877.2 | -0.09521 |
| ZDHHC11    | -0.09523 |
| CEP57L1    | -0.09523 |
| APPL2      | -0.09525 |
| ZNF121     | -0.09526 |
| PLPP6      | -0.09529 |
| MTSS1      | -0.09533 |
| TARBP1     | -0.09534 |
| AL132657.1 | -0.0954  |
| TCEAL3     | -0.09542 |
| LRRFIP1P1  | -0.09547 |
| NXF1       | -0.09549 |
| AC120036.3 | -0.09558 |
| DNAJB14    | -0.09559 |
| RELB       | -0.0956  |
| NBL1       | -0.09563 |
| BORCS8     | -0.09568 |
| ZNF749     | -0.09572 |
| PCMTD1     | -0.09579 |
| LINC01184  | -0.0958  |
| MTCP1      | -0.09583 |
| TMEM71     | -0.09587 |
| LYSMD3     | -0.09587 |

|            |          |
|------------|----------|
| SYNPR-AS1  | -0.09588 |
| TMEM98     | -0.09588 |
| AL135925.1 | -0.0959  |
| MTUS1      | -0.09591 |
| LINC02609  | -0.09598 |
| CD27-AS1   | -0.09599 |
| LINC00676  | -0.09604 |
| MAP3K2     | -0.09607 |
| DPP7       | -0.09608 |
| AGAP9      | -0.09609 |
| POU2F1     | -0.0961  |
| AC000123.2 | -0.09621 |
| SEPHS2     | -0.09621 |
| NINJ2-AS1  | -0.09624 |
| MBTD1      | -0.09624 |
| AC091271.1 | -0.09627 |
| NMNAT3     | -0.0963  |
| DPYSL2     | -0.09631 |
| MT-ND2     | -0.09631 |
| TBRG1      | -0.09634 |
| FUNDC2P1   | -0.09641 |
| AK3        | -0.09642 |
| ZSCAN12    | -0.09645 |
| KIF9       | -0.09652 |
| FUT2       | -0.09657 |
| LINC01138  | -0.09659 |
| GAPVD1     | -0.0966  |
| ZNF423     | -0.09661 |
| ZNF252P    | -0.09662 |
| FAXC       | -0.09663 |
| CGGBP1     | -0.09664 |
| OLR1       | -0.09667 |
| ZNF433     | -0.0967  |
| GBA2       | -0.09673 |
| WDR47      | -0.09682 |
| ZNF512     | -0.09683 |
| MTO1       | -0.09685 |
| NATD1      | -0.09685 |
| DEPDC5     | -0.09686 |
| AC004264.1 | -0.09687 |
| TRAF3IP1   | -0.09691 |
| ZFYVE16    | -0.09694 |
| MOSPD2     | -0.09696 |
| GABPB2     | -0.09697 |
| JKAMP      | -0.09705 |
| PGBD4      | -0.09716 |
| NHSL1      | -0.09718 |
| RYBP       | -0.09718 |
| EAPP       | -0.09719 |

|            |          |
|------------|----------|
| TRIM44     | -0.0972  |
| C4BPA      | -0.09721 |
| L3MBTL1    | -0.09729 |
| MOCS1      | -0.09729 |
| NFE2L2     | -0.09736 |
| HARBI1     | -0.09737 |
| ZNF22      | -0.09742 |
| HMGB3      | -0.09745 |
| MTMR3      | -0.0975  |
| NINJ2      | -0.09754 |
| PRKG2      | -0.09756 |
| QRICH2     | -0.09758 |
| SNTB2      | -0.09765 |
| TMC6       | -0.09769 |
| SH3TC1     | -0.09769 |
| AL033519.4 | -0.09771 |
| MOB1A      | -0.09774 |
| NRGN       | -0.09784 |
| TYW5       | -0.09785 |
| DYM        | -0.09791 |
| CHRNA5     | -0.09796 |
| TYMSOS     | -0.09801 |
| SNAPC4     | -0.09807 |
| PLAAT3     | -0.09812 |
| PRX        | -0.09825 |
| MRPL52     | -0.0983  |
| SYCP2      | -0.09838 |
| VPS37C     | -0.0984  |
| ELF1       | -0.09841 |
| LINC01023  | -0.09842 |
| CLCN6      | -0.09845 |
| DNMT1      | -0.09849 |
| IER3IP1    | -0.0985  |
| IFT81      | -0.0985  |
| MTERF4     | -0.0985  |
| SIX4       | -0.09851 |
| TIMM21     | -0.09851 |
| UBA52P5    | -0.09857 |
| CHCHD7     | -0.09858 |
| ARSB       | -0.09859 |
| CTAG2      | -0.09862 |
| DDX3Y      | -0.09863 |
| AC021028.1 | -0.09868 |
| AC098484.1 | -0.09871 |
| SPATA25    | -0.09871 |
| CD93       | -0.09874 |
| AC090543.2 | -0.09885 |
| ZBTB49     | -0.09886 |
| ERMARD     | -0.09896 |

|             |          |
|-------------|----------|
| EED         | -0.09898 |
| TDRD3       | -0.09901 |
| AP000254.2  | -0.09906 |
| LINC00839   | -0.09919 |
| ZSWIM3      | -0.0992  |
| PEAK1       | -0.09927 |
| AL117332.1  | -0.09932 |
| CDK10       | -0.0994  |
| CCDC61      | -0.09948 |
| ABO         | -0.09951 |
| NAPA-AS1    | -0.09951 |
| KCNF1       | -0.09955 |
| DAGLA       | -0.09962 |
| PRKD2       | -0.09964 |
| DCN         | -0.09967 |
| EGOT        | -0.0997  |
| ORC6        | -0.09971 |
| ZNF562      | -0.09972 |
| KDM4A-AS1   | -0.09974 |
| BMP8B       | -0.09975 |
| ARHGEF39    | -0.09978 |
| COX4I1      | -0.09985 |
| LGALS8      | -0.09986 |
| AL645939.3  | -0.09987 |
| HADH        | -0.09988 |
| AC138207.3  | -0.09989 |
| CEP95       | -0.09989 |
| PPP1R3B     | -0.09997 |
| MIR4458HG   | -0.09998 |
| WDR37       | -0.09999 |
| HDX         | -0.1     |
| COMMD7      | -0.10001 |
| TOX         | -0.10003 |
| AC137932.3  | -0.10005 |
| GXYLT2      | -0.10007 |
| MFSD14C     | -0.1001  |
| BCAS4       | -0.10011 |
| SEC22C      | -0.10012 |
| KCNQ5       | -0.10016 |
| C5AR1       | -0.10024 |
| JMJD1C-AS1  | -0.10024 |
| HNRNPDL     | -0.10029 |
| RNASEH1-AS1 | -0.10032 |
| TANGO6      | -0.10032 |
| SSBP4       | -0.10039 |
| SIX1        | -0.1004  |
| APOO        | -0.10044 |
| MSL1        | -0.10046 |
| AC018809.2  | -0.10052 |

|            |          |
|------------|----------|
| PDP1       | -0.10057 |
| SS18L2     | -0.10062 |
| FPR2       | -0.10065 |
| MTHFD2     | -0.10066 |
| XYLT1      | -0.10071 |
| WDR62      | -0.10072 |
| IMMP1L     | -0.10073 |
| CEP63      | -0.10076 |
| TMEM61     | -0.10077 |
| ZNF317     | -0.10078 |
| ZNF549     | -0.10081 |
| MT-CO3     | -0.10081 |
| SLC35E2A   | -0.10082 |
| DEPTOR     | -0.10083 |
| INPP5B     | -0.10083 |
| PDK3       | -0.10083 |
| ZNF783     | -0.10092 |
| SPTLC2     | -0.10093 |
| TMSB4Y     | -0.10098 |
| MOB3A      | -0.10102 |
| MRPL13     | -0.10106 |
| ABLIM2     | -0.1011  |
| TMEM161B   | -0.10112 |
| HPD        | -0.10115 |
| FUS        | -0.1012  |
| CYB5RL     | -0.10122 |
| LINC01671  | -0.10129 |
| TRAPPC2    | -0.1013  |
| GRAMD1C    | -0.10134 |
| ATXN1      | -0.10135 |
| OSTF1      | -0.10136 |
| PLAGL1     | -0.10138 |
| SLC27A2    | -0.10143 |
| ZNF264     | -0.10146 |
| IDS        | -0.1015  |
| C12orf4    | -0.10155 |
| PABPC1L    | -0.10158 |
| ALOX15B    | -0.10159 |
| AP003486.1 | -0.10166 |
| MLLT10     | -0.10167 |
| RPL21      | -0.10173 |
| AL133367.1 | -0.10174 |
| SMYD3      | -0.10177 |
| ZNF287     | -0.10178 |
| PTPRJ      | -0.1018  |
| SNAPC3     | -0.10184 |
| TPGS1      | -0.10184 |
| DTX3L      | -0.10185 |
| BAX        | -0.10185 |



|            |          |
|------------|----------|
| DTWD2      | -0.10186 |
| MRPS25     | -0.10194 |
| R3HCC1L    | -0.10194 |
| CYP2R1     | -0.10199 |
| TTC33      | -0.10201 |
| SLC25A36   | -0.10203 |
| CRY1       | -0.10205 |
| ADAMTSL2   | -0.10217 |
| GLUD2      | -0.10222 |
| WNT3A      | -0.10224 |
| MR1        | -0.10225 |
| F13A1      | -0.10228 |
| KCNMB1     | -0.10239 |
| AC000123.1 | -0.10239 |
| FAM122A    | -0.10253 |
| LRRC27     | -0.10263 |
| AP000866.4 | -0.10264 |
| ADPRM      | -0.10267 |
| SYT17      | -0.1027  |
| AC090425.2 | -0.10271 |
| RBL2       | -0.10275 |
| CRY2       | -0.10276 |
| AC034243.1 | -0.10279 |
| TTC8       | -0.10281 |
| CSRNP1     | -0.10285 |
| DMAC1      | -0.10286 |
| CDKL2      | -0.10287 |
| NEK1       | -0.10296 |
| ATOX1      | -0.10302 |
| PER1       | -0.10307 |
| FAM227B    | -0.10309 |
| CIRBP-AS1  | -0.1031  |
| IFT43      | -0.10313 |
| ZNF624     | -0.10314 |
| ZMAT3      | -0.10331 |
| AL139099.3 | -0.10331 |
| ASB16-AS1  | -0.10333 |
| AC011462.4 | -0.10335 |
| LBR        | -0.10338 |
| RANBP10    | -0.10341 |
| TRIQK      | -0.10342 |
| VWA7       | -0.10343 |
| NEK3       | -0.10357 |
| CLDN5      | -0.10358 |
| Z98884.2   | -0.10359 |
| ADCK5      | -0.10361 |
| ST7-AS1    | -0.10361 |
| MED13      | -0.10367 |
| NBN        | -0.10368 |

|            |          |
|------------|----------|
| IFNGR1     | -0.1037  |
| MIOS-DT    | -0.10376 |
| TMEM8B     | -0.10379 |
| PHOSPHO2   | -0.10384 |
| PRR15L     | -0.10386 |
| NHLRC3     | -0.1039  |
| RSBN1      | -0.10393 |
| PRR14      | -0.10398 |
| PHTF1      | -0.104   |
| LRRCC1     | -0.10402 |
| AC002091.2 | -0.10407 |
| SCYL3      | -0.10408 |
| AP1B1      | -0.10409 |
| UBAC1      | -0.10412 |
| AC040970.1 | -0.10413 |
| BST2       | -0.10414 |
| SPIN3      | -0.10416 |
| ZFP2       | -0.10417 |
| TMEM108    | -0.10421 |
| PPIAP39    | -0.10429 |
| RBMS3      | -0.1043  |
| KDM5D      | -0.10433 |
| ANKRD16    | -0.10434 |
| RPS10P5    | -0.10436 |
| AC006042.1 | -0.10441 |
| CEP290     | -0.10449 |
| CAPN8      | -0.10453 |
| ZNF33A     | -0.10455 |
| ARID2      | -0.10457 |
| CEBPA-DT   | -0.10462 |
| C1orf21    | -0.10479 |
| AC004839.1 | -0.10481 |
| TMEM198B   | -0.10484 |
| SNORD104   | -0.10485 |
| AC105389.2 | -0.10493 |
| DDX60L     | -0.10495 |
| AL592148.3 | -0.105   |
| DDX19B     | -0.1051  |
| LOXL3      | -0.10514 |
| SLC7A8     | -0.10515 |
| CBWD2      | -0.10515 |
| KHNYN      | -0.10518 |
| LMNTD2-AS1 | -0.10526 |
| CNR1       | -0.10528 |
| RBMS1P1    | -0.10537 |
| IFT140     | -0.10538 |
| RO60       | -0.10539 |
| MED13L     | -0.10541 |
| PHLPP2     | -0.10542 |

|              |          |
|--------------|----------|
| RPL23AP53    | -0.10544 |
| DUSP18       | -0.10546 |
| GADD45B      | -0.10554 |
| MRPL54       | -0.10556 |
| FPR1         | -0.10561 |
| SLC18B1      | -0.10566 |
| ARHGEF26-AS1 | -0.1057  |
| EMC2         | -0.10575 |
| LRMDA        | -0.10578 |
| CEP89        | -0.10579 |
| RNF13        | -0.10581 |
| AC037487.3   | -0.10587 |
| ENOSF1       | -0.10591 |
| LRRC75A      | -0.10594 |
| AC009093.3   | -0.10595 |
| EPOR         | -0.10599 |
| CDK17        | -0.106   |
| PHACTR1      | -0.106   |
| VAC14        | -0.10602 |
| AC034236.2   | -0.10602 |
| LITAF        | -0.10602 |
| AC022211.3   | -0.10605 |
| RPS2P32      | -0.10624 |
| LINC02481    | -0.10625 |
| CELF1        | -0.10625 |
| ABCD4        | -0.10628 |
| PEX3         | -0.10628 |
| MST1P2       | -0.10635 |
| ZNF335       | -0.10638 |
| RN7SKP239    | -0.10639 |
| AC004803.1   | -0.10641 |
| AC105219.3   | -0.10642 |
| CCNT2        | -0.10643 |
| NXT1         | -0.10646 |
| RBPJ         | -0.10651 |
| RTRAF        | -0.10654 |
| LINC02210    | -0.10656 |
| FAHD2A       | -0.10659 |
| PDZD2        | -0.10659 |
| FAM120C      | -0.1066  |
| RNASE1       | -0.10661 |
| AC004540.1   | -0.10662 |
| EFR3A        | -0.10662 |
| TBC1D17      | -0.10667 |
| CCDC50       | -0.10668 |
| AL603839.3   | -0.10669 |
| ELL          | -0.10669 |
| ZNF707       | -0.1067  |
| INTS9        | -0.10671 |

|            |          |
|------------|----------|
| SIPA1      | -0.10685 |
| SLC35F5    | -0.10687 |
| COL25A1    | -0.10689 |
| PIGN       | -0.10692 |
| B4GALNT3   | -0.10697 |
| DNAJA4     | -0.10698 |
| MON2       | -0.10699 |
| AC016065.1 | -0.10703 |
| KIAA1109   | -0.10703 |
| KANSL3     | -0.10704 |
| TTLL11     | -0.10713 |
| MYG1-AS1   | -0.10714 |
| PDE8B      | -0.10732 |
| SLC29A3    | -0.10732 |
| XPO4       | -0.10736 |
| PUS7L      | -0.10741 |
| JUND       | -0.10743 |
| PBLD       | -0.10743 |
| ZNF599     | -0.10744 |
| AC025165.5 | -0.10745 |
| AL391834.2 | -0.10745 |
| ZNF717     | -0.10747 |
| MLYCD      | -0.1075  |
| AC118553.1 | -0.10753 |
| EEF2K      | -0.10757 |
| RB1        | -0.1076  |
| PRDM5      | -0.10764 |
| ZNF17      | -0.10766 |
| AC004232.2 | -0.1077  |
| AC068580.3 | -0.10771 |
| SARNP      | -0.10774 |
| SAPCD1-AS1 | -0.10776 |
| LRBA       | -0.10777 |
| AC106820.3 | -0.10779 |
| AC073857.1 | -0.10789 |
| KAZN       | -0.10791 |
| SLC43A3    | -0.10791 |
| RC3H2      | -0.10791 |
| RNPC3      | -0.10798 |
| CAMK1D     | -0.10801 |
| AGO3       | -0.10802 |
| AL606834.1 | -0.10812 |
| SLC2A8     | -0.10824 |
| RPRD1A     | -0.1083  |
| AC092070.2 | -0.10831 |
| ADGRF1     | -0.10832 |
| AP006621.5 | -0.10838 |
| ANK3       | -0.1084  |
| RABGGTB    | -0.10847 |

|            |          |
|------------|----------|
| AC106782.5 | -0.1085  |
| LILRA5     | -0.10851 |
| TRAPPC13   | -0.10852 |
| AC139100.2 | -0.10852 |
| AC004923.1 | -0.10856 |
| RBL1       | -0.10857 |
| RNU6-516P  | -0.1086  |
| PCBP3      | -0.10864 |
| MARCHF3    | -0.10868 |
| ENKD1      | -0.10868 |
| GAS2L3     | -0.1087  |
| SIGIRR     | -0.10873 |
| AC004975.1 | -0.10882 |
| PDIK1L     | -0.10885 |
| PTBP2      | -0.10887 |
| DOCK9      | -0.10887 |
| MT-CYB     | -0.10887 |
| REV1       | -0.10891 |
| KMT2A      | -0.10896 |
| SCUBE3     | -0.10901 |
| CIAO2A     | -0.10902 |
| RPSAP9     | -0.10903 |
| TOLLIP-AS1 | -0.10904 |
| CCT6B      | -0.10909 |
| MTMR14     | -0.10909 |
| MECP2      | -0.1091  |
| AL078581.1 | -0.10911 |
| AC120053.1 | -0.10911 |
| RNF227     | -0.10912 |
| ZBED3      | -0.10913 |
| PNN        | -0.10914 |
| ZNF444     | -0.10916 |
| STX2       | -0.10916 |
| PSENEN     | -0.10918 |
| SLC28A3    | -0.10922 |
| INTU       | -0.10923 |
| TGM2       | -0.10924 |
| AMDHD2     | -0.10925 |
| ANAPC2     | -0.10926 |
| HSF4       | -0.10929 |
| ABCA11P    | -0.1093  |
| RBM26      | -0.10931 |
| JHY        | -0.10935 |
| CAPN10     | -0.10936 |
| SELENOS    | -0.10944 |
| OSBPL8     | -0.1095  |
| SLC25A51   | -0.10953 |
| OAT        | -0.10956 |
| HSPA4L     | -0.10957 |

|            |          |
|------------|----------|
| AL359921.2 | -0.10964 |
| LINC01232  | -0.10965 |
| PI4KAP2    | -0.10968 |
| SLC9B2     | -0.10976 |
| AL445250.1 | -0.10976 |
| ZNF527     | -0.10982 |
| ZNF473     | -0.10983 |
| HIPK3      | -0.10983 |
| CLUL1      | -0.10985 |
| GLTPD2     | -0.10985 |
| ZNF137P    | -0.1099  |
| DNAJC22    | -0.10997 |
| EFCAB15P   | -0.10998 |
| BBS9       | -0.11001 |
| TRAK2      | -0.11002 |
| USP27X-AS1 | -0.1101  |
| EML3       | -0.11011 |
| RPSAP53    | -0.11012 |
| RGS14      | -0.11014 |
| AL513218.1 | -0.11015 |
| RFXAP      | -0.11017 |
| XRRA1      | -0.11029 |
| AC104819.3 | -0.11033 |
| SPRN       | -0.11037 |
| KDM7A-DT   | -0.11042 |
| PAMR1      | -0.11042 |
| VPS13D     | -0.11045 |
| TNRC6A     | -0.11045 |
| DHRS4L2    | -0.11047 |
| NSUN6      | -0.11053 |
| EDRF1      | -0.11053 |
| AC073389.1 | -0.11056 |
| TAF1       | -0.11058 |
| SPTSSA     | -0.11059 |
| MARF1      | -0.1106  |
| CAPNS2     | -0.11061 |
| KLHL24     | -0.11064 |
| NDOR1      | -0.11065 |
| HMGN3      | -0.11075 |
| TTC31      | -0.11079 |
| TEPSIN     | -0.11084 |
| DDX39B     | -0.11089 |
| CNTN6      | -0.1109  |
| AL049840.4 | -0.11101 |
| PIGH       | -0.11104 |
| RTN4IP1    | -0.11107 |
| ORM2       | -0.11112 |
| MICE       | -0.11113 |
| GALNT14    | -0.11113 |

|              |          |
|--------------|----------|
| TBX2         | -0.11115 |
| PPP1R21      | -0.11118 |
| AC046143.2   | -0.11118 |
| AC073046.1   | -0.11112 |
| RPS4XP6      | -0.11112 |
| PFKFB2       | -0.11112 |
| AC002091.1   | -0.11122 |
| USP37        | -0.11124 |
| OFD1         | -0.11127 |
| ZNF510       | -0.11127 |
| ZNF32        | -0.11135 |
| SAP30L       | -0.11141 |
| SS18         | -0.11152 |
| PPM1D        | -0.11155 |
| NT5C3A       | -0.11159 |
| COX7B        | -0.11116 |
| ZNF815P      | -0.11116 |
| YBX2         | -0.11161 |
| MORN2        | -0.11165 |
| CFAP36       | -0.11169 |
| DICER1       | -0.11117 |
| NEK8         | -0.11117 |
| PLCB4        | -0.11171 |
| LINC01770    | -0.11174 |
| MAP3K3       | -0.11181 |
| PAXBP1       | -0.11186 |
| KIAA1671-AS1 | -0.11186 |
| MARCHF8      | -0.11187 |
| LUC7L3       | -0.11188 |
| AC113935.1   | -0.11193 |
| AC091849.2   | -0.11195 |
| NDUFA1       | -0.11199 |
| ZBED2        | -0.112   |
| GGCX         | -0.11207 |
| ZNF678       | -0.11211 |
| ZNF85        | -0.11212 |
| PCDHB15      | -0.11219 |
| AC007342.4   | -0.1122  |
| CNST         | -0.1122  |
| FAM222A      | -0.11221 |
| DDTL         | -0.11225 |
| SENP6        | -0.11226 |
| GNE          | -0.11228 |
| SLC15A2      | -0.1123  |
| CTSO         | -0.1123  |
| NR2F1        | -0.1124  |
| ZNF780A      | -0.11242 |
| SLC24A3      | -0.11245 |
| ZNF566       | -0.11248 |

|            |          |
|------------|----------|
| CNRIP1     | -0.11249 |
| STIM2-AS1  | -0.11254 |
| TMEM106A   | -0.1126  |
| IGKV1D-42  | -0.11263 |
| MTM1       | -0.11264 |
| NDUFAF5    | -0.11265 |
| DCAF10     | -0.1127  |
| KLHL36     | -0.11275 |
| THCAT158   | -0.11276 |
| ZNF839     | -0.11279 |
| GAB1       | -0.11281 |
| MGAT5      | -0.11286 |
| PDGFRA     | -0.1129  |
| SGIP1      | -0.11292 |
| FBXO6      | -0.11298 |
| TMEM138    | -0.11303 |
| SLC38A1    | -0.11304 |
| MTG1       | -0.11309 |
| IQCK       | -0.11322 |
| PIGA       | -0.11327 |
| BCL2L11    | -0.11328 |
| ARRDC1-AS1 | -0.1133  |
| ABCA12     | -0.1134  |
| RGS19      | -0.1134  |
| CD302      | -0.11342 |
| IFNAR1     | -0.11344 |
| SGF29      | -0.11352 |
| CHORDC1    | -0.11358 |
| LHFPL2     | -0.1136  |
| CEP135     | -0.11361 |
| ABCA7      | -0.11375 |
| KRBOX4     | -0.11377 |
| GRK2       | -0.11377 |
| AC022150.2 | -0.11378 |
| AC126474.2 | -0.11385 |
| ARID5B     | -0.11386 |
| MRPS31     | -0.11388 |
| ANKRD54    | -0.11393 |
| AC015813.1 | -0.11396 |
| TESK2      | -0.11404 |
| AQP5       | -0.11414 |
| ZNF419     | -0.11414 |
| RMDN2      | -0.11416 |
| LINC01881  | -0.11417 |
| AC093726.1 | -0.11419 |
| WDR19      | -0.11427 |
| ARSG       | -0.11433 |
| KLHL9      | -0.11433 |
| ARHGEF25   | -0.11434 |



|            |          |
|------------|----------|
| TMEM205    | -0.11436 |
| SBF2       | -0.11442 |
| NDUFB1     | -0.11447 |
| PRRT3      | -0.1145  |
| DTNBP1     | -0.1145  |
| DUS2       | -0.11452 |
| DDIT3      | -0.11453 |
| TRIM14     | -0.11453 |
| AP003390.1 | -0.11459 |
| AC139887.1 | -0.11464 |
| RNASEK     | -0.11471 |
| SYT1       | -0.11472 |
| FRY        | -0.11474 |
| DDR2       | -0.11476 |
| COL13A1    | -0.11482 |
| TAPBP      | -0.11488 |
| HIC1       | -0.11491 |
| AP000866.2 | -0.11495 |
| RPS20P33   | -0.11499 |
| TNFRSF10C  | -0.11503 |
| LBX2-AS1   | -0.11506 |
| ZNF652     | -0.1151  |
| ZNF132     | -0.11514 |
| CSKMT      | -0.11515 |
| USP9Y      | -0.11518 |
| MAP4K5     | -0.11521 |
| HOXB6      | -0.11521 |
| ABCB10     | -0.11526 |
| RNGTT      | -0.1153  |
| BRDT       | -0.11534 |
| WDR31      | -0.11537 |
| PARAL1     | -0.11539 |
| SLC14A2    | -0.1154  |
| WIP1       | -0.11542 |
| KANK1      | -0.11542 |
| FAM216A    | -0.11545 |
| CNDP2      | -0.11545 |
| NFX1       | -0.11549 |
| NCF2       | -0.11551 |
| FAM189A2   | -0.11555 |
| ANKRD6     | -0.11556 |
| LZTFL1     | -0.1156  |
| HPGDS      | -0.11561 |
| PCSK7      | -0.11566 |
| ZNF721     | -0.11568 |
| AC003965.2 | -0.11573 |
| AL360181.2 | -0.11576 |
| ABLIM1     | -0.11588 |
| MIR25      | -0.11589 |

|            |          |
|------------|----------|
| PHF7       | -0.11591 |
| AC100861.1 | -0.11592 |
| GUSBP1     | -0.11596 |
| RPL23P2    | -0.11596 |
| TAF1C      | -0.11599 |
| PGBD5      | -0.11601 |
| ALG13      | -0.11602 |
| WDR90      | -0.11603 |
| AGO2       | -0.11603 |
| TPRG1      | -0.11607 |
| SPATA20P1  | -0.11613 |
| DPH7       | -0.11622 |
| HSP90B1    | -0.11623 |
| APBB3      | -0.11634 |
| FUZ        | -0.11635 |
| AC024361.1 | -0.11635 |
| THOC1      | -0.11638 |
| RNF207-AS1 | -0.11642 |
| AP000577.1 | -0.11643 |
| E2F2       | -0.11643 |
| AC005083.1 | -0.11648 |
| ACVRL1     | -0.1165  |
| MAGI2      | -0.11654 |
| ABCC4      | -0.11656 |
| EEA1       | -0.11663 |
| FCGR2A     | -0.11675 |
| ZNF34      | -0.11684 |
| SLC9A6     | -0.11684 |
| CTSB       | -0.11685 |
| CLEC14A    | -0.11692 |
| HAUS1      | -0.11692 |
| AC007405.3 | -0.11693 |
| MRPS31P4   | -0.11698 |
| NUAK2      | -0.11709 |
| AC006238.1 | -0.11714 |
| FICD       | -0.1172  |
| ATR        | -0.11724 |
| SDHAF1     | -0.11731 |
| HELZ       | -0.11738 |
| TMEM38B    | -0.11739 |
| PDCD5      | -0.11744 |
| NIPAL2     | -0.1175  |
| PILRB      | -0.11752 |
| FTCDNL1    | -0.11758 |
| AGPAT4     | -0.1176  |
| KLF8       | -0.11761 |
| EXOC6      | -0.11762 |
| ALOX12-AS1 | -0.11762 |
| BMP3       | -0.11763 |

|            |          |
|------------|----------|
| CYP20A1    | -0.11764 |
| TBILA      | -0.11765 |
| RPS6P25    | -0.1177  |
| HS6ST1     | -0.11772 |
| ZCCHC7     | -0.11775 |
| AP003068.1 | -0.11775 |
| BCL6       | -0.11791 |
| RCL1       | -0.11792 |
| NPR2       | -0.11794 |
| CERT1      | -0.11804 |
| TSPAN12    | -0.11809 |
| GEN1       | -0.11812 |
| SLC25A12   | -0.11813 |
| LACTB      | -0.11814 |
| ILKAP      | -0.11815 |
| AC015712.1 | -0.11815 |
| GKAP1      | -0.11819 |
| WASHC2A    | -0.11826 |
| CHKB-DT    | -0.11831 |
| PFKP-DT    | -0.11835 |
| KIAA0513   | -0.11837 |
| MAP9       | -0.11839 |
| BRAF       | -0.11842 |
| DECR1      | -0.11842 |
| WDR25      | -0.11845 |
| CTIF       | -0.11851 |
| UHRF1BP1L  | -0.11853 |
| ADM2       | -0.11854 |
| TRPC1      | -0.11858 |
| CSGALNACT2 | -0.11859 |
| ZNF211     | -0.11866 |
| LINC00663  | -0.11868 |
| AC006449.2 | -0.1187  |
| TMEM30BP1  | -0.11872 |
| LINC02615  | -0.11874 |
| PCTP       | -0.11875 |
| PPP1R3D    | -0.11877 |
| P2RY11     | -0.11879 |
| WASH9P     | -0.1188  |
| FKBP15     | -0.11882 |
| AC002398.1 | -0.11883 |
| AP001830.1 | -0.11889 |
| MIR647     | -0.1189  |
| ZBTB26     | -0.11892 |
| PAXIP1-DT  | -0.11894 |
| AC004069.1 | -0.11901 |
| REX1BD     | -0.11907 |
| CXorf38    | -0.11915 |
| AC138696.2 | -0.11919 |

|            |          |
|------------|----------|
| HOXB3      | -0.11923 |
| PEX2       | -0.11931 |
| FABP6      | -0.11932 |
| PPP1R9A    | -0.11936 |
| PJVK       | -0.11937 |
| SFT2D2     | -0.11937 |
| SLC18A2    | -0.11951 |
| UBE2Q2P1   | -0.11951 |
| AC048382.2 | -0.11952 |
| H2BU1      | -0.11958 |
| HLA-K      | -0.11959 |
| ELF5       | -0.11963 |
| USP34      | -0.11965 |
| TRIM35     | -0.11966 |
| AC090198.1 | -0.11966 |
| GCDH       | -0.11967 |
| AP000240.1 | -0.11968 |
| AKAP6      | -0.11968 |
| THTPA      | -0.11969 |
| ATXN7      | -0.11972 |
| WASHC2C    | -0.11976 |
| RANBP17    | -0.11982 |
| ACTL10     | -0.11983 |
| AC145423.2 | -0.11994 |
| GMFB       | -0.11994 |
| PCSK4      | -0.11996 |
| FZD6       | -0.12003 |
| S100PBP    | -0.12008 |
| ZEB1-AS1   | -0.1201  |
| AC004596.1 | -0.12011 |
| TULP4      | -0.12014 |
| HSPB8      | -0.12017 |
| ZNF280D    | -0.12028 |
| TMEM135    | -0.12029 |
| DENND4B    | -0.12038 |
| ILF3-DT    | -0.12039 |
| PCGF5      | -0.12043 |
| CALHM2     | -0.12066 |
| RHOB       | -0.12072 |
| RNF144B    | -0.12079 |
| PARP12     | -0.1208  |
| JMJD1C     | -0.12082 |
| AC105206.2 | -0.12085 |
| STX19      | -0.12088 |
| RNF31      | -0.12091 |
| ZNF41      | -0.12092 |
| NFIA       | -0.12096 |
| PET100     | -0.12096 |
| LINC00865  | -0.12098 |

|            |          |
|------------|----------|
| ELAC1      | -0.12098 |
| CD274      | -0.12099 |
| ZDHHHC17   | -0.12099 |
| ZNRD2-AS1  | -0.12101 |
| KIAA0930   | -0.12103 |
| DAB2       | -0.12108 |
| ARL13B     | -0.12111 |
| AFF1       | -0.12114 |
| SH3RF3     | -0.12116 |
| ATP11C     | -0.12118 |
| AL365330.1 | -0.12125 |
| INPP5E     | -0.12142 |
| PIIP5K2    | -0.12145 |
| THSD1      | -0.12146 |
| ENHO       | -0.12148 |
| AC141930.1 | -0.12149 |
| BORCS6     | -0.12157 |
| MFSD8      | -0.12159 |
| B9D1       | -0.12168 |
| MYCT1      | -0.12169 |
| LAIR2      | -0.12171 |
| FAAH2      | -0.12172 |
| RNF113A    | -0.12172 |
| FBXO31     | -0.12175 |
| POLK       | -0.12177 |
| AC011498.7 | -0.12182 |
| AC108488.1 | -0.12195 |
| PTPN2      | -0.12196 |
| ZMYM6      | -0.12202 |
| STX7       | -0.12205 |
| SLC16A14   | -0.12205 |
| C14orf132  | -0.12213 |
| YAF2       | -0.12217 |
| PLXDC2     | -0.12221 |
| ORM1       | -0.12233 |
| TTC7B      | -0.12237 |
| PTCSC3     | -0.12238 |
| AC018638.2 | -0.1224  |
| PDLIM1     | -0.12241 |
| ATF7IP     | -0.12241 |
| AC018638.5 | -0.12242 |
| ROBO3      | -0.12258 |
| ARMC9      | -0.12258 |
| LINC00662  | -0.12263 |
| AHCYL2     | -0.12267 |
| ZNF518A    | -0.12268 |
| RASAL1     | -0.12271 |
| CBR4       | -0.12275 |
| AC002470.1 | -0.12282 |

|            |          |
|------------|----------|
| AL391422.4 | -0.12284 |
| ABCG1      | -0.12285 |
| UBE2Q1-AS1 | -0.12295 |
| IFT46      | -0.12299 |
| SEC63P1    | -0.12302 |
| CCDC163    | -0.12302 |
| MMRN2      | -0.12309 |
| CBR3-AS1   | -0.12311 |
| GLI1       | -0.12311 |
| AL031282.2 | -0.12313 |
| GCC2       | -0.1232  |
| AC132872.3 | -0.12321 |
| TMEM63A    | -0.12325 |
| OIT3       | -0.12327 |
| EPC1       | -0.12332 |
| ZNF222     | -0.12332 |
| RAB15      | -0.12343 |
| FAS        | -0.12351 |
| ALDH1A3    | -0.12359 |
| SLC16A11   | -0.1236  |
| CDH5       | -0.12384 |
| ZNF558     | -0.12386 |
| PANK3      | -0.12387 |
| OTULINL    | -0.12402 |
| SLC66A1L   | -0.12402 |
| PHEX       | -0.12409 |
| ISCU       | -0.1242  |
| TIMM9      | -0.12422 |
| AC007342.5 | -0.12422 |
| ZNF438     | -0.12425 |
| MRAP2      | -0.12431 |
| ARHGAP39   | -0.12432 |
| QTRT1      | -0.12444 |
| TIMM10     | -0.1245  |
| LINC02489  | -0.12454 |
| ABHD13     | -0.12463 |
| PLRG1      | -0.12466 |
| AC108673.3 | -0.12467 |
| SVEP1      | -0.12473 |
| MARCO      | -0.12477 |
| SDHAP3     | -0.12478 |
| UBE2V1     | -0.12488 |
| TRAF3      | -0.12489 |
| RIDA       | -0.1249  |
| NAA40      | -0.12491 |
| AC068987.3 | -0.12492 |
| NECAP2     | -0.12492 |
| BBC3       | -0.125   |
| TMX1       | -0.1251  |

|              |          |
|--------------|----------|
| PCNX4        | -0.1251  |
| STXBP4       | -0.12512 |
| AL139287.1   | -0.12519 |
| FAM76B       | -0.12521 |
| AC109322.1   | -0.12527 |
| PGPEP1       | -0.12528 |
| KCNE4        | -0.1253  |
| RN7SL574P    | -0.12535 |
| ERICD        | -0.12542 |
| WDSUB1       | -0.12544 |
| CHMP7        | -0.12546 |
| EXOSC3       | -0.1255  |
| SNRNP70      | -0.12563 |
| ZHX1-C8orf76 | -0.12564 |
| IGHV1-14     | -0.1257  |
| NAT1         | -0.12572 |
| CCDC117      | -0.12576 |
| AC008763.1   | -0.12588 |
| RASL12       | -0.12588 |
| SREK1        | -0.12608 |
| NEK9         | -0.1261  |
| LONRF2       | -0.12613 |
| TPCN2        | -0.12619 |
| MARCHF9      | -0.12622 |
| SLC36A1      | -0.12627 |
| ANKRD13A     | -0.12628 |
| AL035071.1   | -0.12632 |
| NFKB1        | -0.12637 |
| VPS13B-DT    | -0.12639 |
| PSMC6        | -0.12643 |
| AL135818.2   | -0.12644 |
| FNIP1        | -0.12645 |
| EPS15        | -0.12646 |
| AC090617.5   | -0.12648 |
| THAP6        | -0.12649 |
| AC245140.2   | -0.12649 |
| LYRM9        | -0.12649 |
| LPIN2        | -0.1265  |
| SLC25A28     | -0.12652 |
| KIF3A        | -0.12655 |
| DBP          | -0.12663 |
| MARS1        | -0.12669 |
| FKBP5        | -0.1267  |
| FGG          | -0.12671 |
| AL355355.2   | -0.12672 |
| SNHG9        | -0.12675 |
| HESX1        | -0.12682 |
| MIR3153      | -0.12682 |
| SLC39A8      | -0.12683 |

|            |          |
|------------|----------|
| ZNF559     | -0.12684 |
| ANKRD22    | -0.12684 |
| ARF6       | -0.1269  |
| JRK        | -0.12691 |
| DUSP8P5    | -0.12692 |
| PLPPR4     | -0.12695 |
| ANKRD26    | -0.12696 |
| AP001432.1 | -0.12697 |
| PSAP       | -0.12698 |
| EIF4HP2    | -0.12698 |
| PPARGC1A   | -0.127   |
| AP001052.1 | -0.12701 |
| CACNA2D4   | -0.12707 |
| GGA1       | -0.12708 |
| GPR199P    | -0.1271  |
| HOXA-AS2   | -0.12716 |
| TTC26      | -0.12717 |
| IFT172     | -0.12717 |
| INSIG1     | -0.12718 |
| MIR3176    | -0.12718 |
| AC024909.1 | -0.1273  |
| NCOA2      | -0.12731 |
| AL162586.1 | -0.12736 |
| AC008035.1 | -0.12737 |
| ATAD2B     | -0.12739 |
| MAP10      | -0.12746 |
| ZSWIM5     | -0.12748 |
| C3orf62    | -0.1275  |
| ZNF227     | -0.1275  |
| C10orf95   | -0.12754 |
| TEPP       | -0.1276  |
| C2CD2L     | -0.12761 |
| UQCRFS1    | -0.12763 |
| SLC47A1    | -0.12768 |
| AL591895.1 | -0.12776 |
| PSD        | -0.12777 |
| SCAF11     | -0.12779 |
| FCGR3B     | -0.12783 |
| TTC39A-AS1 | -0.1279  |
| METTL22    | -0.12791 |
| CENATAC-DT | -0.12796 |
| CBY1       | -0.12797 |
| ZNF699     | -0.12801 |
| C19orf44   | -0.12802 |
| FBXO16     | -0.12807 |
| AC007842.1 | -0.1281  |
| SAMD12-AS1 | -0.1281  |
| RAB24      | -0.12811 |
| ME3        | -0.12812 |



|             |          |
|-------------|----------|
| ANKRD46     | -0.12814 |
| INSR        | -0.12817 |
| ARL6IP4     | -0.1282  |
| LINC01287   | -0.12828 |
| RSPO4       | -0.12832 |
| RANBP6      | -0.12832 |
| MPND        | -0.12835 |
| SLC25A19    | -0.12836 |
| RNY4P10     | -0.12838 |
| TPST2       | -0.1284  |
| HECTD1      | -0.12841 |
| TUSC3       | -0.12845 |
| TMEM243     | -0.12847 |
| AC011450.1  | -0.12856 |
| NFATC2IP    | -0.12856 |
| SPACA6      | -0.12863 |
| RAPGEF5     | -0.12863 |
| TRIT1       | -0.12867 |
| STING1      | -0.1287  |
| EPB41L4A-DT | -0.12872 |
| LPCAT2      | -0.12879 |
| MIR4635     | -0.12881 |
| STRN3       | -0.12882 |
| RHPN1       | -0.12892 |
| FAM126A     | -0.12899 |
| USP15       | -0.129   |
| SOCS3       | -0.12906 |
| PLA2G12B    | -0.12906 |
| NUCB2       | -0.12916 |
| FMR1        | -0.12919 |
| ZNF688      | -0.1292  |
| VCPIP1      | -0.12921 |
| EFCAB7      | -0.12922 |
| PI4K2B      | -0.12924 |
| KNTC1       | -0.12929 |
| TBX5-AS1    | -0.12941 |
| GYG1        | -0.12953 |
| SAMD4A      | -0.12957 |
| MS4A15      | -0.12966 |
| ARAP1       | -0.12985 |
| LTO1        | -0.12995 |
| H2AJ        | -0.12997 |
| NOL12       | -0.12998 |
| ATG14       | -0.13006 |
| C14orf119   | -0.13007 |
| AFDN-DT     | -0.13015 |
| ZNF10       | -0.13025 |
| SDR42E1     | -0.13026 |
| ZDHHC8P1    | -0.13027 |

|            |          |
|------------|----------|
| MGAT1      | -0.13043 |
| AC007114.1 | -0.13051 |
| ZNF789     | -0.13055 |
| CHST7      | -0.13063 |
| ATRX       | -0.13065 |
| PLEKHB1    | -0.13066 |
| ARAP2      | -0.13068 |
| PDE6B      | -0.13071 |
| MTMR6      | -0.13072 |
| APBB1      | -0.13078 |
| MADD       | -0.13088 |
| USPL1      | -0.13092 |
| AC008736.1 | -0.13094 |
| MX2        | -0.13098 |
| STS        | -0.131   |
| BIRC6      | -0.13102 |
| DYNLT1     | -0.13104 |
| SLC35E3    | -0.13106 |
| TRMT13     | -0.13108 |
| FUT1       | -0.13117 |
| ARHGEF3    | -0.13124 |
| PLSCR1     | -0.13127 |
| IQCB1      | -0.13129 |
| CLCN5      | -0.13133 |
| SLC27A5    | -0.13138 |
| NFYB       | -0.13138 |
| CYBC1      | -0.1314  |
| TPSP2      | -0.13141 |
| CD70       | -0.13143 |
| MIR4728    | -0.13152 |
| TMEM251    | -0.13155 |
| RAB4B      | -0.13161 |
| MAPK8IP2   | -0.13168 |
| MDP1       | -0.13181 |
| RALGPS2    | -0.13188 |
| PUS10      | -0.13194 |
| KCNJ15     | -0.13195 |
| ICAM2      | -0.13202 |
| ZNF620     | -0.13214 |
| SMC5-AS1   | -0.13217 |
| ATG4A      | -0.13221 |
| PRKD1      | -0.13222 |
| KHK        | -0.13223 |
| SCN9A      | -0.13224 |
| TNFAIP8L3  | -0.13224 |
| IKBKB      | -0.13229 |
| ACIN1      | -0.13235 |
| ACER3      | -0.13242 |
| BCLAF3     | -0.13253 |

|            |          |
|------------|----------|
| RNU6-529P  | -0.13255 |
| C1GALT1C1L | -0.1326  |
| SWSAP1     | -0.13262 |
| ACVR2A     | -0.13271 |
| MPP7       | -0.13276 |
| SBK1       | -0.13277 |
| AL139246.5 | -0.13278 |
| MSH5       | -0.13278 |
| TTC28-AS1  | -0.13281 |
| ZC3H7A     | -0.13284 |
| ABI2       | -0.13286 |
| ERV3-1     | -0.13292 |
| STK32A     | -0.13312 |
| ZNF383     | -0.13326 |
| GAS6       | -0.13326 |
| AC009041.3 | -0.13328 |
| MT-RNR1    | -0.13328 |
| METTL17    | -0.1333  |
| HSBP1      | -0.13334 |
| TMEM170B   | -0.13337 |
| TFB1M      | -0.13338 |
| ITSN2      | -0.1334  |
| MSANTD2    | -0.13341 |
| MPP6       | -0.13341 |
| DDX11L2    | -0.13346 |
| ZNF543     | -0.13352 |
| RNASEH2B   | -0.13359 |
| MTCO1P53   | -0.1336  |
| ZNF580     | -0.13363 |
| CXCL1      | -0.13367 |
| ELK4       | -0.1337  |
| TRAPPC8    | -0.13376 |
| TNIK       | -0.13379 |
| AC009065.8 | -0.13388 |
| RNF169     | -0.13389 |
| FAR1       | -0.13391 |
| ZNF37A     | -0.13392 |
| CIT        | -0.13393 |
| CCDC125    | -0.134   |
| ZFX        | -0.13402 |
| RNF150     | -0.13403 |
| ABHD18     | -0.13409 |
| DPY19L1P1  | -0.13412 |
| MRTFB      | -0.13418 |
| SCGB1B2P   | -0.13423 |
| PLAC9      | -0.13431 |
| ARFGEF1    | -0.13433 |
| MTDH       | -0.13433 |
| PLCG1      | -0.13434 |

|            |          |
|------------|----------|
| AC132008.2 | -0.13435 |
| URAHP      | -0.13435 |
| SULT1C2    | -0.1344  |
| EID3       | -0.13441 |
| ZNF773     | -0.13443 |
| CLSTN3     | -0.13444 |
| ZNF792     | -0.13454 |
| SAMD12     | -0.13457 |
| LAPTM4B    | -0.13459 |
| CEP78      | -0.13463 |
| FAM161A    | -0.13466 |
| PARVB      | -0.13468 |
| RHBDD1     | -0.1347  |
| MINDY3     | -0.1347  |
| CABLES1    | -0.13485 |
| ERBB2      | -0.1349  |
| RPL9P32    | -0.13493 |
| WASHC4     | -0.13494 |
| PRKAA2     | -0.13495 |
| LINC01290  | -0.13506 |
| PPM1A      | -0.13528 |
| LY6G5B     | -0.13534 |
| AC079922.2 | -0.13534 |
| AC004771.2 | -0.13547 |
| MIR23B     | -0.13556 |
| FBP1       | -0.13556 |
| RNU6-882P  | -0.13559 |
| AC018638.4 | -0.13561 |
| LINC01004  | -0.13561 |
| PPFIBP2    | -0.13561 |
| APOBEC3B   | -0.13566 |
| C17orf49   | -0.13566 |
| ZNF516     | -0.13572 |
| ODF2L      | -0.13575 |
| DOCK9-DT   | -0.13576 |
| KLF6       | -0.13583 |
| PHIP       | -0.13584 |
| GRAMD1A    | -0.13596 |
| SCNN1D     | -0.13599 |
| HECTD2     | -0.13602 |
| MYO18A     | -0.13607 |
| COX6C      | -0.13609 |
| CA13       | -0.13614 |
| PGAP3      | -0.13616 |
| ATAD5      | -0.13621 |
| RPS29      | -0.13626 |
| CEP350     | -0.13631 |
| LINC01852  | -0.13636 |
| AC005726.1 | -0.13638 |

|            |          |
|------------|----------|
| LAMP3      | -0.13639 |
| THAP12     | -0.13642 |
| PYCARD     | -0.13648 |
| ASCL5      | -0.13651 |
| AC103957.2 | -0.1367  |
| NSUN5P1    | -0.13672 |
| FAM135A    | -0.13672 |
| AP001434.1 | -0.13676 |
| ATP6V0E2   | -0.13678 |
| ZNF790-AS1 | -0.13679 |
| ARHGAP31   | -0.13686 |
| ZNF514     | -0.13688 |
| RBM23      | -0.13695 |
| PRODH      | -0.13697 |
| LINC00174  | -0.13698 |
| CEBPD      | -0.13705 |
| CPEB4      | -0.13706 |
| CCNL2      | -0.13714 |
| YTHDC2     | -0.13719 |
| IFI27L2    | -0.1372  |
| KCTD17     | -0.13721 |
| AC093388.1 | -0.13726 |
| LRRC73     | -0.13727 |
| COA5       | -0.13729 |
| HSCB       | -0.1373  |
| LINC00667  | -0.13734 |
| EIF4A1     | -0.13738 |
| UNC13B     | -0.13747 |
| SCFD1      | -0.13748 |
| AC116913.1 | -0.13752 |
| NR2C2      | -0.13753 |
| HELLS      | -0.13755 |
| UXT        | -0.13756 |
| TMEM80     | -0.13763 |
| SPCS3      | -0.13765 |
| ARHGEF10L  | -0.13765 |
| RAD52      | -0.13767 |
| DGKG       | -0.1377  |
| SEPTIN7P2  | -0.13771 |
| POLR2I     | -0.13772 |
| RHOG       | -0.13776 |
| RPS29P5    | -0.13785 |
| CDKN1B     | -0.13786 |
| MCCC1-AS1  | -0.13788 |
| ANKRD33B   | -0.13792 |
| GJA4       | -0.13798 |
| TENT2      | -0.13813 |
| PHC1       | -0.13815 |
| SUN2       | -0.13817 |

|            |          |
|------------|----------|
| CBLB       | -0.13819 |
| PLXNA2     | -0.1382  |
| NBEA       | -0.13821 |
| ABCC6      | -0.13823 |
| RANGRF     | -0.13827 |
| NRDE2      | -0.13828 |
| IRF7       | -0.13829 |
| SLAIN1     | -0.13829 |
| IRX1       | -0.13832 |
| HNRNPH1    | -0.13833 |
| SRGN       | -0.13836 |
| CD200      | -0.13838 |
| ALOX5AP    | -0.13841 |
| BRCA2      | -0.13842 |
| RRN3P3     | -0.13852 |
| AC026471.1 | -0.13853 |
| CENATAC    | -0.13857 |
| FREM2      | -0.13858 |
| SOS2       | -0.13866 |
| FLJ37453   | -0.13867 |
| BIN3       | -0.1387  |
| KMT2C      | -0.13877 |
| ZHX2       | -0.13885 |
| NUTM2B-AS1 | -0.13886 |
| DUBR       | -0.13888 |
| DGAT2      | -0.13891 |
| NBPF11     | -0.13893 |
| ITPKB      | -0.13897 |
| CEP192     | -0.13899 |
| AL031673.1 | -0.13901 |
| SOBP       | -0.13907 |
| AL445187.1 | -0.1391  |
| MAST4-AS1  | -0.13913 |
| SH2B1      | -0.13915 |
| CDK5RAP3   | -0.13916 |
| CCSER1     | -0.13918 |
| HELQ       | -0.13919 |
| FAM171A1   | -0.13921 |
| LINC01963  | -0.13935 |
| CLASRP     | -0.13936 |
| SASH1      | -0.13937 |
| IGSF9B     | -0.13941 |
| AAK1       | -0.13947 |
| OTULIN     | -0.13953 |
| ATF4       | -0.13956 |
| C1QTNF1    | -0.13957 |
| TRIM38     | -0.13966 |
| RFX7       | -0.13969 |
| FHDC1      | -0.1397  |

|             |          |
|-------------|----------|
| ZNF141      | -0.13972 |
| INPP5J      | -0.13973 |
| SLC25A5-AS1 | -0.13975 |
| VPS37A      | -0.13975 |
| CRBN        | -0.13979 |
| TBC1D31     | -0.13987 |
| AC018690.1  | -0.13989 |
| WFDC21P     | -0.13994 |
| STAT2       | -0.13996 |
| DNAAF2      | -0.13999 |
| ZBTB48      | -0.13999 |
| DIPK2A      | -0.14    |
| AC061992.2  | -0.14002 |
| RPL39P16    | -0.14003 |
| RBM25       | -0.14004 |
| AC010618.2  | -0.14008 |
| EMSY        | -0.14011 |
| GALC        | -0.14018 |
| AC004951.2  | -0.14018 |
| TRPS1       | -0.14019 |
| B3GNT7      | -0.14021 |
| SLC39A6     | -0.14021 |
| OLFM1       | -0.14026 |
| AP002360.1  | -0.14028 |
| AL031282.1  | -0.14034 |
| ZNF814      | -0.14038 |
| KANSL1-AS1  | -0.14049 |
| AC083880.1  | -0.14054 |
| DENND1B     | -0.14057 |
| PPP3CB-AS1  | -0.14057 |
| PLA2R1      | -0.14067 |
| ATP8B1      | -0.14068 |
| SMOC2       | -0.14069 |
| AC245297.1  | -0.14071 |
| LINC01224   | -0.14082 |
| PNRC1       | -0.14082 |
| TOB1-AS1    | -0.14087 |
| SHE         | -0.14088 |
| SPAAR       | -0.14089 |
| AC022144.1  | -0.14096 |
| AC040977.1  | -0.14104 |
| BDP1        | -0.1411  |
| AL031727.1  | -0.14111 |
| FMO4        | -0.14111 |
| GJA5        | -0.14113 |
| AL021878.2  | -0.14117 |
| SCTR        | -0.14126 |
| SYNGR3      | -0.14127 |
| DYNLT2B     | -0.14132 |

|            |          |
|------------|----------|
| SHROOM4    | -0.14142 |
| C2orf49-DT | -0.14145 |
| NKX2-8     | -0.14146 |
| LFNG       | -0.14149 |
| DENND1A    | -0.1415  |
| MED27      | -0.14152 |
| CRYBB2P1   | -0.14153 |
| WASF3      | -0.14153 |
| CD24P4     | -0.14159 |
| RBM15      | -0.14163 |
| ARFGEF3    | -0.14166 |
| DNAJC27    | -0.14167 |
| GTF3A      | -0.14172 |
| MYEF2      | -0.14176 |
| ZNF26      | -0.1418  |
| CREBZF     | -0.14197 |
| SYTL2      | -0.14211 |
| ATP6V0A2   | -0.14211 |
| TFEB       | -0.14217 |
| MACF1      | -0.1422  |
| ZNF248     | -0.14223 |
| DBI        | -0.14224 |
| SARDH      | -0.14237 |
| EMILIN1    | -0.14248 |
| HOMEZ      | -0.1425  |
| C4B        | -0.14251 |
| CREBL2     | -0.14251 |
| AL445645.1 | -0.14261 |
| MFSD4B     | -0.14264 |
| SOCS2-AS1  | -0.14264 |
| METTL4     | -0.14266 |
| HEXD       | -0.14275 |
| WDR35      | -0.14278 |
| RBM39      | -0.14279 |
| BIRC3      | -0.14281 |
| AP003352.1 | -0.14284 |
| SLC36A4    | -0.14288 |
| AP004609.3 | -0.14291 |
| ZNF808     | -0.14298 |
| EZH1       | -0.14301 |
| LMF1       | -0.14304 |
| SDHAP1     | -0.14307 |
| HYKK       | -0.14309 |
| AC004812.2 | -0.1432  |
| MAP1LC3A   | -0.14323 |
| LINC02866  | -0.14329 |
| AC006547.1 | -0.14331 |
| WNT10A     | -0.14331 |
| ZC3H8      | -0.14337 |



|             |          |
|-------------|----------|
| VMP1        | -0.14338 |
| ST3GAL5-AS1 | -0.14339 |
| DACH1       | -0.1434  |
| EDNRB       | -0.14343 |
| AC009812.1  | -0.14347 |
| STIMATE     | -0.14349 |
| FRMD4A      | -0.14356 |
| BRWD1-AS2   | -0.14359 |
| MIR4482     | -0.1436  |
| IFT27       | -0.1436  |
| TMEM175     | -0.14364 |
| AL355574.1  | -0.14368 |
| PAN2        | -0.14374 |
| MSL2        | -0.14375 |
| COL4A3      | -0.14375 |
| MIR765      | -0.14379 |
| TIA1        | -0.14379 |
| MCF2L       | -0.1438  |
| IFI27L1     | -0.14384 |
| PRICKLE2    | -0.14384 |
| SLC29A4     | -0.14385 |
| LRCH1       | -0.1439  |
| RPL21P28    | -0.14392 |
| CHAC1       | -0.14393 |
| ZDHHC13     | -0.14393 |
| AC016739.1  | -0.14396 |
| AL049872.1  | -0.14397 |
| ALDH1A2     | -0.14399 |
| HOXB-AS2    | -0.14399 |
| C2orf92     | -0.144   |
| TNFRSF11A   | -0.144   |
| OGFRL1      | -0.14401 |
| MUC12-AS1   | -0.14402 |
| GK5         | -0.14404 |
| TNNC1       | -0.14405 |
| SMPD4BP     | -0.14407 |
| PLIN5       | -0.14416 |
| AASS        | -0.14418 |
| ZNF117      | -0.14426 |
| DPYSL4      | -0.14428 |
| ALMS1       | -0.14437 |
| AC005082.1  | -0.14442 |
| ARL9        | -0.14447 |
| ZNF181      | -0.14447 |
| ZBTB5       | -0.14461 |
| ZFYVE26     | -0.14462 |
| IRF2        | -0.14466 |
| ZNF575      | -0.14468 |
| AL136531.1  | -0.14468 |

|            |          |
|------------|----------|
| GPRC5D     | -0.14471 |
| CYB561A3   | -0.14474 |
| GPT2       | -0.14483 |
| TLR5       | -0.14496 |
| DCLRE1C    | -0.14499 |
| NDUFA10    | -0.145   |
| BIVM       | -0.14504 |
| WASHC3     | -0.14505 |
| PRPF38B    | -0.1451  |
| C4orf33    | -0.14511 |
| GLUD1P3    | -0.14517 |
| MSTO2P     | -0.14526 |
| APIP       | -0.14543 |
| AC026367.3 | -0.14548 |
| AC114730.3 | -0.14562 |
| AC015871.3 | -0.14563 |
| AC131212.3 | -0.14565 |
| AC008438.1 | -0.14569 |
| HCG4B      | -0.14571 |
| ACSS1      | -0.14583 |
| AC011477.2 | -0.14587 |
| ZNF555     | -0.1459  |
| AC024075.2 | -0.14592 |
| ZNF236-DT  | -0.14607 |
| RIN3       | -0.1461  |
| PRSS21     | -0.14612 |
| C18orf21   | -0.14614 |
| FAM104B    | -0.14615 |
| ORMDL1     | -0.1463  |
| ZNF484     | -0.14632 |
| AL049840.5 | -0.14662 |
| FIG4       | -0.14664 |
| RABL2B     | -0.14672 |
| TSEN15     | -0.14672 |
| UBE2FP1    | -0.14673 |
| SYNRG      | -0.14679 |
| EFCAB2     | -0.14682 |
| SNORD19    | -0.14688 |
| PSAT1      | -0.1469  |
| RPS6KA3    | -0.14695 |
| TMEM74B    | -0.147   |
| RUSC1-AS1  | -0.14711 |
| LPAR3      | -0.14716 |
| AC016394.1 | -0.14717 |
| SNX29      | -0.14718 |
| FGF7       | -0.14723 |
| CGAS       | -0.1473  |
| AC091390.3 | -0.1473  |
| ZCCHC24    | -0.14732 |

|            |          |
|------------|----------|
| CEPT1      | -0.14734 |
| CAPG       | -0.14735 |
| MELTF-AS1  | -0.14736 |
| ENTPD3     | -0.14743 |
| TMEM234    | -0.14748 |
| ELP2       | -0.14749 |
| ZNF284     | -0.14753 |
| MPHOSPH9   | -0.14756 |
| TMEM144    | -0.14771 |
| RBM5       | -0.14779 |
| FAIM       | -0.14784 |
| ABCC5      | -0.14786 |
| ZNF214     | -0.14793 |
| TNFSF12    | -0.14797 |
| ZNF674-AS1 | -0.14801 |
| ATP9B      | -0.14813 |
| SHLD3      | -0.14815 |
| SPRR2C     | -0.14818 |
| IL17RB     | -0.14818 |
| BCO1       | -0.14825 |
| HPS1       | -0.14826 |
| ZFP57      | -0.14827 |
| AC092032.1 | -0.14828 |
| NPAT       | -0.1483  |
| ZNF720     | -0.14835 |
| CASP7      | -0.14839 |
| HAR1A      | -0.14839 |
| ZFP30      | -0.14857 |
| MZF1-AS1   | -0.14859 |
| MTMR10     | -0.14859 |
| KLHL15     | -0.14863 |
| ATXN3      | -0.14873 |
| ATP13A4    | -0.14875 |
| FOXO1      | -0.14876 |
| KRTAP5-1   | -0.14885 |
| SLC25A14   | -0.14889 |
| SNHG12     | -0.14901 |
| TCIRG1     | -0.14902 |
| DUSP19     | -0.14903 |
| MTERF3     | -0.14908 |
| WDFY2      | -0.14918 |
| HBA2       | -0.14938 |
| TENM1      | -0.14939 |
| ZNF649     | -0.14954 |
| SZT2       | -0.14955 |
| AOC2       | -0.14956 |
| RMC1       | -0.14962 |
| ARL5A      | -0.14964 |
| LSMEM1     | -0.1497  |

|            |          |
|------------|----------|
| CLMN       | -0.14974 |
| SNHG30     | -0.14976 |
| ERICH1     | -0.14982 |
| LINC02416  | -0.14989 |
| MFHAS1     | -0.14992 |
| TET2       | -0.15001 |
| CEP43      | -0.15013 |
| KLC1       | -0.15019 |
| KLHDC2     | -0.15027 |
| CHKA       | -0.15033 |
| ADM5       | -0.15035 |
| CCSER2     | -0.15037 |
| ZNF582     | -0.15039 |
| ABHD12     | -0.1504  |
| DUTP6      | -0.15045 |
| MBD2       | -0.1505  |
| AL162151.2 | -0.15066 |
| TMPRSS2    | -0.15072 |
| DTD2       | -0.15072 |
| CPEB3      | -0.15074 |
| INTS8      | -0.15076 |
| LINS1      | -0.1508  |
| ARL11      | -0.15081 |
| ZNF417     | -0.15085 |
| TMEM70     | -0.15086 |
| AC060766.1 | -0.15088 |
| SNHG1      | -0.15091 |
| TTC12      | -0.15096 |
| H4C12      | -0.15102 |
| ACAP2      | -0.1512  |
| HOTAIRM1   | -0.15128 |
| MARCKS     | -0.15129 |
| GEMIN2     | -0.15143 |
| AKAP11     | -0.15143 |
| AC020915.1 | -0.15148 |
| PPOX       | -0.15166 |
| NOTCH4     | -0.15169 |
| C11orf80   | -0.15169 |
| AC003072.1 | -0.15172 |
| MCTP1      | -0.15173 |
| PROS1      | -0.15174 |
| MTMR11     | -0.15176 |
| HEIH       | -0.15176 |
| RHOJ       | -0.15184 |
| EXOC5      | -0.15188 |
| IKBKE      | -0.15189 |
| NAPSA      | -0.15193 |
| ZFC3H1     | -0.15196 |
| MRPL45P2   | -0.15197 |

|            |          |
|------------|----------|
| XPR1       | -0.152   |
| MLLT6      | -0.15212 |
| AL355488.1 | -0.15214 |
| PFN1P6     | -0.15216 |
| RILPL2     | -0.15224 |
| MDM1       | -0.15226 |
| FBLN1      | -0.1523  |
| IFT74      | -0.15233 |
| HSF2       | -0.15235 |
| RNU6-37P   | -0.15239 |
| RAD9A      | -0.15239 |
| GABBR1     | -0.15246 |
| TMEM116    | -0.1525  |
| NPC2       | -0.15251 |
| TTC13      | -0.15259 |
| LINC02846  | -0.15266 |
| ELOVL7     | -0.15272 |
| STYX       | -0.15281 |
| AC079807.1 | -0.15292 |
| CSK        | -0.15294 |
| ANKRD18EP  | -0.15296 |
| ANAPC4     | -0.15299 |
| EPB41L4A   | -0.15319 |
| GLB1L      | -0.15321 |
| MCM3AP-AS1 | -0.15325 |
| ZZEF1      | -0.15326 |
| AFG1L      | -0.15326 |
| LCORL      | -0.15331 |
| WDFY1      | -0.15339 |
| LONRF1     | -0.1534  |
| MITD1      | -0.15342 |
| AL031717.1 | -0.15344 |
| OTUD3      | -0.1535  |
| AC138207.8 | -0.15359 |
| SMARCA2    | -0.1536  |
| CD300C     | -0.15361 |
| AP001062.1 | -0.15364 |
| B3GAT1     | -0.15379 |
| SWAP70     | -0.15381 |
| ZNF630     | -0.15385 |
| AC093249.6 | -0.15386 |
| RGS12      | -0.15392 |
| GPR146     | -0.15394 |
| AL354718.1 | -0.15399 |
| FANK1      | -0.15403 |
| TNFSF15    | -0.15405 |
| BEX1       | -0.15417 |
| ZBED5      | -0.15418 |
| PTPN4      | -0.15419 |

|            |          |
|------------|----------|
| ENTPD4     | -0.15425 |
| CELF2      | -0.15426 |
| CHURC1     | -0.15427 |
| NNT        | -0.1543  |
| PABPN1     | -0.15433 |
| RNF146     | -0.15444 |
| FLNB-AS1   | -0.15444 |
| AC009065.4 | -0.15445 |
| PCSK1N     | -0.15446 |
| CYP26B1    | -0.15447 |
| GON7       | -0.15447 |
| AP000648.4 | -0.15449 |
| AC004241.3 | -0.15458 |
| ASB16      | -0.1547  |
| DEF8       | -0.15473 |
| DDX39A     | -0.15477 |
| MFSD1      | -0.15477 |
| CGRRF1     | -0.15479 |
| FAM111A-DT | -0.15481 |
| ZNF195     | -0.15482 |
| AC080038.1 | -0.15487 |
| AL671883.2 | -0.15489 |
| ITPR1      | -0.15491 |
| ADA        | -0.15494 |
| AC096921.2 | -0.15496 |
| AC064807.1 | -0.15496 |
| CCDC18-AS1 | -0.15506 |
| EGFL6      | -0.15508 |
| SYNJ2BP    | -0.15511 |
| ZNF271P    | -0.15516 |
| AC022167.2 | -0.15516 |
| C1QTNF7    | -0.15518 |
| FOXO3      | -0.15522 |
| AL139327.1 | -0.15529 |
| AC093726.2 | -0.15533 |
| IL1R1      | -0.15535 |
| AC003973.2 | -0.15537 |
| CYGB       | -0.15538 |
| AC053527.2 | -0.15543 |
| RHOU       | -0.15549 |
| PIDD1      | -0.1555  |
| GK-IT1     | -0.15561 |
| MX1        | -0.15574 |
| ADGRE2     | -0.15578 |
| AC012645.1 | -0.15578 |
| RFTN2      | -0.15581 |
| SNORD51    | -0.15592 |
| CLHC1      | -0.15592 |
| ARL14EP    | -0.15595 |

|            |          |
|------------|----------|
| GALT       | -0.15598 |
| AC004980.1 | -0.15602 |
| SORBS1     | -0.15603 |
| PTPRD      | -0.15605 |
| ZNF302     | -0.15608 |
| HNRNPA1L2  | -0.15616 |
| MBP        | -0.1562  |
| TXNIP      | -0.15623 |
| RNA5SP122  | -0.15626 |
| PPWD1      | -0.15627 |
| HSPA13     | -0.15635 |
| ZNF189     | -0.15637 |
| DTX2P1     | -0.15646 |
| RRM2B      | -0.15648 |
| TMSB4XP1   | -0.15649 |
| RNU6-476P  | -0.15655 |
| OTUD1      | -0.15665 |
| COMMD3     | -0.15665 |
| NGDN       | -0.15671 |
| EPG5       | -0.15676 |
| ZNF572     | -0.15677 |
| C21orf91   | -0.15677 |
| AC109583.3 | -0.15678 |
| LINC02361  | -0.15688 |
| NAV2       | -0.1569  |
| CSAD       | -0.15692 |
| ANKRD65    | -0.15695 |
| ZNF225     | -0.15697 |
| STOM       | -0.157   |
| STRBP      | -0.15704 |
| LNCTAM34A  | -0.15705 |
| AKAP17A    | -0.15709 |
| RC3H1      | -0.15711 |
| MPDZ       | -0.15726 |
| ARHGAP24   | -0.15728 |
| SPNS1      | -0.15749 |
| LCAT       | -0.15773 |
| USF3       | -0.15775 |
| AC027228.2 | -0.15775 |
| GOT1       | -0.15781 |
| PLGRKT     | -0.1579  |
| GPR137B    | -0.15792 |
| LRAT       | -0.15792 |
| SH3BP5     | -0.15793 |
| DYRK2      | -0.15798 |
| RN7SL192P  | -0.15799 |
| TYK2       | -0.15811 |
| AC004918.3 | -0.15811 |
| MRI1       | -0.15813 |

|            |          |
|------------|----------|
| AC104461.1 | -0.15815 |
| STIM2      | -0.1582  |
| WHRN       | -0.15822 |
| MLH3       | -0.1583  |
| TRAPPC9    | -0.1583  |
| AL691482.3 | -0.15838 |
| PSD4       | -0.15838 |
| AGAP4      | -0.15838 |
| AC133552.5 | -0.15841 |
| NDRG2      | -0.15849 |
| AP002840.2 | -0.15854 |
| CRELD2     | -0.15858 |
| KLRA1P     | -0.15861 |
| ZNNT1      | -0.15862 |
| AF186192.1 | -0.15862 |
| FAM24B     | -0.15863 |
| ACAD8      | -0.15865 |
| VMO1       | -0.15868 |
| AL121603.2 | -0.15869 |
| TTC9       | -0.15878 |
| TNF        | -0.15878 |
| AL132656.4 | -0.15882 |
| TXNL4A     | -0.15883 |
| QKI        | -0.15885 |
| PARPBP     | -0.15887 |
| HOXC11     | -0.15888 |
| FNIP2      | -0.15888 |
| KIF17      | -0.15893 |
| EIF3EP1    | -0.15898 |
| HDAC10     | -0.159   |
| RNU1-36P   | -0.15904 |
| CYRIB      | -0.15904 |
| IPCEF1     | -0.15909 |
| AC109309.1 | -0.15919 |
| POU6F2     | -0.15935 |
| AC092919.2 | -0.15939 |
| RCAN3      | -0.15941 |
| IFI35      | -0.15943 |
| CBWD1      | -0.15944 |
| SEPSECS    | -0.15944 |
| VAMP5      | -0.15948 |
| KDM6A      | -0.15949 |
| ZNF345     | -0.15959 |
| SLC25A29   | -0.15965 |
| CALM1      | -0.15967 |
| AC021016.1 | -0.15978 |
| AGTPBP1    | -0.15987 |
| ERVK3-1    | -0.15989 |
| RAP2C-AS1  | -0.15997 |



|              |          |
|--------------|----------|
| IL17RA       | -0.16    |
| AC046185.3   | -0.16003 |
| CRMP1        | -0.16007 |
| CEP295       | -0.16022 |
| MSI2         | -0.16023 |
| SMIM27       | -0.16027 |
| UBL7-AS1     | -0.16035 |
| LRTOMT       | -0.16042 |
| AL050309.1   | -0.16044 |
| VASH1-AS1    | -0.16046 |
| PXYLP1       | -0.16049 |
| L2HGDH       | -0.16057 |
| SLC2A13      | -0.16058 |
| RRAGB        | -0.16059 |
| COQ10A       | -0.16063 |
| CEP250       | -0.16073 |
| AC080037.2   | -0.16076 |
| ZNF799       | -0.16083 |
| CPT1A        | -0.16084 |
| AC024451.2   | -0.16087 |
| H4C8         | -0.1609  |
| CIRBP        | -0.16094 |
| RBM33        | -0.16096 |
| AL031775.2   | -0.16099 |
| LINC02198    | -0.16106 |
| SIPA1L2      | -0.16108 |
| BBIP1        | -0.16113 |
| MT-ND6       | -0.16117 |
| MAX          | -0.16125 |
| CPD          | -0.16139 |
| HECTD4       | -0.16145 |
| MAPK11       | -0.1616  |
| AC011468.1   | -0.16171 |
| TBCB         | -0.16176 |
| KAT8         | -0.16179 |
| CFH          | -0.16182 |
| RBM12B       | -0.16183 |
| C15orf65     | -0.16183 |
| GASK1B       | -0.16184 |
| RHOQP1       | -0.16185 |
| KLHDC7B      | -0.16189 |
| TMX3         | -0.16195 |
| CNTNAP2      | -0.16196 |
| CXCL14       | -0.16199 |
| ARHGEF26     | -0.16199 |
| FRS2         | -0.16205 |
| TMEM161B-AS1 | -0.16209 |
| INPP4B       | -0.1621  |
| ERCC6L2      | -0.16215 |

|            |          |
|------------|----------|
| TBC1D24    | -0.16218 |
| LTB4R2     | -0.1622  |
| ERICH2     | -0.1622  |
| AC006504.7 | -0.16226 |
| GTF2IP23   | -0.1623  |
| FGFR4      | -0.16231 |
| AL118516.1 | -0.16233 |
| FHIT       | -0.16235 |
| MIA2       | -0.16244 |
| RASGRP4    | -0.16248 |
| AL359962.2 | -0.16252 |
| CALCRL     | -0.16257 |
| HSPA12B    | -0.16257 |
| AL118558.3 | -0.16268 |
| IZUMO4     | -0.1627  |
| TAPT1      | -0.16272 |
| PSMA6P1    | -0.16275 |
| RAB26      | -0.16281 |
| NOP56P3    | -0.16284 |
| SPRR2D     | -0.16286 |
| DNAJC9-AS1 | -0.16288 |
| AP001486.2 | -0.16289 |
| CHFR       | -0.16297 |
| DRAM2      | -0.16302 |
| PMP22      | -0.16311 |
| DCAF5      | -0.16316 |
| OSTM1      | -0.16317 |
| VCPKMT     | -0.16323 |
| LY6G5C     | -0.16338 |
| TTC21B     | -0.16338 |
| PTPN1      | -0.1634  |
| AP4B1      | -0.1634  |
| AL118558.4 | -0.16352 |
| SMIM8      | -0.16352 |
| NDST2      | -0.16352 |
| SLC9A3     | -0.1636  |
| AL031058.1 | -0.16361 |
| AC016590.3 | -0.16362 |
| AP5M1      | -0.16378 |
| ZBED6      | -0.16378 |
| IQSEC1     | -0.16386 |
| PSMA3      | -0.1639  |
| EIF1AY     | -0.16411 |
| GABPB1-AS1 | -0.16412 |
| ETV6       | -0.16414 |
| ZMYND15    | -0.16416 |
| MBNL3      | -0.16416 |
| ZFP90      | -0.16416 |
| AC018638.7 | -0.16418 |

|                  |          |
|------------------|----------|
| THAP8            | -0.1643  |
| RNF38            | -0.16432 |
| AL354707.1       | -0.16447 |
| ZYG11A           | -0.16452 |
| PDXDC2P-NPIP814P | -0.16453 |
| SMPD2            | -0.16455 |
| ZNF14            | -0.16457 |
| DLEU2            | -0.16472 |
| SERPINI1         | -0.16479 |
| MIR559           | -0.16501 |
| CETN2            | -0.16502 |
| GTPBP1           | -0.16507 |
| ACSF3            | -0.16508 |
| LINC00476        | -0.16508 |
| ZNF79            | -0.16509 |
| GPX1P1           | -0.16512 |
| HABP4            | -0.16516 |
| SP140L           | -0.16521 |
| ADGRE5           | -0.16531 |
| AC084824.1       | -0.16534 |
| TRIM3            | -0.16535 |
| EPM2AIP1         | -0.16536 |
| ZNF844           | -0.16536 |
| RAB2B            | -0.16541 |
| ZNF487           | -0.16541 |
| MIR4786          | -0.16541 |
| HM13-IT1         | -0.16554 |
| ANKRD49          | -0.16564 |
| C20orf194        | -0.1657  |
| IFI6             | -0.16573 |
| ACP2             | -0.16574 |
| LRRC31           | -0.16584 |
| ME2              | -0.16589 |
| NUP50-DT         | -0.1659  |
| PRKY             | -0.16591 |
| AC007191.1       | -0.16592 |
| TBC1D19          | -0.16607 |
| LEPROTL1         | -0.16608 |
| AC087741.1       | -0.16612 |
| CNNM3-DT         | -0.1662  |
| ARL4C            | -0.16625 |
| CHI3L1           | -0.1664  |
| AC002070.1       | -0.1664  |
| AF186192.2       | -0.16642 |
| AATBC            | -0.16661 |
| HCK              | -0.16662 |
| GK               | -0.16664 |
| BCL2L14          | -0.16666 |
| SCLT1            | -0.16667 |

|            |          |
|------------|----------|
| EBLN3P     | -0.16677 |
| NAA16      | -0.16681 |
| DCP2       | -0.1669  |
| MXD3       | -0.16693 |
| AC010185.1 | -0.16694 |
| AL445222.1 | -0.16695 |
| SLC22A15   | -0.16695 |
| RNVU1-3    | -0.16703 |
| AP001271.1 | -0.16703 |
| APBA3      | -0.16703 |
| SCAMP1-AS1 | -0.16707 |
| CIPC       | -0.16711 |
| NSUN7      | -0.16718 |
| SARAF      | -0.16722 |
| RIPK3      | -0.16729 |
| ADAM19     | -0.16735 |
| MT-TP      | -0.16738 |
| C1S        | -0.16739 |
| PKD1P6     | -0.16743 |
| SLC35G1    | -0.16743 |
| ZGLP1      | -0.16743 |
| DDB2       | -0.16747 |
| C17orf97   | -0.1675  |
| AC124798.1 | -0.16758 |
| AC012313.5 | -0.1676  |
| GARS1-DT   | -0.16762 |
| CDC25B     | -0.16764 |
| RABEP2     | -0.16773 |
| NSMAF      | -0.16778 |
| TMEM9B-AS1 | -0.1678  |
| ZNF230     | -0.16789 |
| DDX5       | -0.16799 |
| TMSB4X     | -0.168   |
| SAP30      | -0.16804 |
| ZNF93      | -0.16811 |
| CASP8      | -0.16812 |
| TMSB4XP4   | -0.16817 |
| PRDM2      | -0.1682  |
| AC011472.1 | -0.16821 |
| EIF2AK3    | -0.16829 |
| GRAMD4     | -0.16851 |
| WDR54      | -0.16851 |
| ZNF30      | -0.16852 |
| KDM2B      | -0.16863 |
| GRK6       | -0.16869 |
| ZNF548     | -0.16885 |
| AP005899.1 | -0.16889 |
| PRR22      | -0.16892 |
| LACC1      | -0.16892 |

|             |          |
|-------------|----------|
| IFIT2       | -0.16893 |
| VWF         | -0.16896 |
| OSGEP       | -0.16898 |
| SLC1A7      | -0.16902 |
| AC020558.2  | -0.16917 |
| PM20D2      | -0.16922 |
| CES4A       | -0.16925 |
| PARP9       | -0.16925 |
| PTAR1       | -0.16925 |
| AP002807.1  | -0.16926 |
| CDK20       | -0.16926 |
| NEU3        | -0.16931 |
| ZNF160      | -0.16931 |
| RASSF9      | -0.16936 |
| AL132780.4  | -0.1694  |
| EPB41L3     | -0.16945 |
| AC135050.5  | -0.16955 |
| INPP4A      | -0.16959 |
| PCNX2       | -0.16967 |
| RN7SKP51    | -0.16972 |
| AC090517.2  | -0.16982 |
| GLI4        | -0.16987 |
| TRAPPC6B    | -0.16989 |
| ZNF234      | -0.16989 |
| HHEX        | -0.16991 |
| SLC34A2     | -0.16992 |
| AC124944.1  | -0.16997 |
| PI4KAP1     | -0.16997 |
| IFI16       | -0.17004 |
| NFATC3      | -0.17009 |
| TBX5        | -0.17011 |
| PHACTR2     | -0.17012 |
| MFSD4A      | -0.17014 |
| AC008608.2  | -0.17017 |
| TNK2        | -0.17021 |
| ZFP3        | -0.17024 |
| FAM214A     | -0.17026 |
| MIR3945HG   | -0.1703  |
| BX284668.3  | -0.17035 |
| SNORD116-4  | -0.17037 |
| MID1IP1-AS1 | -0.17039 |
| CASC19      | -0.17046 |
| LINC00920   | -0.17049 |
| LPL         | -0.17051 |
| NEMF        | -0.17053 |
| MT-ND1      | -0.17065 |
| SNORD99     | -0.17065 |
| ZNF550      | -0.17068 |
| TMX4        | -0.17079 |

|             |          |
|-------------|----------|
| RPS6KL1     | -0.17098 |
| ERICH6-AS1  | -0.17113 |
| MPC1        | -0.17114 |
| ZXDA        | -0.17117 |
| SPIRE1      | -0.1712  |
| STRADA      | -0.17123 |
| ABHD17A     | -0.17126 |
| SETBP1-DT   | -0.17127 |
| CIART       | -0.17128 |
| RASL11A     | -0.17144 |
| ANOS1       | -0.17146 |
| MAGEH1      | -0.17152 |
| VIPR1       | -0.1716  |
| RPL10P9     | -0.17161 |
| ZNF706      | -0.17161 |
| PER3        | -0.17162 |
| TLR3        | -0.17166 |
| MTERF2      | -0.17167 |
| LRIG2       | -0.17169 |
| IKZF4       | -0.17171 |
| AP005329.2  | -0.17171 |
| MUC20-OT1   | -0.17176 |
| AL031186.1  | -0.17177 |
| PCP2        | -0.17178 |
| AC006449.6  | -0.17192 |
| ADCY7       | -0.17196 |
| ZNF19       | -0.17197 |
| ZNF175      | -0.17203 |
| IYD         | -0.17205 |
| SLC25A42    | -0.17215 |
| POMK        | -0.17216 |
| MIR573      | -0.17222 |
| ALKAL2      | -0.17232 |
| LPAR5       | -0.17237 |
| AL022322.1  | -0.17242 |
| RBM11       | -0.17256 |
| ATG2B       | -0.17259 |
| ARHGAP5     | -0.17271 |
| CSPG4P10    | -0.17285 |
| RNU4ATAC18P | -0.17288 |
| PDE4DIPP6   | -0.17296 |
| RNF130      | -0.17296 |
| RBM14-RBM4  | -0.17297 |
| AC010504.1  | -0.17302 |
| AC008555.6  | -0.17304 |
| AC025178.1  | -0.17306 |
| DNASE2      | -0.17307 |
| ARHGEF15    | -0.1731  |
| PMS2P3      | -0.17312 |

|            |          |
|------------|----------|
| AC106897.1 | -0.17321 |
| ALDH3B2    | -0.17327 |
| FOXP2      | -0.17328 |
| SCAI       | -0.17329 |
| ZBTB40     | -0.17332 |
| MMP1       | -0.17334 |
| TUB        | -0.17342 |
| BEST4      | -0.1735  |
| BCAR3-AS1  | -0.17365 |
| SIRT2      | -0.17367 |
| ANGPT1     | -0.1737  |
| ZNF254     | -0.17371 |
| AC098935.1 | -0.17373 |
| ZNF724     | -0.17374 |
| RPL36AL    | -0.17375 |
| PAN3       | -0.17376 |
| AC091563.1 | -0.17377 |
| AL162377.1 | -0.17378 |
| NRL        | -0.1738  |
| P2RY1      | -0.17386 |
| ZNF571     | -0.17392 |
| TNFAIP2    | -0.17403 |
| AC087071.1 | -0.17406 |
| DICER1-AS1 | -0.17417 |
| RRAD       | -0.17422 |
| AC104463.2 | -0.17425 |
| ANKRD10    | -0.17432 |
| ZDHHC2     | -0.17433 |
| CENPT      | -0.17435 |
| ZNF750     | -0.17436 |
| TNFSF11    | -0.17439 |
| SFRP2      | -0.17445 |
| TUBE1      | -0.17446 |
| SELENOP    | -0.17449 |
| MIR6071    | -0.1746  |
| AC090425.3 | -0.17468 |
| AKAP9      | -0.1747  |
| AL035587.1 | -0.17478 |
| KLHDC7A    | -0.17482 |
| CELSR3     | -0.17488 |
| ATXN1-AS1  | -0.1749  |
| AC008764.2 | -0.17492 |
| HBA1       | -0.17499 |
| TRDC       | -0.17506 |
| SDCBP2-AS1 | -0.17509 |
| AC037459.2 | -0.17509 |
| LUC7L      | -0.17509 |
| AC007406.4 | -0.17512 |
| AC132812.1 | -0.17528 |

|            |          |
|------------|----------|
| POP4       | -0.17535 |
| EMC9       | -0.17542 |
| LIMK2      | -0.17543 |
| APOL2      | -0.17546 |
| FLVCR2     | -0.17547 |
| FLVCR1     | -0.17548 |
| AL049840.3 | -0.17559 |
| MSR1       | -0.17565 |
| ADCK1      | -0.1758  |
| ZNF25      | -0.1758  |
| SNX30      | -0.17581 |
| ZNF226     | -0.17582 |
| CD99P1     | -0.17588 |
| Z93930.2   | -0.17597 |
| ZMYND12    | -0.17597 |
| GSDMD      | -0.17602 |
| AC253576.2 | -0.17608 |
| SCUBE1     | -0.17615 |
| CFD        | -0.17618 |
| SRP54      | -0.17621 |
| INO80D     | -0.17624 |
| PPP2R3C    | -0.17633 |
| UHRF2      | -0.1764  |
| PLEKHG5    | -0.17647 |
| IKZF2      | -0.17652 |
| KLF9       | -0.17653 |
| CCDC157    | -0.17654 |
| CHIC1      | -0.17657 |
| ANKHD1     | -0.17663 |
| STAT5B     | -0.17666 |
| TGFB3      | -0.17679 |
| FMNL2      | -0.17696 |
| AC006077.2 | -0.17697 |
| LINC01816  | -0.17697 |
| ZNF736     | -0.17703 |
| DMAC2L     | -0.17707 |
| CHD7       | -0.17713 |
| RASSF1     | -0.17714 |
| GLCCI1     | -0.17738 |
| SNRK       | -0.1774  |
| APH1B      | -0.17741 |
| PHF21A     | -0.17751 |
| RRP7BP     | -0.17768 |
| CD24       | -0.1777  |
| BX470102.1 | -0.17775 |
| ECM1       | -0.17776 |
| SCD5       | -0.17782 |
| TUBB2A     | -0.17783 |
| AP001462.1 | -0.17783 |



|            |          |
|------------|----------|
| SIMC1      | -0.17785 |
| BBOX1      | -0.17787 |
| AC092171.4 | -0.17788 |
| MED14OS    | -0.17799 |
| HMCN1      | -0.17802 |
| ANXA2P1    | -0.17802 |
| CCDC14     | -0.17803 |
| AGAP6      | -0.17803 |
| NFATC4     | -0.17811 |
| DUSP28     | -0.17814 |
| MSS51      | -0.17822 |
| HACD4      | -0.17832 |
| ZFP14      | -0.17832 |
| COL16A1    | -0.17833 |
| A1BG-AS1   | -0.17835 |
| SH3BGRL    | -0.17839 |
| GIT2       | -0.17843 |
| RPS19P3    | -0.17857 |
| KDM8       | -0.17858 |
| PSPHP1     | -0.17861 |
| GUCY1A1    | -0.17863 |
| KCTD7      | -0.17867 |
| CEP83      | -0.17871 |
| STEAP4     | -0.17874 |
| TMSB4XP2   | -0.17876 |
| TRIM2      | -0.1788  |
| RIBC2      | -0.17887 |
| ZNF436-AS1 | -0.17896 |
| C8orf88    | -0.17897 |
| SELENOK    | -0.179   |
| AC253536.5 | -0.17901 |
| C2orf72    | -0.17904 |
| PAPSS2     | -0.17905 |
| NSMCE4A    | -0.17913 |
| MDN1       | -0.17916 |
| PLEKHA2    | -0.17916 |
| CLEC2B     | -0.17918 |
| SLC2A9     | -0.17918 |
| AC009237.3 | -0.17924 |
| TRAFD1     | -0.17934 |
| LNPEP      | -0.17935 |
| SLC6A20    | -0.17936 |
| KCNQ3      | -0.1794  |
| SP100      | -0.17947 |
| CLEC3B     | -0.17959 |
| CRYBB1     | -0.17961 |
| TOR3A      | -0.17967 |
| AC060780.1 | -0.17969 |
| STK19B     | -0.17969 |

|            |          |
|------------|----------|
| ATP7B      | -0.1797  |
| LINC00884  | -0.17971 |
| HLA-U      | -0.17972 |
| ACSL5      | -0.17975 |
| AC006001.3 | -0.17986 |
| ZNF594     | -0.17987 |
| RNU1-153P  | -0.17992 |
| AC002553.1 | -0.17996 |
| AC022509.2 | -0.18001 |
| SNORD124   | -0.18005 |
| HECW2      | -0.18026 |
| IDH2       | -0.18027 |
| SNORD73B   | -0.1803  |
| RPSAP70    | -0.18047 |
| SEC61A2    | -0.18048 |
| CA10       | -0.1805  |
| EMILIN2    | -0.18052 |
| USF2       | -0.18052 |
| SFTPA1     | -0.18055 |
| PALMD      | -0.18059 |
| ZNF107     | -0.18063 |
| KCNH2      | -0.18068 |
| TRIM60P18  | -0.18071 |
| AC016542.1 | -0.18073 |
| SEPTIN4    | -0.18078 |
| SDR39U1    | -0.18089 |
| POLI       | -0.18093 |
| RNF157-AS1 | -0.18098 |
| ZNF600     | -0.181   |
| LINC00265  | -0.18103 |
| CCT2       | -0.18118 |
| SLFN12     | -0.18129 |
| CPA3       | -0.1813  |
| RASA3      | -0.18131 |
| GUCY1A2    | -0.18135 |
| AC139768.1 | -0.18138 |
| CBX6       | -0.18141 |
| KCNMA1     | -0.18142 |
| AC069200.1 | -0.18143 |
| AC005046.1 | -0.18151 |
| MAPK8IP3   | -0.18151 |
| PIGL       | -0.18157 |
| PPM1N      | -0.1816  |
| CTC1       | -0.1816  |
| CCDC88A    | -0.18164 |
| HMGA1P2    | -0.18173 |
| LINC02315  | -0.18174 |
| SIRPB1     | -0.18177 |
| AC098934.1 | -0.18199 |

|            |          |
|------------|----------|
| AP003108.5 | -0.18199 |
| ARL6       | -0.18204 |
| SNHG20     | -0.18204 |
| FBF1       | -0.1822  |
| NUBPL      | -0.18221 |
| FGD5       | -0.18221 |
| IL6ST      | -0.18226 |
| AL122035.1 | -0.18238 |
| NAA30      | -0.1825  |
| PIP4P1     | -0.18254 |
| AC124045.1 | -0.18254 |
| IL15RA     | -0.18259 |
| GAL3ST4    | -0.18263 |
| SCNN1B     | -0.18265 |
| GRK5       | -0.18266 |
| FAM122C    | -0.18267 |
| RGS5       | -0.1827  |
| TMEM64     | -0.18291 |
| PRKX       | -0.18294 |
| LENG8-AS1  | -0.18299 |
| MTHFD2L    | -0.183   |
| FOXF1      | -0.18304 |
| MT-TC      | -0.18304 |
| GNPTAB     | -0.18308 |
| EML4       | -0.1831  |
| OCIAD1-AS1 | -0.1831  |
| ZNF611     | -0.18316 |
| ZNF846     | -0.18322 |
| LINC01094  | -0.18328 |
| CA11       | -0.18334 |
| PPIAP53    | -0.18335 |
| GLUL       | -0.18345 |
| STAMBPL1   | -0.18346 |
| MIR635     | -0.18347 |
| ZNF675     | -0.18351 |
| RWDD2A     | -0.18352 |
| GDF11      | -0.18364 |
| MIR762HG   | -0.1837  |
| VGF        | -0.18374 |
| SLC46A3    | -0.18385 |
| RDH10      | -0.18389 |
| SUSD6      | -0.184   |
| SGSM1      | -0.18409 |
| C10orf143  | -0.18416 |
| FKBP3      | -0.18429 |
| ARL15      | -0.18432 |
| MPZ        | -0.18437 |
| ERAP1      | -0.18453 |
| PLCXD3     | -0.18453 |

|             |          |
|-------------|----------|
| TBCEL       | -0.18456 |
| AL442663.4  | -0.18456 |
| ARSA        | -0.1846  |
| LARGE1      | -0.1846  |
| USP45       | -0.18462 |
| AC110079.1  | -0.18471 |
| LYSMD2      | -0.18484 |
| ATXN7L1     | -0.18492 |
| RNA5SP82    | -0.185   |
| MCM9        | -0.18502 |
| EP400P1     | -0.18504 |
| ABHD6       | -0.18515 |
| ZNF407      | -0.18546 |
| TBX15       | -0.18553 |
| SUMO1P3     | -0.18564 |
| GGCTP1      | -0.18567 |
| MYO9B       | -0.18574 |
| HCFC2       | -0.18584 |
| CUTALP      | -0.18587 |
| HIPK1       | -0.18588 |
| AC135050.6  | -0.18589 |
| RAPGEF4     | -0.18596 |
| PHLPP1      | -0.18597 |
| GSTA2       | -0.18604 |
| SPON2       | -0.18614 |
| UNC5C       | -0.18615 |
| OLFML1      | -0.18629 |
| ZBTB1       | -0.18629 |
| CRABP2      | -0.1863  |
| CACNA1C     | -0.1863  |
| PLPP1       | -0.18631 |
| HSD11B1-AS1 | -0.18637 |
| SEMA4A      | -0.1864  |
| ZNF586      | -0.1864  |
| CCDC130     | -0.18647 |
| AL162274.2  | -0.18655 |
| CDO1        | -0.18661 |
| TDRD9       | -0.18663 |
| ANXA6       | -0.18691 |
| AC008610.1  | -0.18706 |
| CCT6P1      | -0.18709 |
| RNASE4      | -0.1871  |
| SLFN5       | -0.18714 |
| VPS13A      | -0.1872  |
| AC020910.5  | -0.18722 |
| TNRC6C      | -0.18723 |
| TMEM255A    | -0.18732 |
| ATP1A1-AS1  | -0.18734 |
| ZBTB7C      | -0.18734 |

|            |          |
|------------|----------|
| C1R        | -0.18737 |
| RARRES2    | -0.18741 |
| MYSM1      | -0.18742 |
| TVP23C     | -0.18744 |
| MUC4       | -0.18749 |
| AC022413.1 | -0.18749 |
| PLEKHM1P1  | -0.18763 |
| AC025154.2 | -0.18766 |
| HAUS7      | -0.18769 |
| FAM167B    | -0.18776 |
| SELE       | -0.18779 |
| AOC3       | -0.18783 |
| AL031666.1 | -0.18784 |
| SLC9A5     | -0.18785 |
| RAD54B     | -0.18786 |
| FUCA1      | -0.18795 |
| BTAF1      | -0.18795 |
| AC005899.6 | -0.18808 |
| LINC01786  | -0.18812 |
| UBR5       | -0.18814 |
| ZNF57      | -0.18822 |
| FAT4       | -0.18822 |
| ZGRF1      | -0.18829 |
| CYYR1      | -0.18829 |
| SIGLEC17P  | -0.1883  |
| SUGP2      | -0.18833 |
| METTL3     | -0.18833 |
| NFIB       | -0.18835 |
| AF111167.2 | -0.18838 |
| MBLAC1     | -0.18839 |
| AC004148.1 | -0.18851 |
| SDR16C5    | -0.18857 |
| NHS        | -0.18858 |
| ZNF491     | -0.18863 |
| AL683813.1 | -0.18866 |
| DENND6B    | -0.18871 |
| NRCAM      | -0.18876 |
| RNF122     | -0.18879 |
| SEC14L1    | -0.18885 |
| MZF1       | -0.18934 |
| PRDX4      | -0.18936 |
| FBXO33     | -0.18938 |
| CDK11A     | -0.1895  |
| AP002954.1 | -0.18958 |
| MIR6757    | -0.18959 |
| AC104083.1 | -0.1896  |
| PRCP       | -0.18965 |
| LAMC1-AS1  | -0.18967 |
| STON2      | -0.18968 |

|            |          |
|------------|----------|
| AL139041.1 | -0.1898  |
| CCT6P3     | -0.18989 |
| RN7SL268P  | -0.19001 |
| SIRPA      | -0.19004 |
| TNNI2      | -0.19004 |
| AL035701.1 | -0.1901  |
| AC018628.1 | -0.19027 |
| NGF        | -0.19029 |
| CBFA2T2    | -0.19029 |
| RNU6-762P  | -0.19034 |
| DENND2D    | -0.19036 |
| RPS15AP10  | -0.19037 |
| FAM13B     | -0.19052 |
| LINC01504  | -0.1906  |
| OAS2       | -0.1906  |
| BRICD5     | -0.19061 |
| SNORD101   | -0.19062 |
| DISC1      | -0.19069 |
| DIPK1A     | -0.19073 |
| SESN3      | -0.19074 |
| ZNF396     | -0.19078 |
| ZBTB37     | -0.19126 |
| CERK       | -0.19147 |
| TRIM21     | -0.1915  |
| TAZ        | -0.1915  |
| ADAMTS1    | -0.19166 |
| MDM2       | -0.19174 |
| PVT1       | -0.19175 |
| AL033397.2 | -0.19192 |
| ZBTB24     | -0.19198 |
| MCOLN3     | -0.19199 |
| LRRC37A2   | -0.19228 |
| SMG1       | -0.1923  |
| EPHX2      | -0.19234 |
| KDM7A      | -0.1924  |
| NAAA       | -0.19252 |
| JMY        | -0.19293 |
| LANCL1-AS1 | -0.19294 |
| AC084824.5 | -0.19295 |
| TRIM66     | -0.19296 |
| RALGPS1    | -0.19303 |
| TMCC2      | -0.19315 |
| TUBA5P     | -0.19316 |
| AC068473.5 | -0.1932  |
| MIR4664    | -0.19323 |
| ARHGAP6    | -0.19336 |
| PECAM1     | -0.1934  |
| FAM86B3P   | -0.19341 |
| IFIH1      | -0.19344 |

|             |          |
|-------------|----------|
| CYB5R4      | -0.19345 |
| IGLV3-22    | -0.19351 |
| DTX3        | -0.19356 |
| AC104692.1  | -0.19358 |
| TEK         | -0.19365 |
| LAMP1       | -0.1937  |
| AL035409.1  | -0.19372 |
| FAXDC2      | -0.19382 |
| CTSC        | -0.19389 |
| AL356481.1  | -0.19391 |
| CSF1        | -0.19391 |
| AC007342.7  | -0.19395 |
| AL031719.2  | -0.19437 |
| RAB33B-AS1  | -0.19451 |
| AC012313.4  | -0.19454 |
| KIAA0040    | -0.19456 |
| ASB1        | -0.19465 |
| BAALC-AS1   | -0.19488 |
| EPB41       | -0.19504 |
| AL031714.1  | -0.19507 |
| DGUOK-AS1   | -0.19509 |
| SCG5        | -0.1951  |
| AP000442.1  | -0.19511 |
| WDR27       | -0.19521 |
| FAM184A     | -0.19528 |
| AC103706.1  | -0.1953  |
| VMAC        | -0.19533 |
| RGCC        | -0.19547 |
| LRR1        | -0.19556 |
| TAPBPL      | -0.19563 |
| ARHGEF2-AS1 | -0.19567 |
| AL390728.5  | -0.19568 |
| FBXO34      | -0.19573 |
| VSIG4       | -0.19576 |
| RSKR        | -0.19587 |
| TAS2R14     | -0.19603 |
| USP20       | -0.19605 |
| MDGA1       | -0.19608 |
| ACRBP       | -0.19609 |
| ZNF557      | -0.19621 |
| AC107375.1  | -0.19627 |
| SLC31A1     | -0.19646 |
| KMT2E-AS1   | -0.19651 |
| SYBU        | -0.19653 |
| SLC4A4      | -0.19656 |
| RNF138      | -0.19666 |
| AZIN2       | -0.19673 |
| ANGEL1      | -0.19685 |
| MIR331      | -0.1969  |

|            |          |
|------------|----------|
| F8         | -0.19713 |
| CHD6       | -0.19718 |
| PADI2      | -0.19719 |
| SIX2       | -0.1972  |
| AC011461.1 | -0.19722 |
| TMED8      | -0.19722 |
| AL590617.2 | -0.19724 |
| MT-ND5     | -0.19729 |
| E2F5       | -0.1973  |
| MIR3682    | -0.1974  |
| PRDM15     | -0.19743 |
| AL161787.1 | -0.19743 |
| COX20P1    | -0.19746 |
| TBC1D8     | -0.19751 |
| RN7SL138P  | -0.19772 |
| AC008124.1 | -0.19781 |
| AL133338.1 | -0.19786 |
| AL139260.1 | -0.19801 |
| CDC26P1    | -0.19803 |
| EMBP1      | -0.19812 |
| AC007485.2 | -0.19814 |
| CRYBG3     | -0.19821 |
| ZC2HC1A    | -0.19823 |
| BLMH       | -0.1983  |
| NAGK       | -0.19845 |
| CEP120     | -0.19856 |
| TBC1D32    | -0.19866 |
| MGAT3      | -0.19887 |
| PCBP1-AS1  | -0.19893 |
| MIR4326    | -0.19898 |
| AC145207.9 | -0.19899 |
| AC005828.6 | -0.19901 |
| ACE        | -0.19904 |
| KIAA0586   | -0.19912 |
| GAS5-AS1   | -0.19914 |
| TPM3P9     | -0.19917 |
| LIN7B      | -0.19919 |
| S1PR2      | -0.1992  |
| DENND4A    | -0.19923 |
| ZNF449     | -0.19923 |
| CCDC28A    | -0.19932 |
| CD209      | -0.19946 |
| AC010618.3 | -0.19951 |
| KLRK1-AS1  | -0.19953 |
| LIME1      | -0.1996  |
| RNF180     | -0.19963 |
| WNT4       | -0.19964 |
| CTSZ       | -0.19969 |
| AC093799.1 | -0.19972 |



|              |          |
|--------------|----------|
| TACC1        | -0.19972 |
| CERS4        | -0.19973 |
| PIKFYVE      | -0.1998  |
| SARM1        | -0.19986 |
| MIPEPP3      | -0.19987 |
| SLC12A2      | -0.19988 |
| AGMAT        | -0.19991 |
| IFNAR2       | -0.19995 |
| AC080037.1   | -0.20011 |
| LINC01124    | -0.20013 |
| ANG          | -0.20016 |
| TTC32        | -0.20018 |
| ASH1L-AS1    | -0.20021 |
| ADAMTSL4-AS2 | -0.20022 |
| ARHGAP5-AS1  | -0.20025 |
| ZNF32-AS2    | -0.20029 |
| PDCD4        | -0.20039 |
| AL353743.1   | -0.2005  |
| CDC37L1-DT   | -0.20054 |
| BCL2L2       | -0.20074 |
| ZC3H6        | -0.20092 |
| AC100854.1   | -0.20096 |
| AC000078.1   | -0.20101 |
| AC018653.3   | -0.20102 |
| HCN3         | -0.20112 |
| AC092123.1   | -0.20121 |
| SLC7A6       | -0.20125 |
| AC093890.1   | -0.20126 |
| PIAS2        | -0.20128 |
| DDO          | -0.20129 |
| GGH          | -0.20132 |
| AC021078.1   | -0.20134 |
| TNRC6B       | -0.20136 |
| CEP97        | -0.2014  |
| ZNF337       | -0.20148 |
| SUZ12P1      | -0.20151 |
| MIR3685      | -0.20157 |
| GAS6-DT      | -0.20161 |
| CHD9         | -0.20163 |
| RASL11B      | -0.20181 |
| AC009283.1   | -0.20181 |
| ZC2HC1C      | -0.2019  |
| AC074212.1   | -0.2019  |
| AL445933.1   | -0.20197 |
| LINC01936    | -0.20203 |
| SPATA6       | -0.20221 |
| AC139887.2   | -0.20223 |
| AC090152.1   | -0.20225 |
| ZSCAN5A      | -0.20239 |

|            |          |
|------------|----------|
| AC006435.2 | -0.20245 |
| PHF11      | -0.20258 |
| PDE7A      | -0.20259 |
| FCGBP      | -0.20261 |
| TXNDC15    | -0.20265 |
| SNHG14     | -0.20267 |
| PITPNC1    | -0.20272 |
| AC022400.6 | -0.20272 |
| ZNF354B    | -0.20277 |
| TTYH2      | -0.20283 |
| BMS1P1     | -0.20287 |
| VDAC1P8    | -0.20289 |
| MYO5A      | -0.20291 |
| AC008972.2 | -0.20293 |
| RNA5SP203  | -0.20298 |
| JAM2       | -0.20304 |
| AC096586.2 | -0.20306 |
| ACOXL      | -0.20309 |
| DCLK1      | -0.20314 |
| MIR4639    | -0.20314 |
| ACTR3C     | -0.20323 |
| ZNF430     | -0.20324 |
| PSME1      | -0.20325 |
| LBHD1      | -0.20339 |
| BAZ2B      | -0.20344 |
| MIR6819    | -0.20346 |
| VASH1      | -0.20359 |
| CDC42SE2   | -0.20366 |
| FAM117A    | -0.20367 |
| CSF3       | -0.20376 |
| DHX58      | -0.20379 |
| GPATCH2L   | -0.20385 |
| DRAM1      | -0.20388 |
| ZNF805     | -0.20392 |
| AGL        | -0.20395 |
| ACBD7      | -0.20404 |
| NPIP15     | -0.20418 |
| CORO2B     | -0.20431 |
| ZSCAN30    | -0.20439 |
| TCP11L2    | -0.20446 |
| LINC00685  | -0.2045  |
| TTBK2      | -0.20451 |
| AL360219.1 | -0.2046  |
| SPPL2B     | -0.20462 |
| TMX2P1     | -0.20463 |
| AC025048.2 | -0.20468 |
| CFAP251    | -0.20483 |
| LINC-PINT  | -0.20486 |
| AC004890.2 | -0.20496 |

|             |          |
|-------------|----------|
| DGLUCY      | -0.20497 |
| CGNL1       | -0.205   |
| PLXDC1      | -0.20504 |
| PDE5A       | -0.20506 |
| SPA17       | -0.20517 |
| ST8SIA6     | -0.20521 |
| FAM126B     | -0.2053  |
| DNAJC10     | -0.20533 |
| ZNF77       | -0.20536 |
| GLRX5P2     | -0.20544 |
| GSDMB       | -0.20549 |
| FOXN2       | -0.2055  |
| AC027644.1  | -0.20551 |
| GGA2        | -0.20563 |
| ERFL        | -0.20568 |
| N4BP2L2     | -0.20574 |
| PYGO1       | -0.20585 |
| AC025171.4  | -0.20587 |
| AC002563.1  | -0.20596 |
| AC073073.1  | -0.20605 |
| ZNF350      | -0.20611 |
| LIG4        | -0.20612 |
| MLKL        | -0.20612 |
| KANSL1L     | -0.20614 |
| GALNT13     | -0.20646 |
| RNU6-850P   | -0.20649 |
| AL353807.4  | -0.2066  |
| AC009237.15 | -0.20673 |
| AC129510.1  | -0.20674 |
| USP51       | -0.20674 |
| RNU6-312P   | -0.20676 |
| AMZ2P1      | -0.20681 |
| ZNF614      | -0.20687 |
| DDX47       | -0.20695 |
| WNK2        | -0.20696 |
| SPATA7      | -0.20703 |
| BHLHE41     | -0.20723 |
| DNHD1       | -0.20723 |
| BBS5        | -0.20728 |
| AC073195.1  | -0.20734 |
| SFTPA2      | -0.20739 |
| ACCS        | -0.20741 |
| AC012354.2  | -0.20748 |
| SLC25A25    | -0.20752 |
| GIPC2       | -0.20754 |
| ZNF24       | -0.20765 |
| AL022328.1  | -0.2077  |
| SERPINB9    | -0.20772 |
| ZNF506      | -0.20781 |

|             |          |
|-------------|----------|
| DOCK4       | -0.20781 |
| KIAA2026    | -0.20789 |
| RUFY3       | -0.20791 |
| SOD2        | -0.20794 |
| RNU6-343P   | -0.20798 |
| NR0B2       | -0.20802 |
| ZNF737      | -0.20804 |
| AC009090.3  | -0.20808 |
| GMDS-DT     | -0.20826 |
| AC138028.4  | -0.20828 |
| FBXO41      | -0.2083  |
| CHRD        | -0.20832 |
| RN7SL296P   | -0.20836 |
| SYT2        | -0.20839 |
| ZNF429      | -0.20846 |
| PIK3C3      | -0.20858 |
| AC011374.2  | -0.2086  |
| AC127502.2  | -0.20871 |
| DLL4        | -0.20874 |
| HERC2P2     | -0.20878 |
| CYTH1       | -0.20881 |
| GNAZ        | -0.20883 |
| CC2D2A      | -0.20887 |
| HDAC9       | -0.20895 |
| AC012676.5  | -0.20897 |
| ARIH2OS     | -0.20902 |
| CCDC183-AS1 | -0.20907 |
| FBXO48      | -0.20908 |
| ADNP-AS1    | -0.20918 |
| AL133410.1  | -0.2092  |
| GATM        | -0.20927 |
| AC010245.2  | -0.20927 |
| ARHGEF1     | -0.20933 |
| RGN         | -0.20936 |
| Z68871.1    | -0.20939 |
| ZNF791      | -0.20952 |
| PABPC1P4    | -0.20957 |
| AC055855.1  | -0.20964 |
| MIEN1       | -0.20969 |
| MT-TS2      | -0.20971 |
| PRKACB      | -0.20981 |
| L3MBTL4     | -0.20983 |
| TMEM140     | -0.20992 |
| SNORD19C    | -0.20998 |
| REPIN1-AS1  | -0.20998 |
| RNU6-531P   | -0.21001 |
| AC139795.2  | -0.21005 |
| SH2B3       | -0.21012 |
| C11orf71    | -0.21026 |

|              |          |
|--------------|----------|
| AC005911.1   | -0.21038 |
| AC005104.1   | -0.21041 |
| FLVCR1-DT    | -0.21046 |
| UBBP4        | -0.21053 |
| NAPB         | -0.21059 |
| PRPS1P2      | -0.21061 |
| ZNF267       | -0.21062 |
| DMXL1        | -0.21065 |
| MGAT2        | -0.21068 |
| AC040169.1   | -0.21069 |
| ZNF273       | -0.21071 |
| TMEM268      | -0.21078 |
| BET1-AS1     | -0.21085 |
| AC132872.1   | -0.21085 |
| AC025165.4   | -0.21092 |
| AC141002.1   | -0.21103 |
| FHL5         | -0.21109 |
| KL           | -0.21119 |
| AL604028.2   | -0.21121 |
| HAGLR        | -0.21123 |
| AL359183.1   | -0.21126 |
| TBX2-AS1     | -0.21143 |
| SYNGAP1      | -0.21152 |
| HERC6        | -0.21156 |
| ZNF431       | -0.21171 |
| RTTN         | -0.21172 |
| BIRC7        | -0.21175 |
| CCN4         | -0.21175 |
| ZNF253       | -0.21178 |
| ZNF44        | -0.21188 |
| AP001628.1   | -0.21193 |
| SLC25A25-AS1 | -0.21203 |
| PHC3         | -0.21215 |
| ARRB2        | -0.21216 |
| RNU6-282P    | -0.21224 |
| ABCA1        | -0.2123  |
| CHROMR       | -0.2123  |
| TATDN2P2     | -0.21241 |
| AC020917.4   | -0.21247 |
| IFIT1        | -0.21248 |
| AC019131.2   | -0.21253 |
| EPB41L2      | -0.21254 |
| GNAL         | -0.21254 |
| AC015912.3   | -0.21259 |
| ADCY10P1     | -0.21264 |
| ZNF333       | -0.21265 |
| TTC28        | -0.21269 |
| AC124944.2   | -0.21275 |
| AC133963.1   | -0.21281 |

|            |          |
|------------|----------|
| TCF4       | -0.21282 |
| AC234775.2 | -0.21287 |
| EFR3B      | -0.21287 |
| KLHDC9     | -0.21298 |
| ZNF563     | -0.213   |
| GPHN       | -0.21304 |
| LRRC6      | -0.21321 |
| LINC00909  | -0.21324 |
| SERGEF     | -0.21334 |
| AL391244.1 | -0.21343 |
| ZFP36L2    | -0.21357 |
| AC060780.2 | -0.21358 |
| RCAN2      | -0.21359 |
| RNF213     | -0.21361 |
| CEP19      | -0.21374 |
| LINC01740  | -0.21375 |
| AC073575.2 | -0.21378 |
| ARHGAP33   | -0.2138  |
| RPL32P3    | -0.21382 |
| AL596325.2 | -0.21393 |
| CCDC159    | -0.21396 |
| AL121832.2 | -0.21396 |
| AC133552.2 | -0.21398 |
| AL139011.1 | -0.21402 |
| SAT1       | -0.2142  |
| AC021851.1 | -0.21444 |
| MIR4668    | -0.21446 |
| C17orf67   | -0.21461 |
| DNAJC3-DT  | -0.2147  |
| AF274858.1 | -0.21488 |
| LINC02100  | -0.2149  |
| KCNJ11     | -0.2151  |
| SPTB       | -0.21515 |
| POMC       | -0.21518 |
| AC060766.6 | -0.21521 |
| FGF14-AS2  | -0.21527 |
| TPTEP2     | -0.21536 |
| LDB2       | -0.21547 |
| NPHP3      | -0.21549 |
| SLC37A2    | -0.21561 |
| CENPC      | -0.21564 |
| RND1       | -0.21567 |
| ZNF224     | -0.21568 |
| AP003392.1 | -0.21572 |
| OXNAD1     | -0.21572 |
| AP000346.2 | -0.21574 |
| ARRDC2     | -0.21576 |
| TIGD3      | -0.21587 |
| DFFB       | -0.2159  |

|                    |          |
|--------------------|----------|
| SERPINF2           | -0.21592 |
| LINC01315          | -0.21593 |
| AC006942.1         | -0.21593 |
| AC007541.1         | -0.21601 |
| PHBP9              | -0.2162  |
| C2                 | -0.21623 |
| CRACR2A            | -0.21635 |
| MACROD2            | -0.21641 |
| BACH2              | -0.21648 |
| ZNF169             | -0.21653 |
| APLP1              | -0.2166  |
| DZANK1             | -0.21664 |
| DDX43              | -0.2167  |
| KIFC2              | -0.21671 |
| RPL5P30            | -0.21676 |
| SNORD1B            | -0.21678 |
| GPD1               | -0.21681 |
| AC096992.2         | -0.21702 |
| SPAG1              | -0.21703 |
| KBTBD12            | -0.21704 |
| ARG2               | -0.21713 |
| TAP2               | -0.21722 |
| AL138831.3         | -0.21726 |
| RAP2A              | -0.21733 |
| FAM221A            | -0.21735 |
| MTRNR2L1           | -0.21738 |
| PARP10             | -0.2174  |
| AL031709.1         | -0.21758 |
| PIP4K2A            | -0.21773 |
| AL357079.1         | -0.21774 |
| LINC00894          | -0.21775 |
| DNAJB9             | -0.21776 |
| POU6F1             | -0.21777 |
| CLN8               | -0.21786 |
| GIN52              | -0.21788 |
| AC010761.1         | -0.21789 |
| FMNL1              | -0.21792 |
| ZFAND4             | -0.21796 |
| AP4S1              | -0.21803 |
| GCNT4              | -0.21815 |
| TXLNGY             | -0.2182  |
| LCA5               | -0.21823 |
| BAIAP2L2           | -0.21832 |
| KLHL3              | -0.21833 |
| POLE2              | -0.21833 |
| SAP30-DT           | -0.21836 |
| DENND1C            | -0.21846 |
| ARHGAP27P1-BPTFP1- | -0.21855 |
| KPNA2P3            |          |

|               |          |
|---------------|----------|
| IQCD          | -0.21856 |
| RPL23AP18     | -0.21857 |
| ZNF763        | -0.2186  |
| AL442125.2    | -0.21864 |
| CH17-340M24.3 | -0.21879 |
| UTRN          | -0.21886 |
| AC090589.3    | -0.21886 |
| TRIM68        | -0.21891 |
| ZNF275        | -0.21896 |
| JAM3          | -0.219   |
| FZD3          | -0.21911 |
| IRAK4         | -0.21914 |
| RNU6-431P     | -0.2192  |
| PCF11         | -0.2192  |
| ABCA3         | -0.2192  |
| AC010186.2    | -0.21924 |
| ALOX5         | -0.2193  |
| DPYD          | -0.21937 |
| STIM1-AS1     | -0.21959 |
| CARF          | -0.2196  |
| AL513534.1    | -0.2197  |
| PTAFR         | -0.21973 |
| GOLGA2P5      | -0.21992 |
| PSMB8         | -0.22    |
| RIC1          | -0.22001 |
| LRRC37B       | -0.22012 |
| AL132800.1    | -0.22022 |
| SEPTIN7P14    | -0.22029 |
| LIFR          | -0.22051 |
| MAST3         | -0.22059 |
| PPM1L         | -0.2207  |
| PXK           | -0.22086 |
| LIPE          | -0.22094 |
| MIR616        | -0.22097 |
| FAM20A        | -0.22108 |
| NBPF12        | -0.22114 |
| SETX          | -0.22121 |
| ZNF529        | -0.22126 |
| BAZ1A         | -0.22135 |
| DMTF1         | -0.22143 |
| AQP7          | -0.22145 |
| PLCH2         | -0.22152 |
| LINC01176     | -0.22168 |
| RN7SL809P     | -0.22194 |
| AC124319.1    | -0.22198 |
| RAPGEF1       | -0.22201 |
| RASA2         | -0.22206 |
| MBIP          | -0.22218 |
| AC116407.1    | -0.22219 |



|             |          |
|-------------|----------|
| SLFN13      | -0.22222 |
| C19orf12    | -0.22226 |
| TMEM147-AS1 | -0.22227 |
| AC108860.2  | -0.22228 |
| FUOM        | -0.22232 |
| MRC1        | -0.22233 |
| AC026471.4  | -0.22234 |
| CYRIA       | -0.22244 |
| TUBGCP6     | -0.22245 |
| ARGLU1      | -0.2226  |
| EIF4E3      | -0.2226  |
| AC000123.3  | -0.2227  |
| AC013403.2  | -0.22275 |
| AC010197.1  | -0.22278 |
| AC026369.3  | -0.2228  |
| ZNF681      | -0.22293 |
| SLC6A12     | -0.22297 |
| RPL10P13    | -0.22306 |
| AC073107.2  | -0.22306 |
| CAPN10-DT   | -0.22324 |
| ZNF432      | -0.22346 |
| HLA-DRB9    | -0.22351 |
| LTB4R       | -0.22353 |
| CLUHP3      | -0.22355 |
| ZNF841      | -0.22361 |
| SLC5A9      | -0.22369 |
| ZRSR2       | -0.2237  |
| FGFBP3      | -0.22374 |
| SYNE4       | -0.22379 |
| ANKMY1      | -0.22387 |
| KIF24       | -0.22391 |
| TPK1        | -0.22394 |
| ZNF56       | -0.22397 |
| EPM2A       | -0.22401 |
| AC008496.2  | -0.22401 |
| SOX21       | -0.22403 |
| SGK1        | -0.22405 |
| IL11RA      | -0.22414 |
| CCRL2       | -0.22416 |
| ZNF136      | -0.22417 |
| XCL1        | -0.2242  |
| HS3ST1      | -0.22435 |
| DOK5        | -0.22436 |
| ACYP1       | -0.22464 |
| TIAF1       | -0.22467 |
| MAGI2-AS3   | -0.2247  |
| PDZRN3      | -0.2248  |
| AC011481.1  | -0.22482 |
| ASPHD2      | -0.22485 |

|            |          |
|------------|----------|
| ABCC6P2    | -0.22487 |
| EME2       | -0.22492 |
| SLC25A35   | -0.22496 |
| FCRLB      | -0.22504 |
| COCH       | -0.22517 |
| SCN4B      | -0.22518 |
| C20orf96   | -0.22521 |
| ZNF767P    | -0.22521 |
| ACTA2-AS1  | -0.22525 |
| AP001033.2 | -0.22537 |
| AC105118.1 | -0.22539 |
| AC015849.3 | -0.22545 |
| SORL1      | -0.22557 |
| QRSL1      | -0.22558 |
| SMPDL3A    | -0.22564 |
| AC008972.1 | -0.22569 |
| GPR84      | -0.22572 |
| AL138921.2 | -0.22575 |
| CEP162     | -0.22583 |
| GLIPR1     | -0.22588 |
| HNRNPCP1   | -0.22588 |
| SH3BP1     | -0.22605 |
| AC079684.1 | -0.22607 |
| GAB2       | -0.22614 |
| SCIN       | -0.22619 |
| AC242426.2 | -0.22621 |
| AP001160.1 | -0.22633 |
| GSAP       | -0.22634 |
| SLFN11     | -0.22635 |
| CNKSR3     | -0.22638 |
| UBE2Q2P2   | -0.22641 |
| ATP6V1B2   | -0.22674 |
| ZNF296     | -0.22675 |
| RNF207     | -0.2268  |
| ADAP2      | -0.22682 |
| AKT3       | -0.22688 |
| ZNF236     | -0.22691 |
| FUT8       | -0.22699 |
| AC022098.1 | -0.22704 |
| MAF        | -0.22717 |
| AC135050.3 | -0.22718 |
| CRISPLD2   | -0.22718 |
| LMO2       | -0.22726 |
| AC022400.4 | -0.2273  |
| PTGIR      | -0.22734 |
| ZDHC14     | -0.22734 |
| SGTB       | -0.22736 |
| ARHGAP26   | -0.22758 |
| VIM-AS1    | -0.2276  |

|             |          |
|-------------|----------|
| GZMM        | -0.22769 |
| RPL10P19    | -0.22781 |
| DDX17       | -0.22782 |
| ZNF782      | -0.22803 |
| RBM38       | -0.22818 |
| HLA-J       | -0.22827 |
| TMEM154     | -0.22839 |
| APOBR       | -0.22843 |
| AC079907.1  | -0.22853 |
| NUP210      | -0.22861 |
| TSPYL2      | -0.22869 |
| SRSF5       | -0.22874 |
| SNORA59A    | -0.22874 |
| AC003102.1  | -0.22892 |
| PARP8       | -0.229   |
| MIR27A      | -0.22904 |
| CACHD1      | -0.22909 |
| LINC01534   | -0.2291  |
| AL162413.1  | -0.22915 |
| KLHL11      | -0.22932 |
| NFAT5       | -0.22946 |
| ZBTB18      | -0.22954 |
| RELCH       | -0.22961 |
| KRT23       | -0.22964 |
| ZNF83       | -0.22968 |
| NBPF8       | -0.2299  |
| RAB29       | -0.22995 |
| WASIR2      | -0.23003 |
| BATF        | -0.23008 |
| ZNF662      | -0.23017 |
| AC022497.1  | -0.23025 |
| STARD8      | -0.23033 |
| HOOK3       | -0.23042 |
| AC006017.1  | -0.23057 |
| CIBAR1      | -0.23068 |
| IRF5        | -0.23069 |
| AL442224.1  | -0.23072 |
| TEP1        | -0.23073 |
| FAM118A     | -0.23092 |
| KLHL28      | -0.23097 |
| RHEBL1      | -0.23102 |
| SNORA11F    | -0.23119 |
| CCL8        | -0.2312  |
| ZNF397      | -0.23127 |
| TNIP3       | -0.2315  |
| SYNE2       | -0.23164 |
| NDUFV2-AS1  | -0.23169 |
| AC011503.2  | -0.23175 |
| RPS6KA2-IT1 | -0.23178 |

|            |          |
|------------|----------|
| GPR68      | -0.23185 |
| RNU6-1095P | -0.23198 |
| AC139769.3 | -0.23205 |
| KANTR      | -0.23207 |
| RALGDS     | -0.23207 |
| PSIP1      | -0.23207 |
| CYP4V2     | -0.2321  |
| DNM3OS     | -0.23221 |
| AL928654.2 | -0.23222 |
| GOLGA8B    | -0.23225 |
| ACAA2      | -0.23226 |
| AL645929.1 | -0.23227 |
| NPIPP1     | -0.23229 |
| RGS17      | -0.23233 |
| FAM53B     | -0.23239 |
| GPS2       | -0.23243 |
| CROCC      | -0.2325  |
| CHMP4A     | -0.23254 |
| AC092803.1 | -0.23281 |
| SNORD14A   | -0.2329  |
| AL358472.2 | -0.23307 |
| AL132780.1 | -0.23317 |
| TAL1       | -0.23318 |
| ZNF292     | -0.23337 |
| FCHSD1     | -0.23362 |
| HIVEP3     | -0.23366 |
| WASH7P     | -0.23368 |
| AP000766.1 | -0.23373 |
| AC108010.1 | -0.23376 |
| TMC5       | -0.23382 |
| PHF8       | -0.23387 |
| ASLP1      | -0.2339  |
| RABGAP1L   | -0.23398 |
| NLRC4      | -0.23409 |
| CCL24      | -0.23411 |
| SPAG4      | -0.23412 |
| AC018752.1 | -0.23423 |
| USP27X     | -0.23432 |
| NIM1K      | -0.23434 |
| AP000553.2 | -0.23445 |
| AL049838.1 | -0.2345  |
| XKRX       | -0.23452 |
| AC024075.1 | -0.23469 |
| CYP27B1    | -0.2347  |
| DUSP1      | -0.23475 |
| AC079414.3 | -0.23487 |
| FRG1HP     | -0.23502 |
| AC024558.1 | -0.23503 |
| HERC2P7    | -0.23506 |

|            |          |
|------------|----------|
| GASK1A     | -0.23512 |
| TNFAIP8L1  | -0.23514 |
| AC024075.3 | -0.23515 |
| TXNDC11    | -0.23515 |
| HEATR5A    | -0.23519 |
| BRD9P2     | -0.23521 |
| AC005837.3 | -0.23542 |
| AC022211.1 | -0.2355  |
| AL022328.2 | -0.23557 |
| AC120114.3 | -0.23566 |
| CST2       | -0.23572 |
| ADGRE1     | -0.23602 |
| PRORS1P    | -0.23603 |
| SLC46A2    | -0.23607 |
| ALKBH6     | -0.23608 |
| HMG1A1P4   | -0.23612 |
| LRIG1      | -0.23612 |
| IFIT3      | -0.23613 |
| CDKN2C     | -0.23629 |
| AC022916.1 | -0.2363  |
| EXOG       | -0.23633 |
| ATF7-NPFF  | -0.23636 |
| RSAD2      | -0.23639 |
| KLHDC4     | -0.23639 |
| AL138976.2 | -0.2364  |
| CAVIN2     | -0.23651 |
| TBXAS1     | -0.23652 |
| AC015961.2 | -0.23654 |
| GDAP1      | -0.23665 |
| ADGRE3     | -0.23671 |
| CLIP3      | -0.23676 |
| NPM1P26    | -0.23683 |
| DYRK4      | -0.23684 |
| AC011498.6 | -0.23687 |
| LINC01348  | -0.23689 |
| PPM1M      | -0.23712 |
| ZNF385A    | -0.23735 |
| TTC14      | -0.23765 |
| ZNF731P    | -0.23789 |
| AC010273.3 | -0.23808 |
| BTG1       | -0.23823 |
| ZFYVE28    | -0.23823 |
| RNU6-930P  | -0.23825 |
| ZNF276     | -0.23827 |
| FOLR3      | -0.23831 |
| LRCH2      | -0.23831 |
| RAMP1      | -0.23853 |
| AC090772.4 | -0.23858 |
| DDX60      | -0.23872 |

|             |          |
|-------------|----------|
| FAM177A1    | -0.23876 |
| CCNL1       | -0.23888 |
| SMCHD1      | -0.23892 |
| AC004816.1  | -0.23894 |
| NAALADL1    | -0.23904 |
| TAF4B       | -0.23906 |
| AC012065.2  | -0.23911 |
| FNBP4       | -0.23912 |
| RPL37P12    | -0.23914 |
| ATF3        | -0.23915 |
| AC007066.2  | -0.23922 |
| PIP5K1B     | -0.23932 |
| AC010168.2  | -0.23932 |
| AC011290.2  | -0.23936 |
| SCAT2       | -0.23941 |
| FBXO10      | -0.2395  |
| RAB30-DT    | -0.23954 |
| ARHGAP18    | -0.23963 |
| HGF         | -0.23973 |
| AC078846.1  | -0.23976 |
| DUX4L50     | -0.24017 |
| AC027796.2  | -0.24022 |
| MIR554      | -0.24028 |
| LENG8       | -0.24034 |
| SNRPGP15    | -0.24036 |
| TMEM198     | -0.24038 |
| HSPBAP1     | -0.24038 |
| MMP25-AS1   | -0.24051 |
| SNORD83A    | -0.24053 |
| ANKRD10-IT1 | -0.24064 |
| AL121949.2  | -0.2408  |
| DGKH        | -0.24085 |
| PADI1       | -0.24086 |
| PLN         | -0.24092 |
| LRRC23      | -0.24106 |
| ZNF613      | -0.24117 |
| MT-TY       | -0.2412  |
| RAB8B       | -0.24124 |
| SOCS4       | -0.24148 |
| DCK         | -0.24175 |
| SUCNR1      | -0.24189 |
| VPS13B      | -0.24191 |
| SNHG10      | -0.24207 |
| AC008267.2  | -0.24229 |
| UBE3D       | -0.24236 |
| STK17B      | -0.24244 |
| MED8-AS1    | -0.24245 |
| AC004982.1  | -0.24248 |
| ZNF426-DT   | -0.24248 |

|            |          |
|------------|----------|
| C4orf19    | -0.24248 |
| AC011815.3 | -0.24271 |
| AP001107.9 | -0.24272 |
| TCEANC     | -0.24283 |
| AC008555.4 | -0.24284 |
| TMCO3      | -0.24288 |
| MCUB       | -0.24292 |
| HNF4G      | -0.24295 |
| SRD5A3-AS1 | -0.24296 |
| MARK1      | -0.24297 |
| SHISA2     | -0.24305 |
| MOXD1      | -0.24307 |
| LINC00641  | -0.24309 |
| CTBP1-AS   | -0.24331 |
| AL133243.2 | -0.24332 |
| SHFL       | -0.24338 |
| RN7SL181P  | -0.24352 |
| LINC00106  | -0.24368 |
| LINC02062  | -0.24387 |
| RPL28P2    | -0.24392 |
| CCDC102B   | -0.24405 |
| SCTR-AS1   | -0.2441  |
| TMOD2      | -0.24414 |
| CCL20      | -0.24419 |
| AC017104.1 | -0.2442  |
| RNU6-1099P | -0.24421 |
| MDM4       | -0.24421 |
| FAM149A    | -0.24424 |
| PCP4L1     | -0.24432 |
| AC027277.2 | -0.24441 |
| MIR378G    | -0.24467 |
| CREBRF     | -0.2447  |
| FAM193B    | -0.24472 |
| LINC00921  | -0.24479 |
| KANK3      | -0.24485 |
| GSTM2      | -0.24487 |
| IL10RB-DT  | -0.24494 |
| CD300LB    | -0.24496 |
| ADAT2      | -0.24499 |
| AC009120.1 | -0.24501 |
| PSME2P2    | -0.24505 |
| AC074032.1 | -0.24508 |
| NRIP2      | -0.24517 |
| WDR88      | -0.24535 |
| AC009237.8 | -0.24537 |
| NEK11      | -0.24537 |
| ROBO1      | -0.2454  |
| PTPRB      | -0.24545 |
| SSH2       | -0.24558 |

|            |          |
|------------|----------|
| MAMDC2     | -0.24569 |
| TMEM131L   | -0.24572 |
| ALPK1      | -0.24573 |
| AC127024.5 | -0.24581 |
| CROCCP2    | -0.24594 |
| AL122035.2 | -0.24606 |
| CPT1B      | -0.24612 |
| AC133134.1 | -0.24624 |
| FOLR2      | -0.24632 |
| AC015726.1 | -0.24664 |
| GCA        | -0.24678 |
| MERTK      | -0.24682 |
| PIF1       | -0.24687 |
| PAXBP1-AS1 | -0.24689 |
| CMPK2      | -0.24691 |
| MIR5587    | -0.24699 |
| PARP11     | -0.24714 |
| HS3ST5     | -0.24714 |
| LINC00649  | -0.24727 |
| ZCCHC2     | -0.2473  |
| UTP20      | -0.2475  |
| ACSS2      | -0.24753 |
| ANKRD61    | -0.24755 |
| PCID2      | -0.24779 |
| LINC01355  | -0.24787 |
| SNORD12B   | -0.24792 |
| AL671277.1 | -0.24803 |
| MIR378J    | -0.24804 |
| WDR7       | -0.24813 |
| ID2        | -0.24819 |
| AC103702.2 | -0.24833 |
| MAN2B1     | -0.24843 |
| SP4        | -0.24847 |
| MICU3      | -0.24848 |
| HECW2-AS1  | -0.24856 |
| AL162724.2 | -0.24857 |
| AC008735.4 | -0.24865 |
| JAZF1      | -0.24868 |
| SHLD1      | -0.24875 |
| HOXB4      | -0.24877 |
| SPACA9     | -0.24887 |
| ADRA2A     | -0.24899 |
| SMIM15P2   | -0.24901 |
| AC018665.1 | -0.24911 |
| AC138956.2 | -0.24913 |
| PASK       | -0.24942 |
| ULK4       | -0.24942 |
| AC087222.1 | -0.2496  |
| SLIT2      | -0.24986 |



|            |          |
|------------|----------|
| CETP       | -0.25    |
| AL354733.3 | -0.25005 |
| AC117503.2 | -0.25015 |
| AL513550.1 | -0.25042 |
| UTY        | -0.25062 |
| SRCIN1     | -0.25067 |
| SPESP1     | -0.25071 |
| RNU6-1223P | -0.25072 |
| ZNF182     | -0.25074 |
| SERPING1   | -0.25096 |
| LINC00115  | -0.25103 |
| PTGER2     | -0.25107 |
| AC004540.2 | -0.25124 |
| AC012186.2 | -0.25129 |
| AC073548.1 | -0.25131 |
| EPHA3      | -0.25141 |
| PAEP       | -0.25142 |
| CDH17      | -0.25148 |
| ATP1B2     | -0.25158 |
| CCDC74A    | -0.25181 |
| YEATS4     | -0.25194 |
| AC104564.3 | -0.25225 |
| AC025171.2 | -0.25231 |
| PLEKHF1    | -0.25266 |
| UBR5-AS1   | -0.25269 |
| PLCB1      | -0.25274 |
| ISG20      | -0.25276 |
| ST3GAL6    | -0.25277 |
| TRIM52     | -0.25285 |
| PRPF39     | -0.25286 |
| ARHGEF38   | -0.25291 |
| AC026124.2 | -0.25292 |
| MILR1      | -0.25308 |
| CFAP221    | -0.25315 |
| ABCA8      | -0.25336 |
| RNF126P1   | -0.2534  |
| RABL2A     | -0.25341 |
| GOLGA6L9   | -0.25342 |
| NFATC1     | -0.25371 |
| SENP7      | -0.25377 |
| SLC4A11    | -0.2539  |
| KLHDC1     | -0.25393 |
| CRLF3      | -0.25394 |
| AC002553.2 | -0.254   |
| LIX1L      | -0.25414 |
| SPARCL1    | -0.25437 |
| AC005077.4 | -0.25441 |
| RBM6       | -0.25459 |
| AC139887.4 | -0.25469 |

|            |          |
|------------|----------|
| MAP3K1     | -0.25476 |
| PSME2P1    | -0.25478 |
| S100A5     | -0.25487 |
| ADPRH      | -0.25491 |
| NFYC-AS1   | -0.25498 |
| DNAL1      | -0.255   |
| PPP1R14D   | -0.25506 |
| AC018521.6 | -0.25533 |
| AC004801.2 | -0.25536 |
| NOD2       | -0.2554  |
| AP1G2      | -0.25548 |
| LINC01063  | -0.25553 |
| AC005831.1 | -0.25556 |
| CFL1P5     | -0.25558 |
| ATP8B2     | -0.25563 |
| PCNX1      | -0.25569 |
| TMEM86A    | -0.25571 |
| NXF3       | -0.25577 |
| AL024508.1 | -0.25585 |
| CA5B       | -0.2559  |
| SYTL3      | -0.25592 |
| PRSS12     | -0.25606 |
| H1-10-AS1  | -0.25618 |
| ARID4A     | -0.25629 |
| LINC01876  | -0.25631 |
| SH2D2A     | -0.25632 |
| MSL3       | -0.25633 |
| APOBEC3C   | -0.25649 |
| SNORD6     | -0.25667 |
| CFLAR      | -0.25687 |
| ZNF582-AS1 | -0.25698 |
| FCHSD2     | -0.2571  |
| PAIP2B     | -0.25711 |
| NIBAN1     | -0.25717 |
| SNORD69    | -0.25723 |
| AC135983.2 | -0.25729 |
| HCAR3      | -0.25736 |
| AQP4       | -0.2574  |
| ARMH4      | -0.25741 |
| AC090579.1 | -0.25751 |
| SLC26A2    | -0.25752 |
| RFX5       | -0.25765 |
| STK32A-AS1 | -0.2578  |
| AFG3L1P    | -0.25786 |
| SLC16A10   | -0.25796 |
| FHL1       | -0.25801 |
| EFCC1      | -0.25803 |
| CASP10     | -0.25813 |
| TLE4       | -0.25822 |

|            |          |
|------------|----------|
| AL137779.2 | -0.25832 |
| SNORD72    | -0.25837 |
| C21orf58   | -0.2584  |
| ZNF441     | -0.25848 |
| AC022150.4 | -0.25853 |
| SERPINF1   | -0.25869 |
| AC008735.2 | -0.25881 |
| CHN2       | -0.259   |
| MST1L      | -0.25912 |
| BCL11A     | -0.25917 |
| PCM1       | -0.25923 |
| LINC02185  | -0.25928 |
| DNAAF4     | -0.25935 |
| PALD1      | -0.25946 |
| ACY3       | -0.25949 |
| CA4        | -0.25949 |
| AC114495.2 | -0.25958 |
| RNA5SP311  | -0.25986 |
| AL137003.1 | -0.25995 |
| CD14       | -0.25996 |
| ZNF738     | -0.25998 |
| AC024060.2 | -0.26034 |
| AL157392.3 | -0.26039 |
| ZNF460-AS1 | -0.26069 |
| RGS11      | -0.26092 |
| AC010615.1 | -0.261   |
| AL354766.2 | -0.26113 |
| LINC00324  | -0.26115 |
| AC009053.1 | -0.26125 |
| RNU5B-2P   | -0.26157 |
| PLEKHF2    | -0.26161 |
| CYP2U1     | -0.26166 |
| EMB        | -0.26172 |
| SOX21-AS1  | -0.26175 |
| RNF19A     | -0.262   |
| AC087752.4 | -0.262   |
| MEIS1      | -0.26203 |
| PGAP1      | -0.26208 |
| FAM13C     | -0.26229 |
| ABCC6P1    | -0.26243 |
| PTP4A3     | -0.26247 |
| MGP        | -0.26252 |
| CHKB       | -0.26252 |
| CHP1P2     | -0.26263 |
| RAD51-AS1  | -0.26267 |
| RPS12P3    | -0.26283 |
| AL391988.1 | -0.26294 |
| MIR27B     | -0.26294 |
| AC003070.1 | -0.26301 |

|            |          |
|------------|----------|
| AP001528.2 | -0.2631  |
| WVOX       | -0.26329 |
| MIR4520-1  | -0.26349 |
| APOL4      | -0.26357 |
| AC090607.2 | -0.26363 |
| ERN1       | -0.26369 |
| PRR5L      | -0.26376 |
| DUOX1      | -0.26422 |
| IRF2-DT    | -0.26434 |
| SPRR2F     | -0.2644  |
| EXPH5      | -0.26445 |
| IRAK1BP1   | -0.26475 |
| FAM111A    | -0.26491 |
| PINLYP     | -0.26498 |
| AL117336.1 | -0.26503 |
| H2AC9P     | -0.26513 |
| IFITM1     | -0.26522 |
| ANKRD29    | -0.26525 |
| ZNF671     | -0.26526 |
| SPNS3      | -0.26555 |
| AC005021.1 | -0.2657  |
| COA6-AS1   | -0.26573 |
| AC067852.3 | -0.2658  |
| ZFAT       | -0.26601 |
| TRMT10B    | -0.26626 |
| SOS1-IT1   | -0.26636 |
| IFI27      | -0.26654 |
| CCR1       | -0.26657 |
| ZNF852     | -0.26678 |
| KIAA1328   | -0.26679 |
| TLR2       | -0.26692 |
| EP300-AS1  | -0.26695 |
| RTCA-AS1   | -0.26729 |
| ODC1-DT    | -0.26732 |
| AC060766.3 | -0.26742 |
| DLL1       | -0.26744 |
| MAPRE2     | -0.26751 |
| BATF2      | -0.26752 |
| TCN2       | -0.26753 |
| AL365436.3 | -0.26765 |
| TEX9       | -0.2677  |
| NR5A2      | -0.26794 |
| AC055720.2 | -0.26806 |
| SDK1       | -0.2681  |
| AP000866.5 | -0.26811 |
| NMNAT2     | -0.26818 |
| FAM185BP   | -0.26824 |
| CD164L2    | -0.26831 |
| AC006128.1 | -0.26834 |

|             |          |
|-------------|----------|
| GK-AS1      | -0.26835 |
| TMED6       | -0.26837 |
| OSCP1       | -0.26852 |
| AC008982.2  | -0.26863 |
| SEMA3F-AS1  | -0.26869 |
| GCNT1       | -0.2688  |
| AL691432.1  | -0.26887 |
| ZNF43       | -0.26894 |
| TSNARE1     | -0.26898 |
| AL109918.1  | -0.26907 |
| NBEAL1      | -0.26911 |
| GIHCG       | -0.26915 |
| SIGLEC9     | -0.26922 |
| TP73        | -0.26935 |
| ASTN2       | -0.26939 |
| THUMPD3-AS1 | -0.26953 |
| LRRC56      | -0.26958 |
| PHYKPL      | -0.26998 |
| SGCA        | -0.27009 |
| CYBA        | -0.2702  |
| SNHG26      | -0.27023 |
| AC113410.1  | -0.27036 |
| AC004908.3  | -0.27067 |
| TRPM2       | -0.27082 |
| AL136295.7  | -0.27084 |
| ANO9        | -0.27087 |
| AC005253.1  | -0.27096 |
| CCDC66      | -0.27098 |
| AL049844.2  | -0.27119 |
| AP001107.4  | -0.27128 |
| TIFA        | -0.27132 |
| PIEZO2      | -0.27133 |
| SNORD62B    | -0.27138 |
| ANKAR       | -0.27153 |
| MIR3125     | -0.27167 |
| TBC1D9      | -0.27172 |
| LXN         | -0.27187 |
| SUGT1P3     | -0.27196 |
| AC123595.1  | -0.27219 |
| PARP14      | -0.27237 |
| BTN2A3P     | -0.27242 |
| HERC2P9     | -0.27254 |
| HLA-W       | -0.27272 |
| CCDC18      | -0.27282 |
| MIR3174     | -0.27299 |
| AC108673.2  | -0.273   |
| U2AF1L4     | -0.27312 |
| SNORA33     | -0.27324 |
| AC012511.1  | -0.27342 |

|            |          |
|------------|----------|
| AC245060.2 | -0.27347 |
| ARHGAP45   | -0.27353 |
| AC011477.1 | -0.27354 |
| SYT11      | -0.2736  |
| KIF27      | -0.27364 |
| AL513327.1 | -0.27379 |
| ATP1A3     | -0.27382 |
| CEACAM6    | -0.27385 |
| PROCA1     | -0.27387 |
| AC147067.2 | -0.274   |
| HLA-A      | -0.27404 |
| ZNF90      | -0.27412 |
| RIPPLY3    | -0.27418 |
| PCK2       | -0.27419 |
| AP000873.1 | -0.27427 |
| USHBP1     | -0.27432 |
| DCUN1D2    | -0.27434 |
| SPINK5     | -0.27435 |
| AC002550.2 | -0.27448 |
| AC130650.2 | -0.27451 |
| SUGT1-DT   | -0.27456 |
| AC112722.1 | -0.27457 |
| CD163L1    | -0.27475 |
| ZNF81      | -0.27475 |
| FOXN3      | -0.27515 |
| SLC6A16    | -0.27516 |
| ZNF775     | -0.27526 |
| AC079467.1 | -0.27526 |
| BCRP3      | -0.27528 |
| INE1       | -0.27528 |
| SLC19A2    | -0.27531 |
| CNTD1      | -0.27533 |
| KDM4C      | -0.27534 |
| GTF2IP14   | -0.27541 |
| ARHGDIB    | -0.27568 |
| AC095057.3 | -0.27574 |
| C3orf70    | -0.27583 |
| EYA2       | -0.27586 |
| AL121772.3 | -0.27588 |
| SEL1L3     | -0.27593 |
| SLC43A1    | -0.276   |
| IGBP1-AS1  | -0.27606 |
| PRKCQ-AS1  | -0.27617 |
| TREM2      | -0.27627 |
| AL359921.1 | -0.27632 |
| HSD17B13   | -0.27633 |
| TOX2       | -0.27653 |
| FAM13A-AS1 | -0.27654 |
| RAI2       | -0.27657 |

|            |          |
|------------|----------|
| ACACB      | -0.27684 |
| AC010834.3 | -0.27688 |
| ENTPD1     | -0.27693 |
| TPSB2      | -0.277   |
| RHOA-IT1   | -0.27707 |
| AP003170.3 | -0.27712 |
| CCR5AS     | -0.27719 |
| MRNIP      | -0.2772  |
| LEFTY2     | -0.27723 |
| PAOX       | -0.27732 |
| IL17C      | -0.27746 |
| AL354989.1 | -0.27758 |
| PNPLA7     | -0.27778 |
| AC242842.1 | -0.27791 |
| AC008507.1 | -0.27816 |
| AC012513.3 | -0.27818 |
| LINC00847  | -0.27819 |
| C8G        | -0.2782  |
| KLF2       | -0.27842 |
| RANP4      | -0.27856 |
| AP000692.1 | -0.27861 |
| PSMB10     | -0.27866 |
| RASGRF1    | -0.27872 |
| ELAPOR1    | -0.27886 |
| RPL36AP43  | -0.27903 |
| GSDMA      | -0.27905 |
| LIPM       | -0.27916 |
| SHOC1      | -0.27919 |
| GMIP       | -0.27923 |
| PLCL1      | -0.27927 |
| CALM2P2    | -0.27929 |
| FAM229B    | -0.27931 |
| AC121761.2 | -0.27932 |
| CYFIP2     | -0.27936 |
| IL3RA      | -0.27939 |
| PNISR      | -0.27952 |
| ADCY4      | -0.27963 |
| AC108215.1 | -0.27972 |
| PAG1       | -0.27977 |
| snoZ196    | -0.27978 |
| AC253536.6 | -0.27981 |
| CLK1       | -0.27985 |
| MVB12B     | -0.27991 |
| RPS29P16   | -0.27991 |
| IGLV3-29   | -0.27993 |
| MIR7856    | -0.27998 |
| SPOCK2     | -0.28    |
| TTC39C     | -0.28004 |
| RRAGD      | -0.28016 |

|               |          |
|---------------|----------|
| CEACAM4       | -0.28017 |
| CYP7B1        | -0.28018 |
| ZNF75D        | -0.28023 |
| AC103691.1    | -0.28025 |
| CRACDL        | -0.2808  |
| ANKRD12       | -0.28082 |
| GPR143        | -0.28098 |
| AC069257.2    | -0.28099 |
| TLR6          | -0.28102 |
| DOCK3         | -0.28107 |
| PLA2G5        | -0.2813  |
| AP006621.4    | -0.28155 |
| FOSB          | -0.2816  |
| KIAA1841      | -0.28189 |
| AP003419.3    | -0.28196 |
| ANGPTL1       | -0.28197 |
| ITGAM         | -0.28233 |
| RNU6-1157P    | -0.28245 |
| MIR6075       | -0.28248 |
| RNU6-481P     | -0.28249 |
| AC125603.2    | -0.28263 |
| ANKRD34A      | -0.28267 |
| RPL23AP64     | -0.28267 |
| AL354893.1    | -0.28291 |
| CCDC189       | -0.28295 |
| AL451007.1    | -0.28304 |
| ANKRD35       | -0.28305 |
| ZNF266        | -0.28308 |
| NFKBIZ        | -0.28309 |
| LGMN          | -0.28328 |
| MAT1A         | -0.28341 |
| BCL2A1        | -0.2836  |
| LINC02889     | -0.28366 |
| BATF3         | -0.28369 |
| HOXB5         | -0.28375 |
| JMJD7-PLA2G4B | -0.28384 |
| C14orf28      | -0.28388 |
| ZNF700        | -0.28391 |
| GBP2          | -0.28393 |
| RAB11FIP1P1   | -0.28409 |
| AC018638.8    | -0.28438 |
| HLA-DPB2      | -0.28465 |
| AF111168.1    | -0.28469 |
| MIR6859-1     | -0.28492 |
| UVSSA         | -0.28504 |
| IGFBP2        | -0.28504 |
| AL022316.1    | -0.28514 |
| PSME2         | -0.28522 |
| FAM89A        | -0.28525 |



|            |          |
|------------|----------|
| MAMSTR     | -0.28533 |
| ZNF573     | -0.28544 |
| DNAH2      | -0.28545 |
| AC025048.4 | -0.28546 |
| AHSA2P     | -0.2855  |
| NSA2P3     | -0.28555 |
| RSRP1      | -0.28569 |
| RNU6-1136P | -0.28579 |
| AC109460.2 | -0.28581 |
| TNFRSF4    | -0.2859  |
| SGK3       | -0.28605 |
| Z95152.1   | -0.28611 |
| CDKN2D     | -0.28611 |
| FMO3       | -0.28627 |
| SSR4       | -0.28634 |
| CHEK2      | -0.28645 |
| FBXW7      | -0.28647 |
| NONOP2     | -0.2865  |
| AC136475.8 | -0.28653 |
| CBX3P2     | -0.28676 |
| ZBTB16     | -0.28695 |
| MAP3K12    | -0.28709 |
| GPRIN2     | -0.28711 |
| MT1G       | -0.28714 |
| RAPGEF6    | -0.28716 |
| AL590326.1 | -0.28721 |
| RINL       | -0.28733 |
| CPQ        | -0.28736 |
| C16orf86   | -0.28738 |
| ALOX12     | -0.2875  |
| AL449212.1 | -0.28757 |
| MIR23A     | -0.28758 |
| DSTNP1     | -0.28777 |
| AC007038.1 | -0.28797 |
| RIPOR3     | -0.28803 |
| HMGA1P8    | -0.28805 |
| MAFA-AS1   | -0.28813 |
| HECA       | -0.28815 |
| TAS2R20    | -0.28817 |
| RFX5-AS1   | -0.28821 |
| AC048341.1 | -0.28821 |
| AKAP5      | -0.28825 |
| SNX10      | -0.28841 |
| AC007566.1 | -0.28841 |
| SLC25A27   | -0.28841 |
| ZNF710-AS1 | -0.28856 |
| LYG1       | -0.28872 |
| SC5D       | -0.28879 |
| ZNF546     | -0.28914 |

|            |          |
|------------|----------|
| DKK2       | -0.2892  |
| IRAK3      | -0.28923 |
| FOXN3-AS1  | -0.2893  |
| SNORD7     | -0.28957 |
| DMXL2      | -0.28968 |
| THBS4      | -0.28978 |
| UAP1L1     | -0.28979 |
| CCDC113    | -0.28983 |
| PRDX6-AS1  | -0.28988 |
| LCA5L      | -0.28995 |
| XRN1       | -0.28996 |
| CYP27A1    | -0.29006 |
| AL109614.1 | -0.29014 |
| AL135844.1 | -0.29042 |
| PSMA6      | -0.29045 |
| NIN        | -0.29045 |
| EXOSC3P1   | -0.29047 |
| MIS18BP1   | -0.29051 |
| CD44-AS1   | -0.2906  |
| AL139246.3 | -0.29068 |
| AC125437.1 | -0.29075 |
| RNU6-915P  | -0.29087 |
| RCBTB2     | -0.29116 |
| RNU6-1011P | -0.29151 |
| CCNE2      | -0.2916  |
| KHDRBS3    | -0.29165 |
| AC104695.3 | -0.29165 |
| HERC1      | -0.29171 |
| BST1       | -0.29179 |
| IRAG2      | -0.29197 |
| CARD9      | -0.29203 |
| PDCL3P4    | -0.29212 |
| HSD17B7P2  | -0.29214 |
| KLK7       | -0.29218 |
| DYNLT2     | -0.29219 |
| SERPINB3   | -0.29226 |
| AC008870.2 | -0.29227 |
| AC132938.5 | -0.29267 |
| MIR4257    | -0.2929  |
| ATF7IP2    | -0.29295 |
| AP001625.2 | -0.29298 |
| ZNF91      | -0.29319 |
| HMBBOX1    | -0.29324 |
| LGI4       | -0.29326 |
| CCNO       | -0.2933  |
| AC091185.1 | -0.29362 |
| TRIM46     | -0.29365 |
| FANCM      | -0.2938  |
| BTN3A2     | -0.29388 |

|             |          |
|-------------|----------|
| MAP3K8      | -0.2939  |
| AL136418.1  | -0.29393 |
| TSHZ2       | -0.29396 |
| WNT11       | -0.2943  |
| PIK3R1      | -0.29431 |
| ENPP2       | -0.29432 |
| SYTL5       | -0.29438 |
| CLIC2       | -0.2944  |
| SUV39H2-DT  | -0.29441 |
| SETDB2      | -0.29472 |
| ATP13A4-AS1 | -0.29477 |
| MIR4312     | -0.29481 |
| HERC5       | -0.29484 |
| AC102945.2  | -0.29491 |
| NKTR        | -0.29505 |
| MIR186      | -0.29535 |
| NFKBIA      | -0.29546 |
| CLK4        | -0.29547 |
| AOX1        | -0.29549 |
| DNAH14      | -0.29555 |
| AC018926.2  | -0.29556 |
| RNA5SP383   | -0.29569 |
| DND1P1      | -0.29575 |
| PILRA       | -0.29576 |
| PIWIL4      | -0.29615 |
| LIPA        | -0.29617 |
| SLC19A3     | -0.29638 |
| GAS8-AS1    | -0.29639 |
| RNF175      | -0.29646 |
| TFCP2L1     | -0.29647 |
| RTL5        | -0.29671 |
| MYO15B      | -0.29694 |
| TBC1D4      | -0.29696 |
| RELT        | -0.29714 |
| PDCD4-AS1   | -0.29716 |
| AC009120.2  | -0.29717 |
| C1QTNF3     | -0.29737 |
| DOCK11      | -0.29746 |
| DOP1A       | -0.29771 |
| CXCL12      | -0.29774 |
| COL14A1     | -0.29774 |
| FMNL3       | -0.29801 |
| CD68        | -0.2981  |
| MB          | -0.29812 |
| MIR23AHG    | -0.2982  |
| MIR548AA2   | -0.29829 |
| AC073655.2  | -0.2984  |
| ZNF615      | -0.29848 |
| IL18R1      | -0.29854 |

|            |          |
|------------|----------|
| AC233728.1 | -0.29861 |
| CXCL2      | -0.29886 |
| AC126544.1 | -0.29895 |
| EID2B      | -0.29901 |
| STRA6      | -0.29902 |
| APOLD1     | -0.29908 |
| EBF1       | -0.29909 |
| SEPTIN7P13 | -0.29917 |
| LRR8C      | -0.29918 |
| SLC25A45   | -0.29947 |
| AL663070.1 | -0.2996  |
| AXIN2      | -0.29972 |
| LAMA2      | -0.29972 |
| AC020907.4 | -0.29973 |
| ASMTL-AS1  | -0.29977 |
| ZNF235     | -0.29984 |
| AC127024.4 | -0.29995 |
| CSPP1      | -0.29996 |
| BBOF1      | -0.30029 |
| MTND1P23   | -0.30043 |
| AC007552.2 | -0.3008  |
| AC007014.2 | -0.30084 |
| ZFP36      | -0.3011  |
| REV3L      | -0.30116 |
| AC010531.6 | -0.3012  |
| ANKS4B     | -0.30122 |
| C1RL-AS1   | -0.30122 |
| RN7SL130P  | -0.30125 |
| AL359697.1 | -0.30126 |
| U62317.1   | -0.30131 |
| PARGP1     | -0.30159 |
| SP3P       | -0.30176 |
| KATNAL2    | -0.30188 |
| RPS29P11   | -0.3019  |
| RNU1-103P  | -0.3019  |
| FCGR3A     | -0.30217 |
| SRD5A2     | -0.30226 |
| AC010186.3 | -0.30232 |
| AC007216.4 | -0.30264 |
| MIR570     | -0.30269 |
| AC011468.5 | -0.30283 |
| TMEM67     | -0.30287 |
| MIR4284    | -0.30292 |
| RNU6-574P  | -0.30295 |
| BX539320.1 | -0.30303 |
| DGKE       | -0.30327 |
| ATP5BP5    | -0.30381 |
| ATP1B3-AS1 | -0.30383 |
| CROCCP3    | -0.30387 |

|              |          |
|--------------|----------|
| CKM          | -0.30393 |
| FKBP11       | -0.30395 |
| AC010201.2   | -0.30395 |
| TRAF3IP2-AS1 | -0.30424 |
| SLC51A       | -0.30425 |
| HDAC4        | -0.30432 |
| AC068790.5   | -0.30443 |
| PPP1R12B     | -0.30449 |
| PRSS36       | -0.30455 |
| C19orf38     | -0.30468 |
| ZNF100       | -0.30477 |
| TIMD4        | -0.30478 |
| CTSW         | -0.30479 |
| VCAM1        | -0.30482 |
| ATP2A1-AS1   | -0.30491 |
| SLBP-DT      | -0.30493 |
| SHPRH        | -0.30493 |
| ZNF439       | -0.305   |
| MMRN1        | -0.30503 |
| RAD51B       | -0.30519 |
| PPIEL        | -0.30528 |
| MAILR        | -0.30532 |
| MS4A4A       | -0.30541 |
| KPNA5        | -0.3056  |
| PREX2        | -0.30567 |
| CRYGS        | -0.30567 |
| DEGS2        | -0.30578 |
| AC093788.1   | -0.30586 |
| BNIP5        | -0.30589 |
| RAMP3        | -0.30598 |
| BOLA3-AS1    | -0.30604 |
| IPO5P1       | -0.30605 |
| UBA7         | -0.30616 |
| AC093525.8   | -0.30621 |
| AC012615.1   | -0.30628 |
| FAM167A      | -0.30632 |
| PSTPIP2      | -0.30655 |
| AC005840.4   | -0.30661 |
| SPATA17      | -0.30664 |
| AC099677.1   | -0.30683 |
| SNCAIP       | -0.30695 |
| MIR1285-1    | -0.30696 |
| CCP110       | -0.3071  |
| PGM5P4       | -0.30712 |
| METTL7A      | -0.3072  |
| AC004223.4   | -0.30721 |
| UBXN11       | -0.30726 |
| TYMP         | -0.30749 |
| LINC01644    | -0.3076  |

|            |          |
|------------|----------|
| GBP6       | -0.30768 |
| UBE2L6     | -0.30797 |
| AC005839.1 | -0.30834 |
| CARD16     | -0.30834 |
| AC073534.2 | -0.30847 |
| PAN3-AS1   | -0.30853 |
| SLIT3      | -0.30853 |
| ARPC3P1    | -0.3086  |
| AC004908.2 | -0.30863 |
| AC008267.3 | -0.30866 |
| CFAP44     | -0.30867 |
| OSCAR      | -0.3088  |
| AC007292.1 | -0.30889 |
| GIPR       | -0.30891 |
| PPP4R1L    | -0.30897 |
| EPSTI1     | -0.30902 |
| GPR132     | -0.30905 |
| NARF-IT1   | -0.30926 |
| AC004466.3 | -0.30933 |
| STAG3      | -0.30935 |
| GDF15      | -0.30944 |
| DNAJC19P5  | -0.30948 |
| CLEC1A     | -0.30953 |
| AC113139.1 | -0.30953 |
| AP001931.1 | -0.30987 |
| DGKA       | -0.3099  |
| DNALI1     | -0.30999 |
| KRR1P1     | -0.31007 |
| HS3ST3B1   | -0.31034 |
| KRT40      | -0.31049 |
| RHEX       | -0.31063 |
| VSIR       | -0.31071 |
| LYST       | -0.31073 |
| AC008969.1 | -0.3113  |
| AC245100.6 | -0.31138 |
| STK10      | -0.31179 |
| LRRC39     | -0.31181 |
| RNA5SP37   | -0.31204 |
| PLA2G6     | -0.31215 |
| RNF125     | -0.31217 |
| AL162724.1 | -0.31235 |
| TNFAIP8    | -0.31245 |
| CCDC191    | -0.31255 |
| SNX22      | -0.31258 |
| PTPN6      | -0.31302 |
| AGAP1-IT1  | -0.31333 |
| UCP2       | -0.31334 |
| TBX19      | -0.3134  |
| NFKBID     | -0.31357 |

|            |          |
|------------|----------|
| PSPC1-AS2  | -0.31381 |
| NDUFAF6    | -0.31382 |
| RNA5SP108  | -0.31395 |
| AADAT      | -0.31398 |
| TDRD10     | -0.31406 |
| LINC00968  | -0.31409 |
| SIGLEC7    | -0.31428 |
| MATN2      | -0.31441 |
| AC138207.4 | -0.31444 |
| ANXA2R     | -0.31463 |
| KCTD12     | -0.31488 |
| AMPD3      | -0.31516 |
| MIR6753    | -0.3152  |
| LRRC25     | -0.31526 |
| AC016717.2 | -0.31532 |
| GM2A       | -0.31536 |
| SCML1      | -0.31536 |
| PRORP      | -0.3154  |
| AC090114.3 | -0.31564 |
| AC009054.2 | -0.31572 |
| RNU6-140P  | -0.31582 |
| AL021578.1 | -0.31592 |
| DEPDC7     | -0.31618 |
| FAM110D    | -0.31634 |
| AP006621.2 | -0.31636 |
| ZNF780B    | -0.31645 |
| LAP3       | -0.31654 |
| KIF12      | -0.31662 |
| MIR4453HG  | -0.31668 |
| SRP54-AS1  | -0.31679 |
| LRRK1      | -0.31682 |
| AF129075.1 | -0.31683 |
| CCL22      | -0.31684 |
| CORO7      | -0.31695 |
| EGR3       | -0.31706 |
| NCALD      | -0.31706 |
| AL136295.6 | -0.31709 |
| IFI44      | -0.31733 |
| A2M-AS1    | -0.31736 |
| ZNF154     | -0.31742 |
| ASCL2      | -0.31743 |
| ERVK13-1   | -0.31746 |
| DENND3     | -0.31752 |
| AL008582.1 | -0.31765 |
| ITGAE      | -0.31779 |
| CST4       | -0.31795 |
| AC109347.2 | -0.31799 |
| MIR6730    | -0.31803 |
| AL031670.1 | -0.31812 |

|            |          |
|------------|----------|
| CSF2RA     | -0.31826 |
| CASS4      | -0.3183  |
| CPA6       | -0.31846 |
| STK4       | -0.31863 |
| PPP1R36    | -0.31898 |
| TLR1       | -0.31935 |
| LYNX1      | -0.31946 |
| LY75       | -0.31974 |
| NABP1      | -0.31979 |
| PPP4R3B-DT | -0.32005 |
| SNORD59A   | -0.3201  |
| AC007319.1 | -0.32018 |
| SPATA13    | -0.32021 |
| AC131649.2 | -0.32028 |
| LOXL4      | -0.32032 |
| CSF1R      | -0.32035 |
| RESF1      | -0.32041 |
| TOGARAM1   | -0.32058 |
| AC010329.1 | -0.32072 |
| AC245884.8 | -0.32085 |
| KAT2B      | -0.32093 |
| AC007743.1 | -0.32112 |
| NIPSNAP3B  | -0.32153 |
| TXNDC5     | -0.32164 |
| IGFL1      | -0.32193 |
| LRRC8D-DT  | -0.32207 |
| ZNF37BP    | -0.3221  |
| OGT        | -0.32246 |
| HNRNPA1P27 | -0.32247 |
| KCND2      | -0.32263 |
| CNOT6L     | -0.32284 |
| AC083862.1 | -0.32284 |
| MHENCN     | -0.3233  |
| AC091390.2 | -0.32341 |
| SEMA3G     | -0.32347 |
| FYN        | -0.32353 |
| AL596094.1 | -0.32366 |
| MEF2C      | -0.32369 |
| PTOV1-AS2  | -0.32376 |
| SYPL1P2    | -0.32377 |
| MIR135A1   | -0.32391 |
| IQGAP2     | -0.32402 |
| RFX3-AS1   | -0.32415 |
| KCND3      | -0.32427 |
| UBE2J1     | -0.32438 |
| NPIPA5     | -0.32469 |
| SNORD117   | -0.32489 |
| AC131011.1 | -0.32492 |
| AC008105.2 | -0.32505 |



|            |          |
|------------|----------|
| AC073149.1 | -0.32514 |
| IQCIN      | -0.3252  |
| PKMP3      | -0.32529 |
| AC004067.1 | -0.32529 |
| COL21A1    | -0.32536 |
| MALT1      | -0.32543 |
| PIK3IP1    | -0.32545 |
| TRIM69     | -0.32547 |
| ACSL1      | -0.32556 |
| IL7        | -0.32566 |
| TMIGD3     | -0.32577 |
| TXNDC16    | -0.32615 |
| CYP4F29P   | -0.32617 |
| DHRS9      | -0.3262  |
| STOX1      | -0.32632 |
| THPO       | -0.32638 |
| ELN-AS1    | -0.3267  |
| AADAC      | -0.32711 |
| AL157394.1 | -0.32711 |
| GNA14      | -0.32725 |
| AC125603.1 | -0.32725 |
| AC020907.1 | -0.32744 |
| AC105219.1 | -0.32753 |
| SMPD3      | -0.32767 |
| AP001160.4 | -0.32797 |
| SNORA71B   | -0.328   |
| RNA5SP283  | -0.32818 |
| VN1R81P    | -0.32847 |
| HLA-C      | -0.32858 |
| ARC        | -0.3286  |
| CCDC184    | -0.32871 |
| KLF12      | -0.32887 |
| LAT2       | -0.32891 |
| AL731566.2 | -0.32896 |
| AL139421.1 | -0.32903 |
| MAOB       | -0.32913 |
| SLC38A6    | -0.32937 |
| CD163      | -0.32949 |
| AL117379.1 | -0.32954 |
| AL121839.2 | -0.32975 |
| KCNJ5      | -0.32983 |
| AC008870.5 | -0.32997 |
| ELMO1      | -0.33015 |
| FUT8-AS1   | -0.33039 |
| ZNF124     | -0.3304  |
| AK9        | -0.33055 |
| AMACR      | -0.33059 |
| BRCA1P1    | -0.33073 |
| CNTRL      | -0.33096 |

|            |          |
|------------|----------|
| ERAP2      | -0.33099 |
| REL        | -0.33124 |
| AL390879.1 | -0.33133 |
| MIR223HG   | -0.33139 |
| RNU7-123P  | -0.3314  |
| SOCS2      | -0.33141 |
| REM1       | -0.33171 |
| MSI1       | -0.33182 |
| GNGT2      | -0.33198 |
| THBS3-AS1  | -0.33205 |
| CPVL       | -0.33209 |
| AL139349.1 | -0.3321  |
| DDX12P     | -0.33244 |
| ZNF682     | -0.33246 |
| AL031432.2 | -0.33263 |
| AL391834.1 | -0.33274 |
| AC073487.1 | -0.333   |
| COTL1      | -0.33306 |
| GRK3       | -0.33308 |
| PLEKHO2    | -0.33334 |
| NR4A1AS    | -0.33349 |
| AC004492.1 | -0.3335  |
| TNFRSF19   | -0.33352 |
| CD33       | -0.33353 |
| AC005041.1 | -0.33374 |
| RAB3IP     | -0.33377 |
| GPCPD1     | -0.33393 |
| RGL1       | -0.33398 |
| ABAT       | -0.3341  |
| AC004825.2 | -0.33431 |
| SMC3P1     | -0.33439 |
| ZNF826P    | -0.33472 |
| AL049840.2 | -0.33472 |
| AC136475.2 | -0.33478 |
| KRT16P1    | -0.33481 |
| GNRH1      | -0.33489 |
| AC100830.2 | -0.33499 |
| SLC26A4    | -0.33504 |
| HLA-DRB6   | -0.33514 |
| TRPV2      | -0.3354  |
| AP003084.1 | -0.3356  |
| PGLYRP4    | -0.33566 |
| SH2D3C     | -0.33574 |
| AF117829.1 | -0.33574 |
| AL136295.2 | -0.33591 |
| TRABD2A    | -0.3362  |
| FGA        | -0.33634 |
| TNFRSF1B   | -0.33644 |
| RNU6-925P  | -0.33646 |

|             |          |
|-------------|----------|
| CLDN11      | -0.33646 |
| AL121601.1  | -0.33689 |
| TMEM233     | -0.33691 |
| NTNG2       | -0.33727 |
| AC245884.3  | -0.33732 |
| MIR590      | -0.33744 |
| TMEM150B    | -0.33744 |
| RASGRP1     | -0.33748 |
| CST7        | -0.33754 |
| AC004253.1  | -0.33755 |
| PTPRO       | -0.33799 |
| SERPINB4    | -0.33802 |
| LILRB3      | -0.33811 |
| AP003392.2  | -0.33814 |
| RN7SL333P   | -0.33828 |
| KLK1        | -0.33865 |
| ZMAT1       | -0.33874 |
| TYROBP      | -0.33889 |
| TRIM31      | -0.33889 |
| ZBTB25      | -0.33892 |
| FOXA1       | -0.33903 |
| MIR221      | -0.33912 |
| MANEA       | -0.33914 |
| TSPYL5      | -0.33928 |
| MORN3       | -0.33931 |
| AC005154.1  | -0.33935 |
| ZNF493      | -0.33952 |
| SLC8A1      | -0.33957 |
| GOLGA7B     | -0.33963 |
| GEMIN7-AS1  | -0.33968 |
| S1PR1       | -0.33977 |
| AC020658.5  | -0.33981 |
| LINC02195   | -0.33987 |
| AC087500.1  | -0.33988 |
| ST8SIA6-AS1 | -0.3399  |
| MIR3189     | -0.34021 |
| ZNF714      | -0.34031 |
| MAP3K14     | -0.34068 |
| FAM124B     | -0.34108 |
| AC008752.3  | -0.34161 |
| TSSK4       | -0.34162 |
| AC090559.1  | -0.34163 |
| LINC01730   | -0.34188 |
| SFI1        | -0.34188 |
| IL15        | -0.34206 |
| CD40        | -0.34207 |
| CAPN6       | -0.34223 |
| HPCAL4      | -0.3424  |
| MYCBP2      | -0.34249 |

|            |          |
|------------|----------|
| AC110792.3 | -0.34264 |
| LINC01089  | -0.3427  |
| AC011815.1 | -0.34284 |
| TMEM176A   | -0.34287 |
| SMTNL2     | -0.34301 |
| RNU7-49P   | -0.34328 |
| SLC31A2    | -0.34339 |
| ZNF66      | -0.34361 |
| LINC00653  | -0.34386 |
| LGI2       | -0.34398 |
| AC005540.1 | -0.34413 |
| SNORD63B   | -0.34443 |
| FOS        | -0.34452 |
| TTLL3      | -0.34473 |
| AP002498.1 | -0.34475 |
| GOLGA8A    | -0.34483 |
| STAT5A     | -0.34495 |
| RADX       | -0.34497 |
| STAB1      | -0.3452  |
| KCNJ2      | -0.34521 |
| GLYCTK     | -0.34547 |
| PPP3CC     | -0.34549 |
| SNTB1      | -0.34563 |
| AL021707.2 | -0.34566 |
| MIR320E    | -0.34579 |
| AC008268.1 | -0.34596 |
| DTX1       | -0.34631 |
| IFI44L     | -0.34634 |
| HLA-E      | -0.34664 |
| GPC3       | -0.34667 |
| CCL3       | -0.34667 |
| RNU6-807P  | -0.34682 |
| CRLF2      | -0.34684 |
| AL049552.1 | -0.34689 |
| ATP6V0D2   | -0.34692 |
| AC012615.6 | -0.34708 |
| PDE3B      | -0.34709 |
| AC027097.1 | -0.34722 |
| ALG13-AS1  | -0.34724 |
| RPL10P12   | -0.34749 |
| AC004832.5 | -0.34765 |
| SNORA68B   | -0.34766 |
| GTF2IP9    | -0.34766 |
| RNA5SP187  | -0.34777 |
| AC025287.3 | -0.34782 |
| BTN3A3     | -0.34783 |
| B3GAT1-DT  | -0.34789 |
| CD300A     | -0.3479  |
| AC067930.3 | -0.3479  |

|            |          |
|------------|----------|
| AC009570.1 | -0.34804 |
| BTN3A1     | -0.34837 |
| SLC4A7     | -0.34857 |
| TC2N       | -0.34876 |
| C12orf75   | -0.34881 |
| CHL1       | -0.34883 |
| SLC13A3    | -0.34925 |
| MIR3164    | -0.34927 |
| APOBEC3F   | -0.34955 |
| BRMS1L     | -0.34955 |
| MLC1       | -0.3499  |
| SYNDIG1L   | -0.35005 |
| RNA5SP317  | -0.35008 |
| BMP8A      | -0.35015 |
| AC004908.1 | -0.35029 |
| OXER1      | -0.35035 |
| FCER1G     | -0.35051 |
| C8orf37    | -0.35062 |
| OR7E47P    | -0.35077 |
| TMEM260    | -0.35078 |
| AC005479.2 | -0.35083 |
| SEL1L      | -0.35096 |
| HTR2B      | -0.35098 |
| IL37       | -0.35146 |
| AL031600.1 | -0.3515  |
| RELL2      | -0.35153 |
| PRKCH      | -0.35166 |
| GNAO1      | -0.35168 |
| CECR7      | -0.352   |
| AL135999.1 | -0.35238 |
| PAK3       | -0.35247 |
| ATF5       | -0.35265 |
| AC002044.1 | -0.35269 |
| AC058791.1 | -0.35281 |
| AC024580.1 | -0.35291 |
| COL28A1    | -0.35293 |
| VAV1       | -0.35294 |
| RPL5P23    | -0.35297 |
| AC108449.2 | -0.35307 |
| CYSLTR1    | -0.35315 |
| CR936218.1 | -0.35336 |
| SLC1A4     | -0.3534  |
| AP001178.2 | -0.35351 |
| MIR148A    | -0.35351 |
| FP671120.7 | -0.35356 |
| LDLRAD4    | -0.35367 |
| DPP10-AS1  | -0.35381 |
| AL590226.1 | -0.35413 |
| RTP4       | -0.35414 |

|            |          |
|------------|----------|
| AL022328.3 | -0.35416 |
| ATP1A2     | -0.35431 |
| AC130456.3 | -0.35437 |
| AL671277.2 | -0.3544  |
| LINC02352  | -0.35469 |
| TAS1R3     | -0.35473 |
| GADD45G    | -0.35474 |
| FAM201A    | -0.35476 |
| AL592494.2 | -0.35476 |
| MAFB       | -0.35503 |
| TMEM63C    | -0.35559 |
| MIATNB     | -0.35566 |
| CFP        | -0.3558  |
| SIRPB2     | -0.35591 |
| MIR1249    | -0.35595 |
| TAP1       | -0.35625 |
| SCUBE2     | -0.35632 |
| GRIK5      | -0.35638 |
| AC138207.5 | -0.35651 |
| AP1S2      | -0.35653 |
| AC025171.5 | -0.35666 |
| AL139396.1 | -0.35671 |
| MS4A7      | -0.35684 |
| AL136981.2 | -0.35696 |
| TRAV2      | -0.35701 |
| KIF1A      | -0.35702 |
| AC124312.2 | -0.35705 |
| PLPPR3     | -0.35732 |
| AC092645.1 | -0.35743 |
| AC112496.1 | -0.35745 |
| SNORA2A    | -0.35761 |
| CBLN3      | -0.35768 |
| AC048341.2 | -0.35769 |
| AC012651.1 | -0.3579  |
| SP110      | -0.35791 |
| AC027097.2 | -0.35809 |
| RPGR       | -0.35816 |
| A2M        | -0.35819 |
| MIR5685    | -0.35828 |
| HMGN1P1    | -0.35861 |
| PAX7       | -0.35861 |
| HLF        | -0.35862 |
| AL022328.4 | -0.35863 |
| POPDC2     | -0.3587  |
| QPCT       | -0.35873 |
| CPED1      | -0.35897 |
| CXCL6      | -0.35917 |
| RNU6-1053P | -0.35926 |
| AC009120.3 | -0.35929 |

|            |          |
|------------|----------|
| CEACAM1    | -0.35969 |
| MAP2K6     | -0.36022 |
| AL021707.6 | -0.36032 |
| ZNF589     | -0.36052 |
| SSTR1      | -0.36062 |
| GLIPR2     | -0.36129 |
| RN7SKP16   | -0.36146 |
| AC009061.2 | -0.36166 |
| AC007216.3 | -0.36169 |
| F10        | -0.36173 |
| AC002059.2 | -0.36183 |
| RNU6-415P  | -0.36197 |
| RN7SL4P    | -0.36204 |
| RUNX1T1    | -0.36207 |
| BAAT       | -0.36221 |
| DIRAS3     | -0.36227 |
| SNORD12C   | -0.36242 |
| PTPRN2     | -0.36243 |
| RFX2       | -0.3626  |
| AC005479.1 | -0.36275 |
| B2M        | -0.3628  |
| AC079921.2 | -0.36332 |
| CCDC28B    | -0.3634  |
| AC120349.1 | -0.36346 |
| USP2       | -0.36348 |
| LILRB2     | -0.36399 |
| ZNF486     | -0.36405 |
| TXNP6      | -0.36412 |
| TAMALIN    | -0.36414 |
| AC009090.1 | -0.36419 |
| PABPN1P1   | -0.36424 |
| NCMAP      | -0.36461 |
| ANKDD1A    | -0.36464 |
| ZFHX2      | -0.36534 |
| AC124283.4 | -0.36534 |
| BANCR      | -0.36538 |
| NRIP3      | -0.36593 |
| MIR4677    | -0.36594 |
| DZIP3      | -0.36596 |
| DAPP1      | -0.36599 |
| FCN1       | -0.36612 |
| HLA-L      | -0.36618 |
| PSMA3-AS1  | -0.36638 |
| LILRB5     | -0.36643 |
| TRANK1     | -0.36652 |
| AC010719.1 | -0.36676 |
| AC138409.2 | -0.36693 |
| RBM12B-AS1 | -0.36703 |
| CLIC6      | -0.36739 |

|              |          |
|--------------|----------|
| ERVMER34-1   | -0.36739 |
| TPSAB1       | -0.3674  |
| AKAP7        | -0.36745 |
| UBXN10       | -0.36757 |
| ST8SIA4      | -0.36771 |
| AC097641.2   | -0.36791 |
| ZNF440       | -0.36803 |
| ZDHHC21      | -0.36803 |
| AC116914.2   | -0.3681  |
| SLCO2B1      | -0.36854 |
| MIR5581      | -0.3688  |
| KLK11        | -0.36895 |
| ARID5A       | -0.36901 |
| SETBP1       | -0.36913 |
| CCDC40       | -0.36919 |
| SESN1        | -0.36921 |
| RN7SL566P    | -0.36944 |
| VENTX        | -0.36953 |
| CYLD         | -0.36975 |
| TOX3         | -0.36979 |
| C20orf197    | -0.36994 |
| NECAB1       | -0.36998 |
| RN7SL608P    | -0.37003 |
| AC005154.2   | -0.37005 |
| LPIN1        | -0.37054 |
| LILRA6       | -0.37086 |
| CTB-178M22.2 | -0.37088 |
| AL365226.1   | -0.37116 |
| C3AR1        | -0.37118 |
| NRXN3        | -0.3713  |
| S100B        | -0.37145 |
| AP000254.1   | -0.37148 |
| C1orf54      | -0.37165 |
| AC073210.1   | -0.37192 |
| MCIDAS       | -0.37207 |
| AC131212.2   | -0.37212 |
| AC010226.1   | -0.37218 |
| VPS13C       | -0.37227 |
| ETS1         | -0.3723  |
| ANKRD45      | -0.37231 |
| ELOCP19      | -0.3724  |
| MIR561       | -0.37294 |
| MAGOH2P      | -0.37306 |
| MIR126       | -0.37316 |
| PTN          | -0.37317 |
| HES6         | -0.37334 |
| DEPP1        | -0.37339 |
| RGS9         | -0.37349 |
| MAL          | -0.37349 |



|            |          |
|------------|----------|
| TNFRSF25   | -0.37353 |
| AC026412.3 | -0.37354 |
| SP5        | -0.37359 |
| PRAM1      | -0.37403 |
| AC020765.2 | -0.37413 |
| FMR1-IT1   | -0.37426 |
| AL109741.1 | -0.37441 |
| AC005519.1 | -0.37443 |
| VEGFD      | -0.37455 |
| AC027290.2 | -0.37462 |
| AC092279.1 | -0.37467 |
| CCDC152    | -0.37469 |
| ZNF577     | -0.3747  |
| RNU6-387P  | -0.37473 |
| ITGB2      | -0.37484 |
| AC093110.1 | -0.37492 |
| PPARGC1B   | -0.37509 |
| LSAMP      | -0.37512 |
| H3C4       | -0.37519 |
| ETV7       | -0.37548 |
| AC232271.1 | -0.3755  |
| DEF6       | -0.37556 |
| GNG7       | -0.37568 |
| AC138956.1 | -0.37577 |
| RASSF5     | -0.37612 |
| HLA-S      | -0.37618 |
| AC007919.1 | -0.37627 |
| RN7SKP173  | -0.37665 |
| CD83       | -0.37687 |
| TMEM255B   | -0.37697 |
| ZKSCAN2-DT | -0.37702 |
| CCDC153    | -0.37708 |
| ARHGAP4    | -0.37715 |
| NR1H3      | -0.37733 |
| COLCA1     | -0.37736 |
| CAMK2N2    | -0.37739 |
| ZNF215     | -0.37744 |
| SYNE1      | -0.37793 |
| AC117503.4 | -0.378   |
| BX293535.1 | -0.37813 |
| MIR593     | -0.37842 |
| RPL35AP5   | -0.37849 |
| HLA-DMA    | -0.37896 |
| C2CD4A     | -0.37896 |
| KLF7-IT1   | -0.37911 |
| TSPAN11    | -0.37911 |
| AC096720.1 | -0.37914 |
| AC079210.1 | -0.37954 |
| CBX7       | -0.37959 |

|            |          |
|------------|----------|
| HCAR1      | -0.37971 |
| MAN1A1     | -0.37979 |
| SH3BP5-AS1 | -0.37998 |
| PIK3C2G    | -0.38031 |
| FFAR4      | -0.38037 |
| HAAO       | -0.38075 |
| HLA-H      | -0.38091 |
| HLA-B      | -0.38102 |
| CUL4A      | -0.38109 |
| DES        | -0.38157 |
| MYO7A      | -0.38201 |
| MIR4324    | -0.38206 |
| SIGLEC1    | -0.38229 |
| AP001207.3 | -0.38233 |
| AC092119.2 | -0.38255 |
| LINC02036  | -0.38282 |
| AC010883.1 | -0.38304 |
| RNU7-40P   | -0.38318 |
| TMEM119    | -0.38322 |
| LGALS9     | -0.3842  |
| ENPP3      | -0.38424 |
| CLEC7A     | -0.38431 |
| NXPE3      | -0.38437 |
| Z82243.1   | -0.38442 |
| HCP5       | -0.38481 |
| MIR29B2CHG | -0.38484 |
| NPHP1      | -0.38518 |
| ORAOV1P1   | -0.38551 |
| LRP5L      | -0.386   |
| RNY4P19    | -0.3861  |
| MNDA       | -0.38621 |
| SPATA6L    | -0.38634 |
| AC124067.2 | -0.38641 |
| AL590723.1 | -0.38642 |
| GPSM3      | -0.38648 |
| AL021707.3 | -0.38656 |
| ZNF708     | -0.38667 |
| CASQ2      | -0.38695 |
| ITGA8      | -0.38715 |
| EFHC1      | -0.38726 |
| CCR10      | -0.3873  |
| IGFBPL1    | -0.38736 |
| MIR600HG   | -0.38754 |
| KHDRBS2    | -0.38773 |
| DNAJC12    | -0.3878  |
| AC007490.1 | -0.38829 |
| BPIFA1     | -0.3883  |
| HOXB8      | -0.38871 |
| IRF1       | -0.38874 |

|            |          |
|------------|----------|
| C4BPB      | -0.38926 |
| MNS1       | -0.38931 |
| AC011445.1 | -0.38931 |
| MIR222HG   | -0.38958 |
| AC114748.1 | -0.3897  |
| AC026704.1 | -0.39024 |
| AC084337.1 | -0.39149 |
| MAPK10     | -0.3915  |
| PLAAT2     | -0.39185 |
| AC016590.2 | -0.39192 |
| CACNA1D    | -0.3921  |
| SYK        | -0.39239 |
| HDAC4-AS1  | -0.39241 |
| TNXB       | -0.39244 |
| CCDC200    | -0.39279 |
| SEC31B     | -0.39313 |
| APOBEC3A   | -0.39323 |
| SLC15A3    | -0.39329 |
| SPEF2      | -0.39372 |
| FMO5       | -0.39407 |
| SMAD9      | -0.39421 |
| AC026979.2 | -0.39423 |
| LINC00852  | -0.39456 |
| RTKN2      | -0.395   |
| FPR3       | -0.39528 |
| TSPOAP1    | -0.39531 |
| AC055822.1 | -0.39546 |
| CBFA2T3    | -0.39582 |
| CRYM       | -0.39593 |
| CAPN3      | -0.39605 |
| NPTN-IT1   | -0.3961  |
| FAM178B    | -0.39611 |
| STAC3      | -0.39621 |
| GPR34      | -0.3964  |
| BMP2K      | -0.3965  |
| CCND2      | -0.39651 |
| DPT        | -0.39652 |
| NRROS      | -0.39662 |
| AC009974.1 | -0.39671 |
| SNORA16B   | -0.39696 |
| RASGEF1B   | -0.397   |
| LINC02418  | -0.39712 |
| INMT       | -0.39712 |
| RPRM       | -0.39725 |
| RAB39A     | -0.39729 |
| EGR2       | -0.39767 |
| RPL11P3    | -0.39861 |
| ZNF726     | -0.39876 |
| PDE4B      | -0.39878 |

|            |          |
|------------|----------|
| SYNPO2     | -0.39958 |
| DPY19L1P2  | -0.39976 |
| RAC2       | -0.40021 |
| ZNF366     | -0.40021 |
| LHFPL3     | -0.40025 |
| COL22A1    | -0.40041 |
| CEP126     | -0.40083 |
| SKAP1      | -0.40098 |
| ZDHHC11B   | -0.40106 |
| ASGR1      | -0.40126 |
| AP000786.1 | -0.40142 |
| SNORA66    | -0.40148 |
| AL021707.4 | -0.40177 |
| PPP1R3E    | -0.40178 |
| THEMIS2    | -0.40187 |
| PDCD1LG2   | -0.40202 |
| RN7SL81P   | -0.40202 |
| CTSS       | -0.40223 |
| CDH6       | -0.40231 |
| AC141273.2 | -0.40237 |
| ANKDD1B    | -0.40242 |
| PLEKHO1    | -0.40285 |
| AC099518.1 | -0.40288 |
| LRP2BP     | -0.40296 |
| ITIH5      | -0.4031  |
| GRAP       | -0.40313 |
| AC093809.1 | -0.40322 |
| EBLN2      | -0.40335 |
| AL359513.1 | -0.40336 |
| LRP4       | -0.40371 |
| AC139769.1 | -0.4038  |
| TCAF2      | -0.40385 |
| KCNA3      | -0.40386 |
| LPAR6      | -0.40393 |
| CLDND2     | -0.40397 |
| EFHC2      | -0.40402 |
| MS4A14     | -0.40415 |
| LGR6       | -0.40421 |
| FOXJ1      | -0.40422 |
| AC066613.1 | -0.40439 |
| AL357500.2 | -0.40477 |
| PELI2      | -0.40487 |
| HELB       | -0.40493 |
| HAVCR2     | -0.40551 |
| CCDC69     | -0.40554 |
| ODF3B      | -0.40555 |
| ATP5PDP4   | -0.40563 |
| SLC2A6     | -0.40588 |
| RNU6-1165P | -0.4059  |

|              |          |
|--------------|----------|
| ZNF540       | -0.40646 |
| MGAT4A       | -0.40667 |
| HS1BP3-IT1   | -0.40691 |
| TMEM176B     | -0.4071  |
| LINC01150    | -0.40721 |
| AL160271.2   | -0.40734 |
| KIAA1755     | -0.40736 |
| AC118344.2   | -0.40744 |
| RNU6-322P    | -0.40805 |
| AL450263.1   | -0.4081  |
| SCN7A        | -0.40826 |
| AC087385.1   | -0.40836 |
| PIGR         | -0.40925 |
| MTND4P24     | -0.4093  |
| AC037198.2   | -0.4093  |
| LINC00893    | -0.40988 |
| LINC00987    | -0.4102  |
| C1orf162     | -0.41057 |
| AP003717.1   | -0.41081 |
| TM6SF1       | -0.41172 |
| AL359076.1   | -0.41185 |
| STAT4        | -0.41207 |
| PI16         | -0.4122  |
| RNU6-1280P   | -0.41228 |
| AL357054.4   | -0.41241 |
| ATM          | -0.41266 |
| RTN1         | -0.41272 |
| AC132192.2   | -0.41299 |
| ADAM28       | -0.41318 |
| AC084018.1   | -0.41322 |
| AC069366.1   | -0.41327 |
| HOXB-AS1     | -0.41328 |
| FCGR1A       | -0.41357 |
| ACADL        | -0.41358 |
| AC010536.2   | -0.41376 |
| AC111149.2   | -0.41439 |
| AC002128.2   | -0.41443 |
| GPRASP1      | -0.41449 |
| DOK2         | -0.41456 |
| LEF1         | -0.4147  |
| ZEB2         | -0.41498 |
| FNBP1        | -0.41512 |
| STX11        | -0.41512 |
| AC023818.1   | -0.41514 |
| XG           | -0.41514 |
| LCN2         | -0.41531 |
| AC027559.1   | -0.41558 |
| NTS          | -0.41569 |
| TNFRSF14-AS1 | -0.41603 |

|             |          |
|-------------|----------|
| TNFAIP3     | -0.41607 |
| WAKMAR2     | -0.41614 |
| CD300LF     | -0.41618 |
| HK3         | -0.41631 |
| TFDP1       | -0.41631 |
| TLDC2       | -0.4165  |
| CKS1BP1     | -0.41654 |
| AL159169.2  | -0.41679 |
| AC138932.4  | -0.41702 |
| SAMHD1      | -0.41746 |
| CCDC96      | -0.41752 |
| RASSF4      | -0.41769 |
| LINC01556   | -0.41784 |
| RNF166      | -0.41793 |
| KHDC1L      | -0.41804 |
| IL34        | -0.41831 |
| ANO5        | -0.41834 |
| MOK         | -0.4186  |
| SPI1        | -0.41867 |
| LY96        | -0.41876 |
| NUPR1       | -0.41901 |
| ST6GAL1     | -0.41936 |
| RAB36       | -0.41951 |
| H2BC18      | -0.41953 |
| IL33        | -0.41969 |
| PIK3CD      | -0.41974 |
| PSMB9       | -0.41987 |
| TTC39B      | -0.41992 |
| AL731567.1  | -0.42005 |
| AC009533.1  | -0.4204  |
| C1QC        | -0.42068 |
| PLXNC1      | -0.42076 |
| AC053513.2  | -0.42092 |
| MMP19       | -0.42107 |
| AL137782.1  | -0.42116 |
| SCAANT1     | -0.42128 |
| GPRIN3      | -0.42141 |
| RUNDC3A     | -0.42151 |
| TNFRSF14    | -0.4216  |
| AC243964.3  | -0.4218  |
| RPL7AP64    | -0.42221 |
| RNU6ATAC18P | -0.42222 |
| FER1L4      | -0.42224 |
| MS4A2       | -0.42229 |
| HAPLN3      | -0.42284 |
| CKMT2       | -0.42309 |
| C16orf71    | -0.42318 |
| SNORA65     | -0.42338 |
| PDK4        | -0.42341 |

|             |          |
|-------------|----------|
| AL139407.1  | -0.42343 |
| ZNF683      | -0.42371 |
| SLC7A7      | -0.42372 |
| RNU6-652P   | -0.42377 |
| RNU4-78P    | -0.42378 |
| CARD8       | -0.42409 |
| SOWAHD      | -0.42478 |
| AC093278.2  | -0.42479 |
| AC096733.2  | -0.42493 |
| TAS2R15P    | -0.42496 |
| ITPR2       | -0.42507 |
| SIDT1       | -0.42533 |
| CERKL       | -0.42536 |
| HABP2       | -0.4255  |
| AC009133.1  | -0.4257  |
| ACP5        | -0.42576 |
| TLR4        | -0.42584 |
| APOL6       | -0.42615 |
| MFAP4       | -0.42619 |
| ETV7-AS1    | -0.42666 |
| SEMA4D      | -0.42706 |
| ABCA5       | -0.42723 |
| CAPS2       | -0.42725 |
| RNU6-610P   | -0.42736 |
| MAN1C1      | -0.42744 |
| DYNC2H1     | -0.42801 |
| AIF1        | -0.42803 |
| SNORA69     | -0.4281  |
| PRKAR1B-AS1 | -0.42845 |
| AC253536.3  | -0.42851 |
| RENBP       | -0.4286  |
| PLD4        | -0.42861 |
| CCDC88C     | -0.4291  |
| AC027644.2  | -0.42971 |
| MIR4768     | -0.42978 |
| STAT1       | -0.42979 |
| AP001992.1  | -0.42981 |
| MIR3677     | -0.42985 |
| RASGRP3     | -0.42986 |
| SEPTIN6     | -0.42988 |
| EFCAB13     | -0.42988 |
| CHRNA1      | -0.42997 |
| CLEC4A      | -0.43021 |
| JAK2        | -0.43048 |
| RNU6-8      | -0.43121 |
| AC087284.1  | -0.43123 |
| CASP1       | -0.4315  |
| AL353622.1  | -0.43155 |
| IVL         | -0.43206 |

|            |          |
|------------|----------|
| UBE2FP3    | -0.43211 |
| RNU6-1048P | -0.43225 |
| LINC01679  | -0.4325  |
| GYPC       | -0.43258 |
| PTGFR      | -0.43258 |
| SUSD3      | -0.43264 |
| C9orf72    | -0.43272 |
| CFAP69     | -0.43335 |
| TTLL7      | -0.43409 |
| TMEM231    | -0.43451 |
| MIRLET7D   | -0.43512 |
| AC010542.5 | -0.43515 |
| CHST1      | -0.43522 |
| RAP1AP     | -0.43577 |
| CH25H      | -0.43589 |
| AL031716.1 | -0.43591 |
| AC002128.1 | -0.43641 |
| ASRGL1     | -0.43676 |
| H2BC8      | -0.43678 |
| MBL1P      | -0.43777 |
| MTMR9LP    | -0.43808 |
| ATG16L2    | -0.43841 |
| AC108727.1 | -0.43859 |
| MLLT11     | -0.43897 |
| SFTPC      | -0.43943 |
| AL662844.4 | -0.43949 |
| PIH1D2     | -0.43973 |
| AL353804.1 | -0.43974 |
| TPSD1      | -0.44035 |
| SUN3       | -0.44056 |
| FAM96AP2   | -0.44072 |
| AL132989.1 | -0.44079 |
| RNU6-611P  | -0.44095 |
| SAMD9L     | -0.44115 |
| SNORA60    | -0.44153 |
| GAS7       | -0.44169 |
| PHACTR3    | -0.44186 |
| AC106782.4 | -0.44239 |
| FENDRR     | -0.44245 |
| LYL1       | -0.44249 |
| GCH1       | -0.44256 |
| GDF10      | -0.44256 |
| AC092535.5 | -0.44266 |
| CD86       | -0.44282 |
| AL157392.4 | -0.44283 |
| SMKR1      | -0.44301 |
| RN7SL481P  | -0.44315 |
| PKNOX2     | -0.44323 |
| ERICH5     | -0.44326 |



|            |          |
|------------|----------|
| H2BC11     | -0.44327 |
| GSTM5      | -0.44377 |
| AC025171.3 | -0.44383 |
| FXD1       | -0.44384 |
| SNORA13    | -0.44419 |
| GNG2       | -0.44419 |
| PDK1       | -0.44448 |
| ALDH1L2    | -0.44467 |
| MIR1270    | -0.44468 |
| PTGER4     | -0.44481 |
| AC139795.1 | -0.44482 |
| LAPTM5     | -0.4449  |
| H2AC8      | -0.44501 |
| DUOX2      | -0.44504 |
| MATK       | -0.44512 |
| GBP1       | -0.44517 |
| P2RY14     | -0.44521 |
| MMP13      | -0.44597 |
| HNF1A-AS1  | -0.44636 |
| SAMD15     | -0.44706 |
| DNAJB13    | -0.44731 |
| MMP12      | -0.44752 |
| AC005785.2 | -0.44774 |
| PLAC4      | -0.44797 |
| BEND5      | -0.44828 |
| XPC-AS1    | -0.44849 |
| ITPRD1     | -0.44892 |
| NFATC2     | -0.44918 |
| DDHD1      | -0.44934 |
| RN7SL5P    | -0.44948 |
| RN7SKP287  | -0.44962 |
| AC006059.1 | -0.45    |
| FMO2       | -0.45003 |
| DPYD-AS1   | -0.45098 |
| PTPRN      | -0.45116 |
| LSP1       | -0.45187 |
| BTN2A2     | -0.45191 |
| XIST       | -0.45252 |
| AC008906.1 | -0.45258 |
| MIR548AA1  | -0.45278 |
| HLA-DRB1   | -0.45282 |
| KLRF1      | -0.45283 |
| KIF1C-AS1  | -0.4529  |
| C4orf47    | -0.45323 |
| SLC6A1     | -0.45371 |
| AC068790.3 | -0.45398 |
| STK33      | -0.45418 |
| MPP1       | -0.45425 |
| AC083843.3 | -0.4543  |

|              |          |
|--------------|----------|
| LINC02345    | -0.45435 |
| MICAL1       | -0.45504 |
| MAPK15       | -0.45508 |
| TSPAN33      | -0.45552 |
| CACNA2D1     | -0.45557 |
| PRR29        | -0.45557 |
| AL365361.1   | -0.45589 |
| SMIM31       | -0.45593 |
| LINC01214    | -0.45597 |
| RNU7-171P    | -0.45604 |
| AC063961.1   | -0.45625 |
| SCAMP5       | -0.45632 |
| AC115989.1   | -0.45641 |
| CD74         | -0.45672 |
| AK8          | -0.45697 |
| AC012368.1   | -0.45702 |
| AL096865.1   | -0.45703 |
| BLNK         | -0.45731 |
| TRAF5        | -0.45781 |
| PTK2B        | -0.45913 |
| SNRPGP14     | -0.45918 |
| H4-16        | -0.45924 |
| SELPLG       | -0.45949 |
| LY86         | -0.45988 |
| SAP30L-AS1   | -0.46025 |
| TRAF1        | -0.4605  |
| AC116407.2   | -0.46116 |
| ATP8B4       | -0.46117 |
| FCGR1CP      | -0.46127 |
| AC008897.1   | -0.46147 |
| PDE1B        | -0.46166 |
| CD7          | -0.46176 |
| ACSS3        | -0.46187 |
| ITM2A        | -0.46209 |
| BMPER        | -0.46231 |
| SLC2A5       | -0.46236 |
| PLA2G4C      | -0.46242 |
| RNU6-407P    | -0.4627  |
| CCL18        | -0.46278 |
| RPL7AP10     | -0.46307 |
| AL133370.1   | -0.46308 |
| GRIN3B       | -0.46363 |
| AC233300.1   | -0.4638  |
| ADAMTSL4-AS1 | -0.46393 |
| N4BP2L1      | -0.46413 |
| AC062037.2   | -0.46455 |
| GFRA1        | -0.46459 |
| RIBC1        | -0.46462 |
| LINC01943    | -0.46488 |

|            |          |
|------------|----------|
| RNVU1-32   | -0.46546 |
| PIK3R6     | -0.46549 |
| RNU7-140P  | -0.46587 |
| LRRC34     | -0.46594 |
| IL18BP     | -0.46626 |
| TSGA10     | -0.46632 |
| AL163051.1 | -0.46639 |
| PTPRN2-AS1 | -0.46652 |
| TMEM229B   | -0.46692 |
| TRGC2      | -0.46708 |
| MLXP1      | -0.46726 |
| DAPL1      | -0.46746 |
| IQCG       | -0.46756 |
| GGTA1      | -0.46759 |
| STARD9     | -0.46761 |
| RXRG       | -0.46849 |
| DUOXA2     | -0.46869 |
| EVL        | -0.46875 |
| HCG27      | -0.46896 |
| PLCB2      | -0.46984 |
| AC012467.1 | -0.47009 |
| TNFRSF9    | -0.47035 |
| TMEM150C   | -0.47036 |
| CXCL17     | -0.47043 |
| PKIG       | -0.47052 |
| GRB14      | -0.47052 |
| ITPRIPL1   | -0.47068 |
| CMAHP      | -0.47128 |
| LRRC36     | -0.47154 |
| AF131215.6 | -0.47154 |
| BTG2       | -0.47193 |
| FAM227A    | -0.47252 |
| CEACAM5    | -0.47327 |
| PPM1K      | -0.47368 |
| FSD1L      | -0.47445 |
| HLA-F      | -0.47535 |
| AP000866.3 | -0.47558 |
| MTRNR2L8   | -0.47595 |
| AP001381.1 | -0.47621 |
| LRRC37A4P  | -0.47648 |
| CYP4Z2P    | -0.47664 |
| CHRD1      | -0.4767  |
| CEP85L     | -0.47679 |
| C9orf116   | -0.47688 |
| LST1       | -0.47705 |
| AC016831.1 | -0.47708 |
| AC048344.4 | -0.47745 |
| FLT3LG     | -0.4775  |
| TNFAIP8L2  | -0.47773 |

|            |          |
|------------|----------|
| RFX3       | -0.47783 |
| SNORD53B   | -0.47839 |
| RNF213-AS1 | -0.47858 |
| RNY1P13    | -0.47867 |
| ATP8A2     | -0.47955 |
| LINC02398  | -0.47985 |
| RN7SKP70   | -0.47988 |
| MIR548AT   | -0.47991 |
| ADCY6-DT   | -0.48042 |
| AC067817.2 | -0.48094 |
| AC005722.2 | -0.48124 |
| CCL3L3     | -0.48132 |
| HLA-DQA2   | -0.48133 |
| RIMKLBP2   | -0.48174 |
| PTPN22     | -0.48177 |
| SLC9A9     | -0.48217 |
| FAIM2      | -0.48262 |
| RIC3       | -0.48299 |
| AC012557.1 | -0.48305 |
| AC005332.4 | -0.48333 |
| AC124283.3 | -0.48357 |
| FILIP1     | -0.48369 |
| AC138393.2 | -0.48388 |
| IFFO1      | -0.48431 |
| AL353763.2 | -0.48441 |
| SPRR1B     | -0.4848  |
| MYRIP      | -0.48485 |
| PDE4DIPP2  | -0.48506 |
| AC104958.2 | -0.48518 |
| TSC22D3    | -0.48525 |
| RNU6-418P  | -0.48568 |
| BPIFB1     | -0.48583 |
| AL049776.1 | -0.48646 |
| IHH        | -0.48664 |
| AURKC      | -0.48696 |
| TXK        | -0.48702 |
| AC008770.3 | -0.48724 |
| IGFLR1     | -0.48757 |
| RN7SL431P  | -0.48765 |
| CHMP4BP1   | -0.48817 |
| LIN7A      | -0.48818 |
| HLA-DQB1   | -0.48844 |
| CD1C       | -0.48904 |
| TFF3       | -0.48914 |
| AC027020.2 | -0.48925 |
| PRKCQ      | -0.48962 |
| RNU7-3P    | -0.48988 |
| ARMH1      | -0.48988 |
| RGS7       | -0.49014 |

|            |          |
|------------|----------|
| NME5       | -0.49026 |
| CFAP300    | -0.49026 |
| AL355075.2 | -0.49066 |
| PLEKHS1    | -0.49087 |
| SFMBT2     | -0.49131 |
| RASSF2     | -0.49178 |
| C2orf88    | -0.49213 |
| RNU4-47P   | -0.49226 |
| DNAH5      | -0.49246 |
| CD101      | -0.49256 |
| MIR4477B   | -0.49274 |
| HERPUD1    | -0.49283 |
| CDC14A     | -0.49286 |
| DOK6       | -0.493   |
| NPC1L1     | -0.49329 |
| IFI30      | -0.49343 |
| RNU6-658P  | -0.49408 |
| C1QB       | -0.49425 |
| PIK3AP1    | -0.49509 |
| STUM       | -0.49524 |
| PLAAT5     | -0.49555 |
| HSH2D      | -0.49563 |
| AC130456.2 | -0.49611 |
| PIPOX      | -0.49652 |
| KCNAB2     | -0.49656 |
| SLC1A3     | -0.49657 |
| SNORA5C    | -0.49698 |
| ITGB2-AS1  | -0.4973  |
| S1PR4      | -0.49771 |
| AC004921.1 | -0.49808 |
| AC092279.2 | -0.49843 |
| SMIM10L2A  | -0.49856 |
| C1QA       | -0.49866 |
| AC107464.2 | -0.49928 |
| PAPLN      | -0.49931 |
| AC108134.4 | -0.49936 |
| CHGA       | -0.49941 |
| AC109326.1 | -0.49978 |
| GIMAP2     | -0.50003 |
| NLRP3      | -0.50007 |
| RN7SL145P  | -0.50011 |
| AL606834.2 | -0.50027 |
| KLHDC7B-DT | -0.50032 |
| HS3ST6     | -0.50033 |
| WIPF1      | -0.50038 |
| PCAT19     | -0.50042 |
| RNASE6     | -0.50069 |
| AC007546.1 | -0.50123 |
| SIGLEC14   | -0.50208 |

|             |          |
|-------------|----------|
| CD4         | -0.50209 |
| SMAP2       | -0.50222 |
| RNU6-856P   | -0.50226 |
| AC005632.3  | -0.50235 |
| PRDX3P1     | -0.50244 |
| NCF4        | -0.5026  |
| MMP9        | -0.50282 |
| PLEKHH2     | -0.5029  |
| CFTR        | -0.50304 |
| CSTA        | -0.50308 |
| AC120498.2  | -0.5036  |
| BHLHE40-AS1 | -0.50371 |
| ABI3        | -0.50394 |
| AL021707.8  | -0.5043  |
| AL021707.7  | -0.50444 |
| AC098591.3  | -0.50462 |
| RNU6-883P   | -0.505   |
| AL136115.2  | -0.50512 |
| VNN2        | -0.50556 |
| TCF21       | -0.50558 |
| HIF1A-AS3   | -0.50558 |
| CAMP        | -0.50619 |
| AC080162.1  | -0.50633 |
| MS4A6A      | -0.50641 |
| PTPRZ1      | -0.5066  |
| MAL2-AS1    | -0.50693 |
| AL513320.1  | -0.50718 |
| HS3ST2      | -0.50725 |
| RNU6-94P    | -0.50743 |
| PBX4        | -0.50745 |
| CLEC12A     | -0.50756 |
| HLA-DRB5    | -0.50819 |
| P2RX7       | -0.50879 |
| CD1E        | -0.50898 |
| TFAP2E-AS1  | -0.50929 |
| RRN3P1      | -0.50935 |
| UST-AS2     | -0.50975 |
| NPL         | -0.50987 |
| F11         | -0.51022 |
| LAIR1       | -0.51091 |
| NMUR1       | -0.51102 |
| AC026470.2  | -0.51109 |
| AC137894.1  | -0.51117 |
| UGT2B7      | -0.51211 |
| N4BP2L2-IT2 | -0.51215 |
| INTS6L      | -0.51423 |
| CA3         | -0.51499 |
| FGR         | -0.51545 |
| ALOX15      | -0.51552 |

|            |          |
|------------|----------|
| RNU6-1010P | -0.51619 |
| FRZB       | -0.51622 |
| SNORD63    | -0.51646 |
| KIF21B     | -0.51677 |
| NEAT1      | -0.51691 |
| AC127002.1 | -0.51704 |
| AC026202.2 | -0.51749 |
| CATSPERB   | -0.518   |
| LRRC4      | -0.51802 |
| COLEC11    | -0.51826 |
| MFNG       | -0.51863 |
| AGER       | -0.51883 |
| PREX1      | -0.51904 |
| AC022706.1 | -0.51921 |
| VN1R83P    | -0.51956 |
| PPIAP51    | -0.51963 |
| SLC6A4     | -0.51977 |
| IL2RA      | -0.52001 |
| ADRB2      | -0.52069 |
| HLA-DRA    | -0.52083 |
| AC125611.1 | -0.52139 |
| AP002907.1 | -0.52241 |
| RNY1P16    | -0.52339 |
| APBB1IP    | -0.52347 |
| RAB37      | -0.5238  |
| AC020978.9 | -0.52409 |
| AL133330.1 | -0.52437 |
| AC032044.2 | -0.52455 |
| KRT14      | -0.52462 |
| AC010970.1 | -0.52486 |
| CEP128     | -0.52495 |
| MIR378H    | -0.52546 |
| RNU6-195P  | -0.52595 |
| SYP        | -0.52699 |
| NPM1P25    | -0.52759 |
| XAF1       | -0.52779 |
| NFAM1      | -0.52837 |
| SAA1       | -0.52878 |
| RIMKLA     | -0.52903 |
| CHI3L2     | -0.52933 |
| HTR3A      | -0.52991 |
| AF131215.5 | -0.53103 |
| FZD9       | -0.53122 |
| AL157786.1 | -0.53124 |
| FCN3       | -0.53173 |
| NLRP1      | -0.53206 |
| MARCHF1    | -0.53221 |
| NEUROD1    | -0.53222 |
| PLEKHG7    | -0.53244 |

|            |          |
|------------|----------|
| TRBV30     | -0.53291 |
| CCL4L2     | -0.53297 |
| IL10       | -0.53299 |
| AC027801.1 | -0.53449 |
| AC022733.1 | -0.53474 |
| GPR162     | -0.53493 |
| SELP       | -0.5355  |
| GPNMB      | -0.53554 |
| AL513008.1 | -0.53608 |
| HVCN1      | -0.53615 |
| MIPOL1     | -0.53636 |
| AC243967.2 | -0.53637 |
| HLA-DPB1   | -0.53649 |
| FCRL6      | -0.53662 |
| ZNF101     | -0.53683 |
| RNU6-595P  | -0.53721 |
| AC010761.3 | -0.53788 |
| NPM2       | -0.53799 |
| ARMC2      | -0.53807 |
| SOCS1      | -0.5382  |
| RNU6-833P  | -0.53872 |
| B3GALT2    | -0.53872 |
| RN7SL834P  | -0.53884 |
| MPEG1      | -0.53925 |
| AL512791.1 | -0.53946 |
| NPTX1      | -0.53958 |
| CYBB       | -0.54005 |
| AC104984.4 | -0.54041 |
| SOX14      | -0.54114 |
| SSX1       | -0.54129 |
| KLHL13     | -0.54148 |
| DHRS2      | -0.54173 |
| AC244197.2 | -0.54208 |
| RNU6-216P  | -0.54211 |
| AC006270.1 | -0.54309 |
| AL138721.1 | -0.54333 |
| SCARA5     | -0.5445  |
| PRF1       | -0.54477 |
| MIR374B    | -0.54575 |
| MT-TM      | -0.54628 |
| AL662844.3 | -0.54633 |
| TRIM22     | -0.54652 |
| GIMAP6     | -0.54705 |
| PLCL2      | -0.54719 |
| AC083843.2 | -0.54852 |
| AC012236.1 | -0.54854 |
| FERMT3     | -0.5486  |
| TRDV1      | -0.54882 |
| AC018926.3 | -0.54913 |



|            |          |
|------------|----------|
| RIPOR2     | -0.54922 |
| RORA       | -0.54922 |
| AC005674.1 | -0.54944 |
| TLR7       | -0.54945 |
| ATP2A3     | -0.55009 |
| AL138963.1 | -0.55012 |
| SFTPD      | -0.5502  |
| GPIHBP1    | -0.55025 |
| GIMAP8     | -0.55042 |
| ANKRD36    | -0.55047 |
| CAPS       | -0.55061 |
| AC008760.2 | -0.55075 |
| AC002480.1 | -0.55087 |
| GPR141     | -0.55097 |
| MMP25      | -0.55113 |
| FLI1       | -0.55129 |
| CARD8-AS1  | -0.55218 |
| PRRT2      | -0.55262 |
| CMKLR1     | -0.55408 |
| AC016957.2 | -0.5543  |
| GBP1P1     | -0.55501 |
| LINC02166  | -0.55526 |
| HLA-DPA1   | -0.55581 |
| SNORA31    | -0.55593 |
| EAF2       | -0.55687 |
| AC090181.2 | -0.55709 |
| DNAH11     | -0.55716 |
| LINC02888  | -0.55726 |
| AL157935.2 | -0.55749 |
| DHDDS-AS1  | -0.5575  |
| RNU7-75P   | -0.55775 |
| CD38       | -0.55805 |
| RALGAPA1   | -0.55812 |
| AL079303.1 | -0.55813 |
| PROX1      | -0.55822 |
| GPR155     | -0.55825 |
| CD80       | -0.55849 |
| RNA5SP498  | -0.55858 |
| NRN1       | -0.55967 |
| LCP1       | -0.56228 |
| AL135999.3 | -0.5626  |
| SEMA3E     | -0.56272 |
| RNU6-1262P | -0.56275 |
| PDE6G      | -0.56332 |
| RPL29P14   | -0.56342 |
| ADCY5      | -0.56353 |
| TMEM273    | -0.56383 |
| HCST       | -0.56459 |
| HCLS1      | -0.56459 |

|            |          |
|------------|----------|
| CES3       | -0.56463 |
| AL445493.3 | -0.56491 |
| SCNN1G     | -0.56505 |
| ITGA4      | -0.56534 |
| RN7SL8P    | -0.56542 |
| RNU4-62P   | -0.56562 |
| AC090948.1 | -0.56606 |
| IRF9       | -0.56727 |
| HCAR2      | -0.56738 |
| PLAAT4     | -0.56761 |
| AC011447.7 | -0.56821 |
| PRAP1      | -0.56916 |
| ATP10B     | -0.56933 |
| TRGV7      | -0.57009 |
| HLA-DQB2   | -0.57035 |
| AP001458.1 | -0.57061 |
| DUSP2      | -0.57132 |
| MYO1F      | -0.57157 |
| RNU6-853P  | -0.57186 |
| SERPIND1   | -0.57229 |
| RPS15AP16  | -0.57236 |
| AK3P5      | -0.57259 |
| DNAAF3     | -0.57272 |
| TRPC6      | -0.57297 |
| AL049869.2 | -0.57298 |
| AL135818.1 | -0.57366 |
| AC133065.3 | -0.57385 |
| DCSTAMP    | -0.5742  |
| RSPH9      | -0.57466 |
| PPIAP91    | -0.57476 |
| AP001767.3 | -0.57479 |
| ADGRV1     | -0.57494 |
| LIMD2      | -0.57495 |
| AL049840.6 | -0.57583 |
| ITLN2      | -0.57609 |
| HLA-DMB    | -0.57694 |
| CEACAM21   | -0.57709 |
| BHLHE22    | -0.57742 |
| TCF7       | -0.57784 |
| AC090739.1 | -0.57806 |
| MIR30C2    | -0.57807 |
| GCSAM      | -0.5781  |
| LPXN       | -0.57815 |
| LCP2       | -0.57828 |
| GNG4       | -0.57847 |
| CILP       | -0.57856 |
| CCL4       | -0.57875 |
| DMBT1      | -0.57916 |
| VAMP1      | -0.58156 |

|              |          |
|--------------|----------|
| MAP6         | -0.58165 |
| BHLHA15      | -0.58234 |
| LIMS1-AS1    | -0.58271 |
| IL36RN       | -0.58282 |
| SNORD93      | -0.58287 |
| PTCRA        | -0.58312 |
| FCGR2B       | -0.58334 |
| SLC23A1      | -0.58355 |
| TDO2         | -0.58376 |
| GNG8         | -0.58392 |
| COLGALT2     | -0.58404 |
| EPYC         | -0.58454 |
| MTATP8P2     | -0.58465 |
| RGS18        | -0.58477 |
| FAM81B       | -0.58562 |
| SENCR        | -0.58597 |
| APOC1        | -0.586   |
| TUBB2B       | -0.58602 |
| SNORA55      | -0.58698 |
| S100A7       | -0.58739 |
| ICA1L        | -0.58772 |
| HSD11B1      | -0.5879  |
| PGLYRP3      | -0.58872 |
| SLC22A4      | -0.58892 |
| KANSL1L-AS1  | -0.58957 |
| AC087276.1   | -0.58979 |
| MIR3671      | -0.58984 |
| TMEM178A     | -0.58993 |
| DZIP1L       | -0.59007 |
| CDH26        | -0.59011 |
| AC008115.3   | -0.59018 |
| LRRN3        | -0.59052 |
| U62317.3     | -0.59059 |
| RHOQ-AS1     | -0.59105 |
| CXCL11       | -0.59125 |
| RNU6-1209P   | -0.59148 |
| APOBEC3D     | -0.59212 |
| MYCL         | -0.59249 |
| PPIL6        | -0.59261 |
| SPN          | -0.59376 |
| APOE         | -0.59418 |
| ABCB1        | -0.59425 |
| EFCAB10      | -0.59485 |
| SLC25A21-AS1 | -0.59493 |
| MIR2355      | -0.59498 |
| CYTH4        | -0.59506 |
| MT1H         | -0.596   |
| IGSF6        | -0.59617 |
| AC078883.1   | -0.59625 |

|            |          |
|------------|----------|
| PLA2G7     | -0.59634 |
| FAM83F     | -0.59726 |
| AK7        | -0.59808 |
| AC019226.1 | -0.59825 |
| AC068790.2 | -0.59868 |
| WARS1      | -0.59872 |
| AC015982.1 | -0.59945 |
| PDIA2      | -0.59995 |
| GMFG       | -0.60052 |
| AC005838.2 | -0.60096 |
| AC020913.3 | -0.60097 |
| AP000866.6 | -0.60133 |
| DOCK8      | -0.60244 |
| APOL3      | -0.60256 |
| PSMB8-AS1  | -0.60358 |
| AC025580.1 | -0.60425 |
| PARVG      | -0.60496 |
| SNAI3      | -0.60533 |
| LINC00342  | -0.60549 |
| MIR1972-1  | -0.60581 |
| KCNK13     | -0.60634 |
| DLL3       | -0.60703 |
| PIK3R5     | -0.60736 |
| APOBEC3G   | -0.60743 |
| AC005070.3 | -0.60772 |
| DOK3       | -0.60784 |
| PTGES3P2   | -0.60788 |
| CTSG       | -0.6079  |
| ARHGEF6    | -0.6087  |
| KMO        | -0.60871 |
| SERPINE2   | -0.60903 |
| KRT15      | -0.61035 |
| SNORA11    | -0.61111 |
| OR2I1P     | -0.61149 |
| MIR4489    | -0.61261 |
| SNORA22B   | -0.61319 |
| RUNX3      | -0.61325 |
| DOCK10     | -0.61332 |
| RNU6-767P  | -0.6135  |
| RN7SL600P  | -0.61364 |
| AC145098.1 | -0.61372 |
| UCKL1-AS1  | -0.61398 |
| AKNA       | -0.61488 |
| SLAMF8     | -0.6152  |
| PABPC4-AS1 | -0.61641 |
| NEURL1     | -0.61678 |
| APOBEC3H   | -0.617   |
| PLA2G3     | -0.61729 |
| PNMA6A     | -0.61736 |

|            |          |
|------------|----------|
| DNAJC5B    | -0.61736 |
| RNU6-90P   | -0.61739 |
| RN7SL558P  | -0.61752 |
| AC104534.1 | -0.6176  |
| CCDC65     | -0.61786 |
| ITGAX      | -0.61801 |
| SCARNA20   | -0.6184  |
| ANKRD44    | -0.61864 |
| AC083798.1 | -0.61872 |
| AC087286.2 | -0.62239 |
| TREML1     | -0.62273 |
| GBP4       | -0.62278 |
| EVI2A      | -0.62286 |
| ARL4AP4    | -0.62304 |
| TLR8       | -0.62326 |
| TBX21      | -0.62352 |
| CIITA      | -0.62415 |
| RNA5SP118  | -0.62417 |
| GIMAP4     | -0.62524 |
| DNAI4      | -0.62634 |
| CALCA      | -0.62682 |
| OSBPL6     | -0.62686 |
| RNU6-118P  | -0.62701 |
| GPR183     | -0.62727 |
| CASP4LP    | -0.62749 |
| IGHG4      | -0.62829 |
| DPEP2      | -0.62836 |
| NLRC5      | -0.62859 |
| RRN3P2     | -0.62877 |
| RNU7-41P   | -0.6294  |
| KRT4       | -0.62957 |
| HSPA7      | -0.62997 |
| FGD3       | -0.63029 |
| RAB30      | -0.63162 |
| TTC21A     | -0.63211 |
| FAM107A    | -0.63213 |
| GAS6-AS1   | -0.6346  |
| IGHE       | -0.63476 |
| FGF18      | -0.63494 |
| AC010654.1 | -0.63505 |
| DNAH3      | -0.63698 |
| AC053527.1 | -0.63776 |
| JAML       | -0.63855 |
| SNORA26    | -0.63858 |
| CCDC160    | -0.63933 |
| IGSF10     | -0.63945 |
| AC110741.1 | -0.63989 |
| NCKAP5     | -0.64212 |
| SNORD70    | -0.64226 |

|              |          |
|--------------|----------|
| PLEK         | -0.64279 |
| RN7SL473P    | -0.64292 |
| TP53INP1     | -0.64356 |
| CCDC39       | -0.64359 |
| AC098851.1   | -0.64468 |
| RNA5SP282    | -0.64514 |
| NFASC        | -0.64532 |
| VIL1         | -0.64564 |
| BNIP3P17     | -0.64627 |
| HAMP         | -0.64686 |
| SAMSN1       | -0.64826 |
| SPRR3        | -0.64879 |
| AC108134.3   | -0.64897 |
| TPPP3        | -0.64934 |
| GRIA1        | -0.64971 |
| ADAMTS8      | -0.65124 |
| ARHGAP30     | -0.6513  |
| ERFE         | -0.65178 |
| CCDC89       | -0.65202 |
| CXCL10       | -0.65273 |
| TMC8         | -0.6537  |
| AL136296.1   | -0.65388 |
| AC015819.1   | -0.65488 |
| SPATA18      | -0.65494 |
| ASB2         | -0.65655 |
| BTNL9        | -0.65724 |
| MIR6124      | -0.65761 |
| AGAP2        | -0.65794 |
| GZMB         | -0.65815 |
| Z83843.1     | -0.65848 |
| AC025917.1   | -0.65851 |
| H2AC11       | -0.65887 |
| FYB1         | -0.65985 |
| AC069023.1   | -0.66044 |
| ADA2         | -0.66089 |
| LILRB4       | -0.66111 |
| GPR65        | -0.66116 |
| RNF183       | -0.6613  |
| AC080188.2   | -0.66138 |
| ARHGEF38-IT1 | -0.66149 |
| RN7SL3       | -0.66171 |
| FOXI3        | -0.66204 |
| HLA-DQB1-AS1 | -0.66374 |
| IRF1-AS1     | -0.66423 |
| P2RY12       | -0.66478 |
| PROC         | -0.66496 |
| AL121899.1   | -0.66538 |
| AL133371.2   | -0.66563 |
| FTX          | -0.6658  |

|            |          |
|------------|----------|
| HLA-DOA    | -0.66582 |
| AC133644.1 | -0.66601 |
| AC087273.2 | -0.6661  |
| ABCA6      | -0.66718 |
| CCT8P1     | -0.66736 |
| NCKAP1L    | -0.66773 |
| C5orf49    | -0.66774 |
| BMP5       | -0.66774 |
| AC099343.2 | -0.66809 |
| SAA2       | -0.6688  |
| SLA        | -0.66884 |
| RNU6-251P  | -0.6693  |
| AC083809.1 | -0.66971 |
| LINC02300  | -0.67043 |
| CRISP3     | -0.6736  |
| IL4I1      | -0.67396 |
| WAS        | -0.67398 |
| TASL       | -0.67409 |
| CR1        | -0.67517 |
| CD72       | -0.67574 |
| CCDC88B    | -0.67602 |
| AC084871.1 | -0.67682 |
| RNU6-100P  | -0.67686 |
| APOM       | -0.67755 |
| ADH1B      | -0.67982 |
| PGM5       | -0.67989 |
| PDCD1      | -0.67997 |
| TRAV19     | -0.68051 |
| TNFSF13B   | -0.68073 |
| ACAP2-IT1  | -0.68078 |
| ABCA9      | -0.68118 |
| SYNE3      | -0.68159 |
| DNAH1      | -0.68217 |
| BIN2       | -0.68219 |
| ACKR1      | -0.6824  |
| INPP5D     | -0.68277 |
| SLC5A5     | -0.68427 |
| GFRA3      | -0.68535 |
| AL683807.1 | -0.68595 |
| GIMAP1     | -0.6869  |
| CCDC151    | -0.6869  |
| EIF4EP1    | -0.68737 |
| ARMC4      | -0.68788 |
| BMP6       | -0.68838 |
| JAK3       | -0.68869 |
| AC037198.1 | -0.68889 |
| RNY1P9     | -0.68905 |
| CD53       | -0.68956 |
| COL6A6     | -0.68992 |

|             |          |
|-------------|----------|
| CFAP94      | -0.69002 |
| LRRC10B     | -0.69173 |
| CCL14       | -0.6921  |
| IDO1        | -0.69214 |
| CD52        | -0.69217 |
| RNU6-890P   | -0.69287 |
| KIF26B-AS1  | -0.69293 |
| CSF2RB      | -0.69311 |
| AC007684.2  | -0.69345 |
| LRRC43      | -0.69386 |
| RUBCNL      | -0.69397 |
| SNORD46     | -0.69424 |
| LILRB1      | -0.6946  |
| SDS         | -0.69502 |
| REC8        | -0.69631 |
| C2CD4B      | -0.6964  |
| RNU6ATAC24P | -0.69677 |
| H2AC13      | -0.69692 |
| KLRG1       | -0.6979  |
| RAB33A      | -0.69823 |
| ZNF460      | -0.69837 |
| ARHGAP25    | -0.69844 |
| DRC3        | -0.69866 |
| FAM78A      | -0.69897 |
| SNORA3B     | -0.69964 |
| AC002064.2  | -0.70035 |
| PLA1A       | -0.70053 |
| XCL2        | -0.70127 |
| IL12RB1     | -0.70141 |
| CD84        | -0.70175 |
| CXCR3       | -0.70298 |
| GAB3        | -0.70396 |
| DNASE2B     | -0.70419 |
| NKG7        | -0.70475 |
| ATP5MFP2    | -0.70576 |
| SIGLEC10    | -0.7066  |
| CDCA4P1     | -0.70677 |
| PITX2       | -0.70684 |
| PRDM1       | -0.70753 |
| SNRPEP10    | -0.70756 |
| SNX20       | -0.70877 |
| ADAM33      | -0.70891 |
| EBI3        | -0.71015 |
| TMEM156     | -0.71075 |
| AGBL2       | -0.71108 |
| AC090948.2  | -0.71143 |
| SAA2-SAA4   | -0.71153 |
| AC004836.1  | -0.71229 |
| AC063965.2  | -0.71286 |



|            |          |
|------------|----------|
| TTC6       | -0.7145  |
| CST1       | -0.71476 |
| HLA-DQA1   | -0.71552 |
| JAKMIP1    | -0.71571 |
| SNAP25     | -0.71598 |
| LAG3       | -0.71634 |
| RPL38P5    | -0.71752 |
| KBTBD8     | -0.71787 |
| CCL5       | -0.71796 |
| AL606469.1 | -0.71856 |
| MAK        | -0.71898 |
| ABI3BP     | -0.71942 |
| TCTEX1D4   | -0.71973 |
| C5         | -0.71978 |
| FOXP3      | -0.7205  |
| PLCG2      | -0.72175 |
| IFITM3P6   | -0.725   |
| TSPAN32    | -0.72736 |
| CD200R1    | -0.72813 |
| AL023653.1 | -0.72816 |
| REN        | -0.72851 |
| CPM        | -0.72913 |
| P2RY13     | -0.72958 |
| IP6K3      | -0.73011 |
| AC012181.2 | -0.73075 |
| MCOLN2     | -0.73361 |
| KLK12      | -0.73407 |
| CD244      | -0.7349  |
| IL2RB      | -0.73565 |
| SLA2       | -0.73695 |
| RNU6-548P  | -0.73903 |
| RNU7-18P   | -0.73964 |
| CATIP      | -0.73966 |
| BTK        | -0.74007 |
| AC073651.1 | -0.74013 |
| AC087392.1 | -0.74028 |
| CCDC146    | -0.7407  |
| RBP5       | -0.74085 |
| ECRG4      | -0.74088 |
| CCDC114    | -0.74089 |
| FGD2       | -0.74242 |
| FCGR2C     | -0.74246 |
| MIR5692A1  | -0.74418 |
| IGF2       | -0.74535 |
| DOCK2      | -0.74552 |
| DBH-AS1    | -0.74598 |
| AC090181.3 | -0.74606 |
| GIMAP7     | -0.7466  |
| NEFL       | -0.74738 |

|            |          |
|------------|----------|
| ZBTB20     | -0.7478  |
| CD1D       | -0.74854 |
| USP30-AS1  | -0.74861 |
| TTC25      | -0.74972 |
| SNORD11    | -0.74973 |
| LINC02446  | -0.75002 |
| C16orf54   | -0.75045 |
| ARHGAP15   | -0.75075 |
| RNU6-1189P | -0.75119 |
| AC087286.4 | -0.75187 |
| IGLV1-41   | -0.75241 |
| NAPSB      | -0.75299 |
| MIR421     | -0.75509 |
| RNU7-71P   | -0.75705 |
| LINC01871  | -0.75733 |
| KCNN3      | -0.75772 |
| RNU7-48P   | -0.75794 |
| AL158801.1 | -0.75919 |
| CORO1A     | -0.76123 |
| PROM1      | -0.762   |
| AC020978.3 | -0.76212 |
| AL590764.1 | -0.76252 |
| CFAP57     | -0.76423 |
| IL2RG      | -0.76624 |
| IGHD3-10   | -0.76703 |
| PIFO       | -0.76758 |
| AGTR1      | -0.76815 |
| RPS27AP10  | -0.77103 |
| IGLV5-52   | -0.77116 |
| GZMH       | -0.77147 |
| NKX1-2     | -0.77176 |
| C7orf57    | -0.77265 |
| AL137247.1 | -0.77333 |
| GAL        | -0.77348 |
| CHIT1      | -0.77376 |
| ACBD3-AS1  | -0.7752  |
| CCR5       | -0.77538 |
| PSTPIP1    | -0.77543 |
| AC018755.4 | -0.77583 |
| AC004034.1 | -0.77662 |
| SYT13      | -0.77716 |
| SCIMP      | -0.77742 |
| FYB2       | -0.78077 |
| AOAH       | -0.78079 |
| ITGB7      | -0.781   |
| SIGLEC8    | -0.78247 |
| CLEC2D     | -0.78306 |
| HTRA4      | -0.78362 |
| SFRP5      | -0.78419 |

|             |          |
|-------------|----------|
| RNU6-1016P  | -0.78456 |
| GAPT        | -0.78546 |
| SLCO4A1-AS1 | -0.78587 |
| SOX2        | -0.78712 |
| IL7R        | -0.78765 |
| ATP5MDP1    | -0.78779 |
| SPAG17      | -0.78826 |
| AL096712.1  | -0.78851 |
| GLYATL2     | -0.78987 |
| AC092569.1  | -0.79023 |
| CCR8        | -0.79108 |
| RNU6-247P   | -0.7921  |
| PAX9        | -0.79242 |
| HNRNPA1P21  | -0.79314 |
| IL10RA      | -0.79351 |
| CARMIL2     | -0.79397 |
| AC087752.3  | -0.79398 |
| PPP1R32     | -0.79578 |
| AC012181.1  | -0.79721 |
| AC245014.3  | -0.79799 |
| CFAP53      | -0.80004 |
| IL22RA2     | -0.80014 |
| AC092535.1  | -0.80101 |
| CCL17       | -0.80106 |
| AC016831.4  | -0.80131 |
| STK32B      | -0.80158 |
| H2AC17      | -0.80216 |
| CCR2        | -0.80285 |
| AC090948.3  | -0.80294 |
| AL133342.1  | -0.80328 |
| SNORD116-24 | -0.80347 |
| RNU6ATAC39P | -0.80358 |
| CRISP2      | -0.80366 |
| DRAIC       | -0.80433 |
| NHLRC4      | -0.80454 |
| PRKCB       | -0.80542 |
| HMGN1P8     | -0.80599 |
| RNVU1-30    | -0.80657 |
| AC135068.5  | -0.80703 |
| GPR82       | -0.80705 |
| ADGRB1      | -0.80775 |
| BCL11B      | -0.80844 |
| RWDD4P1     | -0.80931 |
| BCL2        | -0.81041 |
| CCDC173     | -0.81052 |
| EVI2B       | -0.81064 |
| CFAP70      | -0.81207 |
| TRPM8       | -0.81274 |
| AL133445.2  | -0.81363 |

|            |          |
|------------|----------|
| RNU1-67P   | -0.81442 |
| AC109446.2 | -0.81451 |
| CD180      | -0.8147  |
| CLEC10A    | -0.81541 |
| BANK1      | -0.81549 |
| SMTNL1     | -0.81839 |
| TMEM100    | -0.81861 |
| RNU6-1005P | -0.82112 |
| GAS2L2     | -0.82191 |
| IL24       | -0.8221  |
| TRAV13-1   | -0.82281 |
| AMBP       | -0.82373 |
| LGALS7B    | -0.82413 |
| RNU6-638P  | -0.82462 |
| SLC5A1     | -0.82537 |
| CHRNA9     | -0.82549 |
| RNA5SP217  | -0.8256  |
| RNU6-761P  | -0.82664 |
| NTRK2      | -0.82678 |
| EML4-AS1   | -0.82687 |
| RN7SL521P  | -0.827   |
| CRTAM      | -0.82867 |
| ANK2       | -0.82958 |
| MIR548V    | -0.82961 |
| SASH3      | -0.83003 |
| RPL13AP17  | -0.83109 |
| TENT5C     | -0.83194 |
| LCK        | -0.83199 |
| AC005261.5 | -0.83221 |
| RNY4P25    | -0.83247 |
| PIK3CG     | -0.83323 |
| KCNRG      | -0.83446 |
| FHAD1      | -0.83827 |
| ADAMTS7P3  | -0.83839 |
| RNU6-341P  | -0.83862 |
| PWAR5      | -0.83873 |
| SLC4A8     | -0.84301 |
| H2BC7      | -0.84304 |
| PRUNE2     | -0.84394 |
| AC007384.1 | -0.8443  |
| TRAV12-3   | -0.84454 |
| TFEC       | -0.84454 |
| CFAP45     | -0.84523 |
| TRGV10     | -0.84553 |
| IRF8       | -0.84793 |
| ITCH-IT1   | -0.84803 |
| CD8A       | -0.84882 |
| GHRL       | -0.84886 |
| EFHB       | -0.84903 |

|            |          |
|------------|----------|
| MMP2-AS1   | -0.84909 |
| AC005920.2 | -0.84925 |
| CD28       | -0.8497  |
| PTPN7      | -0.84978 |
| TRAV39     | -0.85077 |
| SNORA71C   | -0.85098 |
| CALHM6     | -0.85164 |
| CXCR4      | -0.85186 |
| TRBV5-6    | -0.85192 |
| RPL35AP2   | -0.85447 |
| LGALS2     | -0.85473 |
| SLC39A5    | -0.85564 |
| FFAR2      | -0.85578 |
| KLK13      | -0.85719 |
| TAGAP      | -0.85761 |
| MTATP8P1   | -0.85797 |
| HDC        | -0.85799 |
| IL21R      | -0.858   |
| TMED11P    | -0.8581  |
| FAM183A    | -0.85892 |
| PCED1B-AS1 | -0.86034 |
| LINC01480  | -0.8604  |
| AL353804.2 | -0.86117 |
| GBP5       | -0.86247 |
| SNRPGP4    | -0.86332 |
| SEC11C     | -0.86402 |
| SNORD89    | -0.86419 |
| LTB        | -0.86656 |
| ARHGAP9    | -0.86738 |
| C11orf21   | -0.86881 |
| FGL1       | -0.86977 |
| SPEF1      | -0.86992 |
| H2BC17     | -0.87037 |
| FGL2       | -0.87281 |
| IFNG       | -0.87352 |
| NELL2      | -0.8736  |
| H2AC7      | -0.87371 |
| LINC00216  | -0.87437 |
| CCDC78     | -0.87444 |
| TRAV29DV5  | -0.87451 |
| CD37       | -0.87508 |
| RCSD1      | -0.87535 |
| TRBV9      | -0.87704 |
| FGB        | -0.87824 |
| CCDC181    | -0.87863 |
| AC004585.1 | -0.88077 |
| TRBV7-6    | -0.88231 |
| CABCOC01   | -0.88289 |
| RNU6-82P   | -0.88506 |

|            |          |
|------------|----------|
| TRAV21     | -0.88529 |
| CD1B       | -0.88547 |
| AC009994.1 | -0.88549 |
| GZMA       | -0.88596 |
| NCF1       | -0.88663 |
| CNGA3      | -0.88765 |
| CD8B       | -0.88844 |
| LILRA4     | -0.88931 |
| DNASE1L3   | -0.88986 |
| PCP4       | -0.89038 |
| SNORA80E   | -0.89207 |
| SP140      | -0.89235 |
| GPR171     | -0.89284 |
| FASLG      | -0.8933  |
| SELL       | -0.89332 |
| ARMC3      | -0.89366 |
| COL6A5     | -0.89371 |
| BPIFB2     | -0.89415 |
| AL732366.1 | -0.8959  |
| AC015911.7 | -0.89602 |
| VNN3       | -0.89669 |
| TRAV12-2   | -0.89689 |
| CD69       | -0.89698 |
| NCF1C      | -0.897   |
| NCF1B      | -0.89929 |
| SCGN       | -0.9012  |
| HLA-DOB    | -0.90309 |
| UBD        | -0.90433 |
| PTPRC      | -0.90466 |
| P2RX1      | -0.90591 |
| BNIP3P40   | -0.90757 |
| AL157871.2 | -0.90852 |
| RSPH1      | -0.9087  |
| TNFSF8     | -0.90996 |
| LINC02351  | -0.91048 |
| CHST9      | -0.91052 |
| POU2F2     | -0.91054 |
| AC004130.1 | -0.91056 |
| SPP2       | -0.91189 |
| SLC38A4    | -0.91221 |
| MIR5195    | -0.91258 |
| AC007906.2 | -0.91371 |
| SLC5A8     | -0.91405 |
| CD3G       | -0.91508 |
| RN7SL151P  | -0.9154  |
| CD247      | -0.91555 |
| CPLX2      | -0.91732 |
| CDC20B     | -0.91761 |
| RN7SL381P  | -0.9181  |

|             |          |
|-------------|----------|
| C7          | -0.91846 |
| KRT5        | -0.92258 |
| TRBV11-2    | -0.92304 |
| CCDC170     | -0.9234  |
| TRAV1-2     | -0.92429 |
| TRBV6-5     | -0.92446 |
| RGS1        | -0.92608 |
| RNU1-88P    | -0.92637 |
| HSPE1P18    | -0.92681 |
| MALAT1      | -0.92937 |
| SLFN12L     | -0.93038 |
| LRP2        | -0.93128 |
| RNY4P7      | -0.93233 |
| TOMM20P2    | -0.9324  |
| ZC3H12D     | -0.933   |
| ABCA13      | -0.93419 |
| TRBJ2-1     | -0.93492 |
| RNVU1-15    | -0.93522 |
| AL162578.1  | -0.93535 |
| AC004884.2  | -0.93629 |
| AC114402.1  | -0.93708 |
| AL022313.2  | -0.93866 |
| IGKV5-2     | -0.93965 |
| RNU4ATAC16P | -0.94019 |
| GFI1        | -0.94047 |
| IL16        | -0.94231 |
| LDLRAD1     | -0.94321 |
| AL732366.2  | -0.94339 |
| IKZF3       | -0.94345 |
| SPAG8       | -0.94402 |
| AC131971.1  | -0.94619 |
| AC015722.2  | -0.94752 |
| ITGAL       | -0.94766 |
| MPHOSPH6P1  | -0.94825 |
| TESPA1      | -0.94907 |
| NLRC3       | -0.94909 |
| AL121790.2  | -0.94933 |
| RNVU1-2     | -0.94954 |
| AC012645.3  | -0.95041 |
| GP1BA       | -0.95048 |
| TRAC        | -0.95171 |
| TRG-AS1     | -0.95177 |
| TRAV8-6     | -0.95222 |
| IKZF1       | -0.95248 |
| RASAL3      | -0.95274 |
| CCDC17      | -0.95295 |
| RHOH        | -0.9531  |
| CACNG6      | -0.95337 |
| RNU4ATAC12P | -0.95353 |

|            |          |
|------------|----------|
| UBASH3A    | -0.95468 |
| CXCR6      | -0.95479 |
| ZCCHC12    | -0.95503 |
| LRRIQ1     | -0.95603 |
| NEK5       | -0.95632 |
| GRAP2      | -0.95649 |
| LINC02541  | -0.95707 |
| MDH1B      | -0.95751 |
| HLA-DPA3   | -0.95806 |
| CFAP157    | -0.95868 |
| CLEC4E     | -0.95981 |
| CD2        | -0.96223 |
| RN7SL128P  | -0.96223 |
| ZNF474     | -0.96228 |
| CD96       | -0.9623  |
| TRBJ2-3    | -0.96259 |
| RNU6-759P  | -0.96302 |
| WDFY4      | -0.96475 |
| CDHR3      | -0.96541 |
| TRBC2      | -0.96761 |
| MACC1-AS1  | -0.96816 |
| CYTIP      | -0.96835 |
| TEKT2      | -0.96839 |
| AC122718.2 | -0.96917 |
| CFLAR-AS1  | -0.97034 |
| RAB39B     | -0.97046 |
| MIR553     | -0.97149 |
| CTNND2     | -0.97299 |
| POLRMTP1   | -0.9738  |
| MIR155HG   | -0.97515 |
| CD3D       | -0.97525 |
| STMN2      | -0.9769  |
| TRBV7-3    | -0.97824 |
| CCR4       | -0.98218 |
| ZMYND10    | -0.98309 |
| P2RY8      | -0.98379 |
| TRAV13-2   | -0.98481 |
| ICOS       | -0.98592 |
| RN7SL141P  | -0.9871  |
| CD6        | -0.99065 |
| TRAV8-4    | -0.99229 |
| RN7SL663P  | -0.99237 |
| PNMA3      | -0.99265 |
| TRAV41     | -0.99288 |
| RNU6-130P  | -0.9936  |
| JSRP1      | -0.99392 |
| RPL32P1    | -0.99398 |
| AC108471.1 | -0.99415 |
| MIR5692C2  | -0.99465 |



|              |          |
|--------------|----------|
| AL645924.1   | -0.99466 |
| RN7SL116P    | -0.99517 |
| CPNE5        | -0.99801 |
| ATP6V0E1P1   | -0.99846 |
| CADM3        | -0.9989  |
| RNU4-24P     | -1.00044 |
| TRAV4        | -1.00164 |
| TIGIT        | -1.00251 |
| AL022067.1   | -1.00296 |
| C6           | -1.00355 |
| SNORA70G     | -1.00367 |
| AC005326.1   | -1.00499 |
| AL021068.1   | -1.00714 |
| AP001429.1   | -1.00772 |
| TCTEX1D1     | -1.00773 |
| DYDC2        | -1.00814 |
| TRBV29-1     | -1.01065 |
| AC034105.1   | -1.01212 |
| SNORD38D     | -1.01248 |
| RNU7-45P     | -1.01291 |
| AL606517.2   | -1.01311 |
| APOA1        | -1.01344 |
| NWD1         | -1.0145  |
| PIM2         | -1.01462 |
| MT-TV        | -1.01535 |
| CD3E         | -1.01641 |
| CXCL9        | -1.01793 |
| NAALADL2-AS2 | -1.01832 |
| IGHV1OR15-2  | -1.02036 |
| PPP1R16B     | -1.02099 |
| TRBV6-1      | -1.02192 |
| IGLC7        | -1.02448 |
| MIR7848      | -1.02496 |
| DERL3        | -1.02521 |
| KLRB1        | -1.02582 |
| AC141557.1   | -1.02618 |
| SIRPG        | -1.02628 |
| DLEC1        | -1.02744 |
| TRBV7-9      | -1.02772 |
| MS4A8        | -1.02868 |
| RN7SKP80     | -1.03057 |
| CLCA2        | -1.03157 |
| TBC1D10C     | -1.03193 |
| MAP4K1       | -1.03212 |
| MIR4420      | -1.03213 |
| RNU7-79P     | -1.03235 |
| IL18RAP      | -1.03319 |
| MIR4802      | -1.03344 |
| ICAM3        | -1.03393 |

|              |          |
|--------------|----------|
| IGHV3-65     | -1.03398 |
| PARP15       | -1.03459 |
| AC007684.1   | -1.03498 |
| TRAV9-2      | -1.03533 |
| NOTUM        | -1.03608 |
| BAALC        | -1.03637 |
| ACAP1        | -1.03834 |
| PATL2        | -1.03894 |
| TRAV16       | -1.03919 |
| RN7SL674P    | -1.03934 |
| AC068587.2   | -1.04116 |
| LINC01215    | -1.04239 |
| SPAG6        | -1.04261 |
| LRRC46       | -1.04343 |
| RNU6-795P    | -1.04449 |
| SAXO2        | -1.04456 |
| EOMES        | -1.04492 |
| LTA          | -1.04594 |
| TRAV17       | -1.04598 |
| PACRG        | -1.04731 |
| STMND1       | -1.04747 |
| NOS2         | -1.04951 |
| RN7SL665P    | -1.05003 |
| TIMM9P2      | -1.05132 |
| IGLV2-23     | -1.05251 |
| SIT1         | -1.05453 |
| ANXA13       | -1.05554 |
| CFAP91       | -1.05728 |
| DNAI3        | -1.05758 |
| SNORD71      | -1.05805 |
| H2AC20       | -1.06065 |
| TRBV19       | -1.06089 |
| AC011939.2   | -1.06145 |
| RN7SL564P    | -1.0618  |
| IGKV3OR2-268 | -1.06185 |
| TRBV3-1      | -1.0619  |
| ROPN1L       | -1.06199 |
| RNU6-608P    | -1.0621  |
| TRBV12-4     | -1.06226 |
| GIMAP5       | -1.06245 |
| IGLV3-9      | -1.06425 |
| RN7SL396P    | -1.06469 |
| MIR1205      | -1.06525 |
| TRBV28       | -1.06532 |
| TRBV18       | -1.06671 |
| DYNLRB2      | -1.06691 |
| TRAV3        | -1.06745 |
| ENKUR        | -1.0677  |
| CDK5R2       | -1.06843 |

|            |          |
|------------|----------|
| IGKV2D-40  | -1.06843 |
| RNU7-181P  | -1.07011 |
| H2BC6      | -1.07061 |
| SNORD67    | -1.07116 |
| SNORA5A    | -1.07301 |
| CD5        | -1.07307 |
| TRBJ2-2P   | -1.07336 |
| TRBJ2-2    | -1.07396 |
| IGKV2D-24  | -1.07537 |
| CNGA4      | -1.07583 |
| SLC13A2    | -1.07647 |
| THEMIS     | -1.07728 |
| P2RX5      | -1.07935 |
| SEPTIN1    | -1.08011 |
| IGHV3-79   | -1.08275 |
| MIR3142HG  | -1.0855  |
| AC007878.1 | -1.08643 |
| SNORD94    | -1.08955 |
| CYP2F1     | -1.09161 |
| CEL        | -1.09323 |
| TLR10      | -1.09365 |
| TRAV8-2    | -1.09532 |
| AC096741.1 | -1.09704 |
| PTGDS      | -1.09782 |
| BCL2L1-AS1 | -1.09835 |
| TTLL10     | -1.09849 |
| NKD1       | -1.09933 |
| KLHL6      | -1.09955 |
| RN7SL838P  | -1.09964 |
| FTH1P22    | -1.10004 |
| TAF5LP1    | -1.10279 |
| EFCAB1     | -1.10296 |
| RNU6-1176P | -1.10372 |
| TRAV14DV4  | -1.10414 |
| RNU6-107P  | -1.10426 |
| SLC38A3    | -1.10435 |
| DRC1       | -1.10447 |
| LINC00996  | -1.10471 |
| TRAJ31     | -1.10479 |
| C1orf194   | -1.10503 |
| H2BC13     | -1.10613 |
| IGHV3-22   | -1.1103  |
| RASGRP2    | -1.11077 |
| VWA3B      | -1.1119  |
| C11orf16   | -1.11208 |
| MEI1       | -1.11213 |
| CUZD1      | -1.11275 |
| RNU7-80P   | -1.11398 |
| SNORD9     | -1.11417 |

|            |          |
|------------|----------|
| SLAMF7     | -1.11438 |
| SCG3       | -1.1157  |
| MTMR7      | -1.11655 |
| AC114760.2 | -1.11955 |
| SYT4       | -1.12014 |
| SNORA74B   | -1.12041 |
| SNTN       | -1.1212  |
| HPX        | -1.12436 |
| IGHV4-34   | -1.12576 |
| OMG        | -1.12754 |
| TRAF3IP3   | -1.12765 |
| AC007991.2 | -1.12832 |
| SH2D1A     | -1.12885 |
| LILRA2     | -1.12898 |
| TRBJ2-7    | -1.12929 |
| CFAP43     | -1.13113 |
| AF178030.1 | -1.13137 |
| DDC        | -1.13381 |
| RNVU1-27   | -1.13496 |
| SCARNA8    | -1.13674 |
| LY9        | -1.13858 |
| CD48       | -1.13962 |
| TRBC1      | -1.14131 |
| AC004386.6 | -1.1416  |
| TFAP2D     | -1.14188 |
| F2         | -1.14266 |
| CAPSL      | -1.14592 |
| DCDC2B     | -1.14879 |
| MUC6       | -1.14941 |
| LINC00426  | -1.15028 |
| AC087286.1 | -1.15098 |
| TRBV20-1   | -1.15211 |
| P2RY10     | -1.15215 |
| IGHV3-38   | -1.15661 |
| IGHD       | -1.15879 |
| TRBV2      | -1.1604  |
| TRBV5-4    | -1.16063 |
| IGKV3D-15  | -1.16147 |
| IGLV7-46   | -1.16226 |
| TRAV12-1   | -1.16276 |
| TRBV6-6    | -1.16465 |
| PYHIN1     | -1.16575 |
| STOML3     | -1.16683 |
| AC004687.1 | -1.1677  |
| IGLV3-12   | -1.16809 |
| SNORA28    | -1.16827 |
| RSPH4A     | -1.16949 |
| IGHV5-78   | -1.17042 |
| RN7SL752P  | -1.17085 |

|              |          |
|--------------|----------|
| CLECL1       | -1.17097 |
| AC015911.3   | -1.17203 |
| ZBP1         | -1.17328 |
| ANKRD44-AS1  | -1.17382 |
| CTLA4        | -1.17388 |
| IGHG2        | -1.17476 |
| TRAV8-3      | -1.17546 |
| IGHD6-19     | -1.17549 |
| RN7SL767P    | -1.17693 |
| IGHA2        | -1.1771  |
| TRBV5-1      | -1.17737 |
| SNORA1B      | -1.17761 |
| SAA4         | -1.18235 |
| BTBD9-AS1    | -1.18281 |
| CXCR2P1      | -1.18442 |
| RERGL        | -1.18593 |
| IGLV3-13     | -1.18776 |
| ANKRD36C     | -1.18841 |
| ADGRG5       | -1.1885  |
| IGHV1-69D    | -1.19142 |
| RNU6-942P    | -1.19142 |
| FAM166B      | -1.19525 |
| ITK          | -1.19548 |
| IGHV3-43     | -1.19628 |
| IGHG3        | -1.19655 |
| IGHV1OR21-1  | -1.19723 |
| TRAJ3        | -1.19758 |
| SLAMF1       | -1.1983  |
| IGHD2-15     | -1.19928 |
| APOH         | -1.20149 |
| IGHV3-60     | -1.20237 |
| MORN5        | -1.20254 |
| AC245128.3   | -1.20321 |
| ZAP70        | -1.20348 |
| IGLV3-21     | -1.20382 |
| IGHV1-67     | -1.20542 |
| IGHV3OR16-15 | -1.20613 |
| CD300LG      | -1.2063  |
| DNAI1        | -1.20685 |
| GZMK         | -1.20734 |
| CFAP73       | -1.20766 |
| RNU6-122P    | -1.20941 |
| RNA5SP111    | -1.21055 |
| C9orf24      | -1.21113 |
| CD40LG       | -1.21195 |
| IGHV3OR16-8  | -1.21699 |
| IGLC6        | -1.21719 |
| AL157871.3   | -1.21893 |
| MIR644A      | -1.22038 |

|              |          |
|--------------|----------|
| TUBA4B       | -1.22282 |
| CCDC154      | -1.22292 |
| C9orf135     | -1.22507 |
| RET          | -1.22732 |
| IGLC2        | -1.22748 |
| CFAP65       | -1.22892 |
| AL139120.1   | -1.22905 |
| CFAP77       | -1.22954 |
| GPR15        | -1.23068 |
| IGLV5-37     | -1.23145 |
| SPRR2A       | -1.23296 |
| SNORA53      | -1.23684 |
| IGHV3-66     | -1.23799 |
| SLAMF6       | -1.23838 |
| CREB3L2-AS1  | -1.23988 |
| RNU6-920P    | -1.24016 |
| PSMD10P1     | -1.24036 |
| RNU6-522P    | -1.24263 |
| RNVU1-31     | -1.24326 |
| CFAP100      | -1.24416 |
| DNAAF1       | -1.24496 |
| IGHV1-18     | -1.2454  |
| C1orf189     | -1.24568 |
| CD27         | -1.24576 |
| GVINP1       | -1.24798 |
| IGHV1-46     | -1.24855 |
| MIR1245A     | -1.24895 |
| IGHV1-58     | -1.24996 |
| AKAP14       | -1.25014 |
| TRAT1        | -1.25023 |
| AC234772.1   | -1.25023 |
| FCMR         | -1.25094 |
| RN7SKP227    | -1.2523  |
| IGKV1OR10-1  | -1.25285 |
| RNU6-2       | -1.25289 |
| AC243960.1   | -1.25316 |
| IGHV3OR15-7  | -1.25383 |
| CFAP52       | -1.25651 |
| IGHA1        | -1.25772 |
| SNORA2C      | -1.25787 |
| IGLV2-28     | -1.25848 |
| ECT2L        | -1.26122 |
| IGHJ2        | -1.26254 |
| VWA3A        | -1.26288 |
| GPR18        | -1.26307 |
| CCR7         | -1.26384 |
| RPL12P20     | -1.26387 |
| IGHV3OR16-12 | -1.26508 |
| IGHV3-6      | -1.26628 |

|             |          |
|-------------|----------|
| AL133304.2  | -1.2667  |
| IGKV2OR22-4 | -1.26706 |
| IGHV7-81    | -1.26732 |
| IGHV3-49    | -1.26814 |
| RNU7-124P   | -1.27269 |
| IGLV1-50    | -1.27306 |
| IGLC3       | -1.27384 |
| AC022022.2  | -1.27487 |
| IGKV2-29    | -1.27558 |
| SPRR1A      | -1.27641 |
| GPR174      | -1.27655 |
| RN7SKP9     | -1.27692 |
| RNU7-70P    | -1.27742 |
| PNOC        | -1.2776  |
| WDR38       | -1.27841 |
| IGKV1D-43   | -1.27913 |
| H2BC9       | -1.28233 |
| HOATZ       | -1.28349 |
| IGKV3D-11   | -1.28381 |
| RNU6-681P   | -1.28531 |
| TRBV4-2     | -1.28593 |
| IGLJ2       | -1.28798 |
| TTC29       | -1.28898 |
| C1orf87     | -1.28901 |
| AC100826.1  | -1.28947 |
| MIAT        | -1.29078 |
| APOBEC4     | -1.29195 |
| IGHV3-62    | -1.29437 |
| LILRP1      | -1.29512 |
| SNORA20     | -1.30147 |
| LRRC71      | -1.30177 |
| IGKV3-7     | -1.30243 |
| CDHR4       | -1.30384 |
| IGHV3-47    | -1.30448 |
| IGLV2-33    | -1.30589 |
| DNAAF6      | -1.3064  |
| TRBV10-3    | -1.307   |
| IGHV3-63    | -1.30747 |
| MZB1        | -1.30855 |
| KIF19       | -1.30914 |
| IGHV1-45    | -1.30921 |
| RNVU1-7     | -1.31285 |
| IGHV3OR16-9 | -1.31369 |
| IGHV1-17    | -1.3146  |
| IGLV4-69    | -1.31759 |
| IGHV1-69    | -1.31802 |
| LRRC18      | -1.3202  |
| LINC01857   | -1.32051 |
| IGHJ3       | -1.32103 |

|             |          |
|-------------|----------|
| AC091925.2  | -1.32108 |
| IGKV1-17    | -1.32109 |
| FCRL2       | -1.32132 |
| OBP2A       | -1.32154 |
| LINC01765   | -1.32203 |
| IGLV2-5     | -1.32269 |
| IGHV7-27    | -1.32477 |
| TRBV4-1     | -1.32511 |
| C20orf85    | -1.32512 |
| SPIB        | -1.32563 |
| C6orf118    | -1.32721 |
| IGLV3-25    | -1.32734 |
| IGHGP       | -1.32835 |
| IGHV3-53    | -1.32913 |
| WDR49       | -1.32972 |
| SNORD56B    | -1.33036 |
| IGLV3-10    | -1.33055 |
| C22orf15    | -1.33208 |
| IGKV1D-17   | -1.33295 |
| TEKT1       | -1.33399 |
| IGKV3D-20   | -1.33458 |
| LTF         | -1.33712 |
| IGKV3-15    | -1.33868 |
| RNU6-998P   | -1.33959 |
| IGHV3-41    | -1.33997 |
| IGHV3-35    | -1.3435  |
| IGHV3-73    | -1.34483 |
| CIBAR2      | -1.34743 |
| AC103591.3  | -1.34983 |
| SNORA14B    | -1.35126 |
| IGKV1-16    | -1.35156 |
| IGHD6-6     | -1.35319 |
| IGLV2-34    | -1.35473 |
| ATP12A      | -1.35492 |
| MIR624      | -1.35539 |
| IGHV1OR15-9 | -1.35638 |
| IGLV1-47    | -1.3575  |
| H3C13       | -1.36004 |
| SRGAP3-AS2  | -1.36016 |
| IGKV1-8     | -1.36089 |
| POU2AF1     | -1.36264 |
| CHRD12      | -1.3627  |
| IGKV1D-13   | -1.36563 |
| IGLV4-3     | -1.36595 |
| NCR3        | -1.36892 |
| IGKV2D-28   | -1.36963 |
| SCARNA7     | -1.37045 |
| IGLV2-11    | -1.37093 |
| AC103563.3  | -1.37107 |



|              |          |
|--------------|----------|
| IGHD3-9      | -1.37485 |
| AC022973.4   | -1.37658 |
| IGKV1-27     | -1.37765 |
| IGHV3-37     | -1.37773 |
| AL049830.4   | -1.38016 |
| SCARNA22     | -1.38063 |
| IGKV2-30     | -1.38365 |
| IGHV4-59     | -1.38491 |
| PI15         | -1.38503 |
| RPS20P15     | -1.38875 |
| RNU11        | -1.38918 |
| DNAH9        | -1.39013 |
| ADAMDEC1     | -1.39212 |
| IGHV3-48     | -1.39315 |
| ITIH2        | -1.39332 |
| C11orf97     | -1.39333 |
| IGLV5-48     | -1.39369 |
| IGKV1OR2-3   | -1.39448 |
| IGHV3-52     | -1.39475 |
| UMODL1       | -1.39479 |
| IGHV3OR16-13 | -1.39815 |
| IGHV3-75     | -1.40013 |
| DTHD1        | -1.40026 |
| RNU5A-8P     | -1.4005  |
| BTLA         | -1.4017  |
| NUGGC        | -1.40294 |
| IGHV3OR16-10 | -1.40459 |
| LINC00582    | -1.40463 |
| DNAI2        | -1.40485 |
| IGHVIII-67-2 | -1.40577 |
| IGLV7-43     | -1.4059  |
| SNORA63C     | -1.40767 |
| IGHV3OR16-17 | -1.41019 |
| AC010359.1   | -1.41022 |
| IGHV4-61     | -1.41117 |
| RNU6-126P    | -1.41268 |
| IGHV3-30     | -1.41491 |
| IGLV6-57     | -1.4163  |
| AC134879.2   | -1.41686 |
| DEFB4A       | -1.41781 |
| H3C12        | -1.4179  |
| LINC00861    | -1.41904 |
| FAM216B      | -1.41946 |
| IGKV3-20     | -1.41959 |
| TRAJ17       | -1.41985 |
| CD22         | -1.42023 |
| RNU5F-1      | -1.42181 |
| SNORD15B     | -1.4223  |
| STAP1        | -1.42365 |

|              |          |
|--------------|----------|
| IGHV3-76     | -1.42475 |
| IGKV1-5      | -1.42507 |
| RNU1-11P     | -1.42609 |
| IGHV4-28     | -1.42962 |
| IGHV2-70     | -1.43035 |
| IGHV4-31     | -1.43095 |
| IGHV5-51     | -1.43127 |
| IGKV1D-8     | -1.43177 |
| IGLL5        | -1.43181 |
| TAC4         | -1.43197 |
| IGKC         | -1.4335  |
| PAH          | -1.43377 |
| IGHV1-12     | -1.43418 |
| IGHG1        | -1.43452 |
| TMEM190      | -1.43544 |
| ZBBX         | -1.43685 |
| AC245517.5   | -1.43748 |
| IGKV1D-33    | -1.44073 |
| TRAJ6        | -1.44099 |
| IGFBP1       | -1.44393 |
| TRAJ18       | -1.44402 |
| RNU6-1045P   | -1.44482 |
| IGKV1-9      | -1.44514 |
| IGLV1-44     | -1.44543 |
| SCARNA21     | -1.4469  |
| IGHV3-72     | -1.44701 |
| IGKV7-3      | -1.45019 |
| IGLV1-40     | -1.45061 |
| AC135068.1   | -1.452   |
| UGT2B4       | -1.45256 |
| IGLV1-51     | -1.45382 |
| IGHV3-64     | -1.45563 |
| IGLV2-8      | -1.45771 |
| LAX1         | -1.4603  |
| IGHV3-33     | -1.46103 |
| IGHV4-55     | -1.46313 |
| MIR8071-1    | -1.46353 |
| IGKV1OR2-108 | -1.46692 |
| RNU4-51P     | -1.46732 |
| AC090571.1   | -1.46876 |
| IGKV2-18     | -1.46994 |
| AL357093.2   | -1.47002 |
| VPREB3       | -1.47086 |
| RNU6-1283P   | -1.47167 |
| IGKV2D-29    | -1.47321 |
| SNORA46      | -1.47381 |
| MIR3140      | -1.47862 |
| TRAJ1        | -1.48111 |
| IGHV7-56     | -1.48318 |

|             |          |
|-------------|----------|
| TCL1A       | -1.48433 |
| TRAJ2       | -1.4846  |
| AC025423.5  | -1.48498 |
| FCRL5       | -1.48904 |
| ERICH3      | -1.48905 |
| MIR5690     | -1.49073 |
| RN7SL648P   | -1.49243 |
| IGHV3-19    | -1.49339 |
| TSPAN19     | -1.49376 |
| IGKV2-28    | -1.49849 |
| IGHV1-3     | -1.49883 |
| LINC02362   | -1.49919 |
| IGKV3-11    | -1.50038 |
| IGHV1OR16-1 | -1.50064 |
| IGKV1D-39   | -1.50141 |
| AC037487.2  | -1.50216 |
| IRF4        | -1.50233 |
| MIR34C      | -1.50412 |
| AC130895.1  | -1.50516 |
| PVALB       | -1.50541 |
| ASCL1       | -1.50709 |
| JCHAIN      | -1.50744 |
| IGHV3-21    | -1.50963 |
| TRAJ5       | -1.51112 |
| AC009032.1  | -1.51121 |
| FGF19       | -1.51204 |
| IGLV2-14    | -1.5175  |
| IGLJ1       | -1.51857 |
| SNORA7B     | -1.51953 |
| SCARNA9     | -1.52379 |
| TRAJ10      | -1.52406 |
| H2AC16      | -1.52424 |
| SNORA40B    | -1.52942 |
| SNRPGP18    | -1.53172 |
| IGHV3-74    | -1.53191 |
| IGKV1OR22-5 | -1.53339 |
| AL033519.1  | -1.53459 |
| IGHV3-15    | -1.53565 |
| ANKRD44-IT1 | -1.53586 |
| CLC         | -1.53817 |
| IGKV1-6     | -1.53878 |
| RNY4        | -1.54039 |
| IGHV1-2     | -1.54049 |
| CD79B       | -1.54203 |
| ASGR2       | -1.54255 |
| DTNB-AS1    | -1.54614 |
| IGKV2OR2-1  | -1.54668 |
| IGHD3-22    | -1.54857 |
| RNU6ATAC    | -1.5494  |

|             |          |
|-------------|----------|
| IGHV3-25    | -1.55808 |
| IGLV3-1     | -1.55813 |
| SNORA63D    | -1.56084 |
| VTRNA1-1    | -1.56198 |
| IGKV1-39    | -1.56325 |
| IGHV3-42    | -1.56582 |
| TNFRSF17    | -1.56603 |
| IGHD4-17    | -1.56678 |
| IGKV2OR22-3 | -1.56749 |
| AGT         | -1.57199 |
| COPDA1      | -1.57459 |
| IGHV3-71    | -1.57552 |
| RN7SL329P   | -1.57767 |
| IGHV3-23    | -1.57881 |
| IGKV6D-21   | -1.58035 |
| IGHV3-7     | -1.58046 |
| IGHV3-20    | -1.58357 |
| SNORA74A    | -1.58481 |
| SMYD3-AS1   | -1.59021 |
| AC142381.1  | -1.59311 |
| RN7SL2      | -1.59476 |
| IGHV4-39    | -1.59774 |
| RNU4ATAC    | -1.59876 |
| IGHJ2P      | -1.60061 |
| IGHV2-26    | -1.60197 |
| SCARNA18    | -1.60201 |
| TMEM14EP    | -1.60302 |
| ANKRD36BP2  | -1.60403 |
| TRAJ39      | -1.60447 |
| IGKJ5       | -1.60488 |
| IGHD4-23    | -1.60547 |
| CYP17A1     | -1.60829 |
| PLA2G2D     | -1.6098  |
| IGLV3-19    | -1.61322 |
| IGHV3-11    | -1.61549 |
| LINC00926   | -1.61778 |
| AL136320.1  | -1.6195  |
| RNU4-1      | -1.62565 |
| IGHV3OR16-6 | -1.63199 |
| IGKV3D-7    | -1.63344 |
| IGHD6-25    | -1.63485 |
| AKR1C4      | -1.63572 |
| IGLV2-18    | -1.63779 |
| LINC01419   | -1.64047 |
| INSM1       | -1.64462 |
| IGHJ1       | -1.64612 |
| IGKV2-24    | -1.65335 |
| SNORD8      | -1.65439 |
| IGHD6-13    | -1.65753 |

|             |          |
|-------------|----------|
| IGKV4-1     | -1.65846 |
| IGLJ3       | -1.65974 |
| TRAJ38      | -1.66141 |
| CXCL13      | -1.66147 |
| IGKV1OR2-11 | -1.66284 |
| MIR8071-2   | -1.66357 |
| IGKV2-26    | -1.66825 |
| CR2         | -1.67309 |
| KRT13       | -1.67997 |
| TNFRSF13C   | -1.68622 |
| RNU2-59P    | -1.69125 |
| IGLV4-60    | -1.69152 |
| IGHV1-24    | -1.69716 |
| SCARNA12    | -1.70318 |
| IGLV3-27    | -1.70409 |
| H2BC14      | -1.7044  |
| IGKV1OR22-1 | -1.70972 |
| RNA5SP202   | -1.71358 |
| RNU4-2      | -1.7164  |
| AL157402.2  | -1.72068 |
| IGHJ3P      | -1.72071 |
| CD79A       | -1.72085 |
| RN7SKP203   | -1.72189 |
| FAM30A      | -1.72345 |
| H4C5        | -1.72791 |
| IGKV1OR2-6  | -1.73093 |
| IGHV4-4     | -1.73604 |
| SNORA80B    | -1.73929 |
| TRAJ12      | -1.74117 |
| IGHV2-5     | -1.74161 |
| SCARNA13    | -1.74961 |
| H3C1        | -1.75036 |
| IGKV1-33    | -1.75523 |
| PCSK1       | -1.75564 |
| H1-4        | -1.75786 |
| IGHV6-1     | -1.75919 |
| CCL19       | -1.75958 |
| AC103563.1  | -1.76172 |
| SNORA74D    | -1.76433 |
| TRAJ13      | -1.76946 |
| IGHD2-2     | -1.772   |
| IGKV1-12    | -1.78118 |
| IGHD4-4     | -1.78165 |
| SCARNA1     | -1.78395 |
| A2ML1       | -1.78901 |
| IGKV1-13    | -1.80106 |
| TRAJ8       | -1.80129 |
| IGHD1-1     | -1.80263 |
| PAX5        | -1.80368 |

|             |          |
|-------------|----------|
| IGLV8-61    | -1.80478 |
| SNORA38B    | -1.80698 |
| FCRL3       | -1.80806 |
| MIR3609     | -1.80971 |
| IGHV1OR16-3 | -1.81311 |
| SCARNA3     | -1.81935 |
| IGLV5-45    | -1.82416 |
| NSG2        | -1.83017 |
| TRAJ37      | -1.83182 |
| H3C11       | -1.83259 |
| SCN3A       | -1.83308 |
| RMRP        | -1.83651 |
| RNU7-84P    | -1.83837 |
| SNORA47     | -1.84022 |
| SNORA37     | -1.84373 |
| TRAJ16      | -1.84443 |
| RNU7-4P     | -1.84952 |
| RNU2-23P    | -1.85143 |
| RN7SL507P   | -1.85622 |
| SCGB1A1     | -1.85633 |
| SCARNA10    | -1.86049 |
| APOA2       | -1.86107 |
| H2AC12      | -1.86391 |
| AC022973.1  | -1.86708 |
| TMEM229A    | -1.87259 |
| FCRLA       | -1.87959 |
| SNORA49     | -1.88447 |
| IGLV10-54   | -1.8863  |
| IGHV3-13    | -1.88743 |
| RNVU1-2A    | -1.8928  |
| TIMM9P1     | -1.91892 |
| CD19        | -1.91949 |
| IGKV6-21    | -1.92875 |
| LBP         | -1.92944 |
| CELF3       | -1.93698 |
| SNORA73B    | -1.94363 |
| PCK1        | -1.94573 |
| SNORA38     | -1.9482  |
| MIR4538     | -1.95328 |
| SNORA14A    | -1.96007 |
| FCER2       | -1.97103 |
| IGHD3-16    | -1.97511 |
| H2AC14      | -1.97675 |
| MIR4539     | -1.98294 |
| IGKV1D-12   | -1.98454 |
| TRAJ21      | -1.99608 |
| SNORA23     | -1.99933 |
| MIR4537     | -2.00197 |
| LINC01781   | -2.009   |

|              |          |
|--------------|----------|
| RNY1         | -2.01912 |
| BLK          | -2.02103 |
| MIR5739      | -2.02834 |
| IGLV3-16     | -2.02852 |
| SNORA71A     | -2.037   |
| SNORA54      | -2.03955 |
| H4C2         | -2.04238 |
| RNU5A-1      | -2.04283 |
| IGHD2-21     | -2.04894 |
| IGLV3-6      | -2.05135 |
| RN7SKP71     | -2.0532  |
| SNORA22      | -2.06114 |
| RN7SKP255    | -2.06966 |
| H2AC4        | -2.07856 |
| IGLV1-36     | -2.08964 |
| AP000763.2   | -2.09197 |
| MIR4480      | -2.10362 |
| IGHV3OR16-11 | -2.10471 |
| RNU5B-1      | -2.11417 |
| IGHM         | -2.11623 |
| IGLVI-70     | -2.13673 |
| IGHD3-3      | -2.14397 |
| IGHV2-70D    | -2.14455 |
| TRAJ14       | -2.1559  |
| IGKV2D-30    | -2.15803 |
| RN7SL546P    | -2.16742 |
| FCRL1        | -2.16827 |
| GP2          | -2.17207 |
| AL391314.1   | -2.17701 |
| AL032819.2   | -2.18405 |
| H4C3         | -2.19563 |
| H2AC21       | -2.19605 |
| FDCSP        | -2.20049 |
| SCARNA6      | -2.20191 |
| SNORA80D     | -2.23568 |
| 7SK          | -2.24163 |
| RNY3         | -2.24738 |
| H4C4         | -2.25232 |
| TF           | -2.25293 |
| SNORA71D     | -2.25533 |
| SCARNA5      | -2.26062 |
| RNU5E-1      | -2.30351 |
| TTR          | -2.30384 |
| H1-3         | -2.30704 |
| MS4A1        | -2.32415 |
| SNORA84      | -2.34665 |
| IGKV1D-16    | -2.3485  |
| CALML3       | -2.34987 |
| SPRR2E       | -2.35576 |

|            |          |
|------------|----------|
| SNORA79B   | -2.37683 |
| SNORA12    | -2.40609 |
| H3C7       | -2.45617 |
| RNU5D-1    | -2.47109 |
| SNORA80A   | -2.4732  |
| OLFM4      | -2.49383 |
| H1-5       | -2.49467 |
| WNT16      | -2.49735 |
| DEFA8P     | -2.53499 |
| CEACAM7    | -2.55247 |
| H4C1       | -2.56295 |
| RNA5-8SN1  | -2.5711  |
| IGHD1-26   | -2.62426 |
| SNORA22C   | -2.65106 |
| SNORD17    | -2.71863 |
| ALB        | -2.72694 |
| SST        | -2.84613 |
| H4C13      | -2.85144 |
| IGKV6D-41  | -2.8825  |
| AL121584.1 | -3.00972 |
| H2BC3      | -3.04524 |
| TAC1       | -3.0936  |
| H2BC10     | -3.1528  |
| SCG2       | -3.16376 |
| AL355075.4 | -3.17743 |
| IGLV9-49   | -3.21637 |
| VTN        | -3.27353 |
| VGLL2      | -3.30562 |
| AC026333.1 | -3.71732 |
| RN7SL434P  | -3.84358 |
| DEFA9P     | -4.05329 |
| GC         | -4.1742  |
| H1-1       | -4.17922 |
| H4C6       | -4.3171  |
| KIR2DL1    | -4.46937 |
| AC093001.1 | -4.71482 |
| DKK4       | -4.95641 |
| CALB1      | -4.9594  |
| AFP        | -5.21308 |
| NPY        | -5.70133 |
| DEFA5      | -8.16463 |

Table S6. Immune cell bubbles of different IRGPI subgroups in multiplatform.

| immune       | cor      | pvalue   |
|--------------|----------|----------|
| B cell_TIMER | -0.55147 | 2.31E-41 |



|                                                |          |          |
|------------------------------------------------|----------|----------|
| T cell CD4+_TIMER                              | -0.37626 | 2.31E-18 |
| T cell CD8+_TIMER                              | -0.19221 | 1.42E-05 |
| Neutrophil_TIMER                               | -0.21329 | 1.38E-06 |
| Myeloid dendritic cell_TIMER                   | -0.26619 | 1.32E-09 |
| B cell naive_CIBERSORT                         | -0.09194 | 0.039289 |
| B cell memory_CIBERSORT                        | -0.37676 | 2.07E-18 |
| B cell plasma_CIBERSORT                        | -0.15689 | 0.000413 |
| T cell CD8+_CIBERSORT                          | -0.18148 | 4.24E-05 |
| T cell CD4+ memory resting_CIBERSORT           | -0.16941 | 0.000135 |
| T cell CD4+ memory activated_CIBERSORT         | -0.11327 | 0.011015 |
| T cell follicular helper_CIBERSORT             | -0.13623 | 0.002199 |
| T cell regulatory (Tregs)_CIBERSORT            | -0.15135 | 0.00066  |
| T cell gamma delta_CIBERSORT                   | -0.11461 | 0.010097 |
| NK cell resting_CIBERSORT                      | 0.125525 | 0.004812 |
| Monocyte_CIBERSORT                             | 0.103994 | 0.019655 |
| Macrophage M0_CIBERSORT                        | 0.09377  | 0.035515 |
| Macrophage M1_CIBERSORT                        | -0.23424 | 1.07E-07 |
| Macrophage M2_CIBERSORT                        | 0.222494 | 4.63E-07 |
| Myeloid dendritic cell activated_CIBERSORT     | 0.175099 | 7.89E-05 |
| Mast cell resting_CIBERSORT                    | 0.123491 | 0.005548 |
| B cell naive_CIBERSORT-ABS                     | -0.19715 | 8.41E-06 |
| B cell memory_CIBERSORT-ABS                    | -0.43266 | 2.31E-24 |
| B cell plasma_CIBERSORT-ABS                    | -0.35859 | 1.04E-16 |
| T cell CD8+_CIBERSORT-ABS                      | -0.39786 | 1.59E-20 |
| T cell CD4+ memory resting_CIBERSORT-ABS       | -0.37755 | 1.73E-18 |
| T cell CD4+ memory activated_CIBERSORT-ABS     | -0.12242 | 0.005977 |
| T cell follicular helper_CIBERSORT-ABS         | -0.39443 | 3.59E-20 |
| T cell regulatory (Tregs)_CIBERSORT-ABS        | -0.26382 | 1.87E-09 |
| T cell gamma delta_CIBERSORT-ABS               | -0.12249 | 0.005947 |
| NK cell resting_CIBERSORT-ABS                  | 0.110028 | 0.013548 |
| NK cell activated_CIBERSORT-ABS                | -0.27148 | 6.01E-10 |
| Macrophage M1_CIBERSORT-ABS                    | -0.37349 | 4.27E-18 |
| Macrophage M2_CIBERSORT-ABS                    | -0.22728 | 2.57E-07 |
| Myeloid dendritic cell activated_CIBERSORT-ABS | 0.113686 | 0.010722 |
| Mast cell resting_CIBERSORT-ABS                | 0.088957 | 0.046142 |
| B cell_QUANTISEQ                               | -0.58235 | 5.29E-47 |
| Macrophage M2_QUANTISEQ                        | -0.207   | 2.84E-06 |
| T cell CD4+ (non-regulatory)_QUANTISEQ         | 0.097661 | 0.028518 |
| T cell CD8+_QUANTISEQ                          | -0.38636 | 2.36E-19 |
| T cell regulatory (Tregs)_QUANTISEQ            | -0.4022  | 5.57E-21 |
| uncharacterized cell_QUANTISEQ                 | 0.248431 | 1.64E-08 |
| T cell_MCPCOUNTER                              | -0.50201 | 1.81E-33 |
| T cell CD8+_MCPCOUNTER                         | -0.37434 | 3.54E-18 |
| cytotoxicity score_MCPCOUNTER                  | -0.27295 | 4.81E-10 |
| NK cell_MCPCOUNTER                             | -0.28027 | 1.57E-10 |
| B cell_MCPCOUNTER                              | -0.71852 | 4.88E-81 |
| Monocyte_MCPCOUNTER                            | -0.15291 | 0.000579 |

|                                        |          |          |
|----------------------------------------|----------|----------|
| Macrophage/Monocyte_MCPCOUNTER         | -0.15291 | 0.000579 |
| Myeloid dendritic cell_MCPCOUNTER      | -0.23215 | 1.40E-07 |
| Myeloid dendritic cell activated_XCELL | -0.42981 | 4.95E-24 |
| B cell_XCELL                           | -0.65135 | 4.73E-62 |
| T cell CD4+ memory_XCELL               | -0.18295 | 3.66E-05 |
| T cell CD4+ naive_XCELL                | -0.39015 | 9.81E-20 |
| T cell CD4+ (non-regulatory)_XCELL     | -0.10644 | 0.016936 |
| T cell CD4+ central memory_XCELL       | -0.10643 | 0.016952 |
| T cell CD4+ effector memory_XCELL      | -0.11748 | 0.008357 |
| T cell CD8+ naive_XCELL                | -0.14511 | 0.0011   |
| T cell CD8+_XCELL                      | -0.46329 | 3.96E-28 |
| T cell CD8+ central memory_XCELL       | -0.48617 | 3.36E-31 |
| T cell CD8+ effector memory_XCELL      | -0.15866 | 0.000354 |
| Class-switched memory B cell_XCELL     | -0.51721 | 9.31E-36 |
| Common lymphoid progenitor_XCELL       | 0.210013 | 2.02E-06 |
| Myeloid dendritic cell_XCELL           | -0.28041 | 1.53E-10 |
| Eosinophil_XCELL                       | -0.08951 | 0.044805 |
| Cancer associated fibroblast_XCELL     | -0.15857 | 0.000357 |
| Hematopoietic stem cell_XCELL          | -0.09028 | 0.042977 |
| Macrophage_XCELL                       | -0.23025 | 1.78E-07 |
| Macrophage M1_XCELL                    | -0.23968 | 5.28E-08 |
| Macrophage M2_XCELL                    | -0.1083  | 0.015094 |
| Mast cell_XCELL                        | -0.18326 | 3.55E-05 |
| B cell memory_XCELL                    | -0.51448 | 2.45E-35 |
| Monocyte_XCELL                         | -0.15199 | 0.000626 |
| B cell naive_XCELL                     | -0.22963 | 1.92E-07 |
| Neutrophil_XCELL                       | 0.14862  | 0.000827 |
| Plasmacytoid dendritic cell_XCELL      | -0.37055 | 8.11E-18 |
| B cell plasma_XCELL                    | -0.50514 | 6.26E-34 |
| immune score_XCELL                     | -0.51066 | 9.34E-35 |
| stroma score_XCELL                     | -0.11654 | 0.008892 |
| microenvironment score_XCELL           | -0.46832 | 8.75E-29 |
| B cell_EPIC                            | -0.7118  | 6.80E-79 |
| T cell CD4+_EPIC                       | -0.19314 | 1.29E-05 |
| Macrophage_EPIC                        | -0.21922 | 6.87E-07 |
| uncharacterized cell_EPIC              | 0.224086 | 3.82E-07 |

Table.S3 GO terms and KEGG pathways enriched in blue modules

| ONTOLOGY | ID         | GeneRatio | BgRatio   | pvalue      | p.adjust    | qvalue      | Count |
|----------|------------|-----------|-----------|-------------|-------------|-------------|-------|
| BP       | GO:0006958 | 87/182    | 141/18862 | 2.4557E-147 | 3.6221E-144 | 3.2208E-144 | 87    |
| BP       | GO:0002455 | 88/182    | 156/18862 | 4.8384E-144 | 3.5683E-141 | 3.1729E-141 | 88    |
| BP       | GO:0006956 | 88/182    | 178/18862 | 6.0405E-137 | 2.9699E-134 | 2.6408E-134 | 88    |
| BP       | GO:0019724 | 92/182    | 226/18862 | 1.4914E-133 | 5.4994E-131 | 4.8901E-131 | 92    |
| BP       | GO:0016064 | 91/182    | 223/18862 | 4.4402E-132 | 1.3098E-129 | 1.1647E-129 | 91    |
| BP       | GO:0002460 | 96/182    | 367/18862 | 6.6263E-118 | 1.629E-115  | 1.4485E-115 | 96    |
| BP       | GO:0006959 | 95/182    | 380/18862 | 2.1038E-114 | 4.4329E-112 | 3.9418E-112 | 95    |
| BP       | GO:0002449 | 93/182    | 360/18862 | 3.3538E-113 | 6.1836E-111 | 5.4985E-111 | 93    |
| BP       | GO:0002377 | 78/182    | 198/18862 | 3.2536E-110 | 5.3323E-108 | 4.7415E-108 | 78    |
| BP       | GO:0006909 | 89/182    | 381/18862 | 2.096E-103  | 3.0915E-101 | 2.749E-101  | 89    |
| BP       | GO:0002440 | 79/182    | 286/18862 | 3.61E-97    | 4.84E-95    | 4.31E-95    | 79    |
| BP       | GO:0002429 | 90/182    | 481/18862 | 3.46E-95    | 3.93E-93    | 3.49E-93    | 90    |
| BP       | GO:0002757 | 90/182    | 481/18862 | 3.46E-95    | 3.93E-93    | 3.49E-93    | 90    |
| BP       | GO:0030449 | 58/182    | 115/18862 | 1.05E-88    | 1.11E-86    | 9.87E-87    | 58    |
| BP       | GO:0002920 | 60/182    | 138/18862 | 9.55E-87    | 9.39E-85    | 8.35E-85    | 60    |
| BP       | GO:0006910 | 53/182    | 98/18862  | 4.82E-83    | 4.44E-81    | 3.95E-81    | 53    |
| BP       | GO:0002433 | 57/182    | 139/18862 | 2.18E-80    | 1.79E-78    | 1.59E-78    | 57    |
| BP       | GO:0038096 | 57/182    | 139/18862 | 2.18E-80    | 1.79E-78    | 1.59E-78    | 57    |
| BP       | GO:0038094 | 57/182    | 140/18862 | 3.65E-80    | 2.84E-78    | 2.52E-78    | 57    |
| BP       | GO:0050853 | 56/182    | 134/18862 | 1.65E-79    | 1.22E-77    | 1.08E-77    | 56    |
| BP       | GO:0002431 | 57/182    | 145/18862 | 4.50E-79    | 3.16E-77    | 2.81E-77    | 57    |
| BP       | GO:0050871 | 56/182    | 150/18862 | 4.43E-76    | 2.97E-74    | 2.64E-74    | 56    |
| BP       | GO:0006911 | 53/182    | 126/18862 | 2.69E-75    | 1.72E-73    | 1.53E-73    | 53    |
| BP       | GO:0099024 | 53/182    | 135/18862 | 2.69E-73    | 1.66E-71    | 1.47E-71    | 53    |
| BP       | GO:0050864 | 58/182    | 193/18862 | 2.23E-72    | 1.32E-70    | 1.17E-70    | 58    |
| BP       | GO:0010324 | 53/182    | 143/18862 | 1.17E-71    | 6.64E-70    | 5.90E-70    | 53    |
| BP       | GO:0038095 | 53/182    | 169/18862 | 4.75E-67    | 2.60E-65    | 2.31E-65    | 53    |
| BP       | GO:0038093 | 57/182    | 239/18862 | 1.43E-64    | 7.52E-63    | 6.69E-63    | 57    |
| BP       | GO:0042113 | 62/182    | 326/18862 | 7.12E-64    | 3.62E-62    | 3.22E-62    | 62    |
| BP       | GO:0051251 | 62/182    | 356/18862 | 2.41E-61    | 1.18E-59    | 1.05E-59    | 62    |
| BP       | GO:0008037 | 54/182    | 232/18862 | 2.12E-60    | 1.01E-58    | 8.96E-59    | 54    |
| BP       | GO:0002697 | 65/182    | 465/18862 | 5.09E-58    | 2.34E-56    | 2.08E-56    | 65    |
| BP       | GO:0002696 | 62/182    | 401/18862 | 5.65E-58    | 2.53E-56    | 2.25E-56    | 62    |
| BP       | GO:0006898 | 58/182    | 328/18862 | 1.41E-57    | 6.12E-56    | 5.44E-56    | 58    |
| BP       | GO:0050867 | 62/182    | 412/18862 | 3.24E-57    | 1.37E-55    | 1.22E-55    | 62    |
| BP       | GO:0050851 | 56/182    | 323/18862 | 5.50E-55    | 2.25E-53    | 2.00E-53    | 56    |
| BP       | GO:0042742 | 57/182    | 344/18862 | 7.80E-55    | 3.11E-53    | 2.77E-53    | 57    |
| BP       | GO:0019730 | 9/182     | 142/18862 | 9.88E-06    | 0.000383434 | 0.000340952 | 9     |
| BP       | GO:0070098 | 7/182     | 88/18862  | 2.28E-05    | 0.000862396 | 0.000766848 | 7     |
| BP       | GO:1990868 | 7/182     | 97/18862  | 4.29E-05    | 0.001543412 | 0.001372411 | 7     |
| BP       | GO:1990869 | 7/182     | 97/18862  | 4.29E-05    | 0.001543412 | 0.001372411 | 7     |
| BP       | GO:0045625 | 3/182     | 10/18862  | 0.000100883 | 0.003542929 | 0.003150394 | 3     |
| BP       | GO:0031295 | 5/182     | 57/18862  | 0.000220804 | 0.007480942 | 0.006652099 | 5     |
| BP       | GO:0050870 | 9/182     | 212/18862 | 0.00022316  | 0.007480942 | 0.006652099 | 9     |
| BP       | GO:0045785 | 13/182    | 425/18862 | 0.000256062 | 0.008334876 | 0.007411422 | 13    |
| BP       | GO:0031294 | 5/182     | 59/18862  | 0.000259935 | 0.008334876 | 0.007411422 | 5     |

|    |            |        |           |             |             |             |    |
|----|------------|--------|-----------|-------------|-------------|-------------|----|
| BP | GO:0019731 | 5/182  | 61/18862  | 0.000304121 | 0.009544208 | 0.008486768 | 5  |
| BP | GO:0022409 | 10/182 | 276/18862 | 0.000359743 | 0.011054613 | 0.009829829 | 10 |
| BP | GO:0042102 | 6/182  | 99/18862  | 0.000396311 | 0.011929759 | 0.010608014 | 6  |
| BP | GO:1903039 | 9/182  | 234/18862 | 0.000460549 | 0.013586195 | 0.012080927 | 9  |
| BP | GO:0030593 | 6/182  | 103/18862 | 0.000489921 | 0.014169275 | 0.012599405 | 6  |
| BP | GO:0045622 | 4/182  | 39/18862  | 0.000529831 | 0.015028865 | 0.013363758 | 4  |
| BP | GO:0045580 | 7/182  | 146/18862 | 0.000545377 | 0.015177948 | 0.013496323 | 7  |
| BP | GO:0045063 | 3/182  | 18/18862  | 0.000648071 | 0.017701942 | 0.015740674 | 3  |
| BP | GO:1903131 | 12/182 | 411/18862 | 0.000666976 | 0.017887082 | 0.015905302 | 12 |
| BP | GO:0070661 | 10/182 | 312/18862 | 0.000928852 | 0.024465311 | 0.021754703 | 10 |
| BP | GO:0061844 | 5/182  | 78/18862  | 0.000945897 | 0.024477158 | 0.021765237 | 5  |
| BP | GO:0001895 | 5/182  | 80/18862  | 0.001060584 | 0.026601175 | 0.023653926 | 5  |
| BP | GO:0030574 | 4/182  | 47/18862  | 0.001082082 | 0.026601175 | 0.023653926 | 4  |
| BP | GO:0097028 | 4/182  | 47/18862  | 0.001082082 | 0.026601175 | 0.023653926 | 4  |
| BP | GO:0034612 | 10/182 | 320/18862 | 0.001124348 | 0.027187113 | 0.024174946 | 10 |
| BP | GO:1990266 | 6/182  | 123/18862 | 0.001242864 | 0.029141782 | 0.02591305  | 6  |
| BP | GO:0042129 | 7/182  | 168/18862 | 0.0012447   | 0.029141782 | 0.02591305  | 7  |
| BP | GO:0070231 | 4/182  | 49/18862  | 0.001266282 | 0.029183848 | 0.025950454 | 4  |
| BP | GO:0071621 | 6/182  | 124/18862 | 0.001295782 | 0.029404283 | 0.026146467 | 6  |
| BP | GO:0050863 | 10/182 | 327/18862 | 0.001321906 | 0.029542585 | 0.026269446 | 10 |
| BP | GO:1903037 | 10/182 | 330/18862 | 0.001414817 | 0.03114709  | 0.027696181 | 10 |
| BP | GO:0043370 | 4/182  | 51/18862  | 0.001471354 | 0.031915407 | 0.028379373 | 4  |
| BP | GO:0033209 | 7/182  | 174/18862 | 0.001523251 | 0.032461303 | 0.028864787 | 7  |
| BP | GO:0003094 | 3/182  | 24/18862  | 0.001540536 | 0.032461303 | 0.028864787 | 3  |
| BP | GO:0045619 | 7/182  | 175/18862 | 0.001574054 | 0.032590731 | 0.028979876 | 7  |
| BP | GO:1902105 | 9/182  | 279/18862 | 0.001591699 | 0.032590731 | 0.028979876 | 9  |
| BP | GO:0030595 | 8/182  | 226/18862 | 0.001612965 | 0.032590731 | 0.028979876 | 8  |
| BP | GO:0046651 | 9/182  | 282/18862 | 0.001712501 | 0.034134311 | 0.030352436 | 9  |
| BP | GO:0097205 | 3/182  | 25/18862  | 0.001738264 | 0.034185856 | 0.030398271 | 3  |
| BP | GO:0032943 | 9/182  | 285/18862 | 0.001840551 | 0.035721221 | 0.031763527 | 9  |
| BP | GO:0050671 | 6/182  | 135/18862 | 0.001998491 | 0.038282785 | 0.034041284 | 6  |
| BP | GO:0032946 | 6/182  | 136/18862 | 0.002074308 | 0.039225687 | 0.034879719 | 6  |
| BP | GO:0002825 | 3/182  | 27/18862  | 0.00217957  | 0.040185821 | 0.035733476 | 3  |
| BP | GO:0033688 | 3/182  | 27/18862  | 0.00217957  | 0.040185821 | 0.035733476 | 3  |
| BP | GO:0071356 | 9/182  | 296/18862 | 0.002377149 | 0.042784794 | 0.038044498 | 9  |
| BP | GO:0042100 | 5/182  | 96/18862  | 0.002383124 | 0.042784794 | 0.038044498 | 5  |
| BP | GO:0070663 | 8/182  | 241/18862 | 0.002407551 | 0.042784794 | 0.038044498 | 8  |
| BP | GO:0030098 | 10/182 | 358/18862 | 0.002565615 | 0.045050981 | 0.040059606 | 10 |
| BP | GO:0042098 | 7/182  | 195/18862 | 0.002896997 | 0.050271416 | 0.044701648 | 7  |
| BP | GO:0034694 | 3/182  | 30/18862  | 0.002961878 | 0.050296625 | 0.044724064 | 3  |
| BP | GO:0060326 | 9/182  | 306/18862 | 0.002966648 | 0.050296625 | 0.044724064 | 9  |
| BP | GO:0007159 | 10/182 | 366/18862 | 0.00300519  | 0.050371089 | 0.044790278 | 10 |
| BP | GO:0071887 | 5/182  | 102/18862 | 0.003100677 | 0.05127399  | 0.045593143 | 5  |
| BP | GO:0070665 | 6/182  | 148/18862 | 0.003163344 | 0.05127399  | 0.045593143 | 6  |
| BP | GO:0097530 | 6/182  | 148/18862 | 0.003163344 | 0.05127399  | 0.045593143 | 6  |
| BP | GO:0007204 | 9/182  | 310/18862 | 0.003232522 | 0.051825768 | 0.046083788 | 9  |
| BP | GO:0050777 | 6/182  | 150/18862 | 0.003379806 | 0.052712379 | 0.046872167 | 6  |
| BP | GO:0042093 | 4/182  | 64/18862  | 0.003395035 | 0.052712379 | 0.046872167 | 4  |
| BP | GO:0048247 | 4/182  | 64/18862  | 0.003395035 | 0.052712379 | 0.046872167 | 4  |

|      |            |         |           |             |             |             |     |
|------|------------|---------|-----------|-------------|-------------|-------------|-----|
| BP   | GO:0022407 | 11/182  | 437/18862 | 0.003534615 | 0.054251836 | 0.048241062 | 11  |
| BP   | GO:0033687 | 3/182   | 32/18862  | 0.003567748 | 0.054251836 | 0.048241062 | 3   |
| CC   | GO:0019814 | 132/182 | 167/19520 | 1.8301E-261 | 1.9399E-259 | 1.9265E-259 | 132 |
| CC   | GO:0042571 | 54/182  | 77/19520  | 7.98E-95    | 4.23E-93    | 4.20E-93    | 54  |
| CC   | GO:0009897 | 66/182  | 402/19520 | 9.72E-65    | 3.44E-63    | 3.41E-63    | 66  |
| CC   | GO:0072562 | 29/182  | 146/19520 | 1.74E-30    | 4.61E-29    | 4.58E-29    | 29  |
| MF   | GO:0003823 | 83/132  | 165/18337 | 7.17E-145   | 1.10E-142   | 9.35E-143   | 83  |
| MF   | GO:0034987 | 53/132  | 79/18337  | 6.92E-99    | 5.30E-97    | 4.52E-97    | 53  |
| MF   | GO:0005125 | 12/132  | 235/18337 | 1.33E-07    | 6.81E-06    | 5.81E-06    | 12  |
| MF   | GO:0008009 | 6/132   | 49/18337  | 1.35E-06    | 5.15E-05    | 4.39E-05    | 6   |
| MF   | GO:0005126 | 11/132  | 270/18337 | 4.13E-06    | 0.000126407 | 0.000107839 | 11  |
| MF   | GO:0045236 | 4/132   | 18/18337  | 7.26E-06    | 0.000185121 | 0.000157929 | 4   |
| MF   | GO:0042379 | 6/132   | 69/18337  | 1.03E-05    | 0.000210702 | 0.000179753 | 6   |
| MF   | GO:0048018 | 14/132  | 486/18337 | 1.10E-05    | 0.000210702 | 0.000179753 | 14  |
| MF   | GO:0030546 | 14/132  | 492/18337 | 1.26E-05    | 0.000214924 | 0.000183354 | 14  |
| MF   | GO:0019955 | 6/132   | 136/18337 | 0.000454249 | 0.006950009 | 0.005929145 | 6   |
| MF   | GO:0001664 | 8/132   | 289/18337 | 0.001179002 | 0.016398841 | 0.013990067 | 8   |
| MF   | GO:0005164 | 3/132   | 31/18337  | 0.001414288 | 0.018032167 | 0.015383479 | 3   |
| MF   | GO:0016175 | 2/132   | 11/18337  | 0.002710796 | 0.031903982 | 0.027217708 | 2   |
| MF   | GO:0048020 | 3/132   | 46/18337  | 0.004415674 | 0.048257012 | 0.041168693 | 3   |
| MF   | GO:0032813 | 3/132   | 49/18337  | 0.005276101 | 0.053816228 | 0.045911333 | 3   |
| MF   | GO:0050664 | 2/132   | 16/18337  | 0.005776835 | 0.055240981 | 0.047126809 | 2   |
| MF   | GO:0005539 | 6/132   | 228/18337 | 0.006181965 | 0.055637682 | 0.047465239 | 6   |
| MF   | GO:0008201 | 5/132   | 164/18337 | 0.006696695 | 0.056921903 | 0.048560826 | 5   |
| KEGG | hsa04060   | 17/37   | 295/8102  | 1.82E-15    | 2.27E-13    | 2.01E-13    | 17  |
| KEGG | hsa04061   | 9/37    | 100/8102  | 4.31E-10    | 2.70E-08    | 2.38E-08    | 9   |
| KEGG | hsa04062   | 8/37    | 192/8102  | 1.84E-06    | 7.67E-05    | 6.78E-05    | 8   |
| KEGG | hsa05340   | 4/37    | 38/8102   | 2.43E-05    | 0.00076     | 0.000672    | 4   |
| KEGG | hsa04672   | 3/37    | 49/8102   | 0.001398    | 0.03495     | 0.030903    | 3   |

Table S4. Correlation between IRGPI subgroups and clinicopathological factors in the TCGA cohort

| Id           | futime | fustat | Age    | Gender | Stage      | T   | M      | N  |
|--------------|--------|--------|--------|--------|------------|-----|--------|----|
| TCGA-J2-8192 | 739    | 0      | 65     | FEMALE | Stage IIA  | T2a | MX     | N1 |
| TCGA-91-8499 | 36     | 0      | 76     | FEMALE | Stage IA   | T1b | MX     | N0 |
| TCGA-53-7624 | 1043   | 1      | 40     | FEMALE | Stage IV   | T2  | M1     | N0 |
| TCGA-55-6986 | 3261   | 0      | 74     | FEMALE | Stage IB   | T2  | M0     | N0 |
| TCGA-38-4632 | 1357   | 1      | 42     | MALE   | Stage IV   | T2  | M1     | N1 |
| TCGA-78-7146 | 173    | 1      | 71     | FEMALE | Stage IIIA | T2  | M0     | N2 |
| TCGA-NJ-A4YG | 2261   | 0      | 65     | MALE   | Stage IB   | T2  | M0     | N0 |
| TCGA-86-8279 | 949    | 0      | 46     | MALE   | Stage IIA  | T2a | M0     | N1 |
| TCGA-50-6591 | 119    | 1      | 63     | FEMALE | Stage IV   | T2  | M1     | N0 |
| TCGA-50-5939 | 460    | 1      | 85     | MALE   | Stage IB   | T2  | M0     | N0 |
| TCGA-62-8402 | 1498   | 1      | 73     | FEMALE | Stage IIIA | T2  | M0     | N2 |
| TCGA-49-4506 | 999    | 1      | 68     | FEMALE | Stage IIB  | T2  | M0     | N1 |
| TCGA-91-6847 | 842    | 0      | 62     | FEMALE | Stage IB   | T2  | MX     | N0 |
| TCGA-97-8547 | 657    | 0      | 78     | FEMALE | Stage IIIA | T2a | MX     | N2 |
| TCGA-97-7546 | 1285   | 0      | 76     | FEMALE | Stage IA   | T1  | MX     | N0 |
| TCGA-73-4659 | 711    | 1      | 66     | MALE   | Stage IIIA | T2  | M0     | N2 |
| TCGA-55-A48Y | 630    | 0      | 69     | MALE   | Stage IIA  | T2b | M0     | N0 |
| TCGA-50-5049 | 3094   | 0      | 70     | MALE   | Stage IA   | T2  | M0     | N0 |
| TCGA-44-3396 | 1130   | 0      | 74     | FEMALE | Stage IIIA | T2  | M0     | N2 |
| TCGA-05-4405 | 610    | 0      | 74     | FEMALE | Stage IB   | T2  | M0     | N0 |
| TCGA-78-8662 | 3361   | 1      | 53     | FEMALE | Stage IB   | T2  | M0     | N0 |
| TCGA-50-8460 | 829    | 0      | 74     | MALE   | Stage IA   | T1a | M0     | N0 |
| TCGA-55-8087 | 462    | 0      | 59     | FEMALE | Stage IB   | T2a | MX     | N0 |
| TCGA-MP-A4TA | 950    | 1      | 75     | FEMALE | Stage IA   | T1  | M0     | N0 |
| TCGA-55-7815 | 773    | 0      | 76     | MALE   | Stage IB   | T2a | MX     | N0 |
| TCGA-55-8096 | 719    | 1      | 67     | FEMALE | Stage IB   | T2a | MX     | N0 |
| TCGA-NJ-A55R | 603    | 0      | 67     | MALE   | Stage IA   | T1b | MX     | N0 |
| TCGA-91-7771 | 492    | 0      | 62     | MALE   | Stage IIB  | T3  | MX     | N0 |
| TCGA-69-7760 | 202    | 0      | 73     | MALE   | Stage IIB  | T3  | M0     | N0 |
| TCGA-44-5644 | 863    | 0      | 51     | FEMALE | Stage IB   | T2a | unknow | N0 |
| TCGA-69-7973 | 230    | 0      | 42     | FEMALE | Stage IB   | T2a | M0     | N0 |
| TCGA-44-6145 | 595    | 0      | 62     | FEMALE | Stage IA   | T1  | M0     | N0 |
| TCGA-64-1676 | 1728   | 0      | 58     | MALE   | Stage IA   | T1a | M0     | N0 |
| TCGA-97-7553 | 1870   | 0      | 58     | FEMALE | Stage IA   | T1  | MX     | N0 |
| TCGA-55-8511 | 552    | 0      | 73     | FEMALE | Stage IB   | T2a | MX     | N0 |
| TCGA-MP-A4TF | 336    | 1      | 58     | FEMALE | Stage IIA  | T2b | M0     | N0 |
| TCGA-55-8204 | 515    | 0      | 87     | FEMALE | Stage IB   | T2a | MX     | N0 |
| TCGA-55-8616 | 48     | 0      | 58     | FEMALE | Stage IB   | T2a | M0     | N0 |
| TCGA-86-8281 | 0      | 0      | 75     | MALE   | Stage IA   | T1  | M0     | NX |
| TCGA-55-7574 | 995    | 1      | 64     | FEMALE | Stage IB   | T2a | M0     | N0 |
| TCGA-L9-A743 | 664    | 0      | 56     | MALE   | Stage IIA  | T2a | M0     | N1 |
| TCGA-73-4670 | 131    | 0      | 69     | FEMALE | Stage IV   | T2  | M1     | N0 |
| TCGA-50-5066 | 1442   | 0      | 72     | MALE   | Stage IB   | T2  | M0     | N0 |
| TCGA-75-5126 |        | 0      | unknow | FEMALE | Stage IIIA | T3  | M0     | N2 |

|              |      |   |        |        |            |     |    |    |
|--------------|------|---|--------|--------|------------|-----|----|----|
| TCGA-64-5779 | 864  | 0 | 61     | MALE   | Stage IIIA | T2  | M0 | N2 |
| TCGA-55-6543 | 435  | 0 | 60     | FEMALE | Stage IA   | T1b | MX | N0 |
| TCGA-55-A48Z | 651  | 0 | 60     | FEMALE | Stage IIIB | T1a | MX | N3 |
| TCGA-86-8278 | 944  | 0 | 63     | FEMALE | Stage IIB  | T2  | M0 | N1 |
| TCGA-L4-A4E5 | 578  | 0 | 48     | FEMALE | Stage I    | T1  | M0 | N0 |
| TCGA-49-4505 | 428  | 1 | 61     | FEMALE | Stage IIB  | T2  | M0 | N1 |
| TCGA-69-7980 | 411  | 0 | 70     | FEMALE | Stage I    | T1b | M0 | N0 |
| TCGA-55-7725 | 442  | 0 | 68     | FEMALE | Stage IA   | T1a | MX | N0 |
| TCGA-78-7162 | 3169 | 1 | 75     | MALE   | Stage IA   | T1  | M0 | N0 |
| TCGA-80-5608 | 2832 | 0 | unknow | FEMALE | Stage IA   | T1  | M0 | N0 |
| TCGA-78-7159 | 1974 | 0 | 60     | FEMALE | Stage IA   | T1  | M0 | NX |
| TCGA-MP-A4TI | 429  | 1 | 72     | MALE   | Stage IIA  | T2a | M0 | N1 |
| TCGA-78-7542 | 321  | 1 | 56     | MALE   | Stage IB   | T2  | M0 | N0 |
| TCGA-91-6836 | 417  | 0 | 52     | FEMALE | Stage IB   | T2  | MX | N0 |
| TCGA-78-7537 | 1622 | 1 | 72     | MALE   | Stage IB   | T2  | M0 | N0 |
| TCGA-97-7941 | 484  | 0 | 72     | FEMALE | Stage IA   | T1b | MX | N0 |
| TCGA-MP-A4TJ | 339  | 1 | 62     | FEMALE | Stage IA   | T1  | M0 | N0 |
| TCGA-78-8660 | 321  | 1 | 69     | MALE   | Stage IIB  | T2  | M0 | N1 |
| TCGA-49-AARQ | 6732 | 0 | 41     | FEMALE | Stage I    | T2  | MX | N0 |
| TCGA-05-4415 | 91   | 1 | 57     | MALE   | Stage IIIB | T4  | M0 | N2 |
| TCGA-86-A4JF | 737  | 1 | 56     | MALE   | Stage IIB  | T3  | M0 | N0 |
| TCGA-86-7701 | 947  | 0 | 66     | MALE   | Stage IV   | T2  | M1 | N0 |
| TCGA-44-3918 | 1036 | 0 | 60     | FEMALE | Stage IA   | T1  | M0 | N0 |
| TCGA-50-6597 | 1268 | 1 | 79     | FEMALE | Stage IB   | T2  | M0 | N0 |
| TCGA-NJ-A4YI | 4    | 1 | 87     | FEMALE | Stage IIIA | T2  | M0 | N2 |
| TCGA-86-8280 | 701  | 0 | 54     | FEMALE | Stage IIA  | T2b | M0 | N0 |
| TCGA-44-2666 | 97   | 1 | 43     | MALE   | Stage IB   | T2  | M0 | N0 |
| TCGA-78-7154 | 593  | 1 | 72     | MALE   | Stage IIIA | T3  | M0 | N2 |
| TCGA-55-A491 | 626  | 0 | 81     | FEMALE | Stage IA   | T1b | MX | N0 |
| TCGA-05-4390 | 1126 | 0 | 58     | FEMALE | Stage IB   | T2  | M0 | N0 |
| TCGA-05-4382 | 607  | 0 | 68     | MALE   | Stage IB   | T2  | M0 | N0 |
| TCGA-55-8206 | 888  | 0 | 56     | MALE   | Stage IA   | T1b | M0 | N0 |
| TCGA-55-7576 | 670  | 0 | 54     | MALE   | Stage IB   | T2a | M0 | N0 |
| TCGA-55-8506 | 11   | 0 | 62     | FEMALE | Stage IIB  | T3  | MX | N0 |
| TCGA-50-5930 | 282  | 1 | 47     | MALE   | Stage IIIA | T2  | M0 | N2 |
| TCGA-05-4403 | 578  | 0 | 76     | MALE   | Stage IB   | T2  | M0 | N0 |
| TCGA-55-7911 | 537  | 0 | 70     | FEMALE | Stage IA   | T1a | MX | N0 |
| TCGA-78-7143 | 4961 | 1 | 62     | FEMALE | Stage IB   | T2  | M0 | N0 |
| TCGA-62-A46P | 594  | 1 | 65     | MALE   | Stage IB   | T2  | M0 | N0 |
| TCGA-95-8494 | 84   | 0 | 67     | MALE   | Stage IIA  | T2a | M0 | N1 |
| TCGA-35-5375 | 264  | 0 | 61     | MALE   | Stage IIIA | T2  | M0 | N2 |
| TCGA-78-7163 | 7248 | 0 | 60     | MALE   | Stage IB   | T2  | M0 | N0 |
| TCGA-05-4417 | 455  | 0 | 51     | FEMALE | Stage IB   | T2  | M0 | N0 |
| TCGA-91-6828 | 323  | 0 | 70     | MALE   | Stage IA   | T1a | M0 | N0 |
| TCGA-44-A47A | 466  | 0 | 78     | FEMALE | Stage IB   | T2a | MX | N0 |
| TCGA-L9-A443 | 193  | 1 | 63     | FEMALE | Stage IA   | T1a | MX | N0 |
| TCGA-86-A4D0 | 116  | 1 | 48     | MALE   | Stage IIA  | T2b | M0 | N0 |
| TCGA-44-A479 | 486  | 0 | 73     | FEMALE | Stage IB   | T2  | MX | N0 |
| TCGA-97-A4LX | 614  | 0 | 81     | MALE   | Stage IB   | T2a | M0 | N0 |

|              |      |   |        |        |            |     |     |    |
|--------------|------|---|--------|--------|------------|-----|-----|----|
| TCGA-49-4486 | 2318 | 1 | 72     | MALE   | Stage IA   | T1  | M0  | N0 |
| TCGA-50-5932 | 1235 | 1 | 75     | MALE   | Stage IIB  | T2  | M0  | N1 |
| TCGA-86-8073 | 740  | 0 | 58     | MALE   | Stage IB   | T2a | M0  | N0 |
| TCGA-NJ-A55O | 13   | 0 | 56     | FEMALE | Stage IIA  | T1b | M0  | N1 |
| TCGA-55-A494 | 481  | 0 | 61     | FEMALE | Stage IB   | T2a | MX  | N0 |
| TCGA-69-7765 | 165  | 0 | 56     | MALE   | unknow     | T4  | MX  | N0 |
| TCGA-86-8672 | 19   | 1 | 59     | MALE   | Stage IIB  | T3  | M0  | N0 |
| TCGA-49-4488 | 869  | 1 | 74     | FEMALE | Stage IA   | T1  | MX  | N0 |
| TCGA-55-7903 | 567  | 0 | 64     | MALE   | Stage IA   | T1b | MX  | N0 |
| TCGA-MP-A4T2 | 1136 | 1 | 71     | MALE   | Stage IA   | T1  | M0  | N0 |
| TCGA-49-4487 | 855  | 1 | 72     | FEMALE | Stage IA   | T1  | M0  | N0 |
| TCGA-99-8033 | 656  | 1 | 74     | FEMALE | Stage IV   | TX  | M1  | NX |
| TCGA-50-5068 | 1499 | 1 | 59     | FEMALE | Stage IIB  | T2  | MX  | N1 |
| TCGA-55-6978 | 176  | 1 | 81     | MALE   | Stage IIA  | T2b | MX  | N0 |
| TCGA-91-A4BC | 44   | 0 | 59     | MALE   | Stage IIA  | T2b | MX  | N0 |
| TCGA-49-4490 | 385  | 1 | 45     | FEMALE | Stage IIIA | T3  | M0  | N2 |
| TCGA-86-7955 | 1072 | 0 | 62     | MALE   | Stage IB   | T2a | M0  | N0 |
| TCGA-05-4430 | 761  | 0 | 59     | FEMALE | Stage IB   | T2  | M0  | N0 |
| TCGA-44-3398 | 1163 | 0 | 77     | FEMALE | Stage IA   | T1b | M0  | N0 |
| TCGA-49-4507 | 268  | 1 | 73     | FEMALE | Stage IIIA | T3  | M0  | N1 |
| TCGA-97-A4M5 | 634  | 0 | 83     | MALE   | Stage IA   | T1b | M0  | N0 |
| TCGA-49-6745 | 522  | 0 | 82     | MALE   | Stage IIIA | T2a | M0  | N2 |
| TCGA-86-8674 | 806  | 0 | 50     | MALE   | Stage IIA  | T2a | M0  | N1 |
| TCGA-05-4384 | 426  | 0 | 66     | MALE   | Stage IIIA | T2  | M0  | N2 |
| TCGA-69-7979 | 408  | 0 | 71     | FEMALE | Stage IB   | T2a | MX  | N0 |
| TCGA-78-7147 | 586  | 1 | 67     | FEMALE | Stage IIB  | T2  | M0  | N1 |
| TCGA-93-7347 | 683  | 0 | 76     | FEMALE | Stage IA   | T1a | MX  | N0 |
| TCGA-49-4514 | 1700 | 0 | 79     | FEMALE | Stage IA   | T1  | M0  | N0 |
| TCGA-49-6742 | 488  | 1 | 70     | MALE   | Stage IIA  | T2a | M0  | N1 |
| TCGA-MN-A4N1 | 827  | 0 | 60     | MALE   | Stage IIA  | T2a | M0  | N1 |
| TCGA-J2-A4AD | 550  | 1 | 61     | FEMALE | Stage IA   | T1a | MX  | N0 |
| TCGA-78-7160 | 697  | 1 | 61     | MALE   | Stage IV   | T4  | M1  | N2 |
| TCGA-05-4397 | 731  | 1 | 65     | MALE   | Stage IIB  | T2  | M0  | N1 |
| TCGA-91-8497 | 434  | 1 | 75     | FEMALE | Stage IA   | T1a | MX  | N0 |
| TCGA-55-7283 | 609  | 0 | 76     | FEMALE | Stage IIIA | T3  | MX  | N2 |
| TCGA-05-4244 | 0    | 0 | 70     | MALE   | Stage IV   | T2  | M1  | N2 |
| TCGA-91-6848 | 224  | 0 | 59     | MALE   | Stage IIIA | T2  | MX  | N2 |
| TCGA-MP-A4TD | 307  | 1 | 71     | MALE   | Stage IIIA | T2  | M0  | N2 |
| TCGA-55-8620 | 375  | 1 | 60     | MALE   | Stage IV   | T1a | M1b | N1 |
| TCGA-97-7547 | 1965 | 0 | 67     | FEMALE | Stage IB   | T2  | MX  | N0 |
| TCGA-44-6777 | 987  | 1 | 85     | FEMALE | Stage IB   | T2  | MX  | NX |
| TCGA-38-4629 | 864  | 1 | 68     | MALE   | Stage IIB  | T3  | M0  | N0 |
| TCGA-55-8097 | 476  | 0 | 60     | FEMALE | Stage IA   | T1a | MX  | N0 |
| TCGA-97-8179 | 435  | 0 | 72     | MALE   | Stage IA   | T1a | M0  | N0 |
| TCGA-78-8648 | 1209 | 1 | 58     | FEMALE | Stage IIB  | T3  | M0  | N0 |
| TCGA-75-5125 | 2027 | 1 | unknow | MALE   | Stage IIB  | T2  | M0  | N1 |
| TCGA-95-7944 | 377  | 0 | 71     | MALE   | Stage IA   | T1a | M0  | N0 |
| TCGA-44-6147 | 845  | 0 | 67     | FEMALE | Stage IA   | T1b | M0  | NX |
| TCGA-55-7727 | 119  | 0 | 70     | MALE   | Stage IIIA | T1a | MX  | N2 |



|              |      |   |        |        |            |     |        |    |
|--------------|------|---|--------|--------|------------|-----|--------|----|
| TCGA-95-7039 | 1272 | 0 | 54     | FEMALE | Stage IIB  | T3  | MX     | N0 |
| TCGA-55-6975 | 118  | 1 | 61     | MALE   | Stage IIB  | T2  | M0     | N1 |
| TCGA-05-4433 | 730  | 0 | 82     | MALE   | Stage IB   | T2  | M0     | N0 |
| TCGA-05-4427 | 791  | 0 | 65     | FEMALE | Stage IIB  | T2  | M0     | N1 |
| TCGA-86-7711 | 1046 | 1 | 70     | MALE   | Stage IIA  | T2a | M0     | N1 |
| TCGA-69-7761 | 186  | 0 | 84     | MALE   | Stage IB   | T2a | MX     | N0 |
| TCGA-44-2661 | 1159 | 0 | 69     | FEMALE | Stage IA   | T1  | M0     | N0 |
| TCGA-55-6981 | 1379 | 1 | 53     | FEMALE | Stage IIIA | T1  | M0     | N2 |
| TCGA-MP-A4TH | 741  | 0 | 70     | FEMALE | Stage IA   | T1a | M0     | N0 |
| TCGA-55-8299 | 469  | 1 | 61     | FEMALE | Stage IA   | T1b | MX     | N0 |
| TCGA-L4-A4E6 | 435  | 0 | 67     | MALE   | Stage IA   | T1  | M0     | N0 |
| TCGA-44-A47F | 337  | 0 | 74     | MALE   | Stage IIB  | T2b | M0     | N1 |
| TCGA-55-7913 | 561  | 1 | 61     | FEMALE | Stage IA   | T1b | MX     | N0 |
| TCGA-38-4628 | 1492 | 1 | 65     | FEMALE | Stage IIB  | T2  | M0     | N1 |
| TCGA-67-6215 | 174  | 0 | 52     | FEMALE | Stage IB   | T2a | M0     | N0 |
| TCGA-NJ-A7XG | 617  | 0 | 49     | MALE   | Stage IIIA | T4  | M0     | N1 |
| TCGA-67-3772 | 573  | 0 | 82     | FEMALE | Stage IB   | T2  | M0     | N0 |
| TCGA-S2-AA1A | 513  | 0 | 68     | FEMALE | Stage IA   | T1b | M0     | N0 |
| TCGA-49-6767 | 677  | 0 | 46     | FEMALE | Stage IIB  | T3  | MX     | N0 |
| TCGA-55-6980 | 2109 | 0 | 56     | MALE   | Stage IA   | T1  | M0     | N0 |
| TCGA-44-6144 | 723  | 0 | 58     | MALE   | Stage IA   | T1a | M0     | N0 |
| TCGA-44-5645 | 852  | 0 | 61     | FEMALE | Stage IA   | T1  | unknow | NX |
| TCGA-MP-A4T7 | 167  | 1 | 75     | FEMALE | Stage IV   | T2  | M1     | N0 |
| TCGA-62-A46V | 2199 | 0 | 78     | FEMALE | Stage IB   | T2  | M0     | N0 |
| TCGA-44-6774 | 658  | 0 | 56     | FEMALE | Stage IIIA | T1  | M0     | N2 |
| TCGA-55-8621 | 515  | 0 | 75     | FEMALE | Stage IA   | T1a | MX     | N0 |
| TCGA-05-4396 | 303  | 1 | 76     | MALE   | Stage IIIB | T4  | M0     | N1 |
| TCGA-55-7573 | 487  | 0 | 72     | FEMALE | Stage IA   | T1b | MX     | N0 |
| TCGA-49-AARR | 4992 | 0 | 68     | MALE   | Stage IA   | T1  | MX     | N0 |
| TCGA-97-A4M3 | 540  | 0 | 69     | FEMALE | Stage IA   | T1b | M0     | N0 |
| TCGA-49-AARO | 3759 | 0 | 39     | FEMALE | Stage IA   | T1a | MX     | N0 |
| TCGA-91-6830 | 60   | 0 | 65     | FEMALE | Stage IIA  | T1  | MX     | N1 |
| TCGA-38-6178 | 448  | 0 | 70     | FEMALE | Stage IIIA | T2b | unknow | N2 |
| TCGA-55-8091 | 600  | 0 | 74     | MALE   | Stage IB   | T2  | MX     | N0 |
| TCGA-55-8507 | 418  | 0 | 53     | MALE   | Stage IA   | T1a | MX     | N0 |
| TCGA-75-7030 |      | 0 | unknow | MALE   | Stage IIB  | T3  | M0     | N0 |
| TCGA-86-A456 | 896  | 0 | 78     | FEMALE | Stage IA   | T1a | M0     | N0 |
| TCGA-55-A492 | 596  | 0 | 70     | FEMALE | Stage IA   | T1a | MX     | N0 |
| TCGA-64-1678 | 1189 | 0 | 70     | FEMALE | unknow     | T2b | M0     | N0 |
| TCGA-62-8399 | 2696 | 0 | 62     | MALE   | Stage IIIA | T2  | M0     | N2 |
| TCGA-55-6985 | 1233 | 0 | 58     | FEMALE | Stage IB   | T2  | MX     | N0 |
| TCGA-44-8120 | 260  | 0 | 58     | MALE   | Stage IB   | T2a | M0     | N0 |
| TCGA-50-5935 | 653  | 1 | 86     | FEMALE | Stage IA   | T1  | M0     | N0 |
| TCGA-50-5044 | 624  | 1 | 72     | FEMALE | Stage IIIB | T4  | M0     | N1 |
| TCGA-55-8085 | 904  | 0 | 64     | MALE   | Stage IA   | T1b | M0     | N0 |
| TCGA-L9-A444 | 307  | 0 | 60     | FEMALE | Stage IA   | T1a | MX     | N0 |
| TCGA-55-8615 | 446  | 0 | 67     | MALE   | Stage IIIA | T3  | MX     | N2 |
| TCGA-97-A4M0 | 652  | 0 | 60     | FEMALE | Stage IB   | T2a | M0     | N0 |
| TCGA-95-7562 | 87   | 1 | 71     | MALE   | Stage IIA  | T2a | M0     | N1 |

|              |      |   |        |        |            |     |    |    |
|--------------|------|---|--------|--------|------------|-----|----|----|
| TCGA-38-4626 | 3674 | 0 | 57     | FEMALE | unknow     | T2b | M0 | N0 |
| TCGA-67-6216 | 141  | 0 | 57     | FEMALE | Stage IA   | T1a | M0 | N0 |
| TCGA-75-6203 |      | 0 | unknow | FEMALE | Stage IIIA | T2  | M0 | N2 |
| TCGA-67-3773 | 427  | 0 | 84     | FEMALE | Stage IB   | T2  | M0 | N0 |
| TCGA-78-7161 | 291  | 1 | 69     | FEMALE | Stage IIB  | T3  | M0 | N0 |
| TCGA-NJ-A4YQ | 1432 | 0 | 69     | FEMALE | Stage IA   | T1b | M0 | N0 |
| TCGA-50-5072 | 250  | 1 | 74     | MALE   | Stage IIIA | T2  | M0 | N2 |
| TCGA-50-5931 | 434  | 1 | 75     | FEMALE | Stage IB   | T2  | M0 | N0 |
| TCGA-49-AARN | 1135 | 1 | 56     | FEMALE | Stage IA   | T1  | MX | N0 |
| TCGA-64-1681 | 1167 | 1 | 61     | FEMALE | Stage IA   | T1  | M0 | N0 |
| TCGA-99-7458 | 747  | 0 | 74     | FEMALE | Stage IIIA | T4  | M0 | N0 |
| TCGA-35-4122 | 225  | 0 | 69     | MALE   | Stage IA   | T1  | M0 | N0 |
| TCGA-55-7728 | 704  | 0 | 64     | FEMALE | Stage IB   | T2a | MX | N0 |
| TCGA-44-7672 | 719  | 0 | 52     | FEMALE | Stage IA   | T1b | M0 | N0 |
| TCGA-44-7662 | 218  | 0 | 61     | MALE   | Stage IB   | T2a | MX | N0 |
| TCGA-86-7714 | 625  | 1 | 61     | FEMALE | Stage IIIA | T1b | M0 | N2 |
| TCGA-97-7552 | 1932 | 0 | 70     | MALE   | Stage IB   | T2  | MX | N0 |
| TCGA-44-5643 | 1013 | 0 | 53     | MALE   | Stage IIIA | T2b | M0 | N2 |
| TCGA-75-7025 | 3305 | 0 | unknow | MALE   | Stage IB   | T2  | M0 | N0 |
| TCGA-78-8655 | 2360 | 0 | 77     | FEMALE | Stage IA   | T1  | M0 | N0 |
| TCGA-97-7937 | 564  | 0 | 65     | MALE   | Stage IB   | T2a | MX | N0 |
| TCGA-64-1679 | 2488 | 0 | 58     | FEMALE | Stage IIIA | T1  | M0 | N2 |
| TCGA-86-A4P8 | 805  | 0 | 59     | FEMALE | Stage IIIA | T1b | MX | N2 |
| TCGA-55-8205 | 599  | 0 | 76     | FEMALE | Stage IIA  | T2b | M0 | N0 |
| TCGA-44-2668 | 761  | 1 | 51     | MALE   | Stage IB   | T2  | M0 | N0 |
| TCGA-NJ-A4YP | 50   | 0 | 52     | MALE   | Stage IB   | T2a | M0 | N0 |
| TCGA-49-4494 | 1081 | 1 | 77     | MALE   | Stage IIIA | T3  | M0 | N2 |
| TCGA-49-AAR9 | 260  | 1 | 61     | MALE   | Stage IIB  | T3  | MX | N0 |
| TCGA-38-4625 | 2973 | 0 | 66     | FEMALE | Stage IB   | T2a | M0 | N0 |
| TCGA-44-7661 | 557  | 1 | 69     | FEMALE | Stage IB   | T2a | M0 | N0 |
| TCGA-55-7726 | 652  | 0 | 72     | FEMALE | Stage IA   | T1b | MX | N0 |
| TCGA-75-6205 |      | 1 | unknow | FEMALE | Stage IB   | T2a | M0 | N0 |
| TCGA-55-6972 | 1632 | 1 | 72     | MALE   | Stage IB   | T2  | M0 | N0 |
| TCGA-86-8359 | 444  | 1 | 52     | MALE   | Stage IIIA | T3  | M0 | N2 |
| TCGA-50-6673 | 22   | 1 | 84     | FEMALE | Stage I    | T1  | M0 | N0 |
| TCGA-44-3917 | 1183 | 0 | 33     | FEMALE | Stage IB   | T2  | M0 | N0 |
| TCGA-95-7567 | 568  | 0 | 61     | MALE   | Stage IIB  | T2b | M0 | N1 |
| TCGA-97-8176 | 468  | 1 | 63     | MALE   | Stage IIIA | T3  | M0 | N1 |
| TCGA-64-1677 | 628  | 1 | 77     | FEMALE | Stage IIIA | T2  | M0 | N2 |
| TCGA-50-5942 | 1847 | 0 | 67     | FEMALE | Stage IA   | T1  | M0 | N0 |
| TCGA-38-4627 | 1147 | 1 | 64     | FEMALE | Stage IIA  | T1b | M0 | N1 |
| TCGA-86-8055 | 124  | 1 | 79     | MALE   | Stage IIA  | T2a | M0 | N1 |
| TCGA-55-A4DF | 440  | 1 | 88     | MALE   | Stage IA   | T1b | MX | N0 |
| TCGA-44-2664 | 1251 | 0 | 66     | FEMALE | Stage IA   | T1  | M0 | N0 |
| TCGA-44-A47B | 287  | 0 | 79     | MALE   | Stage IB   | T2a | M0 | N0 |
| TCGA-62-A46R | 1725 | 1 | 54     | FEMALE | Stage IB   | T2  | M0 | N0 |
| TCGA-71-8520 | 210  | 1 | 60     | FEMALE | Stage IB   | T2  | M0 | N0 |
| TCGA-80-5611 | 2595 | 0 | unknow | MALE   | Stage IB   | T2  | M0 | N0 |
| TCGA-05-4250 | 121  | 1 | 79     | FEMALE | Stage IIIA | T3  | M0 | N1 |

|              |      |   |        |        |            |     |        |        |
|--------------|------|---|--------|--------|------------|-----|--------|--------|
| TCGA-78-7158 | 179  | 1 | 59     | FEMALE | Stage IIIB | T4  | M0     | N2     |
| TCGA-53-7813 | 424  | 0 | 51     | FEMALE | Stage IIIB | T4  | M0     | N0     |
| TCGA-55-6970 | 464  | 1 | 67     | FEMALE | Stage IIIA | T2  | MX     | N2     |
| TCGA-73-A9RS | 340  | 1 | 41     | MALE   | Stage IIB  | T3  | M0     | N0     |
| TCGA-69-7764 | 414  | 0 | 75     | MALE   | Stage IA   | T1b | M0     | N0     |
| TCGA-55-8094 | 541  | 0 | 51     | MALE   | Stage IV   | T2b | M1b    | N0     |
| TCGA-95-A4VN | 553  | 0 | 62     | FEMALE | Stage IIA  | T2a | M0     | N1     |
| TCGA-69-8254 | 409  | 0 | 85     | MALE   | unknow     | T2b | unknow | unknow |
| TCGA-49-AAR3 | 1893 | 0 | 69     | MALE   | Stage IIB  | T2  | MX     | N1     |
| TCGA-49-4510 | 896  | 1 | 51     | FEMALE | Stage IIB  | T2  | M0     | N1     |
| TCGA-55-7281 | 872  | 0 | 70     | FEMALE | Stage IA   | T1b | M0     | N0     |
| TCGA-69-7763 | 690  | 0 | 69     | MALE   | Stage IA   | T1b | M0     | N0     |
| TCGA-78-7148 | 626  | 1 | 71     | MALE   | Stage IIB  | T2  | M0     | N1     |
| TCGA-97-A4M7 | 629  | 0 | 74     | MALE   | Stage IA   | T1b | M0     | N0     |
| TCGA-86-8668 | 423  | 0 | 61     | FEMALE | Stage IA   | T1b | M0     | N0     |
| TCGA-49-AAQV | 677  | 1 | 63     | FEMALE | Stage II   | T1  | MX     | N1     |
| TCGA-71-6725 | 256  | 0 | 48     | FEMALE | Stage IB   | T2  | M0     | N0     |
| TCGA-55-7570 | 824  | 0 | 60     | MALE   | Stage IA   | T1a | MX     | N0     |
| TCGA-05-4402 | 244  | 1 | 57     | FEMALE | Stage IV   | T2  | M1     | NX     |
| TCGA-67-4679 | 448  | 0 | 69     | MALE   | unknow     | T3  | M0     | N0     |
| TCGA-05-4422 | 365  | 0 | 68     | MALE   | Stage IB   | T2  | M0     | N0     |
| TCGA-55-7227 | 952  | 1 | 77     | MALE   | Stage IIIA | T3  | MX     | N1     |
| TCGA-55-1594 | 1178 | 0 | 68     | MALE   | Stage IIIA | T2  | M0     | N2     |
| TCGA-49-AAR4 | 879  | 1 | 51     | MALE   | Stage IIIA | T2  | MX     | N2     |
| TCGA-62-A46Y | 414  | 1 | 70     | FEMALE | Stage IIIA | T2  | M0     | N2     |
| TCGA-86-8054 | 1148 | 0 | 61     | MALE   | Stage IIB  | T2b | M0     | N1     |
| TCGA-62-A46S | 1653 | 1 | 73     | MALE   | Stage IB   | T2  | M0     | N0     |
| TCGA-97-8177 | 499  | 0 | 59     | FEMALE | Stage IB   | T2a | M0     | N0     |
| TCGA-05-5425 | 882  | 0 | 68     | MALE   | Stage IIB  | T2b | M0     | N1     |
| TCGA-49-6744 | 1683 | 0 | 64     | FEMALE | Stage IIA  | T2a | MX     | N1     |
| TCGA-44-6778 | 1864 | 0 | 59     | MALE   | Stage IA   | T1  | MX     | N0     |
| TCGA-75-6206 | 2590 | 0 | unknow | MALE   | Stage IB   | T2  | M0     | N0     |
| TCGA-80-5607 |      | 0 | unknow | FEMALE | Stage IIB  | T2  | M0     | N1     |
| TCGA-NJ-A4YF | 2161 | 0 | 50     | FEMALE | Stage IA   | T1  | M0     | N0     |
| TCGA-78-7220 | 807  | 1 | 53     | FEMALE | Stage IIIA | T2  | M0     | N2     |
| TCGA-50-6595 | 189  | 1 | 74     | FEMALE | Stage IIIA | T2  | M0     | N2     |
| TCGA-78-7167 | 2681 | 1 | 77     | MALE   | Stage IV   | T2  | M1     | N0     |
| TCGA-95-7948 | 476  | 0 | 42     | FEMALE | Stage IB   | T2a | M0     | N0     |
| TCGA-75-6207 |      | 1 | unknow | MALE   | Stage IIIA | T2  | M0     | N2     |
| TCGA-05-4389 | 1369 | 0 | 70     | MALE   | Stage IA   | T1  | M0     | N0     |
| TCGA-05-5429 | 275  | 1 | 60     | MALE   | Stage IIIA | T3  | M0     | N2     |
| TCGA-55-7907 | 343  | 1 | 77     | MALE   | Stage IIA  | T2a | MX     | N1     |
| TCGA-67-3776 | 61   | 0 | 57     | FEMALE | Stage IIB  | T2  | M0     | N1     |
| TCGA-73-4677 | 38   | 1 | 74     | MALE   | unknow     | T2a | M0     | N0     |
| TCGA-97-8172 | 545  | 0 | 75     | FEMALE | Stage IB   | T2a | M0     | N0     |
| TCGA-75-5147 | 1333 | 0 | unknow | FEMALE | Stage IB   | T2  | M0     | N0     |
| TCGA-50-5045 | 2174 | 1 | 57     | FEMALE | unknow     | T2  | M0     | N1     |
| TCGA-44-A4SU | 409  | 1 | 67     | FEMALE | Stage IA   | T1a | MX     | N0     |
| TCGA-55-8301 | 534  | 0 | 58     | MALE   | Stage IB   | T2a | MX     | N0     |

|              |      |   |        |        |            |     |     |    |
|--------------|------|---|--------|--------|------------|-----|-----|----|
| TCGA-55-1596 | 2065 | 0 | 55     | MALE   | Stage IIB  | T2  | M0  | N1 |
| TCGA-55-A4DG | 608  | 0 | 71     | MALE   | Stage IA   | T1b | MX  | N0 |
| TCGA-49-AARE | 1229 | 1 | 51     | FEMALE | Stage IA   | T1  | MX  | N0 |
| TCGA-50-6592 | 777  | 1 | 71     | FEMALE | Stage IB   | T2  | M0  | N0 |
| TCGA-J2-A4AG | 988  | 0 | 66     | FEMALE | Stage IA   | T1b | MX  | N0 |
| TCGA-67-3771 | 610  | 0 | 77     | FEMALE | Stage IA   | T1  | M0  | N0 |
| TCGA-73-4662 | 2515 | 0 | 65     | FEMALE | Stage IA   | T1  | M0  | N0 |
| TCGA-05-5420 | 457  | 0 | 67     | MALE   | Stage IIIA | T2  | M0  | N2 |
| TCGA-86-8056 | 139  | 0 | 63     | FEMALE | Stage IIIA | T4  | M0  | N0 |
| TCGA-J2-A4AE | 1079 | 0 | 77     | FEMALE | Stage IA   | T1a | MX  | N0 |
| TCGA-44-7669 | 574  | 1 | 59     | MALE   | Stage IIA  | T1b | MX  | N1 |
| TCGA-44-8119 | 285  | 0 | 73     | MALE   | Stage IIB  | T3  | M0  | N0 |
| TCGA-50-5941 | 1474 | 0 | 55     | FEMALE | Stage IIIA | T2a | M0  | N2 |
| TCGA-64-5781 | 1559 | 0 | 55     | FEMALE | Stage IB   | T2  | M0  | N0 |
| TCGA-73-4666 | 800  | 0 | 52     | FEMALE | Stage IV   | T1  | M1  | N0 |
| TCGA-L9-A8F4 | 476  | 0 | 64     | FEMALE | Stage IB   | T2a | MX  | N0 |
| TCGA-69-8253 | 426  | 0 | 59     | FEMALE | Stage IIA  | T1a | MX  | N1 |
| TCGA-97-8552 | 626  | 0 | 55     | FEMALE | Stage I    | T1a | MX  | N0 |
| TCGA-44-6776 | 2616 | 0 | 60     | FEMALE | Stage IA   | T1  | MX  | N0 |
| TCGA-L9-A5IP | 58   | 1 | 40     | FEMALE | Stage IV   | T3  | M1b | N2 |
| TCGA-44-6148 | 704  | 0 | 60     | MALE   | Stage IA   | T1b | M0  | N0 |
| TCGA-38-4630 | 1073 | 1 | 75     | FEMALE | Stage IB   | T2  | M0  | N0 |
| TCGA-95-7947 | 477  | 0 | 67     | MALE   | Stage IA   | T1a | M0  | N0 |
| TCGA-4B-A93V | 300  | 1 | 52     | FEMALE | Stage IA   | T1b | M0  | N0 |
| TCGA-86-8076 | 993  | 0 | 42     | MALE   | Stage IA   | T1  | M0  | N0 |
| TCGA-05-4410 | 0    | 0 | 62     | MALE   | Stage IB   | T2  | M0  | N0 |
| TCGA-62-A472 | 910  | 0 | 70     | MALE   | Stage IIB  | T3  | M0  | N0 |
| TCGA-55-6968 | 1293 | 1 | 61     | MALE   | Stage IV   | T1  | M1  | N0 |
| TCGA-55-8514 | 520  | 0 | 70     | FEMALE | Stage IB   | T2a | MX  | N0 |
| TCGA-75-7031 |      | 0 | unknow | FEMALE | Stage IB   | T2  | M0  | N0 |
| TCGA-62-8397 | 1289 | 0 | 70     | FEMALE | Stage IIB  | T3  | M0  | N0 |
| TCGA-86-7953 | 997  | 0 | 69     | FEMALE | Stage IA   | T1b | M0  | N0 |
| TCGA-75-5146 | 2368 | 0 | unknow | MALE   | Stage IB   | T2  | M0  | N0 |
| TCGA-44-A47G | 351  | 0 | 73     | FEMALE | Stage IA   | T1  | M0  | N0 |
| TCGA-86-8671 | 839  | 0 | 72     | FEMALE | Stage IIB  | T2b | M0  | N1 |
| TCGA-86-8358 | 653  | 0 | 44     | MALE   | Stage IB   | T2a | M0  | N0 |
| TCGA-93-A4JN | 718  | 0 | 71     | MALE   | Stage IV   | T2a | M1a | N0 |
| TCGA-05-4432 | 761  | 0 | 66     | MALE   | Stage IIB  | T2  | M0  | N1 |
| TCGA-86-8669 | 938  | 0 | 64     | MALE   | Stage IA   | T1b | M0  | N0 |
| TCGA-95-A4VK | 651  | 0 | 74     | FEMALE | Stage IIIA | T2b | M0  | N2 |
| TCGA-44-7670 | 882  | 0 | 47     | FEMALE | Stage IIA  | T1b | M0  | N1 |
| TCGA-73-7499 | 1531 | 1 | 81     | FEMALE | Stage IB   | T2a | M0  | N0 |
| TCGA-62-A46U | 2067 | 0 | 71     | FEMALE | Stage IIB  | T2  | M0  | N1 |
| TCGA-55-8508 | 617  | 0 | 60     | FEMALE | Stage IIA  | T2a | MX  | N1 |
| TCGA-44-2657 | 1351 | 0 | 74     | FEMALE | Stage IB   | T2  | M0  | NX |
| TCGA-97-8171 | 568  | 0 | 81     | MALE   | Stage IV   | T2a | M1a | N2 |
| TCGA-50-5944 | 1750 | 0 | 69     | FEMALE | Stage IA   | T1  | M0  | N0 |
| TCGA-78-7633 | 1528 | 1 | 67     | MALE   | Stage IB   | T2  | M0  | N0 |
| TCGA-64-5775 | 62   | 1 | 71     | MALE   | Stage IIIA | T4  | M0  | N0 |

|              |      |   |        |        |            |     |     |    |
|--------------|------|---|--------|--------|------------|-----|-----|----|
| TCGA-J2-8194 | 724  | 0 | 69     | FEMALE | Stage IIB  | T3  | MX  | N0 |
| TCGA-78-7539 | 791  | 0 | 75     | FEMALE | Stage IIA  | T2b | M0  | N0 |
| TCGA-91-6829 | 1258 | 1 | 78     | MALE   | Stage IB   | T2  | MX  | N0 |
| TCGA-99-8028 | 1118 | 0 | 50     | FEMALE | Stage IA   | T1a | M0  | N0 |
| TCGA-78-7153 | 3635 | 0 | 65     | FEMALE | Stage IB   | T2  | M0  | N0 |
| TCGA-L9-A50W | 442  | 1 | 75     | MALE   | Stage IIA  | T1b | MX  | N1 |
| TCGA-50-6594 | 370  | 1 | 79     | FEMALE | Stage IIIA | T3  | M0  | N2 |
| TCGA-50-5936 | 257  | 1 | 58     | MALE   | Stage IIIA | T2  | M0  | N2 |
| TCGA-05-5428 | 670  | 0 | 57     | MALE   | Stage IIA  | T1b | M0  | N1 |
| TCGA-55-5899 | 930  | 0 | 58     | MALE   | unknow     | T1a | M0  | N1 |
| TCGA-44-7659 | 691  | 0 | 70     | MALE   | Stage IA   | T1b | MX  | N0 |
| TCGA-55-7816 | 468  | 1 | 49     | FEMALE | Stage IV   | TX  | MX  | NX |
| TCGA-05-4425 | 669  | 0 | 70     | FEMALE | Stage IV   | T2  | M1  | N0 |
| TCGA-44-2665 | 1301 | 0 | 55     | FEMALE | Stage IIB  | T2  | M0  | N1 |
| TCGA-05-4424 | 913  | 0 | 70     | MALE   | Stage IIB  | T3  | M0  | N0 |
| TCGA-78-7156 | 976  | 1 | 62     | MALE   | Stage IV   | T4  | M1  | N1 |
| TCGA-49-4512 | 905  | 1 | 69     | FEMALE | Stage IIIA | T2  | MX  | N2 |
| TCGA-78-7536 | 244  | 1 | 69     | MALE   | Stage IIIA | T2  | M0  | N2 |
| TCGA-97-8175 | 551  | 0 | 55     | FEMALE | Stage IB   | T2a | M0  | N0 |
| TCGA-49-4501 | 1421 | 1 | 67     | FEMALE | Stage IB   | T2  | M0  | N0 |
| TCGA-53-7626 | 929  | 1 | 76     | FEMALE | Stage IIA  | T1  | M0  | N1 |
| TCGA-55-6984 | 760  | 1 | 71     | FEMALE | Stage IIB  | T2  | M0  | N1 |
| TCGA-44-2659 | 1367 | 0 | 65     | FEMALE | Stage IIB  | T1  | M0  | N1 |
| TCGA-MP-A4SW | 1778 | 1 | 53     | MALE   | Stage IIB  | T2  | M0  | N1 |
| TCGA-55-A48X | 689  | 0 | 63     | FEMALE | Stage IIA  | T1b | M0  | N1 |
| TCGA-55-1592 | 701  | 1 | 65     | MALE   | Stage IA   | T2  | M0  | N0 |
| TCGA-86-8673 | 862  | 0 | 61     | MALE   | Stage IB   | T2  | M0  | N0 |
| TCGA-35-4123 | 182  | 0 | 38     | MALE   | Stage IA   | T1  | M0  | N0 |
| TCGA-78-8640 | 7062 | 0 | 59     | MALE   | Stage IIA  | T1  | M0  | N1 |
| TCGA-75-7027 | 3059 | 0 | unknow | MALE   | Stage IB   | T2  | M0  | N0 |
| TCGA-99-8032 | 44   | 0 | 61     | MALE   | Stage IA   | T1a | M0  | N0 |
| TCGA-49-6761 | 354  | 0 | 68     | FEMALE | Stage IIIA | T1  | MX  | N2 |
| TCGA-MP-A4SY | 1501 | 1 | 61     | MALE   | Stage IIB  | T2  | M0  | N1 |
| TCGA-55-A490 | 99   | 1 | 78     | MALE   | Stage IIA  | T2b | MX  | N0 |
| TCGA-93-7348 | 531  | 0 | 75     | FEMALE | Stage IA   | T1a | MX  | N0 |
| TCGA-49-AAR0 | 4765 | 0 | 57     | MALE   | Stage IA   | T1  | MX  | N0 |
| TCGA-93-A4JP | 578  | 0 | 64     | MALE   | Stage IV   | TX  | M1b | NX |
| TCGA-55-6979 | 237  | 1 | 59     | FEMALE | Stage IIB  | T2  | M0  | N1 |
| TCGA-73-7498 | 1189 | 0 | 58     | FEMALE | Stage IA   | T1b | M0  | N0 |
| TCGA-MP-A4T8 | 161  | 1 | 68     | MALE   | Stage IIIA | T2  | M0  | N2 |
| TCGA-50-6590 | 1288 | 1 | 72     | FEMALE | Stage IB   | T2  | M0  | N0 |
| TCGA-64-5815 | 866  | 0 | 74     | MALE   | Stage IIB  | T2  | M0  | N1 |
| TCGA-78-7540 | 1197 | 1 | 66     | FEMALE | Stage IB   | T2  | M0  | N0 |
| TCGA-55-8510 | 539  | 0 | 55     | FEMALE | Stage IB   | T2a | MX  | N0 |
| TCGA-44-7671 | 889  | 0 | 64     | MALE   | Stage IB   | T2a | M0  | N0 |
| TCGA-91-8496 | 505  | 0 | 63     | FEMALE | Stage IB   | T2a | MX  | NX |
| TCGA-55-8089 | 702  | 1 | 56     | MALE   | Stage IA   | T1a | M0  | N0 |
| TCGA-99-AA5R | 658  | 0 | 70     | FEMALE | Stage IA   | T1a | M0  | N0 |
| TCGA-55-8505 | 440  | 0 | 62     | MALE   | Stage IIIA | T1a | MX  | N2 |

|              |      |   |    |        |            |     |     |    |
|--------------|------|---|----|--------|------------|-----|-----|----|
| TCGA-05-5423 | 151  | 0 | 65 | MALE   | Stage IIB  | T2  | M0  | N1 |
| TCGA-55-8614 | 536  | 0 | 76 | MALE   | Stage IB   | T2a | MX  | N0 |
| TCGA-50-5946 | 1617 | 0 | 62 | MALE   | Stage IA   | T1  | MX  | N0 |
| TCGA-05-4245 | 730  | 0 | 81 | MALE   | Stage IIIA | T2  | M0  | N2 |
| TCGA-91-A4BD | 603  | 0 | 78 | MALE   | Stage IIA  | T1b | MX  | N1 |
| TCGA-55-8512 | 607  | 1 | 41 | MALE   | Stage IV   | T1a | M1b | N1 |
| TCGA-NJ-A55A | 15   | 0 | 76 | FEMALE | Stage IB   | T2  | M0  | N0 |
| TCGA-05-4434 | 457  | 1 | 67 | FEMALE | Stage IV   | T4  | M1  | N1 |
| TCGA-97-A4M6 | 568  | 0 | 45 | FEMALE | Stage IA   | T1a | M0  | N0 |
| TCGA-86-7954 | 605  | 0 | 68 | FEMALE | Stage IB   | T2  | M0  | N0 |
| TCGA-78-7150 | 666  | 1 | 59 | MALE   | Stage IIB  | T2  | M0  | N1 |
| TCGA-62-A470 | 1194 | 1 | 84 | MALE   | Stage IB   | T2  | M0  | N0 |
| TCGA-69-8255 | 129  | 0 | 71 | MALE   | Stage IA   | T1a | M0  | N0 |
| TCGA-55-8208 | 674  | 0 | 73 | FEMALE | Stage IA   | T1b | M0  | N0 |
| TCGA-50-5051 | 478  | 1 | 42 | FEMALE | Stage IIIA | T2  | M0  | N2 |
| TCGA-55-7910 | 1040 | 0 | 50 | FEMALE | Stage IIA  | T2b | M0  | N0 |
| TCGA-38-7271 | 800  | 1 | 72 | FEMALE | Stage IA   | T1  | M0  | N0 |
| TCGA-86-8585 | 353  | 0 | 57 | MALE   | Stage IB   | T2a | M0  | N0 |
| TCGA-86-8075 | 694  | 1 | 66 | FEMALE | Stage IB   | T2  | M0  | N0 |
| TCGA-73-4676 | 281  | 1 | 45 | MALE   | Stage IIA  | T2a | M0  | N1 |
| TCGA-50-5933 | 2393 | 1 | 72 | MALE   | Stage IIIB | T4  | M0  | N2 |
| TCGA-73-4675 | 922  | 1 | 59 | MALE   | Stage IIIA | T3  | M0  | N1 |
| TCGA-55-6987 | 2137 | 0 | 77 | MALE   | Stage IA   | T1  | M0  | N0 |
| TCGA-50-5055 | 1830 | 1 | 79 | FEMALE | Stage IIA  | T1  | M0  | N1 |
| TCGA-MN-A4N5 | 84   | 0 | 63 | MALE   | Stage IA   | T1a | M0  | N0 |
| TCGA-38-A44F | 133  | 0 | 80 | MALE   | Stage IB   | T2a | M0  | N0 |
| TCGA-55-6971 | 1400 | 0 | 59 | FEMALE | Stage IB   | T2  | MX  | N0 |
| TCGA-69-7974 | 184  | 0 | 54 | FEMALE | Stage IIIA | T2a | MX  | N2 |
| TCGA-44-6779 | 500  | 1 | 50 | FEMALE | Stage IIB  | T2  | MX  | N1 |
| TCGA-MP-A4TC | 74   | 1 | 77 | MALE   | Stage IIIA | T1  | M0  | N2 |
| TCGA-55-8302 | 478  | 0 | 54 | MALE   | Stage IB   | T2  | MX  | N0 |
| TCGA-67-3774 | 385  | 0 | 73 | FEMALE | Stage IB   | T2  | M0  | N0 |
| TCGA-55-A493 | 28   | 0 | 54 | FEMALE | Stage IB   | T2a | M0  | N0 |
| TCGA-50-7109 | 308  | 1 | 60 | MALE   | Stage IA   | T1  | M0  | N0 |
| TCGA-55-6982 | 995  | 1 | 79 | FEMALE | Stage IIB  | T2  | M0  | N1 |
| TCGA-86-8074 | 24   | 0 | 62 | FEMALE | Stage IIA  | T1b | M0  | N1 |
| TCGA-69-A59K | 591  | 0 | 60 | FEMALE | Stage IIB  | T3  | M0  | N0 |
| TCGA-55-8090 | 598  | 1 | 80 | MALE   | Stage IA   | T1a | M0  | N0 |
| TCGA-97-A4M2 | 624  | 0 | 66 | MALE   | Stage IA   | T1a | M0  | N0 |
| TCGA-MP-A4T9 | 1265 | 1 | 54 | FEMALE | Stage IIIA | T2  | MX  | N2 |
| TCGA-MP-A4TK | 582  | 1 | 56 | FEMALE | Stage IIB  | T2  | MX  | N1 |
| TCGA-91-6849 | 35   | 0 | 75 | FEMALE | Stage IIIA | T2  | MX  | N2 |
| TCGA-50-6593 | 336  | 1 | 49 | FEMALE | Stage IIIA | T1  | M0  | N2 |
| TCGA-95-7043 | 503  | 1 | 63 | FEMALE | Stage IA   | T1a | MX  | N0 |
| TCGA-55-7724 | 705  | 0 | 76 | FEMALE | Stage IB   | T2a | MX  | N0 |
| TCGA-53-A4EZ | 1071 | 0 | 63 | MALE   | Stage IIA  | T2a | MX  | N1 |
| TCGA-44-7667 | 1097 | 0 | 49 | FEMALE | Stage IIB  | T3  | MX  | N0 |
| TCGA-44-8117 | 385  | 0 | 54 | FEMALE | Stage IB   | T2a | M0  | N0 |
| TCGA-55-6983 | 2823 | 0 | 81 | MALE   | Stage IIB  | T2  | M0  | N1 |

|              |      |   |        |        |            |     |    |    |
|--------------|------|---|--------|--------|------------|-----|----|----|
| TCGA-44-6146 | 728  | 0 | 64     | MALE   | Stage IIB  | T3  | M0 | N0 |
| TCGA-55-8513 | 791  | 0 | 77     | FEMALE | Stage IIB  | T3  | MX | N0 |
| TCGA-MP-A5C7 | 2248 | 0 | 76     | FEMALE | Stage IB   | T2  | M0 | N0 |
| TCGA-75-6214 | 1115 | 1 | unknow | FEMALE | Stage IIIA | T2  | M0 | N2 |
| TCGA-86-7713 | 1157 | 0 | 70     | MALE   | Stage IIA  | T2b | M0 | N0 |
| TCGA-75-6212 | 1516 | 1 | unknow | FEMALE | Stage IIB  | T2  | M0 | N1 |
| TCGA-62-8394 | 139  | 1 | 65     | FEMALE | Stage IIIB | T4  | M0 | N2 |
| TCGA-64-5778 | 1305 | 0 | 60     | MALE   | Stage IB   | T2  | M0 | N0 |
| TCGA-97-8174 | 164  | 1 | 67     | MALE   | Stage IIA  | T2b | M0 | N0 |
| TCGA-50-8459 | 1119 | 0 | 68     | MALE   | Stage IIB  | T3  | M0 | N0 |
| TCGA-50-8457 | 1125 | 0 | 63     | FEMALE | Stage IA   | T1a | M0 | N0 |
| TCGA-97-A4M1 | 601  | 0 | 52     | FEMALE | Stage IA   | T1a | M0 | N0 |
| TCGA-78-7166 | 258  | 1 | 84     | MALE   | Stage IIB  | T2  | M0 | N1 |
| TCGA-83-5908 | 824  | 0 | 59     | FEMALE | Stage IA   | T1  | M0 | N0 |
| TCGA-05-4426 | 791  | 0 | 71     | MALE   | Stage IB   | T2  | M0 | N0 |
| TCGA-55-7995 | 889  | 0 | 73     | FEMALE | Stage IA   | T1b | M0 | N0 |
| TCGA-93-8067 | 186  | 0 | 77     | MALE   | Stage IB   | T2a | MX | N0 |
| TCGA-55-7284 | 243  | 1 | 74     | MALE   | Stage IIB  | T3  | MX | N0 |
| TCGA-55-1595 | 1479 | 0 | 74     | FEMALE | Stage IA   | T1  | M0 | N0 |
| TCGA-44-2655 | 1324 | 0 | 65     | FEMALE | Stage IA   | T1  | M0 | N0 |
| TCGA-69-8453 | 813  | 0 | 77     | MALE   | Stage IIB  | T3  | MX | N0 |
| TCGA-91-6835 | 79   | 0 | 81     | FEMALE | Stage IA   | T1  | M0 | N0 |
| TCGA-95-8039 | 830  | 0 | 72     | MALE   | Stage IA   | T1  | MX | N0 |
| TCGA-97-7938 | 18   | 1 | 76     | FEMALE | Stage IA   | T1a | MX | N0 |
| TCGA-69-7978 | 134  | 0 | 59     | MALE   | Stage IIB  | T2b | MX | N1 |
| TCGA-55-7994 | 603  | 0 | 81     | MALE   | Stage IIB  | T3  | MX | N0 |
| TCGA-55-8619 | 416  | 0 | 72     | FEMALE | Stage IIB  | T3  | MX | N0 |
| TCGA-78-7149 | 3940 | 0 | 71     | MALE   | Stage IIIB | T4  | M0 | N0 |
| TCGA-38-4631 | 354  | 1 | 72     | FEMALE | Stage IB   | T2  | M0 | N0 |
| TCGA-44-2662 | 1280 | 0 | 65     | MALE   | Stage IB   | T2  | M0 | N0 |
| TCGA-MP-A4SV | 2620 | 1 | 67     | MALE   | Stage IB   | T2  | M0 | N0 |
| TCGA-L9-A7SV | 565  | 0 | 69     | MALE   | Stage IIA  | T2a | M0 | N1 |
| TCGA-93-A4JQ | 526  | 0 | 49     | MALE   | Stage IA   | T1b | MX | N0 |
| TCGA-35-3615 | 14   | 0 | 57     | MALE   | Stage IB   | T2  | M0 | N0 |
| TCGA-05-4418 | 274  | 1 | 69     | MALE   | Stage IIIA | T3  | M0 | N2 |
| TCGA-05-4249 | 1523 | 0 | 67     | MALE   | Stage IB   | T2  | M0 | N0 |
| TCGA-MN-A4N4 | 1175 | 0 | 57     | MALE   | Stage IA   | T1b | M0 | N0 |
| TCGA-73-4658 | 1600 | 1 | 80     | FEMALE | Stage IB   | T2  | M0 | N0 |
| TCGA-44-A4SS | 415  | 0 | 73     | MALE   | Stage IA   | T1b | M0 | N0 |
| TCGA-95-A4VP | 605  | 0 | 66     | FEMALE | Stage IIIA | T2b | M0 | N2 |
| TCGA-55-7914 | 187  | 1 | 71     | FEMALE | Stage IIA  | T1b | MX | N1 |
| TCGA-78-7145 | 826  | 1 | 52     | FEMALE | Stage IV   | T4  | M1 | N1 |
| TCGA-55-8092 | 154  | 1 | 75     | MALE   | Stage IIB  | T3  | MX | N0 |
| TCGA-MP-A4TE | 896  | 1 | 56     | MALE   | Stage IIA  | T2b | MX | N0 |
| TCGA-MP-A4T4 | 2617 | 1 | 68     | FEMALE | Stage IIB  | T2  | M0 | N1 |
| TCGA-55-8203 | 547  | 0 | 69     | FEMALE | Stage IA   | T1b | M0 | N0 |
| TCGA-55-6712 | 171  | 1 | 71     | MALE   | Stage IIA  | T2a | MX | N1 |
| TCGA-49-6743 | 1621 | 0 | 81     | FEMALE | Stage IIIA | T1  | MX | N2 |
| TCGA-73-4668 | 467  | 0 | 66     | FEMALE | Stage IIB  | T2  | M0 | N1 |

|              |      |   |        |        |            |     |    |    |
|--------------|------|---|--------|--------|------------|-----|----|----|
| TCGA-67-3770 | 610  | 0 | 70     | FEMALE | Stage IA   | T1  | M0 | N0 |
| TCGA-64-1680 | 1126 | 0 | 63     | MALE   | Stage IV   | T2a | M1 | N2 |
| TCGA-05-4398 | 1431 | 0 | 47     | FEMALE | Stage IIIB | T4  | M0 | N3 |
| TCGA-78-7155 | 1171 | 1 | 68     | MALE   | Stage IB   | T2  | M0 | N0 |
| TCGA-78-7152 | 1215 | 1 | 65     | MALE   | Stage IB   | T2  | M0 | N0 |
| TCGA-75-6211 |      | 1 | unknow | FEMALE | Stage IB   | T2  | M0 | N0 |
| TCGA-MP-A4T6 | 1790 | 1 | 76     | FEMALE | Stage IIIA | T1  | MX | N2 |
| TCGA-55-A57B | 546  | 0 | 80     | FEMALE | Stage IA   | T1b | M0 | N0 |
| TCGA-44-2656 | 1429 | 0 | 59     | MALE   | Stage IB   | T2  | M0 | N0 |
| TCGA-93-A4JO | 33   | 1 | 70     | MALE   | Stage IA   | T1a | MX | N0 |
| TCGA-78-7535 | 949  | 1 | 45     | MALE   | Stage IB   | T2  | M0 | N0 |
| TCGA-62-8398 | 444  | 1 | 55     | MALE   | Stage IIIA | T2  | M0 | N2 |
| TCGA-91-6840 | 372  | 0 | 59     | FEMALE | Stage IA   | T1b | M0 | N0 |
| TCGA-75-5122 |      | 1 | unknow | MALE   | Stage IB   | T2  | M0 | N0 |
| TCGA-99-8025 | 1060 | 0 | 72     | FEMALE | Stage IIIA | T3  | M0 | N2 |
| TCGA-55-8207 | 977  | 0 | 73     | MALE   | Stage IB   | T2a | MX | N0 |
| TCGA-55-6969 | 1239 | 0 | 52     | MALE   | Stage IB   | T2  | M0 | N0 |
| TCGA-64-5774 | 2676 | 0 | 60     | MALE   | Stage IB   | T2  | M0 | N0 |
| TCGA-O1-A52J | 1798 | 1 | 74     | FEMALE | Stage IA   | T1  | MX | N0 |
| TCGA-86-6851 | 179  | 0 | 73     | FEMALE | Stage IIA  | T1b | M0 | N1 |
| TCGA-62-8395 | 1216 | 0 | 80     | FEMALE | Stage IIB  | T3  | M0 | N0 |
| TCGA-86-A4P7 | 415  | 0 | 63     | FEMALE | Stage IB   | T2a | M0 | N0 |
| TCGA-91-6831 | 310  | 0 | 66     | MALE   | Stage IB   | T2  | MX | N0 |
| TCGA-05-4420 | 912  | 0 | 41     | MALE   | Stage IB   | T2  | M0 | N0 |
| TCGA-05-4395 | 0    | 1 | 76     | MALE   | Stage IIIB | T4  | M0 | N2 |
| TCGA-67-6217 | 422  | 0 | 73     | FEMALE | Stage IIA  | T2a | M0 | N1 |
| TCGA-44-4112 | 808  | 1 | 60     | FEMALE | Stage IB   | T2a | M0 | N0 |
| TCGA-49-AAR2 | 2224 | 0 | 64     | MALE   | Stage IB   | T2  | MX | N0 |
| TCGA-62-A46O | 1454 | 1 | 65     | FEMALE | Stage IB   | T2  | M0 | N0 |
| TCGA-44-7660 | 592  | 0 | 72     | MALE   | Stage IB   | T2  | MX | N0 |
| TCGA-44-3919 | 1026 | 1 | 71     | FEMALE | Stage IA   | T1  | M0 | N0 |
| TCGA-44-6775 | 705  | 0 | 72     | FEMALE | Stage IB   | T2a | MX | N0 |
| TCGA-97-7554 | 775  | 0 | 83     | FEMALE | Stage IIIA | T2a | M0 | N2 |
| TCGA-86-6562 | 376  | 1 | 52     | MALE   | Stage IIA  | T2a | M0 | N1 |
| TCGA-55-6642 | 2449 | 0 | 63     | MALE   | Stage IB   | T2  | MX | N0 |
| TCGA-62-A471 | 1246 | 0 | 64     | MALE   | Stage IIB  | T2b | M0 | N1 |
| TCGA-05-5715 | 62   | 0 | 69     | FEMALE | Stage IB   | T2a | M0 | N0 |



Table S5. The gene set enrichment analysis between the high-  
and low-risk subgroups

| ID  | setSize | enrichmentScore | NES      | pvalue   | p.adjust | qvalues  | rank |
|-----|---------|-----------------|----------|----------|----------|----------|------|
| #1  | 108     | -0.78347        | -1.94129 | 1.00E-10 | 1.83E-08 | 1.61E-08 | 2117 |
| #2  | 36      | -0.82145        | -1.86182 | 1.48E-06 | 0.000135 | 0.000119 | 2602 |
| #3  | 177     | 0.447522        | 1.74263  | 1.14E-05 | 0.000696 | 0.000613 | 1920 |
| #4  | 29      | -0.81464        | -1.81128 | 2.94E-05 | 0.001154 | 0.001015 | 1887 |
| #5  | 30      | -0.80439        | -1.80192 | 3.69E-05 | 0.001154 | 0.001015 | 2709 |
| #6  | 99      | -0.65877        | -1.62257 | 3.78E-05 | 0.001154 | 0.001015 | 3031 |
| #7  | 20      | -0.83547        | -1.77066 | 8.01E-05 | 0.002094 | 0.001842 | 2594 |
| #8  | 23      | 0.773562        | 2.178365 | 0.000183 | 0.004187 | 0.003685 | 1396 |
| #9  | 72      | -0.65598        | -1.58529 | 0.000598 | 0.012162 | 0.010703 | 3027 |
| #10 | 71      | 0.540156        | 1.864178 | 0.001092 | 0.019978 | 0.017582 | 1840 |
| #11 | 164     | -0.56256        | -1.41309 | 0.001811 | 0.027615 | 0.024303 | 3027 |
| #12 | 35      | -0.71845        | -1.62488 | 0.001884 | 0.027615 | 0.024303 | 2709 |
| #13 | 57      | -0.6646         | -1.59091 | 0.001962 | 0.027615 | 0.024303 | 3431 |
| #14 | 31      | -0.73701        | -1.65933 | 0.002873 | 0.037555 | 0.033051 | 2709 |
| #15 | 113     | -0.58248        | -1.44813 | 0.003225 | 0.039339 | 0.034621 | 2709 |
| #16 | 30      | -0.72247        | -1.61841 | 0.004    | 0.045748 | 0.040261 | 2709 |
| #17 | 98      | -0.5811         | -1.42895 | 0.006952 | 0.074836 | 0.065861 | 3027 |
| #18 | 58      | -0.61572        | -1.47027 | 0.009152 | 0.092892 | 0.081752 | 3307 |
| #19 | 67      | -0.60473        | -1.45947 | 0.009645 | 0.092892 | 0.081752 | 3344 |
| #20 | 71      | -0.59293        | -1.43486 | 0.010385 | 0.095024 | 0.083627 | 2786 |
| #21 | 111     | 0.396354        | 1.433297 | 0.011518 | 0.097331 | 0.085658 | 2571 |
| #22 | 44      | 0.541685        | 1.738763 | 0.011701 | 0.097331 | 0.085658 | 2793 |
| #23 | 28      | 0.589287        | 1.768519 | 0.015211 | 0.118001 | 0.103849 | 276  |
| #24 | 28      | 0.585709        | 1.757781 | 0.015476 | 0.118001 | 0.103849 | 652  |
| #25 | 83      | -0.56495        | -1.38175 | 0.02355  | 0.169521 | 0.14919  | 3951 |
| #26 | 26      | 0.577483        | 1.717124 | 0.024085 | 0.169521 | 0.14919  | 2722 |
| #27 | 21      | -0.68579        | -1.46051 | 0.035672 | 0.241776 | 0.212779 | 919  |
| #28 | 12      | -0.75192        | -1.44868 | 0.043194 | 0.271988 | 0.239368 | 3177 |
| #29 | 193     | -0.4933         | -1.24244 | 0.04431  | 0.271988 | 0.239368 | 2998 |
| #30 | 41      | 0.47476         | 1.492806 | 0.044588 | 0.271988 | 0.239368 | 1526 |

| ID  | Name                                              |
|-----|---------------------------------------------------|
| #1  | KEGG_SYSTEMIC_LUPUS_ERYTHEMATOSUS                 |
| #2  | KEGG_INTESTINAL_IMMUNE_NETWORK_FOR_IGA_PRODUCTION |
| #3  | KEGG_FOCAL_ADHESION                               |
| #4  | KEGG_PRIMARY_IMMUNODEFICIENCY                     |
| #5  | KEGG_ALLOGRAFT_REJECTION                          |
| #6  | KEGG_T_CELL_RECEPTOR_SIGNALING_PATHWAY            |
| #7  | KEGG_ASTHMA                                       |
| #8  | KEGG_PENTOSE_PHOSPHATE_PATHWAY                    |
| #9  | KEGG_B_CELL_RECEPTOR_SIGNALING_PATHWAY            |
| #10 | KEGG_ECM_RECEPTOR_INTERACTION                     |
| #11 | KEGG_CHEMOKINE_SIGNALING_PATHWAY                  |
| #12 | KEGG_TYPE_I_DIABETES_MELLITUS                     |
| #13 | KEGG_ANTIGEN_PROCESSING_AND_PRESENTATION          |

|     |                                                |
|-----|------------------------------------------------|
| #14 | KEGG_GRAFT_VERSUS_HOST_DISEASE                 |
| #15 | KEGG_CELL_ADHESION_MOLECULES_CAMS              |
| #16 | KEGG_AUTOIMMUNE_THYROID_DISEASE                |
| #17 | KEGG_NATURAL_KILLER_CELL_MEDIATED_CYTOTOXICITY |
| #18 | KEGG_VIRAL_MYOCARDITIS                         |
| #19 | KEGG_LEISHMANIA_INFECTION                      |
| #20 | KEGG_HEMATOPOIETIC_CELL_LINEAGE                |
| #21 | KEGG_AXON_GUIDANCE                             |
| #22 | KEGG_GLUTATHIONE_METABOLISM                    |
| #23 | KEGG_RETINOL_METABOLISM                        |
| #24 | KEGG_DRUG_METABOLISM_OTHER_ENZYMES             |
| #25 | KEGG_TOLL_LIKE_RECEPTOR_SIGNALING_PATHWAY      |
| #26 | KEGG_BUTANOATE_METABOLISM                      |
| #27 | KEGG_OLFACTORY_TRANSDUCTION                    |
| #28 | KEGG_PRIMARY_BILE_ACID_BIOSYNTHESIS            |
| #29 | KEGG_CYTOKINE_CYTOKINE_RECEPTOR_INTERACTION    |
| #30 | KEGG_DRUG_METABOLISM_CYTOCHROME_P450           |

Table S6. The differential genes between the high- and low-risk subgroups

| genes     | logFC    |
|-----------|----------|
| LRRC38    | 5.77209  |
| ITLN1     | 5.093469 |
| CGB5      | 5.0637   |
| SPINK4    | 5.018862 |
| WFDC5     | 4.863646 |
| MSTN      | 4.85163  |
| REG4      | 3.462981 |
| TKTL1     | 3.317839 |
| BHMT      | 3.201467 |
| PCSK2     | 2.601331 |
| WFDC12    | 2.596349 |
| CASP14    | 2.544977 |
| CYP2A6    | 2.437882 |
| FABP7     | 2.207876 |
| TM4SF20   | 2.204879 |
| PRG4      | 2.129739 |
| KRT20     | 2.108255 |
| MYBPC1    | 2.027449 |
| RHCG      | 1.969365 |
| PI3       | 1.925202 |
| SPANXB1   | 1.914373 |
| MAGEB2    | 1.873272 |
| KRT75     | 1.83063  |
| BPIFB4    | 1.819879 |
| C8A       | 1.790626 |
| NNAT      | 1.776173 |
| MUCL1     | 1.730919 |
| MUCL3     | 1.728357 |
| CGA       | 1.722207 |
| PNMA5     | 1.695974 |
| LINC00922 | 1.695028 |
| IL11      | 1.691951 |
| COL2A1    | 1.66523  |
| GUCA2B    | 1.648576 |
| ALPP      | 1.638716 |
| KRT81     | 1.622893 |
| PICSAR    | 1.616223 |
| GCG       | 1.610601 |
| RNA5-8SP4 | 1.610593 |
| RNA5-8SP2 | 1.607272 |
| BMX       | 1.58001  |
| IBSP      | 1.572115 |
| MAEL      | 1.563401 |
| MAGEA4    | 1.53959  |

|            |          |
|------------|----------|
| UPK1B      | 1.519657 |
| LINC00941  | 1.507221 |
| L1CAM      | 1.492518 |
| IGF2BP1    | 1.466408 |
| FLNC       | 1.460028 |
| AL355916.1 | 1.459204 |
| LYPD2      | 1.454452 |
| GAGE2A     | 1.45111  |
| SFRP1      | 1.444445 |
| FBN2       | 1.432985 |
| MFAP5      | 1.430841 |
| PRR20G     | 1.410451 |
| NTSR1      | 1.405714 |
| IL1A       | 1.40561  |
| AC003092.1 | 1.40216  |
| AL161431.1 | 1.394849 |
| PTPRR      | 1.384654 |
| CD177      | 1.384526 |
| UGT1A10    | 1.358814 |
| MT1A       | 1.35077  |
| ARL14      | 1.317029 |
| AC026785.3 | 1.311899 |
| WNT7A      | 1.305529 |
| AC245041.1 | 1.276577 |
| MAGEA10    | 1.265337 |
| HMGA2      | 1.263004 |
| PRSS3      | 1.2572   |
| S100A8     | 1.254445 |
| S100A2     | 1.23664  |
| SPX        | 1.234377 |
| APCDD1L    | 1.226511 |
| PAGE1      | 1.202966 |
| MTCO2P22   | 1.198571 |
| AC079949.1 | 1.198534 |
| ADH7       | 1.193546 |
| AKR1B10    | 1.187747 |
| CRABP1     | 1.182868 |
| GNRH2      | 1.181262 |
| UCA1       | 1.135296 |
| S100A12    | 1.134962 |
| REG1A      | 1.128967 |
| ECEL1      | 1.124277 |
| C11orf53   | 1.116484 |
| PRB3       | 1.116215 |
| TFF2       | 1.10781  |
| RPS26P47   | 1.104639 |
| SPOCK1     | 1.092716 |
| MUC5AC     | 1.091366 |
| HMGCS2     | 1.085384 |

|            |          |
|------------|----------|
| LINC00460  | 1.078901 |
| CYP1A1     | 1.072883 |
| AGTR2      | 1.06832  |
| MAGEA1     | 1.053921 |
| KRT17      | 1.052473 |
| LINC02617  | 1.04324  |
| CNMD       | 1.040852 |
| ELOVL3     | 1.033271 |
| AC022784.1 | 1.032325 |
| IL20RB     | 1.024204 |
| PAGE2      | 1.017271 |
| CDA        | 1.015468 |
| ADH1C      | 1.012369 |
| ANXA8      | 1.009556 |
| INHA       | 1.001223 |
| SCGB3A1    | 0.998306 |
| PRSS1      | 0.997704 |
| MIR31HG    | 0.98239  |
| MIR205HG   | 0.970571 |
| GJB3       | 0.96818  |
| EEF1A2     | 0.964264 |
| IFNWP19    | 0.960663 |
| H19        | 0.960427 |
| CLDN6      | 0.955193 |
| SERTM1     | 0.950803 |
| NFE4       | 0.94168  |
| PAX8       | 0.941592 |
| LYPD3      | 0.939495 |
| SLC10A2    | 0.937731 |
| GTSF1      | 0.935252 |
| ANKRD1     | 0.922819 |
| NMRAL2P    | 0.922716 |
| AC005336.1 | 0.921071 |
| MSLN       | 0.912468 |
| HES2       | 0.910022 |
| AF274573.1 | 0.907673 |
| GNLY       | 0.898218 |
| AKAP12     | 0.894397 |
| NDP        | 0.890693 |
| FER1L6     | 0.885863 |
| INSL4      | 0.885768 |
| FOSL1      | 0.883756 |
| CLRN3      | 0.880914 |
| PPBP       | 0.880777 |
| LINC01980  | 0.869656 |
| AC018629.1 | 0.866006 |
| RASL10B    | 0.865306 |
| RNA5-8SP6  | 0.863819 |
| MMP11      | 0.861186 |

|            |          |
|------------|----------|
| LAMC2      | 0.855959 |
| POPDC3     | 0.850887 |
| FGF12      | 0.850674 |
| PRSS2      | 0.845783 |
| B3GALT5    | 0.835431 |
| AC239859.5 | 0.831119 |
| TGFBI      | 0.830386 |
| TMSB15A    | 0.829064 |
| MYO16-AS1  | 0.820272 |
| CYP11A1    | 0.816109 |
| CDHR5      | 0.81557  |
| AC245041.2 | 0.808441 |
| CYP4F11    | 0.803369 |
| CA2        | 0.803338 |
| PSCA       | 0.80327  |
| C11orf86   | 0.803245 |
| HOXC12     | 0.798625 |
| CDHR2      | 0.798386 |
| ANXA10     | 0.798149 |
| NCCRP1     | 0.795815 |
| LINP1      | 0.795215 |
| CSAG1      | 0.792818 |
| DKK1       | 0.790566 |
| 5_8S_rRNA  | 0.789106 |
| GKN2       | 0.788584 |
| SCX        | 0.785875 |
| AC079949.2 | 0.78538  |
| NRK        | 0.780601 |
| COL9A3     | 0.773406 |
| KLK6       | 0.770771 |
| TNS4       | 0.769407 |
| MSMB       | 0.767966 |
| EYA1       | 0.767228 |
| RSPO3      | 0.765168 |
| GPA33      | 0.760637 |
| LINC01133  | 0.757954 |
| VEGFC      | 0.756868 |
| TINCR      | 0.754866 |
| AL365181.2 | 0.753692 |
| AL049555.1 | 0.752942 |
| TRIM29     | 0.749249 |
| FAM83B     | 0.748794 |
| MYBPH      | 0.748191 |
| GRAMD1B    | 0.743815 |
| CES1       | 0.742699 |
| KRT6A      | 0.742239 |
| HBE1       | 0.73665  |
| KYNU       | 0.735975 |
| ANGPTL4    | 0.735081 |

|            |          |
|------------|----------|
| ANPEP      | 0.732464 |
| TAC3       | 0.722078 |
| KIAA0319   | 0.719836 |
| TMEM59L    | 0.718632 |
| COL11A1    | 0.718609 |
| PPP2R2C    | 0.717675 |
| CRISPLD1   | 0.714747 |
| PTGR1      | 0.712019 |
| MAGEA3     | 0.710233 |
| NPTX2      | 0.709255 |
| MAGEA6     | 0.709219 |
| CALB2      | 0.707643 |
| CYSRT1     | 0.707635 |
| AC092868.1 | 0.704609 |
| HTR1D      | 0.704323 |
| SERPINB7   | 0.703994 |
| CBR3       | 0.696425 |
| COL11A2    | 0.696299 |
| RHOV       | 0.696025 |
| LINC01559  | 0.695817 |
| SLCO1B3    | 0.691481 |
| MELTF      | 0.690413 |
| LAMA3      | 0.689228 |
| MIR193BHG  | 0.687876 |
| RAET1G     | 0.685675 |
| TMEM130    | 0.680404 |
| FNDC4      | 0.677782 |
| C16orf74   | 0.6776   |
| FGFBP2     | 0.676206 |
| DNER       | 0.674921 |
| LOXL2      | 0.672705 |
| LINC01511  | 0.671959 |
| LUCAT1     | 0.66749  |
| FSTL3      | 0.667241 |
| TRIM48     | 0.666802 |
| FNDC1      | 0.663844 |
| KRTDAP     | 0.661209 |
| RGS20      | 0.661032 |
| SOX11      | 0.658616 |
| F2RL2      | 0.656839 |
| AC027288.2 | 0.656682 |
| CA12       | 0.655903 |
| PCSK9      | 0.652949 |
| CLIC3      | 0.648543 |
| SLC15A1    | 0.648291 |
| G0S2       | 0.647001 |
| COL12A1    | 0.646864 |
| APOBEC1    | 0.644914 |
| CRYBG2     | 0.644128 |

|            |          |
|------------|----------|
| RBP2       | 0.6432   |
| SPDYC      | 0.642724 |
| KRT80      | 0.639623 |
| MAGEA12    | 0.635833 |
| NREP       | 0.634474 |
| SLC16A1    | 0.633884 |
| SERPINB5   | 0.632749 |
| AC129507.4 | 0.629909 |
| ACKR3      | 0.629565 |
| KRT16      | 0.628475 |
| COL7A1     | 0.627589 |
| APLN       | 0.626652 |
| SMOC1      | 0.626497 |
| SLC2A1     | 0.623029 |
| PDX1       | 0.621847 |
| LINC02154  | 0.621445 |
| LINC01597  | 0.621186 |
| CXCL5      | 0.61849  |
| ECEL1P2    | 0.617552 |
| AC004847.1 | 0.617163 |
| AARD       | 0.617013 |
| NUPR2      | 0.616833 |
| AP000695.2 | 0.615668 |
| TRIM16L    | 0.6126   |
| AL513318.1 | 0.611485 |
| TM4SF4     | 0.610395 |
| FSCN1      | 0.608734 |
| ITGA5      | 0.608191 |
| FBN3       | 0.608108 |
| PDPN       | 0.607668 |
| ALPG       | 0.606487 |
| MESP2      | 0.605643 |
| EDIL3      | 0.605614 |
| SBSN       | 0.604853 |
| MDFI       | 0.601895 |
| UGT2B15    | 0.59951  |
| ALDOB      | 0.599455 |
| GJB5       | 0.591901 |
| PLCD3      | 0.589604 |
| HHIP       | 0.58573  |
| AC073325.2 | 0.58478  |
| SHISA3     | 0.582101 |
| S100A1     | 0.581286 |
| NMU        | 0.581093 |
| LASTR      | 0.579826 |
| ACE2       | 0.576063 |
| LINC01088  | 0.576044 |
| OVOL1      | 0.575931 |
| TREML3P    | 0.575566 |



|            |          |
|------------|----------|
| AP000695.1 | 0.571421 |
| FAM133A    | 0.571006 |
| S100P      | 0.570569 |
| UPK2       | 0.569685 |
| TFF1       | 0.568404 |
| BCL2L10    | 0.567684 |
| PTGES      | 0.564895 |
| GLI3       | 0.564233 |
| RASD2      | 0.564024 |
| SLC7A11    | 0.562749 |
| LINC00973  | 0.555947 |
| RAET1E     | 0.555933 |
| ELFN1-AS1  | 0.554982 |
| MSLN       | 0.552235 |
| IGFBP3     | 0.552122 |
| ZFP42      | 0.551466 |
| F3         | 0.550399 |
| CYP4F3     | 0.548404 |
| SLAMF9     | 0.547683 |
| HOXA1      | 0.547573 |
| AC084375.1 | 0.547451 |
| VSIG10L    | 0.545872 |
| CHAD       | 0.543658 |
| PLPP4      | 0.542584 |
| CAV2       | 0.542116 |
| KISS1      | 0.539465 |
| TNNT2      | 0.539077 |
| HHIPL2     | 0.537751 |
| AP003119.3 | 0.537616 |
| GPAT3      | 0.535227 |
| MME        | 0.534858 |
| SRXN1      | 0.53441  |
| AKR1B15    | 0.533292 |
| VGLL1      | 0.531878 |
| FOXE1      | 0.528733 |
| P3H2       | 0.528104 |
| GCLC       | 0.528072 |
| PLAU       | 0.52792  |
| NR0B1      | 0.527524 |
| OPN3       | 0.526695 |
| HOXA10     | 0.524789 |
| AL109615.3 | 0.524727 |
| RPL29P19   | 0.52366  |
| ASAP2      | 0.522771 |
| CACNG4     | 0.522556 |
| PTX3       | 0.522375 |
| F2RL1      | 0.521756 |
| CNGA1      | 0.52063  |
| ARNTL2     | 0.520512 |

|            |          |
|------------|----------|
| PCOLCE2    | 0.519745 |
| PLEK2      | 0.51931  |
| RRAS2P1    | 0.519236 |
| AC244153.1 | 0.518306 |
| SHOX2      | 0.51749  |
| FAM171A2   | 0.517298 |
| ODC1       | 0.517188 |
| FAM3D      | 0.517069 |
| COL10A1    | 0.515255 |
| PKP2       | 0.514922 |
| BMPR1B     | 0.514747 |
| LINC01116  | 0.514415 |
| FJX1       | 0.514247 |
| AC079384.1 | 0.514222 |
| CAV1       | 0.512929 |
| FNDC5      | 0.512529 |
| PANX2      | 0.511565 |
| UGDH       | 0.509797 |
| SNAI2      | 0.507654 |
| PMEPA1     | 0.505988 |
| TSPAN8     | 0.505149 |
| FAM83A     | 0.504168 |
| SOX15      | 0.503313 |
| CABYR      | 0.501734 |
| AC102953.2 | 0.501713 |
| TSKU       | 0.500445 |
| LINGO1     | 0.49982  |
| COLCA2     | 0.499057 |
| TRIM16     | 0.498846 |
| PGC        | 0.498505 |
| FGFR3      | 0.498462 |
| CSF2       | 0.49842  |
| S100A9     | 0.494621 |
| TFAP2A     | 0.493706 |
| IL22RA1    | 0.493306 |
| NMB        | 0.492301 |
| SEMA6D     | 0.492011 |
| MYEOV      | 0.491965 |
| CMBL       | 0.491877 |
| VGLL3      | 0.4916   |
| ITGA6      | 0.491172 |
| CITED4     | 0.490839 |
| MAGEC1     | 0.489453 |
| ANLN       | 0.489279 |
| PGF        | 0.48909  |
| RPL23AP77  | 0.486346 |
| MSX2       | 0.486093 |
| HEPACAM2   | 0.485688 |
| CHST4      | 0.485362 |

|            |          |
|------------|----------|
| FAM180A    | 0.485223 |
| AIF1L      | 0.484494 |
| TNFRSF12A  | 0.480989 |
| KCNJ12     | 0.480514 |
| ADM        | 0.480422 |
| ITGA11     | 0.479909 |
| SUGCT      | 0.479518 |
| ASPH       | 0.479426 |
| SRMS       | 0.479362 |
| EMSLR      | 0.479292 |
| CTSV       | 0.479164 |
| SCAT1      | 0.478944 |
| CBR1       | 0.478857 |
| MTCO3P12   | 0.477159 |
| ALDH3A1    | 0.474757 |
| BASP1      | 0.474115 |
| KRT7       | 0.473621 |
| AC027288.3 | 0.473592 |
| STC1       | 0.47241  |
| TMEM213    | 0.471578 |
| MTCO1P40   | 0.469431 |
| GREB1      | 0.468925 |
| NAT8L      | 0.467848 |
| LAMB3      | 0.467503 |
| ADSS1      | 0.466354 |
| TCEAL2     | 0.46591  |
| ITGB1P1    | 0.462568 |
| SERPINE1   | 0.46045  |
| IGFBP6     | 0.460441 |
| EPHX3      | 0.459548 |
| BCAS1      | 0.458187 |
| LDLRAD3    | 0.457472 |
| MT1L       | 0.456491 |
| TCN1       | 0.45584  |
| GPR87      | 0.455525 |
| FABP5P7    | 0.455453 |
| LINC01705  | 0.455333 |
| MTCO2P12   | 0.455266 |
| CDR2L      | 0.455047 |
| ADGRG3     | 0.454962 |
| SLCO4A1    | 0.453563 |
| SDCBP2     | 0.452335 |
| MAFK       | 0.451826 |
| C5AR2      | 0.45179  |
| NOS3       | 0.451648 |
| GJB2       | 0.451465 |
| NAMPTP1    | 0.451409 |
| GSEC       | 0.450084 |
| DCBLD2     | 0.449424 |

|            |          |
|------------|----------|
| RHOD       | 0.449162 |
| ELFN1      | 0.448826 |
| ESM1       | 0.447858 |
| VWDE       | 0.447614 |
| UBBP1      | 0.447503 |
| ITGB1-DT   | 0.445855 |
| NKILA      | 0.445151 |
| SERPINA4   | 0.443513 |
| PHLDB2     | 0.442968 |
| CLGN       | 0.442941 |
| RAC3       | 0.442572 |
| HPDL       | 0.442344 |
| ARHGEF4    | 0.441745 |
| FASN       | 0.439873 |
| MFAP2      | 0.43956  |
| MIR100HG   | 0.439441 |
| NXPH4      | 0.439123 |
| AC106771.1 | 0.438499 |
| PODNL1     | 0.437935 |
| SLC16A3    | 0.437079 |
| CDCP1      | 0.436496 |
| LINC02544  | 0.435641 |
| GJC1       | 0.435599 |
| GUCA2A     | 0.43459  |
| LOX        | 0.434205 |
| S100A16    | 0.43401  |
| POU2F3     | 0.432652 |
| AMH        | 0.428452 |
| GABRP      | 0.427889 |
| VSIG1      | 0.427739 |
| AL365181.3 | 0.427393 |
| SLC16A12   | 0.427354 |
| LINC01983  | 0.42642  |
| EPHA2      | 0.426187 |
| AC104031.1 | 0.425818 |
| BCAR3      | 0.425607 |
| MYOSLID    | 0.425254 |
| UPK3B      | 0.425125 |
| HOXD8      | 0.424943 |
| RIMKLB     | 0.424858 |
| JPH2       | 0.424547 |
| BTNL10     | 0.424326 |
| KRT86      | 0.42353  |
| GPC1       | 0.423227 |
| TMPRSS3    | 0.422169 |
| IER5L      | 0.421468 |
| COL17A1    | 0.421017 |
| LRFN4      | 0.420941 |
| ADGRF4     | 0.420923 |

|            |          |
|------------|----------|
| IL17RD     | 0.420428 |
| NEIL3      | 0.419627 |
| C5orf46    | 0.419385 |
| PADI3      | 0.418698 |
| SLC6A3     | 0.418417 |
| TGFB2      | 0.418333 |
| IL17RE     | 0.418203 |
| HMGA1      | 0.41692  |
| KLB        | 0.416123 |
| KLK5       | 0.415966 |
| CYP2T1P    | 0.415352 |
| DIRAS1     | 0.410673 |
| TMIE       | 0.410372 |
| MAMLD1     | 0.410122 |
| ADAMTSL5   | 0.409058 |
| PRRX2      | 0.408732 |
| SPINK2     | 0.408681 |
| AVPI1      | 0.407585 |
| SHH        | 0.40646  |
| SEMA3B     | 0.40555  |
| ERRFI1     | 0.405059 |
| SLC28A2    | 0.404453 |
| CD109      | 0.404417 |
| CYP2B7P    | 0.403319 |
| SEMA7A     | 0.402395 |
| DIAPH3     | 0.401658 |
| GRHL3      | 0.401297 |
| CEMIP      | 0.401268 |
| DYNC1I1    | 0.400701 |
| PXDN       | 0.400271 |
| AL033397.1 | 0.400172 |
| TMPRSS11E  | 0.399888 |
| COL4A5     | 0.398702 |
| PCDH7      | 0.398364 |
| PROCR      | 0.398144 |
| HOXB13     | 0.397985 |
| ZIC2       | 0.39789  |
| LINC02577  | 0.397522 |
| TRIM17     | 0.396083 |
| TNS1-AS1   | 0.39597  |
| SLC45A1    | 0.395875 |
| CKMT1A     | 0.395857 |
| GPC6       | 0.395307 |
| B3GNT4     | 0.395225 |
| LINC01614  | 0.394671 |
| BTBD11     | 0.394516 |
| HSPA6      | 0.394307 |
| TGM1       | 0.39408  |
| AC091042.1 | 0.394066 |

|            |          |
|------------|----------|
| PLOD2      | 0.394019 |
| ASPN       | 0.393147 |
| AP001574.1 | 0.392896 |
| C19orf33   | 0.39284  |
| ELANE      | 0.392616 |
| EPS8L3     | 0.391321 |
| GPM6A      | 0.390199 |
| MT2A       | 0.38988  |
| ZP3        | 0.389428 |
| TNNT1      | 0.389137 |
| EGF        | 0.388701 |
| FXD4       | 0.387733 |
| FBXO2      | 0.387316 |
| LYRM4-AS1  | 0.387233 |
| MMP17      | 0.385868 |
| PLAT       | 0.385596 |
| HS3ST3A1   | 0.385508 |
| ITGB4      | 0.385107 |
| AL512274.1 | 0.384942 |
| GCLM       | 0.384723 |
| SDK2       | 0.384639 |
| RNU6-1161P | 0.383794 |
| PCSK6      | 0.383638 |
| PWWP3B     | 0.383536 |
| NDUFA4L2   | 0.383352 |
| SLITRK6    | 0.383018 |
| RSPO1      | 0.382522 |
| TUBA3C     | 0.380925 |
| TDRD5      | 0.380823 |
| IGF2BP3    | 0.380714 |
| CSPG4      | 0.380246 |
| RADIL      | 0.379929 |
| ANO1       | 0.379357 |
| MAGEA8     | 0.379111 |
| KISS1R     | 0.378499 |
| AMDHD1     | 0.378383 |
| CLDN8      | 0.377821 |
| RNF223     | 0.377513 |
| MYO1E      | 0.37751  |
| TGFB2-AS1  | 0.376593 |
| EPHB3      | 0.376442 |
| PLAUR      | 0.376209 |
| RHOF       | 0.376175 |
| MEDAG      | 0.375882 |
| AP003119.1 | 0.375683 |
| NACAD      | 0.375672 |
| RHBDL2     | 0.375643 |
| EGFR       | 0.375475 |
| KANK4      | 0.374736 |

|            |          |
|------------|----------|
| LGR5       | 0.373003 |
| AATK       | 0.372343 |
| GSTA1      | 0.370769 |
| PGD        | 0.369878 |
| PDGFA      | 0.369356 |
| PNMT       | 0.368944 |
| RPL37P23   | 0.36893  |
| CDH3       | 0.368545 |
| IER3       | 0.368129 |
| HOXA4      | 0.367723 |
| NGEF       | 0.367637 |
| AKR1C1     | 0.367627 |
| CAP2       | 0.367278 |
| STC2       | 0.366589 |
| TXNRD1     | 0.366241 |
| LINC02041  | 0.366117 |
| NIPAL1     | 0.365847 |
| AZU1       | 0.365388 |
| GPX8       | 0.365127 |
| PROM2      | 0.364543 |
| ITGB1      | 0.364073 |
| FIBCD1     | 0.363902 |
| SEMA3C     | 0.363341 |
| NID2       | 0.363171 |
| ARTN       | 0.362665 |
| LETM2      | 0.362162 |
| TWIST2     | 0.362119 |
| MCAM       | 0.361878 |
| AC027288.1 | 0.360789 |
| DLX4       | 0.360073 |
| NT5E       | 0.360052 |
| TINAGL1    | 0.358753 |
| PPIAP29    | 0.358349 |
| BCAT1      | 0.358088 |
| ARPC1A     | 0.357184 |
| AC002401.4 | 0.356951 |
| TTC22      | 0.356735 |
| AMOTL2     | 0.356733 |
| TUBB6      | 0.356707 |
| ULBP2      | 0.356516 |
| THBS2      | 0.356391 |
| RIN1       | 0.356223 |
| PLEKHG4B   | 0.356089 |
| MT2P1      | 0.35589  |
| LINC01508  | 0.355546 |
| NME2P1     | 0.354708 |
| C8B        | 0.354355 |
| AC121757.1 | 0.353802 |
| AC022613.1 | 0.353223 |

|            |          |
|------------|----------|
| AC063948.1 | 0.353068 |
| MET        | 0.352725 |
| FAM83A-AS1 | 0.352555 |
| BZW1P2     | 0.351765 |
| AC092171.2 | 0.351623 |
| PRAME      | 0.35121  |
| PTK6       | 0.350884 |
| MSX1       | 0.350415 |
| TES        | 0.34956  |
| HSPA1A     | 0.349044 |
| MMP10      | 0.348733 |
| BAIAP2L1   | 0.348704 |
| TGFA       | 0.348583 |
| GALNT3     | 0.347751 |
| SLC6A8     | 0.347298 |
| PPP1R1C    | 0.346929 |
| SIK1       | 0.346708 |
| MB21D2     | 0.346614 |
| SRPX       | 0.346563 |
| TK1        | 0.346444 |
| AMN        | 0.346402 |
| ADAM9      | 0.346346 |
| UBE2SP1    | 0.345859 |
| CHODL      | 0.345058 |
| CSAG3      | 0.344978 |
| RPL37P2    | 0.344969 |
| THSD4      | 0.344747 |
| IL1R2      | 0.344095 |
| HEPH       | 0.342916 |
| LSP1P4     | 0.342837 |
| GATA3      | 0.342824 |
| SLC10A4    | 0.342595 |
| HAS1       | 0.342041 |
| RPL7P1     | 0.341439 |
| IGF2BP2    | 0.34092  |
| LRRC17     | 0.339971 |
| RARG       | 0.339003 |
| CYP24A1    | 0.338997 |
| HPGD       | 0.338728 |
| WNT7B      | 0.338356 |
| SCARF2     | 0.337606 |
| KREMEN2    | 0.337549 |
| OBSL1      | 0.337539 |
| GPC2       | 0.33751  |
| PLEKHG6    | 0.336462 |
| INAVA      | 0.336052 |
| ABCC2      | 0.335827 |
| TPTEP1     | 0.335336 |
| GRIN2D     | 0.335018 |



|            |          |
|------------|----------|
| EFNA5      | 0.334969 |
| CDK6       | 0.334511 |
| HNRNPA1P10 | 0.334112 |
| HNF4A      | 0.333552 |
| CAMK2N1    | 0.333549 |
| ZNF185     | 0.332858 |
| MUC21      | 0.332663 |
| ENPP1      | 0.332426 |
| PLK2       | 0.332421 |
| IGF1R      | 0.332218 |
| C6orf52    | 0.332079 |
| ITPKA      | 0.332041 |
| EPHB6      | 0.331108 |
| TRIL       | 0.331093 |
| FSCN2      | 0.330977 |
| DLG5       | 0.330421 |
| LAD1       | 0.330405 |
| METRNL     | 0.330032 |
| EVA1B      | 0.329627 |
| AC233266.2 | 0.329398 |
| NTM        | 0.329305 |
| RBPMS2     | 0.32918  |
| RHCE       | 0.329058 |
| MIA        | 0.328209 |
| RPL4P4     | 0.328145 |
| HGD        | 0.327908 |
| CHIA       | 0.327821 |
| CGREF1     | 0.327235 |
| RBP1       | 0.32721  |
| AGR2       | 0.326768 |
| SLC22A31   | 0.32675  |
| AL512413.1 | 0.326202 |
| WNT5A-AS1  | 0.326183 |
| SSC4D      | 0.325558 |
| NOTCH3     | 0.325448 |
| FZD10      | 0.325132 |
| PTPRU      | 0.325123 |
| PRR19      | 0.325121 |
| SH3RF2     | 0.325078 |
| GPX3       | 0.32486  |
| RGS2       | 0.324664 |
| WBP1LP2    | 0.324285 |
| FAM71E1    | 0.323963 |
| RPL37P6    | 0.323708 |
| PPFIBP1    | 0.323207 |
| BARX2      | 0.32309  |
| ALPL       | 0.322868 |
| KCTD15     | 0.322716 |
| MTCL1      | 0.322533 |

|            |          |
|------------|----------|
| MYRF       | 0.322187 |
| HSP90AB3P  | 0.321315 |
| OSMR       | 0.321293 |
| MUC5B      | 0.320897 |
| IL1RL1     | 0.320849 |
| PLA2G2A    | 0.320779 |
| AC004233.2 | 0.320732 |
| CLMP       | 0.320675 |
| MAPK4      | 0.320329 |
| CILP2      | 0.319764 |
| KRT18      | 0.319419 |
| RNF39      | 0.319359 |
| AL645608.7 | 0.319202 |
| ITGA2      | 0.319135 |
| H2AC6      | 0.319133 |
| AC068299.1 | 0.319121 |
| SNTA1      | 0.318531 |
| RPS24P19   | 0.318503 |
| SPOCD1     | 0.318307 |
| SLC35F2    | 0.31822  |
| RETN       | 0.318151 |
| HSPA12A    | 0.31803  |
| MTARC1     | 0.317924 |
| LINC01137  | 0.317846 |
| OSGIN1     | 0.31774  |
| TMEM92     | 0.316054 |
| KRT19      | 0.314412 |
| HORMAD1    | 0.313494 |
| S100A14    | 0.313382 |
| AL590666.2 | 0.313382 |
| ARHGEF35   | 0.312531 |
| MEX3A      | 0.312327 |
| ST3GAL4    | 0.312023 |
| AKR1C2     | 0.311296 |
| FBXO17     | 0.31081  |
| TMEM158    | 0.310711 |
| EFNA3      | 0.309912 |
| AC010643.1 | 0.309807 |
| TPBG       | 0.309258 |
| LRRC4B     | 0.309206 |
| MFAP3L     | 0.309045 |
| CSPG5      | 0.308764 |
| CHIAP2     | 0.308667 |
| AL591178.1 | 0.308473 |
| B4GALNT1   | 0.30839  |
| S100A10    | 0.307715 |
| CPAMD8     | 0.307569 |
| AL450405.1 | 0.307276 |
| TMPRSS6    | 0.307047 |

|            |          |
|------------|----------|
| RPL41P2    | 0.306717 |
| MXRA7P1    | 0.306279 |
| FERMT1     | 0.306012 |
| PHLDA2     | 0.305479 |
| RGS4       | 0.304578 |
| LINC01503  | 0.304266 |
| TM4SF1-AS1 | 0.304111 |
| LINC01607  | 0.304004 |
| FSTL1      | 0.303809 |
| EDN1       | 0.303727 |
| HCG4       | 0.303535 |
| MEIS3P1    | 0.303513 |
| DCST2      | 0.303416 |
| FHL2       | 0.303004 |
| G6PD       | 0.302584 |
| H2AW       | 0.30241  |
| PF4        | 0.302094 |
| AC105290.1 | 0.301955 |
| E2F7       | 0.301912 |
| MESP1      | 0.301597 |
| DIO2       | 0.30073  |
| HSPB1P1    | 0.299416 |
| TIMP2      | 0.298727 |
| GFPT2      | 0.298191 |
| BMP1       | 0.298191 |
| PRDM16-DT  | 0.297707 |
| HYAL3      | 0.297666 |
| TUBA4A     | 0.297215 |
| CCND3      | 0.296771 |
| PDLIM4     | 0.29673  |
| EDN2       | 0.296691 |
| PPP1R13L   | 0.296439 |
| GREM1      | 0.296367 |
| KCNQ4      | 0.296335 |
| ASPG       | 0.296273 |
| CST6       | 0.29562  |
| SLC2A3     | 0.295426 |
| KRT8P3     | 0.295345 |
| SMOX       | 0.295182 |
| LINC01139  | 0.295176 |
| SERINC2    | 0.294791 |
| RN7SKP97   | 0.294443 |
| SIK1B      | 0.294417 |
| NPAS3      | 0.294175 |
| SPP1       | 0.293898 |
| CASC9      | 0.293548 |
| MARVELD1   | 0.29341  |
| MISP       | 0.293273 |
| AP001505.1 | 0.293272 |

|            |          |
|------------|----------|
| LINC02122  | 0.293032 |
| MMP14      | 0.29299  |
| TMEM200B   | 0.292974 |
| ACKR2      | 0.292777 |
| PIR        | 0.292718 |
| SLC7A4     | 0.29245  |
| PXN        | 0.292119 |
| CXCL8      | 0.291854 |
| TRIP6      | 0.291847 |
| TM4SF5     | 0.291557 |
| AL355032.1 | 0.29141  |
| ZNF114     | 0.291328 |
| NANOS1     | 0.291311 |
| FGF9       | 0.291234 |
| THEM5      | 0.291203 |
| POLR3H     | 0.290869 |
| DIO1       | 0.290748 |
| FOXA2      | 0.290656 |
| WNT5A      | 0.290465 |
| EPHB4      | 0.289932 |
| AGRN       | 0.289488 |
| THBS1      | 0.289348 |
| MGST1      | 0.289336 |
| PKP1       | 0.289227 |
| TMEM54     | 0.288931 |
| CLDN18     | 0.288861 |
| OLFML2A    | 0.28867  |
| FKBP4      | 0.288514 |
| SNCG       | 0.288474 |
| COL4A2     | 0.288443 |
| EPHX4      | 0.288375 |
| RND3       | 0.288224 |
| PAGE2B     | 0.288163 |
| NOX1       | 0.287662 |
| B3GNT3     | 0.287546 |
| PKM        | 0.28744  |
| NQO1       | 0.287417 |
| MIR1915HG  | 0.287146 |
| BCHE       | 0.286824 |
| PNMA8A     | 0.286819 |
| AC015922.2 | 0.286593 |
| MEG3       | 0.286509 |
| EPN3       | 0.286189 |
| TLCD2      | 0.28595  |
| CLTB       | 0.285788 |
| C6orf132   | 0.285669 |
| CMAS       | 0.285585 |
| INHBA      | 0.28514  |
| AL603825.1 | 0.285002 |

|            |          |
|------------|----------|
| NDRG1      | 0.284473 |
| HHIPL1     | 0.284267 |
| GPC5       | 0.283943 |
| TRIM54     | 0.283645 |
| LINC02298  | 0.283584 |
| HSP90AB2P  | 0.283453 |
| PLOD1      | 0.283025 |
| GPR39      | 0.282947 |
| DNMT3B     | 0.282773 |
| SLC44A3    | 0.282748 |
| PDLIM7     | 0.282708 |
| TSPAN7     | 0.282659 |
| ZNF503-AS1 | 0.282586 |
| SLC35C1    | 0.281693 |
| H1-12P     | 0.281683 |
| KRAS       | 0.281142 |
| TRO        | 0.280789 |
| CTPS1      | 0.28075  |
| AC025575.2 | 0.280634 |
| NPAS2      | 0.280431 |
| PRR11      | 0.28019  |
| LRRC26     | 0.280028 |
| SERPINA5   | 0.279623 |
| RNF212     | 0.279212 |
| KIF7       | 0.279025 |
| AF201337.1 | 0.278962 |
| EPHX1      | 0.278932 |
| SPRY4      | 0.278904 |
| SOWAHC     | 0.27874  |
| GBE1       | 0.27852  |
| NAMPT      | 0.278374 |
| ASPHD1     | 0.278145 |
| CDH13      | 0.278014 |
| SYDE1      | 0.277693 |
| NPR3       | 0.277693 |
| EFHD1      | 0.277504 |
| BCAR1      | 0.277462 |
| COL5A1     | 0.277447 |
| TNFSF9     | 0.277007 |
| EFNB2      | 0.276932 |
| USP43      | 0.276764 |
| DLGAP1-AS2 | 0.276743 |
| PLA2G10    | 0.276551 |
| PAQR5      | 0.276429 |
| RGMA       | 0.276428 |
| TMEM40     | 0.275802 |
| C1QTNF6    | 0.275756 |
| GRB10      | 0.275726 |
| HSPA1B     | 0.275621 |

|            |          |
|------------|----------|
| SHC1       | 0.275469 |
| TEAD4      | 0.275305 |
| RPL7AP30   | 0.274611 |
| COL5A2     | 0.27435  |
| BMP4       | 0.274319 |
| AC018816.1 | 0.274258 |
| B4GALT2    | 0.27424  |
| PRKAR1B    | 0.274214 |
| ULBP3      | 0.274097 |
| CDH15      | 0.274032 |
| PKIB       | 0.273853 |
| SPINT1     | 0.273675 |
| NKX3-1     | 0.273376 |
| GIN54      | 0.273205 |
| LOXL1-AS1  | 0.272453 |
| FXVD3      | 0.272375 |
| LRP8       | 0.272287 |
| AC025062.1 | 0.272167 |
| IFITM10    | 0.272092 |
| SP8        | 0.272043 |
| HLA-V      | 0.271768 |
| ZNF677     | 0.271734 |
| SP6        | 0.271527 |
| KLC3       | 0.27125  |
| AK4        | 0.270998 |
| GPR176     | 0.270954 |
| EFNB1      | 0.270753 |
| LIPH       | 0.27064  |
| AC018475.1 | 0.270504 |
| FOXQ1      | 0.270428 |
| ATP6V1C2   | 0.27021  |
| PLIN3      | 0.269851 |
| HLA-G      | 0.269696 |
| TEAD3      | 0.269637 |
| AC093673.1 | 0.269116 |
| PTPRH      | 0.269032 |
| SLC51B     | 0.268995 |
| ANXA2P2    | 0.268881 |
| AP002761.4 | 0.268686 |
| MIR9-3HG   | 0.268508 |
| CPXM2      | 0.268487 |
| RRAS2      | 0.268238 |
| ANKRD34B   | 0.268223 |
| AL445524.1 | 0.268167 |
| CHCHD2P2   | 0.268164 |
| HHLA2      | 0.26779  |
| TPI1P1     | 0.267732 |
| GPRC5C     | 0.267693 |
| MAGEC2     | 0.267348 |

|            |          |
|------------|----------|
| EXO1       | 0.26721  |
| MCEMP1     | 0.267132 |
| OLA1P1     | 0.266977 |
| PTGER1     | 0.266942 |
| GABRA3     | 0.266906 |
| AC096536.2 | 0.266751 |
| RN7SL368P  | 0.266612 |
| PFKP       | 0.266472 |
| CCT6A      | 0.266188 |
| GSTO2      | 0.265687 |
| FOXL1      | 0.265605 |
| PLAAT1     | 0.265317 |
| CKMT1B     | 0.265307 |
| WFDC1      | 0.264897 |
| KIF2C      | 0.26483  |
| FAM83G     | 0.264633 |
| LINC00857  | 0.264491 |
| AL390719.1 | 0.264455 |
| AC010547.2 | 0.264336 |
| AC105020.1 | 0.264185 |
| FKBP9P1    | 0.264153 |
| ORC1       | 0.264068 |
| COL6A1     | 0.263463 |
| FBXL16     | 0.263324 |
| RAP1GAP    | 0.262877 |
| PCDHGB5    | 0.262842 |
| MYOF       | 0.262756 |
| RANBP1P1   | 0.262685 |
| COL4A1     | 0.262241 |
| AUNIP      | 0.261726 |
| BX640514.2 | 0.261591 |
| GUCY2C     | 0.261438 |
| AF064858.1 | 0.261431 |
| SNAI1      | 0.261026 |
| POF1B      | 0.260959 |
| COL15A1    | 0.260814 |
| TSPAN1     | 0.260708 |
| PSMG3-AS1  | 0.260616 |
| DLX3       | 0.26032  |
| ZNF385B    | 0.260061 |
| PTGS2      | 0.260019 |
| GPR153     | 0.259878 |
| AHNAK2     | 0.25961  |
| BCL9L      | 0.259311 |
| AC104695.2 | 0.259192 |
| ANXA1      | 0.258941 |
| GCNT3      | 0.258883 |
| DLK2       | 0.258874 |
| RPL14P1    | 0.258041 |

|            |          |
|------------|----------|
| AC108451.2 | 0.257972 |
| SOX9       | 0.257482 |
| FABP3      | 0.257463 |
| RPP40      | 0.257452 |
| STAC2      | 0.257309 |
| COL5A3     | 0.257301 |
| STAC       | 0.256999 |
| CERCAM     | 0.256956 |
| FBXL18     | 0.256935 |
| FHOD3      | 0.256919 |
| OMD        | 0.256897 |
| MECOM-AS1  | 0.256667 |
| MUC15      | 0.255858 |
| SPHK1      | 0.255768 |
| ADAMTSL4   | 0.255662 |
| MIR210     | 0.255537 |
| TPX2       | 0.255353 |
| CBX2       | 0.255322 |
| AC079922.1 | 0.25526  |
| IL1RAP     | 0.255018 |
| ANTXR1     | 0.254863 |
| TIMP3      | 0.254789 |
| TFAP2E     | 0.25474  |
| AR         | 0.254667 |
| TMEM52     | 0.254607 |
| FGF1       | 0.254154 |
| TUFT1      | 0.254029 |
| GAPDHP65   | 0.253979 |
| RPL13AP20  | 0.253815 |
| ACTBP12    | 0.253759 |
| WDR72      | 0.253407 |
| LGALS4     | 0.253361 |
| AL136126.1 | 0.253298 |
| AC073861.1 | 0.253289 |
| JAG1       | 0.253199 |
| TBX1       | 0.252961 |
| AC246787.1 | 0.252549 |
| SHISAL1    | 0.252544 |
| SMURF1     | 0.252495 |
| PRSS22     | 0.252185 |
| TDP2       | 0.252165 |
| TMEM139    | 0.251969 |
| ADGRD1     | 0.251803 |
| RHOC       | 0.251527 |
| FOSL2      | 0.251512 |
| AC010998.3 | 0.251431 |
| ADRA1B     | 0.251237 |
| MTX1P1     | 0.251126 |
| PYGL       | 0.251061 |



|            |          |
|------------|----------|
| CALU       | 0.250959 |
| AL355312.3 | 0.250796 |
| FGFRL1     | 0.250602 |
| VCL        | 0.250572 |
| ITGA3      | 0.250514 |
| INF2       | 0.250236 |
| C1QL3      | 0.250217 |
| GAPDH      | 0.250049 |
| GABRD      | 0.250032 |
| SLC2A10    | 0.25001  |
| OTX1       | 0.249879 |
| DDIT4      | 0.249379 |
| BMERB1     | 0.249289 |
| RPL37AP1   | 0.249272 |
| CD300E     | 0.249237 |
| COL1A2     | 0.24903  |
| SEMA3F     | 0.248965 |
| TNFAIP6    | 0.248325 |
| SYT12      | 0.247943 |
| TUBA1C     | 0.247917 |
| PLEC       | 0.247744 |
| OLFM2      | 0.247719 |
| AC099850.3 | 0.247693 |
| DUSP9      | 0.247625 |
| AL109936.2 | 0.247536 |
| COL1A1     | 0.247179 |
| LAMA5      | 0.247105 |
| GDPD3      | 0.246929 |
| BMS1P10    | 0.246778 |
| HKDC1      | 0.246684 |
| MYO1C      | 0.246674 |
| PEX6       | 0.246431 |
| GALNT2     | 0.246315 |
| CHP1       | 0.245935 |
| AC044787.1 | 0.245872 |
| AC068580.4 | 0.245686 |
| ASIC1      | 0.245604 |
| PGM2       | 0.245528 |
| TMEM171    | 0.245267 |
| TAX1BP3    | 0.24513  |
| SPINT1-AS1 | 0.245    |
| DVL1       | 0.244759 |
| FOLR1      | 0.244689 |
| SEC14L4    | 0.244636 |
| CDKN1C     | 0.244586 |
| SLC4A3     | 0.244495 |
| GAL3ST1    | 0.244446 |
| DLX5       | 0.24443  |
| BRINP1     | 0.244424 |

|            |          |
|------------|----------|
| FBXO27     | 0.244292 |
| MAB21L4    | 0.244256 |
| RPL26P30   | 0.244106 |
| NLRP2      | 0.243915 |
| RPS3AP5    | 0.2438   |
| UCN        | 0.243704 |
| STEAP1B    | 0.243651 |
| IRX3       | 0.243519 |
| AC008556.1 | 0.243248 |
| HOXC10     | 0.243159 |
| AC078925.4 | 0.242936 |
| AMIGO2     | 0.242294 |
| HSPA2      | 0.242289 |
| ADAMTS5    | 0.242066 |
| C1QTNF12   | 0.241862 |
| CXADR      | 0.2417   |
| IGSF21     | 0.241425 |
| KRTCAP3    | 0.241345 |
| ARSI       | 0.241101 |
| TSPAN13    | 0.240778 |
| AC005993.1 | 0.240669 |
| AL139288.1 | 0.240476 |
| CYBRD1     | 0.24005  |
| TALDO1     | 0.240014 |
| LINC00960  | 0.239916 |
| GSR        | 0.239625 |
| NSMF       | 0.23962  |
| SKP2       | 0.23954  |
| TTLL12     | 0.239517 |
| MEAK7      | 0.239444 |
| PERP       | 0.239318 |
| AC009065.5 | 0.239259 |
| PMF1-BGLAP | 0.238995 |
| SETP14     | 0.238895 |
| PACSIN3    | 0.238697 |
| TM4SF1     | 0.238622 |
| AC023024.2 | 0.23802  |
| MMP15      | 0.237936 |
| MUC20      | 0.237897 |
| GPRC5A     | 0.237877 |
| GPR37      | 0.237836 |
| OGN        | 0.237361 |
| MBOAT7     | 0.237176 |
| COL8A1     | 0.237023 |
| CD151      | 0.236994 |
| SIX5       | 0.236934 |
| RPL10AP6   | 0.236918 |
| TNFRSF1A   | 0.236869 |
| TJP1       | 0.236809 |

|            |          |
|------------|----------|
| MAOA       | 0.236609 |
| HACD1      | 0.236583 |
| SLC22A17   | 0.236311 |
| RPL7P47    | 0.236239 |
| SPINK1     | 0.235441 |
| UPK3A      | 0.235419 |
| TCEAL7     | 0.235358 |
| SPECC1     | 0.235319 |
| TENM3      | 0.235291 |
| KRT8       | 0.235276 |
| MFSD12     | 0.234944 |
| KDELR3     | 0.234826 |
| NCS1       | 0.234631 |
| RTN4RL1    | 0.234504 |
| DAG1       | 0.234186 |
| FLNB       | 0.234075 |
| CCT5       | 0.233862 |
| PTPRF      | 0.233743 |
| NT5DC2     | 0.233719 |
| CAPZA2     | 0.233634 |
| LRRC8A     | 0.23359  |
| SEMA3B-AS1 | 0.23357  |
| ZNF467     | 0.233454 |
| TUBB       | 0.23315  |
| PGM1       | 0.233138 |
| SFN        | 0.233116 |
| BAG2       | 0.233111 |
| IMPDH1     | 0.233091 |
| TMEM217    | 0.233064 |
| PARD3      | 0.232902 |
| NFE2       | 0.232866 |
| PTTG1IP    | 0.232845 |
| DRGX       | 0.23278  |
| MEIS3P2    | 0.232411 |
| AC107959.3 | 0.232102 |
| EHD2       | 0.23175  |
| AC079250.1 | 0.231641 |
| RPL6P27    | 0.231624 |
| MAP3K4-AS1 | 0.231567 |
| NECTIN1    | 0.231328 |
| ANXA3      | 0.231325 |
| AC024293.1 | 0.231312 |
| EIF5AL1    | 0.231298 |
| MT1X       | 0.231282 |
| ITGB5      | 0.231251 |
| PODXL2     | 0.231241 |
| LTBP1      | 0.231029 |
| C10orf55   | 0.230951 |
| BAIAP2     | 0.230856 |

|              |          |
|--------------|----------|
| GSDME        | 0.230854 |
| ATP8B3       | 0.230765 |
| RPS14P8      | 0.230683 |
| GALNT12      | 0.230622 |
| HOXC6        | 0.230219 |
| HPCAL1       | 0.230195 |
| NUMBL        | 0.230174 |
| GAMT         | 0.230113 |
| PTPRS        | 0.229984 |
| PPP1R14B-AS1 | 0.229931 |
| PMEL         | 0.229288 |
| KIRREL1      | 0.229189 |
| PPDPF        | 0.228937 |
| ADAMTS2      | 0.228936 |
| TNFRSF10D    | 0.228934 |
| CSGALNACT1   | 0.228614 |
| VILL         | 0.228551 |
| COBL         | 0.2285   |
| NAB2         | 0.228424 |
| TRIM31-AS1   | 0.228319 |
| PROSER2      | 0.228112 |
| CHSY3        | 0.228027 |
| C15orf48     | 0.228023 |
| VDAC2P5      | 0.228008 |
| ACOT11       | 0.227728 |
| PPL          | 0.227693 |
| MLXIPL       | 0.227689 |
| KIAA1522     | 0.227564 |
| PRKCZ        | 0.227471 |
| TOB2P1       | 0.22747  |
| NIBAN2       | 0.227397 |
| SLC35B2      | 0.227303 |
| RORC         | 0.227134 |
| RTN4R        | 0.227037 |
| LAMC3        | 0.226872 |
| ATP6V1B1     | 0.226838 |
| KIFC1        | 0.226823 |
| AC092118.1   | 0.226804 |
| DUSP7        | 0.226141 |
| TSC22D2      | 0.226013 |
| EHHADH       | 0.226    |
| BVES         | 0.225979 |
| VPS37D       | 0.225853 |
| AC002467.1   | 0.225721 |
| AC130371.2   | 0.225615 |
| SERPINH1     | 0.225524 |
| LLGL1        | 0.225511 |
| TOR4A        | 0.225203 |
| ADGRD1-AS1   | 0.225106 |

|            |          |
|------------|----------|
| CD276      | 0.224833 |
| KRT87P     | 0.224822 |
| OIP5       | 0.224803 |
| HOXC8      | 0.224445 |
| ADAMTS12   | 0.224438 |
| PPP1R3G    | 0.22439  |
| MALINC1    | 0.224233 |
| DSG2       | 0.224208 |
| NPM1P27    | 0.224118 |
| ARL4D      | 0.224117 |
| PLEKHN1    | 0.224103 |
| IQGAP3     | 0.224087 |
| AL109761.1 | 0.223987 |
| DNAJB4     | 0.223854 |
| LINC02814  | 0.223441 |
| MXRA5      | 0.222726 |
| ALDOA      | 0.222607 |
| ADGRL2     | 0.222485 |
| NTF4       | 0.22241  |
| ERVH48-1   | 0.222315 |
| RPS7P10    | 0.222215 |
| AC027763.2 | 0.222153 |
| TMCC3      | 0.222041 |
| LDHD       | 0.221954 |
| MKX        | 0.221869 |
| LINC02555  | 0.221865 |
| LINC02762  | 0.221614 |
| SPRED3     | 0.221486 |
| GRP        | 0.22141  |
| GAS1       | 0.221234 |
| LMNA       | 0.221117 |
| C17orf107  | 0.221005 |
| LAMC1      | 0.220963 |
| LRRN4      | 0.220851 |
| MRPS24     | 0.220795 |
| COPS6      | 0.220792 |
| SH2D3A     | 0.220413 |
| P4HA1      | 0.22011  |
| PRRT3-AS1  | 0.219685 |
| KCNMB4     | 0.219622 |
| VARA1      | 0.219581 |
| FGFR1      | 0.21943  |
| AC125807.2 | 0.219426 |
| BZW2       | 0.219364 |
| DSCAM-AS1  | 0.219302 |
| SPARC      | 0.219257 |
| LTBR       | 0.219049 |
| HRH1       | 0.218878 |
| LINC02253  | 0.21884  |

|            |          |
|------------|----------|
| SEMA4G     | 0.218503 |
| SLC9A2     | 0.218309 |
| C1orf226   | 0.218075 |
| GYG2       | 0.21803  |
| EHBP1      | 0.217997 |
| ABHD11-AS1 | 0.21739  |
| CAVIN1     | 0.217216 |
| CARD14     | 0.217105 |
| ABCC1      | 0.217073 |
| RNF24      | 0.21695  |
| H1-2       | 0.21694  |
| FANCE      | 0.21675  |
| DCXR       | 0.216722 |
| TM2D2      | 0.216714 |
| SKA3       | 0.2167   |
| ANXA2      | 0.216635 |
| TMEM38A    | 0.21657  |
| ETNPPL     | 0.215993 |
| ARHGAP11A  | 0.215955 |
| EPS8L1     | 0.215856 |
| NME4       | 0.215788 |
| CLDN9      | 0.215757 |
| MYC        | 0.215641 |
| RPS24P8    | 0.215556 |
| USH1C      | 0.215239 |
| PHETA1     | 0.215077 |
| LINC01842  | 0.215042 |
| POLR1G     | 0.215032 |
| FTH1P2     | 0.214978 |
| ABCC3      | 0.214967 |
| PC         | 0.214962 |
| FAM114A1   | 0.214744 |
| CCL7       | 0.214546 |
| ACTN1      | 0.21437  |
| ENTPD2     | 0.214326 |
| DBN1       | 0.214132 |
| SEMA4B     | 0.213917 |
| AP2M1      | 0.213372 |
| ADGRB2     | 0.213315 |
| FOXM1      | 0.213254 |
| RAB23      | 0.213208 |
| SAMD13     | 0.213107 |
| RPL18AP3   | 0.212998 |
| P4HA2      | 0.212924 |
| ANGPT2     | 0.212904 |
| LINC02864  | 0.212893 |
| AC116533.1 | 0.212834 |
| AL353693.1 | 0.212822 |
| PRXL2B     | 0.212699 |

|            |          |
|------------|----------|
| FAM81A     | 0.212682 |
| SNX33      | 0.212601 |
| ZNF667-AS1 | 0.212585 |
| DAAM2      | 0.212222 |
| MROH6      | 0.212092 |
| AC136475.3 | 0.212089 |
| ATG9B      | 0.212059 |
| PDGFB      | 0.212028 |
| MUC3A      | 0.212016 |
| SCRN1      | 0.211879 |
| COMP       | 0.211799 |
| H2BC5      | 0.211798 |
| NDUFA4P1   | 0.211673 |
| PPP1R14B   | 0.210707 |
| CCBE1      | 0.210338 |
| PPARG      | 0.210277 |
| TRPM2-AS   | 0.21025  |
| SYCE3      | 0.210073 |
| ZNF280B    | 0.209784 |
| SLC35E4    | 0.209694 |
| AL080243.1 | 0.20939  |
| ZNF469     | 0.209357 |
| AC011495.1 | 0.209279 |
| AMOTL1     | 0.2092   |
| AC034236.1 | 0.209121 |
| SUMO2P21   | 0.208892 |
| GRIP1      | 0.208556 |
| MCM7       | 0.208322 |
| TKT        | 0.208055 |
| TUBB3      | 0.207999 |
| CCDC3      | 0.207951 |
| ARHGAP23   | 0.207837 |
| CDC20      | 0.207824 |
| PODXL      | 0.207823 |
| AC107294.2 | 0.207711 |
| EEF1A1P13  | 0.20757  |
| ATP6V0A4   | 0.20749  |
| TPD52L1    | 0.207232 |
| TMEM63B    | 0.207178 |
| TAGLN      | 0.20709  |
| PIP        | 0.206763 |
| RCN3       | 0.206591 |
| EXTL2      | 0.206353 |
| HIBADH     | 0.206334 |
| PPIAP31    | 0.206277 |
| AL122020.1 | 0.206189 |
| AC245100.5 | 0.206159 |
| RPSAP54    | 0.206152 |
| TPM2       | 0.206111 |

|            |          |
|------------|----------|
| HOXC13     | 0.206083 |
| BACE2      | 0.206011 |
| BYSL       | 0.205989 |
| NEDD4      | 0.205521 |
| S100A3     | 0.205517 |
| C1orf53    | 0.205411 |
| EFNB3      | 0.205385 |
| MXD1       | 0.205284 |
| CYCSP6     | 0.205281 |
| HMGN1P36   | 0.205194 |
| GIPC3      | 0.204838 |
| MT1E       | 0.204492 |
| GJC2       | 0.204332 |
| PAQR7      | 0.204313 |
| Z74021.1   | 0.204147 |
| TTK        | 0.20385  |
| DDR1       | 0.203765 |
| UBE2E4P    | 0.203758 |
| TNK1       | 0.203753 |
| COL18A1    | 0.20375  |
| RDX        | 0.203478 |
| MPP2       | 0.203371 |
| RAB11FIP5  | 0.203356 |
| PPARD      | 0.203286 |
| RRM2       | 0.203234 |
| SUSD5      | 0.20316  |
| YIPF3      | 0.203149 |
| ARPC1B     | 0.203072 |
| AC073316.2 | 0.202727 |
| PKIA       | 0.202608 |
| AC090515.4 | 0.202536 |
| LAMB1      | 0.202391 |
| RPS2P7     | 0.20233  |
| SHMT1      | 0.202309 |
| CA9        | 0.202211 |
| AC009275.1 | 0.20213  |
| TMEM92-AS1 | 0.202103 |
| RPS10P3    | 0.201858 |
| RBBP8NL    | 0.201809 |
| FO393411.1 | 0.201778 |
| DEPDC1     | 0.201769 |
| JPT2       | 0.201604 |
| AP000769.1 | 0.201407 |
| NUP155     | 0.201341 |
| RPL23P8    | 0.201262 |
| FURIN      | 0.201208 |
| AC015922.3 | 0.200842 |
| RPS18P12   | 0.200819 |
| VEGFA      | 0.200811 |



|            |          |
|------------|----------|
| TOB1       | 0.200759 |
| DSC2       | 0.20068  |
| RNF186     | 0.200502 |
| WIPF3      | 0.200118 |
| BFSP1      | 0.200036 |
| S100A4     | 0.200023 |
| SECISBP2L  | 0.199945 |
| AKR1B1     | 0.199923 |
| RPL15P3    | 0.199847 |
| DRD4       | 0.199786 |
| YJEFN3     | 0.199722 |
| NES        | 0.199426 |
| AL023284.4 | 0.198927 |
| AP1S1      | 0.198878 |
| ZBTB12     | 0.198794 |
| LRRC1      | 0.198227 |
| LINC02688  | 0.19821  |
| KLK8       | 0.198187 |
| MBOAT2     | 0.198113 |
| NPNT       | 0.197792 |
| SCEL       | 0.197781 |
| RPL7AP6    | 0.197775 |
| MST1R      | 0.197688 |
| HAL        | 0.197605 |
| POLD2      | 0.197485 |
| PTHLH      | 0.197392 |
| GAS2L1     | 0.197253 |
| GRAMD2A    | 0.197205 |
| NCAM1      | 0.196894 |
| MIR6835    | 0.196758 |
| DNTTIP1    | 0.196657 |
| PORCN      | 0.196589 |
| AL139095.2 | 0.196545 |
| HSPG2      | 0.196482 |
| ALKAL1     | 0.196473 |
| TPD52L2    | 0.196461 |
| TYRO3      | 0.196448 |
| BX322562.1 | 0.196356 |
| RNU6-26P   | 0.196328 |
| CYP3A5     | 0.196144 |
| HMG2P41    | 0.195921 |
| KDELR2     | 0.195877 |
| HCFC1R1    | 0.195867 |
| SUSD2      | 0.195867 |
| PDZK1IP1   | 0.195759 |
| SMO        | 0.195754 |
| NAGS       | 0.195591 |
| SLC9A3R2   | 0.195567 |
| PRDX1      | 0.19556  |

|            |          |
|------------|----------|
| KIF23      | 0.195539 |
| AC016596.2 | 0.195532 |
| MOSPD3     | 0.195512 |
| EFNA4      | 0.195494 |
| TNNI1      | 0.195488 |
| ABTB2      | 0.195219 |
| EIF3B      | 0.194905 |
| MXRA8      | 0.194902 |
| AXL        | 0.194771 |
| OSR2       | 0.194746 |
| HFE        | 0.19473  |
| ALDH3B1    | 0.194322 |
| AVEN       | 0.194319 |
| PLEKHA6    | 0.194278 |
| INTS1      | 0.194191 |
| MEPCE      | 0.194092 |
| SEMA3D     | 0.194057 |
| AC006206.2 | 0.193772 |
| HES4       | 0.193734 |
| RPL4P5     | 0.193538 |
| BX322234.1 | 0.193468 |
| AC008026.1 | 0.19316  |
| TCEA3      | 0.193117 |
| DUSP5      | 0.193003 |
| GCAT       | 0.192918 |
| B4GALNT2   | 0.192869 |
| TXN        | 0.192794 |
| AL590652.1 | 0.192601 |
| HIC2       | 0.192493 |
| TACSTD2    | 0.192486 |
| KIF1C      | 0.192433 |
| AC023421.1 | 0.192393 |
| SMAGP      | 0.192387 |
| TICRR      | 0.192215 |
| CXCL3      | 0.192053 |
| HBB        | 0.191965 |
| MXRA7      | 0.191523 |
| RPL7P9     | 0.191381 |
| KNSTRN     | 0.191272 |
| AC026471.3 | 0.191198 |
| AL391427.1 | 0.191179 |
| GATA2-AS1  | 0.191157 |
| AC133528.1 | 0.191145 |
| HSP90AB1   | 0.191121 |
| CLDN1      | 0.19096  |
| LINC01018  | 0.190914 |
| OAF        | 0.190847 |
| CDH2       | 0.19083  |
| KLHL21     | 0.190817 |

|            |          |
|------------|----------|
| ID4        | 0.190751 |
| GAPDHP35   | 0.190549 |
| KRT8P11    | 0.190518 |
| CHRNA1     | 0.190489 |
| HSPB7      | 0.190471 |
| PDAP1      | 0.190315 |
| LINC00942  | 0.190235 |
| SORD       | 0.190226 |
| MAP3K20    | 0.190202 |
| SMIM1      | 0.190147 |
| LY6D       | 0.190057 |
| SMTN       | 0.189949 |
| PSMD2      | 0.189927 |
| ANKRD9     | 0.189868 |
| TBC1D2     | 0.189764 |
| RPL23AP49  | 0.1896   |
| PERM1      | 0.189275 |
| HMG1P37    | 0.189067 |
| TMED3      | 0.189033 |
| PALM3      | 0.189033 |
| DAP        | 0.189016 |
| HYAL1      | 0.188983 |
| SAMD11     | 0.188616 |
| SPR        | 0.188586 |
| C16orf89   | 0.188577 |
| FOXC1      | 0.188492 |
| FGFBP1     | 0.18844  |
| TMEM35A    | 0.188399 |
| OSBP2      | 0.188308 |
| CCDC85C    | 0.188232 |
| SRD5A3     | 0.188058 |
| CHEK1      | 0.188037 |
| SMIM6      | 0.188006 |
| ENTPD8     | 0.188001 |
| AC138392.1 | 0.187761 |
| PPP1R14BP3 | 0.187655 |
| RPL17P50   | 0.18764  |
| UNC5B      | 0.187524 |
| AP1S3      | 0.187512 |
| RPS3AP21   | 0.187307 |
| FAM20C     | 0.187179 |
| TOMM40P4   | 0.187153 |
| AL391056.1 | 0.187123 |
| CDCA4      | 0.187095 |
| TMBIM1     | 0.186773 |
| MPZL2      | 0.186772 |
| PDGFC      | 0.186613 |
| LDHA       | 0.186442 |
| ZNF713     | 0.186383 |

|            |          |
|------------|----------|
| RASSF7     | 0.186273 |
| AC079140.2 | 0.186165 |
| EIF4G1     | 0.18602  |
| KPNA7      | 0.185768 |
| ETFRF1     | 0.185634 |
| ZNF880     | 0.185582 |
| NYNRIN     | 0.185322 |
| KIAA1549   | 0.184856 |
| PRSS23     | 0.18481  |
| RAB25      | 0.184785 |
| AC093627.4 | 0.184738 |
| EIF4BP6    | 0.184728 |
| ZNF311     | 0.184469 |
| ELOVL4     | 0.184455 |
| LRRC42     | 0.184377 |
| POP7       | 0.184356 |
| UFSP1      | 0.183975 |
| CPXM1      | 0.183701 |
| VASN       | 0.183664 |
| ATP5MC1P4  | 0.183652 |
| PRECSIT    | 0.183524 |
| ACTN4      | 0.183432 |
| PALLD      | 0.183244 |
| LRFN1      | 0.18319  |
| SLC52A3    | 0.183172 |
| GNB2       | 0.183172 |
| APBA2      | 0.183171 |
| PKP3       | 0.183028 |
| SLC45A4    | 0.182781 |
| LGR4       | 0.182684 |
| MYO1G      | 0.182671 |
| PRICKLE1   | 0.182576 |
| AEBP1      | 0.18246  |
| PAICS      | 0.182448 |
| CDC42EP2   | 0.182184 |
| TMEM41A    | 0.18214  |
| RPL35P1    | 0.182121 |
| ARHGEF16   | 0.181887 |
| APBB2      | 0.181886 |
| PDE4D      | 0.181785 |
| AC010343.1 | 0.181759 |
| AC135178.6 | 0.181726 |
| ZFPM2      | 0.181681 |
| AL512329.2 | 0.181535 |
| SPTBN2     | 0.181383 |
| AGTRAP     | 0.18121  |
| GPAT2      | 0.181148 |
| LPAR1      | 0.181117 |
| AC144831.1 | 0.181084 |

|            |          |
|------------|----------|
| ABHD17C    | 0.18098  |
| ATP5F1EP2  | 0.180801 |
| AL606489.1 | 0.18071  |
| YWHAG      | 0.180675 |
| VAV3       | 0.180673 |
| RPL13P12   | 0.180671 |
| NXN        | 0.180606 |
| PLBD1      | 0.180599 |
| ZBED9      | 0.180571 |
| P2RY2      | 0.180504 |
| TPI1       | 0.180449 |
| TSR1       | 0.180381 |
| TPM4       | 0.18038  |
| ACOT13     | 0.180375 |
| EBPL       | 0.18034  |
| GNMT       | 0.180324 |
| CHMP4C     | 0.180274 |
| IDH1       | 0.180147 |
| LINC02593  | 0.180119 |
| SUMF2      | 0.18011  |
| DHRS11     | 0.179936 |
| ID3        | 0.179785 |
| HSD17B2    | 0.179687 |
| FAM86JP    | 0.17967  |
| CKAP4      | 0.179665 |
| DDX10      | 0.179656 |
| AC012073.1 | 0.179575 |
| SNHG18     | 0.179499 |
| MUC20P1    | 0.179444 |
| COL6A2     | 0.179325 |
| MACIR      | 0.179216 |
| MKRN2OS    | 0.178982 |
| PTGES3P3   | 0.178814 |
| DENND2A    | 0.178752 |
| AL391001.1 | 0.178645 |
| SOSTDC1    | 0.178546 |
| PNKD       | 0.178539 |
| CLPSL2     | 0.178508 |
| RPL10AP2   | 0.178423 |
| AFAP1L2    | 0.178391 |
| TRIP10     | 0.178317 |
| SMAD3      | 0.178294 |
| STK38L     | 0.17808  |
| FTH1P11    | 0.177976 |
| PSORS1C1   | 0.177953 |
| EPHA10     | 0.177952 |
| ADAP1      | 0.177872 |
| AC000089.1 | 0.177832 |
| RASSF8     | 0.177722 |

|            |          |
|------------|----------|
| TMSB10P1   | 0.177686 |
| UCHL1      | 0.177483 |
| SLCO2A1    | 0.177339 |
| GOLT1B     | 0.177209 |
| RAB5IF     | 0.177158 |
| MIR4653    | 0.177101 |
| PCDH1      | 0.176839 |
| SHISA4     | 0.17679  |
| CPNE8-AS1  | 0.176725 |
| EEF1B2P3   | 0.176462 |
| ANXA9      | 0.176393 |
| RPS10P2    | 0.17638  |
| IKBIP      | 0.176328 |
| RAP1BL     | 0.176273 |
| SLC39A14   | 0.176204 |
| RAC1P2     | 0.176196 |
| PCOLCE     | 0.176034 |
| LINC02381  | 0.176013 |
| CDC6       | 0.176005 |
| BZW1       | 0.176001 |
| FAM110B    | 0.175879 |
| DPY19L1    | 0.17553  |
| KIF3C      | 0.175402 |
| CHPF       | 0.175147 |
| KRT7-AS    | 0.175077 |
| TWIST1     | 0.174999 |
| RPL24P4    | 0.17496  |
| IRS1       | 0.174899 |
| RAB31      | 0.174778 |
| MAP7       | 0.174693 |
| ITGB3      | 0.174626 |
| ACTG2      | 0.174559 |
| PCDHB4     | 0.174474 |
| AC147067.1 | 0.174471 |
| PVR        | 0.174444 |
| ABCB6      | 0.174323 |
| PLOD3      | 0.174322 |
| GLB1L3     | 0.17428  |
| HOXD9      | 0.173915 |
| PCDHAC1    | 0.173908 |
| TMOD3      | 0.173778 |
| ULK1       | 0.173725 |
| MT1M       | 0.173555 |
| YKT6       | 0.173504 |
| DMGDH      | 0.173494 |
| HES1       | 0.173355 |
| AP005233.2 | 0.173269 |
| ERLIN1     | 0.173141 |
| EPHA1      | 0.173111 |

|             |          |
|-------------|----------|
| ADAM17      | 0.173079 |
| DMBX1       | 0.172996 |
| SBSPON      | 0.172792 |
| SLC16A5     | 0.172699 |
| GATA2       | 0.172621 |
| PAFAH1B2    | 0.172617 |
| SPATC1L     | 0.172548 |
| AL365357.1  | 0.172381 |
| DACT1       | 0.172372 |
| EPN2        | 0.172324 |
| AC010503.4  | 0.172211 |
| AC006026.3  | 0.17217  |
| EIF4BP3     | 0.172015 |
| BAG1        | 0.171813 |
| RPS3AP6     | 0.171742 |
| SLC45A3     | 0.171716 |
| MECOM       | 0.171594 |
| N4BP3       | 0.171556 |
| CTTN        | 0.171515 |
| SEC14L2     | 0.171497 |
| PSORS1C3    | 0.171352 |
| BIK         | 0.171193 |
| INTS13      | 0.171173 |
| BUB1B       | 0.171045 |
| ADAMTS9     | 0.171022 |
| CDCA8       | 0.170938 |
| ADGRA3      | 0.17076  |
| ALG3        | 0.170652 |
| ALDH3A2     | 0.170571 |
| RPL7AP11    | 0.170534 |
| PENK        | 0.170447 |
| TMEM79      | 0.170368 |
| TMC7        | 0.170367 |
| ZNHIT6      | 0.170193 |
| CDK2AP1     | 0.170082 |
| NFKBIL1     | 0.170034 |
| PPM1J       | 0.169848 |
| SACS        | 0.169762 |
| AC112220.2  | 0.169678 |
| DNAAF5      | 0.169649 |
| NHLRC1      | 0.169502 |
| LINC02474   | 0.169327 |
| ADAM15      | 0.169308 |
| CHGB        | 0.169256 |
| FHL3        | 0.169094 |
| AC009065.2  | 0.168778 |
| AC110619.1  | 0.168717 |
| SLC12A9-AS1 | 0.16866  |
| ZNF229      | 0.16865  |

|            |          |
|------------|----------|
| CDC45      | 0.168565 |
| TPRG1-AS1  | 0.168555 |
| SUMO3      | 0.168445 |
| STYK1      | 0.168416 |
| COL3A1     | 0.168336 |
| LGI3       | 0.168333 |
| LY6H       | 0.168266 |
| GPX2       | 0.168238 |
| MRPS35     | 0.168221 |
| ARHGEF5    | 0.16808  |
| RNF26      | 0.168041 |
| P3H3       | 0.167961 |
| GPRIN1     | 0.167956 |
| PTGS1      | 0.16785  |
| JPT1       | 0.167762 |
| IMMP2L     | 0.167747 |
| AL158166.1 | 0.167652 |
| DSTN       | 0.167636 |
| NIPSNAP1   | 0.167583 |
| FRRS1      | 0.167572 |
| H3P47      | 0.167545 |
| AP4M1      | 0.167492 |
| FZD1       | 0.167475 |
| ATAD3C     | 0.167362 |
| PRC1       | 0.167339 |
| TINAG      | 0.167243 |
| RPS2P5     | 0.167137 |
| RPLP0P6    | 0.167075 |
| ZNF217     | 0.166954 |
| UBE2H      | 0.166872 |
| CLSPN      | 0.166822 |
| SDC4       | 0.166742 |
| KLF5       | 0.166634 |
| RPL39L     | 0.166568 |
| C1orf122   | 0.166551 |
| FAM177B    | 0.166531 |
| ACTG1      | 0.166498 |
| CHML       | 0.166413 |
| UBTD1      | 0.166386 |
| FLII       | 0.166381 |
| GPATCH4    | 0.166367 |
| MYL9       | 0.166136 |
| CREB5      | 0.166018 |
| SEPTIN10   | 0.165974 |
| CTNNAL1    | 0.165948 |
| AL512353.1 | 0.165908 |
| NDC1       | 0.165781 |
| PDE3A      | 0.16578  |
| SLC2A4RG   | 0.165733 |



|            |          |
|------------|----------|
| MSANTD3    | 0.165694 |
| HAGLROS    | 0.165447 |
| GPSM1      | 0.165418 |
| LUZP1      | 0.165418 |
| TTYH3      | 0.165366 |
| NELL1      | 0.16532  |
| FAM86EP    | 0.165242 |
| HOXB9      | 0.165235 |
| SRPX2      | 0.165231 |
| CUL7       | 0.16521  |
| AL645608.8 | 0.165087 |
| HACD2      | 0.165086 |
| CTHRC1     | 0.165021 |
| IFRD2      | 0.164991 |
| SLC25A10   | 0.164641 |
| MCM2       | 0.164442 |
| YWHAE      | 0.164384 |
| FABP5      | 0.164267 |
| KIF13A     | 0.164262 |
| FOXO6      | 0.164176 |
| MTMR2      | 0.164137 |
| CLDN7      | 0.163982 |
| CAVIN3     | 0.163955 |
| FAM207A    | 0.163939 |
| ISYNA1     | 0.163793 |
| RPS3AP26   | 0.163738 |
| ADAMTS7    | 0.163734 |
| HDGFP1     | 0.1637   |
| AC018904.1 | 0.163649 |
| FAM110C    | 0.163619 |
| AC013457.1 | 0.163575 |
| C2CD4D-AS1 | 0.163571 |
| JUP        | 0.163519 |
| KDF1       | 0.163477 |
| NOL3       | 0.163345 |
| FEZF1      | 0.163316 |
| NRTN       | 0.163283 |
| ZNF697     | 0.163265 |
| BCORL1     | 0.163259 |
| EHMT2      | 0.163197 |
| FAH        | 0.163159 |
| FIP1L1     | 0.163091 |
| C5orf22    | 0.162822 |
| KIAA1217   | 0.162733 |
| AHDC1      | 0.162559 |
| RPS20P14   | 0.16253  |
| VANGL1     | 0.162265 |
| TEAD2      | 0.162186 |
| ASIC3      | 0.162124 |

|            |          |
|------------|----------|
| DTL        | 0.162038 |
| TENT5A     | 0.161956 |
| CRK        | 0.161666 |
| RPS10P9    | 0.161595 |
| CHST3      | 0.161573 |
| HIF3A      | 0.161547 |
| TAF6       | 0.161526 |
| LYAR       | 0.161516 |
| OPN1SW     | 0.161485 |
| HTRA1      | 0.161283 |
| LINC02471  | 0.161231 |
| PCYT2      | 0.161147 |
| MTHFS      | 0.161144 |
| PRKCA      | 0.161065 |
| CCDC9B     | 0.161056 |
| LINC01843  | 0.160635 |
| CHPT1      | 0.160622 |
| GAREM2     | 0.160592 |
| AC107983.1 | 0.160394 |
| TMEM99     | 0.160282 |
| SLC35A2    | 0.160213 |
| SLC39A10   | 0.160185 |
| ERLIN2     | 0.160163 |
| FAM189B    | 0.160054 |
| AC083900.1 | 0.159995 |
| BCL9       | 0.159975 |
| ME1        | 0.159956 |
| MRPL37     | 0.159951 |
| SLC6A14    | 0.159886 |
| NFYA       | 0.159852 |
| AL031587.5 | 0.159764 |
| AFAP1      | 0.159746 |
| PKDCC      | 0.159735 |
| AL136452.1 | 0.159723 |
| KIF14      | 0.159677 |
| LINC02550  | 0.159612 |
| B4GALT1    | 0.159581 |
| QSOX1      | 0.159369 |
| AC092115.3 | 0.159368 |
| CDC42BPB   | 0.159318 |
| RPL23AP65  | 0.159229 |
| EPHB2      | 0.159091 |
| KLRG2      | 0.159017 |
| ERO1A      | 0.158865 |
| TLE2       | 0.158825 |
| PRDX6      | 0.15876  |
| GPR27      | 0.158628 |
| RPSAP7     | 0.158476 |
| PMS2P1     | 0.158408 |

|            |          |
|------------|----------|
| BCL2L15    | 0.158161 |
| LMTK2      | 0.158114 |
| BIRC5      | 0.158019 |
| SCGB3A2    | 0.157894 |
| DLD        | 0.157892 |
| TUBA1B     | 0.157751 |
| LYPD5      | 0.157713 |
| CLUH       | 0.157664 |
| EIF4A3     | 0.157519 |
| NOB1       | 0.15751  |
| CPB2       | 0.157389 |
| SEMA6C     | 0.156975 |
| TFG        | 0.156938 |
| SLC35G2    | 0.156822 |
| CLSTN1     | 0.156806 |
| SNHG32     | 0.156772 |
| AL049836.1 | 0.156617 |
| NOC2L      | 0.156538 |
| RPL31P17   | 0.156512 |
| BDKRB2     | 0.156417 |
| DNTTIP2    | 0.156342 |
| GSTM3      | 0.156265 |
| LINC02038  | 0.156254 |
| AL662791.1 | 0.156232 |
| PTPN14     | 0.156097 |
| VGLL4      | 0.156091 |
| AMOT       | 0.156025 |
| CPSF4      | 0.156024 |
| ANKS6      | 0.155966 |
| LATS2      | 0.155956 |
| C15orf39   | 0.155784 |
| URGCP      | 0.155745 |
| KDM5B      | 0.155717 |
| S100A6     | 0.155591 |
| LINC01376  | 0.155579 |
| GEMIN4     | 0.155552 |
| FAM220A    | 0.155538 |
| C5orf34    | 0.155529 |
| AP001324.1 | 0.155521 |
| GPRC5D-AS1 | 0.155508 |
| PPAT       | 0.155275 |
| TNRC18     | 0.15527  |
| HSD17B1    | 0.155248 |
| SLC27A4    | 0.155003 |
| RPL26P19   | 0.154983 |
| PIEZO1     | 0.154919 |
| MTCH1      | 0.154879 |
| WTIP       | 0.15485  |
| TACC2      | 0.154808 |

|            |          |
|------------|----------|
| FTH1P7     | 0.154773 |
| SPDYE3     | 0.15473  |
| PRR4       | 0.154635 |
| PCYOX1     | 0.154569 |
| BRX1       | 0.154513 |
| PPP2R5D    | 0.154453 |
| PRELID1P6  | 0.15441  |
| XRCC2      | 0.154402 |
| DAGLB      | 0.154109 |
| YWHAZP10   | 0.154028 |
| BAG6       | 0.154028 |
| RPS15P4    | 0.154016 |
| KIF20A     | 0.153999 |
| SCCPDH     | 0.153912 |
| CCND1      | 0.153894 |
| SMPDL3B    | 0.153869 |
| POMGNT1    | 0.153826 |
| KRT6B      | 0.153811 |
| ELMO3      | 0.153728 |
| PTER       | 0.153716 |
| TRAF7      | 0.153673 |
| TAF5       | 0.153668 |
| PRRC2A     | 0.153623 |
| ADK        | 0.153592 |
| CHAF1B     | 0.153508 |
| ATAD3A     | 0.153396 |
| RERG       | 0.153287 |
| PLS1       | 0.153267 |
| MEIS3      | 0.153232 |
| AC093297.2 | 0.153163 |
| PLCB3      | 0.15314  |
| RPL37      | 0.153106 |
| MAD1L1     | 0.153078 |
| GPN1       | 0.153075 |
| SLC5A6     | 0.153049 |
| AC099336.2 | 0.153034 |
| RNU6-403P  | 0.153004 |
| MRPS17     | 0.152979 |
| RBM8B      | 0.15295  |
| KLHDC3     | 0.152805 |
| KNDC1      | 0.152759 |
| CDKN1A     | 0.152648 |
| CLIP1      | 0.152642 |
| NDFIP2     | 0.152619 |
| PARS2      | 0.152416 |
| CCDC77     | 0.152401 |
| SPATA5L1   | 0.152339 |
| TRIM8      | 0.152257 |
| BAG3       | 0.151874 |

|            |          |
|------------|----------|
| CPTP       | 0.151799 |
| SRGAP1     | 0.151781 |
| AC091153.1 | 0.151767 |
| BAHCC1     | 0.151745 |
| HDGF       | 0.151716 |
| TTC4       | 0.151562 |
| ZNF135     | 0.151542 |
| P4HA3      | 0.151462 |
| CANT1      | 0.151396 |
| RANP1      | 0.15126  |
| THNSL2     | 0.151146 |
| LPCAT4     | 0.151118 |
| ANO7       | 0.151092 |
| DNAJC2     | 0.151064 |
| TMEM238    | 0.151031 |
| POU6F2-AS2 | 0.151003 |
| PALM       | 0.150964 |
| MRGBP      | 0.150957 |
| PRRX1      | 0.15082  |
| MRPL2      | 0.150815 |
| RAD51      | 0.150806 |
| NCOR2      | 0.150794 |
| EMP1       | 0.150711 |
| MAP1B      | 0.150671 |
| SLC39A7    | 0.150642 |
| ADAMTS3    | 0.150536 |
| GPB1       | 0.15051  |
| VPS37B     | 0.150496 |
| SMAD1      | 0.150255 |
| FOXD1      | 0.150082 |
| BLVRB      | 0.150054 |
| RBMS2      | 0.150001 |
| SATB2      | 0.149995 |
| AC107956.1 | 0.149939 |
| AGRP       | 0.149937 |
| NPM1P6     | 0.149783 |
| GRPEL1     | 0.149769 |
| PFN1P1     | 0.149747 |
| ARHGEF17   | 0.149747 |
| FTH1P15    | 0.149732 |
| NUP153     | 0.149683 |
| NID1       | 0.149593 |
| LINC00958  | 0.149335 |
| CHST14     | 0.14918  |
| MAP4K4     | 0.149162 |
| GDF5       | 0.149085 |
| ENO1       | 0.149079 |
| ATP2B4     | 0.149071 |
| SLC22A3    | 0.149035 |

|            |          |
|------------|----------|
| ECHDC3     | 0.149019 |
| AC026403.1 | 0.149009 |
| POGLUT3    | 0.148951 |
| ABCG2      | 0.148868 |
| HAS2       | 0.14881  |
| TNFRSF21   | 0.14879  |
| FAP        | 0.148776 |
| RPL7AP50   | 0.148748 |
| MIEF2      | 0.14873  |
| SLC12A7    | 0.148656 |
| PJA1       | 0.148612 |
| PDGFD      | 0.148602 |
| RPS2P55    | 0.148563 |
| SLC25A37   | 0.148505 |
| SPRYD7     | 0.148444 |
| SLPI       | 0.14837  |
| NOA1       | 0.148346 |
| GPAT4      | 0.148327 |
| TUBBP1     | 0.148291 |
| DNAJB6P1   | 0.14829  |
| ADGRL1     | 0.1482   |
| LINC01942  | 0.148197 |
| SF3B4      | 0.148083 |
| POLR2A     | 0.147964 |
| NCAPG      | 0.147935 |
| BX679664.1 | 0.147927 |
| AL365205.1 | 0.14784  |
| GLIS2      | 0.147832 |
| LAMP5      | 0.1478   |
| ABCA4      | 0.147691 |
| EIF4BP7    | 0.147533 |
| MCFD2      | 0.147514 |
| GALK1      | 0.147504 |
| EPS8       | 0.147451 |
| ALDH1A1    | 0.147404 |
| AC021074.1 | 0.147378 |
| AOC1       | 0.147374 |
| CCDC120    | 0.147349 |
| NME2       | 0.14723  |
| ELK3       | 0.146982 |
| SNORD14E   | 0.146961 |
| FLNA       | 0.146919 |
| THOC3      | 0.146899 |
| B4GALNT4   | 0.146891 |
| TGFB1I1    | 0.146749 |
| SSH3       | 0.146735 |
| METTL26    | 0.146701 |
| AC090498.1 | 0.14668  |
| AC016877.3 | 0.146672 |

|            |          |
|------------|----------|
| PCCA-DT    | 0.146666 |
| GRHL1      | 0.146498 |
| LINC02542  | 0.146474 |
| SPNS2      | 0.146464 |
| SLC12A8    | 0.14646  |
| MUC16      | 0.146445 |
| CNN2       | 0.146443 |
| AC008771.1 | 0.146327 |
| CIP2A      | 0.146285 |
| TWINK      | 0.146212 |
| GNAI1      | 0.146144 |
| CYP2D6     | 0.146125 |
| EFEMP2     | 0.14602  |
| RARA       | 0.14595  |
| TMC4       | 0.145937 |
| KRT8P45    | 0.145892 |
| BID        | 0.145877 |
| GLT8D2     | 0.145845 |
| AC137932.1 | 0.14583  |
| GGTLC1     | 0.145801 |
| SUN1       | 0.145778 |
| DSE        | 0.145749 |
| CCNB1      | 0.145712 |
| NR2F2      | 0.145711 |
| PGM2L1     | 0.145573 |
| NOX4       | 0.145463 |
| FRG1JP     | 0.145383 |
| EFEMP1     | 0.145348 |
| MIF        | 0.145337 |
| IL1RL2     | 0.145308 |
| ARF4       | 0.145246 |
| CCNA2      | 0.145227 |
| FAM83H     | 0.145216 |
| AC087343.1 | 0.145188 |
| RILPL1     | 0.145122 |
| DGAT1      | 0.145071 |
| MED20      | 0.145045 |
| GAPDHP1    | 0.144958 |
| CNN1       | 0.144884 |
| RN7SL689P  | 0.144872 |
| UBE2MP1    | 0.144815 |
| SOX4       | 0.14476  |
| TRGJP2     | 0.144709 |
| SLC22A18   | 0.144681 |
| PSMG3      | 0.144657 |
| MAP2       | 0.144632 |
| ZNF165     | 0.144615 |
| TANC2      | 0.144472 |
| RAB7B      | 0.144445 |

|            |          |
|------------|----------|
| TMPRSS13   | 0.144376 |
| MCM3       | 0.144112 |
| POLR2J     | 0.144098 |
| CKS1B      | 0.144091 |
| PSMD4      | 0.143988 |
| ARHGEF19   | 0.143981 |
| MAGED1     | 0.143946 |
| NDUFV2P1   | 0.143898 |
| ZNF503     | 0.143723 |
| PDLIM5     | 0.143584 |
| NADK2      | 0.143355 |
| MAP7D2     | 0.143339 |
| AC004890.1 | 0.143336 |
| LARP6      | 0.14319  |
| KRTAP4-1   | 0.143112 |
| KCTD11     | 0.14309  |
| ESYT2      | 0.143044 |
| B4GALT4    | 0.142994 |
| FIGN       | 0.142887 |
| ALDOC      | 0.142808 |
| PON3       | 0.142648 |
| B3GALT6    | 0.142564 |
| SNHG29     | 0.142503 |
| SLC7A1     | 0.142491 |
| RCC1       | 0.142482 |
| IGFL2      | 0.14245  |
| RPUSD1     | 0.142448 |
| AL109914.1 | 0.142363 |
| LINC00467  | 0.142312 |
| EMC1       | 0.142226 |
| NACA3P     | 0.142176 |
| RPL13P5    | 0.142081 |
| KCNK3      | 0.142007 |
| FMOD       | 0.141868 |
| GNS        | 0.141651 |
| TENT5B     | 0.141534 |
| EIF5A      | 0.141412 |
| YAP1       | 0.141366 |
| SH3GL1     | 0.141235 |
| H1-0       | 0.141207 |
| STIL       | 0.141175 |
| APLP2      | 0.141126 |
| UCK2       | 0.141019 |
| EDNRA      | 0.140991 |
| RPL26P6    | 0.140881 |
| AQP1       | 0.140871 |
| FNDC10     | 0.1407   |
| PCDHB13    | 0.140685 |
| ADAMTS15   | 0.140684 |



|            |          |
|------------|----------|
| PIP5KL1    | 0.140556 |
| HOXB-AS3   | 0.140513 |
| CDYL       | 0.14051  |
| LRRC20     | 0.140392 |
| AC012640.2 | 0.140377 |
| SLC16A6    | 0.140368 |
| RNF208     | 0.140367 |
| PTK7       | 0.140275 |
| TSPAN15    | 0.140253 |
| CXCR1      | 0.140242 |
| MSRB3      | 0.140171 |
| RFLNA      | 0.140161 |
| MFAP1      | 0.140154 |
| APLNR      | 0.140132 |
| C11orf95   | 0.140074 |
| ERGIC1     | 0.140043 |
| HAS3       | 0.140021 |
| TMEM87A    | 0.139911 |
| SBDS       | 0.139899 |
| LRRC3      | 0.139818 |
| RPS6KA4    | 0.139808 |
| HAVCR1     | 0.139635 |
| BX679664.3 | 0.139523 |
| HLX        | 0.139437 |
| FOXP4      | 0.139399 |
| SPRY2      | 0.139337 |
| C2CD4D     | 0.139289 |
| FZD2       | 0.139281 |
| SGCD       | 0.139279 |
| AL359091.4 | 0.139228 |
| ABHD2      | 0.139199 |
| ELN        | 0.139177 |
| CPNE8      | 0.139119 |
| H3P16      | 0.139104 |
| AC027307.2 | 0.139085 |
| P4HB       | 0.13904  |
| RBKS       | 0.139007 |
| AC127496.5 | 0.138958 |
| MCM10      | 0.138938 |
| CDC25C     | 0.138885 |
| TMEM120A   | 0.138716 |
| AL161421.1 | 0.138651 |
| FTH1P5     | 0.138537 |
| TMEM14A    | 0.138528 |
| LRIF1      | 0.138502 |
| MRPL33     | 0.138448 |
| CD207      | 0.138361 |
| MATN3      | 0.138276 |
| SRD5A1     | 0.138184 |

|             |          |
|-------------|----------|
| SYNC        | 0.138135 |
| TFR2        | 0.138102 |
| LIMCH1      | 0.1381   |
| CYSTM1      | 0.138045 |
| DNM3        | 0.138036 |
| SEC61G      | 0.137943 |
| METAP1D     | 0.137928 |
| EEF1B2P6    | 0.137906 |
| CHST15      | 0.137879 |
| CNNM4       | 0.137808 |
| PLLP        | 0.137803 |
| COA7        | 0.137725 |
| BLACAT1     | 0.13768  |
| CERS2       | 0.137597 |
| ADCY3       | 0.137585 |
| IGSF9       | 0.137478 |
| TICAM1      | 0.137374 |
| CLDN12      | 0.137355 |
| MIR4435-2HG | 0.13734  |
| DFFA        | 0.137302 |
| IL17RC      | 0.137279 |
| SEN2        | 0.137266 |
| CMTM8       | 0.137202 |
| UBE2D3-AS1  | 0.137165 |
| SLC16A13    | 0.137161 |
| HK1         | 0.137111 |
| AC021106.1  | 0.137096 |
| MMACHC      | 0.137074 |
| NET1        | 0.137033 |
| RAC1        | 0.13688  |
| SLC39A1     | 0.136842 |
| FADD        | 0.136833 |
| CDCA5       | 0.136804 |
| C1orf56     | 0.136774 |
| PYCR1       | 0.136768 |
| NELFE       | 0.136755 |
| GLOD5       | 0.136755 |
| RNF145      | 0.136677 |
| GNG12       | 0.136479 |
| IRX5        | 0.136429 |
| COMT        | 0.136406 |
| UBE2E3      | 0.13633  |
| CLDN23      | 0.136315 |
| MRPS10      | 0.136289 |
| TBC1D22B    | 0.136111 |
| MYO10       | 0.136097 |
| COPG2       | 0.136039 |
| CKAP2       | 0.135984 |
| AC064799.1  | 0.135894 |

|            |          |
|------------|----------|
| EEF1A1P11  | 0.135856 |
| TAF13      | 0.135799 |
| FLAD1      | 0.135783 |
| TUBB4A     | 0.135682 |
| MMP3       | 0.135611 |
| SYPL1      | 0.135601 |
| HGSNAT     | 0.135389 |
| RPL22P1    | 0.135341 |
| FA2H       | 0.135319 |
| OSMR-AS1   | 0.135304 |
| MAP4       | 0.135292 |
| RPS15AP12  | 0.135272 |
| AC108463.1 | 0.135235 |
| MEOX2      | 0.135234 |
| GOLM1      | 0.1352   |
| USP5       | 0.135196 |
| HEY2       | 0.135191 |
| SSBP3      | 0.135065 |
| DHFR       | 0.135058 |
| AL162231.2 | 0.135036 |
| STX17-AS1  | 0.134963 |
| RND2       | 0.134937 |
| EEF1A1P6   | 0.134917 |
| GAS2       | 0.134842 |
| AL117327.1 | 0.13467  |
| AL391121.1 | 0.134532 |
| AC018521.5 | 0.13446  |
| AL035411.1 | 0.134434 |
| PON2       | 0.134401 |
| LIMK1      | 0.134379 |
| SLC16A4    | 0.134373 |
| ZNF286A    | 0.134343 |
| PKN3       | 0.134287 |
| TMEM132A   | 0.134268 |
| TEDC2      | 0.134263 |
| SPC25      | 0.134197 |
| ABLIM3     | 0.134141 |
| AC090772.3 | 0.134106 |
| ABCB9      | 0.134019 |
| AC005840.1 | 0.133896 |
| AL354714.2 | 0.133879 |
| XAGE2      | 0.133834 |
| TNIP2      | 0.133831 |
| TRIP13     | 0.133811 |
| VPS72      | 0.133784 |
| PCDHB6     | 0.133749 |
| MRPL24     | 0.133742 |
| AC034231.1 | 0.133708 |
| PSMC2P1    | 0.133679 |

|            |          |
|------------|----------|
| CCT3       | 0.133645 |
| PLXNA1     | 0.133597 |
| OCIAD2     | 0.133514 |
| ICAM5      | 0.133503 |
| MRPL14     | 0.133496 |
| SULF1      | 0.133451 |
| CDH11      | 0.133439 |
| FGGY       | 0.133364 |
| RRP12      | 0.133356 |
| PELO       | 0.133347 |
| PLPPR1     | 0.13333  |
| CLCN3      | 0.133308 |
| EBNA1BP2   | 0.133241 |
| SMIM24     | 0.133227 |
| POGLUT2    | 0.133201 |
| VDAC2      | 0.133196 |
| LRRC15     | 0.133164 |
| B3GALNT1   | 0.133031 |
| STUB1      | 0.133022 |
| AL138760.1 | 0.132989 |
| C3orf86    | 0.13298  |
| PFDN2      | 0.13298  |
| NCAPG2     | 0.132974 |
| AL355796.1 | 0.13294  |
| LINC01977  | 0.132937 |
| USP46      | 0.13292  |
| PHKA1      | 0.132865 |
| BRF2       | 0.132626 |
| IDUA       | 0.132598 |
| ZNF503-AS2 | 0.132582 |
| PEX11A     | 0.13256  |
| TM7SF3     | 0.132506 |
| CARD6      | 0.132341 |
| ZFYVE9     | 0.132286 |
| METRNL     | 0.132285 |
| MSN        | 0.132259 |
| CACNA1H    | 0.132256 |
| NFIC       | 0.132221 |
| TIPARP     | 0.132218 |
| HJURP      | 0.132211 |
| ADIPOR2    | 0.132116 |
| SPTSSB     | 0.13211  |
| PAX8-AS1   | 0.132101 |
| SERTAD4    | 0.132089 |
| THEM4      | 0.132057 |
| PANX1      | 0.131992 |
| POLR1F     | 0.131978 |
| JMJD8      | 0.13196  |
| RANBP1     | 0.131949 |

|            |          |
|------------|----------|
| SEZ6L2     | 0.131882 |
| AL355802.1 | 0.131846 |
| ASAH2B     | 0.131835 |
| LIMA1      | 0.131822 |
| CCL26      | 0.131773 |
| HNFB1      | 0.131742 |
| NPW        | 0.131559 |
| DOCK7      | 0.131547 |
| CTNNA1     | 0.131546 |
| RPLP0P2    | 0.131515 |
| CDT1       | 0.131512 |
| WASL       | 0.131475 |
| ARMC10     | 0.131448 |
| PLK1       | 0.131438 |
| AC244517.7 | 0.131426 |
| ALDH18A1   | 0.131358 |
| XPO5       | 0.131351 |
| LY6K       | 0.131151 |
| ALDH1B1    | 0.131144 |
| LRRC59     | 0.131062 |
| ARHGAP28   | 0.131008 |
| NOCT       | 0.131008 |
| MDH2       | 0.130993 |
| RIT1       | 0.130987 |
| SPAG5      | 0.130941 |
| SPRED2     | 0.130886 |
| NECTIN4    | 0.130872 |
| PLEKHA8P1  | 0.130854 |
| POLH-AS1   | 0.130821 |
| IMPDH2     | 0.13082  |
| RNF2       | 0.130747 |
| EREG       | 0.130746 |
| ACTA2      | 0.130709 |
| GTSE1      | 0.130688 |
| AC145207.8 | 0.130665 |
| LAMB2      | 0.130601 |
| MECR       | 0.13057  |
| PUS7       | 0.130386 |
| LRRN2      | 0.130331 |
| FRMD6      | 0.130189 |
| CTBP2      | 0.130157 |
| ESPL1      | 0.130059 |
| SERPINB1   | 0.130004 |
| CUX1       | 0.129977 |
| IL23A      | 0.129949 |
| HNRNPKP1   | 0.12993  |
| CARNS1     | 0.129895 |
| AL590682.1 | 0.129837 |
| MIR4737    | 0.129633 |

|            |          |
|------------|----------|
| VCAN       | 0.129617 |
| AC010735.2 | 0.129607 |
| ITPRID2    | 0.129552 |
| RAB40C     | 0.129515 |
| MRPS34     | 0.129405 |
| ZNF687     | 0.129338 |
| TCOF1      | 0.129183 |
| CLIC4      | 0.129139 |
| SFTPB      | 0.12909  |
| TUBG1      | 0.129076 |
| EIF4H      | 0.129075 |
| AC112491.1 | 0.129045 |
| AL049873.1 | 0.128968 |
| TGIF1      | 0.128938 |
| TMEM35B    | 0.1289   |
| NBDY       | 0.128877 |
| FMN1       | 0.128764 |
| DHFRP1     | 0.128747 |
| NUDCD3     | 0.128734 |
| ST3GAL3    | 0.128572 |
| CDC25A     | 0.128516 |
| YWHAZP5    | 0.128498 |
| RPL24P2    | 0.128496 |
| SGCB       | 0.128439 |
| CKAP2L     | 0.128417 |
| LTBP3      | 0.128385 |
| SF3B6      | 0.128377 |
| NIPA1      | 0.128343 |
| LINC02772  | 0.128337 |
| POLR1C     | 0.128164 |
| PLXNB2     | 0.128154 |
| SNRPEP4    | 0.128131 |
| RHBDL1     | 0.128046 |
| NOL4L      | 0.127972 |
| AIFM2      | 0.127963 |
| TMEM240    | 0.127953 |
| NME1-NME2  | 0.12791  |
| H2BC12     | 0.1279   |
| HGS        | 0.127805 |
| FUT3       | 0.127733 |
| MRPL9      | 0.12763  |
| GNA12      | 0.127544 |
| ANGPTL2    | 0.127527 |
| STRAP      | 0.12744  |
| DSP        | 0.127352 |
| AC005034.3 | 0.127344 |
| PPME1      | 0.127339 |
| FTH1P20    | 0.127318 |
| MRPS30     | 0.127301 |

|            |          |
|------------|----------|
| AGFG1      | 0.127227 |
| PPIC       | 0.12722  |
| LSM1       | 0.127072 |
| NECTIN3    | 0.127003 |
| GABRE      | 0.126997 |
| GABARAPL1  | 0.126942 |
| SMS        | 0.126844 |
| UBAP1      | 0.126729 |
| KPNA2      | 0.12663  |
| EIF4HP1    | 0.126587 |
| ZNHIT1     | 0.126582 |
| ECI1       | 0.126559 |
| HOXB7      | 0.126435 |
| AZGP1      | 0.126357 |
| CEP170B    | 0.126284 |
| AC138207.2 | 0.12627  |
| RPL24P8    | 0.126187 |
| PTPN21     | 0.126147 |
| ZCRB1      | 0.126146 |
| TSSK5P     | 0.126123 |
| AC068305.2 | 0.126096 |
| RPS3AP47   | 0.126076 |
| IGSF8      | 0.126033 |
| MMP28      | 0.126023 |
| TARS2      | 0.125942 |
| CXXC4      | 0.125927 |
| VSIG10     | 0.125884 |
| PAK4       | 0.125849 |
| PTP4A1     | 0.125818 |
| AL355472.1 | 0.125785 |
| CRKL       | 0.125674 |
| SSR4P1     | 0.125669 |
| NCSTN      | 0.125603 |
| KCNJ8      | 0.125595 |
| ARMC7      | 0.125584 |
| SMN2       | 0.125552 |
| PICART1    | 0.125542 |
| TVP23B     | 0.125409 |
| PMAIP1     | 0.125276 |
| IRF6       | 0.125244 |
| ALKBH4     | 0.125207 |
| AP2B1      | 0.125207 |
| CRLF1      | 0.125188 |
| B3GNT5     | 0.125181 |
| AMN1       | 0.125116 |
| ZNF711     | 0.125023 |
| TCF7L2     | 0.12498  |
| WNT5B      | 0.124968 |
| BRI3       | 0.124919 |

|            |          |
|------------|----------|
| CYS1       | 0.124869 |
| TRAP1      | 0.12483  |
| PCBP2P2    | 0.124782 |
| CD9        | 0.12478  |
| CAD        | 0.124745 |
| TACC3      | 0.124724 |
| NUDT16L2P  | 0.124708 |
| PPIAP11    | 0.124659 |
| ZNF281     | 0.124647 |
| MYCN       | 0.124618 |
| CCN3       | 0.124581 |
| MYADM      | 0.12451  |
| ALDH5A1    | 0.124431 |
| AC010789.1 | 0.124409 |
| ERCC6L     | 0.124398 |
| ENC1       | 0.124393 |
| GNL1       | 0.124354 |
| ATP5MF     | 0.124347 |
| LMNB2      | 0.124341 |
| ALDH7A1    | 0.124335 |
| PEG10      | 0.124299 |
| DDAH2      | 0.124298 |
| AC087645.2 | 0.124263 |
| RCN2       | 0.124215 |
| SEC23A     | 0.124189 |
| FAM162A    | 0.124123 |
| FBN1       | 0.124071 |
| SNHG5      | 0.124055 |
| AATF       | 0.124029 |
| CHCHD2     | 0.123962 |
| GTF2IRD1   | 0.123938 |
| FKBPL      | 0.123896 |
| C9orf64    | 0.123874 |
| UBE2C      | 0.123848 |
| DGCR5      | 0.123739 |
| ZPR1       | 0.123673 |
| DDX56      | 0.12367  |
| TNFRSF11B  | 0.123664 |
| MMP24      | 0.123663 |
| KCTD21     | 0.123629 |
| LZTS2      | 0.123614 |
| ITGA10     | 0.12359  |
| BCL10      | 0.123579 |
| HNRNPA1P48 | 0.123553 |
| TNNI3      | 0.12353  |
| SRPK1      | 0.123503 |
| FIS1       | 0.123469 |
| AFAP1-AS1  | 0.12339  |
| TMEM105    | 0.12326  |



|             |          |
|-------------|----------|
| LINC01836   | 0.1232   |
| SPSB2       | 0.123152 |
| MIR663AHG   | 0.122973 |
| AL031729.1  | 0.122961 |
| PAWR        | 0.122918 |
| PELP1       | 0.122828 |
| AC107294.3  | 0.122803 |
| AC127521.1  | 0.122798 |
| GPT         | 0.122773 |
| AL158071.2  | 0.122772 |
| CYTOR       | 0.12268  |
| TRIB3       | 0.122639 |
| GRAMD2B     | 0.12255  |
| CACNB3      | 0.122545 |
| PRSS16      | 0.122512 |
| FN1         | 0.122485 |
| SAMD4B      | 0.122437 |
| AREG        | 0.122365 |
| SNX9        | 0.122358 |
| FAM83D      | 0.122303 |
| STK38       | 0.122235 |
| MIS18A      | 0.122172 |
| GSTP1       | 0.122117 |
| YARS2       | 0.122082 |
| BCAM        | 0.122019 |
| PAGE5       | 0.122017 |
| MICALL1     | 0.122    |
| NDC80       | 0.121943 |
| CRIP2       | 0.121816 |
| RPL21P16    | 0.121784 |
| RITA1       | 0.121762 |
| ANTXR2      | 0.121749 |
| SERPINA1    | 0.121722 |
| RCN1        | 0.121695 |
| PIGS        | 0.121663 |
| AC245033.3  | 0.121636 |
| CYB5D2      | 0.121498 |
| NAA38       | 0.12146  |
| EXOSC10-AS1 | 0.121409 |
| PTMAP2      | 0.121379 |
| LETM1       | 0.121375 |
| TBXA2R      | 0.121353 |
| OXTR        | 0.121334 |
| DUSP14      | 0.121228 |
| MYB         | 0.121154 |
| RCN1P2      | 0.121153 |
| SGCG        | 0.121097 |
| ARCN1       | 0.121073 |
| KCNK1       | 0.121039 |

|            |          |
|------------|----------|
| OTUD7B     | 0.121028 |
| RFC3       | 0.121018 |
| C3orf18    | 0.120994 |
| SCNN1A     | 0.120944 |
| MYH10      | 0.120942 |
| USP1       | 0.120911 |
| SLC48A1    | 0.120829 |
| NLE1       | 0.120798 |
| ADORA2B    | 0.120782 |
| RPS13P2    | 0.120759 |
| BAG4       | 0.120758 |
| EIF6       | 0.120749 |
| CRTAC1     | 0.120707 |
| RSP02      | 0.120705 |
| ZBTB4      | 0.120602 |
| H4C9       | 0.120541 |
| RTL10      | 0.120506 |
| ACHE       | 0.120461 |
| EPB41L1    | 0.120438 |
| SOX13      | 0.120346 |
| LINC01291  | 0.120278 |
| MRM2       | 0.120256 |
| HENMT1     | 0.120255 |
| TRIM11     | 0.120248 |
| PLIN2      | 0.120245 |
| TMEM106C   | 0.120239 |
| NUFIP1     | 0.120198 |
| UNC45A     | 0.120197 |
| TLCD3A     | 0.120191 |
| E2F8       | 0.120106 |
| DAPK1      | 0.120064 |
| HMGCS1     | 0.120052 |
| HOMER3     | 0.120024 |
| NTMT1      | 0.119971 |
| BX248409.1 | 0.119931 |
| RRP36      | 0.119849 |
| STARD4-AS1 | 0.119845 |
| C11orf24   | 0.119813 |
| ADGRF5     | 0.119812 |
| CYB5R3     | 0.119802 |
| ROR1       | 0.119786 |
| AC010332.1 | 0.119738 |
| AC018647.2 | 0.119712 |
| AGAP2-AS1  | 0.119689 |
| AL928654.4 | 0.119633 |
| CDK5RAP2   | 0.119586 |
| AP3S1      | 0.119586 |
| AC018553.1 | 0.11952  |
| ECE2       | 0.119514 |

|             |          |
|-------------|----------|
| PRR13P5     | 0.119505 |
| ALYREF      | 0.11939  |
| CAMSAP2     | 0.119331 |
| TPMT        | 0.119323 |
| SLC2A12     | 0.119308 |
| RALA        | 0.119282 |
| HILPDA      | 0.119208 |
| PHF23       | 0.119192 |
| ST14        | 0.119166 |
| SOX12       | 0.119165 |
| CD55        | 0.119155 |
| REXO2       | 0.11912  |
| VSNL1       | 0.118986 |
| TIMP4       | 0.118955 |
| MPRIP       | 0.118911 |
| DVL2        | 0.11891  |
| CYP2C18     | 0.118886 |
| ABCF1       | 0.11882  |
| HTATIP2     | 0.118759 |
| FAM86C1P    | 0.118716 |
| AC243964.4  | 0.118666 |
| USP22       | 0.118635 |
| PNPLA2      | 0.118547 |
| CSE1L       | 0.118533 |
| SGO1        | 0.118377 |
| CYB5R1      | 0.118359 |
| VPS52       | 0.118271 |
| KIF11       | 0.118218 |
| BUD31       | 0.118174 |
| DDX54       | 0.118165 |
| CALD1       | 0.11812  |
| MYG1        | 0.118112 |
| PHLDA1      | 0.118094 |
| BOK         | 0.11805  |
| BEX3        | 0.117965 |
| PPP1R3F     | 0.117964 |
| TOMM34      | 0.117949 |
| AC114488.1  | 0.117805 |
| BRPF3       | 0.117757 |
| CD59        | 0.117755 |
| TBKBP1      | 0.117728 |
| EIF4A1P10   | 0.117659 |
| NUSAP1      | 0.117656 |
| PON1        | 0.117647 |
| PBX1        | 0.117637 |
| SPATS2L     | 0.117583 |
| SLC44A3-AS1 | 0.117557 |
| MSC-AS1     | 0.117545 |
| COPZ1       | 0.117532 |

|             |          |
|-------------|----------|
| RNPEP       | 0.117524 |
| PDE4A       | 0.117455 |
| YWHAZP2     | 0.117448 |
| PPM1G       | 0.117433 |
| GGCT        | 0.117247 |
| ACACA       | 0.117215 |
| AL589880.1  | 0.117135 |
| FZD7        | 0.11712  |
| AC115223.1  | 0.117104 |
| TMEM167A    | 0.117104 |
| RPL23AP74   | 0.1171   |
| MCM4        | 0.117062 |
| DSTNP2      | 0.117033 |
| PLEKHH3     | 0.116859 |
| RPS8        | 0.116765 |
| COLGALT1    | 0.116755 |
| EXTL3       | 0.116674 |
| AC078817.1  | 0.116643 |
| MT1XP1      | 0.116633 |
| AC097658.1  | 0.116627 |
| LINC00997   | 0.116509 |
| FBXL7       | 0.116501 |
| EVC2        | 0.116385 |
| SRP72       | 0.116377 |
| NKAIN4      | 0.116367 |
| RPL7L1      | 0.116362 |
| MIR210HG    | 0.116344 |
| NSUN2       | 0.116332 |
| PGAM1       | 0.116172 |
| COX6A1P2    | 0.116155 |
| IRS2        | 0.116149 |
| FTH1P10     | 0.116145 |
| DCTN1       | 0.11608  |
| EIF4EBP1    | 0.116049 |
| ICMT        | 0.115996 |
| ZFYVE19     | 0.115961 |
| MESD        | 0.115946 |
| C8orf34-AS1 | 0.115914 |
| SFTA1P      | 0.115881 |
| DPH2        | 0.115832 |
| LINC00205   | 0.115826 |
| ZNF528-AS1  | 0.11582  |
| AC025449.1  | 0.115804 |
| AGBL5       | 0.115775 |
| PDE4C       | 0.115716 |
| AL451085.2  | 0.115608 |
| DHCR7       | 0.115597 |
| CIB2        | 0.115597 |
| DKK3        | 0.115473 |

|            |          |
|------------|----------|
| PTGES3     | 0.115463 |
| LINC02014  | 0.115431 |
| MRPS18B    | 0.1154   |
| ZC3H12A    | 0.115382 |
| RPS6KA6    | 0.115316 |
| VPS26A     | 0.11529  |
| TBC1D30    | 0.115288 |
| SIGMAR1    | 0.115285 |
| CLDN4      | 0.115273 |
| TAF1A-AS1  | 0.115243 |
| RAB10      | 0.115214 |
| MED21      | 0.115178 |
| TRIM36     | 0.11499  |
| AP000759.1 | 0.114917 |
| FXR1       | 0.114858 |
| MORF4L1P1  | 0.11483  |
| AC145207.5 | 0.114808 |
| RPL3P2     | 0.114773 |
| RNA5SP18   | 0.11472  |
| AC098583.1 | 0.114708 |
| TMEM102    | 0.114698 |
| SPINT2     | 0.114584 |
| ANKLE2     | 0.114564 |
| TTC23      | 0.114558 |
| RPL14      | 0.114511 |
| TESC       | 0.114429 |
| ERI3       | 0.11442  |
| ARSD       | 0.114419 |
| AL358472.3 | 0.114385 |
| EEF1A1P12  | 0.114286 |
| RBPMS-AS1  | 0.114251 |
| UTP11      | 0.114215 |
| SNAPC2     | 0.114181 |
| NETO2      | 0.114117 |
| TSPAN3     | 0.114102 |
| TP53I3     | 0.11401  |
| ALS2CL     | 0.113952 |
| PUSL1      | 0.113917 |
| AKR1C3     | 0.113872 |
| DUS4L      | 0.113849 |
| RPA1       | 0.113822 |
| GAS5       | 0.113819 |
| EIF3J      | 0.113809 |
| CXCL16     | 0.11377  |
| PIGT       | 0.113723 |
| ELOB       | 0.113669 |
| NELFA      | 0.113593 |
| PHC2       | 0.113574 |
| KLC4       | 0.113526 |

|            |          |
|------------|----------|
| AC107075.1 | 0.113521 |
| MYBBP1A    | 0.113442 |
| B4GALT5    | 0.113424 |
| RBFOX2     | 0.113384 |
| PYGO2      | 0.11333  |
| NOS1AP     | 0.113248 |
| CCDC85B    | 0.113242 |
| AC007406.3 | 0.113231 |
| PLA2G1B    | 0.113195 |
| LINC02608  | 0.113149 |
| SLC25A1    | 0.113055 |
| PPP1R1B    | 0.113043 |
| RASA4CP    | 0.113016 |
| DDX1       | 0.112941 |
| NCAPD2     | 0.112917 |
| NEO1       | 0.112898 |
| MAEA       | 0.112854 |
| LINC00578  | 0.112842 |
| ECE1       | 0.112799 |
| UMPS       | 0.112799 |
| VARs2      | 0.11268  |
| DDX21      | 0.112658 |
| CENPQ      | 0.112576 |
| ZFPL1      | 0.112506 |
| SCAMP3     | 0.112365 |
| KALRN      | 0.112365 |
| TNC        | 0.11228  |
| LINC01521  | 0.112213 |
| HOMER2     | 0.112176 |
| ARRDC3     | 0.112174 |
| AC136632.1 | 0.11217  |
| RXRA       | 0.112134 |
| SUMF1      | 0.112128 |
| UHRF1      | 0.112124 |
| TMEM59     | 0.111929 |
| AC009245.1 | 0.111911 |
| LINC02575  | 0.111874 |
| WDR3       | 0.111836 |
| NOLC1      | 0.111804 |
| TCTN3      | 0.111671 |
| CDC42EP3   | 0.111668 |
| ERCC2      | 0.111639 |
| AC026401.3 | 0.111567 |
| TNFAIP1    | 0.111529 |
| TSR3       | 0.111509 |
| QPRT       | 0.111443 |
| AC079140.3 | 0.111421 |
| ATIC       | 0.111388 |
| SMIM13     | 0.111384 |

|            |          |
|------------|----------|
| AC131235.1 | 0.111346 |
| RAB1B      | 0.111342 |
| BSG        | 0.11134  |
| CAPN1      | 0.111195 |
| GTF3C2     | 0.111127 |
| NPTN       | 0.111093 |
| ARF3       | 0.111083 |
| RAB11A     | 0.11107  |
| PLCD1      | 0.111054 |
| MAPK6      | 0.111048 |
| SRP68      | 0.111035 |
| MRPS18A    | 0.111014 |
| ZFAND3     | 0.110881 |
| XRCC4      | 0.110824 |
| PXMP2      | 0.110805 |
| CLIP2      | 0.110786 |
| TTC23L-AS1 | 0.110733 |
| PMPCB      | 0.110719 |
| RASA1      | 0.110695 |
| GOLPH3L    | 0.11067  |
| RTL6       | 0.110662 |
| TRAM2-AS1  | 0.110651 |
| DERA       | 0.110523 |
| PPP1R35    | 0.110511 |
| RPL7AP66   | 0.110491 |
| C7orf50    | 0.11042  |
| TYMS       | 0.110363 |
| RXYLT1     | 0.110231 |
| ZNF425     | 0.110153 |
| UBAP2L     | 0.110148 |
| RPL7P23    | 0.110054 |
| CENPX      | 0.110023 |
| CTSH       | 0.110022 |
| THBD       | 0.109919 |
| GNA15      | 0.109916 |
| TCFL5      | 0.109886 |
| CLIC1      | 0.109836 |
| RPL13AP5   | 0.109809 |
| HRCT1      | 0.109803 |
| WDR43      | 0.109801 |
| UACA       | 0.10976  |
| BARX1      | 0.109727 |
| SH3YL1     | 0.109719 |
| AL355802.3 | 0.109711 |
| TRIM28     | 0.109705 |
| SDHA       | 0.109638 |
| MZT2A      | 0.109565 |
| RAB38      | 0.109524 |
| H2BC4      | 0.109455 |

|            |          |
|------------|----------|
| ZNRD2      | 0.109438 |
| UBQLN4     | 0.109424 |
| EPS8L2     | 0.109311 |
| ANO10      | 0.109308 |
| BAHD1      | 0.109283 |
| WIPI2      | 0.109236 |
| AKIRIN1    | 0.109185 |
| NME3       | 0.109093 |
| CTDSPL     | 0.109093 |
| SLMAP      | 0.10909  |
| ADORA1     | 0.109087 |
| HMBS       | 0.108994 |
| CGN        | 0.108969 |
| PSMD11     | 0.10893  |
| MFF        | 0.10888  |
| AC011497.2 | 0.108853 |
| PTCD1      | 0.108771 |
| CTSL       | 0.108767 |
| ATPCKMT    | 0.1087   |
| HMG20B     | 0.108699 |
| RAP2B      | 0.108601 |
| SHC3       | 0.108582 |
| RPS27AP16  | 0.108574 |
| EXT1       | 0.108558 |
| NCLN       | 0.108531 |
| SNRPC      | 0.108446 |
| SHF        | 0.108391 |
| TST        | 0.108385 |
| SVIL       | 0.108362 |
| NOL11      | 0.108342 |
| ADRA2C     | 0.108286 |
| TMEM191A   | 0.108274 |
| TMEM184A   | 0.108255 |
| TMEM69     | 0.108247 |
| AC132219.2 | 0.108236 |
| IPPK       | 0.108195 |
| PINK1      | 0.108159 |
| CCNJL      | 0.108149 |
| NDUFS5     | 0.108082 |
| UBE2S      | 0.108075 |
| MEX3D      | 0.107934 |
| MRPL12     | 0.107898 |
| PKMYT1     | 0.107825 |
| MAST2      | 0.107809 |
| AC007683.1 | 0.107782 |
| CNN3       | 0.107769 |
| EI24       | 0.107761 |
| MON1A      | 0.107714 |
| RPL5P34    | 0.107652 |



|             |          |
|-------------|----------|
| CDK14       | 0.107604 |
| TPT1P6      | 0.107558 |
| SLC25A13    | 0.107521 |
| CTF1        | 0.107428 |
| ADAM8       | 0.107374 |
| JCAD        | 0.107338 |
| LAMTOR2     | 0.107244 |
| GCNT2       | 0.107156 |
| VASP        | 0.107133 |
| CD36        | 0.107114 |
| FAM222B     | 0.107043 |
| COPS2       | 0.107035 |
| TMEM254-AS1 | 0.106973 |
| SLC29A1     | 0.106931 |
| ZBTB42      | 0.106872 |
| SEC14L6     | 0.106867 |
| TESMIN      | 0.106859 |
| CENPA       | 0.106852 |
| TRIM45      | 0.106764 |
| CENPO       | 0.106685 |
| CCT4        | 0.1066   |
| MANBAL      | 0.106582 |
| ENTPD7      | 0.106569 |
| DHX33       | 0.106561 |
| GART        | 0.106521 |
| FAM3C2P     | 0.106512 |
| KRT10       | 0.106467 |
| SMG5        | 0.10641  |
| PIMREG      | 0.106403 |
| HNRNPUP1    | 0.106384 |
| CKB         | 0.106317 |
| EXOC6B      | 0.106247 |
| BPGM        | 0.106244 |
| SLC1A1      | 0.106208 |
| CCDC51      | 0.106167 |
| DROSHA      | 0.10616  |
| PMVK        | 0.106096 |
| BPIFA2      | 0.106094 |
| MAD2L2      | 0.106057 |
| XRCC6       | 0.106029 |
| CCDC86      | 0.106008 |
| DUSP6       | 0.10596  |
| SEC22B      | 0.105926 |
| OGFOD3      | 0.105908 |
| TMEM9       | 0.105894 |
| ATG9A       | 0.105889 |
| LRRC41      | 0.105868 |
| RNF5        | 0.105866 |
| PFN2        | 0.105837 |

|            |          |
|------------|----------|
| BMP2       | 0.105808 |
| PIGV       | 0.105789 |
| GCN1       | 0.105762 |
| MRPS27     | 0.105566 |
| SERBP1     | 0.105566 |
| PPIAP22    | 0.105561 |
| NRBP1      | 0.105527 |
| AL844908.1 | 0.105407 |
| FSTL4      | 0.105346 |
| CARD10     | 0.105329 |
| LYRM4      | 0.10532  |
| METTL2B    | 0.105287 |
| CCDC34     | 0.105237 |
| C4orf48    | 0.105118 |
| GLMP       | 0.105113 |
| RPS23P8    | 0.105078 |
| GAPLINC    | 0.105073 |
| LRRN1      | 0.105039 |
| F5         | 0.105013 |
| NLGN2      | 0.104983 |
| ANP32A     | 0.104968 |
| TIPIN      | 0.104955 |
| TMEM14C    | 0.104934 |
| ATP2B1     | 0.104932 |
| MNT        | 0.104901 |
| E2F3       | 0.104895 |
| CSRP1      | 0.104814 |
| MAP7D1     | 0.104694 |
| ZC3HC1     | 0.104541 |
| FXR2       | 0.104534 |
| RPL35P2    | 0.104511 |
| TMEM245    | 0.104507 |
| GMNN       | 0.104501 |
| WDR46      | 0.104397 |
| PDXK       | 0.104375 |
| TOM1L1     | 0.104369 |
| DOK7       | 0.104339 |
| UBE2K      | 0.104257 |
| AP3S2      | 0.10425  |
| FAM155B    | 0.104217 |
| IMP4       | 0.104203 |
| MMD        | 0.104181 |
| POFUT1     | 0.104162 |
| AC027309.2 | 0.104144 |
| PRPF8      | 0.104125 |
| FAM90A1    | 0.104111 |
| AL117328.1 | 0.104103 |
| TRAF4      | 0.104039 |
| RCE1       | 0.104037 |

|             |          |
|-------------|----------|
| MRPS2       | 0.103937 |
| PRELID1P1   | 0.103922 |
| ATP5MC2     | 0.103914 |
| PSKH1       | 0.103829 |
| PPP1R11     | 0.103769 |
| PHF14       | 0.103765 |
| MALL        | 0.103714 |
| PIP5K1A     | 0.103689 |
| CDC42BPG    | 0.10368  |
| AC034102.1  | 0.103645 |
| RPS4Y1      | 0.103622 |
| RGL2        | 0.103502 |
| ZNF268      | 0.103489 |
| CNKSR1      | 0.103478 |
| CAMK2G      | 0.10344  |
| MUC1        | 0.103402 |
| POSTN       | 0.103349 |
| VAMP3       | 0.103326 |
| RPL29       | 0.103264 |
| TMBIM6      | 0.10312  |
| FKBP9       | 0.103117 |
| DMKN        | 0.103113 |
| MAP3K14-AS1 | 0.103111 |
| CXXC5       | 0.103099 |
| SPTLC3      | 0.103057 |
| NR2F6       | 0.103048 |
| ATF1        | 0.102965 |
| TAF12       | 0.102901 |
| ZNF598      | 0.102889 |
| DLGAP1-AS1  | 0.102834 |
| SNHG19      | 0.102832 |
| RNF11       | 0.10282  |
| MAD2L1BP    | 0.102728 |
| LDHAP4      | 0.102719 |
| ELOVL1      | 0.102709 |
| AL354920.1  | 0.102707 |
| PIK3CD-AS2  | 0.102682 |
| AP001542.3  | 0.102682 |
| MALSU1      | 0.102655 |
| PRKCI       | 0.102591 |
| NEDD4L      | 0.102545 |
| GLS         | 0.102539 |
| P3H1        | 0.102407 |
| PTPRG       | 0.102209 |
| TRIM4       | 0.102163 |
| EML2        | 0.102086 |
| EPN1        | 0.102039 |
| MASTL       | 0.101999 |
| PCDHB14     | 0.101928 |

|            |          |
|------------|----------|
| IRAK1      | 0.101928 |
| TEAD1      | 0.101846 |
| BTF3       | 0.101804 |
| WWC2       | 0.101801 |
| NPLOC4     | 0.101796 |
| TAGLN2P1   | 0.101749 |
| PTMAP4     | 0.101708 |
| OSBPL9     | 0.101697 |
| ZC3HAV1L   | 0.101685 |
| TSPAN9     | 0.101675 |
| BTF3L4P2   | 0.101671 |
| CEACAM19   | 0.101638 |
| SWI5       | 0.101618 |
| CCDC149    | 0.101592 |
| CDC5L      | 0.101551 |
| S100A13    | 0.101509 |
| MAN2B2     | 0.101458 |
| KCTD14     | 0.101457 |
| FAM3C      | 0.101424 |
| RSL1D1     | 0.101413 |
| ABL1       | 0.101399 |
| TSC22D4    | 0.101396 |
| PLA2G12A   | 0.101328 |
| AL713965.1 | 0.101241 |
| CDK2       | 0.101235 |
| NMD3       | 0.101158 |
| PSMD12     | 0.101134 |
| CSNK1E     | 0.101128 |
| C11orf68   | 0.101106 |
| COPB2      | 0.100945 |
| TNS2       | 0.100905 |
| LASP1      | 0.100878 |
| ABHD4      | 0.100704 |
| LINC01589  | 0.100639 |
| MACROH2A2  | 0.100629 |
| F12        | 0.100589 |
| PCDH12     | 0.100582 |
| MYL6B      | 0.10056  |
| KLF11      | 0.100448 |
| BRAT1      | 0.100444 |
| MFSD10     | 0.100391 |
| PSMC2      | 0.100384 |
| MRPL3      | 0.100357 |
| AGPAT1     | 0.100327 |
| ARHGEF34P  | 0.100277 |
| SLC44A2    | 0.100243 |
| PRRG1      | 0.100228 |
| FAF2       | 0.100228 |
| AC119150.1 | 0.100224 |

|            |          |
|------------|----------|
| FTH1P8     | 0.100221 |
| FOXS1      | 0.100198 |
| HDAC11     | 0.100171 |
| CCDC58     | 0.100108 |
| ERF        | 0.100071 |
| RAI1       | 0.100006 |
| LRPPRC     | 0.100003 |
| RPL13AP7   | 0.099972 |
| EMC6       | 0.099943 |
| PAIP1      | 0.099933 |
| ARL6IP6    | 0.099882 |
| HSPB1      | 0.099853 |
| PEDS1      | 0.099828 |
| MMADHC     | 0.099828 |
| SAPCD2     | 0.099778 |
| CRELD1     | 0.099701 |
| H2AX       | 0.099607 |
| DDIT4L     | 0.099584 |
| ARSL       | 0.099481 |
| LINC00853  | 0.099406 |
| ASL        | 0.099379 |
| DTX2       | 0.099328 |
| TATDN1     | 0.099309 |
| PPIL1      | 0.099286 |
| GPD2       | 0.099274 |
| NGRN       | 0.099265 |
| GLI2       | 0.09926  |
| RNU6-137P  | 0.099249 |
| MAP2K1     | 0.099238 |
| NDNF       | 0.099197 |
| WDR44      | 0.099187 |
| CRAT       | 0.099179 |
| ADAM10     | 0.099145 |
| S100A11    | 0.09912  |
| LHFPL4     | 0.099118 |
| AC125494.2 | 0.099094 |
| GABRB3     | 0.098972 |
| PLP2       | 0.098955 |
| TMTC4      | 0.098946 |
| AL589765.4 | 0.098942 |
| KIAA1191   | 0.098938 |
| ORMDL2     | 0.098932 |
| CNIH3      | 0.098922 |
| BCR        | 0.098858 |
| HSPA4      | 0.09884  |
| ALDH6A1    | 0.098826 |
| CRYZ       | 0.098824 |
| COL8A2     | 0.09882  |
| FBLIM1     | 0.098785 |

|            |          |
|------------|----------|
| KIF18A     | 0.098755 |
| DCHS1      | 0.09869  |
| AC130689.1 | 0.098684 |
| RHPN2      | 0.098623 |
| AC005912.1 | 0.098613 |
| GAR1       | 0.098548 |
| FAM234A    | 0.098537 |
| CLTRN      | 0.098526 |
| VSIG2      | 0.098487 |
| PCDHGA10   | 0.098456 |
| ETV5       | 0.098425 |
| GUCY1B2    | 0.098392 |
| RARRES1    | 0.098371 |
| DARS1      | 0.098352 |
| ATN1       | 0.098346 |
| LINC00886  | 0.098338 |
| AKT1S1     | 0.09833  |
| PITPNA-AS1 | 0.098259 |
| B3GNT9     | 0.098173 |
| SNRPD2     | 0.098118 |
| PFKM       | 0.098111 |
| COPG1      | 0.098077 |
| YWHAZP3    | 0.098064 |
| ZNF277     | 0.09805  |
| PRIM2      | 0.097985 |
| WASF1      | 0.097971 |
| RBP4       | 0.097929 |
| TSACC      | 0.097892 |
| SRC        | 0.097834 |
| STT3A      | 0.097817 |
| AL354892.2 | 0.097813 |
| AC007996.1 | 0.097792 |
| ADAMTS4    | 0.097718 |
| BICDL1     | 0.097688 |
| HSPA8      | 0.097622 |
| MGAT4B     | 0.097567 |
| TXNRD2     | 0.097559 |
| AC073389.3 | 0.097557 |
| TEKT4P2    | 0.097518 |
| KCTD2      | 0.097426 |
| AL158206.1 | 0.097345 |
| TMEM33     | 0.097298 |
| MPZL3      | 0.097258 |
| KIF18B     | 0.097178 |
| TNKS1BP1   | 0.09714  |
| SYT8       | 0.097121 |
| GAREM1     | 0.097054 |
| SH2D4A     | 0.096997 |
| RCCD1      | 0.096993 |

|            |          |
|------------|----------|
| VNN1       | 0.096972 |
| BTBD2      | 0.096971 |
| RNF215     | 0.096967 |
| REEP3      | 0.096938 |
| TMEM120B   | 0.096925 |
| HDLBP      | 0.096865 |
| AC017074.1 | 0.096852 |
| NAXD       | 0.096846 |
| SCARA3     | 0.096835 |
| ZNF622     | 0.096784 |
| TAX1BP1    | 0.096758 |
| FAM98A     | 0.096753 |
| AC005332.5 | 0.096727 |
| SHROOM1    | 0.096677 |
| MEA1       | 0.096546 |
| CLDN15     | 0.096501 |
| AC026368.1 | 0.096491 |
| DGCR2      | 0.096448 |
| MLST8      | 0.096396 |
| ST7        | 0.096326 |
| FAM210A    | 0.09632  |
| MCCC1      | 0.096311 |
| SH3BP5L    | 0.0963   |
| OR7E7P     | 0.09627  |
| FAM83E     | 0.096245 |
| TRIM47     | 0.096221 |
| PARD3-AS1  | 0.096164 |
| RAD23B     | 0.096163 |
| SLC26A9    | 0.096149 |
| TMEM106B   | 0.096132 |
| NEK2       | 0.096087 |
| NUP153-AS1 | 0.09607  |
| YBX3       | 0.095981 |
| RELL1      | 0.09595  |
| NOP14-AS1  | 0.095875 |
| GFUS       | 0.095863 |
| GPKOW      | 0.095851 |
| SRF        | 0.09585  |
| CBX4       | 0.095789 |
| BABAM2     | 0.095754 |
| SPTLC1     | 0.095748 |
| RFX1       | 0.095713 |
| DAB2IP     | 0.095693 |
| PDK2       | 0.0956   |
| ZNF687-AS1 | 0.095573 |
| YIF1A      | 0.095556 |
| TMEM181    | 0.095534 |
| PARVA      | 0.095522 |
| LMTK3      | 0.095479 |

|            |          |
|------------|----------|
| FGD1       | 0.095473 |
| TMEM91     | 0.095447 |
| COPA       | 0.095435 |
| CLEC11A    | 0.095407 |
| RPL10A     | 0.095302 |
| MAL2       | 0.095284 |
| KCTD5      | 0.095231 |
| OTUB2      | 0.095227 |
| ING2       | 0.095204 |
| CDH1       | 0.095164 |
| CYP51A1    | 0.095151 |
| SEPTIN3    | 0.095089 |
| LCN12      | 0.095084 |
| OLA1       | 0.095055 |
| LAYN       | 0.094966 |
| WFS1       | 0.094965 |
| NCKAP1     | 0.094964 |
| SFTA2      | 0.094952 |
| TPT1P9     | 0.094929 |
| AL034379.1 | 0.094908 |
| RING1      | 0.094866 |
| OLFML2B    | 0.09484  |
| TOM1       | 0.094806 |
| RNU2-27P   | 0.094798 |
| TBRG4      | 0.094792 |
| LYPLA2     | 0.094681 |
| RPAP1      | 0.094649 |
| CHCHD2P9   | 0.094607 |
| RCC1L      | 0.094597 |
| FAT1       | 0.094588 |
| ZWINT      | 0.094558 |
| TMEM11     | 0.094479 |
| EEF1A1P9   | 0.094443 |
| SRRM3      | 0.094402 |
| CBX3       | 0.094397 |
| AC139149.1 | 0.094372 |
| ZFPM2-AS1  | 0.094301 |
| RRP9       | 0.09419  |
| BLZF1      | 0.094102 |
| NUDT15     | 0.094092 |
| NDUFAF2P1  | 0.094017 |
| CASP9      | 0.093968 |
| ID1        | 0.093918 |
| RPH3AL     | 0.093906 |
| RRS1       | 0.093882 |
| FAM86C2P   | 0.093873 |
| GALNT11    | 0.093834 |
| RABL3      | 0.093777 |
| JAGN1      | 0.093762 |



|            |          |
|------------|----------|
| ADAM12     | 0.093755 |
| PTGFRN     | 0.093737 |
| MRPL10     | 0.093611 |
| CDCA7L     | 0.093604 |
| RPUSD4     | 0.093587 |
| TNPO1      | 0.093549 |
| PGLS       | 0.093519 |
| RPS15AP1   | 0.093506 |
| SMIM22     | 0.093506 |
| RPRD2      | 0.093499 |
| NEXN       | 0.093498 |
| PPIA       | 0.093465 |
| KCMF1      | 0.093401 |
| MARK4      | 0.09339  |
| GPR4       | 0.09336  |
| RARS1      | 0.093345 |
| OXSR1      | 0.093334 |
| NPM1       | 0.093323 |
| VPS18      | 0.093301 |
| PA2G4      | 0.093261 |
| MAPK7      | 0.093254 |
| NDUFS6     | 0.09321  |
| FDX1       | 0.093195 |
| RPL22P24   | 0.09313  |
| AL122023.1 | 0.093059 |
| MCUR1      | 0.092974 |
| RRP1B      | 0.092959 |
| H6PD       | 0.092918 |
| ACSL4      | 0.092889 |
| AP1M2      | 0.092812 |
| THNSL1     | 0.092775 |
| RUSF1      | 0.092768 |
| AC121338.2 | 0.09275  |
| SIRT7      | 0.092727 |
| AC114810.1 | 0.092701 |
| DDAH1      | 0.092669 |
| WDR76      | 0.092611 |
| PES1       | 0.092591 |
| RPS27AP11  | 0.09258  |
| CRADD      | 0.092579 |
| BTBD6      | 0.092571 |
| TREM1      | 0.092553 |
| GCC1       | 0.09255  |
| GOLGA2     | 0.092547 |
| SEPTIN9    | 0.092538 |
| TPM3       | 0.092527 |
| TIMELESS   | 0.092479 |
| NACA       | 0.092474 |
| RASSF3     | 0.092456 |

|            |          |
|------------|----------|
| KIFBP      | 0.09245  |
| ARHGEF10   | 0.092431 |
| SELENBP1   | 0.092402 |
| COASY      | 0.092366 |
| PPP3CA     | 0.092287 |
| SFRP4      | 0.092226 |
| AL513534.2 | 0.092218 |
| AAMP       | 0.092206 |
| SAMD14     | 0.092196 |
| ZNF385C    | 0.092193 |
| DNAJC14    | 0.092187 |
| ADGRG1     | 0.092184 |
| ZYX        | 0.092136 |
| TNPO3      | 0.092124 |
| APH1A      | 0.092081 |
| RPS3AP20   | 0.09206  |
| CASP6      | 0.09203  |
| AC004846.1 | 0.092004 |
| ATP2C2     | 0.091958 |
| LANCL2     | 0.091871 |
| AP003469.2 | 0.091852 |
| SNHG15     | 0.091815 |
| MOB3B      | 0.091799 |
| PSMC5      | 0.091771 |
| UBXN8      | 0.091754 |
| MLF2       | 0.091736 |
| ATP5F1B    | 0.091718 |
| NEDD9      | 0.091692 |
| BHMT2      | 0.091678 |
| KDM1A      | 0.091652 |
| RPL36A     | 0.091636 |
| AL162595.1 | 0.091623 |
| PEX10      | 0.091599 |
| ILF2       | 0.091598 |
| DGCR11     | 0.091588 |
| ZBTB11-AS1 | 0.09155  |
| PLBD2      | 0.091547 |
| SNUPN      | 0.091511 |
| PYGB       | 0.091475 |
| RPS2       | 0.091465 |
| FTH1       | 0.091461 |
| LIF        | 0.091424 |
| PWWP2B     | 0.091388 |
| EIF3I      | 0.09138  |
| AP000892.4 | 0.091344 |
| TULP3      | 0.091324 |
| SF3A3      | 0.091306 |
| EIF2AK4    | 0.09121  |
| LINC02693  | 0.091131 |

|            |          |
|------------|----------|
| AC026369.2 | 0.091128 |
| ZKSCAN3    | 0.091099 |
| SPINDOC    | 0.091026 |
| ERGIC2     | 0.091013 |
| TMEM101    | 0.091009 |
| CDIN1      | 0.091004 |
| RTF1       | 0.09088  |
| NF2        | 0.090874 |
| EMC4       | 0.090822 |
| PI4KB      | 0.09078  |
| MIR4263    | 0.090753 |
| AC093323.1 | 0.090741 |
| DEPDC1B    | 0.090701 |
| AC022364.1 | 0.090682 |
| PSMB6      | 0.090671 |
| UAP1       | 0.090657 |
| SDC2       | 0.090556 |
| ADIPOR1    | 0.090521 |
| SMYD5      | 0.090519 |
| LAPTM4A    | 0.09041  |
| NCKIPSD    | 0.090297 |
| ETFB       | 0.090213 |
| RPS18      | 0.090057 |
| TSPO       | 0.089946 |
| TFPI       | 0.089839 |
| ZNF853     | 0.089695 |
| HDGFL3     | 0.089629 |
| TXNDC17    | 0.089613 |
| PCDHAC2    | 0.08961  |
| ACY1       | 0.089606 |
| IRF2BP1    | 0.089604 |
| ETNK2      | 0.089571 |
| KAZALD1    | 0.089506 |
| ACOT4      | 0.089496 |
| GALNT15    | 0.089458 |
| CAPN2      | 0.089439 |
| TUBGCP4    | 0.089378 |
| AC016582.2 | 0.089369 |
| DTYMK      | 0.089338 |
| CPNE2      | 0.089312 |
| SDF4       | 0.089264 |
| NR1D1      | 0.08926  |
| PFN4       | 0.089246 |
| NDUFB4     | 0.089232 |
| SELENOI    | 0.08922  |
| NUP88      | 0.089191 |
| DHX32      | 0.089178 |
| LINC01719  | 0.089164 |
| UBE3C      | 0.089122 |

|            |          |
|------------|----------|
| STIP1      | 0.089099 |
| IFT57      | 0.089059 |
| TMED4      | 0.089037 |
| RHOBTB2    | 0.089033 |
| PGK1       | 0.088973 |
| PEX12      | 0.088948 |
| JARID2     | 0.088944 |
| NECTIN2    | 0.088936 |
| FBXO45     | 0.088905 |
| COX6CP1    | 0.088892 |
| AKR7A2     | 0.088861 |
| ZW10       | 0.088851 |
| LINC00885  | 0.088841 |
| TIMM22     | 0.088825 |
| PBX3       | 0.088811 |
| RBM15B     | 0.088803 |
| SH2B2      | 0.088803 |
| AL590867.2 | 0.088765 |
| SMC3       | 0.088761 |
| RPS7P1     | 0.088719 |
| PATJ       | 0.088573 |
| SERPINB6   | 0.088488 |
| ST20-AS1   | 0.088437 |
| TLE1       | 0.088384 |
| PHB        | 0.088324 |
| LINC00863  | 0.088302 |
| NDEL1      | 0.088302 |
| YIPF5      | 0.088301 |
| RPL10P15   | 0.088294 |
| TDRKH      | 0.088278 |
| MZT2B      | 0.088233 |
| CPNE4      | 0.088225 |
| TMEM209    | 0.088205 |
| ZBTB7B     | 0.088194 |
| SLC22A5    | 0.088181 |
| TUBB4B     | 0.088146 |
| MARCKSL1   | 0.088144 |
| RALB       | 0.088092 |
| BNIP3      | 0.088032 |
| NHP2       | 0.088008 |
| TLCD1      | 0.087978 |
| MIR7111    | 0.087926 |
| AC022034.1 | 0.087906 |
| TCP1       | 0.087884 |
| POLR2L     | 0.087869 |
| CDR2       | 0.087789 |
| DNM1L      | 0.087788 |
| STMP1      | 0.087766 |
| LDOC1      | 0.087759 |

|            |          |
|------------|----------|
| F11R       | 0.087713 |
| PRELID1P5  | 0.087657 |
| EEF2KMT    | 0.087654 |
| NRM        | 0.087626 |
| PHAX       | 0.087508 |
| ZNF579     | 0.087484 |
| BGN        | 0.087436 |
| CASKIN2    | 0.08742  |
| BLM        | 0.087399 |
| DACT3      | 0.087366 |
| ATP10A     | 0.08732  |
| AL136380.1 | 0.087317 |
| DNMBP      | 0.08728  |
| FTH1P12    | 0.087259 |
| RGS3       | 0.087256 |
| PLPBP      | 0.08725  |
| LINC01564  | 0.087229 |
| RCOR2      | 0.0872   |
| CEBPA      | 0.087135 |
| BCL2L13    | 0.087112 |
| TTC7A      | 0.087077 |
| SPATA5     | 0.087076 |
| BICD1      | 0.087061 |
| CCDC137    | 0.087027 |
| TFE3       | 0.087007 |
| SNX21      | 0.086969 |
| EIF3A      | 0.086957 |
| FUT11      | 0.086941 |
| ULBP1      | 0.086902 |
| CABLES2    | 0.086894 |
| SMG8       | 0.086846 |
| KPNA3      | 0.086812 |
| SLC44A5    | 0.086758 |
| AC067852.2 | 0.086699 |
| CCN2       | 0.086614 |
| NLRX1      | 0.086602 |
| FZD5       | 0.086592 |
| PLS3       | 0.08657  |
| VIM        | 0.086554 |
| UBL4A      | 0.086553 |
| CHCHD3     | 0.086523 |
| IMP3       | 0.086498 |
| SAR1A      | 0.086478 |
| IL31RA     | 0.08646  |
| MAFG       | 0.086404 |
| LRRK2      | 0.086377 |
| TBCAP1     | 0.086369 |
| TMEM256    | 0.086308 |
| PCSK5      | 0.086296 |

|            |          |
|------------|----------|
| DDA1       | 0.086294 |
| GFER       | 0.08625  |
| EDC3       | 0.086241 |
| MAGED2     | 0.086222 |
| AARS2      | 0.086162 |
| RPL15      | 0.086126 |
| WASF2      | 0.086117 |
| CENPH      | 0.086091 |
| RELA       | 0.086091 |
| SMUG1      | 0.086023 |
| RALBP1     | 0.08602  |
| KIF4A      | 0.086015 |
| RPL39P3    | 0.085971 |
| IMPA2      | 0.085968 |
| STMN1      | 0.085938 |
| ACSL3      | 0.085921 |
| SPDL1      | 0.085908 |
| ZKSCAN5    | 0.085863 |
| UBQLN2     | 0.085858 |
| DMWD       | 0.085825 |
| MRPL36     | 0.085815 |
| COMMD4     | 0.085763 |
| IPO5       | 0.085756 |
| KCND1      | 0.085741 |
| SLC39A11   | 0.085678 |
| SLC37A3    | 0.085579 |
| AC034213.1 | 0.085576 |
| GTF2A2     | 0.085538 |
| EVC        | 0.085521 |
| ANKMY2     | 0.085511 |
| FBXO22     | 0.085501 |
| RIOK1      | 0.085501 |
| REEP6      | 0.085495 |
| RPL22L1    | 0.08548  |
| TECRP1     | 0.08546  |
| AL121944.1 | 0.085413 |
| FBXW8      | 0.085379 |
| UNG        | 0.085353 |
| AL353150.1 | 0.085316 |
| AK1        | 0.085259 |
| PHETA2     | 0.085254 |
| AC106028.3 | 0.085251 |
| AC017100.1 | 0.085236 |
| ACTL6A     | 0.085222 |
| SPACA4     | 0.085186 |
| ILK        | 0.085085 |
| NUBP2      | 0.084962 |
| MRPL28     | 0.084949 |
| KCNK5      | 0.084887 |

|            |          |
|------------|----------|
| FIBIN      | 0.084885 |
| DAP3       | 0.084858 |
| AC005255.1 | 0.084826 |
| MBTPS2     | 0.084818 |
| KPNA6      | 0.084807 |
| IVD        | 0.08478  |
| SLC44A4    | 0.084725 |
| RILP       | 0.084675 |
| UBE2G1     | 0.084671 |
| MICAL3     | 0.084631 |
| TMED7      | 0.084628 |
| AL035446.1 | 0.084591 |
| POMZP3     | 0.084588 |
| THY1       | 0.084579 |
| AC008429.2 | 0.084555 |
| HDAC7      | 0.084553 |
| SLC7A5     | 0.084538 |
| GALE       | 0.084503 |
| EVPL       | 0.084479 |
| SLC35E1    | 0.084469 |
| SLC16A2    | 0.084453 |
| ZSCAN2     | 0.08442  |
| TBL2       | 0.084385 |
| ECT2       | 0.084385 |
| RUVBL1     | 0.084383 |
| RPL39P15   | 0.084375 |
| FDPS       | 0.084355 |
| AC011479.1 | 0.084324 |
| CBX1       | 0.084218 |
| ABCF3      | 0.084207 |
| MORF4L1    | 0.084194 |
| RANBP9     | 0.084159 |
| MFSD5      | 0.084157 |
| SNAP29     | 0.084132 |
| NT5M       | 0.084114 |
| MMS19      | 0.084055 |
| DCBLD1     | 0.084046 |
| MED10      | 0.08402  |
| MACROD1    | 0.083967 |
| ZNF702P    | 0.083932 |
| NDUFAF2    | 0.083903 |
| DET1       | 0.083828 |
| PMF1       | 0.083807 |
| EGFL7      | 0.083785 |
| AL359715.3 | 0.083775 |
| GOLPH3     | 0.083769 |
| SNRNP40    | 0.083722 |
| TSPAN2     | 0.083684 |
| CISD3      | 0.083669 |

|            |          |
|------------|----------|
| STK35      | 0.083664 |
| ENDOV      | 0.083638 |
| ITPRIPL2   | 0.083625 |
| SOWAHB     | 0.083615 |
| AP2A1      | 0.083614 |
| SLC4A1AP   | 0.083519 |
| LRP12      | 0.083494 |
| ZNF282     | 0.083489 |
| KCTD3      | 0.083432 |
| CHTF8      | 0.083369 |
| TBL3       | 0.083368 |
| FGD6       | 0.083349 |
| PRCC       | 0.083247 |
| METAP2     | 0.083244 |
| ZNF3       | 0.083222 |
| MAPK13     | 0.083212 |
| DAPK3      | 0.083094 |
| DYNLL2     | 0.083068 |
| WDR86      | 0.083063 |
| AL450998.1 | 0.083017 |
| RTKN       | 0.082976 |
| AC092687.3 | 0.082973 |
| CARNMT1    | 0.082962 |
| NME7       | 0.082923 |
| ZNF415     | 0.082917 |
| MICALL2    | 0.082889 |
| VDAC1      | 0.082831 |
| MYCBP      | 0.082829 |
| AC099509.1 | 0.082815 |
| FAM131A    | 0.082752 |
| SH3D21     | 0.082741 |
| LANCL1     | 0.082707 |
| DDX11      | 0.082662 |
| AC138649.1 | 0.08266  |
| EIF4B      | 0.082586 |
| PSME3      | 0.082584 |
| PDIA6      | 0.082578 |
| SOGA1      | 0.082569 |
| MIDN       | 0.082564 |
| DDT        | 0.082469 |
| DALRD3     | 0.082463 |
| KIAA1586   | 0.082458 |
| EIF2AK1    | 0.082446 |
| PHLDA3     | 0.082388 |
| SNRPE      | 0.082384 |
| SLC25A3    | 0.082368 |
| PGGHG      | 0.082321 |
| CCNE1      | 0.082314 |
| LDHAP3     | 0.082298 |



|            |          |
|------------|----------|
| ZMPSTE24   | 0.082298 |
| EIF3FP3    | 0.082208 |
| PPFIA4     | 0.082101 |
| ZNF362     | 0.082069 |
| PXDC1      | 0.082058 |
| UQCRC1     | 0.082011 |
| AL450124.1 | 0.081999 |
| AC089983.1 | 0.081988 |
| MPDU1      | 0.081933 |
| CORO1C     | 0.081928 |
| MPZL1      | 0.081874 |
| CEBPZ      | 0.081792 |
| NIPA2      | 0.081724 |
| PRXL2A     | 0.081696 |
| IL6        | 0.081687 |
| ADSS2      | 0.081645 |
| AL161785.1 | 0.081603 |
| SNRPEP2    | 0.081595 |
| PDCD11     | 0.081593 |
| POFUT2     | 0.081519 |
| MIR200CHG  | 0.08149  |
| COL9A2     | 0.081478 |
| BLOC1S4    | 0.081469 |
| FTH1P23    | 0.081455 |
| TBL1X      | 0.081447 |
| RFLNB      | 0.081437 |
| AURKAIP1   | 0.081433 |
| RAN        | 0.081339 |
| NPM3       | 0.081325 |
| SAC3D1     | 0.081322 |
| MRFAP1     | 0.081305 |
| PEBP4      | 0.081295 |
| RPL32P16   | 0.081161 |
| DBNDD1     | 0.081126 |
| PRR13      | 0.081096 |
| BTF3L4     | 0.081062 |
| CYFIP1     | 0.081058 |
| LMNB1      | 0.081038 |
| EEF1DP1    | 0.081002 |
| TMEM14B    | 0.080982 |
| STMN3      | 0.080962 |
| CSNK1A1    | 0.080962 |
| RAMAC      | 0.080944 |
| TMEM250    | 0.080914 |
| ILVBL      | 0.080914 |
| DDX41      | 0.08091  |
| RFNG       | 0.080872 |
| RACK1      | 0.080824 |
| IPO9       | 0.080818 |

|            |          |
|------------|----------|
| PRUNE1     | 0.080813 |
| MKI67      | 0.080742 |
| C1QBP      | 0.08071  |
| PELI3      | 0.080694 |
| CDCA3      | 0.080636 |
| TRIM27     | 0.080607 |
| WDFY3-AS2  | 0.080514 |
| KATNBL1    | 0.080514 |
| CENPU      | 0.080477 |
| RAB43P1    | 0.080473 |
| ISM1       | 0.080469 |
| NFXL1      | 0.080453 |
| TMEM267    | 0.080414 |
| ASS1       | 0.08039  |
| ANO6       | 0.080368 |
| RPS17      | 0.080336 |
| SSBP1      | 0.080331 |
| KIF20B     | 0.08025  |
| ZNF131     | 0.080208 |
| MIR621     | 0.080177 |
| SLC3A2     | 0.080148 |
| BCL7A      | 0.080142 |
| CSNK2A1    | 0.08011  |
| BANF1P3    | 0.080093 |
| NBEAP2     | 0.080056 |
| THOC6      | 0.080049 |
| CATSPER2P1 | 0.080008 |
| CCNF       | 0.080006 |
| EIF5B      | 0.08     |
| SGO2       | 0.079969 |
| DHX57      | 0.07995  |
| PRRG2      | 0.079942 |
| UBE2O      | 0.079932 |
| AL603750.1 | 0.079913 |
| KATNAL1    | 0.079913 |
| CD248      | 0.079871 |
| CSTB       | 0.079862 |
| FAAP20     | 0.079834 |
| FBXW5      | 0.079832 |
| TRUB2      | 0.079813 |
| SLC30A6    | 0.079797 |
| CLOCK      | 0.079794 |
| EPCAM      | 0.079778 |
| F8A1       | 0.079753 |
| CDK7       | 0.079685 |
| HDDC2      | 0.079597 |
| BCL7B      | 0.079503 |
| SIGLEC6    | 0.079467 |
| CEP55      | 0.079461 |

|            |          |
|------------|----------|
| IQGAP1     | 0.079433 |
| KCNK6      | 0.079429 |
| C1orf109   | 0.079413 |
| ARF5       | 0.079392 |
| AC009549.1 | 0.079315 |
| BLCAP      | 0.07927  |
| PRELID2    | 0.079268 |
| SNX25P1    | 0.079263 |
| PRIM1      | 0.07922  |
| LENG9      | 0.079211 |
| PPRC1      | 0.079161 |
| GMPS       | 0.079125 |
| LGALS1     | 0.079124 |
| GPR107     | 0.079116 |
| DCST1-AS1  | 0.079112 |
| RAB13      | 0.079103 |
| FLRT3      | 0.079094 |
| TMEM222    | 0.079076 |
| PCBD1      | 0.07904  |
| DANCR      | 0.079035 |
| CDC42EP5   | 0.078999 |
| GCSH       | 0.078996 |
| SMPD4      | 0.078995 |
| NACC1      | 0.078993 |
| SEN8       | 0.078992 |
| MDFIC      | 0.078979 |
| F2R        | 0.078975 |
| SULT1A1    | 0.078931 |
| CD99       | 0.078915 |
| MAPK14     | 0.078905 |
| C5orf38    | 0.07889  |
| COPS7A     | 0.078882 |
| SERF2      | 0.07888  |
| PTPRK      | 0.07885  |
| RNF8       | 0.078799 |
| MEGF8      | 0.078683 |
| SEN3       | 0.078633 |
| SNAP47     | 0.07863  |
| TMEM200A   | 0.07862  |
| HPS6       | 0.078584 |
| PFKL       | 0.078582 |
| CRTC2      | 0.078573 |
| NOL7       | 0.07853  |
| TMEM164    | 0.078518 |
| SCAF1      | 0.078504 |
| MGLL       | 0.078493 |
| GPS1       | 0.078477 |
| GBF1       | 0.078461 |
| RPL10P3    | 0.07843  |

|            |          |
|------------|----------|
| ABCF2      | 0.078378 |
| CLCF1      | 0.078334 |
| NR4A3      | 0.078321 |
| SLC17A9    | 0.078262 |
| LINC01269  | 0.07825  |
| KNL1       | 0.078177 |
| FOXK2      | 0.078164 |
| NDUFS2     | 0.0781   |
| ARHGAP10   | 0.078099 |
| ZDHHC4     | 0.078089 |
| ZNF668     | 0.078089 |
| SLC9A1     | 0.078084 |
| RPL12P4    | 0.077991 |
| NLN        | 0.077985 |
| CBLC       | 0.07798  |
| ORC5       | 0.077966 |
| PDCD6      | 0.077966 |
| NAPEPLD    | 0.077943 |
| MSRB1      | 0.077872 |
| ZFAND1     | 0.077841 |
| EDARADD    | 0.077813 |
| ATP13A2    | 0.077737 |
| CREG1      | 0.077698 |
| AP000757.1 | 0.077638 |
| ALG1       | 0.077621 |
| SETD7      | 0.077601 |
| CACFD1     | 0.077597 |
| SNX24      | 0.077595 |
| EEF1AKNMT  | 0.077557 |
| OGDH       | 0.077522 |
| PLTP       | 0.077463 |
| FBLN2      | 0.077346 |
| C1QTNF2    | 0.077325 |
| DEXI       | 0.0773   |
| FAM200A    | 0.077294 |
| LINC01547  | 0.077281 |
| PDE9A      | 0.077197 |
| FAM174B    | 0.077139 |
| TKFC       | 0.077139 |
| RPL4       | 0.077139 |
| SLC6A9     | 0.077069 |
| BICDL2     | 0.07705  |
| CAMSAP3    | 0.07703  |
| DOLPP1     | 0.077028 |
| SBNO2      | 0.076995 |
| TCEA2      | 0.07686  |
| FAAH       | 0.07684  |
| CCN1       | 0.076822 |
| TM4SF19    | 0.076817 |

|            |          |
|------------|----------|
| CUTA       | 0.076773 |
| EME1       | 0.07672  |
| PRPSAP2    | 0.076685 |
| PAQR4      | 0.076661 |
| RPS25      | 0.076654 |
| WRNIP1     | 0.076653 |
| PSMB4      | 0.076607 |
| ZNF74      | 0.076592 |
| YTHDF1     | 0.07659  |
| COX10      | 0.076544 |
| ELF4       | 0.076509 |
| ATRAID     | 0.076497 |
| SELENOOLP  | 0.076493 |
| MMUT       | 0.07647  |
| PRAF2      | 0.07647  |
| SETDB1     | 0.076435 |
| GPANK1     | 0.076426 |
| SEC31A     | 0.076373 |
| B3GALT4    | 0.0763   |
| RASD1      | 0.076294 |
| IRAK2      | 0.076291 |
| ATRN       | 0.076227 |
| C6orf89    | 0.076206 |
| TAF1A      | 0.076192 |
| ARPP19     | 0.076183 |
| TIMM8A     | 0.076153 |
| CBX8       | 0.076107 |
| C15orf62   | 0.07609  |
| MRTO4      | 0.076089 |
| YRDC       | 0.076076 |
| BMT2       | 0.076049 |
| ACOX1      | 0.076044 |
| DRG2       | 0.076008 |
| EVI5L      | 0.07599  |
| MNX1       | 0.075975 |
| IQSEC2     | 0.075974 |
| RPL9P7     | 0.075956 |
| MTMR12     | 0.07594  |
| PTP4A2P1   | 0.075933 |
| LINC02588  | 0.075931 |
| AC022509.3 | 0.075928 |
| ZCCHC17    | 0.075899 |
| ACVR1      | 0.07587  |
| TM2D1      | 0.075853 |
| TARBP2     | 0.075825 |
| ACTR3B     | 0.075816 |
| SEC13      | 0.075759 |
| SLC25A23   | 0.075733 |
| ELFN2      | 0.07573  |

|            |          |
|------------|----------|
| SLC9A7     | 0.075718 |
| SAMM50     | 0.075694 |
| INHBB      | 0.075687 |
| PLD3       | 0.075659 |
| ZNF710     | 0.075649 |
| DHX16      | 0.075612 |
| RNF121     | 0.075568 |
| BAK1       | 0.075559 |
| MTND6P4    | 0.075505 |
| YTHDF2P1   | 0.075492 |
| SCAMP1     | 0.075475 |
| DCUN1D1    | 0.075456 |
| KCNMB2-AS1 | 0.075456 |
| CRACR2B    | 0.075433 |
| LDLR       | 0.075429 |
| MAP2K5     | 0.075418 |
| RNF220     | 0.075331 |
| TCEAL9     | 0.075286 |
| UBE4B      | 0.075252 |
| RARA-AS1   | 0.075213 |
| AL133216.2 | 0.075193 |
| IER5       | 0.075173 |
| EEF1GP1    | 0.075171 |
| ANAPC13    | 0.075168 |
| NDUFB2     | 0.075154 |
| CFL1       | 0.075105 |
| CECR2      | 0.075084 |
| AC007849.1 | 0.07507  |
| ZNF384     | 0.07507  |
| NCAM2      | 0.075061 |
| POR        | 0.074999 |
| ABCE1      | 0.074985 |
| AC112497.2 | 0.074963 |
| P3H4       | 0.074951 |
| UPP1       | 0.074949 |
| FTSJ3      | 0.074943 |
| RFT1       | 0.074836 |
| ECI2       | 0.074813 |
| MTHFD1L    | 0.074734 |
| SUPT3H     | 0.074643 |
| ISG20L2    | 0.07463  |
| CHST2      | 0.074542 |
| ADRM1      | 0.07454  |
| PGAP6      | 0.074511 |
| SRP9P1     | 0.07449  |
| FBXL19     | 0.074448 |
| MRPS28     | 0.074434 |
| PSMB2      | 0.074398 |
| FZD8       | 0.074321 |

|            |          |
|------------|----------|
| DVL3       | 0.074305 |
| TPCN1      | 0.074288 |
| FKBP14     | 0.074279 |
| ANXA5      | 0.074267 |
| FIGNL1     | 0.074254 |
| SKIV2L     | 0.074248 |
| AC023509.3 | 0.07423  |
| YES1       | 0.074203 |
| LINC02562  | 0.074177 |
| WBP11      | 0.074154 |
| RECQL      | 0.074114 |
| XKR8       | 0.074101 |
| CORO2A     | 0.074042 |
| PCAT6      | 0.07403  |
| ZSCAN12P1  | 0.073994 |
| TMEM182    | 0.073986 |
| UBXN2A     | 0.073986 |
| ZNF521     | 0.073971 |
| JRKL       | 0.073967 |
| KPNA1      | 0.073963 |
| RPP25      | 0.07395  |
| LCMT2      | 0.073942 |
| TMEM165    | 0.073935 |
| PPP1R14A   | 0.073932 |
| VAV2       | 0.073925 |
| SYTL4      | 0.073922 |
| CMSS1      | 0.073872 |
| MAZ        | 0.073807 |
| PDGFRB     | 0.073741 |
| NDRG3      | 0.073737 |
| KIAA2013   | 0.073729 |
| STEAP1     | 0.073697 |
| ZBTB47     | 0.073651 |
| MORF4L2    | 0.073639 |
| TMEM104    | 0.07359  |
| CCDC71     | 0.073537 |
| NOL10      | 0.073461 |
| MYH9       | 0.073435 |
| TRRAP      | 0.073431 |
| STK25      | 0.073419 |
| CSNK2B     | 0.073401 |
| RNVU1-1    | 0.073358 |
| NRP2       | 0.073348 |
| HECTD3     | 0.073323 |
| RICTOR     | 0.073299 |
| GLT1D1     | 0.07323  |
| ZFYVE21    | 0.073194 |
| CES2       | 0.073167 |
| RTN4RL2    | 0.073158 |

|            |          |
|------------|----------|
| KLHDC10    | 0.073152 |
| ADAL       | 0.073131 |
| NPEPPS     | 0.073102 |
| XYLT2      | 0.073097 |
| MIB1       | 0.073018 |
| YBX1       | 0.073017 |
| STEAP3     | 0.073009 |
| RPL12      | 0.072937 |
| GORASP2    | 0.072906 |
| AC091849.1 | 0.072888 |
| RPL13AP25  | 0.072869 |
| ZFP64      | 0.072831 |
| TMEM129    | 0.07282  |
| FIBP       | 0.072812 |
| PID1       | 0.072811 |
| DGCR6L     | 0.072737 |
| TMEM44     | 0.072708 |
| EXOC3      | 0.072704 |
| AC008966.1 | 0.072696 |
| ZNF628     | 0.072658 |
| RETSAT     | 0.072646 |
| EXOC1      | 0.072641 |
| AGA        | 0.072599 |
| LINC01186  | 0.072588 |
| PCNX3      | 0.072577 |
| VTCN1      | 0.072576 |
| ARHGEF18   | 0.072576 |
| METTL9     | 0.072544 |
| LINC02356  | 0.072533 |
| PLAC8      | 0.072464 |
| DHX37      | 0.072389 |
| GOT2       | 0.072381 |
| ANAPC11    | 0.072356 |
| CHPF2      | 0.072322 |
| GNB1L      | 0.072318 |
| FN3K       | 0.072293 |
| MICAL2     | 0.072284 |
| MPI        | 0.072281 |
| FAHD1      | 0.072259 |
| RIN2       | 0.072245 |
| FLT4       | 0.072244 |
| LNX1       | 0.072242 |
| TOP3A      | 0.07217  |
| TCAIM      | 0.072129 |
| MCM6       | 0.072097 |
| ACADS      | 0.072083 |
| CLU        | 0.07208  |
| TJP2       | 0.072049 |
| MRM3       | 0.072047 |



|            |          |
|------------|----------|
| DLGAP5     | 0.072039 |
| PNPLA8     | 0.072035 |
| ZNF770     | 0.072026 |
| PTPN12     | 0.072025 |
| AC079610.1 | 0.07202  |
| AVL9       | 0.072015 |
| SMARCA1    | 0.07195  |
| CHMP1B     | 0.071926 |
| TMEM214    | 0.071923 |
| EXOSC5     | 0.07186  |
| RHBDF1     | 0.071849 |
| PLEKHG4    | 0.071827 |
| AL136304.1 | 0.071826 |
| LSM4       | 0.071818 |
| FRG1BP     | 0.071768 |
| HOXA3      | 0.071753 |
| TRMT10C    | 0.07173  |
| RHOBTB3    | 0.071728 |
| TJP3       | 0.071713 |
| PGAP2      | 0.071712 |
| RPS2P46    | 0.071708 |
| CAPN15     | 0.071695 |
| UQCRH      | 0.071686 |
| PACSIN2    | 0.071657 |
| CTNND1     | 0.071613 |
| HARS2      | 0.071562 |
| AL450326.1 | 0.071558 |
| OVGP1      | 0.07155  |
| FKBP7      | 0.07155  |
| QARS1      | 0.071543 |
| PMM1       | 0.071451 |
| TRMT61B    | 0.071439 |
| ARHGAP21   | 0.071423 |
| ALKBH5     | 0.071416 |
| ATF7       | 0.071406 |
| RBMS1      | 0.071403 |
| C11orf1    | 0.071394 |
| HNRNPCP2   | 0.071388 |
| FAM86DP    | 0.071374 |
| APEX2      | 0.07136  |
| HEXA       | 0.071359 |
| DEK        | 0.07132  |
| CCHCR1     | 0.071308 |
| KLHDC8B    | 0.071275 |
| NOC4L      | 0.071264 |
| ZNF593     | 0.071238 |
| UBQLN1     | 0.071216 |
| H2BC21     | 0.07118  |
| GLRX2      | 0.071179 |

|             |          |
|-------------|----------|
| ARHGAP1     | 0.071163 |
| ZNF205      | 0.071142 |
| DIABLO      | 0.071125 |
| PTPA        | 0.071106 |
| VEPH1       | 0.0711   |
| POLDIP2     | 0.07107  |
| HBP1        | 0.071034 |
| AL035458.1  | 0.070988 |
| RER1        | 0.070978 |
| SERTAD4-AS1 | 0.070946 |
| GEMIN5      | 0.070929 |
| MXI1        | 0.070914 |
| LAMTOR4     | 0.070892 |
| H3-3B       | 0.070812 |
| ASH2L       | 0.070746 |
| DST         | 0.070729 |
| SNU13       | 0.070718 |
| SNX7        | 0.070696 |
| HOXA5       | 0.070613 |
| PBXIP1      | 0.070574 |
| HIP1        | 0.070545 |
| ZMYM1       | 0.070479 |
| FAM110A     | 0.070478 |
| RFC4        | 0.070434 |
| SNF8        | 0.070425 |
| HSPA9       | 0.070324 |
| GRSF1       | 0.070302 |
| REXO4       | 0.070278 |
| NSUN5       | 0.070229 |
| PDIA3P1     | 0.070221 |
| TWF1        | 0.070127 |
| PRICKLE3    | 0.07009  |
| ESRRA       | 0.070043 |
| UBTD2       | 0.070014 |
| SLC44A1     | 0.069979 |
| FAM168B     | 0.069977 |
| WDR5        | 0.069976 |
| TMEM17      | 0.069973 |
| AHNAK       | 0.06995  |
| WDR70       | 0.069923 |
| BAD         | 0.069861 |
| CPT2        | 0.069857 |
| NAPRT       | 0.069751 |
| RUSC1       | 0.069746 |
| RIOK3       | 0.069679 |
| OCIAD1      | 0.069628 |
| NOP16       | 0.069613 |
| LRRC61      | 0.069581 |
| POU3F2      | 0.069541 |

|             |          |
|-------------|----------|
| PRAG1       | 0.069518 |
| RPL26       | 0.069445 |
| CARHSP1     | 0.069436 |
| ZNF329      | 0.069412 |
| OARD1       | 0.06941  |
| MAP2K3      | 0.069397 |
| TNIP1       | 0.069381 |
| TRIM6       | 0.06938  |
| C5orf51     | 0.069358 |
| MRC2        | 0.069355 |
| CPP         | 0.069348 |
| MYORG       | 0.069329 |
| AC009237.14 | 0.069327 |
| AFAP1L1     | 0.069309 |
| PTMAP5      | 0.069252 |
| TSPAN17     | 0.069206 |
| EIF3H       | 0.06919  |
| HEYL        | 0.069178 |
| ATP5PD      | 0.069153 |
| TTC27       | 0.069148 |
| ASCC1       | 0.069131 |
| FBH1P3      | 0.069104 |
| MYH14       | 0.069074 |
| RPP21       | 0.069069 |
| TPM1        | 0.069057 |
| FARSB       | 0.069056 |
| BHLHE40     | 0.06905  |
| KNOP1       | 0.069045 |
| SEC24C      | 0.069043 |
| RPUSD2      | 0.069005 |
| CHMP2B      | 0.068953 |
| TTC19       | 0.068947 |
| PRKAR2A     | 0.068929 |
| C3orf80     | 0.068905 |
| SLC25A5P5   | 0.068891 |
| AC015813.5  | 0.068879 |
| ZSWIM4      | 0.068802 |
| AASDHPPT    | 0.068799 |
| RRP1        | 0.068795 |
| EFNA1       | 0.068777 |
| FADS3       | 0.068775 |
| ZDHHC7      | 0.068749 |
| ZFR         | 0.068742 |
| RPS27P29    | 0.068734 |
| WDR1        | 0.068725 |
| APRT        | 0.068695 |
| AC005520.2  | 0.068637 |
| ZNF574      | 0.068587 |
| RACGAP1     | 0.068584 |

|            |          |
|------------|----------|
| RAI14      | 0.068565 |
| DNASE1L1   | 0.068538 |
| SEC11A     | 0.068449 |
| TXNDC12    | 0.068419 |
| MRPL51     | 0.068345 |
| ELP5       | 0.068275 |
| SKP1       | 0.06827  |
| LIPG       | 0.068269 |
| FAM53A     | 0.068261 |
| LINC01006  | 0.068239 |
| SPIN1      | 0.068226 |
| LRP11      | 0.068218 |
| SLBP       | 0.068211 |
| HYOU1      | 0.068204 |
| PCBP4      | 0.068069 |
| SYMPK      | 0.068061 |
| ZWILCH     | 0.068057 |
| SLC50A1    | 0.068054 |
| ATOH8      | 0.068052 |
| YME1L1     | 0.068043 |
| DPAGT1     | 0.068038 |
| HEXIM1     | 0.068037 |
| CDK16      | 0.068033 |
| TMEM184B   | 0.067985 |
| AL136116.3 | 0.067978 |
| FBL        | 0.067962 |
| DIAPH1     | 0.067955 |
| VAT1       | 0.067939 |
| ZDHHC12    | 0.067934 |
| TLE6       | 0.067902 |
| CYREN      | 0.067889 |
| USP40      | 0.067888 |
| SCARB1     | 0.067788 |
| ARPC3P3    | 0.067728 |
| SDHAF3     | 0.067698 |
| SLC26A6    | 0.067694 |
| SERTAD1    | 0.067677 |
| BCL6B      | 0.067675 |
| FBXO21     | 0.067658 |
| SLC38A2    | 0.067646 |
| S1PR3      | 0.067633 |
| FNDC3B     | 0.067567 |
| MYBL1      | 0.067523 |
| MAN1B1     | 0.067516 |
| SCAMP2     | 0.067478 |
| MANSC1     | 0.067466 |
| LHX6       | 0.067443 |
| UXS1       | 0.067413 |
| PARP4      | 0.067396 |

|            |          |
|------------|----------|
| SAMD1      | 0.067393 |
| SLC10A3    | 0.067375 |
| EIF1AXP1   | 0.067314 |
| GNB5       | 0.067286 |
| MARCHF6    | 0.067282 |
| SCN1B      | 0.067167 |
| ARF1       | 0.067128 |
| ATP1B1     | 0.067119 |
| SLC30A1    | 0.067111 |
| KRT16P2    | 0.067098 |
| CHMP1A     | 0.067076 |
| POGK       | 0.067038 |
| RNF144A    | 0.067033 |
| MAP1LC3C   | 0.067013 |
| MCAT       | 0.067011 |
| STAM       | 0.066942 |
| BRI3P1     | 0.066925 |
| TM9SF3     | 0.06691  |
| AC026271.1 | 0.066909 |
| SET        | 0.06689  |
| DNAJB12    | 0.066848 |
| TNFSF10    | 0.066838 |
| ABCC10     | 0.066815 |
| ATL2       | 0.0668   |
| JAG2       | 0.066725 |
| OGFOD1     | 0.066725 |
| CATSPER1   | 0.066618 |
| EML1       | 0.066542 |
| KLHL20     | 0.066482 |
| IGSF3      | 0.066438 |
| INPP5A     | 0.066415 |
| NFYC       | 0.066391 |
| AC009171.2 | 0.066378 |
| UBE3A      | 0.066299 |
| VKORC1     | 0.066292 |
| CCT7       | 0.066286 |
| CRLS1      | 0.066274 |
| CLN6       | 0.066237 |
| FTH1P16    | 0.066229 |
| MINPP1     | 0.066207 |
| GBA        | 0.066195 |
| SPAG7      | 0.065991 |
| RPL37A     | 0.065954 |
| NINJ1      | 0.065938 |
| MPHOSPH10  | 0.065921 |
| AL358075.2 | 0.065914 |
| C1DP1      | 0.065911 |
| IFNLR1     | 0.065875 |
| TJAP1      | 0.06587  |

|            |          |
|------------|----------|
| RAB5B      | 0.065807 |
| BTBD7      | 0.065737 |
| MRS2       | 0.065647 |
| RFC5       | 0.065626 |
| ACAT2      | 0.065612 |
| RPL32P27   | 0.065591 |
| SSR3       | 0.065496 |
| CMTM4      | 0.065495 |
| PSMD9      | 0.065443 |
| CD320      | 0.065428 |
| GAA        | 0.065404 |
| YEATS2     | 0.065371 |
| MUC13      | 0.065358 |
| HDHD3      | 0.065322 |
| NOP14      | 0.065317 |
| KPNA4      | 0.065314 |
| TRAPPC1    | 0.065296 |
| OCLN       | 0.065258 |
| DEAF1      | 0.065231 |
| NRARP      | 0.06522  |
| CSDE1      | 0.065187 |
| SIN3A      | 0.065179 |
| TYRP1      | 0.065151 |
| PRSS8      | 0.065148 |
| RPUSD3     | 0.065134 |
| MYO5C      | 0.065129 |
| BDH1       | 0.06509  |
| MYO19      | 0.065002 |
| POLR1A     | 0.064997 |
| RIC8A      | 0.064984 |
| MAGEF1     | 0.064949 |
| RNF40      | 0.064856 |
| METTL2A    | 0.064768 |
| PRDM16     | 0.064744 |
| SMIM19     | 0.06473  |
| CTNNBIP1   | 0.064718 |
| AL139156.2 | 0.064714 |
| FRMD8      | 0.064672 |
| NPTXR      | 0.06467  |
| MT-TL1     | 0.06461  |
| PP7080     | 0.064606 |
| FOXP4-AS1  | 0.064598 |
| LEO1       | 0.064553 |
| SCAP       | 0.064553 |
| TOMM70     | 0.064538 |
| AC115522.1 | 0.064522 |
| CEP85      | 0.064518 |
| RPL35A     | 0.064445 |
| KCNE3      | 0.064414 |

|            |          |
|------------|----------|
| DNMT3A     | 0.064378 |
| NKIRAS1    | 0.064369 |
| RNF214     | 0.064323 |
| GALNS      | 0.064314 |
| MAGI1      | 0.064299 |
| MAD2L1     | 0.064278 |
| SCFD2      | 0.064262 |
| GNA11      | 0.064256 |
| CHD4       | 0.064242 |
| SF3A1      | 0.064225 |
| EGLN1      | 0.064211 |
| PLEKHG2    | 0.06419  |
| SCYL1      | 0.064178 |
| PRKAB2     | 0.064165 |
| GRWD1      | 0.064001 |
| NR2F1-AS1  | 0.063983 |
| LSM12P1    | 0.063839 |
| AL139100.1 | 0.063838 |
| H3C10      | 0.063807 |
| HDAC2      | 0.063806 |
| SPON1      | 0.063791 |
| HEBP2      | 0.063757 |
| RTN4       | 0.063731 |
| AL021392.1 | 0.063721 |
| PHB2       | 0.063714 |
| DIP2B      | 0.063711 |
| NAA15      | 0.063664 |
| CDK5R1     | 0.06366  |
| SHCBP1     | 0.063645 |
| BTD        | 0.063633 |
| LEPROT     | 0.063621 |
| TOMM20     | 0.063619 |
| MTPN       | 0.063606 |
| CENPV      | 0.063606 |
| SCMH1      | 0.063605 |
| SFXN3      | 0.063521 |
| KIFC3      | 0.063492 |
| CCT8       | 0.063373 |
| CASK       | 0.063361 |
| ZMAT2      | 0.063354 |
| VPS11      | 0.063341 |
| PDIA3      | 0.063314 |
| ITFG1      | 0.063308 |
| GNB1       | 0.063285 |
| SLC35F6    | 0.063255 |
| HIF1A      | 0.063232 |
| PPP1R26    | 0.06321  |
| LIN9       | 0.063197 |
| AL390198.1 | 0.063189 |

|           |          |
|-----------|----------|
| ACTB      | 0.063172 |
| INPPL1    | 0.063155 |
| HMGN1     | 0.063139 |
| YWHAZP4   | 0.063095 |
| LCLAT1    | 0.063094 |
| CRYZL2P   | 0.063084 |
| MAP7D3    | 0.063076 |
| ELAC2     | 0.063072 |
| ANKS1A    | 0.063022 |
| LIAS      | 0.063003 |
| BCKDHA    | 0.062892 |
| NRDC      | 0.062889 |
| FTLP3     | 0.06288  |
| ZKSCAN7   | 0.062862 |
| JMJD6     | 0.062849 |
| TMEM160   | 0.062798 |
| YTHDF2    | 0.062787 |
| DCTD      | 0.062728 |
| LRRC47    | 0.062727 |
| CAB39     | 0.062712 |
| SMIM14    | 0.062708 |
| SLC52A2   | 0.062702 |
| ROBO2     | 0.062681 |
| NIPSNAP2  | 0.062672 |
| LRPAP1    | 0.062657 |
| CCM2L     | 0.062632 |
| PPP3R1    | 0.062621 |
| CENPI     | 0.062556 |
| TOMM40    | 0.062497 |
| PTP4A2    | 0.062469 |
| TBC1D16   | 0.062431 |
| MUL1      | 0.062426 |
| LINC02321 | 0.062423 |
| TRAPPC4   | 0.062414 |
| RUSC2     | 0.062405 |
| C22orf46  | 0.062389 |
| MRPS11    | 0.062316 |
| CDCA7     | 0.062293 |
| NOP2      | 0.062287 |
| FBXL15    | 0.06228  |
| MARK2     | 0.062248 |
| DPM2      | 0.062226 |
| UBA52P8   | 0.062212 |
| KLF3      | 0.062202 |
| ATAT1     | 0.062201 |
| FAM86HP   | 0.062165 |
| TMEM39B   | 0.06214  |
| SAP130    | 0.062139 |
| STOX2     | 0.062055 |



|            |          |
|------------|----------|
| MPST       | 0.062052 |
| NUDT1      | 0.062025 |
| ACP6       | 0.061999 |
| RPL24      | 0.061944 |
| RPL32P18   | 0.061883 |
| TOR1AIP2   | 0.061854 |
| SLAIN2     | 0.061768 |
| MPP3       | 0.06175  |
| MOV10      | 0.061748 |
| SBDSP1     | 0.061704 |
| NT5C       | 0.061699 |
| SMIM15     | 0.061677 |
| AC007182.2 | 0.061635 |
| C1orf116   | 0.061622 |
| AC018868.1 | 0.061609 |
| COG6       | 0.061608 |
| SMC4       | 0.061574 |
| AC084117.1 | 0.061566 |
| MYOZ1      | 0.061551 |
| UBE2Q1     | 0.061463 |
| INPP5F     | 0.061418 |
| ZNF391     | 0.061347 |
| LOXL1      | 0.061321 |
| BUB1       | 0.061321 |
| RNF216     | 0.061307 |
| POM121C    | 0.061267 |
| TFAM       | 0.061206 |
| LMAN2L     | 0.0612   |
| PUS3       | 0.061158 |
| LYSMD1     | 0.061141 |
| RCOR1      | 0.061097 |
| BCAS2      | 0.061037 |
| HSF1       | 0.060997 |
| GYS1       | 0.060944 |
| RANGAP1    | 0.060909 |
| PTMAP9     | 0.060885 |
| FAHD2B     | 0.060867 |
| OPA3       | 0.060858 |
| AC046143.1 | 0.060851 |
| NECAB3     | 0.060839 |
| BMS1       | 0.060827 |
| PPFIA1     | 0.060774 |
| POLR2B     | 0.060727 |
| CPLANE2    | 0.060725 |
| ACTR1A     | 0.060672 |
| TM9SF4     | 0.060665 |
| TAGLN2     | 0.060665 |
| DIP2C      | 0.060664 |
| NOSTRIN    | 0.060663 |

|            |          |
|------------|----------|
| CAMLG      | 0.060622 |
| AL604028.1 | 0.060559 |
| CELSR2     | 0.060549 |
| CEP131     | 0.060517 |
| KDM1B      | 0.060501 |
| CTSD       | 0.060494 |
| TWSG1      | 0.060473 |
| GARS1      | 0.060461 |
| HMG2P15    | 0.060433 |
| TBC1D13    | 0.060429 |
| SNRPEP11   | 0.060424 |
| AC022211.2 | 0.060423 |
| COA4       | 0.060399 |
| PCDHGB7    | 0.060348 |
| GTPBP2     | 0.060337 |
| AC005229.3 | 0.0603   |
| SYNDIG1    | 0.060292 |
| SCP2       | 0.060279 |
| COIL       | 0.060268 |
| STAMBP     | 0.060264 |
| LARP1      | 0.060225 |
| MORN4      | 0.060224 |
| GNL2       | 0.060171 |
| HEBP1      | 0.060145 |
| AC090589.1 | 0.060126 |
| SEC61A1    | 0.060117 |
| SEC16A     | 0.06008  |
| ZNF850     | 0.060071 |
| MFGE8      | 0.060053 |
| RPS20      | 0.060044 |
| PEX11G     | 0.059987 |
| ATP6V0C    | 0.059909 |
| EMC7       | 0.059884 |
| FOX2-AS1   | 0.059858 |
| RPL38      | 0.059848 |
| FANCI      | 0.059841 |
| AL031985.3 | 0.059825 |
| PIGZ       | 0.059816 |
| SPART      | 0.059808 |
| PRRC1      | 0.059793 |
| CAP1       | 0.059786 |
| RABGEF1    | 0.059753 |
| HNRNPA1    | 0.059739 |
| PIK3C2B    | 0.059583 |
| WDR24      | 0.059582 |
| ERBB3      | 0.059531 |
| PBX2       | 0.059518 |
| NUS1P1     | 0.059451 |
| YIPF1      | 0.05944  |

|            |          |
|------------|----------|
| SULT2B1    | 0.059439 |
| TMEM53     | 0.059409 |
| CIZ1       | 0.059396 |
| ZFAND6     | 0.059386 |
| PLK4       | 0.059378 |
| HMGN1P38   | 0.059319 |
| ZNF212     | 0.059309 |
| C1orf43    | 0.059295 |
| ATG101     | 0.059261 |
| KCNS3      | 0.059201 |
| ITSN1      | 0.059191 |
| FEN1       | 0.059147 |
| GFPT1      | 0.059097 |
| NIFK       | 0.059095 |
| SLC41A3    | 0.059063 |
| SUV39H1    | 0.05903  |
| TAPT1-AS1  | 0.059019 |
| TMX2       | 0.058979 |
| NCAPH      | 0.058973 |
| EIF2B2     | 0.058973 |
| LLGL2      | 0.05892  |
| SEMA6B     | 0.058915 |
| ZDHHC18    | 0.058906 |
| TMEM115    | 0.058891 |
| TPRA1      | 0.058865 |
| KLHL12     | 0.058861 |
| CCDC102A   | 0.058832 |
| PLPPR2     | 0.058791 |
| SKI        | 0.058749 |
| SUGT1      | 0.058696 |
| AC022007.1 | 0.058694 |
| PUM1       | 0.058692 |
| TGOLN2     | 0.058663 |
| PSMD5      | 0.0586   |
| ELF3       | 0.058595 |
| MAP2K4     | 0.05858  |
| ATP6AP1L   | 0.058548 |
| FRMD5      | 0.058486 |
| ZIK1       | 0.058482 |
| EIF1AD     | 0.05847  |
| NOD1       | 0.058462 |
| NDUFA12    | 0.058441 |
| CYB5R2     | 0.058434 |
| PNPLA4     | 0.058426 |
| SHROOM2    | 0.058403 |
| MSH6       | 0.058372 |
| ATG10      | 0.05836  |
| RPL41P5    | 0.058323 |
| ITGBL1     | 0.05832  |

|            |          |
|------------|----------|
| AL121820.2 | 0.058243 |
| UBE2I      | 0.058241 |
| SASS6      | 0.058224 |
| GHITM      | 0.058215 |
| RNF168     | 0.058189 |
| SLC35A1    | 0.058178 |
| AC106795.1 | 0.05816  |
| YWHAQ      | 0.058156 |
| AASDH      | 0.058075 |
| GOLM2      | 0.058071 |
| ANKH       | 0.057941 |
| SUFU       | 0.057916 |
| DDX23      | 0.057909 |
| TMEM81     | 0.057906 |
| IPO8       | 0.057859 |
| DM1-AS     | 0.057852 |
| RREB1      | 0.05784  |
| TRIAP1     | 0.057813 |
| PCLAF      | 0.05776  |
| PDZD4      | 0.057751 |
| FAM8A1     | 0.057746 |
| SNORD36C   | 0.05772  |
| VPS25      | 0.057674 |
| TOE1       | 0.057673 |
| AC099560.2 | 0.057667 |
| DYNC1I2    | 0.057658 |
| PPP1R16A   | 0.057657 |
| DUT        | 0.057643 |
| PLPP2      | 0.05763  |
| SURF4      | 0.057596 |
| CRACD      | 0.057573 |
| MAST4      | 0.057553 |
| SUMO2      | 0.057526 |
| E2F6       | 0.057486 |
| GHDC       | 0.057475 |
| CDC27      | 0.05745  |
| AAGAB      | 0.057407 |
| AC243919.1 | 0.057389 |
| PTRHD1     | 0.057389 |
| GNL3       | 0.057379 |
| NOMO1      | 0.05737  |
| PLAG1      | 0.057363 |
| KDELRL1    | 0.057333 |
| EIF4EBP3   | 0.057323 |
| WWTR1      | 0.057285 |
| PPP4R1     | 0.057274 |
| AURKB      | 0.057265 |
| PGRMC2     | 0.057256 |
| RAD18      | 0.057204 |

|            |          |
|------------|----------|
| CENPK      | 0.057158 |
| ETFA       | 0.057148 |
| KIF1B      | 0.057144 |
| MED15      | 0.057135 |
| LMBR1      | 0.057115 |
| IPO7       | 0.057093 |
| SPRYD3     | 0.057027 |
| TRIM24     | 0.057011 |
| HROB       | 0.056994 |
| PFKFB4     | 0.056985 |
| CTH        | 0.056977 |
| PEX19      | 0.05696  |
| CD1A       | 0.056953 |
| SMIM10     | 0.056888 |
| ARNT       | 0.056874 |
| THAP7      | 0.056859 |
| CASTOR3    | 0.056842 |
| RPA3       | 0.0568   |
| RASSF8-AS1 | 0.056733 |
| INPP5K     | 0.056722 |
| FP565260.1 | 0.056642 |
| NMT1       | 0.056628 |
| TGFBR1     | 0.056607 |
| MT1DP      | 0.056599 |
| SERTAD2    | 0.056595 |
| RNF7       | 0.056592 |
| PHLDB1     | 0.056588 |
| DNAJC21    | 0.056462 |
| TMEM184C   | 0.056453 |
| PPP2R2A    | 0.056442 |
| AJM1       | 0.056425 |
| UBFD1      | 0.056413 |
| GMEB2      | 0.0564   |
| SINHCAF    | 0.056392 |
| CNTN3      | 0.056295 |
| SENP1      | 0.056223 |
| BTRC       | 0.056174 |
| WBP1L      | 0.056173 |
| TMEM25     | 0.056169 |
| NSFL1C     | 0.056143 |
| SLC4A2     | 0.056118 |
| METAP1     | 0.056094 |
| SUCLG2     | 0.056071 |
| POLM       | 0.056071 |
| UQCRQ      | 0.056069 |
| SEM1       | 0.056027 |
| GUK1       | 0.056002 |
| SPATA20    | 0.055987 |
| INSYN2A    | 0.055979 |

|            |          |
|------------|----------|
| TMEM44-AS1 | 0.055969 |
| PFAS       | 0.055968 |
| TBCC       | 0.055955 |
| BCOR       | 0.055954 |
| SLC38A10   | 0.055938 |
| BRIP1      | 0.055924 |
| HAT1       | 0.055876 |
| AL591846.1 | 0.055871 |
| RTN2       | 0.055844 |
| IARS2      | 0.055833 |
| CRIP1      | 0.055801 |
| TSG101     | 0.055766 |
| VDR        | 0.055727 |
| RAB1A      | 0.055722 |
| MRPL47     | 0.055721 |
| WARS2      | 0.055708 |
| SZRD1      | 0.055691 |
| UGT1A6     | 0.055667 |
| EEF1A1P4   | 0.055625 |
| ECHS1      | 0.055605 |
| LIG3       | 0.055596 |
| PFDN1      | 0.055575 |
| ATL3       | 0.055573 |
| MYO5B      | 0.055477 |
| MEST       | 0.05543  |
| KLHL23     | 0.055396 |
| CDC42BPA   | 0.055349 |
| RPL23AP42  | 0.055306 |
| ANP32B     | 0.05528  |
| TLNRD1     | 0.055274 |
| HMGCR      | 0.055189 |
| CCDC127    | 0.055168 |
| AIDA       | 0.055143 |
| STYXL1     | 0.055143 |
| LRRC57     | 0.055134 |
| RWDD2B     | 0.055122 |
| CTDSP1     | 0.055075 |
| NSA2       | 0.055067 |
| NQO2       | 0.055029 |
| PYROXD1    | 0.055023 |
| ZMIZ2      | 0.055002 |
| WBP2       | 0.054996 |
| ANO8       | 0.054972 |
| COQ3       | 0.054959 |
| FAM20B     | 0.054941 |
| UBE2D3P1   | 0.054897 |
| CCNDBP1    | 0.054895 |
| PGRMC1     | 0.054857 |
| HMGB1P10   | 0.054856 |

|            |          |
|------------|----------|
| TCAF1      | 0.05484  |
| PLEKHG3    | 0.054717 |
| SEPTIN2    | 0.054715 |
| SCD        | 0.054693 |
| MORC2      | 0.054654 |
| NCK2       | 0.054642 |
| SMIM10L2B  | 0.054635 |
| MRPS9      | 0.054634 |
| MRPS21     | 0.054613 |
| ZNF408     | 0.054596 |
| CDK5       | 0.054592 |
| NELFB      | 0.054589 |
| TNNC2      | 0.054589 |
| FUT4       | 0.054587 |
| RPL23AP7   | 0.05455  |
| ZNF184     | 0.054494 |
| MYO1B      | 0.054494 |
| GPBP1L1    | 0.054384 |
| C6orf136   | 0.05434  |
| MED11      | 0.05431  |
| AL035661.1 | 0.054295 |
| SCO1       | 0.054292 |
| PCCB       | 0.054228 |
| KHSRP      | 0.054204 |
| HK2-DT     | 0.05418  |
| GLIS3      | 0.054175 |
| CTDNEP1    | 0.054149 |
| SOX18      | 0.054147 |
| THOC7      | 0.054141 |
| PHF13      | 0.054133 |
| MKNK2      | 0.05413  |
| AQR        | 0.054129 |
| SLC20A2    | 0.05409  |
| GOLGA7     | 0.054087 |
| TRUB1      | 0.054081 |
| PPP2R5A    | 0.054067 |
| ASB6       | 0.054066 |
| DNAJB6     | 0.054058 |
| NMRAL1     | 0.054037 |
| UBE2V2     | 0.053992 |
| AP003068.2 | 0.053922 |
| RAB11B-AS1 | 0.053921 |
| ST13       | 0.053906 |
| SRM        | 0.053875 |
| ENSA       | 0.053842 |
| TRDMT1     | 0.05381  |
| C19orf48   | 0.053796 |
| CEBPB      | 0.053754 |
| FN3KRP     | 0.053746 |

|            |          |
|------------|----------|
| FOXD3-AS1  | 0.053708 |
| CHMP2A     | 0.053692 |
| AL365436.1 | 0.053687 |
| CIB1       | 0.053673 |
| DNAJC5     | 0.053664 |
| NFS1       | 0.053658 |
| TRMT10A    | 0.053632 |
| PLD6       | 0.053615 |
| B3GNT8     | 0.053607 |
| UBL3       | 0.053536 |
| URM1       | 0.053488 |
| HEG1       | 0.053432 |
| DDIAS      | 0.053413 |
| ZMYND19    | 0.053399 |
| MAP3K21    | 0.053362 |
| ANKRD24    | 0.053361 |
| TAF15      | 0.053356 |
| STK40      | 0.053347 |
| MPP5       | 0.05334  |
| ABITRAM    | 0.053325 |
| NDUFB10    | 0.053295 |
| CETN3      | 0.053254 |
| NUP62CL    | 0.053242 |
| MRPL43     | 0.053224 |
| MRPL11     | 0.053205 |
| URB1       | 0.053197 |
| PCBP2      | 0.053195 |
| KLHL35     | 0.053173 |
| ZNF219     | 0.053139 |
| GLG1       | 0.053073 |
| INTS3      | 0.05305  |
| POM121     | 0.053038 |
| ZSCAN9     | 0.053025 |
| PPP2CA     | 0.053013 |
| ATP2A2     | 0.053002 |
| RPL41      | 0.053    |
| RBM47      | 0.052988 |
| RETREG2    | 0.052952 |
| CTSA       | 0.052946 |
| SLC16A9    | 0.052911 |
| RAB35      | 0.052906 |
| TSPAN10    | 0.052895 |
| AL713899.1 | 0.05289  |
| PAM        | 0.052811 |
| CENPF      | 0.052807 |
| GLB1L2     | 0.052752 |
| IGFBP5     | 0.05274  |
| ADAMTS14   | 0.052719 |
| CDC42EP4   | 0.052692 |



|            |          |
|------------|----------|
| MEX3B      | 0.052668 |
| STOML1     | 0.052641 |
| WWC3       | 0.052613 |
| ZNF768     | 0.052601 |
| CAP1P1     | 0.052575 |
| ATP5MC1    | 0.052554 |
| BACH1      | 0.052534 |
| SMURF2     | 0.05252  |
| ELOVL2     | 0.052496 |
| AGPS       | 0.052415 |
| CRB3       | 0.0524   |
| IQCE       | 0.052368 |
| PDCD6IP    | 0.052367 |
| AC024941.2 | 0.052339 |
| AC016355.1 | 0.052335 |
| MED18      | 0.052327 |
| AC079145.1 | 0.052277 |
| AP001469.3 | 0.052249 |
| VPS45      | 0.052247 |
| AC009686.2 | 0.052236 |
| U47924.3   | 0.052206 |
| GTF2E1     | 0.052202 |
| ZNF213     | 0.052173 |
| RPS7P11    | 0.052166 |
| SULF2      | 0.052161 |
| GPD1L      | 0.052161 |
| CD2AP      | 0.052135 |
| C18orf54   | 0.052134 |
| CANX       | 0.052044 |
| TSTD1      | 0.052043 |
| PYM1       | 0.052026 |
| LINC02861  | 0.051959 |
| PLA2G4E    | 0.051886 |
| SF3B2      | 0.051866 |
| SRP14      | 0.051857 |
| FLJ20021   | 0.05184  |
| SRPRA      | 0.051819 |
| ABHD11     | 0.05179  |
| CRTAP      | 0.051784 |
| FNBP1L     | 0.051774 |
| UROS       | 0.051759 |
| SLC30A9    | 0.051741 |
| PIIB       | 0.051711 |
| HMGCL      | 0.051696 |
| TRIM59     | 0.05168  |
| DNAJC9     | 0.051656 |
| ITGB6      | 0.051634 |
| PCDH18     | 0.051627 |
| TBCCD1     | 0.051613 |

|           |          |
|-----------|----------|
| IWS1      | 0.05161  |
| STRN4     | 0.05161  |
| TFAP4     | 0.0516   |
| CTU1      | 0.051571 |
| NAA50     | 0.051559 |
| SLC37A1   | 0.051555 |
| OAZ2      | 0.051496 |
| TMTC3     | 0.051475 |
| NR4A2     | 0.051472 |
| RFK       | 0.05147  |
| OCRL      | 0.051451 |
| KCTD20    | 0.051439 |
| ATPAF1    | 0.051419 |
| GFM1      | 0.051371 |
| POP5      | 0.051368 |
| SEC22A    | 0.051339 |
| FPGS      | 0.051311 |
| HAUS2     | 0.051291 |
| METTL5    | 0.051252 |
| AJUBA     | 0.05125  |
| TRAIP     | 0.051237 |
| CCM2      | 0.051219 |
| SLC37A4   | 0.05121  |
| POLB      | 0.051177 |
| FKBP1A    | 0.051167 |
| ALCAM     | 0.051131 |
| FAF1      | 0.051108 |
| RPL23     | 0.051009 |
| HELZ2     | 0.051008 |
| UBE2J2    | 0.050984 |
| ERMP1     | 0.050935 |
| ATG12     | 0.050911 |
| POLR1B    | 0.050911 |
| SLC41A1   | 0.050851 |
| FOXJ2     | 0.050821 |
| PSMB7     | 0.050793 |
| TP53      | 0.050785 |
| TMPRSS4   | 0.050753 |
| ZBTB7A    | 0.050724 |
| SMG7      | 0.050712 |
| PSMC3IP   | 0.050708 |
| FAM89B    | 0.050672 |
| CUEDC1    | 0.050671 |
| CENPS     | 0.050658 |
| MYZAP     | 0.050639 |
| MRPS15    | 0.050625 |
| SEPTIN5   | 0.05062  |
| PRR34-AS1 | 0.050604 |
| RYK       | 0.050555 |

|           |          |
|-----------|----------|
| MLX       | 0.050534 |
| NCDN      | 0.050533 |
| TCF19     | 0.050523 |
| SLC38A9   | 0.050514 |
| ITPRIP    | 0.050505 |
| EZR       | 0.050485 |
| C7orf26   | 0.05042  |
| ZHX3      | 0.050414 |
| RRNAD1    | 0.050387 |
| DECR2     | 0.050377 |
| C9orf40   | 0.050371 |
| ARSK      | 0.050338 |
| SPSB1     | 0.050296 |
| SDSL      | 0.050175 |
| TPRN      | 0.050154 |
| SNRPD3    | 0.05013  |
| BLOC1S5   | 0.050085 |
| LRRN4CL   | 0.050074 |
| MRPS22    | 0.050047 |
| GET4      | 0.050037 |
| UBE3B     | 0.050035 |
| RPS28P7   | 0.050004 |
| DENND10   | 0.049984 |
| RAD54L    | 0.049976 |
| ATP11A    | 0.049966 |
| TRIP4     | 0.049963 |
| BOD1      | 0.049944 |
| ZNF22-AS1 | 0.04994  |
| RPL23AP82 | 0.04993  |
| EXOC4     | 0.049912 |
| PAQR6     | 0.049901 |
| FAM98B    | 0.049885 |
| ZNF319    | 0.049884 |
| INKA2     | 0.049878 |
| DKC1      | 0.049839 |
| EPOP      | 0.049834 |
| CX3CR1    | 0.049826 |
| SART1     | 0.049741 |
| SVBP      | 0.0497   |
| KIAA0100  | 0.049691 |
| ZSCAN21   | 0.049689 |
| ZNF526    | 0.049653 |
| DCUN1D4   | 0.04965  |
| APP       | 0.04964  |
| RPS18P9   | 0.049581 |
| CENPE     | 0.049563 |
| NME1      | 0.049547 |
| DLAT      | 0.049537 |
| USP14     | 0.049503 |

|            |          |
|------------|----------|
| YWHAZ      | 0.049485 |
| ERCC1      | 0.049464 |
| GRHL2      | 0.049455 |
| RASAL2     | 0.049411 |
| RPL11      | 0.049402 |
| MT1F       | 0.049401 |
| EMC3       | 0.0494   |
| NGFR       | 0.049386 |
| BACE1-AS   | 0.049335 |
| DNAJA3     | 0.049328 |
| PITPNA     | 0.049307 |
| SUPV3L1    | 0.049279 |
| EFTUD2     | 0.049242 |
| RNF152     | 0.049238 |
| CACUL1     | 0.049228 |
| C3         | 0.049123 |
| RPF1       | 0.0491   |
| ZKSCAN1    | 0.049073 |
| IP6K1      | 0.049034 |
| SIVA1      | 0.049033 |
| C12orf57   | 0.049023 |
| MTRR       | 0.048994 |
| PDF        | 0.048951 |
| SLK        | 0.048929 |
| AC072052.1 | 0.048921 |
| DYNC2I2    | 0.0489   |
| SNHG16     | 0.048861 |
| RAB40B     | 0.048855 |
| NUDT17     | 0.048832 |
| ATP6V1FNB  | 0.048831 |
| CNPY2      | 0.048829 |
| ACER2      | 0.04881  |
| C1orf35    | 0.048807 |
| AC036214.2 | 0.048795 |
| MEF2D      | 0.048776 |
| BUD23      | 0.048766 |
| PCDHB5     | 0.048759 |
| GNPDA2     | 0.048749 |
| UTP4       | 0.048744 |
| NOP10      | 0.048738 |
| NACC2      | 0.048735 |
| TMEM87B    | 0.048715 |
| POLE3      | 0.048698 |
| ERP29      | 0.048696 |
| CCDC24     | 0.048692 |
| NUCKS1     | 0.048687 |
| ESR1       | 0.048674 |
| COX19      | 0.048612 |
| PFKFB3     | 0.048586 |

|            |          |
|------------|----------|
| FLYWCH2    | 0.048582 |
| GALNT5     | 0.048547 |
| TTC3P1     | 0.048506 |
| SSC5D      | 0.048506 |
| ZFAND2A-DT | 0.048492 |
| NCBP2AS2   | 0.048474 |
| LINC00638  | 0.048473 |
| SLC35D2    | 0.048408 |
| ZMYM4      | 0.048397 |
| CTBP1      | 0.048384 |
| RPL35P5    | 0.048383 |
| ARPIN      | 0.04836  |
| DESI2      | 0.048349 |
| THOC5      | 0.048349 |
| YBEY       | 0.048267 |
| TMCO4      | 0.048259 |
| AC092368.3 | 0.048251 |
| COX7C      | 0.048249 |
| NIT1       | 0.048246 |
| GATAD2B    | 0.048242 |
| LZTS1      | 0.048202 |
| TIGD6      | 0.048191 |
| KLF10      | 0.048175 |
| SMARCC2    | 0.048173 |
| MMP24OS    | 0.048123 |
| MRPL4      | 0.048079 |
| AHCYL1     | 0.048043 |
| RNF4       | 0.048023 |
| LPCAT1     | 0.047991 |
| RAB11FIP1  | 0.047961 |
| LDHAP7     | 0.047921 |
| PEF1       | 0.047889 |
| AL157838.1 | 0.047871 |
| HID1       | 0.047862 |
| SHARPIN    | 0.047821 |
| DCUN1D5    | 0.047817 |
| BCL2L1     | 0.047814 |
| SEPTIN8    | 0.047796 |
| COPZ2      | 0.047769 |
| AL158801.4 | 0.047737 |
| MEN1       | 0.047725 |
| NUDC       | 0.047682 |
| DUSP8      | 0.047655 |
| ERMAP      | 0.047646 |
| AC087741.3 | 0.047602 |
| KBTBD11    | 0.047556 |
| TBC1D10B   | 0.047556 |
| WASH3P     | 0.047548 |
| RHBDD2     | 0.047536 |

|            |          |
|------------|----------|
| PNO1       | 0.047527 |
| TIPARP-AS1 | 0.047519 |
| BANF1      | 0.047508 |
| STT3B      | 0.0475   |
| LSM12      | 0.047487 |
| TMUB1      | 0.047462 |
| TYW1B      | 0.047448 |
| CTTNBP2NL  | 0.047435 |
| CCDC8      | 0.047424 |
| AC011294.1 | 0.047418 |
| NBR1       | 0.047408 |
| GSK3A      | 0.047404 |
| NT5C3B     | 0.047395 |
| SH3RF1     | 0.047373 |
| WIPF2      | 0.047345 |
| AP002761.1 | 0.047342 |
| ACTRT3     | 0.0473   |
| EXOSC10    | 0.047299 |
| RTCA       | 0.047284 |
| PCBP1      | 0.047217 |
| PIM3       | 0.047205 |
| SEC23IP    | 0.047195 |
| AP2S1      | 0.047185 |
| METTL16    | 0.047132 |
| SIPA1L1    | 0.047128 |
| GPRASP2    | 0.047116 |
| STK19      | 0.047109 |
| RPL26L1    | 0.047099 |
| SLC12A9    | 0.047095 |
| GNAI3      | 0.04708  |
| HOPX       | 0.047043 |
| RPS6KA2    | 0.04703  |
| PTBP1      | 0.046964 |
| RAPGEFL1   | 0.046923 |
| LDLRAP1    | 0.046918 |
| ACVR2B     | 0.046916 |
| CWC22      | 0.046898 |
| HHIP-AS1   | 0.046895 |
| GPN3       | 0.046887 |
| DAXX       | 0.04688  |
| H2AZ2      | 0.046873 |
| RPL41P1    | 0.04687  |
| SNX8       | 0.046867 |
| NDST1      | 0.046812 |
| NPRL3      | 0.04677  |
| ADCY6      | 0.046714 |
| DNAJC17    | 0.046689 |
| SRPK3      | 0.046673 |
| TBC1D8B    | 0.046656 |

|            |          |
|------------|----------|
| ACLY       | 0.046625 |
| ANKRD52    | 0.046562 |
| AQP9       | 0.046532 |
| SIRT5      | 0.046487 |
| C19orf71   | 0.046475 |
| NDUFS4     | 0.046415 |
| MTCO2P2    | 0.046401 |
| GCHFR      | 0.046342 |
| ASPM       | 0.046313 |
| MAP3K11    | 0.046311 |
| MOCOS      | 0.0463   |
| LRFN3      | 0.04628  |
| FAM174C    | 0.046277 |
| BEND3      | 0.046253 |
| TMEM161A   | 0.04623  |
| MSH3       | 0.046225 |
| ARHGDIA    | 0.046199 |
| EGLN3      | 0.046192 |
| KDR        | 0.046154 |
| FDXACB1    | 0.04612  |
| SPDYE12P   | 0.046044 |
| SLC20A1    | 0.046026 |
| AC098487.1 | 0.046023 |
| HCG15      | 0.04602  |
| AC012306.2 | 0.045966 |
| B4GAT1     | 0.045929 |
| FAAP100    | 0.045912 |
| RAB3GAP1   | 0.045887 |
| ANKIB1     | 0.045885 |
| GINM1      | 0.045851 |
| TNFRSF10B  | 0.045808 |
| ICA1       | 0.045786 |
| TLN2       | 0.045766 |
| ICAM1      | 0.045759 |
| POC1A      | 0.045759 |
| MPLKIP     | 0.045757 |
| AC024896.1 | 0.045726 |
| HNRNPA3P6  | 0.045723 |
| GNG5       | 0.045631 |
| ATXN10     | 0.04561  |
| CDKN2AIPNL | 0.045606 |
| EIF3D      | 0.045603 |
| B4GALT3    | 0.045589 |
| KTI12      | 0.045572 |
| VWA1       | 0.045552 |
| AL162511.1 | 0.045548 |
| ZDHHC8     | 0.045543 |
| NBAS       | 0.045539 |
| MYOM1      | 0.045469 |

|            |          |
|------------|----------|
| GJB6       | 0.045464 |
| AL354836.1 | 0.045387 |
| CEBPZOS    | 0.045331 |
| CAND2      | 0.045316 |
| PGM3       | 0.045274 |
| SMC2       | 0.045273 |
| TMEM201    | 0.045131 |
| GLUD1      | 0.045119 |
| ETS2       | 0.045116 |
| MAP3K7CL   | 0.045114 |
| GIN53      | 0.045088 |
| GTF2H3     | 0.045083 |
| PPT1       | 0.044983 |
| KCTD10     | 0.044903 |
| KANK2      | 0.044901 |
| SLC35B4    | 0.044846 |
| UBAC2      | 0.044842 |
| EIF2B4     | 0.044829 |
| RAB7A      | 0.044829 |
| RINT1      | 0.04482  |
| AC090114.1 | 0.044768 |
| ACTG1P20   | 0.044764 |
| SLC25A24   | 0.04474  |
| ZNHIT2     | 0.044691 |
| CASP2      | 0.04466  |
| NSD2       | 0.044625 |
| MEIS2      | 0.04462  |
| PGAM5      | 0.044585 |
| GOLT1A     | 0.044583 |
| TTI1       | 0.044563 |
| ENO3       | 0.044541 |
| N4BP1      | 0.044538 |
| ECPAS      | 0.0445   |
| EFHD2      | 0.044499 |
| VPS33A     | 0.044492 |
| TFIP11     | 0.044466 |
| DHX29      | 0.044458 |
| MST1       | 0.044453 |
| DUSP12     | 0.044447 |
| FEZF1-AS1  | 0.044416 |
| ASB7       | 0.044392 |
| PRDM4      | 0.044368 |
| RPS24      | 0.044368 |
| TSPAN14    | 0.044345 |
| PAFAH1B1   | 0.044292 |
| RFC1       | 0.044279 |
| RXRB       | 0.044245 |
| BSDC1      | 0.044232 |
| NUAK1      | 0.044221 |



|            |          |
|------------|----------|
| IKBK       | 0.044162 |
| MICB       | 0.044142 |
| U47924.2   | 0.044136 |
| NR4A1      | 0.044132 |
| DNAJC25    | 0.044109 |
| IGBP1      | 0.044052 |
| RNF10      | 0.04405  |
| ARMCX2     | 0.044036 |
| DUSP13     | 0.044023 |
| KPNB1      | 0.043993 |
| DESI1      | 0.043973 |
| RSRC1      | 0.04396  |
| RNPEPL1    | 0.043958 |
| C1orf159   | 0.043954 |
| VPS9D1-AS1 | 0.04391  |
| ZNF501     | 0.043891 |
| TAF11      | 0.043849 |
| AL078644.1 | 0.043842 |
| GID8       | 0.04384  |
| COX15      | 0.043807 |
| MFSD11     | 0.043789 |
| KLHL26     | 0.04378  |
| UBN1       | 0.043756 |
| CWC27      | 0.043731 |
| H3P6       | 0.043725 |
| BRK1       | 0.043634 |
| HADHB      | 0.043629 |
| CST3       | 0.043623 |
| PPIF       | 0.043616 |
| CHMP3      | 0.043604 |
| ARFGAP1    | 0.043602 |
| SEH1L      | 0.043573 |
| CC2D1B     | 0.04357  |
| CHASERR    | 0.043545 |
| KHDRBS1    | 0.043543 |
| NCBP3      | 0.043518 |
| INA        | 0.043506 |
| TTC1       | 0.043494 |
| TMED1      | 0.043453 |
| UBE2L3     | 0.043453 |
| BCAP29     | 0.043417 |
| EIF4EBP2   | 0.043414 |
| GOLGA3     | 0.043407 |
| SCAMP4     | 0.043406 |
| SHTN1      | 0.043383 |
| SSU72      | 0.043381 |
| C1GALT1    | 0.043363 |
| RAD1       | 0.043318 |
| RRAS       | 0.043313 |

|              |          |
|--------------|----------|
| CRIM1        | 0.043277 |
| DAW1         | 0.043263 |
| HNRNPAB      | 0.043252 |
| APEH         | 0.043251 |
| FASTKD3      | 0.043204 |
| EFCAB14      | 0.043168 |
| PCGF1        | 0.043131 |
| USP19        | 0.043119 |
| BAIAP2-DT    | 0.043047 |
| MAP6D1       | 0.043041 |
| PRR12        | 0.043032 |
| SLC17A5      | 0.043018 |
| SSB          | 0.042995 |
| SEMA4C       | 0.042956 |
| WDR36        | 0.042944 |
| MED8         | 0.042919 |
| GLO1         | 0.042899 |
| IL17D        | 0.042892 |
| CNOT2        | 0.04288  |
| QPCTL        | 0.042857 |
| USP44        | 0.042809 |
| MRPL15       | 0.042808 |
| COPS8        | 0.042807 |
| ETF1         | 0.042772 |
| PNPO         | 0.042771 |
| PFDN6        | 0.042741 |
| ADH5         | 0.04274  |
| HS6ST2       | 0.042729 |
| CLCN2        | 0.042701 |
| SLC40A1      | 0.0427   |
| RAB6A        | 0.04268  |
| NUDT16L1     | 0.042674 |
| BCAR4        | 0.042666 |
| HNRNPA0      | 0.042596 |
| PRPF19       | 0.042587 |
| TMEM45A      | 0.042578 |
| ARMC6        | 0.042578 |
| DDOST        | 0.042574 |
| COG5         | 0.042532 |
| IPP          | 0.042526 |
| YBX1P1       | 0.042436 |
| CUL2         | 0.042414 |
| TRAPPC12-AS1 | 0.042385 |
| ATP5IF1      | 0.04238  |
| FLOT1        | 0.042351 |
| XDH          | 0.04232  |
| C1orf216     | 0.042276 |
| NR1H2        | 0.04227  |
| SRA1         | 0.042259 |

|            |          |
|------------|----------|
| UBIAD1     | 0.042251 |
| SCNM1      | 0.042242 |
| RBM8A      | 0.042236 |
| SLC39A13   | 0.042231 |
| BCL2L12    | 0.042223 |
| FAM120A    | 0.042213 |
| AP001453.2 | 0.042197 |
| XRCC5      | 0.042173 |
| ACO2       | 0.042154 |
| ANXA11     | 0.042151 |
| XXYLT1     | 0.042148 |
| COX17P1    | 0.042137 |
| SIAE       | 0.042112 |
| EEF2       | 0.042066 |
| DHDDS      | 0.042042 |
| B4GALT6    | 0.041992 |
| CARD11     | 0.041967 |
| POT1       | 0.041955 |
| MAFG-DT    | 0.04195  |
| SGMS1-AS1  | 0.041926 |
| CZIB       | 0.041922 |
| COA8       | 0.041921 |
| IFT22      | 0.041889 |
| HMMR       | 0.041878 |
| RPSA       | 0.041861 |
| SELENOF    | 0.041849 |
| RNF25      | 0.041847 |
| SREBF2     | 0.041846 |
| EIF2B3     | 0.041836 |
| NUP205     | 0.041826 |
| POLR3C     | 0.041731 |
| THAP4      | 0.041702 |
| PRPF38A    | 0.041659 |
| USB1       | 0.041654 |
| GTF2F2     | 0.041645 |
| MTA3       | 0.041594 |
| TPRG1L     | 0.041593 |
| GIPC1      | 0.041583 |
| PAPPA      | 0.04156  |
| MAP3K13    | 0.041556 |
| C1orf198   | 0.041522 |
| EIF3C      | 0.041514 |
| SESN2      | 0.041465 |
| DARS2      | 0.041429 |
| NMNAT1     | 0.041424 |
| AC108134.1 | 0.041404 |
| GNPTG      | 0.041392 |
| CCDC115    | 0.041383 |
| MTAP       | 0.041378 |

|            |          |
|------------|----------|
| AP005482.2 | 0.04134  |
| GIT1       | 0.041339 |
| AFMID      | 0.041325 |
| GPX4       | 0.041318 |
| CDC73      | 0.041207 |
| CUEDC2     | 0.041192 |
| UQCRHL     | 0.041178 |
| SNX12      | 0.041167 |
| PRPF40A    | 0.041151 |
| STK17A     | 0.041136 |
| TRAPPC3    | 0.041124 |
| AC011676.1 | 0.041098 |
| FAM13A     | 0.041081 |
| MTREX      | 0.041081 |
| ZNF595     | 0.041073 |
| PRPF4      | 0.041072 |
| SNAPC1     | 0.041015 |
| ARSJ       | 0.041002 |
| NRAS       | 0.040966 |
| CCDC90B    | 0.040826 |
| KRTCAP2    | 0.040809 |
| TFB2M      | 0.040763 |
| CHCHD1     | 0.040755 |
| ZNF512B    | 0.040713 |
| LAMTOR1    | 0.040709 |
| KDM4A      | 0.040704 |
| STAU1      | 0.040699 |
| CDC42EP1   | 0.040688 |
| SPPL3      | 0.04065  |
| UROD       | 0.040621 |
| MORC4      | 0.0406   |
| MIER2      | 0.040592 |
| MEMO1P1    | 0.040589 |
| TMEM43     | 0.040587 |
| ZNF771     | 0.040571 |
| PIP4K2C    | 0.040563 |
| ITPKC      | 0.040551 |
| PTPN23     | 0.040477 |
| RNF139     | 0.040456 |
| ZBED6CL    | 0.040452 |
| C6orf47    | 0.040444 |
| SUCLA2     | 0.040404 |
| CBLL1      | 0.040401 |
| FAM241B    | 0.040279 |
| ALDH4A1    | 0.040246 |
| RAB5A      | 0.040199 |
| PRR36      | 0.040178 |
| NOMO3      | 0.040155 |
| RAB20      | 0.04008  |

|           |          |
|-----------|----------|
| BTBD1     | 0.040077 |
| COSMOC    | 0.040045 |
| MAML3     | 0.03996  |
| GATAD2A   | 0.039914 |
| NEMP1     | 0.039913 |
| FADS2     | 0.039714 |
| PRMT5     | 0.039701 |
| ARHGEF2   | 0.039698 |
| TAF9      | 0.039694 |
| ARHGEF40  | 0.039684 |
| TMEM183A  | 0.039681 |
| PARG      | 0.039676 |
| CASC15    | 0.039622 |
| PSMC3     | 0.039589 |
| NDUFAF8   | 0.039576 |
| SLC25A6   | 0.039566 |
| SND1      | 0.039539 |
| GANAB     | 0.039508 |
| ACO1      | 0.039428 |
| TFAP2C    | 0.039425 |
| DUS1L     | 0.039409 |
| JDP2      | 0.039398 |
| WDR41     | 0.03939  |
| UNC5B-AS1 | 0.039389 |
| TIPRL     | 0.039381 |
| CMTM3     | 0.039362 |
| GJA1      | 0.039361 |
| ZMIZ1     | 0.039354 |
| ARHGAP40  | 0.03935  |
| RAB2A     | 0.039343 |
| KLF16     | 0.039337 |
| DNM1      | 0.039337 |
| BAP1      | 0.039324 |
| C3orf33   | 0.039289 |
| PRKAG1    | 0.039283 |
| PRELID3B  | 0.039278 |
| TLE5      | 0.039254 |
| TAF8      | 0.039206 |
| ZNF300    | 0.039187 |
| CLTC      | 0.039165 |
| TBX3      | 0.039162 |
| TMCO1     | 0.039148 |
| PPP2R1A   | 0.039143 |
| C16orf91  | 0.039104 |
| MRPL46    | 0.039073 |
| NFE2L1    | 0.03906  |
| RAB3A     | 0.039032 |
| IMMT      | 0.039029 |
| BMPR1A    | 0.039016 |

|            |          |
|------------|----------|
| DHX30      | 0.038996 |
| C12orf43   | 0.038995 |
| CNOT8      | 0.038967 |
| THG1L      | 0.038903 |
| MKRN2      | 0.038881 |
| POLR2H     | 0.038875 |
| COG2       | 0.038852 |
| PHPT1      | 0.038836 |
| RPL35      | 0.038833 |
| TSN        | 0.038827 |
| ZMAT5      | 0.038778 |
| CHCHD2P6   | 0.03872  |
| GLTP       | 0.038686 |
| FARS2      | 0.038677 |
| NR3C1      | 0.038662 |
| EIF2B1     | 0.038586 |
| AL390728.3 | 0.038563 |
| HIF1AN     | 0.038559 |
| VPS50      | 0.038556 |
| NIP7       | 0.038535 |
| NDUFA6     | 0.038516 |
| NAA35      | 0.038512 |
| YIPF2      | 0.038509 |
| DNAH17     | 0.038461 |
| ZNF777     | 0.038452 |
| AL096828.3 | 0.038451 |
| BORA       | 0.038443 |
| RNF167     | 0.038428 |
| GTF3C4     | 0.038417 |
| PTGIS      | 0.038417 |
| SNHG8      | 0.038412 |
| CAPN9      | 0.038409 |
| NECAP1     | 0.038397 |
| NDUFB2-AS1 | 0.038391 |
| EARS2      | 0.038383 |
| LINC00665  | 0.038367 |
| SLC8B1     | 0.038363 |
| TMEM168    | 0.038362 |
| PARD6B     | 0.03836  |
| PLCE1      | 0.03832  |
| FBXO28     | 0.038318 |
| COX20      | 0.038251 |
| PPP2R3A    | 0.038186 |
| MTFR2      | 0.038174 |
| PRELID1    | 0.038109 |
| PICALM     | 0.038108 |
| DDX50      | 0.038099 |
| LRRFIP1    | 0.038021 |
| MAPK1      | 0.038016 |

|              |          |
|--------------|----------|
| SPAST        | 0.038004 |
| IL1RN        | 0.038001 |
| CPE          | 0.037982 |
| TMEM254      | 0.037976 |
| ARL2         | 0.037968 |
| MRPL45       | 0.037954 |
| SQOR         | 0.037911 |
| ATP1A1       | 0.037902 |
| ADPRS        | 0.037898 |
| CAMKK1       | 0.037898 |
| SPTAN1       | 0.037883 |
| CDIPTOSP     | 0.037851 |
| STK16        | 0.03785  |
| MED9         | 0.037797 |
| MOGS         | 0.037766 |
| CYP39A1      | 0.037736 |
| HNRNPK       | 0.037722 |
| CPEB2        | 0.037708 |
| PRPS2        | 0.037702 |
| IARS1        | 0.037647 |
| CLDN10       | 0.037646 |
| PLEKHB2      | 0.037642 |
| GUF1         | 0.037605 |
| AC019080.5   | 0.037562 |
| SP1          | 0.037561 |
| DNAJB2       | 0.037509 |
| ARHGAP31-AS1 | 0.037508 |
| STN1         | 0.037498 |
| PCYT1A       | 0.037475 |
| YBX1P10      | 0.037469 |
| PIK3CB       | 0.037456 |
| LEMD1        | 0.037434 |
| ZNHIT3       | 0.037411 |
| SMARCB1      | 0.037408 |
| ETV3         | 0.037384 |
| SSH1         | 0.037383 |
| UCHL3        | 0.037345 |
| ARFRP1       | 0.037339 |
| REEP5        | 0.037314 |
| MAIP1        | 0.037281 |
| PANK1        | 0.037237 |
| GPX7         | 0.037236 |
| UST          | 0.037193 |
| CSDC2        | 0.037182 |
| UFC1         | 0.037168 |
| UBE2E1       | 0.037131 |
| G3BP2        | 0.037111 |
| TP53BP2      | 0.037105 |
| CNTROB       | 0.037094 |

|            |          |
|------------|----------|
| DXO        | 0.037088 |
| ICE1       | 0.037071 |
| LINC02257  | 0.037025 |
| MAML1      | 0.037016 |
| RNPS1      | 0.036975 |
| SUPT5H     | 0.036952 |
| BUD13      | 0.036912 |
| SORD2P     | 0.036875 |
| DNAJC30    | 0.036862 |
| SORCS2     | 0.036824 |
| CHADL      | 0.036805 |
| UBE2D4     | 0.036798 |
| NCBP2      | 0.036784 |
| RNF128     | 0.036766 |
| CARD19     | 0.036761 |
| LEMD3      | 0.036751 |
| UQCRC2     | 0.036705 |
| CCDC9      | 0.036688 |
| TRMT112    | 0.036646 |
| SAMD5      | 0.036567 |
| AC008760.1 | 0.03653  |
| PRKG1      | 0.036503 |
| SYAP1      | 0.0365   |
| AC009005.1 | 0.036482 |
| CCDC126    | 0.036439 |
| NELFCD     | 0.036422 |
| ORC2       | 0.036418 |
| CNBP       | 0.036385 |
| ABL2       | 0.036365 |
| CCDC47     | 0.036344 |
| PIGF       | 0.036313 |
| PITPNM3    | 0.036289 |
| ESS2       | 0.036249 |
| RPS27P21   | 0.036244 |
| URB2       | 0.036195 |
| ZBTB22     | 0.036166 |
| MICA       | 0.036147 |
| RPL23A     | 0.036131 |
| C1orf52    | 0.036103 |
| STK24      | 0.036086 |
| PARL       | 0.03606  |
| PTPN9      | 0.036049 |
| VWA8       | 0.03604  |
| TMEM163    | 0.036031 |
| CRCP       | 0.036009 |
| UBLCP1     | 0.035996 |
| SLC12A4    | 0.035992 |
| CREB3      | 0.035967 |
| REEP1      | 0.035952 |



|            |          |
|------------|----------|
| UTP25      | 0.035908 |
| ACAA1      | 0.035901 |
| ERO1B      | 0.035894 |
| TEX264     | 0.035886 |
| CACNA2D2   | 0.035878 |
| WNT9A      | 0.035876 |
| PIGK       | 0.035871 |
| RABL6      | 0.035863 |
| RWDD4P2    | 0.035805 |
| CFAP20     | 0.035773 |
| TRMT61A    | 0.035772 |
| ARL8B      | 0.035763 |
| CSNK1D     | 0.035733 |
| JPH1       | 0.035676 |
| PDS5A      | 0.035647 |
| FKBP8      | 0.035646 |
| TIMP1      | 0.035625 |
| PRDX5      | 0.035611 |
| ELOVL5     | 0.035593 |
| MCTS2P     | 0.035507 |
| PGBD2      | 0.03547  |
| ABHD5      | 0.035459 |
| IL20RA     | 0.035437 |
| DDB1       | 0.035432 |
| NSMCE1     | 0.035432 |
| ZSCAN25    | 0.035424 |
| SIKE1      | 0.035379 |
| FGF2       | 0.035365 |
| NFRKB      | 0.035361 |
| AC087269.1 | 0.035326 |
| ACADVL     | 0.035305 |
| SMARCC1    | 0.035301 |
| TAF1B      | 0.035296 |
| ASCC2      | 0.035286 |
| MTA1       | 0.035232 |
| CSNK2A2    | 0.035186 |
| COX7A2L    | 0.035157 |
| CCPG1      | 0.035143 |
| HSD17B8    | 0.035132 |
| NUDT5      | 0.035129 |
| CAT        | 0.035084 |
| GGT1       | 0.035068 |
| GLOD4      | 0.035049 |
| ALG12      | 0.035    |
| ATF6B      | 0.034956 |
| MREG       | 0.03494  |
| CDC34      | 0.034884 |
| DCAF12     | 0.034842 |
| NAB1       | 0.034825 |

|            |          |
|------------|----------|
| AHCY       | 0.034793 |
| ARIH1      | 0.034774 |
| LINC00511  | 0.034759 |
| SDHC       | 0.034732 |
| DOCK5      | 0.034708 |
| NIPBL      | 0.034686 |
| UBE2M      | 0.034678 |
| RPS11P5    | 0.034671 |
| AMMECR1L   | 0.03467  |
| SH3BGRL2   | 0.034656 |
| GXYLT1     | 0.034648 |
| ZDHHC9     | 0.034647 |
| RUVBL2     | 0.034588 |
| ACP1       | 0.034576 |
| SSR2       | 0.034531 |
| ZNF146     | 0.034531 |
| CDS1       | 0.034521 |
| AC131206.1 | 0.034483 |
| ZNF629     | 0.034441 |
| SAP30BP    | 0.034375 |
| STARD3NL   | 0.034368 |
| KRT8P33    | 0.034361 |
| BRD2       | 0.034344 |
| RIOK2      | 0.034324 |
| PPT2       | 0.034265 |
| OSM        | 0.034261 |
| RPF2       | 0.034206 |
| AC004943.2 | 0.034177 |
| SSRP1      | 0.034173 |
| HMCES      | 0.034134 |
| C5orf24    | 0.034115 |
| BCL7C      | 0.034055 |
| CENPN      | 0.034018 |
| HADHA      | 0.033948 |
| MRPS7      | 0.033943 |
| XPOT       | 0.033921 |
| CASTOR2    | 0.033904 |
| ALG8       | 0.033903 |
| AP3M1      | 0.033889 |
| SLC30A5    | 0.033861 |
| CHERP      | 0.033852 |
| MRPL40     | 0.03383  |
| CCZ1B      | 0.033783 |
| NCL        | 0.033735 |
| RPL19      | 0.033715 |
| MTX2       | 0.033714 |
| TIMMDC1    | 0.033708 |
| THAP10     | 0.033696 |
| PTPN11     | 0.033651 |

|            |          |
|------------|----------|
| AMPD2      | 0.033651 |
| MAPK12     | 0.033626 |
| AC233723.1 | 0.033618 |
| NT5DC3     | 0.033609 |
| MTX1       | 0.033598 |
| CHCHD5     | 0.033561 |
| RASSF6     | 0.03356  |
| RPS10      | 0.033535 |
| UTP14A     | 0.033516 |
| VAPA       | 0.033502 |
| FTSJ1      | 0.033497 |
| PNRC2P1    | 0.033482 |
| ZNF542P    | 0.03347  |
| BCKDHB     | 0.033466 |
| CDH24      | 0.033449 |
| DPY30      | 0.03342  |
| ERAL1      | 0.033406 |
| ATP5F1D    | 0.033391 |
| RAB18      | 0.033333 |
| PSPH       | 0.033305 |
| PRMT6      | 0.033263 |
| TTLL4      | 0.03325  |
| ITPR3      | 0.033225 |
| HTR7P1     | 0.033185 |
| RBBP8      | 0.033161 |
| AL133355.1 | 0.033144 |
| CAPRIN1    | 0.033129 |
| CTDSPL2    | 0.03308  |
| EIF3M      | 0.03308  |
| SH3BP4     | 0.033076 |
| WSB2       | 0.033036 |
| CALHM5     | 0.033017 |
| KHDC4      | 0.033016 |
| CTNNB1     | 0.033014 |
| FRAS1      | 0.033014 |
| RBM28      | 0.032988 |
| WDR53      | 0.032957 |
| SNRNP27    | 0.032939 |
| SLC6A6     | 0.032929 |
| CDC37      | 0.032914 |
| AL132712.1 | 0.032913 |
| MEGF9      | 0.032902 |
| RPS15      | 0.032873 |
| MAGOH      | 0.032872 |
| HOXC4      | 0.032858 |
| MYL12B     | 0.032813 |
| AC080112.1 | 0.032766 |
| ADAMTS10   | 0.032747 |
| PMS2P5     | 0.032721 |

|            |          |
|------------|----------|
| MSC        | 0.032631 |
| IRF2BP2    | 0.032626 |
| GTF2I      | 0.032624 |
| SURF2      | 0.032592 |
| UBA1       | 0.032587 |
| LMBRD2     | 0.032584 |
| HIRA       | 0.032556 |
| MYL12A     | 0.032541 |
| GULP1      | 0.032485 |
| ADHFE1     | 0.032464 |
| RAVER1     | 0.032429 |
| NDUFAF3    | 0.032367 |
| FGD4       | 0.032355 |
| TMEM248    | 0.032344 |
| WASH6P     | 0.032331 |
| SPG21      | 0.032327 |
| NR3C2      | 0.032309 |
| ARHGAP29   | 0.032282 |
| WDR13      | 0.032265 |
| POLR2E     | 0.032201 |
| AP000936.3 | 0.032173 |
| APMAP      | 0.032116 |
| RPLP1P6    | 0.032078 |
| TBX6       | 0.032069 |
| LMO7-AS1   | 0.032059 |
| MINDY2     | 0.032059 |
| TIGD5      | 0.032045 |
| HSBP1L1    | 0.032044 |
| TGFBR2     | 0.031975 |
| GNPNAT1    | 0.031939 |
| MFN2       | 0.031929 |
| EIF2D      | 0.031928 |
| HCCS       | 0.03191  |
| KRCC1      | 0.031909 |
| SMARCAL1   | 0.031873 |
| AKAP1      | 0.031844 |
| GCNA       | 0.03184  |
| KMT5A      | 0.031826 |
| POLR1H     | 0.031812 |
| BX537318.1 | 0.031805 |
| ZHX1       | 0.031795 |
| RDH13      | 0.031793 |
| ESF1       | 0.03178  |
| ZNF502     | 0.031737 |
| FBXO46     | 0.031685 |
| OSBPL5     | 0.031677 |
| HUWE1      | 0.031673 |
| STX6       | 0.031669 |
| PIGQ       | 0.031655 |

|            |          |
|------------|----------|
| SMIM10L1   | 0.031645 |
| TRIO       | 0.031635 |
| SLC35A4    | 0.031618 |
| EHD4       | 0.031605 |
| LSM5       | 0.031577 |
| FO XK1     | 0.031536 |
| SOCS6      | 0.031505 |
| TIMM17A    | 0.031481 |
| YY1        | 0.031451 |
| VDAC3      | 0.031442 |
| AC087741.2 | 0.031411 |
| RHOBTB1    | 0.031333 |
| ITPK1      | 0.031315 |
| CHAMP1     | 0.031314 |
| TARS1      | 0.031304 |
| TOB2       | 0.031299 |
| TLCD5      | 0.03129  |
| OAZ3       | 0.031271 |
| HYLS1      | 0.031212 |
| IPO13      | 0.031211 |
| HDAC5      | 0.031209 |
| CHCHD10    | 0.031202 |
| SMNDC1     | 0.031144 |
| AAAS       | 0.031096 |
| INTS11     | 0.031091 |
| IDH3A      | 0.031068 |
| NASP       | 0.03106  |
| TSEN34     | 0.031026 |
| MCCC2      | 0.031016 |
| RPL32      | 0.031007 |
| PRPF6      | 0.030971 |
| CLTCL1     | 0.030961 |
| AC023157.2 | 0.030941 |
| RHPN1-AS1  | 0.03091  |
| LGALS3     | 0.03088  |
| SUMO2P1    | 0.030858 |
| SNIP1      | 0.030805 |
| RPE        | 0.030802 |
| MPV17L     | 0.030801 |
| BNC2       | 0.030799 |
| PMPCA      | 0.03077  |
| RPL7A      | 0.030746 |
| PRKAG2     | 0.030687 |
| RSPRY1     | 0.030684 |
| NKIRAS2    | 0.030673 |
| MTSS2      | 0.030642 |
| NIF3L1     | 0.030608 |
| ZCCHC9     | 0.030602 |
| SHANK2     | 0.030585 |

|              |          |
|--------------|----------|
| RFXANK       | 0.030523 |
| LRWD1        | 0.030521 |
| ZNF639       | 0.030515 |
| POLQ         | 0.030508 |
| DHCR24       | 0.030507 |
| GTPBP6       | 0.030472 |
| SYDE2        | 0.030464 |
| FBRSL1       | 0.030409 |
| DPF2         | 0.030371 |
| ABT1         | 0.030317 |
| CIDEC1       | 0.030306 |
| BOLA2-SMG1P6 | 0.030271 |
| RAB27A       | 0.03027  |
| ITPA         | 0.030267 |
| EPRS1        | 0.030257 |
| ESD          | 0.030226 |
| AOPEP        | 0.030208 |
| VSTM2L       | 0.030133 |
| YARS1        | 0.030081 |
| CRAMP1       | 0.030079 |
| ARPC5L       | 0.030038 |
| DUSP11       | 0.030026 |
| MCM5         | 0.030007 |
| TBC1D14      | 0.029974 |
| ANTKMT       | 0.029966 |
| HNRNPU       | 0.029924 |
| SPOUT1       | 0.029923 |
| CELSR1       | 0.029917 |
| GMCL1        | 0.029911 |
| FUT10        | 0.029855 |
| JTB          | 0.029852 |
| ELP4         | 0.029846 |
| ZBED4        | 0.029802 |
| ATG16L1      | 0.029771 |
| C17orf58     | 0.029764 |
| SSR1         | 0.029762 |
| RBM42        | 0.029748 |
| KLHL7        | 0.029724 |
| AGAP3        | 0.029697 |
| VTA1         | 0.029694 |
| RRP7A        | 0.029688 |
| ABHD14B      | 0.029626 |
| TNS1         | 0.029606 |
| ARHGAP32     | 0.02957  |
| NAALADL2     | 0.029555 |
| LARGE2       | 0.029526 |
| RPL5         | 0.029426 |
| SPATA2L      | 0.029415 |
| AC133919.2   | 0.029409 |

|            |          |
|------------|----------|
| RFC2       | 0.029405 |
| RPS4XP16   | 0.029365 |
| IFITM2     | 0.029352 |
| AP002800.1 | 0.029349 |
| ENOX1      | 0.029344 |
| EMG1       | 0.02932  |
| TP53BP1    | 0.029309 |
| TMEM237    | 0.02929  |
| NOTCH2     | 0.029287 |
| CRNDE      | 0.029269 |
| GLB1       | 0.029253 |
| AKT1       | 0.029236 |
| WWC1       | 0.029234 |
| ATP6V1H    | 0.029217 |
| RMND5A     | 0.029199 |
| DCLK2      | 0.029196 |
| PAK2       | 0.029187 |
| SH3PXD2A   | 0.029156 |
| CHMP6      | 0.02915  |
| BBS4       | 0.029142 |
| ZNF518B    | 0.029134 |
| SMIM12     | 0.029127 |
| ARID3A     | 0.029112 |
| FERMT2     | 0.029101 |
| OST4       | 0.029099 |
| DHX34      | 0.029081 |
| PREP       | 0.029028 |
| USP8       | 0.029015 |
| CA5BP1     | 0.028935 |
| MARCHF5    | 0.028884 |
| CHID1      | 0.028879 |
| ELOVL6     | 0.028878 |
| NDUFS1     | 0.028856 |
| SNHG3      | 0.028854 |
| SERINC3    | 0.028803 |
| HYAL2      | 0.028777 |
| AL118511.1 | 0.028721 |
| LHPP       | 0.028661 |
| PIGW       | 0.028652 |
| MIR200A    | 0.028633 |
| PTS        | 0.028599 |
| ACSF2      | 0.02859  |
| HIGD1A     | 0.02857  |
| TMSB10     | 0.028537 |
| CYB561     | 0.028535 |
| PPM1H      | 0.028432 |
| MLLT3      | 0.028423 |
| DRG1       | 0.028409 |
| HEATR1     | 0.0284   |

|            |          |
|------------|----------|
| MARVELD2   | 0.028355 |
| AC107068.1 | 0.028327 |
| EIF4A2     | 0.028323 |
| RPL8       | 0.028286 |
| MAP1S      | 0.0282   |
| IGFALS     | 0.0282   |
| CENPL      | 0.028176 |
| RSPH3      | 0.028158 |
| GPSM2      | 0.028149 |
| UGP2       | 0.028142 |
| SLC25A39   | 0.028123 |
| ZER1       | 0.028105 |
| SMG6       | 0.028092 |
| HRAS       | 0.028073 |
| ADD1       | 0.02807  |
| HYI        | 0.02803  |
| ZSWIM1     | 0.02788  |
| PITRM1     | 0.027867 |
| CTDSP2     | 0.027823 |
| ARVCF      | 0.027821 |
| MIR22HG    | 0.027807 |
| CEP76      | 0.027807 |
| CCDC124    | 0.027774 |
| ARL3       | 0.027766 |
| MIR103A2   | 0.027719 |
| G6PC3      | 0.027674 |
| NAT10      | 0.02767  |
| SLC66A1    | 0.027623 |
| PARD6G     | 0.027612 |
| ALG1L6P    | 0.027569 |
| CUL4B      | 0.027562 |
| PAF1       | 0.027508 |
| TBK1       | 0.027485 |
| DNPH1      | 0.027445 |
| MRPS16     | 0.027404 |
| CDAN1      | 0.02739  |
| FAM172BP   | 0.027385 |
| NOL6       | 0.027377 |
| BET1       | 0.027358 |
| PEX7       | 0.027349 |
| UCHL5      | 0.027335 |
| AIMP2      | 0.02733  |
| ATMIN      | 0.027303 |
| IFRD1      | 0.027279 |
| SNRPN      | 0.027272 |
| GPRC5B     | 0.02724  |
| CALM3      | 0.027236 |
| CMPK1      | 0.027223 |
| ESRP2      | 0.027221 |



|            |          |
|------------|----------|
| RPL21P119  | 0.027217 |
| HDDC3      | 0.027205 |
| STOML2     | 0.027183 |
| NBPF2P     | 0.027177 |
| BRME1      | 0.027162 |
| BROX       | 0.027141 |
| VKORC1L1   | 0.027137 |
| KARS1      | 0.027132 |
| ER11       | 0.027131 |
| ATXN7L3    | 0.027127 |
| CDC23      | 0.027041 |
| DLK1       | 0.027036 |
| LTA4H      | 0.027033 |
| CD63       | 0.027028 |
| UTP6       | 0.027023 |
| SERP2      | 0.026975 |
| FASTK      | 0.026956 |
| MIOX       | 0.026952 |
| WDR75      | 0.026936 |
| OSR1       | 0.026934 |
| PTBP3      | 0.026905 |
| FANCC      | 0.026904 |
| INCENP     | 0.026888 |
| LSM3       | 0.026877 |
| SLC43A2    | 0.026873 |
| PATZ1      | 0.026872 |
| SEMA4F     | 0.026862 |
| ZMYND8     | 0.026837 |
| SAE1       | 0.02681  |
| THRAP3     | 0.026767 |
| FUBP3      | 0.026751 |
| PPIE       | 0.026713 |
| ENPEP      | 0.026703 |
| EXOC7      | 0.026661 |
| GDPGP1     | 0.026656 |
| ATXN2      | 0.026631 |
| USP42      | 0.026625 |
| AC073073.2 | 0.026616 |
| PTRH2      | 0.026608 |
| YDJC       | 0.026605 |
| ZNF610     | 0.026547 |
| HTT        | 0.026516 |
| AC099518.6 | 0.026476 |
| THSD7A     | 0.026447 |
| HMGA1P5    | 0.026442 |
| PUDP       | 0.02644  |
| AC092718.3 | 0.026425 |
| SRP14-AS1  | 0.026397 |
| PML        | 0.026391 |

|            |          |
|------------|----------|
| OVOL2      | 0.026389 |
| CALML4     | 0.026385 |
| CIC        | 0.026384 |
| ZSCAN16    | 0.026338 |
| TIRAP      | 0.026318 |
| EDA2R      | 0.026283 |
| NUTM2A-AS1 | 0.026276 |
| ACADM      | 0.026273 |
| MAN2A2     | 0.026264 |
| TMEM127    | 0.026256 |
| RTL8C      | 0.026208 |
| AC007773.1 | 0.0262   |
| PSPN       | 0.026197 |
| PUS1       | 0.026191 |
| AL590560.3 | 0.026171 |
| NT5C2      | 0.02616  |
| SP2-AS1    | 0.026138 |
| MELK       | 0.026137 |
| NDUFC1     | 0.026116 |
| ATP6V1E2   | 0.026054 |
| MRPL49     | 0.026054 |
| ZFP69B     | 0.026051 |
| DNAJB1     | 0.026043 |
| OPLAH      | 0.025974 |
| GTPBP10    | 0.025946 |
| HRH2       | 0.02586  |
| CHTOP      | 0.02583  |
| RAB27B     | 0.025803 |
| RTN3       | 0.025802 |
| AC005034.5 | 0.025763 |
| KIF15      | 0.025721 |
| EEFSEC     | 0.025709 |
| ABHD3      | 0.025707 |
| ANKRD40    | 0.025687 |
| PHF5A      | 0.025668 |
| ASMTL      | 0.025647 |
| TXLNA      | 0.025636 |
| NUDT12     | 0.02563  |
| BPNT1      | 0.025625 |
| ADNP       | 0.025594 |
| CORO1B     | 0.025517 |
| MAP11      | 0.025472 |
| PRKRIP1    | 0.025403 |
| NUMA1      | 0.025391 |
| PIP4K2B    | 0.02538  |
| ELAVL1     | 0.025367 |
| CYTH2      | 0.025351 |
| RNF135     | 0.025344 |
| DDX59      | 0.025309 |

|            |          |
|------------|----------|
| RPL6       | 0.02529  |
| AL139289.1 | 0.025289 |
| CITED2     | 0.025233 |
| TROAP      | 0.025225 |
| WNT3       | 0.025195 |
| Z84485.1   | 0.025183 |
| CLYBL      | 0.02518  |
| SNRNP200   | 0.025164 |
| HAGHL      | 0.025163 |
| MAPKAP1    | 0.025131 |
| FEZ2       | 0.025127 |
| ZNF532     | 0.025108 |
| RAB34      | 0.025075 |
| PEX14      | 0.025033 |
| KRTAP5-AS1 | 0.025033 |
| DPH6       | 0.025017 |
| NUP54      | 0.024977 |
| ZNF778     | 0.024976 |
| NRBF2      | 0.024974 |
| BRD1       | 0.024958 |
| SYF2       | 0.024957 |
| LMLN       | 0.024933 |
| ASAP1      | 0.024891 |
| NKAPD1     | 0.024876 |
| UGGT1      | 0.024867 |
| AQP3       | 0.024865 |
| CNP        | 0.024859 |
| PIP5K1C    | 0.024843 |
| TOP2A      | 0.024839 |
| INTS14     | 0.024796 |
| RCC2       | 0.024761 |
| NOM1       | 0.024705 |
| GOLIM4     | 0.024701 |
| BET1L      | 0.024681 |
| TIMM17B    | 0.024654 |
| SEPTIN7    | 0.024643 |
| MRPL1      | 0.024597 |
| SVIL-AS1   | 0.024517 |
| AC011979.1 | 0.0245   |
| TRIM65     | 0.024463 |
| SRFBP1     | 0.024452 |
| FRK        | 0.024446 |
| PEX26      | 0.024422 |
| ZNF71      | 0.024391 |
| CYB561D2   | 0.024385 |
| TLE1P1     | 0.024384 |
| HSPA5      | 0.02436  |
| CEP20      | 0.024332 |
| UBL7       | 0.02433  |

|            |          |
|------------|----------|
| STAT6      | 0.024329 |
| FTLP2      | 0.024323 |
| LONP1      | 0.024278 |
| MVB12A     | 0.024277 |
| A4GALT     | 0.024274 |
| C11orf54   | 0.024205 |
| LINC01270  | 0.024186 |
| ODR4       | 0.024167 |
| ST6GALNAC2 | 0.024146 |
| ARRDC4     | 0.024139 |
| ALOX12P2   | 0.024104 |
| CNFN       | 0.024102 |
| PPP2R1B    | 0.024092 |
| RNF187     | 0.024037 |
| PPCS       | 0.024007 |
| ZNF664     | 0.023972 |
| RMI2       | 0.023965 |
| MAP3K6     | 0.023959 |
| TACO1      | 0.023952 |
| DNAJB5     | 0.023905 |
| MOB4       | 0.023877 |
| HNRNPUL1   | 0.023851 |
| MDC1       | 0.023848 |
| DHRS13     | 0.023793 |
| TMEM167B   | 0.023788 |
| UBE2D1     | 0.023787 |
| AC026740.1 | 0.023782 |
| U52111.1   | 0.02376  |
| GIGYF1     | 0.023715 |
| LRP5       | 0.023641 |
| MNX1-AS2   | 0.023636 |
| CAPNS1     | 0.023614 |
| EIF2S2     | 0.023581 |
| CCNI2      | 0.023543 |
| RPS10P7    | 0.023538 |
| HMGN3-AS1  | 0.023507 |
| YWHAB      | 0.023479 |
| LMAN2      | 0.023477 |
| TADA3      | 0.023474 |
| MRPS12     | 0.023407 |
| CEMIP2     | 0.023379 |
| SMIM30     | 0.023368 |
| TTF1       | 0.023351 |
| MIGA1      | 0.023344 |
| PHKB       | 0.023343 |
| CUL3       | 0.023336 |
| CCNB2      | 0.023333 |
| CDC123     | 0.023316 |
| USP13      | 0.023307 |

|            |          |
|------------|----------|
| ERGIC3     | 0.023291 |
| ZNF513     | 0.023266 |
| NOP58      | 0.023257 |
| WDR45B     | 0.023221 |
| SCRN3      | 0.023221 |
| NUTF2      | 0.023218 |
| IREB2      | 0.02321  |
| COPS9      | 0.023206 |
| SKA1       | 0.02319  |
| AP001318.2 | 0.023169 |
| SLC38A7    | 0.023159 |
| ILRUN-AS1  | 0.023139 |
| MED17      | 0.023131 |
| RHNO1      | 0.023127 |
| MTIF2      | 0.023104 |
| AP3B1      | 0.023103 |
| DDRKG1     | 0.023059 |
| CLIP4      | 0.023007 |
| LRRC45     | 0.023004 |
| PAFAH2     | 0.022998 |
| RPN2       | 0.022985 |
| PARP16     | 0.022979 |
| LINC02004  | 0.022927 |
| PLCXD1     | 0.022916 |
| RPS6KB1    | 0.022909 |
| RBM48      | 0.022891 |
| METTL7B    | 0.022876 |
| NRSN2      | 0.022771 |
| WIF1       | 0.022745 |
| BCAP31     | 0.022685 |
| TAF7       | 0.022684 |
| POLDIP3    | 0.022672 |
| HSP90AA1   | 0.022657 |
| BSPRY      | 0.022648 |
| RAP1B      | 0.022621 |
| GOPC       | 0.022614 |
| ZNF618     | 0.022576 |
| DDX52      | 0.022563 |
| ARHGEF11   | 0.022549 |
| DISP1      | 0.022538 |
| PURB       | 0.022493 |
| PABPC1     | 0.022486 |
| ELOA       | 0.022454 |
| RBM14      | 0.022444 |
| CTNS       | 0.022434 |
| PABPC4     | 0.022415 |
| NUP50      | 0.022397 |
| AC124283.2 | 0.022392 |
| LBX2       | 0.022373 |

|            |          |
|------------|----------|
| MRPL20-AS1 | 0.022368 |
| VPS39      | 0.022366 |
| ZNF865     | 0.022364 |
| TRMT6      | 0.022331 |
| HHLA3      | 0.022304 |
| FAM171B    | 0.022283 |
| SPDEF      | 0.022279 |
| IFITM3P2   | 0.022247 |
| PPP1CB     | 0.022222 |
| MRPL17     | 0.02222  |
| FNTA       | 0.022213 |
| PSMF1      | 0.022212 |
| PSMC1P1    | 0.02217  |
| KCTD1      | 0.022148 |
| LINC01123  | 0.022109 |
| SPATA2     | 0.022108 |
| ARL2BP     | 0.022108 |
| RNF216P1   | 0.022036 |
| MRPS26     | 0.022003 |
| PIM1       | 0.022003 |
| SMARCD1    | 0.021963 |
| WDR18      | 0.02196  |
| HLTF       | 0.02193  |
| SQSTM1     | 0.021921 |
| PTEN       | 0.021912 |
| SNRPA1     | 0.021891 |
| DYNC2I1    | 0.021884 |
| MRPL58     | 0.021868 |
| BACE1      | 0.02185  |
| CS         | 0.02181  |
| RGMB       | 0.021795 |
| SLC35B3    | 0.021678 |
| TMEM186    | 0.021661 |
| AC026412.1 | 0.02165  |
| ADAR       | 0.021637 |
| NSUN4      | 0.021618 |
| RPL27      | 0.021609 |
| LSM14B     | 0.021604 |
| RPL22      | 0.021556 |
| SCT        | 0.021541 |
| ZDHHC3     | 0.021534 |
| PSMD8      | 0.021532 |
| ZSWIM7     | 0.021525 |
| HS2ST1     | 0.021524 |
| MCRS1      | 0.021491 |
| SLC35C2    | 0.021474 |
| NCOR1      | 0.021454 |
| GTF3C5     | 0.021408 |
| NUDT21     | 0.021392 |

|              |          |
|--------------|----------|
| BOLA1        | 0.02139  |
| RPS14        | 0.021384 |
| AC016727.1   | 0.021384 |
| STARD10      | 0.021374 |
| EPB41L4A-AS1 | 0.021366 |
| OXCT1        | 0.021362 |
| AC106738.1   | 0.021305 |
| FAM136A      | 0.0213   |
| AHCTF1       | 0.021271 |
| HDAC6        | 0.021264 |
| TMEM123      | 0.021237 |
| NDN          | 0.021201 |
| NDUFS8       | 0.02118  |
| RPS4XP22     | 0.021102 |
| LINC02777    | 0.021084 |
| KCP          | 0.021083 |
| YIPF6        | 0.021074 |
| NDUFA5       | 0.021049 |
| METTL27      | 0.021034 |
| AIG1         | 0.021025 |
| CNNM3        | 0.021005 |
| IRX6         | 0.021    |
| TRPC4AP      | 0.020997 |
| AP003119.2   | 0.020958 |
| EIF3E        | 0.020953 |
| AL162258.2   | 0.020952 |
| RPP30        | 0.020944 |
| SOD1         | 0.020941 |
| MPV17        | 0.020933 |
| UBC          | 0.020905 |
| LEMD2        | 0.020888 |
| LINC00339    | 0.020853 |
| POLR2M       | 0.020833 |
| SLC25A43     | 0.020828 |
| TMA16        | 0.020821 |
| SMARCD3      | 0.020816 |
| BRCA1        | 0.020805 |
| COPS3        | 0.020754 |
| RPS12        | 0.020751 |
| UNC13D       | 0.020737 |
| SPCS2P4      | 0.020724 |
| ASAP3        | 0.020625 |
| DNAJC11      | 0.020622 |
| AAR2         | 0.020617 |
| EEF1A1P19    | 0.020559 |
| CDPF1        | 0.020557 |
| RBM7         | 0.020545 |
| TM2D3        | 0.020497 |
| CTBP1-DT     | 0.020497 |

|            |          |
|------------|----------|
| USP36      | 0.020477 |
| GLRX5      | 0.020444 |
| ATXN7L3B   | 0.020435 |
| SEC24B     | 0.020434 |
| OIP5-AS1   | 0.020389 |
| GSTCD      | 0.020377 |
| DMRTA2     | 0.020373 |
| PKD2       | 0.020367 |
| GALNT7     | 0.020357 |
| HMGB1P6    | 0.020342 |
| FNTB       | 0.020336 |
| TRAM2      | 0.020283 |
| SLC25A15   | 0.02024  |
| ZNF468     | 0.020222 |
| ZNF561-AS1 | 0.020218 |
| SREBF1     | 0.020217 |
| CXorf56    | 0.020216 |
| TMEM45B    | 0.020211 |
| LRRC40     | 0.020167 |
| PRR5       | 0.020164 |
| CHCHD4     | 0.02015  |
| SH3KBP1    | 0.020122 |
| ABRAXAS2   | 0.020082 |
| CDKN2AIP   | 0.020037 |
| THRA       | 0.020028 |
| FGD5-AS1   | 0.020016 |
| TRIM37     | 0.019917 |
| AMFR       | 0.019901 |
| KAT5       | 0.019843 |
| TRIM39     | 0.019774 |
| TSPAN6     | 0.019761 |
| SRRD       | 0.019744 |
| SELENON    | 0.019735 |
| CCDC91     | 0.019725 |
| PPP1R15B   | 0.01969  |
| HNRNPR     | 0.019682 |
| HSPB2      | 0.019675 |
| ERCC3      | 0.019673 |
| PAPSS1     | 0.019647 |
| BCCIP      | 0.019638 |
| CAPZA1     | 0.019636 |
| TPRKB      | 0.019617 |
| AC141586.1 | 0.019604 |
| PJA2       | 0.019588 |
| FBXO36     | 0.019581 |
| IL27RA     | 0.019577 |
| TOPBP1     | 0.01957  |
| PEMT       | 0.019556 |
| TGS1       | 0.019503 |



|                |          |
|----------------|----------|
| VEZF1          | 0.019454 |
| DHTKD1         | 0.019428 |
| ZNF784         | 0.019417 |
| AP000704.1     | 0.019366 |
| LSM11          | 0.019358 |
| RTF2           | 0.019357 |
| AKR7L          | 0.019315 |
| ISOC1          | 0.019301 |
| ZZZ3           | 0.019279 |
| TP53TG1        | 0.019238 |
| LSM2           | 0.019227 |
| KLHDC8A        | 0.01921  |
| ANKRD11        | 0.019184 |
| YY1AP1         | 0.019177 |
| MRPL19         | 0.019163 |
| XPO1           | 0.019097 |
| TEX261         | 0.019089 |
| SPTY2D1        | 0.019084 |
| AMY2B          | 0.019065 |
| RARS2          | 0.019043 |
| PACSIN1        | 0.019035 |
| ZNRF1          | 0.018992 |
| TMEM185B       | 0.018984 |
| MMP7           | 0.018976 |
| AC026356.1     | 0.01897  |
| ZNF787         | 0.018953 |
| HERC4          | 0.018936 |
| MGRN1          | 0.018891 |
| RPL13          | 0.018886 |
| C2orf76        | 0.018874 |
| TMEM177        | 0.018846 |
| HMGB1P5        | 0.018832 |
| MFSD3          | 0.018827 |
| BAG5           | 0.018774 |
| PTOV1          | 0.018771 |
| PTH1R          | 0.018759 |
| MYO1D          | 0.018758 |
| HPS3           | 0.018742 |
| TMEM128        | 0.018721 |
| DGKD           | 0.0187   |
| EP300          | 0.018691 |
| FST            | 0.018658 |
| ATP23          | 0.01864  |
| C4orf36        | 0.018623 |
| METTL23        | 0.018614 |
| WDR55          | 0.01861  |
| AC007382.1     | 0.0186   |
| ARMCX5-GPRASP2 | 0.018584 |
| LMO4           | 0.018574 |

|            |          |
|------------|----------|
| ATPAF2     | 0.018567 |
| DCAF6      | 0.018564 |
| ATAD1      | 0.018558 |
| PPARA      | 0.01853  |
| ABHD14A    | 0.018485 |
| CCL13      | 0.01844  |
| SLC49A3    | 0.018405 |
| AL391903.1 | 0.018383 |
| GOSR1      | 0.018365 |
| EXOC2      | 0.018356 |
| RPL36      | 0.018354 |
| G3BP1      | 0.018336 |
| ZFY        | 0.018288 |
| ENTPD3-AS1 | 0.018269 |
| RPL17P36   | 0.018236 |
| BUB3       | 0.018204 |
| WDR74      | 0.018192 |
| KIF5B      | 0.018187 |
| NTN1       | 0.018183 |
| CARMIL1    | 0.01817  |
| PYROXD2    | 0.018157 |
| NSDHL      | 0.018087 |
| AC006511.3 | 0.018061 |
| TM9SF2     | 0.018033 |
| PACS1      | 0.018027 |
| MAP2K7     | 0.018016 |
| CCDC6      | 0.017983 |
| EXO5       | 0.017968 |
| COX5BP6    | 0.017917 |
| OR7E38P    | 0.017894 |
| UBE2Q2     | 0.017884 |
| PRPF3      | 0.017878 |
| DPH5       | 0.017877 |
| CLPTM1     | 0.017844 |
| MARVELD3   | 0.017837 |
| RNF41      | 0.017812 |
| ZNF746     | 0.01777  |
| DUSP4      | 0.017765 |
| ANAPC15    | 0.017727 |
| UFSP2      | 0.017721 |
| EGFLAM     | 0.017693 |
| RRM1       | 0.017659 |
| CDC7       | 0.017655 |
| ZNF581     | 0.017616 |
| SETMAR     | 0.017579 |
| MSMO1      | 0.017562 |
| GEMIN8P4   | 0.017562 |
| GPAA1      | 0.017536 |
| MRM1       | 0.017527 |

|           |          |
|-----------|----------|
| EEPD1     | 0.017499 |
| TRIP12    | 0.01749  |
| CSRNP2    | 0.017485 |
| TMEM121   | 0.017482 |
| RAD21     | 0.017427 |
| FBXW4     | 0.01737  |
| LGSN      | 0.017366 |
| E2F4      | 0.017302 |
| PWP1      | 0.017301 |
| SYNGR2    | 0.017299 |
| CBX5      | 0.017297 |
| LMO7      | 0.017288 |
| PSMA5     | 0.01728  |
| HPF1      | 0.017253 |
| LYPD1     | 0.017237 |
| KLF15     | 0.017235 |
| MICU1     | 0.01722  |
| PSMG4     | 0.017207 |
| LPCAT3    | 0.017201 |
| NDUFV1    | 0.017184 |
| PRLR      | 0.017183 |
| EIF4G3    | 0.017177 |
| LINC00957 | 0.017107 |
| RAB22A    | 0.017099 |
| COPB1     | 0.017099 |
| EIF2S1    | 0.017098 |
| ZNF140    | 0.017089 |
| ZDHHC5    | 0.017067 |
| RAD50     | 0.017049 |
| ZNF76     | 0.017036 |
| REST      | 0.016996 |
| POLR1D    | 0.016989 |
| YPEL1     | 0.016975 |
| NUDT14    | 0.016974 |
| NUP85     | 0.016957 |
| FBXO4     | 0.01695  |
| FAM185A   | 0.016879 |
| PCDHB9    | 0.01686  |
| DLGAP4    | 0.016842 |
| TEX10     | 0.016834 |
| DHX15     | 0.01683  |
| UFM1      | 0.016823 |
| RABIF     | 0.016814 |
| SUSD4     | 0.016704 |
| OSBP      | 0.016691 |
| IFFO2     | 0.016677 |
| PPP4C     | 0.016639 |
| DPH1      | 0.016636 |
| GUCD1     | 0.016625 |

|             |          |
|-------------|----------|
| TIMM23      | 0.016623 |
| F2RL3       | 0.016606 |
| ACBD5       | 0.016595 |
| LINC00513   | 0.016546 |
| SNRPB       | 0.016518 |
| CLDN3       | 0.016503 |
| NABP2       | 0.016449 |
| ZBTB8A      | 0.016437 |
| DPYSL3      | 0.016411 |
| RAD51C      | 0.016375 |
| LRRC58      | 0.016367 |
| PITHD1      | 0.016343 |
| ECD         | 0.016321 |
| CCDC15      | 0.016312 |
| TUFM        | 0.016307 |
| SLC19A1     | 0.016289 |
| CHM         | 0.016275 |
| RHOA        | 0.016274 |
| GGPS1       | 0.016251 |
| HINFP       | 0.016241 |
| TESK1       | 0.01624  |
| SHLD2       | 0.01622  |
| MKRN1       | 0.016185 |
| SLC14A1     | 0.016178 |
| APOOL       | 0.016178 |
| AC005288.1  | 0.016173 |
| MAPK3       | 0.016162 |
| KYAT1       | 0.016147 |
| THUMPD2     | 0.016143 |
| PSRC1       | 0.016082 |
| FAM193A     | 0.016049 |
| PPP1R26-AS1 | 0.015992 |
| KANSL2      | 0.015964 |
| RPL7        | 0.01595  |
| TUSC2       | 0.015943 |
| RFTN1       | 0.015936 |
| DENR        | 0.01591  |
| UBE2F       | 0.015899 |
| DOP1B       | 0.015876 |
| MFSD6L      | 0.015869 |
| ITGA9       | 0.015852 |
| CAPN5       | 0.015837 |
| PDRG1       | 0.015834 |
| VLDLR       | 0.015829 |
| UBE4A       | 0.015815 |
| SRGAP2C     | 0.015804 |
| DMAC2       | 0.015734 |
| MYL6        | 0.015731 |
| RAB32       | 0.015688 |

|            |          |
|------------|----------|
| CNOT6      | 0.015679 |
| FEM1B      | 0.015677 |
| C11orf45   | 0.015676 |
| MIR589     | 0.01567  |
| RBM22      | 0.015641 |
| PRPSAP1    | 0.015627 |
| EBF4       | 0.015592 |
| NUDCD2     | 0.015577 |
| AC099850.1 | 0.015576 |
| C15orf40   | 0.015575 |
| UPF1       | 0.015562 |
| ZNF691     | 0.015554 |
| MIER3      | 0.015554 |
| RWDD4      | 0.015543 |
| MGST2      | 0.015532 |
| COX7A1     | 0.015523 |
| NAT9       | 0.015494 |
| MICOS10P3  | 0.015492 |
| MRPL32     | 0.015489 |
| KXD1       | 0.015434 |
| PLXNB3     | 0.015378 |
| WRAP53     | 0.015325 |
| PCGF2      | 0.015269 |
| ZG16B      | 0.015262 |
| BLOC1S3    | 0.015241 |
| TCF3       | 0.015211 |
| CDK13      | 0.015187 |
| BAZ1B      | 0.015166 |
| HMG20A     | 0.015152 |
| RAB5C      | 0.015137 |
| B4GALT7    | 0.015113 |
| C1D        | 0.015111 |
| TMEM141    | 0.015105 |
| RAE1       | 0.015095 |
| MID1       | 0.015087 |
| CENPW      | 0.01508  |
| TMTC1      | 0.015076 |
| RAB3D      | 0.015031 |
| RRP15      | 0.015031 |
| STRN       | 0.015015 |
| RNMT       | 0.015014 |
| PDXDC1     | 0.014998 |
| PDCD2L     | 0.014991 |
| DDX49      | 0.014979 |
| SECTM1     | 0.014955 |
| TFPI2      | 0.014946 |
| VASH2      | 0.014897 |
| UBE2Z      | 0.014889 |
| AC004923.4 | 0.014878 |

|            |          |
|------------|----------|
| CENPB      | 0.014861 |
| SLC35D1    | 0.014773 |
| SORT1      | 0.014725 |
| RPN1       | 0.014677 |
| ZC4H2      | 0.014671 |
| TSPAN4     | 0.014621 |
| SLC29A2    | 0.014579 |
| KRBA1      | 0.014565 |
| MED14      | 0.014555 |
| CHTF18     | 0.014476 |
| SOCS5      | 0.014418 |
| POLE4      | 0.014412 |
| C6orf120   | 0.014406 |
| UBTF       | 0.014405 |
| TOR1B      | 0.014395 |
| RPS27      | 0.014393 |
| DPEP1      | 0.014361 |
| SHROOM3    | 0.01434  |
| CMTM1      | 0.01429  |
| QTRT2      | 0.014289 |
| STAG3L4    | 0.014239 |
| OXSM       | 0.01423  |
| TNKS2-AS1  | 0.014227 |
| CYB5A      | 0.014212 |
| MEAF6      | 0.014211 |
| PAAF1      | 0.014204 |
| TAF5L      | 0.014195 |
| KLC2       | 0.014173 |
| LARS1      | 0.01417  |
| PHACTR4    | 0.014139 |
| FUBP1      | 0.014134 |
| EIF4E2     | 0.014058 |
| ZC3H13     | 0.014053 |
| LARS2      | 0.014049 |
| ARMT1      | 0.014039 |
| POLL       | 0.01403  |
| CCDC71L    | 0.014003 |
| SYNCRIP    | 0.013994 |
| CPSF3      | 0.013982 |
| PFN1       | 0.013979 |
| FBXO5      | 0.013957 |
| HSPD1      | 0.013953 |
| NORAD      | 0.01391  |
| AEBP2      | 0.01386  |
| COG8       | 0.01386  |
| USP39      | 0.013851 |
| C6orf226   | 0.01385  |
| ZNF204P    | 0.013837 |
| AL031602.1 | 0.013795 |

|            |          |
|------------|----------|
| ZNF544     | 0.013794 |
| GTF2F1     | 0.013786 |
| GLRX       | 0.013783 |
| NUP37      | 0.013768 |
| BBOX1-AS1  | 0.013762 |
| SNPH       | 0.013758 |
| LINC01612  | 0.013757 |
| ABCB8      | 0.013749 |
| ELP6       | 0.013725 |
| FKBP2      | 0.013701 |
| USP21      | 0.013694 |
| MRPL20     | 0.013689 |
| SLC9A3-AS1 | 0.013683 |
| GSTZ1      | 0.013674 |
| CIAO3      | 0.01367  |
| KLHL42     | 0.013636 |
| RETREG3    | 0.013588 |
| IGFBP4     | 0.013587 |
| AGPAT2     | 0.013584 |
| TERF2      | 0.013556 |
| DNAJC19    | 0.013555 |
| PPP2CB     | 0.013548 |
| TONSL      | 0.013512 |
| ROCK2      | 0.013492 |
| AC067838.1 | 0.013462 |
| MTFMT      | 0.013446 |
| ZDHHC20    | 0.013421 |
| NEURL1B    | 0.013372 |
| RAB43      | 0.013334 |
| COX5A      | 0.013331 |
| RPL28      | 0.013276 |
| MYPOP      | 0.013274 |
| WDR4       | 0.013229 |
| TMEM88     | 0.01322  |
| AL035461.2 | 0.013201 |
| RNY3P8     | 0.013178 |
| TRPT1      | 0.01316  |
| CACYBP     | 0.013137 |
| CDK18      | 0.013111 |
| GPR161     | 0.013107 |
| AGFG2      | 0.013098 |
| LINC00261  | 0.013082 |
| MRPL22     | 0.013079 |
| DNMBP-AS1  | 0.013051 |
| ENG        | 0.013048 |
| LINC01128  | 0.013032 |
| ZSCAN29    | 0.013029 |
| GATAD1     | 0.012992 |
| SGTA       | 0.012947 |

|            |          |
|------------|----------|
| ECSIT      | 0.012946 |
| ACBD3      | 0.012934 |
| AC092071.1 | 0.012934 |
| KAT14      | 0.012916 |
| FOXP1      | 0.01291  |
| EEF1E1     | 0.01291  |
| MBTPS1     | 0.012881 |
| TMCC1      | 0.012864 |
| ERCC8      | 0.012846 |
| ANKRD17    | 0.012839 |
| FOXRED1    | 0.012838 |
| MAPRE1     | 0.012838 |
| NDUFA4     | 0.012832 |
| NCBP1      | 0.012794 |
| THUMPD3    | 0.012782 |
| ENAH       | 0.012702 |
| FAM149B1   | 0.012686 |
| POLR3A     | 0.012685 |
| H3P36      | 0.012682 |
| RPAP3      | 0.012672 |
| ANAPC16    | 0.012619 |
| TMEM263    | 0.012603 |
| GNAS       | 0.012583 |
| BORCS7     | 0.012562 |
| GNG10      | 0.012552 |
| ZNF256     | 0.012552 |
| AC009318.3 | 0.012502 |
| RPL29P11   | 0.012484 |
| LPP        | 0.012476 |
| FAM210B    | 0.012465 |
| NDUFAB1    | 0.01236  |
| SLC39A4    | 0.012349 |
| C10orf88B  | 0.012338 |
| DCAF1      | 0.012261 |
| RPL5P4     | 0.01223  |
| PLEKHA8    | 0.012201 |
| SRP19      | 0.012191 |
| AC007383.1 | 0.012184 |
| GNPAT      | 0.012179 |
| AP3D1      | 0.012162 |
| GSK3B      | 0.012159 |
| DYNLL1     | 0.012143 |
| FER        | 0.012142 |
| SHPK       | 0.012128 |
| WDHD1      | 0.012098 |
| THAP1      | 0.012036 |
| ZNF524     | 0.012027 |
| ADO        | 0.01202  |
| GPI        | 0.012004 |



|            |          |
|------------|----------|
| RIPK4      | 0.011976 |
| H2BC15     | 0.011961 |
| CYCSP34    | 0.01196  |
| CAST       | 0.011881 |
| CST5       | 0.011861 |
| KEAP1      | 0.011858 |
| OPA1       | 0.011839 |
| ZNF813     | 0.011809 |
| ZFAND5     | 0.011806 |
| ZSWIM9     | 0.011798 |
| DNAJC8     | 0.011798 |
| STXBP5     | 0.011793 |
| GMPPA      | 0.011779 |
| RBMS3-AS3  | 0.011759 |
| EIF3L      | 0.01175  |
| CFI        | 0.011719 |
| HTRA2      | 0.011669 |
| RAB21      | 0.011655 |
| ZC3H18     | 0.011648 |
| GTF3C1     | 0.011638 |
| AC093535.2 | 0.01162  |
| ZNF883     | 0.011587 |
| TMEM94     | 0.011567 |
| BECN1      | 0.011549 |
| TFCP2      | 0.011545 |
| STPG1      | 0.01154  |
| RMDN3      | 0.011527 |
| NAA60      | 0.011476 |
| CDYL2      | 0.011472 |
| LYVE1      | 0.01147  |
| IPMK       | 0.011445 |
| UMAD1      | 0.011439 |
| GEMIN6     | 0.011439 |
| AP5B1      | 0.011368 |
| SNRNP25    | 0.011347 |
| CDIPT      | 0.011338 |
| FIZ1       | 0.011331 |
| IPO11      | 0.011292 |
| ARHGEF12   | 0.011279 |
| BBS7       | 0.011268 |
| EBP        | 0.011265 |
| ZNF626     | 0.011256 |
| ZBTB10     | 0.01124  |
| EHD1       | 0.011203 |
| TMCO6      | 0.011163 |
| PPTC7      | 0.011042 |
| HSPBP1     | 0.011012 |
| MTG2       | 0.011004 |
| MRPL55     | 0.010964 |

|            |          |
|------------|----------|
| NDUFA2     | 0.010947 |
| COX7CP1    | 0.010898 |
| AC107027.3 | 0.010896 |
| PDE2A      | 0.010872 |
| FBXL13     | 0.010769 |
| PCDHB8     | 0.010731 |
| MCTP2      | 0.010713 |
| SNX19      | 0.010712 |
| SYNJ2      | 0.010695 |
| SRGAP2     | 0.010678 |
| AL513477.2 | 0.010673 |
| SLC7A10    | 0.010639 |
| MED19      | 0.010627 |
| NOXA1      | 0.010564 |
| LMNTD2     | 0.010551 |
| AC020915.2 | 0.010547 |
| HMGXB4     | 0.010541 |
| NXPH3      | 0.010541 |
| AC104447.1 | 0.010537 |
| CENPJ      | 0.010529 |
| ARID1A     | 0.010521 |
| MED1       | 0.010521 |
| DCLRE1B    | 0.010511 |
| BOLA3      | 0.010505 |
| ZSCAN22    | 0.010498 |
| ZNF670     | 0.010485 |
| WDCP       | 0.010478 |
| MYBL2      | 0.010454 |
| NXT2       | 0.010439 |
| NME6       | 0.010423 |
| FKBP1B     | 0.010422 |
| BPNT2      | 0.010415 |
| TMEM230    | 0.01039  |
| SLC66A3    | 0.010364 |
| RTCB       | 0.01035  |
| ACD        | 0.010349 |
| SCOC       | 0.010347 |
| BRAP       | 0.010337 |
| NSF        | 0.010337 |
| VAPB       | 0.010328 |
| CHST10     | 0.010325 |
| TBCA       | 0.010316 |
| DNA2       | 0.010303 |
| BBX        | 0.010262 |
| ZFAND2A    | 0.010213 |
| LDHB       | 0.01021  |
| ATP5MD     | 0.010198 |
| C1orf50    | 0.010179 |
| ZBTB45     | 0.010154 |

|            |          |
|------------|----------|
| MACO1      | 0.010123 |
| ARMCX5     | 0.010112 |
| FZD4       | 0.010102 |
| POLD3      | 0.010064 |
| POLR2D     | 0.010052 |
| ZNF367     | 0.010043 |
| SKA2       | 0.010005 |
| NCK1       | 0.009998 |
| UBE2E2     | 0.009992 |
| SLF1       | 0.009965 |
| TYW3       | 0.009945 |
| SLC35F3    | 0.009844 |
| ILDR1      | 0.009835 |
| IL4R       | 0.009825 |
| MPG        | 0.009808 |
| EDF1       | 0.009777 |
| HBS1L      | 0.009757 |
| RHEB       | 0.009748 |
| CINP       | 0.009747 |
| UBALD1     | 0.009739 |
| PBK        | 0.009729 |
| OGDHL      | 0.009686 |
| TECR       | 0.009673 |
| DCTN4      | 0.009669 |
| TADA2B     | 0.00966  |
| DSTYK      | 0.009658 |
| SLC35A3    | 0.009651 |
| LARP4      | 0.009631 |
| C8orf58    | 0.00963  |
| LAS1L      | 0.009589 |
| ATAD2      | 0.009563 |
| SLC23A2    | 0.009546 |
| EVA1C      | 0.009537 |
| RPL18      | 0.009528 |
| COG3       | 0.009522 |
| SBNO1      | 0.009504 |
| MCMBP      | 0.009489 |
| SMARCD2    | 0.009472 |
| DBT        | 0.009471 |
| HCFC1      | 0.009466 |
| PSMD14     | 0.00945  |
| USP54      | 0.009445 |
| AC104794.3 | 0.00941  |
| MTCO1P12   | 0.009402 |
| POLD1      | 0.0094   |
| UBE2T      | 0.009398 |
| ALPK3      | 0.009362 |
| STX5       | 0.009357 |
| PIK3R4     | 0.009352 |

|            |          |
|------------|----------|
| ALKBH7     | 0.009303 |
| PPFIA3     | 0.009291 |
| AC009779.2 | 0.00926  |
| SNRPA      | 0.009188 |
| RNF123     | 0.009122 |
| CD47       | 0.009107 |
| PRRG4      | 0.009098 |
| UCN3       | 0.00909  |
| TRMT12     | 0.009066 |
| NUP214     | 0.009061 |
| FAM53C     | 0.009053 |
| TSC2       | 0.009044 |
| MOCS2      | 0.009042 |
| LSS        | 0.00902  |
| EPAS1      | 0.009    |
| ATP6V0B    | 0.008972 |
| AC020978.4 | 0.008939 |
| ZNF837     | 0.008928 |
| WBP4       | 0.008917 |
| DDX18      | 0.008887 |
| SKIL       | 0.008873 |
| SDHD       | 0.008855 |
| C9orf16    | 0.008749 |
| ROR2       | 0.008744 |
| SIK2       | 0.008743 |
| THAP9-AS1  | 0.00869  |
| NIT2       | 0.008643 |
| ISOC2      | 0.008622 |
| TMEM208    | 0.008621 |
| BRD9       | 0.008606 |
| FBXW11     | 0.008573 |
| C8orf82    | 0.008545 |
| GTF3C3     | 0.00854  |
| EIF2A      | 0.008513 |
| HCG18      | 0.008503 |
| UTP15      | 0.008437 |
| CAMSAP1    | 0.008428 |
| MAML2      | 0.008422 |
| XPNPEP1    | 0.008414 |
| PDCD10     | 0.008411 |
| RNFT2      | 0.008388 |
| CD44       | 0.00827  |
| ISCA1      | 0.00827  |
| TMED9      | 0.008262 |
| EMC10      | 0.008261 |
| AL160006.1 | 0.008252 |
| RAB4A      | 0.008243 |
| AC010615.2 | 0.008228 |
| C1QL2      | 0.008211 |

|            |          |
|------------|----------|
| ZNF395     | 0.008195 |
| HDHD5      | 0.008135 |
| RNU6-30P   | 0.008128 |
| ILRUN      | 0.008118 |
| AC010969.2 | 0.008086 |
| SREK1IP1   | 0.008078 |
| DHODH      | 0.008073 |
| CRPPA      | 0.008064 |
| PPP1R10    | 0.008041 |
| LRRC37A3   | 0.008038 |
| MCRIP1     | 0.008034 |
| ATP5MG     | 0.007994 |
| HMGXB3     | 0.007994 |
| HP         | 0.007983 |
| EID1       | 0.007969 |
| SNAPIN     | 0.007932 |
| ZNF398     | 0.007884 |
| SMC1A      | 0.007865 |
| TK2        | 0.007848 |
| CNPY4      | 0.007813 |
| DHX9       | 0.007794 |
| NVL        | 0.007779 |
| ATF6       | 0.007777 |
| ESYT1      | 0.007768 |
| ZC3H3      | 0.007754 |
| GTF2H5     | 0.007729 |
| ACOT8      | 0.007701 |
| RBBP4      | 0.007694 |
| GSPT1      | 0.007692 |
| CDCA2      | 0.00765  |
| ACOX3      | 0.007643 |
| NKD2       | 0.007576 |
| UPF3B      | 0.007518 |
| DAZAP2     | 0.007517 |
| TMEM219    | 0.007475 |
| ITGB1BP1   | 0.007466 |
| BRD3       | 0.007357 |
| CCNY       | 0.007311 |
| ZNF12      | 0.007302 |
| BTG3       | 0.007297 |
| PEX13      | 0.007277 |
| BEAN1      | 0.007271 |
| RRBP1      | 0.007265 |
| SHISA5     | 0.007261 |
| RBBP5      | 0.007252 |
| SCAT8      | 0.007238 |
| ABCB7      | 0.007233 |
| ZNF827     | 0.007226 |
| MTFP1      | 0.007221 |

|            |          |
|------------|----------|
| WFDC10B    | 0.007162 |
| PARK7      | 0.007157 |
| RPS6       | 0.007126 |
| TMEM97     | 0.007085 |
| AC018645.3 | 0.007039 |
| TBC1D9B    | 0.00703  |
| NUP62      | 0.007005 |
| CCL28      | 0.007004 |
| AGO1       | 0.00697  |
| BRCC3      | 0.00688  |
| POLR2C     | 0.006839 |
| DNAJC15    | 0.006805 |
| UBXN6      | 0.006798 |
| C15orf61   | 0.006785 |
| CSTF2T     | 0.006785 |
| SLC25A22   | 0.006766 |
| WAC-AS1    | 0.006728 |
| DDX31      | 0.006713 |
| PCDHB2     | 0.006711 |
| ERN2       | 0.006709 |
| GPATCH3    | 0.006588 |
| STXBP2     | 0.006555 |
| LINC01278  | 0.006522 |
| LTBP2      | 0.006493 |
| CDC42SE1   | 0.006475 |
| SLC41A2    | 0.006442 |
| HDAC3      | 0.006397 |
| ARHGAP19   | 0.006352 |
| MRPL20-DT  | 0.006351 |
| PTPRM      | 0.006333 |
| CAND1      | 0.006329 |
| TYW1       | 0.006294 |
| TMOD1      | 0.006261 |
| ARMCX6     | 0.006259 |
| AIFM3      | 0.006233 |
| ARL1       | 0.006176 |
| CREB3L4    | 0.00615  |
| DGCR6      | 0.006133 |
| FUNDC1     | 0.006124 |
| SDAD1      | 0.006123 |
| NUDT22     | 0.006043 |
| DONSON     | 0.006036 |
| TYSND1     | 0.006025 |
| LRATD1     | 0.006019 |
| B3GNT10    | 0.006005 |
| EIF3J-DT   | 0.005951 |
| SP3        | 0.005942 |
| CD99L2     | 0.005938 |
| ERCC6      | 0.005935 |

|            |          |
|------------|----------|
| C1RL       | 0.005913 |
| UBXN1      | 0.005899 |
| CCDC112    | 0.005897 |
| DDX27      | 0.005883 |
| HMGB1      | 0.005869 |
| OBSCN      | 0.005868 |
| ZNF316     | 0.005863 |
| RPL39P38   | 0.005837 |
| DEDD       | 0.005774 |
| TMEM50A    | 0.005737 |
| DLC1       | 0.005718 |
| NDUFV3     | 0.005711 |
| WARS2-AS1  | 0.005706 |
| IMPACT     | 0.005596 |
| HARS1      | 0.005555 |
| AC092651.1 | 0.005552 |
| SHOC2      | 0.005545 |
| AC073896.2 | 0.005524 |
| PRDX3      | 0.005493 |
| QRICH1     | 0.00549  |
| GATC       | 0.005482 |
| RAB14      | 0.005471 |
| GLYR1      | 0.005449 |
| CCNK       | 0.005428 |
| CA8        | 0.005423 |
| POLR3G     | 0.005398 |
| FZR1       | 0.005392 |
| FKTN       | 0.005383 |
| MRPL30     | 0.005371 |
| ANP32E     | 0.005355 |
| RALY       | 0.00534  |
| CUL1       | 0.005326 |
| FTL        | 0.005311 |
| NADK       | 0.005301 |
| IDH3G      | 0.005272 |
| CYP2S1     | 0.005251 |
| TPT1P4     | 0.00525  |
| BIRC2      | 0.005246 |
| GEM        | 0.005241 |
| INTS12     | 0.00524  |
| H3P14      | 0.00524  |
| FDXR       | 0.005201 |
| CNPPD1     | 0.005161 |
| NAP1L1P1   | 0.005158 |
| PSMD7      | 0.005126 |
| OSGEPL1    | 0.005119 |
| TRPM4      | 0.005096 |
| ZKSCAN4    | 0.005059 |
| TMEM42     | 0.005059 |

|            |          |
|------------|----------|
| INTS7      | 0.005052 |
| RNF44      | 0.005036 |
| MRPL18     | 0.005032 |
| FDFT1      | 0.005012 |
| PIGP       | 0.004999 |
| CFDP1      | 0.004997 |
| SF3B3      | 0.004974 |
| TRAPPC6A   | 0.004973 |
| UQCR10     | 0.004963 |
| SLC27A3    | 0.004948 |
| CYP2J2     | 0.004926 |
| RPTOR      | 0.004911 |
| RNASEL     | 0.004874 |
| PPP1CA     | 0.004866 |
| SFR1       | 0.004848 |
| RBM27      | 0.004819 |
| DDX42      | 0.004803 |
| KTN1-AS1   | 0.004791 |
| AUTS2      | 0.004786 |
| DCAKD      | 0.004782 |
| IAH1       | 0.004778 |
| EP400      | 0.004765 |
| EIF2B5     | 0.004765 |
| ETFBKMT    | 0.004758 |
| SNX4       | 0.004686 |
| BGLAP      | 0.004659 |
| RMI1       | 0.004656 |
| CIAPIN1    | 0.004611 |
| NDUFB9     | 0.004586 |
| CLN3       | 0.004572 |
| ZNF232     | 0.004543 |
| LMBR1L     | 0.004536 |
| PDHA1      | 0.004527 |
| CSNK1G1    | 0.004459 |
| AC009812.4 | 0.004448 |
| CLP1       | 0.004437 |
| NDUFB3     | 0.004435 |
| MEOX1      | 0.00443  |
| AC073508.3 | 0.004422 |
| EEF1AKMT1  | 0.004374 |
| POMGNT2    | 0.004348 |
| KIAA0895   | 0.004309 |
| ZNF496     | 0.004259 |
| SERTAD3    | 0.004226 |
| PTCD2      | 0.004187 |
| ATP11B     | 0.004142 |
| KRT8P12    | 0.004131 |
| MAP3K7     | 0.004125 |
| TSSC4      | 0.00412  |



|              |          |
|--------------|----------|
| EIF4G2       | 0.004109 |
| HPN          | 0.004109 |
| KIAA0753     | 0.004103 |
| ASPSCR1      | 0.004086 |
| SMC1B        | 0.004051 |
| ADCK2        | 0.004044 |
| Z99129.4     | 0.004038 |
| SLC25A17     | 0.004034 |
| PRNP         | 0.004031 |
| AC005076.1   | 0.004009 |
| PRR3         | 0.004006 |
| ATP5F1E      | 0.004    |
| HNRNPH3      | 0.003978 |
| DCP1A        | 0.003948 |
| SPTBN1       | 0.003945 |
| GPX1         | 0.003942 |
| RECQL5       | 0.003935 |
| DHX8         | 0.003895 |
| C5orf15      | 0.003883 |
| JMJD4        | 0.003857 |
| PHYH         | 0.003796 |
| WFDC3        | 0.003755 |
| PDE8A        | 0.003749 |
| C22orf23     | 0.003733 |
| CYCS         | 0.003733 |
| OTUB1        | 0.003728 |
| DPP9         | 0.003708 |
| STK31        | 0.003706 |
| ZFAND2B      | 0.003634 |
| ZNF148       | 0.003634 |
| OCEL1        | 0.003607 |
| APTR         | 0.003582 |
| CD34         | 0.003581 |
| AC023043.3   | 0.003563 |
| CNOT3        | 0.003558 |
| MTND5P11     | 0.003553 |
| THAP3        | 0.003546 |
| OSER1        | 0.003538 |
| MAGOHB       | 0.003518 |
| R3HDM1       | 0.003506 |
| CTC-338M12.4 | 0.003498 |
| SRSF9        | 0.003491 |
| MOB3C        | 0.003467 |
| STX10        | 0.003465 |
| JADE1        | 0.003441 |
| FAU          | 0.0034   |
| SMIM5        | 0.003328 |
| COX8A        | 0.003322 |
| SETD9        | 0.003303 |

|            |          |
|------------|----------|
| PITPNB     | 0.003298 |
| DBR1       | 0.003289 |
| AC091492.1 | 0.003288 |
| SDC1       | 0.003279 |
| DRAP1      | 0.003276 |
| GTPBP4     | 0.003273 |
| MLEC       | 0.003262 |
| TMEM39A    | 0.003262 |
| FILIP1L    | 0.003256 |
| FAM107B    | 0.003233 |
| CTNNBL1    | 0.003228 |
| ZSWIM8     | 0.003198 |
| MTRNR2L12  | 0.003183 |
| PCNP       | 0.003176 |
| TMEM51     | 0.003166 |
| LINC01426  | 0.003139 |
| PIAS3      | 0.003133 |
| SNX17      | 0.003126 |
| GLCE       | 0.003097 |
| CCDC12     | 0.003072 |
| TMEM147    | 0.003012 |
| KBTBD6     | 0.003006 |
| TCF20      | 0.002997 |
| CFL2       | 0.002985 |
| AC011511.5 | 0.002982 |
| CTU2       | 0.00298  |
| BRMS1      | 0.002971 |
| ZMYM3      | 0.002934 |
| ZNF786     | 0.002906 |
| AURKA      | 0.002897 |
| PMS2CL     | 0.002866 |
| RTL8B      | 0.002859 |
| EDEM3      | 0.002837 |
| ABHD8      | 0.002833 |
| EXOSC2     | 0.002823 |
| HLCS       | 0.002818 |
| COMMD10    | 0.002807 |
| METTL6     | 0.002789 |
| WASHC5     | 0.002757 |
| SERHL2     | 0.002713 |
| LETMD1     | 0.002708 |
| CEP57      | 0.002697 |
| AC007938.3 | 0.002691 |
| PRMT9      | 0.00269  |
| GABBR2     | 0.002663 |
| MRPL27     | 0.002638 |
| ZNF33B     | 0.002617 |
| EXT2       | 0.002611 |
| TSNAX      | 0.002598 |

|            |          |
|------------|----------|
| AFG3L2     | 0.002541 |
| ORC3       | 0.002535 |
| PRR16      | 0.002518 |
| ADAT1      | 0.002476 |
| PTPRA      | 0.002471 |
| RHBDD3     | 0.002437 |
| CNOT10     | 0.002436 |
| SLC9A8     | 0.002434 |
| ANKEF1     | 0.00242  |
| CYTH3      | 0.002376 |
| CAMKK2     | 0.002367 |
| PALB2      | 0.002364 |
| ETV1       | 0.002359 |
| ACAD9      | 0.002338 |
| PTPRE      | 0.00231  |
| TAOK3      | 0.002306 |
| GLA        | 0.0023   |
| SMN1       | 0.002292 |
| LINC00680  | 0.002291 |
| C10orf88   | 0.00229  |
| TMEM30B    | 0.002275 |
| ISY1       | 0.002254 |
| METTL21A   | 0.002252 |
| GABARAP    | 0.002241 |
| SYT7       | 0.002217 |
| APOL1      | 0.002163 |
| ZCWPW1     | 0.002147 |
| ENO2       | 0.002133 |
| CCDC92     | 0.002125 |
| TOPORS     | 0.002125 |
| SLC24A1    | 0.002125 |
| TAF5       | 0.002122 |
| TGFB1      | 0.00209  |
| VPS35      | 0.002082 |
| NAXE       | 0.002031 |
| PRKDC      | 0.002027 |
| HNRNPC     | 0.002015 |
| AL050341.2 | 0.002012 |
| PSMD1      | 0.001995 |
| ATP6V1F    | 0.001984 |
| DMRTA1     | 0.001974 |
| CRYAB      | 0.001967 |
| ATP5MPL    | 0.001914 |
| HMG2       | 0.001879 |
| AAMDC      | 0.001868 |
| VPS4A      | 0.001824 |
| RPL23AP2   | 0.001811 |
| ATP5PB     | 0.00181  |
| DCTPP1     | 0.001781 |

|            |          |
|------------|----------|
| LGALSL     | 0.001774 |
| RABEPK     | 0.00177  |
| STAP2      | 0.001749 |
| RNF111     | 0.001737 |
| PDHB       | 0.001702 |
| NTHL1      | 0.001689 |
| CCDC97     | 0.001655 |
| DCTN2      | 0.001654 |
| TSR2       | 0.001648 |
| MRPL38     | 0.001647 |
| FAM120AOS  | 0.001629 |
| CHSY1      | 0.001628 |
| AC055811.4 | 0.001628 |
| AC011472.4 | 0.001599 |
| CKAP5      | 0.001573 |
| POLH       | 0.001571 |
| MARCHF7    | 0.001545 |
| PCAT7      | 0.001526 |
| VWA2       | 0.001524 |
| MED22      | 0.001517 |
| GMEB1      | 0.001507 |
| SMCO4      | 0.001488 |
| ZNF142     | 0.001478 |
| SURF6      | 0.001409 |
| DHDH       | 0.001397 |
| SFXN1      | 0.001393 |
| PCGF3      | 0.001362 |
| KLHL2      | 0.001362 |
| RPS9       | 0.00135  |
| PDZD11     | 0.001349 |
| RUNX1      | 0.001345 |
| LAMA4      | 0.001268 |
| ANXA4      | 0.001231 |
| COA6       | 0.001217 |
| TPD52      | 0.001189 |
| ZNF341     | 0.001152 |
| TMEM223    | 0.001131 |
| GOLGA5     | 0.001113 |
| TIE1       | 0.001094 |
| ZNF605     | 0.001082 |
| DOCK1      | 0.001078 |
| HTATSF1    | 0.001053 |
| FBXL17     | 0.001023 |
| THOP1      | 0.001005 |
| NDUFB6     | 0.000987 |
| ZNF414     | 0.000895 |
| NUDT16     | 0.000813 |
| FRYL       | 0.0008   |
| SRPK2      | 0.000793 |

|            |          |
|------------|----------|
| THEM6      | 0.000778 |
| USO1       | 0.000765 |
| ACOX2      | 0.000724 |
| SUPT6H     | 0.000671 |
| AC005670.3 | 0.000668 |
| RAB11B     | 0.000662 |
| SRRT       | 0.000625 |
| AXIN1      | 0.000586 |
| FAM160B1   | 0.000584 |
| MED29      | 0.000576 |
| C12orf29   | 0.000491 |
| ZFP41      | 0.000479 |
| DPP4-DT    | 0.000476 |
| ADGRG6     | 0.000471 |
| PCDHB11    | 0.000466 |
| NUP188     | 0.00046  |
| LDB1       | 0.000444 |
| ARHGAP42   | 0.000381 |
| LY6E       | 0.00034  |
| ZNF358     | 0.00033  |
| AL137784.1 | 0.000304 |
| RNLS       | 0.000281 |
| UBE2R2     | 0.000246 |
| TOP1       | 0.000198 |
| PPP1R7     | 0.000196 |
| DPP3       | 0.000196 |
| ZC3H11A    | 0.000172 |
| SLC25A38   | 0.000171 |
| NONO       | 0.000166 |
| NAGPA      | 8.44E-05 |
| CALCOCO2   | 7.50E-05 |
| UFD1       | 7.38E-05 |
| RAB3B      | 5.92E-05 |
| MYLK       | 4.54E-05 |
| AC004918.1 | 1.41E-05 |
| ARFGAP3    | #####    |
| YIPF4      | #####    |
| BAZ2A      | -0.0001  |
| DSC3       | -0.00011 |
| SETD6      | -0.00013 |
| ZBTB41     | -0.00013 |
| GNAQ       | -0.00014 |
| AZI2       | -0.00014 |
| TBC1D23    | -0.00016 |
| STK39      | -0.00018 |
| USP10      | -0.00019 |
| AC144530.1 | -0.00021 |
| TOM1L2     | -0.00025 |
| LINC02585  | -0.00029 |

|            |          |
|------------|----------|
| RHOT1      | -0.00029 |
| MXD4       | -0.0003  |
| BCS1L      | -0.00032 |
| HERC3      | -0.00032 |
| EMCN       | -0.00033 |
| AP002336.2 | -0.00037 |
| CLNS1A     | -0.00039 |
| HNRNPH2    | -0.00039 |
| TMEM68     | -0.0004  |
| PRMT3      | -0.00041 |
| ATP6V1E1   | -0.00044 |
| AC106900.1 | -0.00048 |
| OAS3       | -0.00055 |
| TXNRD3     | -0.00058 |
| INAFM2     | -0.00059 |
| RIOX2      | -0.00059 |
| GAN        | -0.00064 |
| CREBBP     | -0.00065 |
| C19orf54   | -0.00072 |
| SFT2D1     | -0.00075 |
| GLT8D1     | -0.00082 |
| FAM234B    | -0.00083 |
| MOCS3      | -0.00083 |
| RPL9P29    | -0.00087 |
| PPP1R8     | -0.00093 |
| KCNQ1      | -0.00097 |
| TUBGCP2    | -0.00098 |
| COG4       | -0.00106 |
| SNAP23     | -0.00107 |
| FTLP14     | -0.00112 |
| HHATL      | -0.00112 |
| LLPH       | -0.00118 |
| NSRP1      | -0.00119 |
| PGAP4      | -0.0012  |
| TPST1      | -0.00123 |
| PRTFDC1    | -0.00126 |
| N6AMT1     | -0.0013  |
| NDUFAF1    | -0.0013  |
| SMCR8      | -0.00131 |
| GTF2IP20   | -0.00135 |
| UBR1       | -0.00137 |
| GPR108     | -0.00138 |
| MPV17L2    | -0.00138 |
| RPL34      | -0.00141 |
| PCDHGC3    | -0.00141 |
| PDCD7      | -0.00146 |
| LINC00239  | -0.00151 |
| EPDR1      | -0.00152 |
| PEX1       | -0.00153 |

|            |          |
|------------|----------|
| PRKAR1A    | -0.00155 |
| PRKCSH     | -0.00158 |
| PSMA2      | -0.00158 |
| RABGAP1    | -0.0016  |
| DGCR8      | -0.0016  |
| GLRB       | -0.00162 |
| NAE1       | -0.00165 |
| BRD8       | -0.00169 |
| RPS28P4    | -0.00174 |
| PLA2G4F    | -0.00176 |
| CNOT4      | -0.00178 |
| AC122688.3 | -0.0018  |
| VAMP7      | -0.00181 |
| ATP6V0E1   | -0.00182 |
| AC074117.1 | -0.00185 |
| RAD23A     | -0.00186 |
| ETFDH      | -0.00186 |
| PPID       | -0.00188 |
| MMS22L     | -0.00194 |
| NDFIP1     | -0.00197 |
| SH3D19     | -0.00198 |
| SNAPC5     | -0.00201 |
| DOHH       | -0.00203 |
| DENND2B    | -0.00203 |
| DYNC1H1    | -0.00205 |
| TRNAU1AP   | -0.00206 |
| ZNF134     | -0.00208 |
| TUBG2      | -0.00209 |
| RBM12      | -0.00211 |
| PLD2       | -0.00212 |
| SFMBT1     | -0.00214 |
| HDAC1      | -0.00215 |
| MRGPRF     | -0.00216 |
| MRPS33     | -0.00216 |
| TPGS2      | -0.00224 |
| KIAA0319L  | -0.00225 |
| ZNF48      | -0.00226 |
| CCNI       | -0.00226 |
| FOXA3      | -0.00226 |
| ANXA7      | -0.00227 |
| ST3GAL1    | -0.00227 |
| FRA10AC1   | -0.0023  |
| PSMD3      | -0.00236 |
| FADS1      | -0.00239 |
| AL928654.1 | -0.0024  |
| GTF2H4     | -0.00244 |
| CCNG2      | -0.00245 |
| PPA1       | -0.00246 |
| AC108134.2 | -0.00251 |

|            |          |
|------------|----------|
| UBR4       | -0.00251 |
| AKR1E2     | -0.00253 |
| GPAM       | -0.00254 |
| KAT6B      | -0.00255 |
| SARS2      | -0.00255 |
| CNPY3      | -0.00259 |
| TRIB2      | -0.00259 |
| MEGF6      | -0.0026  |
| NAF1       | -0.00262 |
| CFAP97     | -0.00263 |
| SALL2      | -0.00266 |
| TSPEAR-AS1 | -0.00266 |
| APPBP2     | -0.00267 |
| ACTR6      | -0.00269 |
| FEM1C      | -0.00269 |
| PXMP4      | -0.00272 |
| AVIL       | -0.00272 |
| CERS5      | -0.00274 |
| RRAGC      | -0.00274 |
| FYTTD1     | -0.00275 |
| DEDD2      | -0.00275 |
| MFAP3      | -0.00276 |
| MINDY1     | -0.00281 |
| LCMT1      | -0.00286 |
| HK2        | -0.00286 |
| C6orf62    | -0.00288 |
| CCZ1       | -0.00292 |
| HTRA3      | -0.00292 |
| LPAL2      | -0.00292 |
| PPIH       | -0.00294 |
| WIZ        | -0.00294 |
| KIF22      | -0.00296 |
| NOSIP      | -0.00299 |
| SMAD2      | -0.00299 |
| RMND5B     | -0.00301 |
| HM13       | -0.00304 |
| DR1        | -0.00305 |
| PLBD1-AS1  | -0.0032  |
| TRAK1      | -0.00322 |
| VPS53      | -0.00322 |
| NDUFC2     | -0.00323 |
| CCNT1      | -0.00323 |
| TTL        | -0.00326 |
| DDX20      | -0.00328 |
| NEIL2      | -0.00328 |
| GPR89A     | -0.0033  |
| RBCK1      | -0.00331 |
| MGST3      | -0.00332 |
| SH3GLB1    | -0.00332 |



|            |          |
|------------|----------|
| ADTRP      | -0.00334 |
| DYSF       | -0.00334 |
| EIPR1      | -0.00336 |
| FDX2       | -0.00339 |
| CDK11B     | -0.00341 |
| MISP3      | -0.00342 |
| IL18       | -0.00348 |
| OBI1       | -0.00348 |
| BDKRB1     | -0.00351 |
| STX12      | -0.00352 |
| MRPL39     | -0.00353 |
| ATG5       | -0.00354 |
| LINC01637  | -0.00356 |
| COQ9       | -0.00357 |
| UTP14C     | -0.00359 |
| OR2A1-AS1  | -0.00362 |
| SCAF4      | -0.00363 |
| MT-ND4     | -0.0037  |
| C2CD2      | -0.00373 |
| UBE2D2     | -0.00374 |
| TMEM203    | -0.00377 |
| CSNK1G3    | -0.00379 |
| LGALS3BP   | -0.00381 |
| CMIP       | -0.00383 |
| PDHX       | -0.00385 |
| AC008280.2 | -0.00385 |
| WLS        | -0.00386 |
| NCAPD3     | -0.00386 |
| VTI1B      | -0.0039  |
| VSTM4      | -0.0039  |
| COPS7B     | -0.00392 |
| SLC16A8    | -0.00397 |
| AL118506.1 | -0.00397 |
| CDKN3      | -0.00398 |
| NAA25      | -0.004   |
| C19orf53   | -0.004   |
| RFWD3      | -0.00404 |
| FRGCA      | -0.00409 |
| EMD        | -0.00413 |
| LRRC75B    | -0.00416 |
| XAB2       | -0.00418 |
| PMS2       | -0.00422 |
| PPP1R37    | -0.00424 |
| THAP2      | -0.00425 |
| AC008537.2 | -0.00425 |
| ZNF28      | -0.00425 |
| CARM1      | -0.00426 |
| STX8       | -0.00426 |
| SMARCA5    | -0.00427 |

|            |          |
|------------|----------|
| AL596244.1 | -0.00428 |
| IP6K2      | -0.0043  |
| IQANK1     | -0.00432 |
| GPN2       | -0.00433 |
| C1orf174   | -0.00439 |
| TRMT1L     | -0.00442 |
| SLC25A11   | -0.00442 |
| U2SURP     | -0.00443 |
| RBM18      | -0.00445 |
| METTL18    | -0.0045  |
| ERC1       | -0.00452 |
| ZBED8      | -0.00452 |
| SSNA1      | -0.00454 |
| DNAL4      | -0.00455 |
| LZIC       | -0.00455 |
| MMP2       | -0.00455 |
| ATP5PF     | -0.00457 |
| RAB9A      | -0.00459 |
| DPM3       | -0.00464 |
| RPS6KC1    | -0.00465 |
| C1orf210   | -0.00465 |
| LINC02560  | -0.00468 |
| PPIG       | -0.00469 |
| PRRC2C     | -0.00469 |
| SRP9       | -0.0047  |
| GADD45GIP1 | -0.00473 |
| GID4       | -0.00475 |
| MCL1       | -0.00478 |
| KIAA1143   | -0.00478 |
| SUMO1      | -0.00481 |
| PARD3B     | -0.00482 |
| PINK1-AS   | -0.00483 |
| RNF126     | -0.00484 |
| ENTR1      | -0.00486 |
| TMEM216    | -0.00488 |
| ZNF704     | -0.00488 |
| ALG2       | -0.00489 |
| ATP5PO     | -0.00494 |
| TSPAN18    | -0.00494 |
| FCF1       | -0.00499 |
| CSRP2      | -0.00504 |
| CDKN2B     | -0.00505 |
| GDE1       | -0.00509 |
| AEN        | -0.00512 |
| AC022018.1 | -0.00519 |
| DCPS       | -0.0052  |
| TRIM41     | -0.0052  |
| DPY19L4    | -0.0052  |
| RBM10      | -0.00521 |

|            |          |
|------------|----------|
| TTLL1      | -0.00528 |
| PDPR       | -0.00531 |
| PSMA7      | -0.00532 |
| SCARF1     | -0.00532 |
| DIS3       | -0.00533 |
| APBA1      | -0.00534 |
| AC092171.3 | -0.00534 |
| CISD1      | -0.00536 |
| AC073569.2 | -0.0054  |
| TTPAL      | -0.00542 |
| BNIP3L     | -0.00543 |
| CDC42      | -0.00544 |
| NUP133     | -0.00547 |
| UNC93B1    | -0.00548 |
| IGF2R      | -0.00548 |
| REPS2      | -0.00549 |
| C12orf66   | -0.00549 |
| AGK        | -0.0055  |
| DSEL       | -0.00551 |
| ADI1       | -0.00551 |
| RPL10P16   | -0.00553 |
| SLC35A5    | -0.00555 |
| PSMB1      | -0.00556 |
| PRANCR     | -0.0056  |
| COX7B2     | -0.0056  |
| CLEC5A     | -0.00561 |
| TRMT2A     | -0.00562 |
| SUV39H2    | -0.00564 |
| SUZ12      | -0.00565 |
| RIPK1      | -0.00572 |
| NTAQ1      | -0.00577 |
| SH3PXD2B   | -0.00579 |
| SFPQ       | -0.0058  |
| DPCD       | -0.00582 |
| CTBS       | -0.00584 |
| PPIL4      | -0.00584 |
| ZNF470     | -0.00585 |
| PYCR3      | -0.00586 |
| DBNL       | -0.00586 |
| ILF3       | -0.0059  |
| MAVS       | -0.00591 |
| KLHL18     | -0.00592 |
| AL441992.1 | -0.00592 |
| VPS33B     | -0.00594 |
| GTF2H1     | -0.00595 |
| B3GNTL1    | -0.00597 |
| SLX4       | -0.00597 |
| RUNDC1     | -0.00599 |
| PLCH1      | -0.006   |

|            |          |
|------------|----------|
| PDZD8      | -0.00601 |
| SPEG       | -0.00602 |
| NEDD1      | -0.00602 |
| AL627309.6 | -0.00606 |
| TMEM218    | -0.00607 |
| KIT        | -0.00611 |
| PLEKHA5    | -0.00612 |
| MRPS36     | -0.00614 |
| NCAPH2     | -0.00614 |
| ST20       | -0.00615 |
| CHMP4B     | -0.00616 |
| NDUFB11    | -0.00627 |
| PTMA       | -0.00629 |
| UBOX5      | -0.00629 |
| C19orf47   | -0.00634 |
| TMEM41B    | -0.00634 |
| REEP4      | -0.00635 |
| AC022306.2 | -0.00642 |
| ABR        | -0.00643 |
| GSS        | -0.00645 |
| ACTR1B     | -0.00646 |
| PARN       | -0.00653 |
| ROGDI      | -0.00656 |
| ENPP5      | -0.00664 |
| LIMS1      | -0.00666 |
| MRPS5      | -0.00666 |
| TBC1D25    | -0.00668 |
| FAN1       | -0.00668 |
| SRCAP      | -0.00674 |
| DNAJB11    | -0.00674 |
| FBXO32     | -0.00677 |
| ALKBH8     | -0.00678 |
| RUFY1      | -0.00681 |
| SFXN5      | -0.00691 |
| TAF4       | -0.00693 |
| ORAI3      | -0.00694 |
| JADE3      | -0.00697 |
| SLC46A1    | -0.00697 |
| ZNF318     | -0.00698 |
| NUP35      | -0.00698 |
| DCTN6      | -0.00699 |
| CENPM      | -0.00701 |
| MRPL44     | -0.00701 |
| AC092295.2 | -0.00706 |
| SCRN2      | -0.00714 |
| FEZ1       | -0.00717 |
| COMMD2     | -0.00718 |
| IER3-AS1   | -0.00721 |
| EFL1       | -0.00722 |

|            |          |
|------------|----------|
| DENND5B    | -0.00722 |
| CPLX1      | -0.00723 |
| MTFR1L     | -0.00725 |
| EXOSC4     | -0.00728 |
| TSC22D1    | -0.00728 |
| ARHGAP35   | -0.0073  |
| SLC25A4    | -0.0073  |
| SLX4IP     | -0.00734 |
| NCOA5      | -0.00734 |
| FXN        | -0.00735 |
| SPPL2A     | -0.00737 |
| ARMC5      | -0.0074  |
| PMM2       | -0.00743 |
| SAP18      | -0.00744 |
| MYDGF      | -0.00746 |
| ALDH9A1    | -0.00748 |
| SFXN2      | -0.00749 |
| SLC15A4    | -0.00749 |
| MAP4K3     | -0.00753 |
| AC010326.3 | -0.00754 |
| RPL39P40   | -0.00755 |
| PSMC4      | -0.0076  |
| FBLN5      | -0.00761 |
| ZBED1      | -0.00763 |
| DDX55      | -0.00764 |
| TIMM8B     | -0.00767 |
| ZNF793-AS1 | -0.00772 |
| UBALD2     | -0.00775 |
| SNRNP48    | -0.00776 |
| TMEM220    | -0.00777 |
| MIR200B    | -0.00777 |
| PYCR2      | -0.00778 |
| SCYL2      | -0.00779 |
| SPRYD4     | -0.0078  |
| SLC25A26   | -0.00784 |
| SLC1A5     | -0.00787 |
| ANAPC1     | -0.00789 |
| GRPEL2     | -0.0079  |
| PIGG       | -0.00793 |
| SF1        | -0.00795 |
| ATXN1L     | -0.00795 |
| CPT1C      | -0.00798 |
| PHF3       | -0.00798 |
| PANK4      | -0.008   |
| TUBD1      | -0.00805 |
| FAM214B    | -0.00806 |
| MAF1       | -0.00807 |
| IDH3B      | -0.0081  |
| TIMM29     | -0.0081  |

|            |          |
|------------|----------|
| AL157932.1 | -0.00811 |
| PLEKHM2    | -0.00812 |
| GBP3       | -0.00813 |
| UBXN7      | -0.00813 |
| TSPAN31    | -0.00814 |
| TOP1MT     | -0.00815 |
| RPL3P4     | -0.00817 |
| LRATD2     | -0.00817 |
| NUDT8      | -0.0082  |
| TNFRSF8    | -0.00821 |
| MBLAC2     | -0.00821 |
| PHRF1      | -0.00823 |
| RPS5       | -0.00824 |
| TIGD2      | -0.00826 |
| FAM199X    | -0.00828 |
| NAIF1      | -0.00829 |
| SMAD7      | -0.0083  |
| TOR1AIP1   | -0.00834 |
| ARPC2      | -0.00835 |
| TDRP       | -0.00837 |
| PPA2       | -0.00845 |
| ZNF436     | -0.00846 |
| AC009318.2 | -0.00849 |
| VEZT       | -0.00855 |
| KATNB1     | -0.00859 |
| HINT3      | -0.00863 |
| SMAD5      | -0.00867 |
| AARS1      | -0.00868 |
| POGZ       | -0.00868 |
| AFDN       | -0.00868 |
| FOXRED2    | -0.00869 |
| COL27A1    | -0.0087  |
| TSHZ3      | -0.00871 |
| ZRANB1     | -0.00876 |
| CLPX       | -0.00877 |
| DHX36      | -0.00879 |
| NTPCR      | -0.00882 |
| AIMP1      | -0.00885 |
| HPSE       | -0.00885 |
| KIAA1958   | -0.00888 |
| SEC23B     | -0.00891 |
| C4orf3     | -0.00893 |
| GET3       | -0.00895 |
| HNRNPM     | -0.00897 |
| VANGL2     | -0.00898 |
| GGA3       | -0.00903 |
| CFAP298    | -0.00905 |
| AC129507.2 | -0.00905 |
| RGP1       | -0.00905 |

|            |          |
|------------|----------|
| CCDC43     | -0.00906 |
| FUCA2      | -0.00907 |
| MCM8       | -0.00909 |
| STK26      | -0.00909 |
| SUPT7L     | -0.0091  |
| AUP1       | -0.0091  |
| MAP1LC3B2  | -0.0091  |
| NBPF15     | -0.0091  |
| LINC01655  | -0.00911 |
| PIGB       | -0.00911 |
| AHSA1      | -0.00913 |
| AC120498.4 | -0.00916 |
| RPS23      | -0.00918 |
| TIMM13     | -0.00919 |
| C20orf27   | -0.00919 |
| MIR429     | -0.0092  |
| P4HTM      | -0.00921 |
| MKLN1-AS   | -0.00921 |
| PAXIP1     | -0.00922 |
| LRG1       | -0.00923 |
| TRAF3IP2   | -0.00923 |
| CCNYL1     | -0.00928 |
| MSH2       | -0.00928 |
| GORASP1    | -0.00928 |
| ENTPD6     | -0.0093  |
| PDGFRL     | -0.00931 |
| EMP2       | -0.00933 |
| VPS26B     | -0.00934 |
| MRPS23     | -0.00935 |
| SEPHS1     | -0.00941 |
| UBAC2-AS1  | -0.00941 |
| ADAMTS16   | -0.00942 |
| HIP1R      | -0.00944 |
| PROSER1    | -0.00946 |
| SURF1      | -0.00951 |
| ALG14      | -0.00952 |
| COA3       | -0.00956 |
| ZC3H7B     | -0.00958 |
| DHX38      | -0.00959 |
| TUBGCP5    | -0.0096  |
| SDF2       | -0.00964 |
| SPSB3      | -0.00965 |
| CRIM1-DT   | -0.00968 |
| ULK3       | -0.00968 |
| HNRNPF     | -0.00969 |
| SGSM2      | -0.00969 |
| TMEM62     | -0.00972 |
| ZNF16      | -0.00974 |
| EIF3F      | -0.00978 |

|            |          |
|------------|----------|
| KCNAB1     | -0.00978 |
| BRPF1      | -0.0098  |
| TXN2       | -0.00982 |
| INTS5      | -0.00983 |
| CHIC2      | -0.0099  |
| TANGO2     | -0.0099  |
| DCAF7      | -0.0099  |
| FBR5       | -0.00991 |
| MDH1       | -0.00992 |
| TMEM9B     | -0.00994 |
| PCMT1      | -0.00995 |
| UBASH3B    | -0.00997 |
| MDK        | -0.00998 |
| NUP160     | -0.01002 |
| FAM174A    | -0.01006 |
| RNF149     | -0.0101  |
| AP001542.1 | -0.0101  |
| PRPF31     | -0.01011 |
| ZSCAN20    | -0.01013 |
| OXLD1      | -0.01014 |
| CAMK2D     | -0.01018 |
| USP32      | -0.01019 |
| WDR91      | -0.0102  |
| GTPBP8     | -0.0102  |
| MTOR       | -0.0102  |
| TCEAL4     | -0.01021 |
| RPLP0      | -0.01023 |
| NEFH       | -0.01025 |
| LONP2      | -0.01026 |
| LPGAT1     | -0.01026 |
| LMF2       | -0.01031 |
| CD2BP2     | -0.01035 |
| AC091982.3 | -0.01036 |
| LNPK       | -0.01036 |
| ARFIP2     | -0.01036 |
| IQCH-AS1   | -0.01037 |
| WAC        | -0.01038 |
| NANS       | -0.01044 |
| COMMD6     | -0.01046 |
| LONRF3     | -0.01047 |
| FASTKD2    | -0.01048 |
| EEF1B2     | -0.01054 |
| TP53I11    | -0.01054 |
| POLR3B     | -0.01054 |
| ELMOD2     | -0.01058 |
| RAB33B     | -0.0106  |
| UHMK1      | -0.0106  |
| ZNF576     | -0.01061 |
| GTF2IP13   | -0.01062 |



|            |          |
|------------|----------|
| RPL39      | -0.01063 |
| BDNF-AS    | -0.01065 |
| TBX4       | -0.01066 |
| SDE2       | -0.01075 |
| TSEN54     | -0.0108  |
| DYNC1LI2   | -0.01081 |
| AGPAT5     | -0.01083 |
| AC084824.4 | -0.01094 |
| AC073896.4 | -0.01095 |
| PRIMPOL    | -0.01095 |
| SERINC1    | -0.01097 |
| HNRNPL     | -0.01098 |
| CAPN13     | -0.01099 |
| NKRF       | -0.011   |
| ATG13      | -0.01101 |
| CACTIN     | -0.01103 |
| ARFGAP2    | -0.01106 |
| RPL3       | -0.01107 |
| AGR3       | -0.01108 |
| RPS15AP11  | -0.01111 |
| AC006213.4 | -0.01112 |
| AKR1A1     | -0.01115 |
| TTC3       | -0.01115 |
| NDE1       | -0.01116 |
| ACVR1B     | -0.01118 |
| MICOS13    | -0.0112  |
| SIAH2      | -0.0112  |
| SETD1B     | -0.01121 |
| BLOC1S1    | -0.01121 |
| CASTOR1    | -0.01122 |
| TRNP1      | -0.01122 |
| TRPV4      | -0.01123 |
| NOP56      | -0.01124 |
| LACTB2     | -0.01128 |
| AC104667.2 | -0.0113  |
| CYTL1      | -0.0113  |
| SYNPO      | -0.01131 |
| ZFP69      | -0.01131 |
| PTMS       | -0.01132 |
| AL031667.3 | -0.01132 |
| POLE       | -0.01133 |
| SMARCA4    | -0.01133 |
| NUP58      | -0.01138 |
| PCCA       | -0.01139 |
| HOXC9      | -0.0114  |
| GOLGA1     | -0.01141 |
| ZNF692     | -0.01141 |
| PPP2R5B    | -0.01142 |
| HERPUD2    | -0.01144 |

|             |          |
|-------------|----------|
| AC022400.1  | -0.01151 |
| GUSB        | -0.01151 |
| PET117      | -0.01153 |
| BFAR        | -0.01164 |
| MAP1A       | -0.01165 |
| SRR         | -0.01166 |
| HMG2P5      | -0.01166 |
| CDC42P6     | -0.01166 |
| MYD88       | -0.01168 |
| AMER1       | -0.01176 |
| AP001972.5  | -0.01176 |
| RASGEF1A    | -0.01179 |
| NUP98       | -0.01179 |
| HSD3B7      | -0.0118  |
| ATP6V1G1    | -0.01181 |
| BMPR2       | -0.01182 |
| C2orf68     | -0.01183 |
| NUDCD1      | -0.01184 |
| BABAM1      | -0.0119  |
| AC073063.1  | -0.01192 |
| PHF19       | -0.01194 |
| ENTPD5      | -0.01198 |
| CDK9        | -0.01198 |
| ZNF418      | -0.01199 |
| DCAF16      | -0.012   |
| AC007688.1  | -0.01202 |
| EEF1A1      | -0.01202 |
| AC005476.2  | -0.01202 |
| FAM219B     | -0.01202 |
| B4GALT1-AS1 | -0.01205 |
| IFT20       | -0.0121  |
| AC007342.9  | -0.0121  |
| PLXNA3      | -0.01211 |
| RBAK        | -0.01211 |
| WDR45       | -0.01212 |
| OSGIN2      | -0.01217 |
| RPL7P32     | -0.0122  |
| TUG1        | -0.01221 |
| COX14       | -0.01225 |
| POLR3K      | -0.01225 |
| SPCS1       | -0.01226 |
| ZBED5-AS1   | -0.0123  |
| PARP3       | -0.0123  |
| AC069307.1  | -0.01231 |
| SETD1A      | -0.01232 |
| EIF4E       | -0.01233 |
| ACTR2       | -0.01234 |
| THAP11      | -0.01236 |
| RMND1       | -0.01237 |

|               |          |
|---------------|----------|
| NDUFA8        | -0.01239 |
| FCHO1         | -0.01241 |
| HIGD2A        | -0.01242 |
| MCTS1         | -0.01245 |
| AC009948.2    | -0.01253 |
| TRAM1L1       | -0.01254 |
| TNFRSF10A-AS1 | -0.01257 |
| DNAJC7        | -0.01258 |
| PCGF6         | -0.01259 |
| ETHE1         | -0.01262 |
| SAMD10        | -0.01264 |
| CWF19L2       | -0.01264 |
| FAM114A2      | -0.01265 |
| CROT          | -0.01266 |
| POLR3D        | -0.01266 |
| LRCH4         | -0.01266 |
| AC096677.1    | -0.01268 |
| EPB41L4B      | -0.01271 |
| TSPYL1        | -0.01275 |
| H2AZ1         | -0.0128  |
| EAF1          | -0.01283 |
| OSTC          | -0.01285 |
| H3C6          | -0.01285 |
| RPS4X         | -0.01287 |
| NENF          | -0.01289 |
| HNRNPA1P16    | -0.01289 |
| TRIOBP        | -0.01289 |
| LMCD1         | -0.0129  |
| ZNF740        | -0.01295 |
| CLPTM1L       | -0.01298 |
| PWWP2A        | -0.01298 |
| INKA1         | -0.01302 |
| UBAP2         | -0.01302 |
| CLCN4         | -0.01308 |
| CWC15         | -0.01314 |
| ATP5MC3       | -0.01319 |
| AL121949.1    | -0.01321 |
| SNRPF         | -0.01326 |
| TOLLIP        | -0.01332 |
| LRP10         | -0.01332 |
| TBL1XR1       | -0.01338 |
| TECPR2        | -0.01343 |
| ACOT9         | -0.01347 |
| ARX           | -0.01347 |
| DEGS1         | -0.0135  |
| TEX2          | -0.0135  |
| PPIP5K1       | -0.01353 |
| DUSP3         | -0.01357 |
| DIPK1B        | -0.01362 |

|            |          |
|------------|----------|
| OTUD5      | -0.01363 |
| LUM        | -0.01365 |
| PGP        | -0.01366 |
| SMIM7      | -0.01367 |
| SKP1P1     | -0.01372 |
| WDR5B      | -0.01372 |
| AP1AR      | -0.01375 |
| TMEM179B   | -0.01375 |
| RIF1       | -0.0138  |
| GPR137     | -0.01381 |
| JOSD1      | -0.01382 |
| C4A        | -0.01385 |
| RBP7       | -0.01387 |
| WDR12      | -0.01394 |
| COX6A1     | -0.01394 |
| PIK3CA     | -0.01395 |
| RNASEH1    | -0.01396 |
| LRP6       | -0.01396 |
| FH         | -0.01399 |
| BICC1      | -0.01399 |
| SP2        | -0.014   |
| POLG       | -0.014   |
| BANP       | -0.01403 |
| TMED2      | -0.01403 |
| DCP1B      | -0.01404 |
| RECQL4     | -0.01404 |
| ARMCX3     | -0.01406 |
| NAA10      | -0.01407 |
| BCL3       | -0.01408 |
| MTA2       | -0.01411 |
| POLR1E     | -0.01411 |
| RPL31      | -0.01414 |
| ACTR5      | -0.01414 |
| ITGAV      | -0.01415 |
| EMC8       | -0.01416 |
| MED4       | -0.01417 |
| EEF1A1P5   | -0.01419 |
| DGUOK      | -0.01419 |
| MVK        | -0.01419 |
| TOMM7      | -0.01424 |
| FAM32A     | -0.0143  |
| BTBD3      | -0.0143  |
| CTCF       | -0.01434 |
| VPS51      | -0.01434 |
| AC022098.2 | -0.01434 |
| SDAD1P1    | -0.01436 |
| DPH3       | -0.01437 |
| AC074135.1 | -0.01438 |
| C9orf85    | -0.01449 |

|            |          |
|------------|----------|
| C16orf72   | -0.01451 |
| TMEM117    | -0.01451 |
| AC007998.3 | -0.01452 |
| SELENOT    | -0.01452 |
| ZNF607     | -0.01452 |
| CCDC186    | -0.01459 |
| ARL8A      | -0.01459 |
| MFN1       | -0.01461 |
| FAM168A    | -0.0147  |
| PRELID3A   | -0.0147  |
| UBE2B      | -0.01471 |
| CYP27C1    | -0.01475 |
| EPS15L1    | -0.01476 |
| ENDOG      | -0.01479 |
| KPTN       | -0.01481 |
| FBXO8      | -0.01481 |
| ZDHHC16    | -0.01481 |
| HPRT1      | -0.01483 |
| GRN        | -0.01483 |
| L3MBTL2    | -0.01484 |
| PCIF1      | -0.01485 |
| MLLT1      | -0.01486 |
| ULK2       | -0.01487 |
| MIF4GD     | -0.0149  |
| JOSD2      | -0.01493 |
| ZNF592     | -0.01501 |
| DTD1       | -0.01503 |
| EPC2       | -0.01504 |
| ZFYVE1     | -0.01505 |
| EIF2AK2    | -0.01506 |
| FOCAD      | -0.01506 |
| ARHGEF9    | -0.01508 |
| YPEL5      | -0.01511 |
| NEU1       | -0.01513 |
| TBC1D5     | -0.01517 |
| MTBP       | -0.01517 |
| SUPT4H1    | -0.01521 |
| BCKDK      | -0.01521 |
| PAQR8      | -0.01524 |
| UCKL1      | -0.01526 |
| FBXO30     | -0.01529 |
| ELOA-AS1   | -0.0153  |
| TGDS       | -0.01536 |
| DIPK2B     | -0.01542 |
| GFOD2      | -0.01545 |
| SLC39A3    | -0.01546 |
| AMMECR1    | -0.01547 |
| RLIM       | -0.01547 |
| HIBCH      | -0.01548 |

|            |          |
|------------|----------|
| DCTN5      | -0.01548 |
| WDR26      | -0.01552 |
| CCL21      | -0.01553 |
| ZNF394     | -0.01554 |
| INPP1      | -0.01556 |
| EIF1AX     | -0.01556 |
| NBPF14     | -0.01558 |
| AMZ2       | -0.01558 |
| NAP1L3     | -0.0156  |
| RIPOR1     | -0.01565 |
| H2BC20P    | -0.01565 |
| PRMT1      | -0.01566 |
| SLC5A3     | -0.01567 |
| SEC24D     | -0.01567 |
| SNX27      | -0.01568 |
| KCNC3      | -0.01568 |
| MCM3AP     | -0.01569 |
| AGGF1      | -0.01571 |
| RBM4B      | -0.01571 |
| MUS81      | -0.01571 |
| SF3A2      | -0.01571 |
| PTGES2     | -0.01576 |
| COQ8A      | -0.01578 |
| PCDHGB2    | -0.01578 |
| PAK1IP1    | -0.01579 |
| ERVE-1     | -0.0158  |
| AL033519.3 | -0.01581 |
| NR2C2AP    | -0.01583 |
| ZNRF2P1    | -0.01588 |
| RHBDF2     | -0.01589 |
| PREPL      | -0.0159  |
| HNRNPA2B1  | -0.0159  |
| SPECC1L    | -0.01593 |
| PCDHB12    | -0.01596 |
| PSEN2      | -0.01596 |
| NCKAP5L    | -0.01597 |
| TELO2      | -0.01597 |
| AC040160.1 | -0.01598 |
| CENPBD1    | -0.016   |
| ETV4       | -0.01601 |
| GOLGB1     | -0.01603 |
| TLK2       | -0.01604 |
| PPP1R3C    | -0.01605 |
| MAPKAPK2   | -0.01607 |
| NAPA       | -0.01618 |
| INAFM1     | -0.01619 |
| CDK2AP2    | -0.01619 |
| ZNF343     | -0.01619 |
| AFF4       | -0.0162  |

|            |          |
|------------|----------|
| ABCA2      | -0.01624 |
| TAOK2      | -0.01626 |
| DHRS3      | -0.01628 |
| HHAT       | -0.0163  |
| MRFAP1L1   | -0.01632 |
| NFIL3      | -0.01633 |
| EXOC3-AS1  | -0.0164  |
| RWDD3      | -0.0164  |
| SRBD1      | -0.01644 |
| MMGT1      | -0.01644 |
| NPR1       | -0.01645 |
| AP5Z1      | -0.01649 |
| PLVAP      | -0.01649 |
| FAM133B    | -0.0165  |
| AC068888.1 | -0.01651 |
| PSMA4      | -0.01651 |
| PYURF      | -0.01651 |
| TTC38      | -0.01658 |
| TMEM150A   | -0.01662 |
| OR7E14P    | -0.01662 |
| PHGDH      | -0.01662 |
| ZNF200     | -0.01662 |
| NFU1       | -0.01663 |
| SDHB       | -0.01667 |
| ITCH       | -0.01668 |
| TMEM192    | -0.01668 |
| RNF185     | -0.0167  |
| RPP25L     | -0.01671 |
| SSPN       | -0.01671 |
| CSTF2      | -0.01672 |
| SPHK2      | -0.01673 |
| RNF103     | -0.01674 |
| LINC00963  | -0.01676 |
| PRKRA      | -0.01678 |
| SRSF3      | -0.01679 |
| TRIM32     | -0.0168  |
| WDR82      | -0.01683 |
| FAM104A    | -0.01686 |
| PEX11B     | -0.01686 |
| AC145343.1 | -0.01687 |
| MCU        | -0.01692 |
| DLG1       | -0.01693 |
| MAMDC4     | -0.01694 |
| EZH2       | -0.01694 |
| ETAA1      | -0.01699 |
| LINC00654  | -0.01703 |
| DLG3       | -0.01703 |
| PSEN1      | -0.01705 |
| SNX18      | -0.01715 |

|            |          |
|------------|----------|
| RNF14      | -0.01716 |
| SH3BGRL3   | -0.01718 |
| TMEM183B   | -0.0172  |
| AK6        | -0.01723 |
| BRI3BP     | -0.01731 |
| PDCL3      | -0.01733 |
| CNOT9      | -0.01733 |
| TMEM187    | -0.01734 |
| AC107952.2 | -0.01735 |
| CMTM6      | -0.01735 |
| RRAGA      | -0.01739 |
| MOB1B      | -0.01739 |
| TMA7       | -0.01748 |
| RPS27AP5   | -0.01751 |
| AKAP10     | -0.01753 |
| NDUFB5     | -0.01753 |
| LYSMD4     | -0.01753 |
| SEC62      | -0.01756 |
| PSME3IP1   | -0.01763 |
| ITGB8      | -0.01763 |
| TAB3       | -0.01768 |
| TADA1      | -0.01768 |
| MRPL35     | -0.01772 |
| KDM4B      | -0.01772 |
| ATP9A      | -0.01772 |
| RNF181     | -0.01775 |
| SLC25A16   | -0.01778 |
| TENM4      | -0.0178  |
| LUC7L2     | -0.0178  |
| NUCB1      | -0.01783 |
| RAD51AP1   | -0.01786 |
| RNU6-722P  | -0.01787 |
| AC093162.1 | -0.01787 |
| GPATCH11   | -0.01788 |
| STXBP3     | -0.0179  |
| KIAA1671   | -0.01791 |
| IL13RA2    | -0.01798 |
| BNIP1      | -0.01804 |
| DIXDC1     | -0.01809 |
| AL512598.1 | -0.01812 |
| ABRAXAS1   | -0.01813 |
| SIN3B      | -0.01816 |
| LDAH       | -0.01817 |
| WBP1       | -0.01817 |
| HAGH       | -0.01819 |
| ZC3H4      | -0.0182  |
| HMGN2P17   | -0.01821 |
| RNF20      | -0.01821 |
| STXBP6     | -0.01825 |



|            |          |
|------------|----------|
| HERC2      | -0.01825 |
| HOOK2      | -0.01826 |
| NOMO2      | -0.01828 |
| TPR        | -0.01829 |
| PARP6      | -0.01829 |
| FCF1P2     | -0.0183  |
| NFE2L3     | -0.0183  |
| GATA6-AS1  | -0.0183  |
| RPS27L     | -0.01832 |
| BTBD10     | -0.01832 |
| PPP1R18    | -0.01833 |
| MLH1       | -0.01836 |
| AL513477.1 | -0.01836 |
| ACAP3      | -0.0184  |
| RPS11      | -0.0184  |
| HDAC8      | -0.01841 |
| LSG1       | -0.01842 |
| RETREG1    | -0.01842 |
| INSIG2     | -0.01845 |
| CALML5     | -0.01845 |
| PHF10      | -0.01846 |
| RPL27A     | -0.01847 |
| DZIP1      | -0.01849 |
| THAP5      | -0.01853 |
| CREM       | -0.01859 |
| AL662795.2 | -0.01859 |
| ACAD10     | -0.01862 |
| CCL2       | -0.01867 |
| MED7       | -0.01869 |
| LSM10      | -0.01872 |
| TLK1       | -0.01875 |
| KIAA0232   | -0.01882 |
| CLASP1     | -0.01886 |
| C12orf65   | -0.01887 |
| HAUS8      | -0.01888 |
| AKT2       | -0.01888 |
| ZBTB8OS    | -0.01889 |
| SMYD4      | -0.01891 |
| AC025884.1 | -0.01895 |
| CNOT1      | -0.01897 |
| CNTNAP1    | -0.019   |
| NDRG4      | -0.01902 |
| MICOS10    | -0.01904 |
| AC093752.2 | -0.01914 |
| ZNF829     | -0.01914 |
| MCC        | -0.01917 |
| AL136040.1 | -0.01918 |
| DIAPH2     | -0.01918 |
| SLC25A33   | -0.0192  |

|            |          |
|------------|----------|
| MMAB       | -0.01922 |
| SPC24      | -0.01923 |
| WDR83OS    | -0.01923 |
| GTF2IP4    | -0.01925 |
| PKNOX1     | -0.01929 |
| MED31      | -0.0193  |
| MRPL16     | -0.01931 |
| CHD3       | -0.01932 |
| VPS28      | -0.01935 |
| DHX40      | -0.01936 |
| AP1G1      | -0.01938 |
| HAX1       | -0.01939 |
| UEVLD      | -0.01942 |
| NEK6       | -0.01943 |
| GMDS       | -0.01948 |
| PRKAA1     | -0.01952 |
| RECK       | -0.01953 |
| TCF25      | -0.01956 |
| ZNF174     | -0.01964 |
| THAP7-AS1  | -0.01965 |
| TGFBRAP1   | -0.01968 |
| DYNC1LI1   | -0.01971 |
| SUGP1      | -0.01972 |
| AC027117.1 | -0.01974 |
| MIR4740    | -0.01975 |
| ATP7A      | -0.01976 |
| AFTPH      | -0.01976 |
| KDM6B      | -0.0198  |
| TRA2B      | -0.0198  |
| PRMT2      | -0.01982 |
| KRR1       | -0.01982 |
| FOLH1      | -0.01983 |
| DELE1      | -0.01984 |
| TPT1       | -0.01984 |
| STBD1      | -0.01985 |
| SLC11A2    | -0.01985 |
| ZBTB11     | -0.01988 |
| MYO6       | -0.0199  |
| AK2        | -0.01993 |
| PCDHB7     | -0.01995 |
| LINC01106  | -0.01995 |
| RBM4       | -0.01999 |
| PCNA       | -0.01999 |
| WDFY3      | -0.02002 |
| DERL2      | -0.02004 |
| CYC1       | -0.02007 |
| LINC02830  | -0.02013 |
| AC092953.2 | -0.02016 |
| UBA6-AS1   | -0.0202  |

|            |          |
|------------|----------|
| GORAB      | -0.02021 |
| TSPY26P    | -0.02022 |
| ZBTB17     | -0.02026 |
| SKAP2      | -0.02028 |
| ZNF260     | -0.02028 |
| AGPAT3     | -0.02029 |
| LAMTOR3    | -0.0203  |
| SORBS2     | -0.0203  |
| RPS13      | -0.02033 |
| DBF4       | -0.02034 |
| AC012313.2 | -0.02034 |
| DNAJC4     | -0.02035 |
| SNX25      | -0.02037 |
| NAA80      | -0.02038 |
| STK32C     | -0.02038 |
| AC136632.2 | -0.02042 |
| ATXN7L2    | -0.02042 |
| ZBTB38     | -0.02043 |
| EIF3G      | -0.02043 |
| NPY1R      | -0.02044 |
| TRMT5      | -0.02047 |
| PDCL       | -0.02054 |
| MZT1       | -0.02054 |
| AUH        | -0.02056 |
| HSDL2      | -0.02056 |
| UBE2D3     | -0.02058 |
| TMEM65     | -0.02058 |
| FANCG      | -0.0206  |
| SCPEP1     | -0.0206  |
| SUSD1      | -0.02064 |
| TNFSF13    | -0.02065 |
| GPR180     | -0.02065 |
| CRIP1      | -0.02066 |
| DAD1       | -0.02068 |
| AC008915.2 | -0.0207  |
| SRSF8      | -0.02072 |
| AC110749.1 | -0.02078 |
| ALAD       | -0.02078 |
| KMT5B      | -0.02085 |
| BRD3OS     | -0.0209  |
| ERG28      | -0.02091 |
| ELP1       | -0.02092 |
| NUP42      | -0.02096 |
| MIR4645    | -0.02097 |
| TUSC1      | -0.02097 |
| RPS19      | -0.021   |
| TRIM56     | -0.02102 |
| ARHGEF7    | -0.02104 |
| ALG6       | -0.02105 |

|            |          |
|------------|----------|
| RAB17      | -0.02106 |
| FARSA      | -0.02109 |
| EXOSC1     | -0.0211  |
| ZSWIM6     | -0.02113 |
| WAPL       | -0.02118 |
| FAHD2CP    | -0.02123 |
| KDM3B      | -0.02126 |
| KIF13B     | -0.02126 |
| PLEKHH1    | -0.02129 |
| ROMO1      | -0.02133 |
| PLA2G4A    | -0.02135 |
| ZCCHC8     | -0.02137 |
| RAVER2     | -0.02139 |
| DOLK       | -0.0214  |
| RNH1       | -0.02147 |
| TCTA       | -0.02151 |
| COX5B      | -0.02152 |
| AKIP1      | -0.02154 |
| HBEGF      | -0.02154 |
| PRR7       | -0.02156 |
| TARDBP     | -0.02158 |
| KBTBD7     | -0.0216  |
| PITPNM2    | -0.02161 |
| FTH1P4     | -0.02163 |
| TMEM242    | -0.02166 |
| TXNDC9     | -0.02166 |
| LARP7      | -0.02168 |
| ELOC       | -0.02168 |
| HDGFL2     | -0.0217  |
| SMARCE1    | -0.02175 |
| RPP38      | -0.02175 |
| NUP93      | -0.02179 |
| TUBBP5     | -0.02181 |
| UCK1       | -0.02182 |
| ANKFY1     | -0.02182 |
| ANKRD37    | -0.02187 |
| FLT1       | -0.02188 |
| PIH1D1     | -0.02191 |
| ATXN2L     | -0.02191 |
| AC087623.1 | -0.02192 |
| MLXIP      | -0.02192 |
| MIIP       | -0.02195 |
| ARMC8      | -0.02196 |
| R3HDM4     | -0.02197 |
| SPIRE2     | -0.02199 |
| NCOA6      | -0.02199 |
| PCNT       | -0.02205 |
| WDR6       | -0.02206 |
| EDC4       | -0.02207 |

|            |          |
|------------|----------|
| IL13RA1    | -0.02207 |
| PSMD6      | -0.02207 |
| MANEAL     | -0.02211 |
| MT-TF      | -0.02218 |
| CTSE       | -0.0222  |
| DCUN1D3    | -0.0222  |
| ENDOD1     | -0.02222 |
| GET1       | -0.02224 |
| TMEM143    | -0.02225 |
| ELK1       | -0.02227 |
| OSBPL2     | -0.02228 |
| FAM161B    | -0.02233 |
| UBE2A      | -0.02233 |
| GPALPP1    | -0.02235 |
| IBTK       | -0.02235 |
| LINC00888  | -0.02236 |
| USP7       | -0.02238 |
| AC046185.2 | -0.0224  |
| PRDM8      | -0.02242 |
| TTC30A     | -0.02243 |
| CSTF1      | -0.02243 |
| RAB28      | -0.02246 |
| NKAP       | -0.02246 |
| RRN3       | -0.02247 |
| SIL1       | -0.02249 |
| FBXL14     | -0.02251 |
| ACVR2B-AS1 | -0.02251 |
| ABHD16A    | -0.02255 |
| RPL30      | -0.02257 |
| RPS3       | -0.02257 |
| ZNF420     | -0.02259 |
| RLF        | -0.02264 |
| PNMA1      | -0.02266 |
| UHRF1BP1   | -0.02268 |
| AC009303.4 | -0.02274 |
| POMT2      | -0.02276 |
| SNW1       | -0.02278 |
| PPP5C      | -0.02279 |
| PI4K2A     | -0.0228  |
| ACAT1      | -0.02282 |
| ERP44      | -0.02288 |
| ARL6IP1    | -0.02291 |
| MKKS       | -0.02292 |
| ADD3       | -0.02292 |
| TMEM37     | -0.02292 |
| USP33      | -0.02293 |
| DGKQ       | -0.02295 |
| PDE4DIP    | -0.02295 |
| MINK1      | -0.02296 |

|            |          |
|------------|----------|
| COPS4      | -0.02301 |
| ZBTB46     | -0.02302 |
| ADNP2      | -0.02303 |
| INCA1      | -0.02307 |
| RPL9       | -0.02307 |
| AC103810.3 | -0.02309 |
| RNF32      | -0.02314 |
| ATP6V1D    | -0.02319 |
| SRSF1      | -0.0232  |
| AC008014.1 | -0.02322 |
| ZNF207     | -0.02322 |
| MIR4292    | -0.02322 |
| SPOP       | -0.02324 |
| TBCD       | -0.02324 |
| GBAP1      | -0.02324 |
| TRADD      | -0.02325 |
| PEX5       | -0.02325 |
| ARPC4      | -0.02329 |
| XRN2       | -0.02332 |
| DENND5A    | -0.02333 |
| ZNF674     | -0.02334 |
| VEGFB      | -0.02338 |
| Z99572.1   | -0.02339 |
| PEX16      | -0.02344 |
| EMC3-AS1   | -0.02345 |
| DUSP16     | -0.02346 |
| KLF4       | -0.02348 |
| BX284668.4 | -0.02348 |
| ANKRD13B   | -0.02349 |
| VIPAS39    | -0.0235  |
| KIF21A     | -0.02351 |
| AP001372.2 | -0.02354 |
| C16orf70   | -0.02355 |
| MTMR4      | -0.02355 |
| KIFAP3     | -0.02356 |
| RAF1       | -0.02359 |
| MTERF1     | -0.02361 |
| NUS1       | -0.02362 |
| RPL18A     | -0.02366 |
| TMEM18     | -0.02366 |
| SPOPL      | -0.02368 |
| SNRNP35    | -0.02373 |
| DHRS12     | -0.02374 |
| WDR48      | -0.02376 |
| SPATA24    | -0.02378 |
| TRNT1      | -0.02379 |
| FRS3       | -0.02379 |
| RNF141     | -0.02379 |
| CD58       | -0.02382 |

|            |          |
|------------|----------|
| RYR1       | -0.02385 |
| PLK3       | -0.02386 |
| GTPBP3     | -0.02388 |
| MAPKAPK3   | -0.0239  |
| AL731571.1 | -0.02391 |
| PBRM1      | -0.02396 |
| MVP        | -0.02401 |
| APEX1      | -0.02405 |
| LRRC32     | -0.02405 |
| CAMTA1     | -0.02405 |
| CXCR2      | -0.02407 |
| AC008946.1 | -0.02411 |
| COX7A2     | -0.02414 |
| NTN4       | -0.02414 |
| WDR61      | -0.02415 |
| GTF2H2C    | -0.02415 |
| ZNF788P    | -0.02417 |
| CNN3-DT    | -0.02419 |
| ZNF331     | -0.02421 |
| PAM16      | -0.02421 |
| TIMM44     | -0.02422 |
| COP1       | -0.02427 |
| MIR4258    | -0.02429 |
| AC010326.4 | -0.0243  |
| ARRDC1     | -0.02432 |
| KBTBD4     | -0.02434 |
| MIR3936    | -0.02439 |
| UTP18      | -0.02445 |
| PACS2      | -0.02447 |
| TCF12      | -0.02451 |
| CCNG1      | -0.02453 |
| UBA2       | -0.02453 |
| TRAM1      | -0.02453 |
| ZNF774     | -0.02457 |
| HIRIP3     | -0.02458 |
| PSMA1      | -0.02458 |
| SIK3       | -0.0246  |
| RSU1       | -0.02462 |
| ZBTB39     | -0.02465 |
| CHD1L      | -0.02466 |
| PRR15      | -0.02472 |
| PRELP      | -0.02473 |
| TMUB2      | -0.02474 |
| PKP4       | -0.02476 |
| LPP-AS2    | -0.02477 |
| TGIF2      | -0.02478 |
| ZNF793     | -0.02479 |
| AC233723.2 | -0.0248  |
| CDC26      | -0.02482 |

|             |          |
|-------------|----------|
| NAGLU       | -0.02484 |
| CNNM2       | -0.02484 |
| DIS3L       | -0.02486 |
| GSTT2B      | -0.02489 |
| ZNF354A     | -0.02491 |
| TOR1A       | -0.02492 |
| RUFY2       | -0.02492 |
| CCDC82      | -0.02494 |
| RBMX2       | -0.02495 |
| VRK2        | -0.02496 |
| PXN-AS1     | -0.02497 |
| SGSH        | -0.02497 |
| STX1A       | -0.02497 |
| SUPT16H     | -0.02499 |
| SPIN4       | -0.02499 |
| ATP1B3      | -0.02502 |
| CPSF7       | -0.02504 |
| GSKIP       | -0.02506 |
| SNN         | -0.02507 |
| MTF1        | -0.0251  |
| PIN4        | -0.02511 |
| AC124016.1  | -0.02515 |
| VCP         | -0.02515 |
| AL359962.1  | -0.02515 |
| TAF9B       | -0.02519 |
| PPIL2       | -0.02521 |
| CBFB        | -0.02535 |
| FAM118B     | -0.0254  |
| RNASE2      | -0.02542 |
| CDK8        | -0.02543 |
| SAYS1       | -0.02544 |
| KCNN4       | -0.02547 |
| DDX19A      | -0.0255  |
| RBBP7       | -0.0255  |
| SIAH1       | -0.0255  |
| CRYBG1      | -0.0255  |
| LAMTOR5     | -0.02554 |
| ZNF143      | -0.02554 |
| KLK10       | -0.02559 |
| MSRB2       | -0.02561 |
| MSTO1       | -0.02563 |
| BOP1        | -0.02564 |
| GFM2        | -0.02569 |
| CAPN12      | -0.02569 |
| INTS6       | -0.02573 |
| APTX        | -0.02573 |
| CTPS2       | -0.02574 |
| ZSCAN16-AS1 | -0.02577 |
| DYNLRB1     | -0.02578 |



|            |          |
|------------|----------|
| EXD3       | -0.0258  |
| FHOD1      | -0.02583 |
| PITX1      | -0.02583 |
| MRPL57     | -0.02584 |
| TSFM       | -0.02585 |
| GRB7       | -0.02591 |
| KBTBD2     | -0.02594 |
| ACADSB     | -0.02595 |
| MBD3       | -0.02596 |
| GUCA1B     | -0.02599 |
| TWF2       | -0.02599 |
| CCDC57     | -0.02603 |
| KSR1       | -0.02604 |
| UBA6       | -0.02606 |
| RPS26      | -0.02608 |
| AL390719.2 | -0.02609 |
| CEP72      | -0.0261  |
| SEPTIN11   | -0.02612 |
| ZFAS1      | -0.02613 |
| Z98257.1   | -0.02615 |
| RBMXL1     | -0.02616 |
| CHUK       | -0.02617 |
| ZNF718     | -0.02618 |
| MFSD14B    | -0.02619 |
| RFFL       | -0.02624 |
| HMG5       | -0.02624 |
| AL627309.7 | -0.02626 |
| B3GNT2     | -0.02627 |
| ZNF334     | -0.02627 |
| BRF1       | -0.02634 |
| ZYG11B     | -0.02634 |
| COMMD9     | -0.02638 |
| GIGYF2     | -0.02639 |
| AP000580.1 | -0.02642 |
| SOD3       | -0.02648 |
| WDR81      | -0.0265  |
| DBF4B      | -0.02652 |
| TSSK6      | -0.02654 |
| C17orf75   | -0.02656 |
| SPTBN5     | -0.02656 |
| ING5       | -0.02658 |
| AL021807.1 | -0.02661 |
| ICE2       | -0.02664 |
| CCNQ       | -0.02666 |
| HNRNPD     | -0.02673 |
| ATE1       | -0.02675 |
| CWF19L1    | -0.02676 |
| B3GAT3     | -0.02678 |
| EDEM2      | -0.0268  |

|            |          |
|------------|----------|
| ZFP1       | -0.02682 |
| AC016876.1 | -0.02683 |
| MYNN       | -0.02685 |
| MRPL48     | -0.02687 |
| ACBD6      | -0.02695 |
| STARD3     | -0.02696 |
| CADM4      | -0.02697 |
| AP001033.1 | -0.02699 |
| ALMS1-IT1  | -0.02702 |
| KDM5C      | -0.02703 |
| YTHDF3     | -0.02703 |
| SMARCAD1   | -0.02703 |
| ZNF239     | -0.02704 |
| HP1BP3     | -0.02708 |
| CREB3L2    | -0.02711 |
| KIF26A     | -0.02715 |
| ZNF823     | -0.02718 |
| PAQR3      | -0.02718 |
| MPC2       | -0.02719 |
| PIGC       | -0.02726 |
| CCDC106    | -0.02728 |
| XK         | -0.02729 |
| FTO        | -0.0273  |
| ZNF274     | -0.02737 |
| NCOA3      | -0.0274  |
| PNP        | -0.02742 |
| C11orf58   | -0.02753 |
| NBPF3      | -0.02753 |
| LYZ        | -0.02757 |
| IDE        | -0.02769 |
| ASB3       | -0.02772 |
| SUCLG1     | -0.02773 |
| CLINT1     | -0.02781 |
| PDE1A      | -0.02784 |
| PFDN4      | -0.02785 |
| PRPS1      | -0.0279  |
| COG7       | -0.02797 |
| PTDSS2     | -0.02797 |
| MEF2A      | -0.02806 |
| RDH14      | -0.02808 |
| TIAM1      | -0.02812 |
| SNX14      | -0.02812 |
| DHRX       | -0.02815 |
| PDIA5      | -0.02816 |
| PKN2       | -0.02816 |
| MTCYBP18   | -0.02817 |
| C8orf33    | -0.02819 |
| CDC16      | -0.02822 |
| PSTK       | -0.02824 |

|            |          |
|------------|----------|
| GATB       | -0.02826 |
| ZFP91      | -0.02829 |
| RAB12      | -0.0283  |
| DNAJA2     | -0.02832 |
| RNF170     | -0.02833 |
| LRRC28     | -0.02844 |
| EEF1AKMT3  | -0.02853 |
| KDM3A      | -0.02856 |
| EMID1      | -0.02858 |
| PSME4      | -0.02859 |
| FABP4      | -0.02859 |
| ZNF112     | -0.0286  |
| SFXN4      | -0.02861 |
| AC002116.2 | -0.02863 |
| TCEA1P2    | -0.02865 |
| LINC00910  | -0.02866 |
| SNRPB2     | -0.02871 |
| DHPS       | -0.02871 |
| CHMP5      | -0.02872 |
| C1orf74    | -0.02872 |
| MED24      | -0.02875 |
| TTC39A     | -0.02876 |
| CLN5       | -0.02877 |
| DDX51      | -0.02878 |
| RPLP2      | -0.02881 |
| ARL16      | -0.02882 |
| GDPD5      | -0.02882 |
| AL031777.1 | -0.02882 |
| POLRMT     | -0.02882 |
| TRIM52-AS1 | -0.02884 |
| ASNSD1     | -0.02886 |
| TRA2A      | -0.02886 |
| PIGU       | -0.02887 |
| KIDINS220  | -0.02892 |
| IST1       | -0.02898 |
| SLU7       | -0.02899 |
| FANCF      | -0.02899 |
| CEP152     | -0.029   |
| TCTN2      | -0.02905 |
| CLDN2      | -0.02915 |
| FAM102A    | -0.02918 |
| H1-10      | -0.02919 |
| ARPC3      | -0.02919 |
| C1orf115   | -0.0292  |
| CYHR1      | -0.02924 |
| BHLHB9     | -0.02925 |
| PDCD2      | -0.02925 |
| CUL5       | -0.02926 |
| SNHG17     | -0.02931 |

|            |          |
|------------|----------|
| PUF60      | -0.02931 |
| NUBP1      | -0.02931 |
| VBP1       | -0.02934 |
| ZNF75A     | -0.02943 |
| FAM160A2   | -0.02946 |
| TRAPPC2B   | -0.02947 |
| GARRE1     | -0.02947 |
| ATP5ME     | -0.02948 |
| RNASEH2C   | -0.02951 |
| NSD3       | -0.02951 |
| ABALON     | -0.02953 |
| WNK1       | -0.02953 |
| NSUN3      | -0.02955 |
| COPRS      | -0.02956 |
| DCLRE1A    | -0.02959 |
| TAF10      | -0.02964 |
| MCRIP2     | -0.02966 |
| ODF2       | -0.02968 |
| HSPB11     | -0.02969 |
| ING4       | -0.02975 |
| LPAR2      | -0.02976 |
| COX4I2     | -0.02976 |
| CDKN2A     | -0.02987 |
| COX18      | -0.02988 |
| MAN1B1-DT  | -0.02993 |
| AKTIP      | -0.02994 |
| FBXL4      | -0.02995 |
| AP001065.3 | -0.02995 |
| ADAMTSL3   | -0.02995 |
| ALKBH3     | -0.02997 |
| ZKSCAN8    | -0.02997 |
| RPS7       | -0.02997 |
| UBB        | -0.02998 |
| DSG3       | -0.03002 |
| CHRA1      | -0.03006 |
| STK3       | -0.03011 |
| AL078581.2 | -0.03011 |
| NEBL       | -0.03012 |
| GGNBP2     | -0.03014 |
| IVNS1ABP   | -0.03018 |
| LINC01703  | -0.0302  |
| RNASET2    | -0.03026 |
| SARS1      | -0.03027 |
| PPP6R1     | -0.03028 |
| NUF2       | -0.03035 |
| VAX2       | -0.03046 |
| LARP4B     | -0.03047 |
| LINC02159  | -0.03051 |
| ERBIN      | -0.03052 |

|            |          |
|------------|----------|
| RCAN1      | -0.03055 |
| AC245297.3 | -0.03056 |
| RNF217     | -0.03058 |
| PDP2       | -0.03059 |
| MAP2K2     | -0.03059 |
| SNX2       | -0.03063 |
| RASSF10    | -0.03069 |
| EIF1B      | -0.03071 |
| ZNF202     | -0.03072 |
| C11orf49   | -0.03073 |
| TCF7L1     | -0.03078 |
| AC073842.2 | -0.03079 |
| GSN        | -0.03081 |
| RAB3GAP2   | -0.03083 |
| EPB41L5    | -0.03088 |
| CLPP       | -0.03089 |
| ABCD1      | -0.03092 |
| ZNF669     | -0.03092 |
| ZXDC       | -0.03094 |
| RABGGTA    | -0.03095 |
| UGGT2      | -0.03101 |
| SOS1       | -0.03102 |
| SELENOW    | -0.03102 |
| REPS1      | -0.03103 |
| DOK4       | -0.03105 |
| APAF1      | -0.03106 |
| RBX1       | -0.03108 |
| FCER1A     | -0.03109 |
| FLOT2      | -0.03117 |
| AL121949.3 | -0.0312  |
| CEBPG      | -0.03122 |
| CHAF1A     | -0.03122 |
| C1orf131   | -0.03128 |
| TMEM241    | -0.03131 |
| OTUD4      | -0.03133 |
| AC073957.3 | -0.03138 |
| BCDIN3D    | -0.03138 |
| FASTKD5    | -0.03139 |
| C3orf52    | -0.03139 |
| IER2       | -0.0314  |
| ATP6AP2    | -0.0314  |
| PSPC1      | -0.03144 |
| ZNF551     | -0.03145 |
| WDR77      | -0.03145 |
| RAPGEF2    | -0.03148 |
| MIA3       | -0.03148 |
| FAM111B    | -0.0315  |
| MLPH       | -0.0315  |
| FARP1      | -0.03157 |

|            |          |
|------------|----------|
| SRP14P2    | -0.03159 |
| OSBPL3     | -0.03164 |
| SMAD6      | -0.03164 |
| VPS9D1     | -0.03165 |
| CCDC121    | -0.0317  |
| FOXO6-AS1  | -0.03171 |
| ERI2       | -0.03172 |
| BNIP1      | -0.03173 |
| IK         | -0.03178 |
| OR2A7      | -0.03178 |
| RIPK2      | -0.03186 |
| CARS2      | -0.03188 |
| AC092794.1 | -0.03188 |
| TSEN2      | -0.03191 |
| NCOA4      | -0.03205 |
| RAD54L2    | -0.03215 |
| AP005018.2 | -0.03217 |
| BSCL2      | -0.03231 |
| R3HDM2     | -0.03234 |
| ARL4A      | -0.03235 |
| MRRF       | -0.03235 |
| MKS1       | -0.03237 |
| SLC35E2B   | -0.03238 |
| WFDC2      | -0.03238 |
| FOXD2      | -0.0324  |
| DCAF8      | -0.03241 |
| HSD17B6    | -0.03245 |
| PIAS4      | -0.03245 |
| ZFP36L1    | -0.03248 |
| ZNF84      | -0.03253 |
| FPGT       | -0.03254 |
| AC009118.3 | -0.03255 |
| TUT7       | -0.03256 |
| DUS3L      | -0.03258 |
| DDX46      | -0.0326  |
| C5orf63    | -0.03261 |
| ALG10B     | -0.03269 |
| CDNF       | -0.0327  |
| TIAL1      | -0.03271 |
| ORC4       | -0.03272 |
| TMEM109    | -0.03274 |
| AF001548.2 | -0.03275 |
| FAM86FP    | -0.03277 |
| UFL1       | -0.03277 |
| SPIN2B     | -0.03279 |
| RAD17      | -0.03281 |
| SLC27A1    | -0.03282 |
| SHMT2      | -0.03286 |
| DNAJC16    | -0.0329  |

|            |          |
|------------|----------|
| HSD11B1L   | -0.03292 |
| ZNF830     | -0.03294 |
| MON1B      | -0.03294 |
| SMYD2      | -0.03295 |
| TSHZ1      | -0.033   |
| GDPD1      | -0.03303 |
| EHBP1L1    | -0.03306 |
| TCEAL8     | -0.03309 |
| SUPT20H    | -0.03311 |
| PEPD       | -0.03313 |
| DNAJA1     | -0.03317 |
| NBPF1      | -0.03319 |
| UGCG       | -0.03321 |
| C8orf31    | -0.03322 |
| AC016888.1 | -0.03325 |
| SAR1B      | -0.03326 |
| CLPB       | -0.0333  |
| CEP104     | -0.0333  |
| PPP1CC     | -0.0333  |
| ACOT7      | -0.03334 |
| RTL8A      | -0.03337 |
| TEF        | -0.0334  |
| NBR2       | -0.03341 |
| TOMM5      | -0.03347 |
| COG1       | -0.03348 |
| CREB3L1    | -0.03348 |
| TENT4A     | -0.03349 |
| ROBO4      | -0.03353 |
| ZNF263     | -0.03355 |
| AMIGO1     | -0.03359 |
| ZNF528     | -0.03359 |
| AC115618.3 | -0.0336  |
| ARHGAP12   | -0.03361 |
| ENOX2      | -0.03363 |
| CFB        | -0.03364 |
| RRP8       | -0.03365 |
| CD2BP2-DT  | -0.03368 |
| PLPP7      | -0.03369 |
| USE1       | -0.03383 |
| SUGT1P1    | -0.03383 |
| HSD17B1P1  | -0.03385 |
| ATG4C      | -0.03385 |
| LAMP2      | -0.03388 |
| NNMT       | -0.03389 |
| NAP1L4     | -0.03391 |
| CRNKL1     | -0.03392 |
| LSM14A     | -0.03392 |
| PPP6C      | -0.03395 |
| KLHL17     | -0.03396 |

|            |          |
|------------|----------|
| PBDC1      | -0.03397 |
| TERF1      | -0.0341  |
| PPP2R2D    | -0.0341  |
| AL391422.1 | -0.03421 |
| LTK        | -0.03422 |
| TMEM126B   | -0.03424 |
| PLXNB1     | -0.03427 |
| DNM2       | -0.03429 |
| MIOS       | -0.03429 |
| ANKRD39    | -0.0343  |
| RPS6KB2    | -0.03431 |
| GOSR2      | -0.03435 |
| EXOSC7     | -0.03435 |
| NRP1       | -0.03442 |
| MAK16      | -0.03454 |
| RPL13A     | -0.03458 |
| RPLP1      | -0.03458 |
| AC135721.1 | -0.03459 |
| MAPK9      | -0.0346  |
| POP1       | -0.0346  |
| PRELID2P1  | -0.03462 |
| MPPE1      | -0.03464 |
| PNRC2      | -0.03467 |
| NOP9       | -0.03469 |
| STRIP1     | -0.03469 |
| YWHAH      | -0.03469 |
| TTC37      | -0.03471 |
| AC142472.1 | -0.03475 |
| E2F1       | -0.03475 |
| PTK2       | -0.03476 |
| SPATS2     | -0.03477 |
| GREM2      | -0.03479 |
| CLIC5      | -0.03483 |
| GPATCH2    | -0.03486 |
| CCDC25     | -0.03486 |
| PRXL2C     | -0.03489 |
| FBXO44     | -0.0349  |
| ACYP2      | -0.03491 |
| PGBD1      | -0.03493 |
| THADA      | -0.03494 |
| AP000894.4 | -0.03498 |
| TXNL4B     | -0.03498 |
| NCOA7      | -0.03501 |
| ARPC5      | -0.03505 |
| TBC1D20    | -0.03506 |
| SFTA3      | -0.03506 |
| CASC3      | -0.0351  |
| NOVA2      | -0.0351  |
| AL133517.1 | -0.03511 |



|            |          |
|------------|----------|
| CAB39L     | -0.03515 |
| PIK3R3     | -0.03521 |
| IMPA1      | -0.03523 |
| HEATR6     | -0.03532 |
| PLPP5      | -0.03533 |
| SRPRB      | -0.03537 |
| PPP3CB     | -0.03537 |
| HSD17B10   | -0.03538 |
| ZNF644     | -0.0354  |
| NOL9       | -0.03542 |
| RPAP2      | -0.03544 |
| HACD3      | -0.03546 |
| AC005041.3 | -0.03548 |
| COQ10B     | -0.03548 |
| NAP1L2     | -0.03552 |
| RCHY1      | -0.03553 |
| ATAD3B     | -0.03554 |
| ACTR8      | -0.03558 |
| PUM3       | -0.03558 |
| MIR659     | -0.0356  |
| TRAPPC11   | -0.0356  |
| HNRNPLL    | -0.03562 |
| ARAP3      | -0.03563 |
| AL139384.1 | -0.03564 |
| ATP6V1A    | -0.03565 |
| C9orf78    | -0.03567 |
| GPATCH8    | -0.0357  |
| CFAP410    | -0.03572 |
| TANK       | -0.03573 |
| MTFR1      | -0.03575 |
| FANCL      | -0.03575 |
| TMPPE      | -0.03576 |
| RABAC1     | -0.03576 |
| MACC1      | -0.03577 |
| MIR181A2HG | -0.03578 |
| HINT1      | -0.03581 |
| SSX2IP     | -0.03582 |
| TRAPPC12   | -0.03582 |
| LTV1       | -0.03586 |
| KRIT1      | -0.03592 |
| NOC3L      | -0.03594 |
| PLAGL2     | -0.03594 |
| CNIH1      | -0.03598 |
| LINC01003  | -0.03601 |
| EFCAB11    | -0.03601 |
| TMBIM4     | -0.03601 |
| ACSM3      | -0.03602 |
| AC027644.3 | -0.03608 |
| FAM162B    | -0.03609 |

|            |          |
|------------|----------|
| LIMD1      | -0.0361  |
| DDX6       | -0.03618 |
| TRAF2      | -0.03619 |
| WDR33      | -0.0362  |
| NEK4       | -0.03622 |
| SLTM       | -0.03627 |
| AC007663.1 | -0.0363  |
| MIB2       | -0.03633 |
| RBM41      | -0.03634 |
| LAGE3      | -0.03635 |
| STAM2      | -0.03637 |
| TCERG1     | -0.03638 |
| CDK4       | -0.0364  |
| DYNLT3     | -0.03641 |
| TMEM134    | -0.03641 |
| EPPK1      | -0.03643 |
| RPS19BP1   | -0.03644 |
| GPR160     | -0.0365  |
| FAM120B    | -0.03652 |
| PKN1       | -0.03653 |
| RUNX2      | -0.03654 |
| LYPD6B     | -0.03655 |
| TASOR2     | -0.03656 |
| PPHLN1     | -0.03657 |
| C12orf45   | -0.03658 |
| RBM19      | -0.0366  |
| GGT6       | -0.0367  |
| ZNF888     | -0.03671 |
| GLE1       | -0.03671 |
| MAPRE3     | -0.03675 |
| LURAP1L    | -0.03675 |
| LYPLA1     | -0.03682 |
| PNMA2      | -0.03682 |
| ZNF845     | -0.03683 |
| SMDT1      | -0.03685 |
| ZNF283     | -0.03685 |
| SPG7       | -0.03692 |
| UTP23      | -0.03692 |
| TRIM33     | -0.03693 |
| DDX28      | -0.03696 |
| SCARB2     | -0.03701 |
| NR1D2      | -0.03703 |
| COL6A3     | -0.03706 |
| ELAPOR2    | -0.03707 |
| MRPS18C    | -0.03709 |
| CPOX       | -0.03715 |
| C3orf14    | -0.03715 |
| SUOX       | -0.03716 |
| PLEKHM1    | -0.03719 |

|            |          |
|------------|----------|
| AC025171.1 | -0.03724 |
| CKS2       | -0.03727 |
| MIEF1      | -0.0373  |
| TMEM126A   | -0.03731 |
| CIAO1      | -0.03733 |
| ZFPM1      | -0.03733 |
| BPTF       | -0.03738 |
| ZNF655     | -0.0374  |
| TRIM26     | -0.03741 |
| BLVRA      | -0.03741 |
| NDUFB7     | -0.03743 |
| PNKP       | -0.03749 |
| USP4       | -0.03751 |
| HSD17B11   | -0.03754 |
| SIRT6      | -0.03755 |
| GALM       | -0.03755 |
| GADD45A    | -0.03757 |
| BRD4       | -0.03762 |
| CEP44      | -0.03765 |
| TLE3       | -0.03771 |
| CISH       | -0.03772 |
| SLC16A7    | -0.03772 |
| ARHGAP44   | -0.03772 |
| NAA20      | -0.03775 |
| MAPK8      | -0.03779 |
| MAGEE1     | -0.03783 |
| SMPD1      | -0.03783 |
| NRAV       | -0.03787 |
| CTXN1      | -0.03791 |
| NF1        | -0.03791 |
| IGKV1D-27  | -0.03792 |
| CCDC107    | -0.03793 |
| ANKRD50    | -0.03797 |
| AC068870.2 | -0.03798 |
| SOCS7      | -0.03799 |
| INO80      | -0.038   |
| QSOX2      | -0.03801 |
| SDHAF2     | -0.03803 |
| PGGT1B     | -0.03807 |
| PHF20      | -0.03808 |
| HUS1       | -0.03809 |
| MC1R       | -0.0381  |
| VRK3       | -0.03811 |
| PRPF4B     | -0.03814 |
| GATA6      | -0.03816 |
| MAN1A2     | -0.03818 |
| SDCBP      | -0.03821 |
| CPLANE1    | -0.03822 |
| PUM2       | -0.03825 |

|             |          |
|-------------|----------|
| USP47       | -0.03827 |
| MTHFD1      | -0.03829 |
| ZNF517      | -0.0383  |
| GPATCH1     | -0.03831 |
| CMTR1       | -0.03833 |
| ZNF585B     | -0.03834 |
| BMP7        | -0.03836 |
| STON1       | -0.03836 |
| BLOC1S2     | -0.03838 |
| EEF1D       | -0.03844 |
| DENND2C     | -0.03845 |
| GLMN        | -0.0385  |
| USP11       | -0.03852 |
| RB1CC1      | -0.03861 |
| SLC30A7     | -0.03862 |
| JAK1        | -0.03865 |
| COQ4        | -0.03867 |
| GABARAPL2   | -0.03869 |
| CISD2       | -0.0387  |
| RNASEH2A    | -0.0387  |
| RASGRP3-AS1 | -0.03882 |
| AC113191.1  | -0.03888 |
| MPHOSPH6    | -0.03889 |
| AL138756.1  | -0.03899 |
| COQ2        | -0.039   |
| PABPC1P3    | -0.03903 |
| TMEM125     | -0.03906 |
| U2AF2       | -0.03906 |
| TSTD2       | -0.03912 |
| ESRP1       | -0.03913 |
| VTI1A       | -0.03915 |
| ZBTB44      | -0.03916 |
| SIRT4       | -0.03917 |
| PFDN5       | -0.03918 |
| PLEKHJ1     | -0.03922 |
| TIGAR       | -0.03923 |
| EPHA4       | -0.03933 |
| LMO3        | -0.03938 |
| PQBP1       | -0.03939 |
| AACS        | -0.03939 |
| VPS35L      | -0.03944 |
| HEATR5B     | -0.03944 |
| TTI2        | -0.03946 |
| MAPKAPK5    | -0.03948 |
| NDUFB8      | -0.0395  |
| TMSB4XP8    | -0.03954 |
| SRRM1       | -0.03955 |
| MRAS        | -0.03955 |
| RAPH1       | -0.03956 |

|            |          |
|------------|----------|
| NDUFA7     | -0.03957 |
| ST6GALNAC5 | -0.03958 |
| HSD17B4    | -0.03971 |
| AC069282.1 | -0.03971 |
| RP9        | -0.03973 |
| MIR3186    | -0.03978 |
| GTDC1      | -0.03982 |
| C2CD3      | -0.03983 |
| SNHG6      | -0.03984 |
| SYS1       | -0.03987 |
| ZC3H14     | -0.03987 |
| HMGN4      | -0.03987 |
| MAFF       | -0.03993 |
| AC069547.1 | -0.03997 |
| COLEC12    | -0.03998 |
| TM9SF1     | -0.03999 |
| TLN1       | -0.04003 |
| LIG1       | -0.04003 |
| VPS26C     | -0.04003 |
| PRDM11     | -0.04003 |
| CKMT2-AS1  | -0.04005 |
| C19orf73   | -0.04007 |
| ASB8       | -0.04007 |
| ITGA1      | -0.04011 |
| AC020910.6 | -0.04011 |
| DDX3X      | -0.04011 |
| DLST       | -0.04011 |
| DSN1       | -0.04012 |
| ZNF500     | -0.04016 |
| XPO7       | -0.0402  |
| PSMC1      | -0.04022 |
| GPM6B      | -0.04022 |
| POLR3E     | -0.04025 |
| AP5S1      | -0.04026 |
| SETD4      | -0.04028 |
| EFS        | -0.04033 |
| UBXN4      | -0.04035 |
| C11orf98   | -0.04037 |
| VIRMA      | -0.04044 |
| PPP1R12A   | -0.04045 |
| TAF1D      | -0.04051 |
| RPS15A     | -0.04052 |
| SHQ1       | -0.04052 |
| USP28      | -0.04052 |
| MIR3936HG  | -0.04053 |
| RNF157     | -0.04054 |
| AFF3       | -0.04056 |
| STX3       | -0.04058 |
| NAPG       | -0.04059 |

|            |          |
|------------|----------|
| UPF2       | -0.0406  |
| PDE12      | -0.04061 |
| AC024560.3 | -0.04064 |
| FGFR2      | -0.04067 |
| MTCH2      | -0.04075 |
| AC087501.4 | -0.04075 |
| OSER1-DT   | -0.04076 |
| TMED10P2   | -0.04076 |
| TBP        | -0.0408  |
| COPE       | -0.04083 |
| SLC25A44   | -0.04087 |
| TM7SF2     | -0.04089 |
| MAP1LC3B   | -0.0409  |
| LINC00623  | -0.0409  |
| CT83       | -0.04092 |
| LTN1       | -0.04093 |
| RSL24D1P6  | -0.04093 |
| LINC00672  | -0.04093 |
| UNC119B    | -0.04094 |
| LIN37      | -0.04098 |
| LRRC37BP1  | -0.04103 |
| BARD1      | -0.04113 |
| RPS28      | -0.04115 |
| SMIM20     | -0.04117 |
| GNPDA1     | -0.0412  |
| TMEM258    | -0.04121 |
| ASB13      | -0.04121 |
| AL158166.2 | -0.04123 |
| AC097639.1 | -0.04123 |
| PIGO       | -0.04124 |
| AC068338.2 | -0.04124 |
| MNX1-AS1   | -0.04125 |
| METTL15P1  | -0.04128 |
| GPR173     | -0.04129 |
| TM4SF18    | -0.0413  |
| CCDC122    | -0.04131 |
| ZNF2       | -0.04132 |
| RPS21      | -0.04135 |
| TCEAL1     | -0.04136 |
| AC124248.1 | -0.04138 |
| MTARC2     | -0.04138 |
| ZNF696     | -0.04145 |
| AP1M1      | -0.04147 |
| AC004130.2 | -0.04147 |
| TONSL-AS1  | -0.04148 |
| AC132942.1 | -0.04149 |
| SPRTN      | -0.04152 |
| SIRT3      | -0.04152 |
| CHD1       | -0.04159 |

|            |          |
|------------|----------|
| STX18      | -0.0416  |
| RWDD1      | -0.04162 |
| AL356356.1 | -0.04165 |
| SART3      | -0.04166 |
| NEPRO      | -0.04166 |
| SNRPGP10   | -0.04167 |
| SLC7A2     | -0.04169 |
| FRG1       | -0.04172 |
| SHKBP1     | -0.04177 |
| AC009309.1 | -0.04179 |
| PWWP3A     | -0.0418  |
| KAT7       | -0.04181 |
| BLOC1S6    | -0.04181 |
| PPCDC      | -0.04183 |
| VMA21      | -0.04185 |
| FCGRT      | -0.04185 |
| MED25      | -0.04191 |
| C22orf39   | -0.04192 |
| METTL15    | -0.04192 |
| HACL1      | -0.04193 |
| PPIL3      | -0.04196 |
| PAFAH1B3   | -0.04196 |
| AKAP13     | -0.04198 |
| C6orf99    | -0.04199 |
| REEP2      | -0.04202 |
| CD46       | -0.04203 |
| BICRAL     | -0.04204 |
| ZC3H15     | -0.04207 |
| AC005840.2 | -0.04211 |
| PDIA4      | -0.04214 |
| LRSAM1     | -0.04215 |
| AC110285.2 | -0.04223 |
| NISCH      | -0.0423  |
| FBXL12     | -0.04231 |
| ZNF609     | -0.04232 |
| SAFB       | -0.04238 |
| ARID3B     | -0.0424  |
| SGMS1      | -0.04242 |
| PLXND1     | -0.04242 |
| BRSK1      | -0.04243 |
| AC136628.3 | -0.04244 |
| AC092747.4 | -0.04263 |
| HMOX2      | -0.04265 |
| GLDN       | -0.04268 |
| ZNF404     | -0.04268 |
| SNHG7      | -0.04273 |
| ZDBF2      | -0.04275 |
| UTP3       | -0.04276 |
| NCEH1      | -0.0428  |

|            |          |
|------------|----------|
| FBXO42     | -0.04282 |
| MT-CO2     | -0.04285 |
| TRIB1      | -0.04288 |
| R3HCC1     | -0.04292 |
| GTF2B      | -0.04294 |
| MGC32805   | -0.04296 |
| TUT1       | -0.04298 |
| TARS3      | -0.04298 |
| MVD        | -0.04299 |
| SFSWAP     | -0.04299 |
| APCDD1     | -0.04301 |
| BORCS5     | -0.04301 |
| EXOSC6     | -0.04303 |
| DENND11    | -0.04305 |
| GRID2IP    | -0.04307 |
| C8orf48    | -0.04309 |
| ZSCAN26    | -0.0431  |
| CYB5D1     | -0.0431  |
| SRRM2      | -0.04311 |
| MFSD9      | -0.04312 |
| MFSD14A    | -0.04313 |
| AC005682.1 | -0.04314 |
| ASF1B      | -0.04315 |
| LTBP4      | -0.04318 |
| ORAI1      | -0.04319 |
| FECH       | -0.04319 |
| ARFIP1     | -0.04321 |
| MYLIP      | -0.04321 |
| PPP4R3B    | -0.04322 |
| GNAI2      | -0.04325 |
| ECHDC1     | -0.04327 |
| STRIP2     | -0.04327 |
| ECH1       | -0.04328 |
| AIM2       | -0.04328 |
| ZNF875     | -0.04329 |
| ZNF35      | -0.04332 |
| STIM1      | -0.04333 |
| NBPF9      | -0.04336 |
| LZTS3      | -0.04348 |
| NOL8       | -0.0435  |
| BCAS3      | -0.04352 |
| MAP4K3-DT  | -0.04355 |
| LINC01144  | -0.04356 |
| TRAPPC2L   | -0.0436  |
| ZNF232-AS1 | -0.04361 |
| TANC1      | -0.04362 |
| NEURL4     | -0.04367 |
| EIF4ENIF1  | -0.04367 |
| PSMD10     | -0.04369 |



|            |          |
|------------|----------|
| IGHMBP2    | -0.04369 |
| KYAT3      | -0.0437  |
| CCAR1      | -0.04374 |
| USP6NL     | -0.04379 |
| PIGM       | -0.04383 |
| C9orf152   | -0.04384 |
| DHX35      | -0.04387 |
| FNDC3A     | -0.04388 |
| CALR       | -0.04389 |
| NSL1       | -0.04395 |
| KDM2A      | -0.04397 |
| OLMALINC   | -0.04398 |
| GTF2E2     | -0.04403 |
| GTF3C6     | -0.04404 |
| AC093909.6 | -0.04405 |
| LDLRAD2    | -0.04408 |
| ARV1       | -0.04413 |
| DTWD1      | -0.04413 |
| TIMM8AP1   | -0.04414 |
| AL122010.1 | -0.04414 |
| CTR9       | -0.04414 |
| UQCC1      | -0.04416 |
| POMP       | -0.04418 |
| TEC        | -0.0442  |
| TRIM25     | -0.04422 |
| CCL23      | -0.04424 |
| FES        | -0.04434 |
| ROM1       | -0.04434 |
| PDE6D      | -0.04436 |
| CPSF2      | -0.04439 |
| AC245060.4 | -0.04439 |
| ARNT2      | -0.0444  |
| KLF7       | -0.04442 |
| SLC39A9    | -0.04443 |
| EHF        | -0.04443 |
| ADCY9      | -0.04445 |
| TP73-AS1   | -0.04446 |
| AL049873.2 | -0.04454 |
| EIF5       | -0.04458 |
| SLC25A46   | -0.04459 |
| NDUFS3     | -0.0446  |
| SEMA5B     | -0.04462 |
| ZNF354C    | -0.04464 |
| KMT2B      | -0.04465 |
| CPNE3      | -0.04465 |
| FASTKD1    | -0.04467 |
| GSDMC      | -0.04471 |
| ARAF       | -0.04473 |
| PHLDB3     | -0.04476 |

|            |          |
|------------|----------|
| TAB2       | -0.04481 |
| NEMP2      | -0.04483 |
| CCDC80     | -0.04485 |
| AC027796.4 | -0.04485 |
| DLG5-AS1   | -0.04491 |
| ZFYVE27    | -0.04491 |
| AL359881.1 | -0.04494 |
| MAP3K9     | -0.04494 |
| MBD5       | -0.04494 |
| C12orf76   | -0.04495 |
| MIR4701    | -0.045   |
| ZBTB2      | -0.04505 |
| SNRPD1     | -0.04505 |
| SPOCK3     | -0.04507 |
| PDSS1      | -0.04507 |
| AL133466.1 | -0.04509 |
| KCTD13     | -0.04511 |
| SRSF4      | -0.04512 |
| HOXD1      | -0.04518 |
| GOLGA4     | -0.0452  |
| AP001024.1 | -0.04522 |
| TIMM50     | -0.04524 |
| USP9X      | -0.04524 |
| ZNF584     | -0.04528 |
| PGS1       | -0.04528 |
| PPAN       | -0.04529 |
| CASP3      | -0.04533 |
| NPC1       | -0.04534 |
| ST6GALNAC6 | -0.04534 |
| AVPR1A     | -0.04535 |
| GDI2       | -0.04537 |
| HSPA1L     | -0.04538 |
| KAT6A      | -0.04546 |
| PIBF1      | -0.04551 |
| PPP4R2     | -0.04552 |
| CCN5       | -0.04555 |
| ZCCHC10    | -0.04564 |
| USP25      | -0.04564 |
| AL357140.2 | -0.04567 |
| SLCO3A1    | -0.04569 |
| ZNF45      | -0.04571 |
| CCDC183    | -0.04574 |
| XRCC1      | -0.04574 |
| AC008443.4 | -0.04575 |
| JUN        | -0.04578 |
| RPA2       | -0.0458  |
| GNRHR2     | -0.04581 |
| METTL14    | -0.04582 |
| IRAG1      | -0.04584 |

|            |          |
|------------|----------|
| PCDHB16    | -0.04584 |
| DAAM1      | -0.04585 |
| WDR11      | -0.04585 |
| FCHO2      | -0.04588 |
| AL049870.3 | -0.0459  |
| RAB11FIP2  | -0.04592 |
| CLEC16A    | -0.04593 |
| SUCO       | -0.04593 |
| SON        | -0.04594 |
| ABCC9      | -0.04594 |
| G2E3       | -0.04596 |
| NUFIP2     | -0.04603 |
| COMTD1     | -0.04603 |
| AC010894.1 | -0.04604 |
| PNPT1      | -0.04608 |
| RSF1       | -0.04608 |
| AC006001.2 | -0.0461  |
| TRMT44     | -0.04613 |
| GGT5       | -0.04616 |
| SNHG21     | -0.04617 |
| ARMCX1     | -0.04619 |
| LSM8       | -0.0462  |
| LRP3       | -0.04621 |
| SSBP2      | -0.04623 |
| ZNF197     | -0.04628 |
| RAB11FIP4  | -0.04628 |
| SNORA77    | -0.04628 |
| QDPR       | -0.04632 |
| AC012313.1 | -0.04633 |
| BMI1       | -0.04636 |
| AC064836.2 | -0.04638 |
| ADIRF-AS1  | -0.04645 |
| DNAJC28    | -0.04647 |
| MYLK-AS1   | -0.04647 |
| SULT1C4    | -0.04648 |
| SLC12A6    | -0.04649 |
| PMS2P4     | -0.04649 |
| MEX3C      | -0.04656 |
| AC008966.2 | -0.04657 |
| NUDT7      | -0.04657 |
| EIF1       | -0.04659 |
| XPA        | -0.04659 |
| SS18L1     | -0.04659 |
| SCRIB      | -0.0466  |
| GINS1      | -0.04663 |
| FBXW9      | -0.04667 |
| SMIM4      | -0.04668 |
| BBS10      | -0.04668 |
| TBC1D22A   | -0.04671 |

|            |          |
|------------|----------|
| ZFHX3      | -0.04671 |
| GSE1       | -0.04672 |
| MRTFA      | -0.04672 |
| HS1BP3     | -0.04673 |
| HOXB2      | -0.04673 |
| UBA52      | -0.04676 |
| TTF2       | -0.04678 |
| MTIF3      | -0.04686 |
| RPSAP19    | -0.04687 |
| GATD1      | -0.0469  |
| ASCC3      | -0.04692 |
| MRPS6      | -0.04698 |
| ZNF530     | -0.04698 |
| SYCE1L     | -0.047   |
| U91328.1   | -0.04701 |
| TNKS2      | -0.04701 |
| EHMT1      | -0.04702 |
| AC073343.1 | -0.04702 |
| PTOV1-AS1  | -0.04702 |
| TRIM15     | -0.04702 |
| PRDM10     | -0.04706 |
| MGME1      | -0.04709 |
| SMAD4      | -0.0471  |
| PLA2G15    | -0.04718 |
| CYP1B1     | -0.04718 |
| PAK1       | -0.0472  |
| MUTYH      | -0.0472  |
| WRAP73     | -0.04723 |
| CNOT11     | -0.04724 |
| KIF26B     | -0.04725 |
| AC010422.3 | -0.04727 |
| NDUFV2     | -0.04727 |
| PHF12      | -0.04731 |
| BCAT2      | -0.04731 |
| KIF3B      | -0.04732 |
| COX16      | -0.04734 |
| MIR6772    | -0.04738 |
| JPX        | -0.0474  |
| POLD4      | -0.0474  |
| RNF43      | -0.04745 |
| JUNB       | -0.04752 |
| ELF2       | -0.04753 |
| HAUS6      | -0.04757 |
| ZNF320     | -0.04759 |
| ZCCHC3     | -0.04759 |
| ZC3H10     | -0.0476  |
| MMAA       | -0.04762 |
| DHRS7B     | -0.04763 |
| STARD7-AS1 | -0.04765 |

|            |          |
|------------|----------|
| YPEL3      | -0.04768 |
| CAPZB      | -0.0477  |
| TIGD7      | -0.04771 |
| NKX2-1-AS1 | -0.04775 |
| RBBP6      | -0.04786 |
| CADM1      | -0.0479  |
| LMAN1      | -0.04794 |
| ZCCHC4     | -0.04794 |
| ZC3HAV1    | -0.04797 |
| CCNJ       | -0.04799 |
| ALG10      | -0.04802 |
| RUBCN      | -0.04802 |
| L3MBTL3    | -0.04803 |
| INO80B     | -0.04807 |
| CAPN7      | -0.04809 |
| BEX4       | -0.04814 |
| MRPL42     | -0.04814 |
| FARP2      | -0.04818 |
| SLC25A20   | -0.04819 |
| SRI        | -0.0482  |
| PSMB5      | -0.04822 |
| RAB3IL1    | -0.04826 |
| FAM102B    | -0.04827 |
| SEMA5A     | -0.04828 |
| ABI1       | -0.04833 |
| ZNF321P    | -0.04834 |
| MTURN      | -0.04834 |
| PLCD4      | -0.04837 |
| AC073896.3 | -0.04838 |
| MINCR      | -0.04842 |
| ARMH3      | -0.04843 |
| CEP70      | -0.04844 |
| PHKG2      | -0.04845 |
| SAMD8      | -0.04847 |
| ESYT3      | -0.04853 |
| RPL10      | -0.04855 |
| UBN2       | -0.04855 |
| SF3B5      | -0.04859 |
| PRKCZ-AS1  | -0.04861 |
| FYCO1      | -0.04863 |
| UQCC3      | -0.04876 |
| DIS3L2     | -0.04876 |
| CX3CL1     | -0.04881 |
| RAP2C      | -0.04886 |
| TMPO-AS1   | -0.04886 |
| VPS41      | -0.04888 |
| REXO1      | -0.04891 |
| ZNF567     | -0.04892 |
| MIR503HG   | -0.04895 |

|            |          |
|------------|----------|
| STARD13    | -0.04895 |
| SLIRP      | -0.04903 |
| DIMT1      | -0.04903 |
| C1GALT1C1  | -0.04903 |
| NEDD8      | -0.04907 |
| OSBPL10    | -0.04907 |
| UQCC2      | -0.0491  |
| HIKESHI    | -0.04912 |
| NDUFA11    | -0.04915 |
| SNX6       | -0.04917 |
| FBXO38     | -0.04917 |
| MSANTD4    | -0.04923 |
| HNRNPUL2   | -0.04927 |
| AP3M2      | -0.04928 |
| AMBRA1     | -0.04929 |
| RAP1GAP2   | -0.04931 |
| DCAF17     | -0.04932 |
| NIPSNAP3A  | -0.04936 |
| ESAM       | -0.04937 |
| SUB1       | -0.04939 |
| CDON       | -0.04944 |
| CAMTA2     | -0.04945 |
| PHF2       | -0.04945 |
| LINC01436  | -0.04946 |
| TBCK       | -0.04948 |
| SAMD9      | -0.04952 |
| YTHDC1     | -0.0496  |
| PRB4       | -0.0496  |
| AP002990.1 | -0.04961 |
| MIF-AS1    | -0.04964 |
| POU5F1     | -0.04965 |
| ZNF766     | -0.04971 |
| SERPINB8   | -0.04971 |
| AC091057.1 | -0.04972 |
| AC138356.2 | -0.04972 |
| PECR       | -0.04973 |
| USP30      | -0.04975 |
| MAPK8IP1   | -0.04976 |
| IDNK       | -0.04981 |
| PRDX2      | -0.04988 |
| ANKRD42    | -0.04993 |
| ATP6V0D1   | -0.04998 |
| KAT2A      | -0.04999 |
| AL135905.1 | -0.05002 |
| SAAL1      | -0.05005 |
| HGH1       | -0.0501  |
| HSD17B12   | -0.0501  |
| OSBPL7     | -0.05013 |
| CLBA1      | -0.05017 |

|            |          |
|------------|----------|
| RERE       | -0.05017 |
| COX10-AS1  | -0.05019 |
| MT-ND4L    | -0.05026 |
| TTC17      | -0.05027 |
| RPP14      | -0.05028 |
| CDK12      | -0.05029 |
| AC006504.5 | -0.05031 |
| HIGD1B     | -0.05034 |
| FBXO11     | -0.05037 |
| RPS16      | -0.05038 |
| MROH1      | -0.05038 |
| CD81       | -0.05039 |
| ZNF761     | -0.05039 |
| FBH1       | -0.0504  |
| C2orf42    | -0.05043 |
| AL137186.2 | -0.05046 |
| BBS2       | -0.05046 |
| MOSPD1     | -0.05046 |
| PPM1F      | -0.05048 |
| LINC00630  | -0.05051 |
| HSPE1      | -0.05052 |
| UBR2       | -0.05052 |
| RAP1GDS1   | -0.05052 |
| CSNK1G2    | -0.05054 |
| MIS12      | -0.05056 |
| AC090114.2 | -0.05059 |
| ORAI2      | -0.0506  |
| SENPA5     | -0.05061 |
| EXOC3L1    | -0.05067 |
| GSPT2      | -0.05067 |
| SULT1A2    | -0.05068 |
| MBD4       | -0.05069 |
| MTRF1L     | -0.05071 |
| MANBA      | -0.05075 |
| KLHL8      | -0.05075 |
| IFTAP      | -0.05076 |
| PSMG2      | -0.05081 |
| TUT4       | -0.05086 |
| GAS8       | -0.05088 |
| NDUFA3     | -0.05089 |
| COMMD8     | -0.05091 |
| TEFM       | -0.05093 |
| IQCA1      | -0.05095 |
| UBP1       | -0.05095 |
| SESTD1     | -0.05096 |
| CENPBD1P1  | -0.05097 |
| IFITM3     | -0.05097 |
| LIN54      | -0.05098 |
| ATG4B      | -0.051   |

|             |          |
|-------------|----------|
| MRPL23      | -0.05101 |
| AC008537.3  | -0.05104 |
| MICU2       | -0.05109 |
| GS1-124K5.4 | -0.05115 |
| PROB1       | -0.05116 |
| TRMO        | -0.05119 |
| MAGT1       | -0.0512  |
| BRD7        | -0.0513  |
| C17orf113   | -0.05136 |
| PARP1       | -0.05136 |
| MBNL2       | -0.05142 |
| SEC24A      | -0.05143 |
| BPHL        | -0.05147 |
| NSD1        | -0.05148 |
| AC140479.2  | -0.05148 |
| AL691432.2  | -0.05149 |
| ZNF597      | -0.0515  |
| TP53INP2    | -0.05151 |
| GTF2IRD2B   | -0.05151 |
| CSTF3       | -0.05153 |
| ZNF552      | -0.05155 |
| WDR89       | -0.05156 |
| CLCN7       | -0.05156 |
| RPS3A       | -0.05164 |
| NSUN5P2     | -0.05165 |
| GRHPR       | -0.05166 |
| AC025181.2  | -0.05166 |
| TIGD1       | -0.05169 |
| ANAPC5      | -0.05171 |
| TMEM204     | -0.0518  |
| PLSCR4      | -0.0518  |
| SEMA3A      | -0.05182 |
| ARMC1       | -0.05182 |
| TCEA1       | -0.05182 |
| KMT5C       | -0.05183 |
| TOX4        | -0.05187 |
| TDRKH-AS1   | -0.05188 |
| CDKL5       | -0.0519  |
| SYN1        | -0.0519  |
| MAP3K4      | -0.05192 |
| ATP6AP1     | -0.05197 |
| AC005332.6  | -0.05199 |
| BICRA       | -0.05199 |
| ITGB3BP     | -0.05201 |
| OS9         | -0.05204 |
| LINC00482   | -0.05206 |
| CYP4X1      | -0.05211 |
| UNK         | -0.05212 |
| ELOF1       | -0.05213 |



|            |          |
|------------|----------|
| RAB6B      | -0.05216 |
| RNF5P1     | -0.05222 |
| FLYWCH1    | -0.05229 |
| STEAP2     | -0.05233 |
| GALNT18    | -0.05233 |
| WWP2       | -0.05233 |
| AC244669.1 | -0.05238 |
| B3GLCT     | -0.05242 |
| FAR2       | -0.05243 |
| AP2A2      | -0.05244 |
| SLC38A5    | -0.05245 |
| NDUFAF4    | -0.05251 |
| KCTD6      | -0.05253 |
| DPM1       | -0.05258 |
| SEC63      | -0.05258 |
| GNB4       | -0.05259 |
| SGK2       | -0.05259 |
| MBD6       | -0.0526  |
| NUDT13     | -0.05261 |
| IFT122     | -0.05263 |
| VOPP1      | -0.05264 |
| CDK5RAP1   | -0.05265 |
| TBPL1      | -0.05265 |
| KLHL29     | -0.05268 |
| RNF115     | -0.05275 |
| CHST12     | -0.05275 |
| LINC01011  | -0.05281 |
| SRSF12     | -0.05285 |
| TOMM40L    | -0.05286 |
| SLC25A5    | -0.05287 |
| MED28      | -0.053   |
| METTL1     | -0.05304 |
| AP4E1      | -0.05306 |
| IBA57      | -0.05306 |
| ALG11      | -0.0531  |
| ATP13A1    | -0.05313 |
| DTNB       | -0.05313 |
| KLHL22     | -0.05314 |
| MFSD6      | -0.05314 |
| PLD1       | -0.0532  |
| EID2       | -0.05322 |
| UBA3       | -0.05325 |
| LINC00294  | -0.05325 |
| ANKRD13C   | -0.05329 |
| CCNH       | -0.05332 |
| AL008733.1 | -0.05334 |
| DMPK       | -0.05336 |
| MOAP1      | -0.05339 |
| CEP41      | -0.05341 |

|            |          |
|------------|----------|
| PLAA       | -0.05343 |
| DAPK2      | -0.05345 |
| KCTD18     | -0.05346 |
| SGPL1      | -0.05348 |
| CYP4B1     | -0.05351 |
| TP1P2      | -0.05357 |
| ZNF569     | -0.0536  |
| FBXL19-AS1 | -0.0536  |
| SNHG28     | -0.05361 |
| TBC1D1     | -0.05366 |
| GJB1       | -0.05369 |
| C4orf46    | -0.05371 |
| ZNF772     | -0.05371 |
| CCNB1IP1   | -0.05373 |
| FCSK       | -0.0538  |
| DERL1      | -0.05382 |
| PIGBOS1    | -0.05386 |
| TDP1       | -0.0539  |
| ZNF703     | -0.05391 |
| MAGIX      | -0.05392 |
| PPP6R3     | -0.05396 |
| KIN        | -0.05398 |
| TDRD7      | -0.05399 |
| POC1B      | -0.05403 |
| MT-ATP8    | -0.05404 |
| SUDS3      | -0.05409 |
| ESCO1      | -0.05409 |
| RBM45      | -0.0541  |
| GALK2      | -0.05414 |
| DPP8       | -0.05416 |
| DCTN3      | -0.05416 |
| PKD1       | -0.05418 |
| AC024560.2 | -0.05421 |
| SNX3       | -0.05424 |
| EGLN2      | -0.05427 |
| FGF7P3     | -0.05431 |
| BOD1L1     | -0.05432 |
| NUP43      | -0.05433 |
| IFIT5      | -0.05434 |
| HEMK1      | -0.05439 |
| ZNF616     | -0.05441 |
| COPS5      | -0.05446 |
| FAM228B    | -0.05446 |
| EXOSC8     | -0.05451 |
| APOBEC2    | -0.05452 |
| VWA5A      | -0.05454 |
| ZSCAN32    | -0.05454 |
| LEPR       | -0.05454 |
| WEE1       | -0.05457 |

|            |          |
|------------|----------|
| GMPR       | -0.05458 |
| MOSMO      | -0.05459 |
| ZNF416     | -0.05461 |
| PRPF40B    | -0.05466 |
| AC046134.2 | -0.0547  |
| FOXJ3      | -0.0547  |
| MIPEP      | -0.05471 |
| SNX1       | -0.05474 |
| LRRFIP2    | -0.05474 |
| AC009506.1 | -0.05474 |
| FBXO9      | -0.05477 |
| KIF16B     | -0.05477 |
| SWT1       | -0.05478 |
| OLFML3     | -0.05478 |
| LIN7C      | -0.05483 |
| E4F1       | -0.05484 |
| LNX2       | -0.05484 |
| UNC50      | -0.05488 |
| EIF2S3     | -0.05488 |
| NRF1       | -0.05497 |
| MTPAP      | -0.05497 |
| ALDH2      | -0.055   |
| ZNF69      | -0.055   |
| GCFC2      | -0.055   |
| WTAP       | -0.05503 |
| ECSCR      | -0.05506 |
| PLEKHA3    | -0.05507 |
| INTS4      | -0.05508 |
| ST7L       | -0.05518 |
| CHD2       | -0.05518 |
| BMF        | -0.05521 |
| XPNPEP3    | -0.05521 |
| SRSF6      | -0.05522 |
| PELI1      | -0.05522 |
| AL023807.1 | -0.05525 |
| ATP5F1A    | -0.05526 |
| ARHGAP22   | -0.05527 |
| PTPMT1     | -0.05528 |
| MN1        | -0.05533 |
| AC002310.1 | -0.05546 |
| RPL22P2    | -0.05548 |
| GON4L      | -0.05549 |
| SLC35B1    | -0.0555  |
| CEP170     | -0.05552 |
| TXLNG      | -0.05552 |
| PROSER3    | -0.05552 |
| SPAG16     | -0.05553 |
| PACRGL     | -0.05555 |
| SLC22A18AS | -0.05555 |

|            |          |
|------------|----------|
| TMF1       | -0.05559 |
| AC125257.1 | -0.05559 |
| PRPF18     | -0.05562 |
| TRMT2B     | -0.05563 |
| ATG2A      | -0.05567 |
| SH3BGR     | -0.05569 |
| YOD1       | -0.05569 |
| IKZF5      | -0.0557  |
| LINC00869  | -0.05571 |
| SERP1      | -0.05572 |
| WASHC1     | -0.05573 |
| CABIN1     | -0.05577 |
| COA1       | -0.05578 |
| CDK19      | -0.05584 |
| AC115618.2 | -0.05588 |
| SMC5       | -0.05595 |
| OGA        | -0.05596 |
| TMPO       | -0.05597 |
| GFOD1      | -0.05598 |
| USP3       | -0.05599 |
| FLCN       | -0.056   |
| AL590705.3 | -0.05604 |
| ARRB1      | -0.05605 |
| RAB11FIP3  | -0.05607 |
| DBNDD2     | -0.05607 |
| RIOX1      | -0.05608 |
| SHB        | -0.05608 |
| MAN2A1     | -0.05609 |
| AHR        | -0.0561  |
| POMT1      | -0.05612 |
| DDI2       | -0.05615 |
| AC254562.3 | -0.0562  |
| TPPP       | -0.0562  |
| POLA2      | -0.05621 |
| GAK        | -0.05622 |
| USP53      | -0.05623 |
| MT-TT      | -0.05626 |
| MED12      | -0.05627 |
| XKR9       | -0.05633 |
| TET3       | -0.05636 |
| FAM3A      | -0.05637 |
| ZCCHC14    | -0.05638 |
| WDR86-AS1  | -0.05641 |
| SDHAF4     | -0.05645 |
| RPS27A     | -0.05646 |
| HSPA14     | -0.05649 |
| GANC       | -0.05651 |
| AIP        | -0.05652 |
| NPRL2      | -0.05654 |

|            |          |
|------------|----------|
| CDK1       | -0.05654 |
| HOMER1     | -0.05657 |
| MED16      | -0.05661 |
| ST6GALNAC1 | -0.05664 |
| PTCH1      | -0.05665 |
| ZNRF2      | -0.05667 |
| RPL17      | -0.05675 |
| USP24      | -0.05678 |
| ZNF646     | -0.0568  |
| SELENOH    | -0.05681 |
| CXXC1      | -0.05688 |
| THBS3      | -0.05689 |
| INO80C     | -0.0569  |
| QSER1      | -0.05693 |
| DAZAP1     | -0.05693 |
| MARCHF2    | -0.05694 |
| PARM1      | -0.05695 |
| FBXW2      | -0.05696 |
| TBC1D7     | -0.05697 |
| TMEM107    | -0.05702 |
| TOP2B      | -0.05706 |
| RBSN       | -0.05707 |
| NLK        | -0.05707 |
| PDE10A     | -0.05722 |
| HIVEP2     | -0.05725 |
| CLDND1     | -0.05728 |
| LSM6       | -0.0573  |
| CTSF       | -0.0573  |
| RHOT2      | -0.05732 |
| HMGB1P1    | -0.05732 |
| CCDC174    | -0.05739 |
| NRSN2-AS1  | -0.05743 |
| COL23A1    | -0.05745 |
| GRK4       | -0.05747 |
| SDCCAG8    | -0.05748 |
| ZDHHC6     | -0.05749 |
| TMEM159    | -0.0575  |
| SIDT2      | -0.05751 |
| RGS16      | -0.05763 |
| EGR1       | -0.05764 |
| AL589843.1 | -0.05764 |
| SNX5       | -0.05764 |
| PTGR2      | -0.05769 |
| MT-ND3     | -0.05769 |
| RNF19B     | -0.05769 |
| YLPM1      | -0.0577  |
| C19orf25   | -0.05771 |
| ZNF451     | -0.05772 |
| NDUFA9     | -0.05772 |

|            |          |
|------------|----------|
| CCNT2-AS1  | -0.05775 |
| SLC25A40   | -0.05775 |
| UPF3A      | -0.05776 |
| FKRP       | -0.05777 |
| CWC25      | -0.05785 |
| PATL1      | -0.05785 |
| ASH1L      | -0.05788 |
| CTDP1      | -0.05793 |
| ZNF570     | -0.05796 |
| C16orf87   | -0.05796 |
| EOLA2      | -0.05803 |
| ARHGEF37   | -0.05803 |
| LSR        | -0.05809 |
| DHRS4-AS1  | -0.05809 |
| RPRD1B     | -0.05811 |
| PLPP3      | -0.05811 |
| ALDH16A1   | -0.05811 |
| GSTO1      | -0.05811 |
| HSD11B2    | -0.05812 |
| AL645933.2 | -0.05817 |
| LRP1       | -0.05825 |
| DMAP1      | -0.05833 |
| DNAJC13    | -0.05836 |
| FANCD2     | -0.05839 |
| TEDC1      | -0.05842 |
| PREB       | -0.05845 |
| PACC1      | -0.05847 |
| TMEM185A   | -0.0585  |
| NFKB2      | -0.05853 |
| VAMP2      | -0.05854 |
| TDG        | -0.05856 |
| TAB1       | -0.05856 |
| TAF3       | -0.05856 |
| ZNF565     | -0.05861 |
| FAM91A1    | -0.05861 |
| PAGR1      | -0.05861 |
| CLK3       | -0.05868 |
| AC109583.1 | -0.05869 |
| PAPOLA     | -0.0587  |
| AC004967.1 | -0.05871 |
| IL1B       | -0.05873 |
| ZFP92      | -0.05874 |
| API5       | -0.05877 |
| ANO7L1     | -0.05877 |
| AC068792.1 | -0.05881 |
| C8orf76    | -0.05882 |
| RP9P       | -0.05885 |
| TMED10     | -0.05886 |
| FAM217B    | -0.05887 |

|              |          |
|--------------|----------|
| PDPK1        | -0.05887 |
| NEBL-AS1     | -0.05889 |
| MAPKAPK5-AS1 | -0.05891 |
| AC083964.1   | -0.05895 |
| LRRC8D       | -0.05899 |
| PIGX         | -0.059   |
| MAGI3        | -0.05901 |
| GIN1         | -0.05901 |
| EXOSC9       | -0.05905 |
| TOMM22       | -0.05907 |
| CNTN1        | -0.05908 |
| PTGES3P1     | -0.05909 |
| TBC1D10A     | -0.05909 |
| TNFRSF18     | -0.0591  |
| KDM5A        | -0.05913 |
| CLK2         | -0.05914 |
| PRR14L       | -0.05916 |
| RAB42        | -0.05921 |
| CRYZL1       | -0.05927 |
| ZNF446       | -0.05927 |
| PSMD13       | -0.05928 |
| AL121753.2   | -0.05934 |
| ZNF621       | -0.05941 |
| REPIN1       | -0.05947 |
| SRSF10       | -0.0595  |
| ZNF653       | -0.05951 |
| AARSD1       | -0.05951 |
| RBMX         | -0.05952 |
| ATP5F1C      | -0.05953 |
| PRMT7        | -0.05953 |
| COX17        | -0.05957 |
| TMEM86B      | -0.05958 |
| AKIRIN2      | -0.05962 |
| GZF1         | -0.05962 |
| STARD7       | -0.05964 |
| CERS6        | -0.05965 |
| GRINA        | -0.05966 |
| KLF13        | -0.05969 |
| ATG3         | -0.05978 |
| FITM2        | -0.05978 |
| WNT2         | -0.0598  |
| AC098592.1   | -0.05984 |
| AC005261.3   | -0.05986 |
| ZNF879       | -0.05988 |
| C11orf96     | -0.05988 |
| PAPOLG       | -0.05991 |
| LINC02449    | -0.05992 |
| SNED1        | -0.05992 |
| UQCR11       | -0.05994 |

|            |          |
|------------|----------|
| CCDC142    | -0.05998 |
| TMEM259    | -0.05998 |
| DCAF13     | -0.06002 |
| ANAPC10    | -0.06003 |
| NR6A1      | -0.06003 |
| ZBTB33     | -0.06007 |
| SERAC1     | -0.06008 |
| ZNF346     | -0.06009 |
| SEC61B     | -0.06011 |
| NPDC1      | -0.06014 |
| PCMTD2     | -0.06019 |
| MIGA2      | -0.06019 |
| CCDC59     | -0.06026 |
| RSBN1L     | -0.06032 |
| IGFBP7     | -0.06034 |
| REXO5      | -0.06036 |
| DHFR2      | -0.06037 |
| NARS2      | -0.06037 |
| TRMT11     | -0.06038 |
| FBXL20     | -0.0604  |
| HIPK2      | -0.06041 |
| RP2        | -0.06043 |
| C3orf38    | -0.06044 |
| RBM43      | -0.06044 |
| ADGRA2     | -0.06045 |
| SCGB2A1    | -0.0605  |
| AL512408.1 | -0.06052 |
| PPP1R15A   | -0.06059 |
| CIR1       | -0.06064 |
| UBA5       | -0.06066 |
| TMEM30A    | -0.06067 |
| CDKAL1     | -0.06068 |
| OPHN1      | -0.06069 |
| SMU1       | -0.06069 |
| SREBF2-AS1 | -0.06069 |
| CCDC22     | -0.06073 |
| AGAP1      | -0.06077 |
| BEX2       | -0.06077 |
| FXD5       | -0.0608  |
| PHF1       | -0.0608  |
| AC083799.1 | -0.06082 |
| HSPH1      | -0.06082 |
| PSMB3      | -0.06091 |
| AC022784.5 | -0.06091 |
| GOLGA2P10  | -0.06092 |
| MAPKBP1    | -0.06094 |
| RPARP-AS1  | -0.06095 |
| LPIN3      | -0.06095 |
| THUMP1     | -0.06096 |



|            |          |
|------------|----------|
| PISD       | -0.06096 |
| HCG11      | -0.06099 |
| CRTC1      | -0.06101 |
| CIAO2B     | -0.06105 |
| CDADC1     | -0.06106 |
| AC241585.1 | -0.0611  |
| WWP1       | -0.06111 |
| PNPLA6     | -0.06111 |
| KITLG      | -0.06111 |
| BEND7      | -0.06116 |
| ANAPC7     | -0.06117 |
| AL355001.2 | -0.06118 |
| FAM241A    | -0.06119 |
| APPL1      | -0.06123 |
| PLB1       | -0.06128 |
| OTUD6B-AS1 | -0.06129 |
| LINC00899  | -0.0613  |
| SLC22A23   | -0.06132 |
| KCNK15     | -0.06132 |
| TBC1D15    | -0.06141 |
| ZNF445     | -0.06142 |
| YAE1       | -0.06143 |
| FAAP24     | -0.06144 |
| TRIM23     | -0.0615  |
| CREB1      | -0.06153 |
| LINC01273  | -0.06159 |
| WDR73      | -0.06161 |
| USP49      | -0.06167 |
| GPR157     | -0.06167 |
| NMI        | -0.06167 |
| AC008875.1 | -0.0617  |
| PTPN13     | -0.06174 |
| CNTLN      | -0.06175 |
| PPP6R2     | -0.06177 |
| LSM7       | -0.06177 |
| AC100810.1 | -0.06178 |
| ELF3-AS1   | -0.06178 |
| UIMC1      | -0.06179 |
| GRTP1      | -0.06185 |
| STRADB     | -0.06189 |
| ASB9       | -0.06189 |
| LRIG3      | -0.0619  |
| LRCH3      | -0.06194 |
| ACKR4      | -0.06196 |
| UNKL       | -0.06197 |
| SPEN       | -0.06197 |
| ZNF485     | -0.06197 |
| OMA1       | -0.06203 |
| GPR89B     | -0.06204 |

|            |          |
|------------|----------|
| GMPR2      | -0.06207 |
| SNHG11     | -0.0621  |
| ORMDL3     | -0.06213 |
| TAF6L      | -0.06214 |
| EIF3K      | -0.06222 |
| INSIG1-DT  | -0.06229 |
| ZNF347     | -0.0623  |
| AC093157.1 | -0.0623  |
| POC5       | -0.06234 |
| KMT2D      | -0.06237 |
| AL356740.1 | -0.06237 |
| MRPL21     | -0.06238 |
| ZNF684     | -0.06244 |
| SEMA6A     | -0.06249 |
| DMD        | -0.06249 |
| UBXN2B     | -0.06251 |
| SMAP1      | -0.06254 |
| PINX1      | -0.06261 |
| C1orf112   | -0.06264 |
| TRIM13     | -0.06265 |
| AC006237.1 | -0.06269 |
| YIF1B      | -0.06272 |
| AMT        | -0.06274 |
| CTSK       | -0.06274 |
| ZNF816     | -0.06275 |
| DDHD2      | -0.06283 |
| ZNF138     | -0.06286 |
| ZRANB2     | -0.06287 |
| CEP112     | -0.06289 |
| RNF114     | -0.06289 |
| CASD1      | -0.06291 |
| PTCD3      | -0.06299 |
| RPL10P6    | -0.06299 |
| PAXX       | -0.063   |
| XIAP       | -0.06301 |
| DNPEP      | -0.06303 |
| SELENOM    | -0.0631  |
| SBF2-AS1   | -0.0631  |
| PACERR     | -0.06311 |
| ASF1A      | -0.06313 |
| KCTD9      | -0.06314 |
| BICD2      | -0.06324 |
| FBXO3      | -0.06325 |
| ZNF497     | -0.06332 |
| ERG        | -0.06336 |
| DSCC1      | -0.06349 |
| DNAJC3     | -0.06354 |
| NEK7       | -0.06355 |
| ZNF511     | -0.06355 |

|            |          |
|------------|----------|
| FAM50A     | -0.06358 |
| BTC        | -0.06358 |
| EMC1-AS1   | -0.06359 |
| DLG4       | -0.06364 |
| APC        | -0.06364 |
| ATP2C1     | -0.06372 |
| COQ8B      | -0.06374 |
| C2orf49    | -0.06374 |
| NADSYN1    | -0.06376 |
| PCED1B     | -0.0638  |
| RANBP2     | -0.06383 |
| CD164      | -0.06387 |
| MCEE       | -0.06389 |
| MBNL1      | -0.06391 |
| ASAH1      | -0.06398 |
| EBAG9      | -0.064   |
| AC011476.3 | -0.06403 |
| TMLHE      | -0.06404 |
| CALM2      | -0.06404 |
| AP001160.3 | -0.06404 |
| FAM98C     | -0.06404 |
| ZXDB       | -0.06405 |
| USP48      | -0.06409 |
| IL32       | -0.06409 |
| MT-RNR2    | -0.06411 |
| ZNF471     | -0.06411 |
| KLHL5      | -0.06411 |
| ING3       | -0.06416 |
| CCNP       | -0.06417 |
| ALKBH2     | -0.06419 |
| ZMYM2      | -0.0642  |
| PRKAR2B    | -0.06423 |
| NDUFAF7    | -0.06424 |
| DYRK1B     | -0.06425 |
| TAS2R5     | -0.06427 |
| DOCK6      | -0.06427 |
| MBD1       | -0.06428 |
| SERPINB9P1 | -0.06429 |
| SV2A       | -0.06429 |
| TASOR      | -0.06431 |
| ASXL1      | -0.06433 |
| NOTCH1     | -0.06433 |
| MED26      | -0.06433 |
| ATP6V0A1   | -0.06434 |
| ENOPH1     | -0.06438 |
| PEBP1      | -0.06441 |
| NUDT9      | -0.06443 |
| MORN1      | -0.06444 |
| FMC1       | -0.06444 |

|            |          |
|------------|----------|
| ZNF461     | -0.06447 |
| ZNF462     | -0.06449 |
| STAT3      | -0.06452 |
| ZNF280C    | -0.06454 |
| ZNF324     | -0.06457 |
| SRSF7      | -0.06457 |
| OTUD6B     | -0.06457 |
| COL4A4     | -0.06461 |
| H3-3A      | -0.06469 |
| AC068533.2 | -0.06472 |
| PPP2R5C    | -0.06474 |
| ESPN       | -0.06475 |
| ATG4D      | -0.06476 |
| FGFR1OP2   | -0.06477 |
| KBTBD3     | -0.06483 |
| INO80E     | -0.0649  |
| THRB       | -0.06496 |
| TRABD      | -0.06497 |
| NOP53      | -0.06501 |
| RNFT1      | -0.06504 |
| MAPK1IP1L  | -0.06505 |
| RSL24D1    | -0.06508 |
| FAM219A    | -0.06508 |
| ATP8A1     | -0.06517 |
| MTATP6P1   | -0.06519 |
| DHRS7      | -0.06522 |
| PRKACA     | -0.06525 |
| ARHGAP27   | -0.06533 |
| WDR59      | -0.06535 |
| RAPGEF3    | -0.06543 |
| USP18      | -0.06545 |
| RNF34      | -0.06549 |
| MRPS14     | -0.06549 |
| NCK1-DT    | -0.06549 |
| AC008669.1 | -0.06551 |
| CAMKMT     | -0.06557 |
| ACOT2      | -0.06561 |
| CILK1      | -0.06563 |
| PLEKHM3    | -0.06565 |
| ZDHHC24    | -0.06565 |
| SETD5      | -0.06566 |
| POLA1      | -0.06567 |
| SLC66A2    | -0.06568 |
| TTC9C      | -0.06572 |
| SLC7A6OS   | -0.06577 |
| IRF2BPL    | -0.06578 |
| SMG9       | -0.06581 |
| POLR2G     | -0.06586 |
| STXBP1     | -0.06587 |

|            |          |
|------------|----------|
| UBE2G2     | -0.0659  |
| LINC00674  | -0.0659  |
| RIC8B      | -0.06591 |
| AC005332.3 | -0.066   |
| JADE2      | -0.06603 |
| ZNF547     | -0.06604 |
| AP006623.1 | -0.06604 |
| AL121906.2 | -0.06609 |
| ECM2       | -0.06611 |
| UBR7       | -0.06614 |
| SH3GLB2    | -0.06618 |
| CEP164     | -0.06619 |
| UNC119     | -0.06626 |
| AC080013.3 | -0.06626 |
| PTPN3      | -0.06629 |
| UPRT       | -0.06639 |
| USP16      | -0.0664  |
| WDR20      | -0.06642 |
| TPP2       | -0.06645 |
| ZNF701     | -0.06648 |
| VPS4B      | -0.0665  |
| CAPRIN2    | -0.06651 |
| NPHP4      | -0.06653 |
| BAMBI      | -0.06654 |
| PIAS1      | -0.06656 |
| EWSR1      | -0.06656 |
| C6orf141   | -0.06658 |
| LRRC29     | -0.06658 |
| ZNF747     | -0.06665 |
| RABEP1     | -0.06666 |
| FOXO4      | -0.06666 |
| RMDN1      | -0.06669 |
| ST6GALNAC4 | -0.06673 |
| ZNF554     | -0.06679 |
| WASL-DT    | -0.0668  |
| MAP4K2     | -0.0668  |
| SNORD100   | -0.06682 |
| ZC3H12C    | -0.06683 |
| ZNF641     | -0.06683 |
| FOXF2      | -0.06686 |
| RHOXF1-AS1 | -0.06687 |
| RBM17      | -0.06694 |
| SLC10A7    | -0.06697 |
| C18orf32   | -0.06698 |
| PARP2      | -0.06701 |
| GEMIN7     | -0.06718 |
| KMT2E      | -0.06719 |
| CNIH2      | -0.06719 |
| IL10RB     | -0.0672  |

|            |          |
|------------|----------|
| RCOR3      | -0.0672  |
| MAP3K10    | -0.06722 |
| SNX16      | -0.06722 |
| EXOC8      | -0.06722 |
| LRRC14     | -0.06723 |
| MED6       | -0.06726 |
| USP12      | -0.06729 |
| AC007342.8 | -0.06729 |
| CCDC93     | -0.06729 |
| AL589843.2 | -0.06731 |
| VPS16      | -0.06732 |
| IGIP       | -0.06732 |
| NDUFS7     | -0.06736 |
| GALNT10    | -0.06737 |
| CMTR2      | -0.0674  |
| SETD3      | -0.06742 |
| ZNF627     | -0.06744 |
| SNRPGP2    | -0.06748 |
| BNIP2      | -0.0675  |
| FBXO25     | -0.06758 |
| POLR3F     | -0.06758 |
| INIP       | -0.06759 |
| DYNC2LI1   | -0.06766 |
| AP001029.1 | -0.06771 |
| C17orf80   | -0.06771 |
| IRX2       | -0.06774 |
| ZADH2      | -0.06778 |
| HLA-F-AS1  | -0.0678  |
| XPO6       | -0.0678  |
| TADA2A     | -0.0678  |
| ZNF638     | -0.06781 |
| PSD3       | -0.06786 |
| DPY19L3    | -0.06787 |
| GABPB1     | -0.06787 |
| ZBTB34     | -0.06789 |
| SGCE       | -0.06791 |
| TPP1       | -0.06792 |
| TP63       | -0.06795 |
| NANP       | -0.06798 |
| CRYL1      | -0.06801 |
| ABCD3      | -0.06805 |
| DGKZ       | -0.06805 |
| NIPAL3     | -0.06806 |
| STK11      | -0.06809 |
| EOGT       | -0.06814 |
| CYCSP10    | -0.06817 |
| GLRX3      | -0.06817 |
| FAM122B    | -0.06817 |
| ANKRD28    | -0.06818 |

|            |          |
|------------|----------|
| MRPL50     | -0.0682  |
| ZNF525     | -0.06821 |
| MKNK1      | -0.06821 |
| HAUS5      | -0.06822 |
| MKLN1      | -0.06825 |
| MIR6797    | -0.06827 |
| FAM117B    | -0.06828 |
| PODN       | -0.06833 |
| ZNF428     | -0.06839 |
| WHAMM      | -0.0684  |
| WDTC1      | -0.06842 |
| BCLAF1     | -0.06843 |
| SGPP2      | -0.06843 |
| SPRY1      | -0.06848 |
| POLR2J4    | -0.0685  |
| TOR2A      | -0.06853 |
| SYNM       | -0.06853 |
| THOC2      | -0.06854 |
| CUTC       | -0.06859 |
| DOC2A      | -0.06861 |
| AC064807.4 | -0.06864 |
| C14orf93   | -0.06869 |
| RGL3       | -0.06869 |
| TSPYL4     | -0.0687  |
| PANK2      | -0.06872 |
| INTS2      | -0.06874 |
| TMEM131    | -0.06874 |
| GRIPAP1    | -0.06876 |
| HNRNPCP7   | -0.06879 |
| AL117336.2 | -0.0688  |
| GALNT1     | -0.06883 |
| ZKSCAN2    | -0.06887 |
| PHF6       | -0.06888 |
| B3GALNT2   | -0.06891 |
| LINC01569  | -0.06892 |
| VPS36      | -0.069   |
| SNX13      | -0.06901 |
| SLC2A11    | -0.06901 |
| NHLRC2     | -0.06902 |
| ISLR       | -0.06904 |
| MAT2A      | -0.06905 |
| AL355353.1 | -0.06905 |
| LIN52      | -0.06906 |
| MYL5       | -0.06911 |
| ZNF836     | -0.06913 |
| ZNF180     | -0.06913 |
| TRMT1      | -0.06915 |
| CCL11      | -0.06921 |
| PPP4R1-AS1 | -0.06925 |

|            |          |
|------------|----------|
| BIN1       | -0.0693  |
| Z95115.1   | -0.06932 |
| NFKBIB     | -0.06934 |
| DIP2A      | -0.06937 |
| RASEF      | -0.06941 |
| CLCC1      | -0.06947 |
| USP35      | -0.06947 |
| PAIP2      | -0.06949 |
| LHFPL3-AS2 | -0.06952 |
| FAM160B2   | -0.06954 |
| SLC9A3R1   | -0.06959 |
| SMIM3      | -0.06961 |
| DNAJC1     | -0.06967 |
| HSD17B7    | -0.06969 |
| OGFR       | -0.06971 |
| TNKS       | -0.06975 |
| STAG2      | -0.06978 |
| RBM34      | -0.06979 |
| RBFA       | -0.06981 |
| ZFP28      | -0.06982 |
| TCP11L1    | -0.06982 |
| EDEM1      | -0.06984 |
| SERINC5    | -0.06986 |
| AC026436.1 | -0.0699  |
| TATDN3     | -0.06991 |
| CASP4      | -0.06994 |
| CUL9       | -0.06995 |
| PHYHD1     | -0.07005 |
| KLHL25     | -0.07005 |
| HUNK       | -0.07007 |
| LCOR       | -0.07011 |
| EVI5       | -0.07018 |
| LINC00526  | -0.07021 |
| TPM3P6     | -0.07022 |
| TTC30B     | -0.07023 |
| FRAT2      | -0.07023 |
| PRKCD      | -0.07024 |
| ARL5B      | -0.07025 |
| MTR        | -0.0703  |
| COMMD5     | -0.07033 |
| AP001528.1 | -0.07034 |
| TMEM199    | -0.07034 |
| AL035413.1 | -0.07037 |
| TPT1-AS1   | -0.07038 |
| PIGCP1     | -0.07039 |
| MIR6739    | -0.0704  |
| AC008481.1 | -0.07042 |
| ZGPAT      | -0.07043 |
| NCOA1      | -0.07044 |



|             |          |
|-------------|----------|
| COQ6        | -0.07048 |
| PPP2R5E     | -0.07048 |
| IFT52       | -0.0705  |
| CP          | -0.07055 |
| CCNA1       | -0.07056 |
| AC116036.2  | -0.07057 |
| PPM1B       | -0.07062 |
| ZBTB3       | -0.07062 |
| PLEKHG1     | -0.07063 |
| ZNFX1       | -0.07064 |
| HORMAD2-AS1 | -0.07064 |
| EPHB1       | -0.07065 |
| ARL10       | -0.07067 |
| TP53RK      | -0.0707  |
| ACMSD       | -0.07071 |
| FAM3B       | -0.07077 |
| FBXO7       | -0.07085 |
| HIVEP1      | -0.07088 |
| TGFBR3      | -0.07088 |
| ROS1        | -0.07089 |
| HASPIN      | -0.07095 |
| MTLN        | -0.07096 |
| TIMM23B     | -0.07096 |
| ZBTB6       | -0.07102 |
| CCAR2       | -0.07103 |
| AC132938.3  | -0.07105 |
| ELMOD3      | -0.07107 |
| TP53I13     | -0.07108 |
| HMGN2P3     | -0.07112 |
| NAP1L5      | -0.07113 |
| P2RX4       | -0.07113 |
| NEIL1       | -0.07115 |
| ERLEC1      | -0.0712  |
| DUSP22      | -0.07124 |
| SPINK13     | -0.07125 |
| PURA        | -0.07126 |
| KHDC1       | -0.07126 |
| SNORD60     | -0.07128 |
| SLC25A30    | -0.07133 |
| RNU6-510P   | -0.07138 |
| AC018638.1  | -0.07139 |
| HMGB1P31    | -0.07139 |
| CPNE7       | -0.07143 |
| AC005696.1  | -0.07146 |
| ZNF326      | -0.07147 |
| ATF2        | -0.0715  |
| RNF6        | -0.07153 |
| AC093484.4  | -0.07155 |
| HINT2       | -0.07155 |

|            |          |
|------------|----------|
| UQCRBP1    | -0.07157 |
| SAV1       | -0.07161 |
| STAG3L5P   | -0.07161 |
| MFSD13A    | -0.07161 |
| ITM2B      | -0.07162 |
| MTHFR      | -0.07163 |
| EYA3       | -0.07163 |
| TMEM50B    | -0.07164 |
| MTND2P28   | -0.07165 |
| USP46-DT   | -0.07169 |
| ZMYND11    | -0.07171 |
| ITGA7      | -0.07172 |
| PAXIP1-AS2 | -0.07174 |
| AC006978.1 | -0.07177 |
| AL354696.1 | -0.07177 |
| SGMS2      | -0.07188 |
| DENND6A    | -0.07193 |
| SCAND1     | -0.07198 |
| BTN2A1     | -0.07204 |
| ZNF561     | -0.07204 |
| RSRC2      | -0.07205 |
| DIDO1      | -0.07206 |
| ATL1       | -0.07209 |
| CDC40      | -0.07209 |
| CACNB1     | -0.07209 |
| AC006001.4 | -0.0721  |
| COX6B1     | -0.07211 |
| HAUS4      | -0.07216 |
| RANBP3     | -0.07216 |
| ENGASE     | -0.07219 |
| ATP10D     | -0.07221 |
| ZRANB3     | -0.07223 |
| GMPPB      | -0.0723  |
| NTAN1      | -0.0723  |
| ZNF92      | -0.0723  |
| AC100803.3 | -0.07243 |
| SORBS3     | -0.0725  |
| CHST6      | -0.07257 |
| ZNF689     | -0.07257 |
| KCNN2      | -0.07258 |
| OXR1       | -0.07263 |
| BRWD3      | -0.07266 |
| LAMB2P1    | -0.07266 |
| SACM1L     | -0.07269 |
| SLF2       | -0.07269 |
| FBLN7      | -0.07271 |
| RNU6-88P   | -0.07272 |
| AC068338.3 | -0.07274 |
| TXNL1      | -0.07275 |

|            |          |
|------------|----------|
| AC093010.2 | -0.07276 |
| ESCO2      | -0.07279 |
| CHDH       | -0.07283 |
| SYTL1      | -0.07283 |
| CDC14B     | -0.07285 |
| XRCC3      | -0.07285 |
| AC020663.2 | -0.07291 |
| NRIP1      | -0.07298 |
| NRBF2P6    | -0.07301 |
| RSAD1      | -0.07302 |
| C2orf15    | -0.07303 |
| MITF       | -0.07305 |
| CASZ1      | -0.07306 |
| UBE2N      | -0.07306 |
| ZNF800     | -0.0731  |
| ABHD10     | -0.07312 |
| DUOXA1     | -0.07312 |
| HEXB       | -0.07315 |
| C18orf25   | -0.07315 |
| FRMD4B     | -0.07323 |
| NPEPL1     | -0.07325 |
| DTNA       | -0.07325 |
| HACE1      | -0.07325 |
| ZNF587     | -0.07333 |
| CKLF       | -0.07341 |
| RPGRIP1L   | -0.07341 |
| AL031775.1 | -0.07341 |
| CCNC       | -0.07342 |
| MAU2       | -0.07348 |
| CMTM7      | -0.07348 |
| LRRK2-DT   | -0.07353 |
| TRIM62     | -0.07353 |
| NNT-AS1    | -0.07361 |
| TNFSF4     | -0.07361 |
| ZNF304     | -0.07363 |
| CMC2       | -0.0737  |
| DDX24      | -0.07377 |
| PPP1R14C   | -0.0738  |
| TNFSF14    | -0.07381 |
| TNPO2      | -0.07382 |
| SYCE2      | -0.07387 |
| TCHP       | -0.07389 |
| AC121761.1 | -0.07393 |
| IDI1       | -0.07393 |
| LINC01560  | -0.07396 |
| HOOK1      | -0.07399 |
| TASP1      | -0.07411 |
| ZNF568     | -0.07413 |
| GPBP1      | -0.07414 |

|             |          |
|-------------|----------|
| AC245884.12 | -0.07417 |
| CHD8        | -0.07419 |
| MLF1        | -0.07422 |
| PCBD2       | -0.07424 |
| USP31       | -0.07427 |
| ARIH2       | -0.07428 |
| OXA1L       | -0.07429 |
| AL354872.1  | -0.07431 |
| AC115618.1  | -0.07433 |
| SPRED1      | -0.07436 |
| B3GNT6      | -0.07437 |
| AP001189.3  | -0.0744  |
| AP000902.1  | -0.07441 |
| MYH11       | -0.07441 |
| CDV3        | -0.07446 |
| TAF9P3      | -0.07446 |
| NFKBIE      | -0.07451 |
| PDS5B       | -0.07453 |
| ZNF106      | -0.07454 |
| VPS54       | -0.07454 |
| ZNF606      | -0.07455 |
| AIFM1       | -0.07457 |
| RPL39P36    | -0.0746  |
| SBF1        | -0.07467 |
| MT-ATP6     | -0.07477 |
| MIR93       | -0.07478 |
| SNRPG       | -0.07479 |
| USF1        | -0.07483 |
| PPP1R2      | -0.07484 |
| COBLL1      | -0.07485 |
| PANK2-AS1   | -0.07492 |
| MORC3       | -0.07494 |
| COMMD1      | -0.07496 |
| ECHDC2      | -0.07498 |
| ACTR3       | -0.075   |
| ZNF18       | -0.075   |
| EEF1AKMT2   | -0.07503 |
| GGT7        | -0.07504 |
| CCS         | -0.07511 |
| SEPTIN9-DT  | -0.07511 |
| TCAP        | -0.07514 |
| RAMP2       | -0.07517 |
| C16orf46    | -0.0752  |
| AC015813.6  | -0.07522 |
| ZNF7        | -0.07524 |
| SPG11       | -0.07529 |
| SVIP        | -0.07533 |
| ADARB1      | -0.07536 |
| H2AZ2P1     | -0.07536 |

|                        |          |
|------------------------|----------|
| TMEM19                 | -0.07539 |
| PHKG1                  | -0.07543 |
| CDPF1P1                | -0.07547 |
| AC027117.2             | -0.07551 |
| ALAS1                  | -0.07556 |
| NBEAL2                 | -0.07559 |
| XYLB                   | -0.07559 |
| STAG3L5P-PVRIG2P-PILRB | -0.07562 |
| HPS4                   | -0.07565 |
| ARID1B                 | -0.07565 |
| RIMS3                  | -0.07568 |
| ZNF8                   | -0.07569 |
| ZNF443                 | -0.07569 |
| MID2                   | -0.07576 |
| SNHG25                 | -0.07578 |
| AC002310.5             | -0.0758  |
| RALGAPB                | -0.07583 |
| NICN1                  | -0.07583 |
| NUMB                   | -0.07584 |
| URI1                   | -0.07585 |
| SPAG9                  | -0.07587 |
| ALG1L                  | -0.07588 |
| PDLIM3                 | -0.07591 |
| LYPLAL1                | -0.07592 |
| TBC1D2B                | -0.07592 |
| FBXL8                  | -0.07597 |
| COQ5                   | -0.07602 |
| TRAPPC10               | -0.07604 |
| NSMCE3                 | -0.07606 |
| CHN1                   | -0.07607 |
| DMTN                   | -0.07607 |
| ISG15                  | -0.07608 |
| SYNJ1                  | -0.07611 |
| AC019171.1             | -0.07612 |
| NAT14                  | -0.07613 |
| ALS2                   | -0.07614 |
| ELL2                   | -0.07618 |
| CPSF6                  | -0.0762  |
| NOG                    | -0.07622 |
| AQP11                  | -0.07623 |
| ATP13A3                | -0.07624 |
| CARS1                  | -0.07624 |
| TRERF1                 | -0.07625 |
| ABHD15                 | -0.07625 |
| MNAT1                  | -0.07641 |
| YPEL2                  | -0.07641 |
| TAF2                   | -0.07644 |
| RAB19                  | -0.07644 |
| MIER1                  | -0.07657 |

|            |          |
|------------|----------|
| ZNF764     | -0.0766  |
| KATNA1     | -0.0766  |
| LYRM1      | -0.07661 |
| AC012467.2 | -0.07661 |
| NUDT3      | -0.07662 |
| ZNF672     | -0.07664 |
| SRSF2      | -0.07666 |
| TMEM60     | -0.07671 |
| PTDSS1     | -0.07673 |
| RHOQ       | -0.07676 |
| ZSCAN18    | -0.07678 |
| RPIA       | -0.07684 |
| ACP3       | -0.07685 |
| PARD6A     | -0.0769  |
| PSMG1      | -0.0769  |
| EIF5A2     | -0.0769  |
| ZNF426     | -0.0769  |
| RCBTB1     | -0.07691 |
| CDS2       | -0.07698 |
| HMOX1      | -0.07702 |
| RBBP9      | -0.07707 |
| CACNB2     | -0.07713 |
| HPS5       | -0.07715 |
| SOX7       | -0.07723 |
| C2orf69    | -0.07725 |
| STARD4     | -0.07727 |
| RBPMS      | -0.07727 |
| AC022107.1 | -0.07728 |
| SGPP1      | -0.0773  |
| MTX3       | -0.07731 |
| MYO9A      | -0.07732 |
| MOB2       | -0.07737 |
| N4BP2      | -0.0774  |
| CHCHD6     | -0.07741 |
| FAM204A    | -0.07746 |
| CEP68      | -0.07746 |
| C17orf100  | -0.0775  |
| COQ7       | -0.07754 |
| TSC1       | -0.07754 |
| IFT88      | -0.07755 |
| MEMO1      | -0.07755 |
| KIAA0895L  | -0.07764 |
| MTHFSD     | -0.07764 |
| LARP1B     | -0.07785 |
| EOLA1      | -0.07789 |
| AC024933.1 | -0.0779  |
| SLC11A1    | -0.07793 |
| TMEM170A   | -0.07795 |
| SIGLEC12   | -0.07798 |

|            |          |
|------------|----------|
| LIMS2      | -0.07805 |
| DNAJC18    | -0.07807 |
| CAAP1      | -0.07808 |
| DHRS1      | -0.07812 |
| CADPS2     | -0.07813 |
| CRTC3      | -0.07814 |
| PCDHB10    | -0.07819 |
| MGA        | -0.07823 |
| SLC25A32   | -0.07823 |
| WDR83      | -0.07824 |
| NAV1       | -0.07826 |
| DUSP23     | -0.07829 |
| RASIP1     | -0.0783  |
| ITFG2      | -0.07836 |
| AC084880.1 | -0.07836 |
| GDAP2      | -0.07838 |
| C19orf18   | -0.07839 |
| CHST11     | -0.07841 |
| MCF2L-AS1  | -0.07843 |
| COX11      | -0.07843 |
| MTRES1     | -0.07849 |
| NFIX       | -0.07849 |
| RASGRF2    | -0.0785  |
| ABTB1      | -0.07853 |
| PTPDC1     | -0.07854 |
| PRKAB1     | -0.07855 |
| ADAT3      | -0.07855 |
| FANCA      | -0.07862 |
| FAM160A1   | -0.07864 |
| BOC        | -0.07865 |
| FAM50B     | -0.07866 |
| XPC        | -0.07868 |
| TIAM2      | -0.0787  |
| ZNF250     | -0.07873 |
| HNMT       | -0.07875 |
| LHFPL6     | -0.07878 |
| EDA        | -0.0788  |
| PRADC1     | -0.07889 |
| TLCD4      | -0.0789  |
| TIMM10B    | -0.07894 |
| RASSF10-DT | -0.07895 |
| PPP1R13B   | -0.07899 |
| IFT80      | -0.07903 |
| MFSD2A     | -0.07908 |
| SLCO4C1    | -0.07912 |
| TSPAN5     | -0.07913 |
| PDLIM2     | -0.0792  |
| SLC33A1    | -0.0793  |
| TEX30      | -0.0793  |

|            |          |
|------------|----------|
| MRPL34     | -0.0793  |
| ETNK1      | -0.07932 |
| TECPR1     | -0.07933 |
| VHL        | -0.07943 |
| CPPED1     | -0.07944 |
| AP001469.2 | -0.07948 |
| FAUP1      | -0.07957 |
| MRPL41     | -0.07959 |
| MED23      | -0.07961 |
| EMP3       | -0.07963 |
| AC104825.1 | -0.07964 |
| BBS12      | -0.07965 |
| TATDN2     | -0.07965 |
| MTMR9      | -0.07966 |
| POLR3GL    | -0.07972 |
| ZNF529-AS1 | -0.07984 |
| NAP1L1     | -0.07986 |
| ERP27      | -0.07987 |
| PRKD3      | -0.0799  |
| NKX2-1     | -0.07991 |
| AL357033.3 | -0.07991 |
| RNA5SP219  | -0.07991 |
| CALCOCO1   | -0.07994 |
| UBL5       | -0.07995 |
| LRRC37A16P | -0.07998 |
| GDI1       | -0.08002 |
| LENG1      | -0.08003 |
| ZNF251     | -0.08005 |
| STX17      | -0.08013 |
| PICK1      | -0.08015 |
| BTBD9      | -0.08017 |
| FRAT1      | -0.0802  |
| GNL3L      | -0.08021 |
| ARHGAP20   | -0.08022 |
| ARHGEF28   | -0.08025 |
| AC135178.4 | -0.08025 |
| ISCA1P4    | -0.08036 |
| CPNE1      | -0.08042 |
| RBM3       | -0.08047 |
| ZNF785     | -0.08047 |
| SDC3       | -0.08048 |
| ZDHHC23    | -0.08051 |
| GRB2       | -0.08062 |
| SIPA1L3    | -0.08063 |
| DCAF4      | -0.08066 |
| CNIH4      | -0.08071 |
| TRIR       | -0.08072 |
| AC135803.1 | -0.08073 |
| IDH1-AS1   | -0.08075 |



|            |          |
|------------|----------|
| MACROH2A1  | -0.08075 |
| PCYOX1L    | -0.08077 |
| NUP107     | -0.08084 |
| FBXL3      | -0.08096 |
| KDSR       | -0.08097 |
| PLD5       | -0.08098 |
| THYN1      | -0.08098 |
| RDH11      | -0.08102 |
| STK36      | -0.08103 |
| RPS28P5    | -0.08105 |
| TAOK1      | -0.08108 |
| RARB       | -0.0811  |
| UVRAG      | -0.08115 |
| WASH8P     | -0.08115 |
| KATNIP     | -0.08115 |
| CYB561D1   | -0.08122 |
| ADRB1      | -0.08125 |
| AC004477.2 | -0.08125 |
| P2RY6      | -0.08128 |
| PCDH17     | -0.08136 |
| METTL8     | -0.08137 |
| LZTR1      | -0.08138 |
| ABHD17B    | -0.08139 |
| LMOD1      | -0.08142 |
| SOAT1      | -0.08142 |
| RPS12P26   | -0.08144 |
| OGG1       | -0.08144 |
| MAT2B      | -0.08154 |
| PCED1A     | -0.08157 |
| GLDC       | -0.08157 |
| SCAF8      | -0.08162 |
| TFRC       | -0.08162 |
| ZBTB14     | -0.08167 |
| ZNF322     | -0.08167 |
| ENY2       | -0.08167 |
| RPS6KA1    | -0.08168 |
| FAM43A     | -0.08168 |
| LINC02604  | -0.08176 |
| GGACT      | -0.08179 |
| ZNF790     | -0.0818  |
| IQCC       | -0.08182 |
| LINC02482  | -0.08182 |
| ZNF680     | -0.08193 |
| OAZ1       | -0.08195 |
| PLEKHA1    | -0.08199 |
| SMIM26     | -0.082   |
| TRMU       | -0.08201 |
| AC069281.2 | -0.08203 |
| SCAPER     | -0.08206 |

|            |          |
|------------|----------|
| GSTK1      | -0.08207 |
| SPICE1     | -0.08208 |
| INVS       | -0.08211 |
| LATS1      | -0.08216 |
| LRRC8B     | -0.0822  |
| AL355803.1 | -0.0822  |
| TCTN1      | -0.08234 |
| MARS2      | -0.08237 |
| BEX5       | -0.08238 |
| CC2D1A     | -0.08238 |
| MID1IP1    | -0.08239 |
| GPR3       | -0.08241 |
| WRN        | -0.08245 |
| MRPL53     | -0.0825  |
| GSTA4      | -0.0825  |
| ADPGK      | -0.08251 |
| ZNF350-AS1 | -0.08255 |
| HAUS3      | -0.08259 |
| SRSF11     | -0.08263 |
| GNG11      | -0.0827  |
| LYRM7      | -0.08273 |
| MT-CO1     | -0.08275 |
| MBOAT1     | -0.08279 |
| HSPE1P2    | -0.08285 |
| SLC52A1    | -0.08287 |
| ANGEL2     | -0.08289 |
| SDF2L1     | -0.08289 |
| KIF2A      | -0.08291 |
| ZNF330     | -0.08291 |
| KCNIP3     | -0.08291 |
| AC145423.1 | -0.08291 |
| AC027575.2 | -0.08293 |
| PRKCE      | -0.08293 |
| AP001330.4 | -0.08294 |
| DNAJC24    | -0.08295 |
| NRBP2      | -0.08298 |
| ITM2C      | -0.08302 |
| MND1       | -0.08303 |
| CSF3R      | -0.08304 |
| USP38      | -0.08307 |
| ZNF860     | -0.08309 |
| AL596218.1 | -0.08315 |
| SETD2      | -0.08316 |
| AREL1      | -0.0832  |
| FAM200B    | -0.08321 |
| PRKAG2-AS1 | -0.08322 |
| CPSF1      | -0.08323 |
| M6PR       | -0.08323 |
| MTND4P12   | -0.08324 |

|            |          |
|------------|----------|
| MYBPHL     | -0.08325 |
| NARS1      | -0.08326 |
| SPCS2      | -0.08329 |
| ABRACL     | -0.08341 |
| ZMYM5      | -0.08343 |
| ZNF324B    | -0.08346 |
| DAZAP2P1   | -0.08352 |
| UBR3       | -0.08354 |
| AC009113.1 | -0.08354 |
| ERH        | -0.08355 |
| KCNK17     | -0.08356 |
| BNIP3P11   | -0.0836  |
| VAMP4      | -0.08362 |
| AC093227.1 | -0.08366 |
| LINC01389  | -0.08366 |
| D2HGDH     | -0.08367 |
| DYRK1A     | -0.08378 |
| LINC02035  | -0.08384 |
| CLTA       | -0.08386 |
| CICP14     | -0.08387 |
| AC090204.1 | -0.08393 |
| ANKS3      | -0.08394 |
| ARFGEF2    | -0.08397 |
| HSPB6      | -0.08401 |
| CYB5B      | -0.08409 |
| CHAC2      | -0.08409 |
| TUBGCP3    | -0.0841  |
| ZBTB43     | -0.08415 |
| UGT8       | -0.08416 |
| MGMT       | -0.08418 |
| EHD3       | -0.08419 |
| SNHG4      | -0.08425 |
| GTF2A1     | -0.08431 |
| URB1-AS1   | -0.08432 |
| AGBL5-IT1  | -0.08432 |
| TRIP11     | -0.08433 |
| NAGA       | -0.08435 |
| SNORA9B    | -0.08441 |
| ELP3       | -0.08445 |
| METTL25    | -0.0845  |
| APOD       | -0.08452 |
| AZIN1      | -0.08456 |
| CCDC32     | -0.08459 |
| MTRF1      | -0.08463 |
| TCEANC2    | -0.08466 |
| PER2       | -0.08467 |
| SPRING1    | -0.08468 |
| CNOT7      | -0.08476 |
| AC010973.2 | -0.08478 |

|            |          |
|------------|----------|
| ACTR10     | -0.08479 |
| MTF2       | -0.08482 |
| AC007485.1 | -0.08484 |
| CCDC134    | -0.08485 |
| RAP1A      | -0.08487 |
| ZSCAN31    | -0.08488 |
| ASTE1      | -0.08494 |
| PMS1       | -0.08498 |
| ING1       | -0.08499 |
| FUT6       | -0.08506 |
| AL450384.2 | -0.0851  |
| LIPT2      | -0.08521 |
| BAIAP3     | -0.08533 |
| CNEP1R1    | -0.08533 |
| SPATA33    | -0.08534 |
| ZNF623     | -0.08539 |
| SLC26A1    | -0.08539 |
| STK11IP    | -0.08542 |
| CBL        | -0.0855  |
| BDH2       | -0.08562 |
| SLC49A4    | -0.08567 |
| DTX4       | -0.08568 |
| LYN        | -0.08575 |
| STAG3L2    | -0.08581 |
| ZNF821     | -0.08581 |
| RAB8A      | -0.08586 |
| GPC4       | -0.08588 |
| DEFB1      | -0.08592 |
| HNRNPA3    | -0.08593 |
| PITPNM1    | -0.08593 |
| FKBP10     | -0.08598 |
| HEATR3     | -0.08599 |
| C7orf31    | -0.08602 |
| NT5DC1     | -0.08602 |
| ATG7       | -0.08612 |
| OASL       | -0.08613 |
| CCDC138    | -0.08614 |
| DENND4C    | -0.08618 |
| MCPH1      | -0.08622 |
| LRRC37A17P | -0.08624 |
| AGO4       | -0.08626 |
| TBC1D12    | -0.08629 |
| AL133520.1 | -0.0863  |
| SNORD123   | -0.0863  |
| FUNDC2     | -0.08631 |
| TERF2IP    | -0.08632 |
| VPS8       | -0.08641 |
| AC005261.1 | -0.08643 |
| ZDHHC1     | -0.08643 |

|            |          |
|------------|----------|
| NUDT4      | -0.08644 |
| MPHOSPH8   | -0.08644 |
| MIDEAS     | -0.08648 |
| ASXL2      | -0.08652 |
| DOT1L      | -0.08653 |
| PHF20L1    | -0.08654 |
| ADSL       | -0.08658 |
| NDUFA13    | -0.08659 |
| MSRA       | -0.08666 |
| AC139530.1 | -0.08669 |
| SHANK3     | -0.08672 |
| PEA15      | -0.08676 |
| PTPN18     | -0.08676 |
| MTMR1      | -0.08678 |
| NARF       | -0.08681 |
| GUCY1B1    | -0.08686 |
| AKAP8L     | -0.08691 |
| AC129507.3 | -0.08691 |
| KANSL1     | -0.08696 |
| CAMK1      | -0.08703 |
| AC026355.2 | -0.08704 |
| PLEKHA7    | -0.08706 |
| FRMD3      | -0.08708 |
| NUDT19     | -0.08709 |
| POGLUT1    | -0.08711 |
| ELMO2      | -0.08724 |
| SNX11      | -0.08726 |
| SPIDR      | -0.08727 |
| PI4KA      | -0.08735 |
| CCDC68     | -0.08739 |
| STX16      | -0.08741 |
| SAFB2      | -0.08741 |
| ZNF507     | -0.08742 |
| VRK1       | -0.08745 |
| LMBRD1     | -0.08748 |
| AC008393.1 | -0.08766 |
| AC022415.1 | -0.08778 |
| TENT4B     | -0.08778 |
| SATB1      | -0.08785 |
| AC002075.2 | -0.08787 |
| BTBD19     | -0.08792 |
| AMD1       | -0.08795 |
| ZBTB21     | -0.08796 |
| DCAF15     | -0.08797 |
| AKAP8      | -0.08798 |
| PELATON    | -0.088   |
| AC131009.3 | -0.0881  |
| ANAPC1P2   | -0.0881  |
| PIN1       | -0.08814 |

|            |          |
|------------|----------|
| PHKA2      | -0.08825 |
| ADPRHL1    | -0.08825 |
| RAD51D     | -0.08825 |
| ZNF133     | -0.08827 |
| IPO4       | -0.08828 |
| LBH        | -0.08829 |
| SOX17      | -0.08834 |
| UGDH-AS1   | -0.08835 |
| SLC26A11   | -0.08835 |
| NMRK1      | -0.08836 |
| LYRM2      | -0.08845 |
| NSMCE2     | -0.08851 |
| HEXIM2     | -0.08852 |
| WASH2P     | -0.08856 |
| ZNF480     | -0.08856 |
| IL6R       | -0.08862 |
| ERCC4      | -0.08864 |
| GPR35      | -0.0887  |
| SGSM3      | -0.08872 |
| AC011442.1 | -0.08873 |
| KIZ        | -0.08877 |
| OAS1       | -0.08879 |
| ANKRD13D   | -0.0888  |
| BRWD1      | -0.08883 |
| NIFK-AS1   | -0.08884 |
| HSDL1      | -0.08888 |
| NINL       | -0.08891 |
| ALG5       | -0.08894 |
| ZNF585A    | -0.08901 |
| ATP6V1C1   | -0.08906 |
| CCDC167    | -0.08907 |
| TRIM5      | -0.08916 |
| SAT2       | -0.08917 |
| ZEB1       | -0.08921 |
| TNFRSF10A  | -0.08924 |
| FBXL6      | -0.08925 |
| AC024940.2 | -0.08929 |
| AL158212.3 | -0.0893  |
| DDX58      | -0.0893  |
| CDIP1      | -0.08932 |
| C12orf73   | -0.08932 |
| GALNT6     | -0.08936 |
| NUB1       | -0.08938 |
| MAP3K5     | -0.08942 |
| FAM229A    | -0.08944 |
| ARID4B     | -0.08946 |
| ARHGAP8    | -0.08949 |
| IRGQ       | -0.08956 |
| TFDP2      | -0.08956 |

|            |          |
|------------|----------|
| TRAF6      | -0.0896  |
| AC036176.1 | -0.08967 |
| ZNF70      | -0.08969 |
| SMIM29     | -0.08969 |
| SIRT1      | -0.0897  |
| MBNL1-AS1  | -0.08972 |
| DCAF11     | -0.08977 |
| MIR499A    | -0.08979 |
| UQCRB      | -0.08982 |
| AC068580.1 | -0.08986 |
| DNASE1     | -0.08991 |
| AC097359.2 | -0.08992 |
| RALGAPA2   | -0.08993 |
| MAP3K2-DT  | -0.08995 |
| SF3B1      | -0.09001 |
| ADAMTS13   | -0.09004 |
| MANF       | -0.09008 |
| AC236972.3 | -0.09009 |
| AL513165.1 | -0.0901  |
| AC010809.1 | -0.09011 |
| AC016747.1 | -0.09011 |
| DOK1       | -0.09014 |
| DLEU1      | -0.09016 |
| ACBD4      | -0.09019 |
| ZNF155     | -0.09029 |
| ALKBH1     | -0.09034 |
| CASP8AP2   | -0.09039 |
| MED30      | -0.09041 |
| ANKZF1     | -0.09047 |
| SNCA       | -0.09052 |
| AC011944.1 | -0.09053 |
| PPP1R12C   | -0.09055 |
| WASH4P     | -0.09058 |
| CDRT15P1   | -0.0906  |
| SHC2       | -0.09061 |
| TAMM41     | -0.09068 |
| SYNGR1     | -0.09068 |
| FXVD6      | -0.09072 |
| RPAIN      | -0.09074 |
| SELENOO    | -0.09074 |
| OPTN       | -0.09076 |
| FBXL5      | -0.09078 |
| LNP1       | -0.09078 |
| AP002748.4 | -0.09079 |
| HEY1       | -0.0908  |
| CCSAP      | -0.0908  |
| AP002387.1 | -0.09083 |
| PEAR1      | -0.09083 |
| TCIM       | -0.09087 |

|            |          |
|------------|----------|
| C2orf74    | -0.09098 |
| HMGN2P46   | -0.09102 |
| B9D2       | -0.09102 |
| ZFP82      | -0.09111 |
| SMC6       | -0.09111 |
| AC084036.1 | -0.09113 |
| ADGRL4     | -0.09116 |
| GNA13      | -0.09118 |
| TUBA1A     | -0.09118 |
| CDC37L1    | -0.09124 |
| TNS3       | -0.09126 |
| VAMP8      | -0.09127 |
| ST6GALNAC3 | -0.09127 |
| ZNF776     | -0.09128 |
| TMTC2      | -0.09138 |
| ARL6IP5    | -0.09145 |
| EXD2       | -0.09145 |
| GSTM1      | -0.09146 |
| STAG1      | -0.09161 |
| AL132822.1 | -0.09161 |
| EVA1A      | -0.09162 |
| VN1R1      | -0.09171 |
| DPP4       | -0.09175 |
| DNAJC6     | -0.09175 |
| NMT2       | -0.09177 |
| TTC5       | -0.09178 |
| LINC01806  | -0.0918  |
| NUDT18     | -0.09182 |
| DACT2      | -0.09187 |
| THAP9      | -0.09189 |
| NUDT2      | -0.09193 |
| VPS29      | -0.09194 |
| ZUP1       | -0.09197 |
| ZNF654     | -0.09197 |
| RNY3P16    | -0.09199 |
| AC092171.5 | -0.09202 |
| SH3BP2     | -0.09205 |
| AKR7A3     | -0.09212 |
| ANKRD27    | -0.09212 |
| DOC2B      | -0.09215 |
| GLIS2-AS1  | -0.09218 |
| GBGT1      | -0.09222 |
| ARMCX4     | -0.09223 |
| CLUAP1     | -0.09226 |
| STAU2      | -0.09228 |
| OSBPL1A    | -0.09234 |
| SECISBP2   | -0.09236 |
| MCOLN1     | -0.09238 |
| ZNF765     | -0.09238 |



|             |          |
|-------------|----------|
| IRF3        | -0.09239 |
| AC016866.1  | -0.09239 |
| POLG2       | -0.0924  |
| ZNF596      | -0.0924  |
| DCDC2       | -0.0924  |
| PDE7B       | -0.09248 |
| OPRL1       | -0.09249 |
| TFPT        | -0.09252 |
| PRDM6       | -0.09261 |
| KLK14       | -0.09263 |
| GEMIN8      | -0.09266 |
| MRE11       | -0.09267 |
| ZNF608      | -0.09268 |
| GSTM4       | -0.0927  |
| L3HYPDH     | -0.09271 |
| CMC1        | -0.09279 |
| AC009403.1  | -0.0928  |
| TRPM7       | -0.09281 |
| MAN2C1      | -0.09284 |
| PHTF2       | -0.09286 |
| GPR75       | -0.09288 |
| SLC30A4     | -0.0929  |
| PPP2R3B     | -0.09293 |
| ALG9        | -0.09297 |
| PDSS2       | -0.09298 |
| AC100814.1  | -0.09299 |
| PTTG1       | -0.093   |
| C6orf223    | -0.09305 |
| FAM160A1-DT | -0.09311 |
| ASNS        | -0.09316 |
| FMO1        | -0.09318 |
| ZNF213-AS1  | -0.09322 |
| ZNF587B     | -0.09323 |
| CABP4       | -0.09323 |
| KRI1        | -0.09324 |
| ST3GAL2     | -0.09329 |
| CPS1        | -0.0933  |
| ANKRA2      | -0.09336 |
| DHRS4       | -0.09338 |
| HSD17B14    | -0.09338 |
| FAM172A     | -0.0934  |
| ST3GAL5     | -0.09341 |
| NGLY1       | -0.09344 |
| CLDN10-AS1  | -0.09347 |
| DUSP10      | -0.0935  |
| TMED5       | -0.09352 |
| Z69706.1    | -0.09355 |
| ISCA2       | -0.09357 |
| INTS10      | -0.09358 |

|            |          |
|------------|----------|
| RPL21P75   | -0.09359 |
| C2CD5      | -0.0936  |
| YTHDF3-AS1 | -0.09363 |
| ZNF619     | -0.09363 |
| ERCC5      | -0.09366 |
| KTN1       | -0.09368 |
| AC011451.1 | -0.09376 |
| PPP4R3A    | -0.09376 |
| TINF2      | -0.09382 |
| RBIS       | -0.09386 |
| SYVN1      | -0.09387 |
| ENPP4      | -0.09387 |
| HMGB2      | -0.09388 |
| ZFP62      | -0.09388 |
| CFAP58-DT  | -0.09389 |
| AC254633.1 | -0.09389 |
| IFNGR2     | -0.09397 |
| SALL4      | -0.094   |
| WSB1       | -0.09401 |
| NR2C1      | -0.09403 |
| AHI1       | -0.09405 |
| DYRK3      | -0.09407 |
| ARHGAP17   | -0.09407 |
| TMEM47     | -0.09409 |
| YJU2       | -0.09413 |
| HDHD2      | -0.09415 |
| AL357033.4 | -0.09417 |
| UBE2W      | -0.09421 |
| TTLL5      | -0.09422 |
| GALNT17    | -0.09425 |
| POLR2K     | -0.09427 |
| PPP1R9B    | -0.09428 |
| FAM76A     | -0.09429 |
| ROCK1      | -0.09443 |
| ODF3L1     | -0.09445 |
| HIKESHP2   | -0.09449 |
| PIK3C2A    | -0.0945  |
| CLASP2     | -0.09454 |
| ZNF812P    | -0.09454 |
| GABPA      | -0.09458 |
| RGS10      | -0.09459 |
| CD82       | -0.09461 |
| UNC5CL     | -0.0947  |
| LINC01767  | -0.09483 |
| ARNTL      | -0.09483 |
| SQLE       | -0.09484 |
| STX4       | -0.09485 |
| LOH12CR2   | -0.09486 |
| ZNF862     | -0.09487 |

|            |          |
|------------|----------|
| LIPT1      | -0.09488 |
| AP006621.3 | -0.09494 |
| ACOT1      | -0.09495 |
| PLEKHA4    | -0.09496 |
| FBXL2      | -0.09497 |
| OSBPL11    | -0.09499 |
| PIP4P2     | -0.09501 |
| MARK3      | -0.09515 |
| AC004877.2 | -0.09521 |
| ZDHHC11    | -0.09523 |
| CEP57L1    | -0.09523 |
| APPL2      | -0.09525 |
| ZNF121     | -0.09526 |
| PLPP6      | -0.09529 |
| MTSS1      | -0.09533 |
| TARBP1     | -0.09534 |
| AL132657.1 | -0.0954  |
| TCEAL3     | -0.09542 |
| LRRFIP1P1  | -0.09547 |
| NXF1       | -0.09549 |
| AC120036.3 | -0.09558 |
| DNAJB14    | -0.09559 |
| RELB       | -0.0956  |
| NBL1       | -0.09563 |
| BORCS8     | -0.09568 |
| ZNF749     | -0.09572 |
| PCMTD1     | -0.09579 |
| LINC01184  | -0.0958  |
| MTCP1      | -0.09583 |
| TMEM71     | -0.09587 |
| LYSMD3     | -0.09587 |
| SYNPR-AS1  | -0.09588 |
| TMEM98     | -0.09588 |
| AL135925.1 | -0.0959  |
| MTUS1      | -0.09591 |
| LINC02609  | -0.09598 |
| CD27-AS1   | -0.09599 |
| LINC00676  | -0.09604 |
| MAP3K2     | -0.09607 |
| DPP7       | -0.09608 |
| AGAP9      | -0.09609 |
| POU2F1     | -0.0961  |
| AC000123.2 | -0.09621 |
| SEPHS2     | -0.09621 |
| NINJ2-AS1  | -0.09624 |
| MBTD1      | -0.09624 |
| AC091271.1 | -0.09627 |
| NMNAT3     | -0.0963  |
| DPYSL2     | -0.09631 |

|            |          |
|------------|----------|
| MT-ND2     | -0.09631 |
| TBRG1      | -0.09634 |
| FUNDC2P1   | -0.09641 |
| AK3        | -0.09642 |
| ZSCAN12    | -0.09645 |
| KIF9       | -0.09652 |
| FUT2       | -0.09657 |
| LINC01138  | -0.09659 |
| GAPVD1     | -0.0966  |
| ZNF423     | -0.09661 |
| ZNF252P    | -0.09662 |
| FAXC       | -0.09663 |
| CGGBP1     | -0.09664 |
| OLR1       | -0.09667 |
| ZNF433     | -0.0967  |
| GBA2       | -0.09673 |
| WDR47      | -0.09682 |
| ZNF512     | -0.09683 |
| MTO1       | -0.09685 |
| NATD1      | -0.09685 |
| DEPDC5     | -0.09686 |
| AC004264.1 | -0.09687 |
| TRAF3IP1   | -0.09691 |
| ZFYVE16    | -0.09694 |
| MOSPD2     | -0.09696 |
| GABPB2     | -0.09697 |
| JKAMP      | -0.09705 |
| PGBD4      | -0.09716 |
| NHSL1      | -0.09718 |
| RYBP       | -0.09718 |
| EAPP       | -0.09719 |
| TRIM44     | -0.0972  |
| C4BPA      | -0.09721 |
| L3MBTL1    | -0.09729 |
| MOCS1      | -0.09729 |
| NFE2L2     | -0.09736 |
| HARBI1     | -0.09737 |
| ZNF22      | -0.09742 |
| HMGB3      | -0.09745 |
| MTMR3      | -0.0975  |
| NINJ2      | -0.09754 |
| PRKG2      | -0.09756 |
| QRICH2     | -0.09758 |
| SNTB2      | -0.09765 |
| TMC6       | -0.09769 |
| SH3TC1     | -0.09769 |
| AL033519.4 | -0.09771 |
| MOB1A      | -0.09774 |
| NRGN       | -0.09784 |

|            |          |
|------------|----------|
| TYW5       | -0.09785 |
| DYM        | -0.09791 |
| CHRNA5     | -0.09796 |
| TYMSOS     | -0.09801 |
| SNAPC4     | -0.09807 |
| PLAAT3     | -0.09812 |
| PRX        | -0.09825 |
| MRPL52     | -0.0983  |
| SYCP2      | -0.09838 |
| VPS37C     | -0.0984  |
| ELF1       | -0.09841 |
| LINC01023  | -0.09842 |
| CLCN6      | -0.09845 |
| DNMT1      | -0.09849 |
| IER3IP1    | -0.0985  |
| IFT81      | -0.0985  |
| MTERF4     | -0.0985  |
| SIX4       | -0.09851 |
| TIMM21     | -0.09851 |
| UBA52P5    | -0.09857 |
| CHCHD7     | -0.09858 |
| ARSB       | -0.09859 |
| CTAG2      | -0.09862 |
| DDX3Y      | -0.09863 |
| AC021028.1 | -0.09868 |
| AC098484.1 | -0.09871 |
| SPATA25    | -0.09871 |
| CD93       | -0.09874 |
| AC090543.2 | -0.09885 |
| ZBTB49     | -0.09886 |
| ERMARD     | -0.09896 |
| EED        | -0.09898 |
| TDRD3      | -0.09901 |
| AP000254.2 | -0.09906 |
| LINC00839  | -0.09919 |
| ZSWIM3     | -0.0992  |
| PEAK1      | -0.09927 |
| AL117332.1 | -0.09932 |
| CDK10      | -0.0994  |
| CCDC61     | -0.09948 |
| ABO        | -0.09951 |
| NAPA-AS1   | -0.09951 |
| KCNF1      | -0.09955 |
| DAGLA      | -0.09962 |
| PRKD2      | -0.09964 |
| DCN        | -0.09967 |
| EGOT       | -0.0997  |
| ORC6       | -0.09971 |
| ZNF562     | -0.09972 |

|             |          |
|-------------|----------|
| KDM4A-AS1   | -0.09974 |
| BMP8B       | -0.09975 |
| ARHGEF39    | -0.09978 |
| COX4I1      | -0.09985 |
| LGALS8      | -0.09986 |
| AL645939.3  | -0.09987 |
| HADH        | -0.09988 |
| AC138207.3  | -0.09989 |
| CEP95       | -0.09989 |
| PPP1R3B     | -0.09997 |
| MIR4458HG   | -0.09998 |
| WDR37       | -0.09999 |
| HDX         | -0.1     |
| COMMD7      | -0.10001 |
| TOX         | -0.10003 |
| AC137932.3  | -0.10005 |
| GXYLT2      | -0.10007 |
| MFSD14C     | -0.1001  |
| BCAS4       | -0.10011 |
| SEC22C      | -0.10012 |
| KCNQ5       | -0.10016 |
| C5AR1       | -0.10024 |
| JMJD1C-AS1  | -0.10024 |
| HNRNPDL     | -0.10029 |
| RNASEH1-AS1 | -0.10032 |
| TANGO6      | -0.10032 |
| SSBP4       | -0.10039 |
| SIX1        | -0.1004  |
| APOO        | -0.10044 |
| MSL1        | -0.10046 |
| AC018809.2  | -0.10052 |
| PDP1        | -0.10057 |
| SS18L2      | -0.10062 |
| FPR2        | -0.10065 |
| MTHFD2      | -0.10066 |
| XYLT1       | -0.10071 |
| WDR62       | -0.10072 |
| IMMP1L      | -0.10073 |
| CEP63       | -0.10076 |
| TMEM61      | -0.10077 |
| ZNF317      | -0.10078 |
| ZNF549      | -0.10081 |
| MT-CO3      | -0.10081 |
| SLC35E2A    | -0.10082 |
| DEPTOR      | -0.10083 |
| INPP5B      | -0.10083 |
| PDK3        | -0.10083 |
| ZNF783      | -0.10092 |
| SPTLC2      | -0.10093 |

|            |          |
|------------|----------|
| TMSB4Y     | -0.10098 |
| MOB3A      | -0.10102 |
| MRPL13     | -0.10106 |
| ABLIM2     | -0.1011  |
| TMEM161B   | -0.10112 |
| HPD        | -0.10115 |
| FUS        | -0.1012  |
| CYB5RL     | -0.10122 |
| LINC01671  | -0.10129 |
| TRAPPC2    | -0.1013  |
| GRAMD1C    | -0.10134 |
| ATXN1      | -0.10135 |
| OSTF1      | -0.10136 |
| PLAGL1     | -0.10138 |
| SLC27A2    | -0.10143 |
| ZNF264     | -0.10146 |
| IDS        | -0.1015  |
| C12orf4    | -0.10155 |
| PABPC1L    | -0.10158 |
| ALOX15B    | -0.10159 |
| AP003486.1 | -0.10166 |
| MLLT10     | -0.10167 |
| RPL21      | -0.10173 |
| AL133367.1 | -0.10174 |
| SMYD3      | -0.10177 |
| ZNF287     | -0.10178 |
| PTPRJ      | -0.1018  |
| SNAPC3     | -0.10184 |
| TPGS1      | -0.10184 |
| DTX3L      | -0.10185 |
| BAX        | -0.10185 |
| DTWD2      | -0.10186 |
| MRPS25     | -0.10194 |
| R3HCC1L    | -0.10194 |
| CYP2R1     | -0.10199 |
| TTC33      | -0.10201 |
| SLC25A36   | -0.10203 |
| CRY1       | -0.10205 |
| ADAMTSL2   | -0.10217 |
| GLUD2      | -0.10222 |
| WNT3A      | -0.10224 |
| MR1        | -0.10225 |
| F13A1      | -0.10228 |
| KCNMB1     | -0.10239 |
| AC000123.1 | -0.10239 |
| FAM122A    | -0.10253 |
| LRRC27     | -0.10263 |
| AP000866.4 | -0.10264 |
| ADPRM      | -0.10267 |

|            |          |
|------------|----------|
| SYT17      | -0.1027  |
| AC090425.2 | -0.10271 |
| RBL2       | -0.10275 |
| CRY2       | -0.10276 |
| AC034243.1 | -0.10279 |
| TTC8       | -0.10281 |
| CSRNP1     | -0.10285 |
| DMAC1      | -0.10286 |
| CDKL2      | -0.10287 |
| NEK1       | -0.10296 |
| ATOX1      | -0.10302 |
| PER1       | -0.10307 |
| FAM227B    | -0.10309 |
| CIRBP-AS1  | -0.1031  |
| IFT43      | -0.10313 |
| ZNF624     | -0.10314 |
| ZMAT3      | -0.10331 |
| AL139099.3 | -0.10331 |
| ASB16-AS1  | -0.10333 |
| AC011462.4 | -0.10335 |
| LBR        | -0.10338 |
| RANBP10    | -0.10341 |
| TRIQK      | -0.10342 |
| VWA7       | -0.10343 |
| NEK3       | -0.10357 |
| CLDN5      | -0.10358 |
| Z98884.2   | -0.10359 |
| ADCK5      | -0.10361 |
| ST7-AS1    | -0.10361 |
| MED13      | -0.10367 |
| NBN        | -0.10368 |
| IFNGR1     | -0.1037  |
| MIOS-DT    | -0.10376 |
| TMEM8B     | -0.10379 |
| PHOSPHO2   | -0.10384 |
| PRR15L     | -0.10386 |
| NHLRC3     | -0.1039  |
| RSBN1      | -0.10393 |
| PRR14      | -0.10398 |
| PHTF1      | -0.104   |
| LRRCC1     | -0.10402 |
| AC002091.2 | -0.10407 |
| SCYL3      | -0.10408 |
| AP1B1      | -0.10409 |
| UBAC1      | -0.10412 |
| AC040970.1 | -0.10413 |
| BST2       | -0.10414 |
| SPIN3      | -0.10416 |
| ZFP2       | -0.10417 |



|              |          |
|--------------|----------|
| TMEM108      | -0.10421 |
| PPIAP39      | -0.10429 |
| RBMS3        | -0.1043  |
| KDM5D        | -0.10433 |
| ANKRD16      | -0.10434 |
| RPS10P5      | -0.10436 |
| AC006042.1   | -0.10441 |
| CEP290       | -0.10449 |
| CAPN8        | -0.10453 |
| ZNF33A       | -0.10455 |
| ARID2        | -0.10457 |
| CEBPA-DT     | -0.10462 |
| C1orf21      | -0.10479 |
| AC004839.1   | -0.10481 |
| TMEM198B     | -0.10484 |
| SNORD104     | -0.10485 |
| AC105389.2   | -0.10493 |
| DDX60L       | -0.10495 |
| AL592148.3   | -0.105   |
| DDX19B       | -0.1051  |
| LOXL3        | -0.10514 |
| SLC7A8       | -0.10515 |
| CBWD2        | -0.10515 |
| KHNYN        | -0.10518 |
| LMNTD2-AS1   | -0.10526 |
| CNR1         | -0.10528 |
| RBMS1P1      | -0.10537 |
| IFT140       | -0.10538 |
| RO60         | -0.10539 |
| MED13L       | -0.10541 |
| PHLPP2       | -0.10542 |
| RPL23AP53    | -0.10544 |
| DUSP18       | -0.10546 |
| GADD45B      | -0.10554 |
| MRPL54       | -0.10556 |
| FPR1         | -0.10561 |
| SLC18B1      | -0.10566 |
| ARHGEF26-AS1 | -0.1057  |
| EMC2         | -0.10575 |
| LRMDA        | -0.10578 |
| CEP89        | -0.10579 |
| RNF13        | -0.10581 |
| AC037487.3   | -0.10587 |
| ENOSF1       | -0.10591 |
| LRRC75A      | -0.10594 |
| AC009093.3   | -0.10595 |
| EPOR         | -0.10599 |
| CDK17        | -0.106   |
| PHACTR1      | -0.106   |

|            |          |
|------------|----------|
| VAC14      | -0.10602 |
| AC034236.2 | -0.10602 |
| LITAF      | -0.10602 |
| AC022211.3 | -0.10605 |
| RPS2P32    | -0.10624 |
| LINC02481  | -0.10625 |
| CELF1      | -0.10625 |
| ABCD4      | -0.10628 |
| PEX3       | -0.10628 |
| MST1P2     | -0.10635 |
| ZNF335     | -0.10638 |
| RN7SKP239  | -0.10639 |
| AC004803.1 | -0.10641 |
| AC105219.3 | -0.10642 |
| CCNT2      | -0.10643 |
| NXT1       | -0.10646 |
| RBPJ       | -0.10651 |
| RTRAF      | -0.10654 |
| LINC02210  | -0.10656 |
| FAHD2A     | -0.10659 |
| PDZD2      | -0.10659 |
| FAM120C    | -0.1066  |
| RNASE1     | -0.10661 |
| AC004540.1 | -0.10662 |
| EFR3A      | -0.10662 |
| TBC1D17    | -0.10667 |
| CCDC50     | -0.10668 |
| AL603839.3 | -0.10669 |
| ELL        | -0.10669 |
| ZNF707     | -0.1067  |
| INTS9      | -0.10671 |
| SIPA1      | -0.10685 |
| SLC35F5    | -0.10687 |
| COL25A1    | -0.10689 |
| PIGN       | -0.10692 |
| B4GALNT3   | -0.10697 |
| DNAJA4     | -0.10698 |
| MON2       | -0.10699 |
| AC016065.1 | -0.10703 |
| KIAA1109   | -0.10703 |
| KANSL3     | -0.10704 |
| TTLL11     | -0.10713 |
| MYG1-AS1   | -0.10714 |
| PDE8B      | -0.10732 |
| SLC29A3    | -0.10732 |
| XPO4       | -0.10736 |
| PUS7L      | -0.10741 |
| JUND       | -0.10743 |
| PBLD       | -0.10743 |

|            |          |
|------------|----------|
| ZNF599     | -0.10744 |
| AC025165.5 | -0.10745 |
| AL391834.2 | -0.10745 |
| ZNF717     | -0.10747 |
| MLYCD      | -0.1075  |
| AC118553.1 | -0.10753 |
| EEF2K      | -0.10757 |
| RB1        | -0.1076  |
| PRDM5      | -0.10764 |
| ZNF17      | -0.10766 |
| AC004232.2 | -0.1077  |
| AC068580.3 | -0.10771 |
| SARNP      | -0.10774 |
| SAPCD1-AS1 | -0.10776 |
| LRBA       | -0.10777 |
| AC106820.3 | -0.10779 |
| AC073857.1 | -0.10789 |
| KAZN       | -0.10791 |
| SLC43A3    | -0.10791 |
| RC3H2      | -0.10791 |
| RNPC3      | -0.10798 |
| CAMK1D     | -0.10801 |
| AGO3       | -0.10802 |
| AL606834.1 | -0.10812 |
| SLC2A8     | -0.10824 |
| RPRD1A     | -0.1083  |
| AC092070.2 | -0.10831 |
| ADGRF1     | -0.10832 |
| AP006621.5 | -0.10838 |
| ANK3       | -0.1084  |
| RABGGTB    | -0.10847 |
| AC106782.5 | -0.1085  |
| LILRA5     | -0.10851 |
| TRAPPC13   | -0.10852 |
| AC139100.2 | -0.10852 |
| AC004923.1 | -0.10856 |
| RBL1       | -0.10857 |
| RNU6-516P  | -0.1086  |
| PCBP3      | -0.10864 |
| MARCHF3    | -0.10868 |
| ENKD1      | -0.10868 |
| GAS2L3     | -0.1087  |
| SIGIRR     | -0.10873 |
| AC004975.1 | -0.10882 |
| PDIK1L     | -0.10885 |
| PTBP2      | -0.10887 |
| DOCK9      | -0.10887 |
| MT-CYB     | -0.10887 |
| REV1       | -0.10891 |

|            |          |
|------------|----------|
| KMT2A      | -0.10896 |
| SCUBE3     | -0.10901 |
| CIAO2A     | -0.10902 |
| RPSAP9     | -0.10903 |
| TOLLIP-AS1 | -0.10904 |
| CCT6B      | -0.10909 |
| MTMR14     | -0.10909 |
| MECP2      | -0.1091  |
| AL078581.1 | -0.10911 |
| AC120053.1 | -0.10911 |
| RNF227     | -0.10912 |
| ZBED3      | -0.10913 |
| PNN        | -0.10914 |
| ZNF444     | -0.10916 |
| STX2       | -0.10916 |
| PSENEN     | -0.10918 |
| SLC28A3    | -0.10922 |
| INTU       | -0.10923 |
| TGM2       | -0.10924 |
| AMDHD2     | -0.10925 |
| ANAPC2     | -0.10926 |
| HSF4       | -0.10929 |
| ABCA11P    | -0.1093  |
| RBM26      | -0.10931 |
| JHY        | -0.10935 |
| CAPN10     | -0.10936 |
| SELENOS    | -0.10944 |
| OSBPL8     | -0.1095  |
| SLC25A51   | -0.10953 |
| OAT        | -0.10956 |
| HSPA4L     | -0.10957 |
| AL359921.2 | -0.10964 |
| LINC01232  | -0.10965 |
| PI4KAP2    | -0.10968 |
| SLC9B2     | -0.10976 |
| AL445250.1 | -0.10976 |
| ZNF527     | -0.10982 |
| ZNF473     | -0.10983 |
| HIPK3      | -0.10983 |
| CLUL1      | -0.10985 |
| GLTPD2     | -0.10985 |
| ZNF137P    | -0.1099  |
| DNAJC22    | -0.10997 |
| EFCAB15P   | -0.10998 |
| BBS9       | -0.11001 |
| TRAK2      | -0.11002 |
| USP27X-AS1 | -0.1101  |
| EML3       | -0.11011 |
| RPSAP53    | -0.11012 |

|            |          |
|------------|----------|
| RGS14      | -0.11014 |
| AL513218.1 | -0.11015 |
| RFXAP      | -0.11017 |
| XRRA1      | -0.11029 |
| AC104819.3 | -0.11033 |
| SPRN       | -0.11037 |
| KDM7A-DT   | -0.11042 |
| PAMR1      | -0.11042 |
| VPS13D     | -0.11045 |
| TNRC6A     | -0.11045 |
| DHRS4L2    | -0.11047 |
| NSUN6      | -0.11053 |
| EDRF1      | -0.11053 |
| AC073389.1 | -0.11056 |
| TAF1       | -0.11058 |
| SPTSSA     | -0.11059 |
| MARF1      | -0.1106  |
| CAPNS2     | -0.11061 |
| KLHL24     | -0.11064 |
| NDOR1      | -0.11065 |
| HMGN3      | -0.11075 |
| TTC31      | -0.11079 |
| TEPSIN     | -0.11084 |
| DDX39B     | -0.11089 |
| CNTN6      | -0.1109  |
| AL049840.4 | -0.11101 |
| PIGH       | -0.11104 |
| RTN4IP1    | -0.11107 |
| ORM2       | -0.11112 |
| MICE       | -0.11113 |
| GALNT14    | -0.11113 |
| TBX2       | -0.11115 |
| PPP1R21    | -0.11118 |
| AC046143.2 | -0.11118 |
| AC073046.1 | -0.1112  |
| RPS4XP6    | -0.1112  |
| PFKFB2     | -0.1112  |
| AC002091.1 | -0.11122 |
| USP37      | -0.11124 |
| OFD1       | -0.11127 |
| ZNF510     | -0.11127 |
| ZNF32      | -0.11135 |
| SAP30L     | -0.11141 |
| SS18       | -0.11152 |
| PPM1D      | -0.11155 |
| NT5C3A     | -0.11159 |
| COX7B      | -0.1116  |
| ZNF815P    | -0.1116  |
| YBX2       | -0.11161 |

|              |          |
|--------------|----------|
| MORN2        | -0.11165 |
| CFAP36       | -0.11169 |
| DICER1       | -0.1117  |
| NEK8         | -0.1117  |
| PLCB4        | -0.11171 |
| LINC01770    | -0.11174 |
| MAP3K3       | -0.11181 |
| PAXBP1       | -0.11186 |
| KIAA1671-AS1 | -0.11186 |
| MARCHF8      | -0.11187 |
| LUC7L3       | -0.11188 |
| AC113935.1   | -0.11193 |
| AC091849.2   | -0.11195 |
| NDUFA1       | -0.11199 |
| ZBED2        | -0.112   |
| GGCX         | -0.11207 |
| ZNF678       | -0.11211 |
| ZNF85        | -0.11212 |
| PCDHB15      | -0.11219 |
| AC007342.4   | -0.1122  |
| CNST         | -0.1122  |
| FAM222A      | -0.11221 |
| DDTL         | -0.11225 |
| SENP6        | -0.11226 |
| GNE          | -0.11228 |
| SLC15A2      | -0.1123  |
| CTSO         | -0.1123  |
| NR2F1        | -0.1124  |
| ZNF780A      | -0.11242 |
| SLC24A3      | -0.11245 |
| ZNF566       | -0.11248 |
| CNRIP1       | -0.11249 |
| STIM2-AS1    | -0.11254 |
| TMEM106A     | -0.1126  |
| IGKV1D-42    | -0.11263 |
| MTM1         | -0.11264 |
| NDUFAF5      | -0.11265 |
| DCAF10       | -0.1127  |
| KLHL36       | -0.11275 |
| THCAT158     | -0.11276 |
| ZNF839       | -0.11279 |
| GAB1         | -0.11281 |
| MGAT5        | -0.11286 |
| PDGFRA       | -0.1129  |
| SGIP1        | -0.11292 |
| FBXO6        | -0.11298 |
| TMEM138      | -0.11303 |
| SLC38A1      | -0.11304 |
| MTG1         | -0.11309 |

|            |          |
|------------|----------|
| IQCK       | -0.11322 |
| PIGA       | -0.11327 |
| BCL2L11    | -0.11328 |
| ARRDC1-AS1 | -0.1133  |
| ABCA12     | -0.1134  |
| RGS19      | -0.1134  |
| CD302      | -0.11342 |
| IFNAR1     | -0.11344 |
| SGF29      | -0.11352 |
| CHORDC1    | -0.11358 |
| LHFPL2     | -0.1136  |
| CEP135     | -0.11361 |
| ABCA7      | -0.11375 |
| KRBOX4     | -0.11377 |
| GRK2       | -0.11377 |
| AC022150.2 | -0.11378 |
| AC126474.2 | -0.11385 |
| ARID5B     | -0.11386 |
| MRPS31     | -0.11388 |
| ANKRD54    | -0.11393 |
| AC015813.1 | -0.11396 |
| TESK2      | -0.11404 |
| AQP5       | -0.11414 |
| ZNF419     | -0.11414 |
| RMDN2      | -0.11416 |
| LINC01881  | -0.11417 |
| AC093726.1 | -0.11419 |
| WDR19      | -0.11427 |
| ARSG       | -0.11433 |
| KLHL9      | -0.11433 |
| ARHGEF25   | -0.11434 |
| TMEM205    | -0.11436 |
| SBF2       | -0.11442 |
| NDUFB1     | -0.11447 |
| PRRT3      | -0.1145  |
| DTNBP1     | -0.1145  |
| DUS2       | -0.11452 |
| DDIT3      | -0.11453 |
| TRIM14     | -0.11453 |
| AP003390.1 | -0.11459 |
| AC139887.1 | -0.11464 |
| RNASEK     | -0.11471 |
| SYT1       | -0.11472 |
| FRY        | -0.11474 |
| DDR2       | -0.11476 |
| COL13A1    | -0.11482 |
| TAPBP      | -0.11488 |
| HIC1       | -0.11491 |
| AP000866.2 | -0.11495 |

|            |          |
|------------|----------|
| RPS20P33   | -0.11499 |
| TNFRSF10C  | -0.11503 |
| LBX2-AS1   | -0.11506 |
| ZNF652     | -0.1151  |
| ZNF132     | -0.11514 |
| CSKMT      | -0.11515 |
| USP9Y      | -0.11518 |
| MAP4K5     | -0.11521 |
| HOXB6      | -0.11521 |
| ABCB10     | -0.11526 |
| RNGTT      | -0.1153  |
| BRDT       | -0.11534 |
| WDR31      | -0.11537 |
| PARAL1     | -0.11539 |
| SLC14A2    | -0.1154  |
| WIP1       | -0.11542 |
| KANK1      | -0.11542 |
| FAM216A    | -0.11545 |
| CNDP2      | -0.11545 |
| NFX1       | -0.11549 |
| NCF2       | -0.11551 |
| FAM189A2   | -0.11555 |
| ANKRD6     | -0.11556 |
| LZTFL1     | -0.1156  |
| HPGDS      | -0.11561 |
| PCSK7      | -0.11566 |
| ZNF721     | -0.11568 |
| AC003965.2 | -0.11573 |
| AL360181.2 | -0.11576 |
| ABLIM1     | -0.11588 |
| MIR25      | -0.11589 |
| PHF7       | -0.11591 |
| AC100861.1 | -0.11592 |
| GUSBP1     | -0.11596 |
| RPL23P2    | -0.11596 |
| TAF1C      | -0.11599 |
| PGBD5      | -0.11601 |
| ALG13      | -0.11602 |
| WDR90      | -0.11603 |
| AGO2       | -0.11603 |
| TPRG1      | -0.11607 |
| SPATA20P1  | -0.11613 |
| DPH7       | -0.11622 |
| HSP90B1    | -0.11623 |
| APBB3      | -0.11634 |
| FUZ        | -0.11635 |
| AC024361.1 | -0.11635 |
| THOC1      | -0.11638 |
| RNF207-AS1 | -0.11642 |



|            |          |
|------------|----------|
| AP000577.1 | -0.11643 |
| E2F2       | -0.11643 |
| AC005083.1 | -0.11648 |
| ACVRL1     | -0.1165  |
| MAGI2      | -0.11654 |
| ABCC4      | -0.11656 |
| EEA1       | -0.11663 |
| FCGR2A     | -0.11675 |
| ZNF34      | -0.11684 |
| SLC9A6     | -0.11684 |
| CTSB       | -0.11685 |
| CLEC14A    | -0.11692 |
| HAUS1      | -0.11692 |
| AC007405.3 | -0.11693 |
| MRPS31P4   | -0.11698 |
| NUAK2      | -0.11709 |
| AC006238.1 | -0.11714 |
| FICD       | -0.1172  |
| ATR        | -0.11724 |
| SDHAF1     | -0.11731 |
| HELZ       | -0.11738 |
| TMEM38B    | -0.11739 |
| PDCD5      | -0.11744 |
| NIPAL2     | -0.1175  |
| PILRB      | -0.11752 |
| FTCDNL1    | -0.11758 |
| AGPAT4     | -0.1176  |
| KLF8       | -0.11761 |
| EXOC6      | -0.11762 |
| ALOX12-AS1 | -0.11762 |
| BMP3       | -0.11763 |
| CYP20A1    | -0.11764 |
| TBILA      | -0.11765 |
| RPS6P25    | -0.1177  |
| HS6ST1     | -0.11772 |
| ZCCHC7     | -0.11775 |
| AP003068.1 | -0.11775 |
| BCL6       | -0.11791 |
| RCL1       | -0.11792 |
| NPR2       | -0.11794 |
| CERT1      | -0.11804 |
| TSPAN12    | -0.11809 |
| GEN1       | -0.11812 |
| SLC25A12   | -0.11813 |
| LACTB      | -0.11814 |
| ILKAP      | -0.11815 |
| AC015712.1 | -0.11815 |
| GKAP1      | -0.11819 |
| WASHC2A    | -0.11826 |

|            |          |
|------------|----------|
| CHKB-DT    | -0.11831 |
| PFKP-DT    | -0.11835 |
| KIAA0513   | -0.11837 |
| MAP9       | -0.11839 |
| BRAF       | -0.11842 |
| DECR1      | -0.11842 |
| WDR25      | -0.11845 |
| CTIF       | -0.11851 |
| UHRF1BP1L  | -0.11853 |
| ADM2       | -0.11854 |
| TRPC1      | -0.11858 |
| CSGALNACT2 | -0.11859 |
| ZNF211     | -0.11866 |
| LINC00663  | -0.11868 |
| AC006449.2 | -0.1187  |
| TMEM30BP1  | -0.11872 |
| LINC02615  | -0.11874 |
| PCTP       | -0.11875 |
| PPP1R3D    | -0.11877 |
| P2RY11     | -0.11879 |
| WASH9P     | -0.1188  |
| FKBP15     | -0.11882 |
| AC002398.1 | -0.11883 |
| AP001830.1 | -0.11889 |
| MIR647     | -0.1189  |
| ZBTB26     | -0.11892 |
| PAXIP1-DT  | -0.11894 |
| AC004069.1 | -0.11901 |
| REX1BD     | -0.11907 |
| CXorf38    | -0.11915 |
| AC138696.2 | -0.11919 |
| HOXB3      | -0.11923 |
| PEX2       | -0.11931 |
| FABP6      | -0.11932 |
| PPP1R9A    | -0.11936 |
| PJK        | -0.11937 |
| SFT2D2     | -0.11937 |
| SLC18A2    | -0.11951 |
| UBE2Q2P1   | -0.11951 |
| AC048382.2 | -0.11952 |
| H2BU1      | -0.11958 |
| HLA-K      | -0.11959 |
| ELF5       | -0.11963 |
| USP34      | -0.11965 |
| TRIM35     | -0.11966 |
| AC090198.1 | -0.11966 |
| GCDH       | -0.11967 |
| AP000240.1 | -0.11968 |
| AKAP6      | -0.11968 |

|            |          |
|------------|----------|
| THTPA      | -0.11969 |
| ATXN7      | -0.11972 |
| WASHC2C    | -0.11976 |
| RANBP17    | -0.11982 |
| ACTL10     | -0.11983 |
| AC145423.2 | -0.11994 |
| GMFB       | -0.11994 |
| PCSK4      | -0.11996 |
| FZD6       | -0.12003 |
| S100PBP    | -0.12008 |
| ZEB1-AS1   | -0.1201  |
| AC004596.1 | -0.12011 |
| TULP4      | -0.12014 |
| HSPB8      | -0.12017 |
| ZNF280D    | -0.12028 |
| TMEM135    | -0.12029 |
| DENND4B    | -0.12038 |
| ILF3-DT    | -0.12039 |
| PCGF5      | -0.12043 |
| CALHM2     | -0.12066 |
| RHOB       | -0.12072 |
| RNF144B    | -0.12079 |
| PARP12     | -0.1208  |
| JMJD1C     | -0.12082 |
| AC105206.2 | -0.12085 |
| STX19      | -0.12088 |
| RNF31      | -0.12091 |
| ZNF41      | -0.12092 |
| NFIA       | -0.12096 |
| PET100     | -0.12096 |
| LINC00865  | -0.12098 |
| ELAC1      | -0.12098 |
| CD274      | -0.12099 |
| ZDHHC17    | -0.12099 |
| ZNRD2-AS1  | -0.12101 |
| KIAA0930   | -0.12103 |
| DAB2       | -0.12108 |
| ARL13B     | -0.12111 |
| AFF1       | -0.12114 |
| SH3RF3     | -0.12116 |
| ATP11C     | -0.12118 |
| AL365330.1 | -0.12125 |
| INPP5E     | -0.12142 |
| PPIP5K2    | -0.12145 |
| THSD1      | -0.12146 |
| ENHO       | -0.12148 |
| AC141930.1 | -0.12149 |
| BORCS6     | -0.12157 |
| MFSD8      | -0.12159 |

|            |          |
|------------|----------|
| B9D1       | -0.12168 |
| MYCT1      | -0.12169 |
| LAIR2      | -0.12171 |
| FAAH2      | -0.12172 |
| RNF113A    | -0.12172 |
| FBXO31     | -0.12175 |
| POLK       | -0.12177 |
| AC011498.7 | -0.12182 |
| AC108488.1 | -0.12195 |
| PTPN2      | -0.12196 |
| ZMYM6      | -0.12202 |
| STX7       | -0.12205 |
| SLC16A14   | -0.12205 |
| C14orf132  | -0.12213 |
| YAF2       | -0.12217 |
| PLXDC2     | -0.12221 |
| ORM1       | -0.12233 |
| TTC7B      | -0.12237 |
| PTCSC3     | -0.12238 |
| AC018638.2 | -0.1224  |
| PDLIM1     | -0.12241 |
| ATF7IP     | -0.12241 |
| AC018638.5 | -0.12242 |
| ROBO3      | -0.12258 |
| ARMC9      | -0.12258 |
| LINC00662  | -0.12263 |
| AHCYL2     | -0.12267 |
| ZNF518A    | -0.12268 |
| RASAL1     | -0.12271 |
| CBR4       | -0.12275 |
| AC002470.1 | -0.12282 |
| AL391422.4 | -0.12284 |
| ABCG1      | -0.12285 |
| UBE2Q1-AS1 | -0.12295 |
| IFT46      | -0.12299 |
| SEC63P1    | -0.12302 |
| CCDC163    | -0.12302 |
| MMRN2      | -0.12309 |
| CBR3-AS1   | -0.12311 |
| GLI1       | -0.12311 |
| AL031282.2 | -0.12313 |
| GCC2       | -0.1232  |
| AC132872.3 | -0.12321 |
| TMEM63A    | -0.12325 |
| OIT3       | -0.12327 |
| EPC1       | -0.12332 |
| ZNF222     | -0.12332 |
| RAB15      | -0.12343 |
| FAS        | -0.12351 |

|              |          |
|--------------|----------|
| ALDH1A3      | -0.12359 |
| SLC16A11     | -0.1236  |
| CDH5         | -0.12384 |
| ZNF558       | -0.12386 |
| PANK3        | -0.12387 |
| OTULINL      | -0.12402 |
| SLC66A1L     | -0.12402 |
| PHEX         | -0.12409 |
| ISCU         | -0.1242  |
| TIMM9        | -0.12422 |
| AC007342.5   | -0.12422 |
| ZNF438       | -0.12425 |
| MRAP2        | -0.12431 |
| ARHGAP39     | -0.12432 |
| QTRT1        | -0.12444 |
| TIMM10       | -0.1245  |
| LINC02489    | -0.12454 |
| ABHD13       | -0.12463 |
| PLRG1        | -0.12466 |
| AC108673.3   | -0.12467 |
| SVEP1        | -0.12473 |
| MARCO        | -0.12477 |
| SDHAP3       | -0.12478 |
| UBE2V1       | -0.12488 |
| TRAF3        | -0.12489 |
| RIDA         | -0.1249  |
| NAA40        | -0.12491 |
| AC068987.3   | -0.12492 |
| NECAP2       | -0.12492 |
| BBC3         | -0.125   |
| TMX1         | -0.1251  |
| PCNX4        | -0.1251  |
| STXBP4       | -0.12512 |
| AL139287.1   | -0.12519 |
| FAM76B       | -0.12521 |
| AC109322.1   | -0.12527 |
| PGPEP1       | -0.12528 |
| KCNE4        | -0.1253  |
| RN7SL574P    | -0.12535 |
| ERICD        | -0.12542 |
| WDSUB1       | -0.12544 |
| CHMP7        | -0.12546 |
| EXOSC3       | -0.1255  |
| SNRNP70      | -0.12563 |
| ZHX1-C8orf76 | -0.12564 |
| IGHV1-14     | -0.1257  |
| NAT1         | -0.12572 |
| CCDC117      | -0.12576 |
| AC008763.1   | -0.12588 |

|            |          |
|------------|----------|
| RASL12     | -0.12588 |
| SREK1      | -0.12608 |
| NEK9       | -0.1261  |
| LONRF2     | -0.12613 |
| TPCN2      | -0.12619 |
| MARCHF9    | -0.12622 |
| SLC36A1    | -0.12627 |
| ANKRD13A   | -0.12628 |
| AL035071.1 | -0.12632 |
| NFKB1      | -0.12637 |
| VPS13B-DT  | -0.12639 |
| PSMC6      | -0.12643 |
| AL135818.2 | -0.12644 |
| FNIP1      | -0.12645 |
| EPS15      | -0.12646 |
| AC090617.5 | -0.12648 |
| THAP6      | -0.12649 |
| AC245140.2 | -0.12649 |
| LYRM9      | -0.12649 |
| LPIN2      | -0.1265  |
| SLC25A28   | -0.12652 |
| KIF3A      | -0.12655 |
| DBP        | -0.12663 |
| MARS1      | -0.12669 |
| FKBP5      | -0.1267  |
| FGG        | -0.12671 |
| AL355355.2 | -0.12672 |
| SNHG9      | -0.12675 |
| HESX1      | -0.12682 |
| MIR3153    | -0.12682 |
| SLC39A8    | -0.12683 |
| ZNF559     | -0.12684 |
| ANKRD22    | -0.12684 |
| ARF6       | -0.1269  |
| JRK        | -0.12691 |
| DUSP8P5    | -0.12692 |
| PLPPR4     | -0.12695 |
| ANKRD26    | -0.12696 |
| AP001432.1 | -0.12697 |
| PSAP       | -0.12698 |
| EIF4HP2    | -0.12698 |
| PPARGC1A   | -0.127   |
| AP001052.1 | -0.12701 |
| CACNA2D4   | -0.12707 |
| GGA1       | -0.12708 |
| GPR199P    | -0.1271  |
| HOXA-AS2   | -0.12716 |
| TTC26      | -0.12717 |
| IFT172     | -0.12717 |

|            |          |
|------------|----------|
| INSIG1     | -0.12718 |
| MIR3176    | -0.12718 |
| AC024909.1 | -0.1273  |
| NCOA2      | -0.12731 |
| AL162586.1 | -0.12736 |
| AC008035.1 | -0.12737 |
| ATAD2B     | -0.12739 |
| MAP10      | -0.12746 |
| ZSWIM5     | -0.12748 |
| C3orf62    | -0.1275  |
| ZNF227     | -0.1275  |
| C10orf95   | -0.12754 |
| TEPP       | -0.1276  |
| C2CD2L     | -0.12761 |
| UQCRFS1    | -0.12763 |
| SLC47A1    | -0.12768 |
| AL591895.1 | -0.12776 |
| PSD        | -0.12777 |
| SCAF11     | -0.12779 |
| FCGR3B     | -0.12783 |
| TTC39A-AS1 | -0.1279  |
| METTL22    | -0.12791 |
| CENATAC-DT | -0.12796 |
| CBY1       | -0.12797 |
| ZNF699     | -0.12801 |
| C19orf44   | -0.12802 |
| FBXO16     | -0.12807 |
| AC007842.1 | -0.1281  |
| SAMD12-AS1 | -0.1281  |
| RAB24      | -0.12811 |
| ME3        | -0.12812 |
| ANKRD46    | -0.12814 |
| INSR       | -0.12817 |
| ARL6IP4    | -0.1282  |
| LINC01287  | -0.12828 |
| RSPO4      | -0.12832 |
| RANBP6     | -0.12832 |
| MPND       | -0.12835 |
| SLC25A19   | -0.12836 |
| RNY4P10    | -0.12838 |
| TPST2      | -0.1284  |
| HECTD1     | -0.12841 |
| TUSC3      | -0.12845 |
| TMEM243    | -0.12847 |
| AC011450.1 | -0.12856 |
| NFATC2IP   | -0.12856 |
| SPACA6     | -0.12863 |
| RAPGEF5    | -0.12863 |
| TRIT1      | -0.12867 |

|             |          |
|-------------|----------|
| STING1      | -0.1287  |
| EPB41L4A-DT | -0.12872 |
| LPCAT2      | -0.12879 |
| MIR4635     | -0.12881 |
| STRN3       | -0.12882 |
| RHPN1       | -0.12892 |
| FAM126A     | -0.12899 |
| USP15       | -0.129   |
| SOCS3       | -0.12906 |
| PLA2G12B    | -0.12906 |
| NUCB2       | -0.12916 |
| FMR1        | -0.12919 |
| ZNF688      | -0.1292  |
| VCP1P1      | -0.12921 |
| EFCAB7      | -0.12922 |
| PI4K2B      | -0.12924 |
| KNTC1       | -0.12929 |
| TBX5-AS1    | -0.12941 |
| GYG1        | -0.12953 |
| SAMD4A      | -0.12957 |
| MS4A15      | -0.12966 |
| ARAP1       | -0.12985 |
| LTO1        | -0.12995 |
| H2AJ        | -0.12997 |
| NOL12       | -0.12998 |
| ATG14       | -0.13006 |
| C14orf119   | -0.13007 |
| AFDN-DT     | -0.13015 |
| ZNF10       | -0.13025 |
| SDR42E1     | -0.13026 |
| ZDHHC8P1    | -0.13027 |
| MGAT1       | -0.13043 |
| AC007114.1  | -0.13051 |
| ZNF789      | -0.13055 |
| CHST7       | -0.13063 |
| ATRX        | -0.13065 |
| PLEKHB1     | -0.13066 |
| ARAP2       | -0.13068 |
| PDE6B       | -0.13071 |
| MTMR6       | -0.13072 |
| APBB1       | -0.13078 |
| MADD        | -0.13088 |
| USPL1       | -0.13092 |
| AC008736.1  | -0.13094 |
| MX2         | -0.13098 |
| STS         | -0.131   |
| BIRC6       | -0.13102 |
| DYNLT1      | -0.13104 |
| SLC35E3     | -0.13106 |



|            |          |
|------------|----------|
| TRMT13     | -0.13108 |
| FUT1       | -0.13117 |
| ARHGEF3    | -0.13124 |
| PLSCR1     | -0.13127 |
| IQCB1      | -0.13129 |
| CLCN5      | -0.13133 |
| SLC27A5    | -0.13138 |
| NFYB       | -0.13138 |
| CYBC1      | -0.1314  |
| TPSP2      | -0.13141 |
| CD70       | -0.13143 |
| MIR4728    | -0.13152 |
| TMEM251    | -0.13155 |
| RAB4B      | -0.13161 |
| MAPK8IP2   | -0.13168 |
| MDP1       | -0.13181 |
| RALGPS2    | -0.13188 |
| PUS10      | -0.13194 |
| KCNJ15     | -0.13195 |
| ICAM2      | -0.13202 |
| ZNF620     | -0.13214 |
| SMC5-AS1   | -0.13217 |
| ATG4A      | -0.13221 |
| PRKD1      | -0.13222 |
| KHK        | -0.13223 |
| SCN9A      | -0.13224 |
| TNFAIP8L3  | -0.13224 |
| IKBKB      | -0.13229 |
| ACIN1      | -0.13235 |
| ACER3      | -0.13242 |
| BCLAF3     | -0.13253 |
| RNU6-529P  | -0.13255 |
| C1GALT1C1L | -0.1326  |
| SWSAP1     | -0.13262 |
| ACVR2A     | -0.13271 |
| MPP7       | -0.13276 |
| SBK1       | -0.13277 |
| AL139246.5 | -0.13278 |
| MSH5       | -0.13278 |
| TTC28-AS1  | -0.13281 |
| ZC3H7A     | -0.13284 |
| ABI2       | -0.13286 |
| ERV3-1     | -0.13292 |
| STK32A     | -0.13312 |
| ZNF383     | -0.13326 |
| GAS6       | -0.13326 |
| AC009041.3 | -0.13328 |
| MT-RNR1    | -0.13328 |
| METTL17    | -0.1333  |

|            |          |
|------------|----------|
| HSBP1      | -0.13334 |
| TMEM170B   | -0.13337 |
| TFB1M      | -0.13338 |
| ITSN2      | -0.1334  |
| MSANTD2    | -0.13341 |
| MPP6       | -0.13341 |
| DDX11L2    | -0.13346 |
| ZNF543     | -0.13352 |
| RNASEH2B   | -0.13359 |
| MTCO1P53   | -0.1336  |
| ZNF580     | -0.13363 |
| CXCL1      | -0.13367 |
| ELK4       | -0.1337  |
| TRAPPC8    | -0.13376 |
| TNIK       | -0.13379 |
| AC009065.8 | -0.13388 |
| RNF169     | -0.13389 |
| FAR1       | -0.13391 |
| ZNF37A     | -0.13392 |
| CIT        | -0.13393 |
| CCDC125    | -0.134   |
| ZFX        | -0.13402 |
| RNF150     | -0.13403 |
| ABHD18     | -0.13409 |
| DPY19L1P1  | -0.13412 |
| MRTFB      | -0.13418 |
| SCGB1B2P   | -0.13423 |
| PLAC9      | -0.13431 |
| ARFGEF1    | -0.13433 |
| MTDH       | -0.13433 |
| PLCG1      | -0.13434 |
| AC132008.2 | -0.13435 |
| URAHP      | -0.13435 |
| SULT1C2    | -0.1344  |
| EID3       | -0.13441 |
| ZNF773     | -0.13443 |
| CLSTN3     | -0.13444 |
| ZNF792     | -0.13454 |
| SAMD12     | -0.13457 |
| LAPTM4B    | -0.13459 |
| CEP78      | -0.13463 |
| FAM161A    | -0.13466 |
| PARVB      | -0.13468 |
| RHBDD1     | -0.1347  |
| MINDY3     | -0.1347  |
| CABLES1    | -0.13485 |
| ERBB2      | -0.1349  |
| RPL9P32    | -0.13493 |
| WASHC4     | -0.13494 |

|            |          |
|------------|----------|
| PRKAA2     | -0.13495 |
| LINC01290  | -0.13506 |
| PPM1A      | -0.13528 |
| LY6G5B     | -0.13534 |
| AC079922.2 | -0.13534 |
| AC004771.2 | -0.13547 |
| MIR23B     | -0.13556 |
| FBP1       | -0.13556 |
| RNU6-882P  | -0.13559 |
| AC018638.4 | -0.13561 |
| LINC01004  | -0.13561 |
| PPFIBP2    | -0.13561 |
| APOBEC3B   | -0.13566 |
| C17orf49   | -0.13566 |
| ZNF516     | -0.13572 |
| ODF2L      | -0.13575 |
| DOCK9-DT   | -0.13576 |
| KLF6       | -0.13583 |
| PHIP       | -0.13584 |
| GRAMD1A    | -0.13596 |
| SCNN1D     | -0.13599 |
| HECTD2     | -0.13602 |
| MYO18A     | -0.13607 |
| COX6C      | -0.13609 |
| CA13       | -0.13614 |
| PGAP3      | -0.13616 |
| ATAD5      | -0.13621 |
| RPS29      | -0.13626 |
| CEP350     | -0.13631 |
| LINC01852  | -0.13636 |
| AC005726.1 | -0.13638 |
| LAMP3      | -0.13639 |
| THAP12     | -0.13642 |
| PYCARD     | -0.13648 |
| ASCL5      | -0.13651 |
| AC103957.2 | -0.1367  |
| NSUN5P1    | -0.13672 |
| FAM135A    | -0.13672 |
| AP001434.1 | -0.13676 |
| ATP6V0E2   | -0.13678 |
| ZNF790-AS1 | -0.13679 |
| ARHGAP31   | -0.13686 |
| ZNF514     | -0.13688 |
| RBM23      | -0.13695 |
| PRODH      | -0.13697 |
| LINC00174  | -0.13698 |
| CEBPD      | -0.13705 |
| CPEB4      | -0.13706 |
| CCNL2      | -0.13714 |

|            |          |
|------------|----------|
| YTHDC2     | -0.13719 |
| IFI27L2    | -0.1372  |
| KCTD17     | -0.13721 |
| AC093388.1 | -0.13726 |
| LRRC73     | -0.13727 |
| COA5       | -0.13729 |
| HSCB       | -0.1373  |
| LINC00667  | -0.13734 |
| EIF4A1     | -0.13738 |
| UNC13B     | -0.13747 |
| SCFD1      | -0.13748 |
| AC116913.1 | -0.13752 |
| NR2C2      | -0.13753 |
| HELLS      | -0.13755 |
| UXT        | -0.13756 |
| TMEM80     | -0.13763 |
| SPCS3      | -0.13765 |
| ARHGEF10L  | -0.13765 |
| RAD52      | -0.13767 |
| DGKG       | -0.1377  |
| SEPTIN7P2  | -0.13771 |
| POLR2I     | -0.13772 |
| RHOG       | -0.13776 |
| RPS29P5    | -0.13785 |
| CDKN1B     | -0.13786 |
| MCCC1-AS1  | -0.13788 |
| ANKRD33B   | -0.13792 |
| GJA4       | -0.13798 |
| TENT2      | -0.13813 |
| PHC1       | -0.13815 |
| SUN2       | -0.13817 |
| CBLB       | -0.13819 |
| PLXNA2     | -0.1382  |
| NBEA       | -0.13821 |
| ABCC6      | -0.13823 |
| RANGRF     | -0.13827 |
| NRDE2      | -0.13828 |
| IRF7       | -0.13829 |
| SLAIN1     | -0.13829 |
| IRX1       | -0.13832 |
| HNRNPH1    | -0.13833 |
| SRGN       | -0.13836 |
| CD200      | -0.13838 |
| ALOX5AP    | -0.13841 |
| BRCA2      | -0.13842 |
| RRN3P3     | -0.13852 |
| AC026471.1 | -0.13853 |
| CENATAC    | -0.13857 |
| FREM2      | -0.13858 |

|             |          |
|-------------|----------|
| SOS2        | -0.13866 |
| FLJ37453    | -0.13867 |
| BIN3        | -0.1387  |
| KMT2C       | -0.13877 |
| ZHX2        | -0.13885 |
| NUTM2B-AS1  | -0.13886 |
| DUBR        | -0.13888 |
| DGAT2       | -0.13891 |
| NBPF11      | -0.13893 |
| ITPKB       | -0.13897 |
| CEP192      | -0.13899 |
| AL031673.1  | -0.13901 |
| SOBP        | -0.13907 |
| AL445187.1  | -0.1391  |
| MAST4-AS1   | -0.13913 |
| SH2B1       | -0.13915 |
| CDK5RAP3    | -0.13916 |
| CCSER1      | -0.13918 |
| HELQ        | -0.13919 |
| FAM171A1    | -0.13921 |
| LINC01963   | -0.13935 |
| CLASRP      | -0.13936 |
| SASH1       | -0.13937 |
| IGSF9B      | -0.13941 |
| AAK1        | -0.13947 |
| OTULIN      | -0.13953 |
| ATF4        | -0.13956 |
| C1QTNF1     | -0.13957 |
| TRIM38      | -0.13966 |
| RFX7        | -0.13969 |
| FHDC1       | -0.1397  |
| ZNF141      | -0.13972 |
| INPP5J      | -0.13973 |
| SLC25A5-AS1 | -0.13975 |
| VPS37A      | -0.13975 |
| CRBN        | -0.13979 |
| TBC1D31     | -0.13987 |
| AC018690.1  | -0.13989 |
| WFDC21P     | -0.13994 |
| STAT2       | -0.13996 |
| DNAAF2      | -0.13999 |
| ZBTB48      | -0.13999 |
| DIPK2A      | -0.14    |
| AC061992.2  | -0.14002 |
| RPL39P16    | -0.14003 |
| RBM25       | -0.14004 |
| AC010618.2  | -0.14008 |
| EMSY        | -0.14011 |
| GALC        | -0.14018 |

|            |          |
|------------|----------|
| AC004951.2 | -0.14018 |
| TRPS1      | -0.14019 |
| B3GNT7     | -0.14021 |
| SLC39A6    | -0.14021 |
| OLFM1      | -0.14026 |
| AP002360.1 | -0.14028 |
| AL031282.1 | -0.14034 |
| ZNF814     | -0.14038 |
| KANSL1-AS1 | -0.14049 |
| AC083880.1 | -0.14054 |
| DENND1B    | -0.14057 |
| PPP3CB-AS1 | -0.14057 |
| PLA2R1     | -0.14067 |
| ATP8B1     | -0.14068 |
| SMOC2      | -0.14069 |
| AC245297.1 | -0.14071 |
| LINC01224  | -0.14082 |
| PNRC1      | -0.14082 |
| TOB1-AS1   | -0.14087 |
| SHE        | -0.14088 |
| SPAAR      | -0.14089 |
| AC022144.1 | -0.14096 |
| AC040977.1 | -0.14104 |
| BDP1       | -0.1411  |
| AL031727.1 | -0.14111 |
| FMO4       | -0.14111 |
| GJA5       | -0.14113 |
| AL021878.2 | -0.14117 |
| SCTR       | -0.14126 |
| SYNGR3     | -0.14127 |
| DYNLT2B    | -0.14132 |
| SHROOM4    | -0.14142 |
| C2orf49-DT | -0.14145 |
| NKX2-8     | -0.14146 |
| LFNG       | -0.14149 |
| DENND1A    | -0.1415  |
| MED27      | -0.14152 |
| CRYBB2P1   | -0.14153 |
| WASF3      | -0.14153 |
| CD24P4     | -0.14159 |
| RBM15      | -0.14163 |
| ARFGEF3    | -0.14166 |
| DNAJC27    | -0.14167 |
| GTF3A      | -0.14172 |
| MYEF2      | -0.14176 |
| ZNF26      | -0.1418  |
| CREBZF     | -0.14197 |
| SYTL2      | -0.14211 |
| ATP6V0A2   | -0.14211 |

|             |          |
|-------------|----------|
| TFEB        | -0.14217 |
| MACF1       | -0.1422  |
| ZNF248      | -0.14223 |
| DBI         | -0.14224 |
| SARDH       | -0.14237 |
| EMILIN1     | -0.14248 |
| HOMEZ       | -0.1425  |
| C4B         | -0.14251 |
| CREBL2      | -0.14251 |
| AL445645.1  | -0.14261 |
| MFSD4B      | -0.14264 |
| SOCS2-AS1   | -0.14264 |
| METTL4      | -0.14266 |
| HEXD        | -0.14275 |
| WDR35       | -0.14278 |
| RBM39       | -0.14279 |
| BIRC3       | -0.14281 |
| AP003352.1  | -0.14284 |
| SLC36A4     | -0.14288 |
| AP004609.3  | -0.14291 |
| ZNF808      | -0.14298 |
| EZH1        | -0.14301 |
| LMF1        | -0.14304 |
| SDHAP1      | -0.14307 |
| HYKK        | -0.14309 |
| AC004812.2  | -0.1432  |
| MAP1LC3A    | -0.14323 |
| LINC02866   | -0.14329 |
| AC006547.1  | -0.14331 |
| WNT10A      | -0.14331 |
| ZC3H8       | -0.14337 |
| VMP1        | -0.14338 |
| ST3GAL5-AS1 | -0.14339 |
| DACH1       | -0.1434  |
| EDNRB       | -0.14343 |
| AC009812.1  | -0.14347 |
| STIMATE     | -0.14349 |
| FRMD4A      | -0.14356 |
| BRWD1-AS2   | -0.14359 |
| MIR4482     | -0.1436  |
| IFT27       | -0.1436  |
| TMEM175     | -0.14364 |
| AL355574.1  | -0.14368 |
| PAN2        | -0.14374 |
| MSL2        | -0.14375 |
| COL4A3      | -0.14375 |
| MIR765      | -0.14379 |
| TIA1        | -0.14379 |
| MCF2L       | -0.1438  |

|            |          |
|------------|----------|
| IFI27L1    | -0.14384 |
| PRICKLE2   | -0.14384 |
| SLC29A4    | -0.14385 |
| LRCH1      | -0.1439  |
| RPL21P28   | -0.14392 |
| CHAC1      | -0.14393 |
| ZDHHHC13   | -0.14393 |
| AC016739.1 | -0.14396 |
| AL049872.1 | -0.14397 |
| ALDH1A2    | -0.14399 |
| HOXB-AS2   | -0.14399 |
| C2orf92    | -0.144   |
| TNFRSF11A  | -0.144   |
| OGFRL1     | -0.14401 |
| MUC12-AS1  | -0.14402 |
| GK5        | -0.14404 |
| TNNC1      | -0.14405 |
| SMPD4BP    | -0.14407 |
| PLIN5      | -0.14416 |
| AASS       | -0.14418 |
| ZNF117     | -0.14426 |
| DPYSL4     | -0.14428 |
| ALMS1      | -0.14437 |
| AC005082.1 | -0.14442 |
| ARL9       | -0.14447 |
| ZNF181     | -0.14447 |
| ZBTB5      | -0.14461 |
| ZFYVE26    | -0.14462 |
| IRF2       | -0.14466 |
| ZNF575     | -0.14468 |
| AL136531.1 | -0.14468 |
| GPRC5D     | -0.14471 |
| CYB561A3   | -0.14474 |
| GPT2       | -0.14483 |
| TLR5       | -0.14496 |
| DCLRE1C    | -0.14499 |
| NDUFA10    | -0.145   |
| BIVM       | -0.14504 |
| WASHC3     | -0.14505 |
| PRPF38B    | -0.1451  |
| C4orf33    | -0.14511 |
| GLUD1P3    | -0.14517 |
| MSTO2P     | -0.14526 |
| APIP       | -0.14543 |
| AC026367.3 | -0.14548 |
| AC114730.3 | -0.14562 |
| AC015871.3 | -0.14563 |
| AC131212.3 | -0.14565 |
| AC008438.1 | -0.14569 |



|            |          |
|------------|----------|
| HCG4B      | -0.14571 |
| ACSS1      | -0.14583 |
| AC011477.2 | -0.14587 |
| ZNF555     | -0.1459  |
| AC024075.2 | -0.14592 |
| ZNF236-DT  | -0.14607 |
| RIN3       | -0.1461  |
| PRSS21     | -0.14612 |
| C18orf21   | -0.14614 |
| FAM104B    | -0.14615 |
| ORMDL1     | -0.1463  |
| ZNF484     | -0.14632 |
| AL049840.5 | -0.14662 |
| FIG4       | -0.14664 |
| RABL2B     | -0.14672 |
| TSEN15     | -0.14672 |
| UBE2FP1    | -0.14673 |
| SYNRG      | -0.14679 |
| EFCAB2     | -0.14682 |
| SNORD19    | -0.14688 |
| PSAT1      | -0.1469  |
| RPS6KA3    | -0.14695 |
| TMEM74B    | -0.147   |
| RUSC1-AS1  | -0.14711 |
| LPAR3      | -0.14716 |
| AC016394.1 | -0.14717 |
| SNX29      | -0.14718 |
| FGF7       | -0.14723 |
| CGAS       | -0.1473  |
| AC091390.3 | -0.1473  |
| ZCCHC24    | -0.14732 |
| CEPT1      | -0.14734 |
| CAPG       | -0.14735 |
| MELTF-AS1  | -0.14736 |
| ENTPD3     | -0.14743 |
| TMEM234    | -0.14748 |
| ELP2       | -0.14749 |
| ZNF284     | -0.14753 |
| MPHOSPH9   | -0.14756 |
| TMEM144    | -0.14771 |
| RBM5       | -0.14779 |
| FAIM       | -0.14784 |
| ABCC5      | -0.14786 |
| ZNF214     | -0.14793 |
| TNFSF12    | -0.14797 |
| ZNF674-AS1 | -0.14801 |
| ATP9B      | -0.14813 |
| SHLD3      | -0.14815 |
| SPRR2C     | -0.14818 |

|            |          |
|------------|----------|
| IL17RB     | -0.14818 |
| BCO1       | -0.14825 |
| HPS1       | -0.14826 |
| ZFP57      | -0.14827 |
| AC092032.1 | -0.14828 |
| NPAT       | -0.1483  |
| ZNF720     | -0.14835 |
| CASP7      | -0.14839 |
| HAR1A      | -0.14839 |
| ZFP30      | -0.14857 |
| MZF1-AS1   | -0.14859 |
| MTMR10     | -0.14859 |
| KLHL15     | -0.14863 |
| ATXN3      | -0.14873 |
| ATP13A4    | -0.14875 |
| FOXO1      | -0.14876 |
| KRTAP5-1   | -0.14885 |
| SLC25A14   | -0.14889 |
| SNHG12     | -0.14901 |
| TCIRG1     | -0.14902 |
| DUSP19     | -0.14903 |
| MTERF3     | -0.14908 |
| WDFY2      | -0.14918 |
| HBA2       | -0.14938 |
| TENM1      | -0.14939 |
| ZNF649     | -0.14954 |
| SZT2       | -0.14955 |
| AOC2       | -0.14956 |
| RMC1       | -0.14962 |
| ARL5A      | -0.14964 |
| LSMEM1     | -0.1497  |
| CLMN       | -0.14974 |
| SNHG30     | -0.14976 |
| ERICH1     | -0.14982 |
| LINC02416  | -0.14989 |
| MFHAS1     | -0.14992 |
| TET2       | -0.15001 |
| CEP43      | -0.15013 |
| KLC1       | -0.15019 |
| KLHDC2     | -0.15027 |
| CHKA       | -0.15033 |
| ADM5       | -0.15035 |
| CCSER2     | -0.15037 |
| ZNF582     | -0.15039 |
| ABHD12     | -0.1504  |
| DUTP6      | -0.15045 |
| MBD2       | -0.1505  |
| AL162151.2 | -0.15066 |
| TMPRSS2    | -0.15072 |

|            |          |
|------------|----------|
| DTD2       | -0.15072 |
| CPEB3      | -0.15074 |
| INTS8      | -0.15076 |
| LINS1      | -0.1508  |
| ARL11      | -0.15081 |
| ZNF417     | -0.15085 |
| TMEM70     | -0.15086 |
| AC060766.1 | -0.15088 |
| SNHG1      | -0.15091 |
| TTC12      | -0.15096 |
| H4C12      | -0.15102 |
| ACAP2      | -0.1512  |
| HOTAIRM1   | -0.15128 |
| MARCKS     | -0.15129 |
| GEMIN2     | -0.15143 |
| AKAP11     | -0.15143 |
| AC020915.1 | -0.15148 |
| PPOX       | -0.15166 |
| NOTCH4     | -0.15169 |
| C11orf80   | -0.15169 |
| AC003072.1 | -0.15172 |
| MCTP1      | -0.15173 |
| PROS1      | -0.15174 |
| MTMR11     | -0.15176 |
| HEIH       | -0.15176 |
| RHOJ       | -0.15184 |
| EXOC5      | -0.15188 |
| IKBKE      | -0.15189 |
| NAPSA      | -0.15193 |
| ZFC3H1     | -0.15196 |
| MRPL45P2   | -0.15197 |
| XPR1       | -0.152   |
| MLLT6      | -0.15212 |
| AL355488.1 | -0.15214 |
| PFN1P6     | -0.15216 |
| RILPL2     | -0.15224 |
| MDM1       | -0.15226 |
| FBLN1      | -0.1523  |
| IFT74      | -0.15233 |
| HSF2       | -0.15235 |
| RNU6-37P   | -0.15239 |
| RAD9A      | -0.15239 |
| GABBR1     | -0.15246 |
| TMEM116    | -0.1525  |
| NPC2       | -0.15251 |
| TTC13      | -0.15259 |
| LINC02846  | -0.15266 |
| ELOVL7     | -0.15272 |
| STYX       | -0.15281 |

|            |          |
|------------|----------|
| AC079807.1 | -0.15292 |
| CSK        | -0.15294 |
| ANKRD18EP  | -0.15296 |
| ANAPC4     | -0.15299 |
| EPB41L4A   | -0.15319 |
| GLB1L      | -0.15321 |
| MCM3AP-AS1 | -0.15325 |
| ZZEF1      | -0.15326 |
| AFG1L      | -0.15326 |
| LCORL      | -0.15331 |
| WDFY1      | -0.15339 |
| LONRF1     | -0.1534  |
| MITD1      | -0.15342 |
| AL031717.1 | -0.15344 |
| OTUD3      | -0.1535  |
| AC138207.8 | -0.15359 |
| SMARCA2    | -0.1536  |
| CD300C     | -0.15361 |
| AP001062.1 | -0.15364 |
| B3GAT1     | -0.15379 |
| SWAP70     | -0.15381 |
| ZNF630     | -0.15385 |
| AC093249.6 | -0.15386 |
| RGS12      | -0.15392 |
| GPR146     | -0.15394 |
| AL354718.1 | -0.15399 |
| FANK1      | -0.15403 |
| TNFSF15    | -0.15405 |
| BEX1       | -0.15417 |
| ZBED5      | -0.15418 |
| PTPN4      | -0.15419 |
| ENTPD4     | -0.15425 |
| CELF2      | -0.15426 |
| CHURC1     | -0.15427 |
| NNT        | -0.1543  |
| PABPN1     | -0.15433 |
| RNF146     | -0.15444 |
| FLNB-AS1   | -0.15444 |
| AC009065.4 | -0.15445 |
| PCSK1N     | -0.15446 |
| CYP26B1    | -0.15447 |
| GON7       | -0.15447 |
| AP000648.4 | -0.15449 |
| AC004241.3 | -0.15458 |
| ASB16      | -0.1547  |
| DEF8       | -0.15473 |
| DDX39A     | -0.15477 |
| MFSD1      | -0.15477 |
| CGRRF1     | -0.15479 |

|            |          |
|------------|----------|
| FAM111A-DT | -0.15481 |
| ZNF195     | -0.15482 |
| AC080038.1 | -0.15487 |
| AL671883.2 | -0.15489 |
| ITPR1      | -0.15491 |
| ADA        | -0.15494 |
| AC096921.2 | -0.15496 |
| AC064807.1 | -0.15496 |
| CCDC18-AS1 | -0.15506 |
| EGFL6      | -0.15508 |
| SYNJ2BP    | -0.15511 |
| ZNF271P    | -0.15516 |
| AC022167.2 | -0.15516 |
| C1QTNF7    | -0.15518 |
| FOXO3      | -0.15522 |
| AL139327.1 | -0.15529 |
| AC093726.2 | -0.15533 |
| IL1R1      | -0.15535 |
| AC003973.2 | -0.15537 |
| CYGB       | -0.15538 |
| AC053527.2 | -0.15543 |
| RHOU       | -0.15549 |
| PIDD1      | -0.1555  |
| GK-IT1     | -0.15561 |
| MX1        | -0.15574 |
| ADGRE2     | -0.15578 |
| AC012645.1 | -0.15578 |
| RFTN2      | -0.15581 |
| SNORD51    | -0.15592 |
| CLHC1      | -0.15592 |
| ARL14EP    | -0.15595 |
| GALT       | -0.15598 |
| AC004980.1 | -0.15602 |
| SORBS1     | -0.15603 |
| PTPRD      | -0.15605 |
| ZNF302     | -0.15608 |
| HNRNPA1L2  | -0.15616 |
| MBP        | -0.1562  |
| TXNIP      | -0.15623 |
| RNA5SP122  | -0.15626 |
| PPWD1      | -0.15627 |
| HSPA13     | -0.15635 |
| ZNF189     | -0.15637 |
| DTX2P1     | -0.15646 |
| RRM2B      | -0.15648 |
| TMSB4XP1   | -0.15649 |
| RNU6-476P  | -0.15655 |
| OTUD1      | -0.15665 |
| COMMD3     | -0.15665 |

|            |          |
|------------|----------|
| NGDN       | -0.15671 |
| EPG5       | -0.15676 |
| ZNF572     | -0.15677 |
| C21orf91   | -0.15677 |
| AC109583.3 | -0.15678 |
| LINC02361  | -0.15688 |
| NAV2       | -0.1569  |
| CSAD       | -0.15692 |
| ANKRD65    | -0.15695 |
| ZNF225     | -0.15697 |
| STOM       | -0.157   |
| STRBP      | -0.15704 |
| LNCTAM34A  | -0.15705 |
| AKAP17A    | -0.15709 |
| RC3H1      | -0.15711 |
| MPDZ       | -0.15726 |
| ARHGAP24   | -0.15728 |
| SPNS1      | -0.15749 |
| LCAT       | -0.15773 |
| USF3       | -0.15775 |
| AC027228.2 | -0.15775 |
| GOT1       | -0.15781 |
| PLGRKT     | -0.1579  |
| GPR137B    | -0.15792 |
| LRAT       | -0.15792 |
| SH3BP5     | -0.15793 |
| DYRK2      | -0.15798 |
| RN7SL192P  | -0.15799 |
| TYK2       | -0.15811 |
| AC004918.3 | -0.15811 |
| MRI1       | -0.15813 |
| AC104461.1 | -0.15815 |
| STIM2      | -0.1582  |
| WHRN       | -0.15822 |
| MLH3       | -0.1583  |
| TRAPPC9    | -0.1583  |
| AL691482.3 | -0.15838 |
| PSD4       | -0.15838 |
| AGAP4      | -0.15838 |
| AC133552.5 | -0.15841 |
| NDRG2      | -0.15849 |
| AP002840.2 | -0.15854 |
| CRELD2     | -0.15858 |
| KLRA1P     | -0.15861 |
| ZNNT1      | -0.15862 |
| AF186192.1 | -0.15862 |
| FAM24B     | -0.15863 |
| ACAD8      | -0.15865 |
| VMO1       | -0.15868 |

|            |          |
|------------|----------|
| AL121603.2 | -0.15869 |
| TTC9       | -0.15878 |
| TNF        | -0.15878 |
| AL132656.4 | -0.15882 |
| TXNL4A     | -0.15883 |
| QKI        | -0.15885 |
| PARPBP     | -0.15887 |
| HOXC11     | -0.15888 |
| FNIP2      | -0.15888 |
| KIF17      | -0.15893 |
| EIF3EP1    | -0.15898 |
| HDAC10     | -0.159   |
| RNU1-36P   | -0.15904 |
| CYRIB      | -0.15904 |
| IPCEF1     | -0.15909 |
| AC109309.1 | -0.15919 |
| POU6F2     | -0.15935 |
| AC092919.2 | -0.15939 |
| RCAN3      | -0.15941 |
| IFI35      | -0.15943 |
| CBWD1      | -0.15944 |
| SEPSECS    | -0.15944 |
| VAMP5      | -0.15948 |
| KDM6A      | -0.15949 |
| ZNF345     | -0.15959 |
| SLC25A29   | -0.15965 |
| CALM1      | -0.15967 |
| AC021016.1 | -0.15978 |
| AGTPBP1    | -0.15987 |
| ERVK3-1    | -0.15989 |
| RAP2C-AS1  | -0.15997 |
| IL17RA     | -0.16    |
| AC046185.3 | -0.16003 |
| CRMP1      | -0.16007 |
| CEP295     | -0.16022 |
| MSI2       | -0.16023 |
| SMIM27     | -0.16027 |
| UBL7-AS1   | -0.16035 |
| LRTOMT     | -0.16042 |
| AL050309.1 | -0.16044 |
| VASH1-AS1  | -0.16046 |
| PXYLP1     | -0.16049 |
| L2HGDH     | -0.16057 |
| SLC2A13    | -0.16058 |
| RRAGB      | -0.16059 |
| COQ10A     | -0.16063 |
| CEP250     | -0.16073 |
| AC080037.2 | -0.16076 |
| ZNF799     | -0.16083 |

|              |          |
|--------------|----------|
| CPT1A        | -0.16084 |
| AC024451.2   | -0.16087 |
| H4C8         | -0.1609  |
| CIRBP        | -0.16094 |
| RBM33        | -0.16096 |
| AL031775.2   | -0.16099 |
| LINC02198    | -0.16106 |
| SIPA1L2      | -0.16108 |
| BBIP1        | -0.16113 |
| MT-ND6       | -0.16117 |
| MAX          | -0.16125 |
| CPD          | -0.16139 |
| HECTD4       | -0.16145 |
| MAPK11       | -0.1616  |
| AC011468.1   | -0.16171 |
| TBCB         | -0.16176 |
| KAT8         | -0.16179 |
| CFH          | -0.16182 |
| RBM12B       | -0.16183 |
| C15orf65     | -0.16183 |
| GASK1B       | -0.16184 |
| RHOQP1       | -0.16185 |
| KLHDC7B      | -0.16189 |
| TMX3         | -0.16195 |
| CNTNAP2      | -0.16196 |
| CXCL14       | -0.16199 |
| ARHGEF26     | -0.16199 |
| FRS2         | -0.16205 |
| TMEM161B-AS1 | -0.16209 |
| INPP4B       | -0.1621  |
| ERCC6L2      | -0.16215 |
| TBC1D24      | -0.16218 |
| LTB4R2       | -0.1622  |
| ERICH2       | -0.1622  |
| AC006504.7   | -0.16226 |
| GTF2IP23     | -0.1623  |
| FGFR4        | -0.16231 |
| AL118516.1   | -0.16233 |
| FHIT         | -0.16235 |
| MIA2         | -0.16244 |
| RASGRP4      | -0.16248 |
| AL359962.2   | -0.16252 |
| CALCRL       | -0.16257 |
| HSPA12B      | -0.16257 |
| AL118558.3   | -0.16268 |
| IZUMO4       | -0.1627  |
| TAPT1        | -0.16272 |
| PSMA6P1      | -0.16275 |
| RAB26        | -0.16281 |



|                  |          |
|------------------|----------|
| NOP56P3          | -0.16284 |
| SPRR2D           | -0.16286 |
| DNAJC9-AS1       | -0.16288 |
| AP001486.2       | -0.16289 |
| CHFR             | -0.16297 |
| DRAM2            | -0.16302 |
| PMP22            | -0.16311 |
| DCAF5            | -0.16316 |
| OSTM1            | -0.16317 |
| VCPKMT           | -0.16323 |
| LY6G5C           | -0.16338 |
| TTC21B           | -0.16338 |
| PTPN1            | -0.1634  |
| AP4B1            | -0.1634  |
| AL118558.4       | -0.16352 |
| SMIM8            | -0.16352 |
| NDST2            | -0.16352 |
| SLC9A3           | -0.1636  |
| AL031058.1       | -0.16361 |
| AC016590.3       | -0.16362 |
| AP5M1            | -0.16378 |
| ZBED6            | -0.16378 |
| IQSEC1           | -0.16386 |
| PSMA3            | -0.1639  |
| EIF1AY           | -0.16411 |
| GABPB1-AS1       | -0.16412 |
| ETV6             | -0.16414 |
| ZMYND15          | -0.16416 |
| MBNL3            | -0.16416 |
| ZFP90            | -0.16416 |
| AC018638.7       | -0.16418 |
| THAP8            | -0.1643  |
| RNF38            | -0.16432 |
| AL354707.1       | -0.16447 |
| ZYG11A           | -0.16452 |
| PDXDC2P-NPIPB14P | -0.16453 |
| SMPD2            | -0.16455 |
| ZNF14            | -0.16457 |
| DLEU2            | -0.16472 |
| SERPINI1         | -0.16479 |
| MIR559           | -0.16501 |
| CETN2            | -0.16502 |
| GTPBP1           | -0.16507 |
| ACSF3            | -0.16508 |
| LINC00476        | -0.16508 |
| ZNF79            | -0.16509 |
| GPX1P1           | -0.16512 |
| HABP4            | -0.16516 |
| SP140L           | -0.16521 |

|            |          |
|------------|----------|
| ADGRE5     | -0.16531 |
| AC084824.1 | -0.16534 |
| TRIM3      | -0.16535 |
| EPM2AIP1   | -0.16536 |
| ZNF844     | -0.16536 |
| RAB2B      | -0.16541 |
| ZNF487     | -0.16541 |
| MIR4786    | -0.16541 |
| HM13-IT1   | -0.16554 |
| ANKRD49    | -0.16564 |
| C20orf194  | -0.1657  |
| IFI6       | -0.16573 |
| ACP2       | -0.16574 |
| LRRC31     | -0.16584 |
| ME2        | -0.16589 |
| NUP50-DT   | -0.1659  |
| PRKY       | -0.16591 |
| AC007191.1 | -0.16592 |
| TBC1D19    | -0.16607 |
| LEPROTL1   | -0.16608 |
| AC087741.1 | -0.16612 |
| CNNM3-DT   | -0.1662  |
| ARL4C      | -0.16625 |
| CHI3L1     | -0.1664  |
| AC002070.1 | -0.1664  |
| AF186192.2 | -0.16642 |
| AATBC      | -0.16661 |
| HCK        | -0.16662 |
| GK         | -0.16664 |
| BCL2L14    | -0.16666 |
| SCLT1      | -0.16667 |
| EBLN3P     | -0.16677 |
| NAA16      | -0.16681 |
| DCP2       | -0.1669  |
| MXD3       | -0.16693 |
| AC010185.1 | -0.16694 |
| AL445222.1 | -0.16695 |
| SLC22A15   | -0.16695 |
| RNVU1-3    | -0.16703 |
| AP001271.1 | -0.16703 |
| APBA3      | -0.16703 |
| SCAMP1-AS1 | -0.16707 |
| CIPC       | -0.16711 |
| NSUN7      | -0.16718 |
| SARAF      | -0.16722 |
| RIPK3      | -0.16729 |
| ADAM19     | -0.16735 |
| MT-TP      | -0.16738 |
| C1S        | -0.16739 |

|            |          |
|------------|----------|
| PKD1P6     | -0.16743 |
| SLC35G1    | -0.16743 |
| ZGLP1      | -0.16743 |
| DDB2       | -0.16747 |
| C17orf97   | -0.1675  |
| AC124798.1 | -0.16758 |
| AC012313.5 | -0.1676  |
| GARS1-DT   | -0.16762 |
| CDC25B     | -0.16764 |
| RABEP2     | -0.16773 |
| NSMAF      | -0.16778 |
| TMEM9B-AS1 | -0.1678  |
| ZNF230     | -0.16789 |
| DDX5       | -0.16799 |
| TMSB4X     | -0.168   |
| SAP30      | -0.16804 |
| ZNF93      | -0.16811 |
| CASP8      | -0.16812 |
| TMSB4XP4   | -0.16817 |
| PRDM2      | -0.1682  |
| AC011472.1 | -0.16821 |
| EIF2AK3    | -0.16829 |
| GRAMD4     | -0.16851 |
| WDR54      | -0.16851 |
| ZNF30      | -0.16852 |
| KDM2B      | -0.16863 |
| GRK6       | -0.16869 |
| ZNF548     | -0.16885 |
| AP005899.1 | -0.16889 |
| PRR22      | -0.16892 |
| LACC1      | -0.16892 |
| IFIT2      | -0.16893 |
| VWF        | -0.16896 |
| OSGEP      | -0.16898 |
| SLC1A7     | -0.16902 |
| AC020558.2 | -0.16917 |
| PM20D2     | -0.16922 |
| CES4A      | -0.16925 |
| PARP9      | -0.16925 |
| PTAR1      | -0.16925 |
| AP002807.1 | -0.16926 |
| CDK20      | -0.16926 |
| NEU3       | -0.16931 |
| ZNF160     | -0.16931 |
| RASSF9     | -0.16936 |
| AL132780.4 | -0.1694  |
| EPB41L3    | -0.16945 |
| AC135050.5 | -0.16955 |
| INPP4A     | -0.16959 |

|             |          |
|-------------|----------|
| PCNX2       | -0.16967 |
| RN7SKP51    | -0.16972 |
| AC090517.2  | -0.16982 |
| GLI4        | -0.16987 |
| TRAPPC6B    | -0.16989 |
| ZNF234      | -0.16989 |
| HHEX        | -0.16991 |
| SLC34A2     | -0.16992 |
| AC124944.1  | -0.16997 |
| PI4KAP1     | -0.16997 |
| IFI16       | -0.17004 |
| NFATC3      | -0.17009 |
| TBX5        | -0.17011 |
| PHACTR2     | -0.17012 |
| MFSD4A      | -0.17014 |
| AC008608.2  | -0.17017 |
| TNK2        | -0.17021 |
| ZFP3        | -0.17024 |
| FAM214A     | -0.17026 |
| MIR3945HG   | -0.1703  |
| BX284668.3  | -0.17035 |
| SNORD116-4  | -0.17037 |
| MID1IP1-AS1 | -0.17039 |
| CASC19      | -0.17046 |
| LINC00920   | -0.17049 |
| LPL         | -0.17051 |
| NEMF        | -0.17053 |
| MT-ND1      | -0.17065 |
| SNORD99     | -0.17065 |
| ZNF550      | -0.17068 |
| TMX4        | -0.17079 |
| RPS6KL1     | -0.17098 |
| ERICH6-AS1  | -0.17113 |
| MPC1        | -0.17114 |
| ZXDA        | -0.17117 |
| SPIRE1      | -0.1712  |
| STRADA      | -0.17123 |
| ABHD17A     | -0.17126 |
| SETBP1-DT   | -0.17127 |
| CIART       | -0.17128 |
| RASL11A     | -0.17144 |
| ANOS1       | -0.17146 |
| MAGEH1      | -0.17152 |
| VIPR1       | -0.1716  |
| RPL10P9     | -0.17161 |
| ZNF706      | -0.17161 |
| PER3        | -0.17162 |
| TLR3        | -0.17166 |
| MTERF2      | -0.17167 |

|             |          |
|-------------|----------|
| LRIG2       | -0.17169 |
| IKZF4       | -0.17171 |
| AP005329.2  | -0.17171 |
| MUC20-OT1   | -0.17176 |
| AL031186.1  | -0.17177 |
| PCP2        | -0.17178 |
| AC006449.6  | -0.17192 |
| ADCY7       | -0.17196 |
| ZNF19       | -0.17197 |
| ZNF175      | -0.17203 |
| IYD         | -0.17205 |
| SLC25A42    | -0.17215 |
| POMK        | -0.17216 |
| MIR573      | -0.17222 |
| ALKAL2      | -0.17232 |
| LPAR5       | -0.17237 |
| AL022322.1  | -0.17242 |
| RBM11       | -0.17256 |
| ATG2B       | -0.17259 |
| ARHGAP5     | -0.17271 |
| CSPG4P10    | -0.17285 |
| RNU4ATAC18P | -0.17288 |
| PDE4DIPP6   | -0.17296 |
| RNF130      | -0.17296 |
| RBM14-RBM4  | -0.17297 |
| AC010504.1  | -0.17302 |
| AC008555.6  | -0.17304 |
| AC025178.1  | -0.17306 |
| DNASE2      | -0.17307 |
| ARHGEF15    | -0.1731  |
| PMS2P3      | -0.17312 |
| AC106897.1  | -0.17321 |
| ALDH3B2     | -0.17327 |
| FOXP2       | -0.17328 |
| SCAI        | -0.17329 |
| ZBTB40      | -0.17332 |
| MMP1        | -0.17334 |
| TUB         | -0.17342 |
| BEST4       | -0.1735  |
| BCAR3-AS1   | -0.17365 |
| SIRT2       | -0.17367 |
| ANGPT1      | -0.1737  |
| ZNF254      | -0.17371 |
| AC098935.1  | -0.17373 |
| ZNF724      | -0.17374 |
| RPL36AL     | -0.17375 |
| PAN3        | -0.17376 |
| AC091563.1  | -0.17377 |
| AL162377.1  | -0.17378 |

|            |          |
|------------|----------|
| NRL        | -0.1738  |
| P2RY1      | -0.17386 |
| ZNF571     | -0.17392 |
| TNFAIP2    | -0.17403 |
| AC087071.1 | -0.17406 |
| DICER1-AS1 | -0.17417 |
| RRAD       | -0.17422 |
| AC104463.2 | -0.17425 |
| ANKRD10    | -0.17432 |
| ZDHHC2     | -0.17433 |
| CENPT      | -0.17435 |
| ZNF750     | -0.17436 |
| TNFSF11    | -0.17439 |
| SFRP2      | -0.17445 |
| TUBE1      | -0.17446 |
| SELENOP    | -0.17449 |
| MIR6071    | -0.1746  |
| AC090425.3 | -0.17468 |
| AKAP9      | -0.1747  |
| AL035587.1 | -0.17478 |
| KLHDC7A    | -0.17482 |
| CELSR3     | -0.17488 |
| ATXN1-AS1  | -0.1749  |
| AC008764.2 | -0.17492 |
| HBA1       | -0.17499 |
| TRDC       | -0.17506 |
| SDCBP2-AS1 | -0.17509 |
| AC037459.2 | -0.17509 |
| LUC7L      | -0.17509 |
| AC007406.4 | -0.17512 |
| AC132812.1 | -0.17528 |
| POP4       | -0.17535 |
| EMC9       | -0.17542 |
| LIMK2      | -0.17543 |
| APOL2      | -0.17546 |
| FLVCR2     | -0.17547 |
| FLVCR1     | -0.17548 |
| AL049840.3 | -0.17559 |
| MSR1       | -0.17565 |
| ADCK1      | -0.1758  |
| ZNF25      | -0.1758  |
| SNX30      | -0.17581 |
| ZNF226     | -0.17582 |
| CD99P1     | -0.17588 |
| Z93930.2   | -0.17597 |
| ZMYND12    | -0.17597 |
| GSDMD      | -0.17602 |
| AC253576.2 | -0.17608 |
| SCUBE1     | -0.17615 |

|            |          |
|------------|----------|
| CFD        | -0.17618 |
| SRP54      | -0.17621 |
| INO80D     | -0.17624 |
| PPP2R3C    | -0.17633 |
| UHRF2      | -0.1764  |
| PLEKHG5    | -0.17647 |
| IKZF2      | -0.17652 |
| KLF9       | -0.17653 |
| CCDC157    | -0.17654 |
| CHIC1      | -0.17657 |
| ANKHD1     | -0.17663 |
| STAT5B     | -0.17666 |
| TGFB3      | -0.17679 |
| FMNL2      | -0.17696 |
| AC006077.2 | -0.17697 |
| LINC01816  | -0.17697 |
| ZNF736     | -0.17703 |
| DMAC2L     | -0.17707 |
| CHD7       | -0.17713 |
| RASSF1     | -0.17714 |
| GLCCI1     | -0.17738 |
| SNRK       | -0.1774  |
| APH1B      | -0.17741 |
| PHF21A     | -0.17751 |
| RRP7BP     | -0.17768 |
| CD24       | -0.1777  |
| BX470102.1 | -0.17775 |
| ECM1       | -0.17776 |
| SCD5       | -0.17782 |
| TUBB2A     | -0.17783 |
| AP001462.1 | -0.17783 |
| SIMC1      | -0.17785 |
| BBOX1      | -0.17787 |
| AC092171.4 | -0.17788 |
| MED14OS    | -0.17799 |
| HMCN1      | -0.17802 |
| ANXA2P1    | -0.17802 |
| CCDC14     | -0.17803 |
| AGAP6      | -0.17803 |
| NFATC4     | -0.17811 |
| DUSP28     | -0.17814 |
| MSS51      | -0.17822 |
| HACD4      | -0.17832 |
| ZFP14      | -0.17832 |
| COL16A1    | -0.17833 |
| A1BG-AS1   | -0.17835 |
| SH3BGRL    | -0.17839 |
| GIT2       | -0.17843 |
| RPS19P3    | -0.17857 |

|            |          |
|------------|----------|
| KDM8       | -0.17858 |
| PSPHP1     | -0.17861 |
| GUCY1A1    | -0.17863 |
| KCTD7      | -0.17867 |
| CEP83      | -0.17871 |
| STEAP4     | -0.17874 |
| TMSB4XP2   | -0.17876 |
| TRIM2      | -0.1788  |
| RIBC2      | -0.17887 |
| ZNF436-AS1 | -0.17896 |
| C8orf88    | -0.17897 |
| SELENOK    | -0.179   |
| AC253536.5 | -0.17901 |
| C2orf72    | -0.17904 |
| PAPSS2     | -0.17905 |
| NSMCE4A    | -0.17913 |
| MDN1       | -0.17916 |
| PLEKHA2    | -0.17916 |
| CLEC2B     | -0.17918 |
| SLC2A9     | -0.17918 |
| AC009237.3 | -0.17924 |
| TRAFD1     | -0.17934 |
| LNPEP      | -0.17935 |
| SLC6A20    | -0.17936 |
| KCNQ3      | -0.1794  |
| SP100      | -0.17947 |
| CLEC3B     | -0.17959 |
| CRYBB1     | -0.17961 |
| TOR3A      | -0.17967 |
| AC060780.1 | -0.17969 |
| STK19B     | -0.17969 |
| ATP7B      | -0.1797  |
| LINC00884  | -0.17971 |
| HLA-U      | -0.17972 |
| ACSL5      | -0.17975 |
| AC006001.3 | -0.17986 |
| ZNF594     | -0.17987 |
| RNU1-153P  | -0.17992 |
| AC002553.1 | -0.17996 |
| AC022509.2 | -0.18001 |
| SNORD124   | -0.18005 |
| HECW2      | -0.18026 |
| IDH2       | -0.18027 |
| SNORD73B   | -0.1803  |
| RPSAP70    | -0.18047 |
| SEC61A2    | -0.18048 |
| CA10       | -0.1805  |
| EMILIN2    | -0.18052 |
| USF2       | -0.18052 |



|            |          |
|------------|----------|
| SFTPA1     | -0.18055 |
| PALMD      | -0.18059 |
| ZNF107     | -0.18063 |
| KCNH2      | -0.18068 |
| TRIM60P18  | -0.18071 |
| AC016542.1 | -0.18073 |
| SEPTIN4    | -0.18078 |
| SDR39U1    | -0.18089 |
| POLI       | -0.18093 |
| RNF157-AS1 | -0.18098 |
| ZNF600     | -0.181   |
| LINC00265  | -0.18103 |
| CCT2       | -0.18118 |
| SLFN12     | -0.18129 |
| CPA3       | -0.1813  |
| RASA3      | -0.18131 |
| GUCY1A2    | -0.18135 |
| AC139768.1 | -0.18138 |
| CBX6       | -0.18141 |
| KCNMA1     | -0.18142 |
| AC069200.1 | -0.18143 |
| AC005046.1 | -0.18151 |
| MAPK8IP3   | -0.18151 |
| PIGL       | -0.18157 |
| PPM1N      | -0.1816  |
| CTC1       | -0.1816  |
| CCDC88A    | -0.18164 |
| HMGA1P2    | -0.18173 |
| LINC02315  | -0.18174 |
| SIRPB1     | -0.18177 |
| AC098934.1 | -0.18199 |
| AP003108.5 | -0.18199 |
| ARL6       | -0.18204 |
| SNHG20     | -0.18204 |
| FBF1       | -0.1822  |
| NUBPL      | -0.18221 |
| FGD5       | -0.18221 |
| IL6ST      | -0.18226 |
| AL122035.1 | -0.18238 |
| NAA30      | -0.1825  |
| PIP4P1     | -0.18254 |
| AC124045.1 | -0.18254 |
| IL15RA     | -0.18259 |
| GAL3ST4    | -0.18263 |
| SCNN1B     | -0.18265 |
| GRK5       | -0.18266 |
| FAM122C    | -0.18267 |
| RGS5       | -0.1827  |
| TMEM64     | -0.18291 |

|            |          |
|------------|----------|
| PRKX       | -0.18294 |
| LENG8-AS1  | -0.18299 |
| MTHFD2L    | -0.183   |
| FOXF1      | -0.18304 |
| MT-TC      | -0.18304 |
| GNPTAB     | -0.18308 |
| EML4       | -0.1831  |
| OCIAD1-AS1 | -0.1831  |
| ZNF611     | -0.18316 |
| ZNF846     | -0.18322 |
| LINC01094  | -0.18328 |
| CA11       | -0.18334 |
| PPIAP53    | -0.18335 |
| GLUL       | -0.18345 |
| STAMBPL1   | -0.18346 |
| MIR635     | -0.18347 |
| ZNF675     | -0.18351 |
| RWDD2A     | -0.18352 |
| GDF11      | -0.18364 |
| MIR762HG   | -0.1837  |
| VGf        | -0.18374 |
| SLC46A3    | -0.18385 |
| RDH10      | -0.18389 |
| SUSD6      | -0.184   |
| SGSM1      | -0.18409 |
| C10orf143  | -0.18416 |
| FKBP3      | -0.18429 |
| ARL15      | -0.18432 |
| MPZ        | -0.18437 |
| ERAP1      | -0.18453 |
| PLCXD3     | -0.18453 |
| TBCEL      | -0.18456 |
| AL442663.4 | -0.18456 |
| ARSA       | -0.1846  |
| LARGE1     | -0.1846  |
| USP45      | -0.18462 |
| AC110079.1 | -0.18471 |
| LYSMD2     | -0.18484 |
| ATXN7L1    | -0.18492 |
| RNA5SP82   | -0.185   |
| MCM9       | -0.18502 |
| EP400P1    | -0.18504 |
| ABHD6      | -0.18515 |
| ZNF407     | -0.18546 |
| TBX15      | -0.18553 |
| SUMO1P3    | -0.18564 |
| GGCTP1     | -0.18567 |
| MYO9B      | -0.18574 |
| HCFC2      | -0.18584 |

|             |          |
|-------------|----------|
| CUTALP      | -0.18587 |
| HIPK1       | -0.18588 |
| AC135050.6  | -0.18589 |
| RAPGEF4     | -0.18596 |
| PHLPP1      | -0.18597 |
| GSTA2       | -0.18604 |
| SPON2       | -0.18614 |
| UNC5C       | -0.18615 |
| OLFML1      | -0.18629 |
| ZBTB1       | -0.18629 |
| CRABP2      | -0.1863  |
| CACNA1C     | -0.1863  |
| PLPP1       | -0.18631 |
| HSD11B1-AS1 | -0.18637 |
| SEMA4A      | -0.1864  |
| ZNF586      | -0.1864  |
| CCDC130     | -0.18647 |
| AL162274.2  | -0.18655 |
| CDO1        | -0.18661 |
| TDRD9       | -0.18663 |
| ANXA6       | -0.18691 |
| AC008610.1  | -0.18706 |
| CCT6P1      | -0.18709 |
| RNASE4      | -0.1871  |
| SLFN5       | -0.18714 |
| VPS13A      | -0.1872  |
| AC020910.5  | -0.18722 |
| TNRC6C      | -0.18723 |
| TMEM255A    | -0.18732 |
| ATP1A1-AS1  | -0.18734 |
| ZBTB7C      | -0.18734 |
| C1R         | -0.18737 |
| RARRES2     | -0.18741 |
| MYSM1       | -0.18742 |
| TVP23C      | -0.18744 |
| MUC4        | -0.18749 |
| AC022413.1  | -0.18749 |
| PLEKHM1P1   | -0.18763 |
| AC025154.2  | -0.18766 |
| HAUS7       | -0.18769 |
| FAM167B     | -0.18776 |
| SELE        | -0.18779 |
| AOC3        | -0.18783 |
| AL031666.1  | -0.18784 |
| SLC9A5      | -0.18785 |
| RAD54B      | -0.18786 |
| FUCA1       | -0.18795 |
| BTAF1       | -0.18795 |
| AC005899.6  | -0.18808 |

|            |          |
|------------|----------|
| LINC01786  | -0.18812 |
| UBR5       | -0.18814 |
| ZNF57      | -0.18822 |
| FAT4       | -0.18822 |
| ZGRF1      | -0.18829 |
| CYYR1      | -0.18829 |
| SIGLEC17P  | -0.1883  |
| SUGP2      | -0.18833 |
| METTL3     | -0.18833 |
| NFIB       | -0.18835 |
| AF111167.2 | -0.18838 |
| MBLAC1     | -0.18839 |
| AC004148.1 | -0.18851 |
| SDR16C5    | -0.18857 |
| NHS        | -0.18858 |
| ZNF491     | -0.18863 |
| AL683813.1 | -0.18866 |
| DENND6B    | -0.18871 |
| NRCAM      | -0.18876 |
| RNF122     | -0.18879 |
| SEC14L1    | -0.18885 |
| MZF1       | -0.18934 |
| PRDX4      | -0.18936 |
| FBXO33     | -0.18938 |
| CDK11A     | -0.1895  |
| AP002954.1 | -0.18958 |
| MIR6757    | -0.18959 |
| AC104083.1 | -0.1896  |
| PRCP       | -0.18965 |
| LAMC1-AS1  | -0.18967 |
| STON2      | -0.18968 |
| AL139041.1 | -0.1898  |
| CCT6P3     | -0.18989 |
| RN7SL268P  | -0.19001 |
| SIRPA      | -0.19004 |
| TNNI2      | -0.19004 |
| AL035701.1 | -0.1901  |
| AC018628.1 | -0.19027 |
| NGF        | -0.19029 |
| CBFA2T2    | -0.19029 |
| RNU6-762P  | -0.19034 |
| DENND2D    | -0.19036 |
| RPS15AP10  | -0.19037 |
| FAM13B     | -0.19052 |
| LINC01504  | -0.1906  |
| OAS2       | -0.1906  |
| BRICD5     | -0.19061 |
| SNORD101   | -0.19062 |
| DISC1      | -0.19069 |

|            |          |
|------------|----------|
| DIPK1A     | -0.19073 |
| SESN3      | -0.19074 |
| ZNF396     | -0.19078 |
| ZBTB37     | -0.19126 |
| CERK       | -0.19147 |
| TRIM21     | -0.1915  |
| TAZ        | -0.1915  |
| ADAMTS1    | -0.19166 |
| MDM2       | -0.19174 |
| PVT1       | -0.19175 |
| AL033397.2 | -0.19192 |
| ZBTB24     | -0.19198 |
| MCOLN3     | -0.19199 |
| LRRC37A2   | -0.19228 |
| SMG1       | -0.1923  |
| EPHX2      | -0.19234 |
| KDM7A      | -0.1924  |
| NAAA       | -0.19252 |
| JMY        | -0.19293 |
| LANCL1-AS1 | -0.19294 |
| AC084824.5 | -0.19295 |
| TRIM66     | -0.19296 |
| RALGPS1    | -0.19303 |
| TMCC2      | -0.19315 |
| TUBA5P     | -0.19316 |
| AC068473.5 | -0.1932  |
| MIR4664    | -0.19323 |
| ARHGAP6    | -0.19336 |
| PECAM1     | -0.1934  |
| FAM86B3P   | -0.19341 |
| IFIH1      | -0.19344 |
| CYB5R4     | -0.19345 |
| IGLV3-22   | -0.19351 |
| DTX3       | -0.19356 |
| AC104692.1 | -0.19358 |
| TEK        | -0.19365 |
| LAMP1      | -0.1937  |
| AL035409.1 | -0.19372 |
| FAXDC2     | -0.19382 |
| CTSC       | -0.19389 |
| AL356481.1 | -0.19391 |
| CSF1       | -0.19391 |
| AC007342.7 | -0.19395 |
| AL031719.2 | -0.19437 |
| RAB33B-AS1 | -0.19451 |
| AC012313.4 | -0.19454 |
| KIAA0040   | -0.19456 |
| ASB1       | -0.19465 |
| BAALC-AS1  | -0.19488 |

|             |          |
|-------------|----------|
| EPB41       | -0.19504 |
| AL031714.1  | -0.19507 |
| DGUOK-AS1   | -0.19509 |
| SCG5        | -0.1951  |
| AP000442.1  | -0.19511 |
| WDR27       | -0.19521 |
| FAM184A     | -0.19528 |
| AC103706.1  | -0.1953  |
| VMAC        | -0.19533 |
| RGCC        | -0.19547 |
| LRR1        | -0.19556 |
| TAPBPL      | -0.19563 |
| ARHGEF2-AS1 | -0.19567 |
| AL390728.5  | -0.19568 |
| FBXO34      | -0.19573 |
| VSIG4       | -0.19576 |
| RSKR        | -0.19587 |
| TAS2R14     | -0.19603 |
| USP20       | -0.19605 |
| MDGA1       | -0.19608 |
| ACRBP       | -0.19609 |
| ZNF557      | -0.19621 |
| AC107375.1  | -0.19627 |
| SLC31A1     | -0.19646 |
| KMT2E-AS1   | -0.19651 |
| SYBU        | -0.19653 |
| SLC4A4      | -0.19656 |
| RNF138      | -0.19666 |
| AZIN2       | -0.19673 |
| ANGEL1      | -0.19685 |
| MIR331      | -0.1969  |
| F8          | -0.19713 |
| CHD6        | -0.19718 |
| PADI2       | -0.19719 |
| SIX2        | -0.1972  |
| AC011461.1  | -0.19722 |
| TMED8       | -0.19722 |
| AL590617.2  | -0.19724 |
| MT-ND5      | -0.19729 |
| E2F5        | -0.1973  |
| MIR3682     | -0.1974  |
| PRDM15      | -0.19743 |
| AL161787.1  | -0.19743 |
| COX20P1     | -0.19746 |
| TBC1D8      | -0.19751 |
| RN7SL138P   | -0.19772 |
| AC008124.1  | -0.19781 |
| AL133338.1  | -0.19786 |
| AL139260.1  | -0.19801 |

|              |          |
|--------------|----------|
| CDC26P1      | -0.19803 |
| EMBP1        | -0.19812 |
| AC007485.2   | -0.19814 |
| CRYBG3       | -0.19821 |
| ZC2HC1A      | -0.19823 |
| BLMH         | -0.1983  |
| NAGK         | -0.19845 |
| CEP120       | -0.19856 |
| TBC1D32      | -0.19866 |
| MGAT3        | -0.19887 |
| PCBP1-AS1    | -0.19893 |
| MIR4326      | -0.19898 |
| AC145207.9   | -0.19899 |
| AC005828.6   | -0.19901 |
| ACE          | -0.19904 |
| KIAA0586     | -0.19912 |
| GAS5-AS1     | -0.19914 |
| TPM3P9       | -0.19917 |
| LIN7B        | -0.19919 |
| S1PR2        | -0.1992  |
| DENND4A      | -0.19923 |
| ZNF449       | -0.19923 |
| CCDC28A      | -0.19932 |
| CD209        | -0.19946 |
| AC010618.3   | -0.19951 |
| KLRK1-AS1    | -0.19953 |
| LIME1        | -0.1996  |
| RNF180       | -0.19963 |
| WNT4         | -0.19964 |
| CTSZ         | -0.19969 |
| AC093799.1   | -0.19972 |
| TACC1        | -0.19972 |
| CERS4        | -0.19973 |
| PIKFYVE      | -0.1998  |
| SARM1        | -0.19986 |
| MIPEPP3      | -0.19987 |
| SLC12A2      | -0.19988 |
| AGMAT        | -0.19991 |
| IFNAR2       | -0.19995 |
| AC080037.1   | -0.20011 |
| LINC01124    | -0.20013 |
| ANG          | -0.20016 |
| TTC32        | -0.20018 |
| ASH1L-AS1    | -0.20021 |
| ADAMTSL4-AS2 | -0.20022 |
| ARHGAP5-AS1  | -0.20025 |
| ZNF32-AS2    | -0.20029 |
| PDCD4        | -0.20039 |
| AL353743.1   | -0.2005  |

|            |          |
|------------|----------|
| CDC37L1-DT | -0.20054 |
| BCL2L2     | -0.20074 |
| ZC3H6      | -0.20092 |
| AC100854.1 | -0.20096 |
| AC000078.1 | -0.20101 |
| AC018653.3 | -0.20102 |
| HCN3       | -0.20112 |
| AC092123.1 | -0.20121 |
| SLC7A6     | -0.20125 |
| AC093890.1 | -0.20126 |
| PIAS2      | -0.20128 |
| DDO        | -0.20129 |
| GGH        | -0.20132 |
| AC021078.1 | -0.20134 |
| TNRC6B     | -0.20136 |
| CEP97      | -0.2014  |
| ZNF337     | -0.20148 |
| SUZ12P1    | -0.20151 |
| MIR3685    | -0.20157 |
| GAS6-DT    | -0.20161 |
| CHD9       | -0.20163 |
| RASL11B    | -0.20181 |
| AC009283.1 | -0.20181 |
| ZC2HC1C    | -0.2019  |
| AC074212.1 | -0.2019  |
| AL445933.1 | -0.20197 |
| LINC01936  | -0.20203 |
| SPATA6     | -0.20221 |
| AC139887.2 | -0.20223 |
| AC090152.1 | -0.20225 |
| ZSCAN5A    | -0.20239 |
| AC006435.2 | -0.20245 |
| PHF11      | -0.20258 |
| PDE7A      | -0.20259 |
| FCGBP      | -0.20261 |
| TXNDC15    | -0.20265 |
| SNHG14     | -0.20267 |
| PITPNC1    | -0.20272 |
| AC022400.6 | -0.20272 |
| ZNF354B    | -0.20277 |
| TTYH2      | -0.20283 |
| BMS1P1     | -0.20287 |
| VDAC1P8    | -0.20289 |
| MYO5A      | -0.20291 |
| AC008972.2 | -0.20293 |
| RNA5SP203  | -0.20298 |
| JAM2       | -0.20304 |
| AC096586.2 | -0.20306 |
| ACOXL      | -0.20309 |



|            |          |
|------------|----------|
| DCLK1      | -0.20314 |
| MIR4639    | -0.20314 |
| ACTR3C     | -0.20323 |
| ZNF430     | -0.20324 |
| PSME1      | -0.20325 |
| LBHD1      | -0.20339 |
| BAZ2B      | -0.20344 |
| MIR6819    | -0.20346 |
| VASH1      | -0.20359 |
| CDC42SE2   | -0.20366 |
| FAM117A    | -0.20367 |
| CSF3       | -0.20376 |
| DHX58      | -0.20379 |
| GPATCH2L   | -0.20385 |
| DRAM1      | -0.20388 |
| ZNF805     | -0.20392 |
| AGL        | -0.20395 |
| ACBD7      | -0.20404 |
| NPIP15     | -0.20418 |
| CORO2B     | -0.20431 |
| ZSCAN30    | -0.20439 |
| TCP11L2    | -0.20446 |
| LINC00685  | -0.2045  |
| TTBK2      | -0.20451 |
| AL360219.1 | -0.2046  |
| SPPL2B     | -0.20462 |
| TMX2P1     | -0.20463 |
| AC025048.2 | -0.20468 |
| CFAP251    | -0.20483 |
| LINC-PINT  | -0.20486 |
| AC004890.2 | -0.20496 |
| DGLUCY     | -0.20497 |
| CGNL1      | -0.205   |
| PLXDC1     | -0.20504 |
| PDE5A      | -0.20506 |
| SPA17      | -0.20517 |
| ST8SIA6    | -0.20521 |
| FAM126B    | -0.2053  |
| DNAJC10    | -0.20533 |
| ZNF77      | -0.20536 |
| GLRX5P2    | -0.20544 |
| GSDMB      | -0.20549 |
| FOXN2      | -0.2055  |
| AC027644.1 | -0.20551 |
| GGA2       | -0.20563 |
| ERFL       | -0.20568 |
| N4BP2L2    | -0.20574 |
| PYGO1      | -0.20585 |
| AC025171.4 | -0.20587 |

|             |          |
|-------------|----------|
| AC002563.1  | -0.20596 |
| AC073073.1  | -0.20605 |
| ZNF350      | -0.20611 |
| LIG4        | -0.20612 |
| MLKL        | -0.20612 |
| KANSL1L     | -0.20614 |
| GALNT13     | -0.20646 |
| RNU6-850P   | -0.20649 |
| AL353807.4  | -0.2066  |
| AC009237.15 | -0.20673 |
| AC129510.1  | -0.20674 |
| USP51       | -0.20674 |
| RNU6-312P   | -0.20676 |
| AMZ2P1      | -0.20681 |
| ZNF614      | -0.20687 |
| DDX47       | -0.20695 |
| WNK2        | -0.20696 |
| SPATA7      | -0.20703 |
| BHLHE41     | -0.20723 |
| DNHD1       | -0.20723 |
| BBS5        | -0.20728 |
| AC073195.1  | -0.20734 |
| SFTPA2      | -0.20739 |
| ACCS        | -0.20741 |
| AC012354.2  | -0.20748 |
| SLC25A25    | -0.20752 |
| GIPC2       | -0.20754 |
| ZNF24       | -0.20765 |
| AL022328.1  | -0.2077  |
| SERPINB9    | -0.20772 |
| ZNF506      | -0.20781 |
| DOCK4       | -0.20781 |
| KIAA2026    | -0.20789 |
| RUFY3       | -0.20791 |
| SOD2        | -0.20794 |
| RNU6-343P   | -0.20798 |
| NR0B2       | -0.20802 |
| ZNF737      | -0.20804 |
| AC009090.3  | -0.20808 |
| GMDS-DT     | -0.20826 |
| AC138028.4  | -0.20828 |
| FBXO41      | -0.2083  |
| CHRD        | -0.20832 |
| RN7SL296P   | -0.20836 |
| SYT2        | -0.20839 |
| ZNF429      | -0.20846 |
| PIK3C3      | -0.20858 |
| AC011374.2  | -0.2086  |
| AC127502.2  | -0.20871 |

|             |          |
|-------------|----------|
| DLL4        | -0.20874 |
| HERC2P2     | -0.20878 |
| CYTH1       | -0.20881 |
| GNAZ        | -0.20883 |
| CC2D2A      | -0.20887 |
| HDAC9       | -0.20895 |
| AC012676.5  | -0.20897 |
| ARIH2OS     | -0.20902 |
| CCDC183-AS1 | -0.20907 |
| FBXO48      | -0.20908 |
| ADNP-AS1    | -0.20918 |
| AL133410.1  | -0.2092  |
| GATM        | -0.20927 |
| AC010245.2  | -0.20927 |
| ARHGEF1     | -0.20933 |
| RGN         | -0.20936 |
| Z68871.1    | -0.20939 |
| ZNF791      | -0.20952 |
| PABPC1P4    | -0.20957 |
| AC055855.1  | -0.20964 |
| MIEN1       | -0.20969 |
| MT-TS2      | -0.20971 |
| PRKACB      | -0.20981 |
| L3MBTL4     | -0.20983 |
| TMEM140     | -0.20992 |
| SNORD19C    | -0.20998 |
| REPIN1-AS1  | -0.20998 |
| RNU6-531P   | -0.21001 |
| AC139795.2  | -0.21005 |
| SH2B3       | -0.21012 |
| C11orf71    | -0.21026 |
| AC005911.1  | -0.21038 |
| AC005104.1  | -0.21041 |
| FLVCR1-DT   | -0.21046 |
| UBBP4       | -0.21053 |
| NAPB        | -0.21059 |
| PRPS1P2     | -0.21061 |
| ZNF267      | -0.21062 |
| DMXL1       | -0.21065 |
| MGAT2       | -0.21068 |
| AC040169.1  | -0.21069 |
| ZNF273      | -0.21071 |
| TMEM268     | -0.21078 |
| BET1-AS1    | -0.21085 |
| AC132872.1  | -0.21085 |
| AC025165.4  | -0.21092 |
| AC141002.1  | -0.21103 |
| FHL5        | -0.21109 |
| KL          | -0.21119 |

|              |          |
|--------------|----------|
| AL604028.2   | -0.21121 |
| HAGLR        | -0.21123 |
| AL359183.1   | -0.21126 |
| TBX2-AS1     | -0.21143 |
| SYNGAP1      | -0.21152 |
| HERC6        | -0.21156 |
| ZNF431       | -0.21171 |
| RTTN         | -0.21172 |
| BIRC7        | -0.21175 |
| CCN4         | -0.21175 |
| ZNF253       | -0.21178 |
| ZNF44        | -0.21188 |
| AP001628.1   | -0.21193 |
| SLC25A25-AS1 | -0.21203 |
| PHC3         | -0.21215 |
| ARRB2        | -0.21216 |
| RNU6-282P    | -0.21224 |
| ABCA1        | -0.2123  |
| CHROMR       | -0.2123  |
| TATDN2P2     | -0.21241 |
| AC020917.4   | -0.21247 |
| IFIT1        | -0.21248 |
| AC019131.2   | -0.21253 |
| EPB41L2      | -0.21254 |
| GNAL         | -0.21254 |
| AC015912.3   | -0.21259 |
| ADCY10P1     | -0.21264 |
| ZNF333       | -0.21265 |
| TTC28        | -0.21269 |
| AC124944.2   | -0.21275 |
| AC133963.1   | -0.21281 |
| TCF4         | -0.21282 |
| AC234775.2   | -0.21287 |
| EFR3B        | -0.21287 |
| KLHDC9       | -0.21298 |
| ZNF563       | -0.213   |
| GPHN         | -0.21304 |
| LRRC6        | -0.21321 |
| LINC00909    | -0.21324 |
| SERGEF       | -0.21334 |
| AL391244.1   | -0.21343 |
| ZFP36L2      | -0.21357 |
| AC060780.2   | -0.21358 |
| RCAN2        | -0.21359 |
| RNF213       | -0.21361 |
| CEP19        | -0.21374 |
| LINC01740    | -0.21375 |
| AC073575.2   | -0.21378 |
| ARHGAP33     | -0.2138  |

|            |          |
|------------|----------|
| RPL32P3    | -0.21382 |
| AL596325.2 | -0.21393 |
| CCDC159    | -0.21396 |
| AL121832.2 | -0.21396 |
| AC133552.2 | -0.21398 |
| AL139011.1 | -0.21402 |
| SAT1       | -0.2142  |
| AC021851.1 | -0.21444 |
| MIR4668    | -0.21446 |
| C17orf67   | -0.21461 |
| DNAJC3-DT  | -0.2147  |
| AF274858.1 | -0.21488 |
| LINC02100  | -0.2149  |
| KCNJ11     | -0.2151  |
| SPTB       | -0.21515 |
| POMC       | -0.21518 |
| AC060766.6 | -0.21521 |
| FGF14-AS2  | -0.21527 |
| TPTEP2     | -0.21536 |
| LDB2       | -0.21547 |
| NPHP3      | -0.21549 |
| SLC37A2    | -0.21561 |
| CENPC      | -0.21564 |
| RND1       | -0.21567 |
| ZNF224     | -0.21568 |
| AP003392.1 | -0.21572 |
| OXNAD1     | -0.21572 |
| AP000346.2 | -0.21574 |
| ARRDC2     | -0.21576 |
| TIGD3      | -0.21587 |
| DFFB       | -0.2159  |
| SERPINF2   | -0.21592 |
| LINC01315  | -0.21593 |
| AC006942.1 | -0.21593 |
| AC007541.1 | -0.21601 |
| PHBP9      | -0.2162  |
| C2         | -0.21623 |
| CRACR2A    | -0.21635 |
| MACROD2    | -0.21641 |
| BACH2      | -0.21648 |
| ZNF169     | -0.21653 |
| APLP1      | -0.2166  |
| DZANK1     | -0.21664 |
| DDX43      | -0.2167  |
| KIFC2      | -0.21671 |
| RPL5P30    | -0.21676 |
| SNORD1B    | -0.21678 |
| GPD1       | -0.21681 |
| AC096992.2 | -0.21702 |

|                    |          |
|--------------------|----------|
| SPAG1              | -0.21703 |
| KBTBD12            | -0.21704 |
| ARG2               | -0.21713 |
| TAP2               | -0.21722 |
| AL138831.3         | -0.21726 |
| RAP2A              | -0.21733 |
| FAM221A            | -0.21735 |
| MTRNR2L1           | -0.21738 |
| PARP10             | -0.2174  |
| AL031709.1         | -0.21758 |
| PIP4K2A            | -0.21773 |
| AL357079.1         | -0.21774 |
| LINC00894          | -0.21775 |
| DNAJB9             | -0.21776 |
| POU6F1             | -0.21777 |
| CLN8               | -0.21786 |
| GINS2              | -0.21788 |
| AC010761.1         | -0.21789 |
| FMNL1              | -0.21792 |
| ZFAND4             | -0.21796 |
| AP4S1              | -0.21803 |
| GCNT4              | -0.21815 |
| TXLNGY             | -0.2182  |
| LCA5               | -0.21823 |
| BAIAP2L2           | -0.21832 |
| KLHL3              | -0.21833 |
| POLE2              | -0.21833 |
| SAP30-DT           | -0.21836 |
| DENND1C            | -0.21846 |
| ARHGAP27P1-BPTFP1- | -0.21855 |
| KPNA2P3            | -0.21855 |
| IQCD               | -0.21856 |
| RPL23AP18          | -0.21857 |
| ZNF763             | -0.2186  |
| AL442125.2         | -0.21864 |
| CH17-340M24.3      | -0.21879 |
| UTRN               | -0.21886 |
| AC090589.3         | -0.21886 |
| TRIM68             | -0.21891 |
| ZNF275             | -0.21896 |
| JAM3               | -0.219   |
| FZD3               | -0.21911 |
| IRAK4              | -0.21914 |
| RNU6-431P          | -0.2192  |
| PCF11              | -0.2192  |
| ABCA3              | -0.2192  |
| AC010186.2         | -0.21924 |
| ALOX5              | -0.2193  |
| DPYD               | -0.21937 |

|             |          |
|-------------|----------|
| STIM1-AS1   | -0.21959 |
| CARF        | -0.2196  |
| AL513534.1  | -0.2197  |
| PTAFR       | -0.21973 |
| GOLGA2P5    | -0.21992 |
| PSMB8       | -0.22    |
| RIC1        | -0.22001 |
| LRRC37B     | -0.22012 |
| AL132800.1  | -0.22022 |
| SEPTIN7P14  | -0.22029 |
| LIFR        | -0.22051 |
| MAST3       | -0.22059 |
| PPM1L       | -0.2207  |
| PXK         | -0.22086 |
| LIPE        | -0.22094 |
| MIR616      | -0.22097 |
| FAM20A      | -0.22108 |
| NBPF12      | -0.22114 |
| SETX        | -0.22121 |
| ZNF529      | -0.22126 |
| BAZ1A       | -0.22135 |
| DMTF1       | -0.22143 |
| AQP7        | -0.22145 |
| PLCH2       | -0.22152 |
| LINC01176   | -0.22168 |
| RN7SL809P   | -0.22194 |
| AC124319.1  | -0.22198 |
| RAPGEF1     | -0.22201 |
| RASA2       | -0.22206 |
| MBIP        | -0.22218 |
| AC116407.1  | -0.22219 |
| SLFN13      | -0.22222 |
| C19orf12    | -0.22226 |
| TMEM147-AS1 | -0.22227 |
| AC108860.2  | -0.22228 |
| FUOM        | -0.22232 |
| MRC1        | -0.22233 |
| AC026471.4  | -0.22234 |
| CYRIA       | -0.22244 |
| TUBGCP6     | -0.22245 |
| ARGLU1      | -0.2226  |
| EIF4E3      | -0.2226  |
| AC000123.3  | -0.2227  |
| AC013403.2  | -0.22275 |
| AC010197.1  | -0.22278 |
| AC026369.3  | -0.2228  |
| ZNF681      | -0.22293 |
| SLC6A12     | -0.22297 |
| RPL10P13    | -0.22306 |

|            |          |
|------------|----------|
| AC073107.2 | -0.22306 |
| CAPN10-DT  | -0.22324 |
| ZNF432     | -0.22346 |
| HLA-DRB9   | -0.22351 |
| LTB4R      | -0.22353 |
| CLUHP3     | -0.22355 |
| ZNF841     | -0.22361 |
| SLC5A9     | -0.22369 |
| ZRSR2      | -0.2237  |
| FGFBP3     | -0.22374 |
| SYNE4      | -0.22379 |
| ANKMY1     | -0.22387 |
| KIF24      | -0.22391 |
| TPK1       | -0.22394 |
| ZNF56      | -0.22397 |
| EPM2A      | -0.22401 |
| AC008496.2 | -0.22401 |
| SOX21      | -0.22403 |
| SGK1       | -0.22405 |
| IL11RA     | -0.22414 |
| CCRL2      | -0.22416 |
| ZNF136     | -0.22417 |
| XCL1       | -0.2242  |
| HS3ST1     | -0.22435 |
| DOK5       | -0.22436 |
| ACYP1      | -0.22464 |
| TIAF1      | -0.22467 |
| MAGI2-AS3  | -0.2247  |
| PDZRN3     | -0.2248  |
| AC011481.1 | -0.22482 |
| ASPHD2     | -0.22485 |
| ABCC6P2    | -0.22487 |
| EME2       | -0.22492 |
| SLC25A35   | -0.22496 |
| FCRLB      | -0.22504 |
| COCH       | -0.22517 |
| SCN4B      | -0.22518 |
| C20orf96   | -0.22521 |
| ZNF767P    | -0.22521 |
| ACTA2-AS1  | -0.22525 |
| AP001033.2 | -0.22537 |
| AC105118.1 | -0.22539 |
| AC015849.3 | -0.22545 |
| SORL1      | -0.22557 |
| QRSL1      | -0.22558 |
| SMPDL3A    | -0.22564 |
| AC008972.1 | -0.22569 |
| GPR84      | -0.22572 |
| AL138921.2 | -0.22575 |



|            |          |
|------------|----------|
| CEP162     | -0.22583 |
| GLIPR1     | -0.22588 |
| HNRNPCP1   | -0.22588 |
| SH3BP1     | -0.22605 |
| AC079684.1 | -0.22607 |
| GAB2       | -0.22614 |
| SCIN       | -0.22619 |
| AC242426.2 | -0.22621 |
| AP001160.1 | -0.22633 |
| GSAP       | -0.22634 |
| SLFN11     | -0.22635 |
| CNKSR3     | -0.22638 |
| UBE2Q2P2   | -0.22641 |
| ATP6V1B2   | -0.22674 |
| ZNF296     | -0.22675 |
| RNF207     | -0.2268  |
| ADAP2      | -0.22682 |
| AKT3       | -0.22688 |
| ZNF236     | -0.22691 |
| FUT8       | -0.22699 |
| AC022098.1 | -0.22704 |
| MAF        | -0.22717 |
| AC135050.3 | -0.22718 |
| CRISPLD2   | -0.22718 |
| LMO2       | -0.22726 |
| AC022400.4 | -0.2273  |
| PTGIR      | -0.22734 |
| ZDHHHC14   | -0.22734 |
| SGTB       | -0.22736 |
| ARHGAP26   | -0.22758 |
| VIM-AS1    | -0.2276  |
| GZMM       | -0.22769 |
| RPL10P19   | -0.22781 |
| DDX17      | -0.22782 |
| ZNF782     | -0.22803 |
| RBM38      | -0.22818 |
| HLA-J      | -0.22827 |
| TMEM154    | -0.22839 |
| APOBR      | -0.22843 |
| AC079907.1 | -0.22853 |
| NUP210     | -0.22861 |
| TSPYL2     | -0.22869 |
| SRSF5      | -0.22874 |
| SNORA59A   | -0.22874 |
| AC003102.1 | -0.22892 |
| PARP8      | -0.229   |
| MIR27A     | -0.22904 |
| CACHD1     | -0.22909 |
| LINC01534  | -0.2291  |

|             |          |
|-------------|----------|
| AL162413.1  | -0.22915 |
| KLHL11      | -0.22932 |
| NFAT5       | -0.22946 |
| ZBTB18      | -0.22954 |
| RELCH       | -0.22961 |
| KRT23       | -0.22964 |
| ZNF83       | -0.22968 |
| NBPF8       | -0.2299  |
| RAB29       | -0.22995 |
| WASIR2      | -0.23003 |
| BATF        | -0.23008 |
| ZNF662      | -0.23017 |
| AC022497.1  | -0.23025 |
| STARD8      | -0.23033 |
| HOOK3       | -0.23042 |
| AC006017.1  | -0.23057 |
| CIBAR1      | -0.23068 |
| IRF5        | -0.23069 |
| AL442224.1  | -0.23072 |
| TEP1        | -0.23073 |
| FAM118A     | -0.23092 |
| KLHL28      | -0.23097 |
| RHEBL1      | -0.23102 |
| SNORA11F    | -0.23119 |
| CCL8        | -0.2312  |
| ZNF397      | -0.23127 |
| TNIP3       | -0.2315  |
| SYNE2       | -0.23164 |
| NDUFV2-AS1  | -0.23169 |
| AC011503.2  | -0.23175 |
| RPS6KA2-IT1 | -0.23178 |
| GPR68       | -0.23185 |
| RNU6-1095P  | -0.23198 |
| AC139769.3  | -0.23205 |
| KANTR       | -0.23207 |
| RALGDS      | -0.23207 |
| PSIP1       | -0.23207 |
| CYP4V2      | -0.2321  |
| DNM3OS      | -0.23221 |
| AL928654.2  | -0.23222 |
| GOLGA8B     | -0.23225 |
| ACAA2       | -0.23226 |
| AL645929.1  | -0.23227 |
| NPIPP1      | -0.23229 |
| RGS17       | -0.23233 |
| FAM53B      | -0.23239 |
| GPS2        | -0.23243 |
| CROCC       | -0.2325  |
| CHMP4A      | -0.23254 |

|            |          |
|------------|----------|
| AC092803.1 | -0.23281 |
| SNORD14A   | -0.2329  |
| AL358472.2 | -0.23307 |
| AL132780.1 | -0.23317 |
| TAL1       | -0.23318 |
| ZNF292     | -0.23337 |
| FCHSD1     | -0.23362 |
| HIVEP3     | -0.23366 |
| WASH7P     | -0.23368 |
| AP000766.1 | -0.23373 |
| AC108010.1 | -0.23376 |
| TMC5       | -0.23382 |
| PHF8       | -0.23387 |
| ASLP1      | -0.2339  |
| RABGAP1L   | -0.23398 |
| NLRC4      | -0.23409 |
| CCL24      | -0.23411 |
| SPAG4      | -0.23412 |
| AC018752.1 | -0.23423 |
| USP27X     | -0.23432 |
| NIM1K      | -0.23434 |
| AP000553.2 | -0.23445 |
| AL049838.1 | -0.2345  |
| XKRX       | -0.23452 |
| AC024075.1 | -0.23469 |
| CYP27B1    | -0.2347  |
| DUSP1      | -0.23475 |
| AC079414.3 | -0.23487 |
| FRG1HP     | -0.23502 |
| AC024558.1 | -0.23503 |
| HERC2P7    | -0.23506 |
| GASK1A     | -0.23512 |
| TNFAIP8L1  | -0.23514 |
| AC024075.3 | -0.23515 |
| TXNDC11    | -0.23515 |
| HEATR5A    | -0.23519 |
| BRD9P2     | -0.23521 |
| AC005837.3 | -0.23542 |
| AC022211.1 | -0.2355  |
| AL022328.2 | -0.23557 |
| AC120114.3 | -0.23566 |
| CST2       | -0.23572 |
| ADGRE1     | -0.23602 |
| PRORS1P    | -0.23603 |
| SLC46A2    | -0.23607 |
| ALKBH6     | -0.23608 |
| HMGA1P4    | -0.23612 |
| LRIG1      | -0.23612 |
| IFIT3      | -0.23613 |

|            |          |
|------------|----------|
| CDKN2C     | -0.23629 |
| AC022916.1 | -0.2363  |
| EXOG       | -0.23633 |
| ATF7-NPFF  | -0.23636 |
| RSAD2      | -0.23639 |
| KLHDC4     | -0.23639 |
| AL138976.2 | -0.2364  |
| CAVIN2     | -0.23651 |
| TBXAS1     | -0.23652 |
| AC015961.2 | -0.23654 |
| GDAP1      | -0.23665 |
| ADGRE3     | -0.23671 |
| CLIP3      | -0.23676 |
| NPM1P26    | -0.23683 |
| DYRK4      | -0.23684 |
| AC011498.6 | -0.23687 |
| LINC01348  | -0.23689 |
| PPM1M      | -0.23712 |
| ZNF385A    | -0.23735 |
| TTC14      | -0.23765 |
| ZNF731P    | -0.23789 |
| AC010273.3 | -0.23808 |
| BTG1       | -0.23823 |
| ZFYVE28    | -0.23823 |
| RNU6-930P  | -0.23825 |
| ZNF276     | -0.23827 |
| FOLR3      | -0.23831 |
| LRCH2      | -0.23831 |
| RAMP1      | -0.23853 |
| AC090772.4 | -0.23858 |
| DDX60      | -0.23872 |
| FAM177A1   | -0.23876 |
| CCNL1      | -0.23888 |
| SMCHD1     | -0.23892 |
| AC004816.1 | -0.23894 |
| NAALADL1   | -0.23904 |
| TAF4B      | -0.23906 |
| AC012065.2 | -0.23911 |
| FNBP4      | -0.23912 |
| RPL37P12   | -0.23914 |
| ATF3       | -0.23915 |
| AC007066.2 | -0.23922 |
| PIP5K1B    | -0.23932 |
| AC010168.2 | -0.23932 |
| AC011290.2 | -0.23936 |
| SCAT2      | -0.23941 |
| FBXO10     | -0.2395  |
| RAB30-DT   | -0.23954 |
| ARHGAP18   | -0.23963 |

|             |          |
|-------------|----------|
| HGF         | -0.23973 |
| AC078846.1  | -0.23976 |
| DUX4L50     | -0.24017 |
| AC027796.2  | -0.24022 |
| MIR554      | -0.24028 |
| LENG8       | -0.24034 |
| SNRPGP15    | -0.24036 |
| TMEM198     | -0.24038 |
| HSPBAP1     | -0.24038 |
| MMP25-AS1   | -0.24051 |
| SNORD83A    | -0.24053 |
| ANKRD10-IT1 | -0.24064 |
| AL121949.2  | -0.2408  |
| DGKH        | -0.24085 |
| PADI1       | -0.24086 |
| PLN         | -0.24092 |
| LRRC23      | -0.24106 |
| ZNF613      | -0.24117 |
| MT-TY       | -0.2412  |
| RAB8B       | -0.24124 |
| SOCS4       | -0.24148 |
| DCK         | -0.24175 |
| SUCNR1      | -0.24189 |
| VPS13B      | -0.24191 |
| SNHG10      | -0.24207 |
| AC008267.2  | -0.24229 |
| UBE3D       | -0.24236 |
| STK17B      | -0.24244 |
| MED8-AS1    | -0.24245 |
| AC004982.1  | -0.24248 |
| ZNF426-DT   | -0.24248 |
| C4orf19     | -0.24248 |
| AC011815.3  | -0.24271 |
| AP001107.9  | -0.24272 |
| TCEANC      | -0.24283 |
| AC008555.4  | -0.24284 |
| TMCO3       | -0.24288 |
| MCUB        | -0.24292 |
| HNF4G       | -0.24295 |
| SRD5A3-AS1  | -0.24296 |
| MARK1       | -0.24297 |
| SHISA2      | -0.24305 |
| MOXD1       | -0.24307 |
| LINC00641   | -0.24309 |
| CTBP1-AS    | -0.24331 |
| AL133243.2  | -0.24332 |
| SHFL        | -0.24338 |
| RN7SL181P   | -0.24352 |
| LINC00106   | -0.24368 |

|            |          |
|------------|----------|
| LINC02062  | -0.24387 |
| RPL28P2    | -0.24392 |
| CCDC102B   | -0.24405 |
| SCTR-AS1   | -0.2441  |
| TMOD2      | -0.24414 |
| CCL20      | -0.24419 |
| AC017104.1 | -0.2442  |
| RNU6-1099P | -0.24421 |
| MDM4       | -0.24421 |
| FAM149A    | -0.24424 |
| PCP4L1     | -0.24432 |
| AC027277.2 | -0.24441 |
| MIR378G    | -0.24467 |
| CREBRF     | -0.2447  |
| FAM193B    | -0.24472 |
| LINC00921  | -0.24479 |
| KANK3      | -0.24485 |
| GSTM2      | -0.24487 |
| IL10RB-DT  | -0.24494 |
| CD300LB    | -0.24496 |
| ADAT2      | -0.24499 |
| AC009120.1 | -0.24501 |
| PSME2P2    | -0.24505 |
| AC074032.1 | -0.24508 |
| NRIP2      | -0.24517 |
| WDR88      | -0.24535 |
| AC009237.8 | -0.24537 |
| NEK11      | -0.24537 |
| ROBO1      | -0.2454  |
| PTPRB      | -0.24545 |
| SSH2       | -0.24558 |
| MAMDC2     | -0.24569 |
| TMEM131L   | -0.24572 |
| ALPK1      | -0.24573 |
| AC127024.5 | -0.24581 |
| CROCCP2    | -0.24594 |
| AL122035.2 | -0.24606 |
| CPT1B      | -0.24612 |
| AC133134.1 | -0.24624 |
| FOLR2      | -0.24632 |
| AC015726.1 | -0.24664 |
| GCA        | -0.24678 |
| MERTK      | -0.24682 |
| PIF1       | -0.24687 |
| PAXBP1-AS1 | -0.24689 |
| CMPK2      | -0.24691 |
| MIR5587    | -0.24699 |
| PARP11     | -0.24714 |
| HS3ST5     | -0.24714 |

|            |          |
|------------|----------|
| LINC00649  | -0.24727 |
| ZCCHC2     | -0.2473  |
| UTP20      | -0.2475  |
| ACSS2      | -0.24753 |
| ANKRD61    | -0.24755 |
| PCID2      | -0.24779 |
| LINC01355  | -0.24787 |
| SNORD12B   | -0.24792 |
| AL671277.1 | -0.24803 |
| MIR378J    | -0.24804 |
| WDR7       | -0.24813 |
| ID2        | -0.24819 |
| AC103702.2 | -0.24833 |
| MAN2B1     | -0.24843 |
| SP4        | -0.24847 |
| MICU3      | -0.24848 |
| HECW2-AS1  | -0.24856 |
| AL162724.2 | -0.24857 |
| AC008735.4 | -0.24865 |
| JAZF1      | -0.24868 |
| SHLD1      | -0.24875 |
| HOXB4      | -0.24877 |
| SPACA9     | -0.24887 |
| ADRA2A     | -0.24899 |
| SMIM15P2   | -0.24901 |
| AC018665.1 | -0.24911 |
| AC138956.2 | -0.24913 |
| PASK       | -0.24942 |
| ULK4       | -0.24942 |
| AC087222.1 | -0.2496  |
| SLIT2      | -0.24986 |
| CETP       | -0.25    |
| AL354733.3 | -0.25005 |
| AC117503.2 | -0.25015 |
| AL513550.1 | -0.25042 |
| UTY        | -0.25062 |
| SRCIN1     | -0.25067 |
| SPESP1     | -0.25071 |
| RNU6-1223P | -0.25072 |
| ZNF182     | -0.25074 |
| SERPING1   | -0.25096 |
| LINC00115  | -0.25103 |
| PTGER2     | -0.25107 |
| AC004540.2 | -0.25124 |
| AC012186.2 | -0.25129 |
| AC073548.1 | -0.25131 |
| EPHA3      | -0.25141 |
| PAEP       | -0.25142 |
| CDH17      | -0.25148 |

|            |          |
|------------|----------|
| ATP1B2     | -0.25158 |
| CCDC74A    | -0.25181 |
| YEATS4     | -0.25194 |
| AC104564.3 | -0.25225 |
| AC025171.2 | -0.25231 |
| PLEKHF1    | -0.25266 |
| UBR5-AS1   | -0.25269 |
| PLCB1      | -0.25274 |
| ISG20      | -0.25276 |
| ST3GAL6    | -0.25277 |
| TRIM52     | -0.25285 |
| PRPF39     | -0.25286 |
| ARHGEF38   | -0.25291 |
| AC026124.2 | -0.25292 |
| MILR1      | -0.25308 |
| CFAP221    | -0.25315 |
| ABCA8      | -0.25336 |
| RNF126P1   | -0.2534  |
| RABL2A     | -0.25341 |
| GOLGA6L9   | -0.25342 |
| NFATC1     | -0.25371 |
| SENP7      | -0.25377 |
| SLC4A11    | -0.2539  |
| KLHDC1     | -0.25393 |
| CRLF3      | -0.25394 |
| AC002553.2 | -0.254   |
| LIX1L      | -0.25414 |
| SPARCL1    | -0.25437 |
| AC005077.4 | -0.25441 |
| RBM6       | -0.25459 |
| AC139887.4 | -0.25469 |
| MAP3K1     | -0.25476 |
| PSME2P1    | -0.25478 |
| S100A5     | -0.25487 |
| ADPRH      | -0.25491 |
| NFYC-AS1   | -0.25498 |
| DNAL1      | -0.255   |
| PPP1R14D   | -0.25506 |
| AC018521.6 | -0.25533 |
| AC004801.2 | -0.25536 |
| NOD2       | -0.2554  |
| AP1G2      | -0.25548 |
| LINC01063  | -0.25553 |
| AC005831.1 | -0.25556 |
| CFL1P5     | -0.25558 |
| ATP8B2     | -0.25563 |
| PCNX1      | -0.25569 |
| TMEM86A    | -0.25571 |
| NXF3       | -0.25577 |



|            |          |
|------------|----------|
| AL024508.1 | -0.25585 |
| CA5B       | -0.2559  |
| SYTL3      | -0.25592 |
| PRSS12     | -0.25606 |
| H1-10-AS1  | -0.25618 |
| ARID4A     | -0.25629 |
| LINC01876  | -0.25631 |
| SH2D2A     | -0.25632 |
| MSL3       | -0.25633 |
| APOBEC3C   | -0.25649 |
| SNORD6     | -0.25667 |
| CFLAR      | -0.25687 |
| ZNF582-AS1 | -0.25698 |
| FCHSD2     | -0.2571  |
| PAIP2B     | -0.25711 |
| NIBAN1     | -0.25717 |
| SNORD69    | -0.25723 |
| AC135983.2 | -0.25729 |
| HCAR3      | -0.25736 |
| AQP4       | -0.2574  |
| ARMH4      | -0.25741 |
| AC090579.1 | -0.25751 |
| SLC26A2    | -0.25752 |
| RFX5       | -0.25765 |
| STK32A-AS1 | -0.2578  |
| AFG3L1P    | -0.25786 |
| SLC16A10   | -0.25796 |
| FHL1       | -0.25801 |
| EFCC1      | -0.25803 |
| CASP10     | -0.25813 |
| TLE4       | -0.25822 |
| AL137779.2 | -0.25832 |
| SNORD72    | -0.25837 |
| C21orf58   | -0.2584  |
| ZNF441     | -0.25848 |
| AC022150.4 | -0.25853 |
| SERPINF1   | -0.25869 |
| AC008735.2 | -0.25881 |
| CHN2       | -0.259   |
| MST1L      | -0.25912 |
| BCL11A     | -0.25917 |
| PCM1       | -0.25923 |
| LINC02185  | -0.25928 |
| DNAAF4     | -0.25935 |
| PALD1      | -0.25946 |
| ACY3       | -0.25949 |
| CA4        | -0.25949 |
| AC114495.2 | -0.25958 |
| RNA5SP311  | -0.25986 |

|            |          |
|------------|----------|
| AL137003.1 | -0.25995 |
| CD14       | -0.25996 |
| ZNF738     | -0.25998 |
| AC024060.2 | -0.26034 |
| AL157392.3 | -0.26039 |
| ZNF460-AS1 | -0.26069 |
| RGS11      | -0.26092 |
| AC010615.1 | -0.261   |
| AL354766.2 | -0.26113 |
| LINC00324  | -0.26115 |
| AC009053.1 | -0.26125 |
| RNU5B-2P   | -0.26157 |
| PLEKHF2    | -0.26161 |
| CYP2U1     | -0.26166 |
| EMB        | -0.26172 |
| SOX21-AS1  | -0.26175 |
| RNF19A     | -0.262   |
| AC087752.4 | -0.262   |
| MEIS1      | -0.26203 |
| PGAP1      | -0.26208 |
| FAM13C     | -0.26229 |
| ABCC6P1    | -0.26243 |
| PTP4A3     | -0.26247 |
| MGP        | -0.26252 |
| CHKB       | -0.26252 |
| CHP1P2     | -0.26263 |
| RAD51-AS1  | -0.26267 |
| RPS12P3    | -0.26283 |
| AL391988.1 | -0.26294 |
| MIR27B     | -0.26294 |
| AC003070.1 | -0.26301 |
| AP001528.2 | -0.2631  |
| WWOX       | -0.26329 |
| MIR4520-1  | -0.26349 |
| APOL4      | -0.26357 |
| AC090607.2 | -0.26363 |
| ERN1       | -0.26369 |
| PRR5L      | -0.26376 |
| DUOX1      | -0.26422 |
| IRF2-DT    | -0.26434 |
| SPRR2F     | -0.2644  |
| EXPH5      | -0.26445 |
| IRAK1BP1   | -0.26475 |
| FAM111A    | -0.26491 |
| PINLYP     | -0.26498 |
| AL117336.1 | -0.26503 |
| H2AC9P     | -0.26513 |
| IFITM1     | -0.26522 |
| ANKRD29    | -0.26525 |

|             |          |
|-------------|----------|
| ZNF671      | -0.26526 |
| SPNS3       | -0.26555 |
| AC005021.1  | -0.2657  |
| COA6-AS1    | -0.26573 |
| AC067852.3  | -0.2658  |
| ZFAT        | -0.26601 |
| TRMT10B     | -0.26626 |
| SOS1-IT1    | -0.26636 |
| IFI27       | -0.26654 |
| CCR1        | -0.26657 |
| ZNF852      | -0.26678 |
| KIAA1328    | -0.26679 |
| TLR2        | -0.26692 |
| EP300-AS1   | -0.26695 |
| RTCA-AS1    | -0.26729 |
| ODC1-DT     | -0.26732 |
| AC060766.3  | -0.26742 |
| DLL1        | -0.26744 |
| MAPRE2      | -0.26751 |
| BATF2       | -0.26752 |
| TCN2        | -0.26753 |
| AL365436.3  | -0.26765 |
| TEX9        | -0.2677  |
| NR5A2       | -0.26794 |
| AC055720.2  | -0.26806 |
| SDK1        | -0.2681  |
| AP000866.5  | -0.26811 |
| NMNAT2      | -0.26818 |
| FAM185BP    | -0.26824 |
| CD164L2     | -0.26831 |
| AC006128.1  | -0.26834 |
| GK-AS1      | -0.26835 |
| TMED6       | -0.26837 |
| OSCP1       | -0.26852 |
| AC008982.2  | -0.26863 |
| SEMA3F-AS1  | -0.26869 |
| GCNT1       | -0.2688  |
| AL691432.1  | -0.26887 |
| ZNF43       | -0.26894 |
| TSNARE1     | -0.26898 |
| AL109918.1  | -0.26907 |
| NBEAL1      | -0.26911 |
| GIHCG       | -0.26915 |
| SIGLEC9     | -0.26922 |
| TP73        | -0.26935 |
| ASTN2       | -0.26939 |
| THUMPD3-AS1 | -0.26953 |
| LRRC56      | -0.26958 |
| PHYKPL      | -0.26998 |

|            |          |
|------------|----------|
| SGCA       | -0.27009 |
| CYBA       | -0.2702  |
| SNHG26     | -0.27023 |
| AC113410.1 | -0.27036 |
| AC004908.3 | -0.27067 |
| TRPM2      | -0.27082 |
| AL136295.7 | -0.27084 |
| ANO9       | -0.27087 |
| AC005253.1 | -0.27096 |
| CCDC66     | -0.27098 |
| AL049844.2 | -0.27119 |
| AP001107.4 | -0.27128 |
| TIFA       | -0.27132 |
| PIEZO2     | -0.27133 |
| SNORD62B   | -0.27138 |
| ANKAR      | -0.27153 |
| MIR3125    | -0.27167 |
| TBC1D9     | -0.27172 |
| LXN        | -0.27187 |
| SUGT1P3    | -0.27196 |
| AC123595.1 | -0.27219 |
| PARP14     | -0.27237 |
| BTN2A3P    | -0.27242 |
| HERC2P9    | -0.27254 |
| HLA-W      | -0.27272 |
| CCDC18     | -0.27282 |
| MIR3174    | -0.27299 |
| AC108673.2 | -0.273   |
| U2AF1L4    | -0.27312 |
| SNORA33    | -0.27324 |
| AC012511.1 | -0.27342 |
| AC245060.2 | -0.27347 |
| ARHGAP45   | -0.27353 |
| AC011477.1 | -0.27354 |
| SYT11      | -0.2736  |
| KIF27      | -0.27364 |
| AL513327.1 | -0.27379 |
| ATP1A3     | -0.27382 |
| CEACAM6    | -0.27385 |
| PROCA1     | -0.27387 |
| AC147067.2 | -0.274   |
| HLA-A      | -0.27404 |
| ZNF90      | -0.27412 |
| RIPPLY3    | -0.27418 |
| PCK2       | -0.27419 |
| AP000873.1 | -0.27427 |
| USHBP1     | -0.27432 |
| DCUN1D2    | -0.27434 |
| SPINK5     | -0.27435 |

|            |          |
|------------|----------|
| AC002550.2 | -0.27448 |
| AC130650.2 | -0.27451 |
| SUGT1-DT   | -0.27456 |
| AC112722.1 | -0.27457 |
| CD163L1    | -0.27475 |
| ZNF81      | -0.27475 |
| FOXN3      | -0.27515 |
| SLC6A16    | -0.27516 |
| ZNF775     | -0.27526 |
| AC079467.1 | -0.27526 |
| BCRP3      | -0.27528 |
| INE1       | -0.27528 |
| SLC19A2    | -0.27531 |
| CNTD1      | -0.27533 |
| KDM4C      | -0.27534 |
| GTF2IP14   | -0.27541 |
| ARHGDIB    | -0.27568 |
| AC095057.3 | -0.27574 |
| C3orf70    | -0.27583 |
| EYA2       | -0.27586 |
| AL121772.3 | -0.27588 |
| SEL1L3     | -0.27593 |
| SLC43A1    | -0.276   |
| IGBP1-AS1  | -0.27606 |
| PRKCQ-AS1  | -0.27617 |
| TREM2      | -0.27627 |
| AL359921.1 | -0.27632 |
| HSD17B13   | -0.27633 |
| TOX2       | -0.27653 |
| FAM13A-AS1 | -0.27654 |
| RAI2       | -0.27657 |
| ACACB      | -0.27684 |
| AC010834.3 | -0.27688 |
| ENTPD1     | -0.27693 |
| TPSB2      | -0.277   |
| RHOA-IT1   | -0.27707 |
| AP003170.3 | -0.27712 |
| CCR5AS     | -0.27719 |
| MRNIP      | -0.2772  |
| LEFTY2     | -0.27723 |
| PAOX       | -0.27732 |
| IL17C      | -0.27746 |
| AL354989.1 | -0.27758 |
| PNPLA7     | -0.27778 |
| AC242842.1 | -0.27791 |
| AC008507.1 | -0.27816 |
| AC012513.3 | -0.27818 |
| LINC00847  | -0.27819 |
| C8G        | -0.2782  |

|            |          |
|------------|----------|
| KLF2       | -0.27842 |
| RANP4      | -0.27856 |
| AP000692.1 | -0.27861 |
| PSMB10     | -0.27866 |
| RASGRF1    | -0.27872 |
| ELAPOR1    | -0.27886 |
| RPL36AP43  | -0.27903 |
| GSDMA      | -0.27905 |
| LIPM       | -0.27916 |
| SHOC1      | -0.27919 |
| GMIP       | -0.27923 |
| PLCL1      | -0.27927 |
| CALM2P2    | -0.27929 |
| FAM229B    | -0.27931 |
| AC121761.2 | -0.27932 |
| CYFIP2     | -0.27936 |
| IL3RA      | -0.27939 |
| PNISR      | -0.27952 |
| ADCY4      | -0.27963 |
| AC108215.1 | -0.27972 |
| PAG1       | -0.27977 |
| snoZ196    | -0.27978 |
| AC253536.6 | -0.27981 |
| CLK1       | -0.27985 |
| MVB12B     | -0.27991 |
| RPS29P16   | -0.27991 |
| IGLV3-29   | -0.27993 |
| MIR7856    | -0.27998 |
| SPOCK2     | -0.28    |
| TTC39C     | -0.28004 |
| RRAGD      | -0.28016 |
| CEACAM4    | -0.28017 |
| CYP7B1     | -0.28018 |
| ZNF75D     | -0.28023 |
| AC103691.1 | -0.28025 |
| CRACDL     | -0.2808  |
| ANKRD12    | -0.28082 |
| GPR143     | -0.28098 |
| AC069257.2 | -0.28099 |
| TLR6       | -0.28102 |
| DOCK3      | -0.28107 |
| PLA2G5     | -0.2813  |
| AP006621.4 | -0.28155 |
| FOSB       | -0.2816  |
| KIAA1841   | -0.28189 |
| AP003419.3 | -0.28196 |
| ANGPTL1    | -0.28197 |
| ITGAM      | -0.28233 |
| RNU6-1157P | -0.28245 |

|               |          |
|---------------|----------|
| MIR6075       | -0.28248 |
| RNU6-481P     | -0.28249 |
| AC125603.2    | -0.28263 |
| ANKRD34A      | -0.28267 |
| RPL23AP64     | -0.28267 |
| AL354893.1    | -0.28291 |
| CCDC189       | -0.28295 |
| AL451007.1    | -0.28304 |
| ANKRD35       | -0.28305 |
| ZNF266        | -0.28308 |
| NFKBIZ        | -0.28309 |
| LGMN          | -0.28328 |
| MAT1A         | -0.28341 |
| BCL2A1        | -0.2836  |
| LINC02889     | -0.28366 |
| BATF3         | -0.28369 |
| HOXB5         | -0.28375 |
| JMJD7-PLA2G4B | -0.28384 |
| C14orf28      | -0.28388 |
| ZNF700        | -0.28391 |
| GBP2          | -0.28393 |
| RAB11FIP1P1   | -0.28409 |
| AC018638.8    | -0.28438 |
| HLA-DPB2      | -0.28465 |
| AF111168.1    | -0.28469 |
| MIR6859-1     | -0.28492 |
| UVSSA         | -0.28504 |
| IGFBP2        | -0.28504 |
| AL022316.1    | -0.28514 |
| PSME2         | -0.28522 |
| FAM89A        | -0.28525 |
| MAMSTR        | -0.28533 |
| ZNF573        | -0.28544 |
| DNAH2         | -0.28545 |
| AC025048.4    | -0.28546 |
| AHSA2P        | -0.2855  |
| NSA2P3        | -0.28555 |
| RSRP1         | -0.28569 |
| RNU6-1136P    | -0.28579 |
| AC109460.2    | -0.28581 |
| TNFRSF4       | -0.2859  |
| SGK3          | -0.28605 |
| Z95152.1      | -0.28611 |
| CDKN2D        | -0.28611 |
| FMO3          | -0.28627 |
| SSR4          | -0.28634 |
| CHEK2         | -0.28645 |
| FBXW7         | -0.28647 |
| NONOP2        | -0.2865  |

|            |          |
|------------|----------|
| AC136475.8 | -0.28653 |
| CBX3P2     | -0.28676 |
| ZBTB16     | -0.28695 |
| MAP3K12    | -0.28709 |
| GPRIN2     | -0.28711 |
| MT1G       | -0.28714 |
| RAPGEF6    | -0.28716 |
| AL590326.1 | -0.28721 |
| RINL       | -0.28733 |
| CPQ        | -0.28736 |
| C16orf86   | -0.28738 |
| ALOX12     | -0.2875  |
| AL449212.1 | -0.28757 |
| MIR23A     | -0.28758 |
| DSTNP1     | -0.28777 |
| AC007038.1 | -0.28797 |
| RIPOR3     | -0.28803 |
| HMGA1P8    | -0.28805 |
| MAFA-AS1   | -0.28813 |
| HECA       | -0.28815 |
| TAS2R20    | -0.28817 |
| RFX5-AS1   | -0.28821 |
| AC048341.1 | -0.28821 |
| AKAP5      | -0.28825 |
| SNX10      | -0.28841 |
| AC007566.1 | -0.28841 |
| SLC25A27   | -0.28841 |
| ZNF710-AS1 | -0.28856 |
| LYG1       | -0.28872 |
| SC5D       | -0.28879 |
| ZNF546     | -0.28914 |
| DKK2       | -0.2892  |
| IRAK3      | -0.28923 |
| FOXP3-AS1  | -0.2893  |
| SNORD7     | -0.28957 |
| DMXL2      | -0.28968 |
| THBS4      | -0.28978 |
| UAP1L1     | -0.28979 |
| CCDC113    | -0.28983 |
| PRDX6-AS1  | -0.28988 |
| LCA5L      | -0.28995 |
| XRN1       | -0.28996 |
| CYP27A1    | -0.29006 |
| AL109614.1 | -0.29014 |
| AL135844.1 | -0.29042 |
| PSMA6      | -0.29045 |
| NIN        | -0.29045 |
| EXOSC3P1   | -0.29047 |
| MIS18BP1   | -0.29051 |



|             |          |
|-------------|----------|
| CD44-AS1    | -0.2906  |
| AL139246.3  | -0.29068 |
| AC125437.1  | -0.29075 |
| RNU6-915P   | -0.29087 |
| RCBTB2      | -0.29116 |
| RNU6-1011P  | -0.29151 |
| CCNE2       | -0.2916  |
| KHDRBS3     | -0.29165 |
| AC104695.3  | -0.29165 |
| HERC1       | -0.29171 |
| BST1        | -0.29179 |
| IRAG2       | -0.29197 |
| CARD9       | -0.29203 |
| PDCL3P4     | -0.29212 |
| HSD17B7P2   | -0.29214 |
| KLK7        | -0.29218 |
| DYNLT2      | -0.29219 |
| SERPINB3    | -0.29226 |
| AC008870.2  | -0.29227 |
| AC132938.5  | -0.29267 |
| MIR4257     | -0.2929  |
| ATF7IP2     | -0.29295 |
| AP001625.2  | -0.29298 |
| ZNF91       | -0.29319 |
| HMBOX1      | -0.29324 |
| LGI4        | -0.29326 |
| CCNO        | -0.2933  |
| AC091185.1  | -0.29362 |
| TRIM46      | -0.29365 |
| FANCM       | -0.2938  |
| BTN3A2      | -0.29388 |
| MAP3K8      | -0.2939  |
| AL136418.1  | -0.29393 |
| TSHZ2       | -0.29396 |
| WNT11       | -0.2943  |
| PIK3R1      | -0.29431 |
| ENPP2       | -0.29432 |
| SYTL5       | -0.29438 |
| CLIC2       | -0.2944  |
| SUV39H2-DT  | -0.29441 |
| SETDB2      | -0.29472 |
| ATP13A4-AS1 | -0.29477 |
| MIR4312     | -0.29481 |
| HERC5       | -0.29484 |
| AC102945.2  | -0.29491 |
| NKTR        | -0.29505 |
| MIR186      | -0.29535 |
| NFKBIA      | -0.29546 |
| CLK4        | -0.29547 |

|            |          |
|------------|----------|
| AOX1       | -0.29549 |
| DNAH14     | -0.29555 |
| AC018926.2 | -0.29556 |
| RNA5SP383  | -0.29569 |
| DND1P1     | -0.29575 |
| PILRA      | -0.29576 |
| PIWIL4     | -0.29615 |
| LIPA       | -0.29617 |
| SLC19A3    | -0.29638 |
| GAS8-AS1   | -0.29639 |
| RNF175     | -0.29646 |
| TFCP2L1    | -0.29647 |
| RTL5       | -0.29671 |
| MYO15B     | -0.29694 |
| TBC1D4     | -0.29696 |
| RELT       | -0.29714 |
| PDCD4-AS1  | -0.29716 |
| AC009120.2 | -0.29717 |
| C1QTNF3    | -0.29737 |
| DOCK11     | -0.29746 |
| DOP1A      | -0.29771 |
| CXCL12     | -0.29774 |
| COL14A1    | -0.29774 |
| FMNL3      | -0.29801 |
| CD68       | -0.2981  |
| MB         | -0.29812 |
| MIR23AHG   | -0.2982  |
| MIR548AA2  | -0.29829 |
| AC073655.2 | -0.2984  |
| ZNF615     | -0.29848 |
| IL18R1     | -0.29854 |
| AC233728.1 | -0.29861 |
| CXCL2      | -0.29886 |
| AC126544.1 | -0.29895 |
| EID2B      | -0.29901 |
| STRA6      | -0.29902 |
| APOLD1     | -0.29908 |
| EBF1       | -0.29909 |
| SEPTIN7P13 | -0.29917 |
| LRRC8C     | -0.29918 |
| SLC25A45   | -0.29947 |
| AL663070.1 | -0.2996  |
| AXIN2      | -0.29972 |
| LAMA2      | -0.29972 |
| AC020907.4 | -0.29973 |
| ASMTL-AS1  | -0.29977 |
| ZNF235     | -0.29984 |
| AC127024.4 | -0.29995 |
| CSPP1      | -0.29996 |

|              |          |
|--------------|----------|
| BBOF1        | -0.30029 |
| MTND1P23     | -0.30043 |
| AC007552.2   | -0.3008  |
| AC007014.2   | -0.30084 |
| ZFP36        | -0.3011  |
| REV3L        | -0.30116 |
| AC010531.6   | -0.3012  |
| ANKS4B       | -0.30122 |
| C1RL-AS1     | -0.30122 |
| RN7SL130P    | -0.30125 |
| AL359697.1   | -0.30126 |
| U62317.1     | -0.30131 |
| PARGP1       | -0.30159 |
| SP3P         | -0.30176 |
| KATNAL2      | -0.30188 |
| RPS29P11     | -0.3019  |
| RNU1-103P    | -0.3019  |
| FCGR3A       | -0.30217 |
| SRD5A2       | -0.30226 |
| AC010186.3   | -0.30232 |
| AC007216.4   | -0.30264 |
| MIR570       | -0.30269 |
| AC011468.5   | -0.30283 |
| TMEM67       | -0.30287 |
| MIR4284      | -0.30292 |
| RNU6-574P    | -0.30295 |
| BX539320.1   | -0.30303 |
| DGKE         | -0.30327 |
| ATP5PBP5     | -0.30381 |
| ATP1B3-AS1   | -0.30383 |
| CROCCP3      | -0.30387 |
| CKM          | -0.30393 |
| FKBP11       | -0.30395 |
| AC010201.2   | -0.30395 |
| TRAF3IP2-AS1 | -0.30424 |
| SLC51A       | -0.30425 |
| HDAC4        | -0.30432 |
| AC068790.5   | -0.30443 |
| PPP1R12B     | -0.30449 |
| PRSS36       | -0.30455 |
| C19orf38     | -0.30468 |
| ZNF100       | -0.30477 |
| TIMD4        | -0.30478 |
| CTSW         | -0.30479 |
| VCAM1        | -0.30482 |
| ATP2A1-AS1   | -0.30491 |
| SLBP-DT      | -0.30493 |
| SHPRH        | -0.30493 |
| ZNF439       | -0.305   |

|            |          |
|------------|----------|
| MMRN1      | -0.30503 |
| RAD51B     | -0.30519 |
| PPIEL      | -0.30528 |
| MAILR      | -0.30532 |
| MS4A4A     | -0.30541 |
| KPNA5      | -0.3056  |
| PREX2      | -0.30567 |
| CRYGS      | -0.30567 |
| DEGS2      | -0.30578 |
| AC093788.1 | -0.30586 |
| BNIP5      | -0.30589 |
| RAMP3      | -0.30598 |
| BOLA3-AS1  | -0.30604 |
| IPO5P1     | -0.30605 |
| UBA7       | -0.30616 |
| AC093525.8 | -0.30621 |
| AC012615.1 | -0.30628 |
| FAM167A    | -0.30632 |
| PSTPIP2    | -0.30655 |
| AC005840.4 | -0.30661 |
| SPATA17    | -0.30664 |
| AC099677.1 | -0.30683 |
| SNCAIP     | -0.30695 |
| MIR1285-1  | -0.30696 |
| CCP110     | -0.3071  |
| PGM5P4     | -0.30712 |
| METTL7A    | -0.3072  |
| AC004223.4 | -0.30721 |
| UBXN11     | -0.30726 |
| TYMP       | -0.30749 |
| LINC01644  | -0.3076  |
| GBP6       | -0.30768 |
| UBE2L6     | -0.30797 |
| AC005839.1 | -0.30834 |
| CARD16     | -0.30834 |
| AC073534.2 | -0.30847 |
| PAN3-AS1   | -0.30853 |
| SLIT3      | -0.30853 |
| ARPC3P1    | -0.3086  |
| AC004908.2 | -0.30863 |
| AC008267.3 | -0.30866 |
| CFAP44     | -0.30867 |
| OSCAR      | -0.3088  |
| AC007292.1 | -0.30889 |
| GIPR       | -0.30891 |
| PPP4R1L    | -0.30897 |
| EPSTI1     | -0.30902 |
| GPR132     | -0.30905 |
| NARF-IT1   | -0.30926 |

|            |          |
|------------|----------|
| AC004466.3 | -0.30933 |
| STAG3      | -0.30935 |
| GDF15      | -0.30944 |
| DNAJC19P5  | -0.30948 |
| CLEC1A     | -0.30953 |
| AC113139.1 | -0.30953 |
| AP001931.1 | -0.30987 |
| DGKA       | -0.3099  |
| DNALI1     | -0.30999 |
| KRR1P1     | -0.31007 |
| HS3ST3B1   | -0.31034 |
| KRT40      | -0.31049 |
| RHEX       | -0.31063 |
| VSIR       | -0.31071 |
| LYST       | -0.31073 |
| AC008969.1 | -0.3113  |
| AC245100.6 | -0.31138 |
| STK10      | -0.31179 |
| LRRC39     | -0.31181 |
| RNA5SP37   | -0.31204 |
| PLA2G6     | -0.31215 |
| RNF125     | -0.31217 |
| AL162724.1 | -0.31235 |
| TNFAIP8    | -0.31245 |
| CCDC191    | -0.31255 |
| SNX22      | -0.31258 |
| PTPN6      | -0.31302 |
| AGAP1-IT1  | -0.31333 |
| UCP2       | -0.31334 |
| TBX19      | -0.3134  |
| NFKBID     | -0.31357 |
| PSPC1-AS2  | -0.31381 |
| NDUFAF6    | -0.31382 |
| RNA5SP108  | -0.31395 |
| AADAT      | -0.31398 |
| TDRD10     | -0.31406 |
| LINC00968  | -0.31409 |
| SIGLEC7    | -0.31428 |
| MATN2      | -0.31441 |
| AC138207.4 | -0.31444 |
| ANXA2R     | -0.31463 |
| KCTD12     | -0.31488 |
| AMPD3      | -0.31516 |
| MIR6753    | -0.3152  |
| LRRC25     | -0.31526 |
| AC016717.2 | -0.31532 |
| GM2A       | -0.31536 |
| SCML1      | -0.31536 |
| PRORP      | -0.3154  |

|            |          |
|------------|----------|
| AC090114.3 | -0.31564 |
| AC009054.2 | -0.31572 |
| RNU6-140P  | -0.31582 |
| AL021578.1 | -0.31592 |
| DEPDC7     | -0.31618 |
| FAM110D    | -0.31634 |
| AP006621.2 | -0.31636 |
| ZNF780B    | -0.31645 |
| LAP3       | -0.31654 |
| KIF12      | -0.31662 |
| MIR4453HG  | -0.31668 |
| SRP54-AS1  | -0.31679 |
| LRRK1      | -0.31682 |
| AF129075.1 | -0.31683 |
| CCL22      | -0.31684 |
| CORO7      | -0.31695 |
| EGR3       | -0.31706 |
| NCALD      | -0.31706 |
| AL136295.6 | -0.31709 |
| IFI44      | -0.31733 |
| A2M-AS1    | -0.31736 |
| ZNF154     | -0.31742 |
| ASCL2      | -0.31743 |
| ERVK13-1   | -0.31746 |
| DENND3     | -0.31752 |
| AL008582.1 | -0.31765 |
| ITGAE      | -0.31779 |
| CST4       | -0.31795 |
| AC109347.2 | -0.31799 |
| MIR6730    | -0.31803 |
| AL031670.1 | -0.31812 |
| CSF2RA     | -0.31826 |
| CASS4      | -0.3183  |
| CPA6       | -0.31846 |
| STK4       | -0.31863 |
| PPP1R36    | -0.31898 |
| TLR1       | -0.31935 |
| LYNX1      | -0.31946 |
| LY75       | -0.31974 |
| NABP1      | -0.31979 |
| PPP4R3B-DT | -0.32005 |
| SNORD59A   | -0.3201  |
| AC007319.1 | -0.32018 |
| SPATA13    | -0.32021 |
| AC131649.2 | -0.32028 |
| LOXL4      | -0.32032 |
| CSF1R      | -0.32035 |
| RESF1      | -0.32041 |
| TOGARAM1   | -0.32058 |

|            |          |
|------------|----------|
| AC010329.1 | -0.32072 |
| AC245884.8 | -0.32085 |
| KAT2B      | -0.32093 |
| AC007743.1 | -0.32112 |
| NIPSNAP3B  | -0.32153 |
| TXNDC5     | -0.32164 |
| IGFL1      | -0.32193 |
| LRRC8D-DT  | -0.32207 |
| ZNF37BP    | -0.3221  |
| OGT        | -0.32246 |
| HNRNPA1P27 | -0.32247 |
| KCND2      | -0.32263 |
| CNOT6L     | -0.32284 |
| AC083862.1 | -0.32284 |
| MHENCN     | -0.3233  |
| AC091390.2 | -0.32341 |
| SEMA3G     | -0.32347 |
| FYN        | -0.32353 |
| AL596094.1 | -0.32366 |
| MEF2C      | -0.32369 |
| PTOV1-AS2  | -0.32376 |
| SYPL1P2    | -0.32377 |
| MIR135A1   | -0.32391 |
| IQGAP2     | -0.32402 |
| RFX3-AS1   | -0.32415 |
| KCND3      | -0.32427 |
| UBE2J1     | -0.32438 |
| NPIPA5     | -0.32469 |
| SNORD117   | -0.32489 |
| AC131011.1 | -0.32492 |
| AC008105.2 | -0.32505 |
| AC073149.1 | -0.32514 |
| IQCN       | -0.3252  |
| PKMP3      | -0.32529 |
| AC004067.1 | -0.32529 |
| COL21A1    | -0.32536 |
| MALT1      | -0.32543 |
| PIK3IP1    | -0.32545 |
| TRIM69     | -0.32547 |
| ACSL1      | -0.32556 |
| IL7        | -0.32566 |
| TMIGD3     | -0.32577 |
| TXNDC16    | -0.32615 |
| CYP4F29P   | -0.32617 |
| DHRS9      | -0.3262  |
| STOX1      | -0.32632 |
| THPO       | -0.32638 |
| ELN-AS1    | -0.3267  |
| AADAC      | -0.32711 |

|            |          |
|------------|----------|
| AL157394.1 | -0.32711 |
| GNA14      | -0.32725 |
| AC125603.1 | -0.32725 |
| AC020907.1 | -0.32744 |
| AC105219.1 | -0.32753 |
| SMPD3      | -0.32767 |
| AP001160.4 | -0.32797 |
| SNORA71B   | -0.328   |
| RNA5SP283  | -0.32818 |
| VN1R81P    | -0.32847 |
| HLA-C      | -0.32858 |
| ARC        | -0.3286  |
| CCDC184    | -0.32871 |
| KLF12      | -0.32887 |
| LAT2       | -0.32891 |
| AL731566.2 | -0.32896 |
| AL139421.1 | -0.32903 |
| MAOB       | -0.32913 |
| SLC38A6    | -0.32937 |
| CD163      | -0.32949 |
| AL117379.1 | -0.32954 |
| AL121839.2 | -0.32975 |
| KCNJ5      | -0.32983 |
| AC008870.5 | -0.32997 |
| ELMO1      | -0.33015 |
| FUT8-AS1   | -0.33039 |
| ZNF124     | -0.3304  |
| AK9        | -0.33055 |
| AMACR      | -0.33059 |
| BRCA1P1    | -0.33073 |
| CNTRL      | -0.33096 |
| ERAP2      | -0.33099 |
| REL        | -0.33124 |
| AL390879.1 | -0.33133 |
| MIR223HG   | -0.33139 |
| RNU7-123P  | -0.3314  |
| SOCS2      | -0.33141 |
| REM1       | -0.33171 |
| MSI1       | -0.33182 |
| GNGT2      | -0.33198 |
| THBS3-AS1  | -0.33205 |
| CPVL       | -0.33209 |
| AL139349.1 | -0.3321  |
| DDX12P     | -0.33244 |
| ZNF682     | -0.33246 |
| AL031432.2 | -0.33263 |
| AL391834.1 | -0.33274 |
| AC073487.1 | -0.333   |
| COTL1      | -0.33306 |



|            |          |
|------------|----------|
| GRK3       | -0.33308 |
| PLEKHO2    | -0.33334 |
| NR4A1AS    | -0.33349 |
| AC004492.1 | -0.3335  |
| TNFRSF19   | -0.33352 |
| CD33       | -0.33353 |
| AC005041.1 | -0.33374 |
| RAB3IP     | -0.33377 |
| GPCPD1     | -0.33393 |
| RGL1       | -0.33398 |
| ABAT       | -0.3341  |
| AC004825.2 | -0.33431 |
| SMC3P1     | -0.33439 |
| ZNF826P    | -0.33472 |
| AL049840.2 | -0.33472 |
| AC136475.2 | -0.33478 |
| KRT16P1    | -0.33481 |
| GNRH1      | -0.33489 |
| AC100830.2 | -0.33499 |
| SLC26A4    | -0.33504 |
| HLA-DRB6   | -0.33514 |
| TRPV2      | -0.3354  |
| AP003084.1 | -0.3356  |
| PGLYRP4    | -0.33566 |
| SH2D3C     | -0.33574 |
| AF117829.1 | -0.33574 |
| AL136295.2 | -0.33591 |
| TRABD2A    | -0.3362  |
| FGA        | -0.33634 |
| TNFRSF1B   | -0.33644 |
| RNU6-925P  | -0.33646 |
| CLDN11     | -0.33646 |
| AL121601.1 | -0.33689 |
| TMEM233    | -0.33691 |
| NTNG2      | -0.33727 |
| AC245884.3 | -0.33732 |
| MIR590     | -0.33744 |
| TMEM150B   | -0.33744 |
| RASGRP1    | -0.33748 |
| CST7       | -0.33754 |
| AC004253.1 | -0.33755 |
| PTPRO      | -0.33799 |
| SERPINB4   | -0.33802 |
| LILRB3     | -0.33811 |
| AP003392.2 | -0.33814 |
| RN7SL333P  | -0.33828 |
| KLK1       | -0.33865 |
| ZMAT1      | -0.33874 |
| TYROBP     | -0.33889 |

|             |          |
|-------------|----------|
| TRIM31      | -0.33889 |
| ZBTB25      | -0.33892 |
| FOXA1       | -0.33903 |
| MIR221      | -0.33912 |
| MANEA       | -0.33914 |
| TSPYL5      | -0.33928 |
| MORN3       | -0.33931 |
| AC005154.1  | -0.33935 |
| ZNF493      | -0.33952 |
| SLC8A1      | -0.33957 |
| GOLGA7B     | -0.33963 |
| GEMIN7-AS1  | -0.33968 |
| S1PR1       | -0.33977 |
| AC020658.5  | -0.33981 |
| LINC02195   | -0.33987 |
| AC087500.1  | -0.33988 |
| ST8SIA6-AS1 | -0.3399  |
| MIR3189     | -0.34021 |
| ZNF714      | -0.34031 |
| MAP3K14     | -0.34068 |
| FAM124B     | -0.34108 |
| AC008752.3  | -0.34161 |
| TSSK4       | -0.34162 |
| AC090559.1  | -0.34163 |
| LINC01730   | -0.34188 |
| SFI1        | -0.34188 |
| IL15        | -0.34206 |
| CD40        | -0.34207 |
| CAPN6       | -0.34223 |
| HPCAL4      | -0.3424  |
| MYCBP2      | -0.34249 |
| AC110792.3  | -0.34264 |
| LINC01089   | -0.3427  |
| AC011815.1  | -0.34284 |
| TMEM176A    | -0.34287 |
| SMTNL2      | -0.34301 |
| RNU7-49P    | -0.34328 |
| SLC31A2     | -0.34339 |
| ZNF66       | -0.34361 |
| LINC00653   | -0.34386 |
| LGI2        | -0.34398 |
| AC005540.1  | -0.34413 |
| SNORD63B    | -0.34443 |
| FOS         | -0.34452 |
| TTLL3       | -0.34473 |
| AP002498.1  | -0.34475 |
| GOLGA8A     | -0.34483 |
| STAT5A      | -0.34495 |
| RADX        | -0.34497 |

|            |          |
|------------|----------|
| STAB1      | -0.3452  |
| KCNJ2      | -0.34521 |
| GLYCTK     | -0.34547 |
| PPP3CC     | -0.34549 |
| SNTB1      | -0.34563 |
| AL021707.2 | -0.34566 |
| MIR320E    | -0.34579 |
| AC008268.1 | -0.34596 |
| DTX1       | -0.34631 |
| IFI44L     | -0.34634 |
| HLA-E      | -0.34664 |
| GPC3       | -0.34667 |
| CCL3       | -0.34667 |
| RNU6-807P  | -0.34682 |
| CRLF2      | -0.34684 |
| AL049552.1 | -0.34689 |
| ATP6V0D2   | -0.34692 |
| AC012615.6 | -0.34708 |
| PDE3B      | -0.34709 |
| AC027097.1 | -0.34722 |
| ALG13-AS1  | -0.34724 |
| RPL10P12   | -0.34749 |
| AC004832.5 | -0.34765 |
| SNORA68B   | -0.34766 |
| GTF2IP9    | -0.34766 |
| RNA5SP187  | -0.34777 |
| AC025287.3 | -0.34782 |
| BTN3A3     | -0.34783 |
| B3GAT1-DT  | -0.34789 |
| CD300A     | -0.3479  |
| AC067930.3 | -0.3479  |
| AC009570.1 | -0.34804 |
| BTN3A1     | -0.34837 |
| SLC4A7     | -0.34857 |
| TC2N       | -0.34876 |
| C12orf75   | -0.34881 |
| CHL1       | -0.34883 |
| SLC13A3    | -0.34925 |
| MIR3164    | -0.34927 |
| APOBEC3F   | -0.34955 |
| BRMS1L     | -0.34955 |
| MLC1       | -0.3499  |
| SYNDIG1L   | -0.35005 |
| RNA5SP317  | -0.35008 |
| BMP8A      | -0.35015 |
| AC004908.1 | -0.35029 |
| OXER1      | -0.35035 |
| FCER1G     | -0.35051 |
| C8orf37    | -0.35062 |

|            |          |
|------------|----------|
| OR7E47P    | -0.35077 |
| TMEM260    | -0.35078 |
| AC005479.2 | -0.35083 |
| SEL1L      | -0.35096 |
| HTR2B      | -0.35098 |
| IL37       | -0.35146 |
| AL031600.1 | -0.3515  |
| RELL2      | -0.35153 |
| PRKCH      | -0.35166 |
| GNAO1      | -0.35168 |
| CECR7      | -0.352   |
| AL135999.1 | -0.35238 |
| PAK3       | -0.35247 |
| ATF5       | -0.35265 |
| AC002044.1 | -0.35269 |
| AC058791.1 | -0.35281 |
| AC024580.1 | -0.35291 |
| COL28A1    | -0.35293 |
| VAV1       | -0.35294 |
| RPL5P23    | -0.35297 |
| AC108449.2 | -0.35307 |
| CYSLTR1    | -0.35315 |
| CR936218.1 | -0.35336 |
| SLC1A4     | -0.3534  |
| AP001178.2 | -0.35351 |
| MIR148A    | -0.35351 |
| FP671120.7 | -0.35356 |
| LDLRAD4    | -0.35367 |
| DPP10-AS1  | -0.35381 |
| AL590226.1 | -0.35413 |
| RTP4       | -0.35414 |
| AL022328.3 | -0.35416 |
| ATP1A2     | -0.35431 |
| AC130456.3 | -0.35437 |
| AL671277.2 | -0.3544  |
| LINC02352  | -0.35469 |
| TAS1R3     | -0.35473 |
| GADD45G    | -0.35474 |
| FAM201A    | -0.35476 |
| AL592494.2 | -0.35476 |
| MAFB       | -0.35503 |
| TMEM63C    | -0.35559 |
| MIATNB     | -0.35566 |
| CFP        | -0.3558  |
| SIRPB2     | -0.35591 |
| MIR1249    | -0.35595 |
| TAP1       | -0.35625 |
| SCUBE2     | -0.35632 |
| GRIK5      | -0.35638 |

|            |          |
|------------|----------|
| AC138207.5 | -0.35651 |
| AP1S2      | -0.35653 |
| AC025171.5 | -0.35666 |
| AL139396.1 | -0.35671 |
| MS4A7      | -0.35684 |
| AL136981.2 | -0.35696 |
| TRAV2      | -0.35701 |
| KIF1A      | -0.35702 |
| AC124312.2 | -0.35705 |
| PLPPR3     | -0.35732 |
| AC092645.1 | -0.35743 |
| AC112496.1 | -0.35745 |
| SNORA2A    | -0.35761 |
| CBLN3      | -0.35768 |
| AC048341.2 | -0.35769 |
| AC012651.1 | -0.3579  |
| SP110      | -0.35791 |
| AC027097.2 | -0.35809 |
| RPGR       | -0.35816 |
| A2M        | -0.35819 |
| MIR5685    | -0.35828 |
| HMGN1P1    | -0.35861 |
| PAX7       | -0.35861 |
| HLF        | -0.35862 |
| AL022328.4 | -0.35863 |
| POPDC2     | -0.3587  |
| QPCT       | -0.35873 |
| CPED1      | -0.35897 |
| CXCL6      | -0.35917 |
| RNU6-1053P | -0.35926 |
| AC009120.3 | -0.35929 |
| CEACAM1    | -0.35969 |
| MAP2K6     | -0.36022 |
| AL021707.6 | -0.36032 |
| ZNF589     | -0.36052 |
| SSTR1      | -0.36062 |
| GLIPR2     | -0.36129 |
| RN7SKP16   | -0.36146 |
| AC009061.2 | -0.36166 |
| AC007216.3 | -0.36169 |
| F10        | -0.36173 |
| AC002059.2 | -0.36183 |
| RNU6-415P  | -0.36197 |
| RN7SL4P    | -0.36204 |
| RUNX1T1    | -0.36207 |
| BAAT       | -0.36221 |
| DIRAS3     | -0.36227 |
| SNORD12C   | -0.36242 |
| PTPRN2     | -0.36243 |

|            |          |
|------------|----------|
| RFX2       | -0.3626  |
| AC005479.1 | -0.36275 |
| B2M        | -0.3628  |
| AC079921.2 | -0.36332 |
| CCDC28B    | -0.3634  |
| AC120349.1 | -0.36346 |
| USP2       | -0.36348 |
| LILRB2     | -0.36399 |
| ZNF486     | -0.36405 |
| TXNP6      | -0.36412 |
| TAMALIN    | -0.36414 |
| AC009090.1 | -0.36419 |
| PABPN1P1   | -0.36424 |
| NCMAP      | -0.36461 |
| ANKDD1A    | -0.36464 |
| ZFHX2      | -0.36534 |
| AC124283.4 | -0.36534 |
| BANCR      | -0.36538 |
| NRIP3      | -0.36593 |
| MIR4677    | -0.36594 |
| DZIP3      | -0.36596 |
| DAPP1      | -0.36599 |
| FCN1       | -0.36612 |
| HLA-L      | -0.36618 |
| PSMA3-AS1  | -0.36638 |
| LILRB5     | -0.36643 |
| TRANK1     | -0.36652 |
| AC010719.1 | -0.36676 |
| AC138409.2 | -0.36693 |
| RBM12B-AS1 | -0.36703 |
| CLIC6      | -0.36739 |
| ERVMER34-1 | -0.36739 |
| TPSAB1     | -0.3674  |
| AKAP7      | -0.36745 |
| UBXN10     | -0.36757 |
| ST8SIA4    | -0.36771 |
| AC097641.2 | -0.36791 |
| ZNF440     | -0.36803 |
| ZDHHC21    | -0.36803 |
| AC116914.2 | -0.3681  |
| SLCO2B1    | -0.36854 |
| MIR5581    | -0.3688  |
| KLK11      | -0.36895 |
| ARID5A     | -0.36901 |
| SETBP1     | -0.36913 |
| CCDC40     | -0.36919 |
| SESN1      | -0.36921 |
| RN7SL566P  | -0.36944 |
| VENTX      | -0.36953 |

|              |          |
|--------------|----------|
| CYLD         | -0.36975 |
| TOX3         | -0.36979 |
| C20orf197    | -0.36994 |
| NECAB1       | -0.36998 |
| RN7SL608P    | -0.37003 |
| AC005154.2   | -0.37005 |
| LPIN1        | -0.37054 |
| LILRA6       | -0.37086 |
| CTB-178M22.2 | -0.37088 |
| AL365226.1   | -0.37116 |
| C3AR1        | -0.37118 |
| NRXN3        | -0.3713  |
| S100B        | -0.37145 |
| AP000254.1   | -0.37148 |
| C1orf54      | -0.37165 |
| AC073210.1   | -0.37192 |
| MCIDAS       | -0.37207 |
| AC131212.2   | -0.37212 |
| AC010226.1   | -0.37218 |
| VPS13C       | -0.37227 |
| ETS1         | -0.3723  |
| ANKRD45      | -0.37231 |
| ELOCP19      | -0.3724  |
| MIR561       | -0.37294 |
| MAGOH2P      | -0.37306 |
| MIR126       | -0.37316 |
| PTN          | -0.37317 |
| HES6         | -0.37334 |
| DEPP1        | -0.37339 |
| RGS9         | -0.37349 |
| MAL          | -0.37349 |
| TNFRSF25     | -0.37353 |
| AC026412.3   | -0.37354 |
| SP5          | -0.37359 |
| PRAM1        | -0.37403 |
| AC020765.2   | -0.37413 |
| FMR1-IT1     | -0.37426 |
| AL109741.1   | -0.37441 |
| AC005519.1   | -0.37443 |
| VEGFD        | -0.37455 |
| AC027290.2   | -0.37462 |
| AC092279.1   | -0.37467 |
| CCDC152      | -0.37469 |
| ZNF577       | -0.3747  |
| RNU6-387P    | -0.37473 |
| ITGB2        | -0.37484 |
| AC093110.1   | -0.37492 |
| PPARGC1B     | -0.37509 |
| LSAMP        | -0.37512 |

|            |          |
|------------|----------|
| H3C4       | -0.37519 |
| ETV7       | -0.37548 |
| AC232271.1 | -0.3755  |
| DEF6       | -0.37556 |
| GNG7       | -0.37568 |
| AC138956.1 | -0.37577 |
| RASSF5     | -0.37612 |
| HLA-S      | -0.37618 |
| AC007919.1 | -0.37627 |
| RN7SKP173  | -0.37665 |
| CD83       | -0.37687 |
| TMEM255B   | -0.37697 |
| ZKSCAN2-DT | -0.37702 |
| CCDC153    | -0.37708 |
| ARHGAP4    | -0.37715 |
| NR1H3      | -0.37733 |
| COLCA1     | -0.37736 |
| CAMK2N2    | -0.37739 |
| ZNF215     | -0.37744 |
| SYNE1      | -0.37793 |
| AC117503.4 | -0.378   |
| BX293535.1 | -0.37813 |
| MIR593     | -0.37842 |
| RPL35AP5   | -0.37849 |
| HLA-DMA    | -0.37896 |
| C2CD4A     | -0.37896 |
| KLF7-IT1   | -0.37911 |
| TSPAN11    | -0.37911 |
| AC096720.1 | -0.37914 |
| AC079210.1 | -0.37954 |
| CBX7       | -0.37959 |
| HCAR1      | -0.37971 |
| MAN1A1     | -0.37979 |
| SH3BP5-AS1 | -0.37998 |
| PIK3C2G    | -0.38031 |
| FFAR4      | -0.38037 |
| HAAO       | -0.38075 |
| HLA-H      | -0.38091 |
| HLA-B      | -0.38102 |
| CUL4A      | -0.38109 |
| DES        | -0.38157 |
| MYO7A      | -0.38201 |
| MIR4324    | -0.38206 |
| SIGLEC1    | -0.38229 |
| AP001207.3 | -0.38233 |
| AC092119.2 | -0.38255 |
| LINC02036  | -0.38282 |
| AC010883.1 | -0.38304 |
| RNU7-40P   | -0.38318 |



|            |          |
|------------|----------|
| TMEM119    | -0.38322 |
| LGALS9     | -0.3842  |
| ENPP3      | -0.38424 |
| CLEC7A     | -0.38431 |
| NXPE3      | -0.38437 |
| Z82243.1   | -0.38442 |
| HCP5       | -0.38481 |
| MIR29B2CHG | -0.38484 |
| NPHP1      | -0.38518 |
| ORAOV1P1   | -0.38551 |
| LRP5L      | -0.386   |
| RNY4P19    | -0.3861  |
| MNDA       | -0.38621 |
| SPATA6L    | -0.38634 |
| AC124067.2 | -0.38641 |
| AL590723.1 | -0.38642 |
| GPSM3      | -0.38648 |
| AL021707.3 | -0.38656 |
| ZNF708     | -0.38667 |
| CASQ2      | -0.38695 |
| ITGA8      | -0.38715 |
| EFHC1      | -0.38726 |
| CCR10      | -0.3873  |
| IGFBPL1    | -0.38736 |
| MIR600HG   | -0.38754 |
| KHDRBS2    | -0.38773 |
| DNAJC12    | -0.3878  |
| AC007490.1 | -0.38829 |
| BPIFA1     | -0.3883  |
| HOXB8      | -0.38871 |
| IRF1       | -0.38874 |
| C4BPB      | -0.38926 |
| MNS1       | -0.38931 |
| AC011445.1 | -0.38931 |
| MIR222HG   | -0.38958 |
| AC114748.1 | -0.3897  |
| AC026704.1 | -0.39024 |
| AC084337.1 | -0.39149 |
| MAPK10     | -0.3915  |
| PLAAT2     | -0.39185 |
| AC016590.2 | -0.39192 |
| CACNA1D    | -0.3921  |
| SYK        | -0.39239 |
| HDAC4-AS1  | -0.39241 |
| TNXB       | -0.39244 |
| CCDC200    | -0.39279 |
| SEC31B     | -0.39313 |
| APOBEC3A   | -0.39323 |
| SLC15A3    | -0.39329 |

|            |          |
|------------|----------|
| SPEF2      | -0.39372 |
| FMO5       | -0.39407 |
| SMAD9      | -0.39421 |
| AC026979.2 | -0.39423 |
| LINC00852  | -0.39456 |
| RTKN2      | -0.395   |
| FPR3       | -0.39528 |
| TSPOAP1    | -0.39531 |
| AC055822.1 | -0.39546 |
| CBFA2T3    | -0.39582 |
| CRYM       | -0.39593 |
| CAPN3      | -0.39605 |
| NPTN-IT1   | -0.3961  |
| FAM178B    | -0.39611 |
| STAC3      | -0.39621 |
| GPR34      | -0.3964  |
| BMP2K      | -0.3965  |
| CCND2      | -0.39651 |
| DPT        | -0.39652 |
| NRROS      | -0.39662 |
| AC009974.1 | -0.39671 |
| SNORA16B   | -0.39696 |
| RASGEF1B   | -0.397   |
| LINC02418  | -0.39712 |
| INMT       | -0.39712 |
| RPRM       | -0.39725 |
| RAB39A     | -0.39729 |
| EGR2       | -0.39767 |
| RPL11P3    | -0.39861 |
| ZNF726     | -0.39876 |
| PDE4B      | -0.39878 |
| SYNPO2     | -0.39958 |
| DPY19L1P2  | -0.39976 |
| RAC2       | -0.40021 |
| ZNF366     | -0.40021 |
| LHFPL3     | -0.40025 |
| COL22A1    | -0.40041 |
| CEP126     | -0.40083 |
| SKAP1      | -0.40098 |
| ZDHHC11B   | -0.40106 |
| ASGR1      | -0.40126 |
| AP000786.1 | -0.40142 |
| SNORA66    | -0.40148 |
| AL021707.4 | -0.40177 |
| PPP1R3E    | -0.40178 |
| THEMIS2    | -0.40187 |
| PDCD1LG2   | -0.40202 |
| RN7SL81P   | -0.40202 |
| CTSS       | -0.40223 |

|            |          |
|------------|----------|
| CDH6       | -0.40231 |
| AC141273.2 | -0.40237 |
| ANKDD1B    | -0.40242 |
| PLEKHO1    | -0.40285 |
| AC099518.1 | -0.40288 |
| LRP2BP     | -0.40296 |
| ITIH5      | -0.4031  |
| GRAP       | -0.40313 |
| AC093809.1 | -0.40322 |
| EBLN2      | -0.40335 |
| AL359513.1 | -0.40336 |
| LRP4       | -0.40371 |
| AC139769.1 | -0.4038  |
| TCAF2      | -0.40385 |
| KCNA3      | -0.40386 |
| LPAR6      | -0.40393 |
| CLDND2     | -0.40397 |
| EFHC2      | -0.40402 |
| MS4A14     | -0.40415 |
| LGR6       | -0.40421 |
| FOXJ1      | -0.40422 |
| AC066613.1 | -0.40439 |
| AL357500.2 | -0.40477 |
| PELI2      | -0.40487 |
| HELB       | -0.40493 |
| HAVCR2     | -0.40551 |
| CCDC69     | -0.40554 |
| ODF3B      | -0.40555 |
| ATP5PDP4   | -0.40563 |
| SLC2A6     | -0.40588 |
| RNU6-1165P | -0.4059  |
| ZNF540     | -0.40646 |
| MGAT4A     | -0.40667 |
| HS1BP3-IT1 | -0.40691 |
| TMEM176B   | -0.4071  |
| LINC01150  | -0.40721 |
| AL160271.2 | -0.40734 |
| KIAA1755   | -0.40736 |
| AC118344.2 | -0.40744 |
| RNU6-322P  | -0.40805 |
| AL450263.1 | -0.4081  |
| SCN7A      | -0.40826 |
| AC087385.1 | -0.40836 |
| PIGR       | -0.40925 |
| MTND4P24   | -0.4093  |
| AC037198.2 | -0.4093  |
| LINC00893  | -0.40988 |
| LINC00987  | -0.4102  |
| C1orf162   | -0.41057 |

|              |          |
|--------------|----------|
| AP003717.1   | -0.41081 |
| TM6SF1       | -0.41172 |
| AL359076.1   | -0.41185 |
| STAT4        | -0.41207 |
| PI16         | -0.4122  |
| RNU6-1280P   | -0.41228 |
| AL357054.4   | -0.41241 |
| ATM          | -0.41266 |
| RTN1         | -0.41272 |
| AC132192.2   | -0.41299 |
| ADAM28       | -0.41318 |
| AC084018.1   | -0.41322 |
| AC069366.1   | -0.41327 |
| HOXB-AS1     | -0.41328 |
| FCGR1A       | -0.41357 |
| ACADL        | -0.41358 |
| AC010536.2   | -0.41376 |
| AC111149.2   | -0.41439 |
| AC002128.2   | -0.41443 |
| GPRASP1      | -0.41449 |
| DOK2         | -0.41456 |
| LEF1         | -0.4147  |
| ZEB2         | -0.41498 |
| FNBP1        | -0.41512 |
| STX11        | -0.41512 |
| AC023818.1   | -0.41514 |
| XG           | -0.41514 |
| LCN2         | -0.41531 |
| AC027559.1   | -0.41558 |
| NTS          | -0.41569 |
| TNFRSF14-AS1 | -0.41603 |
| TNFAIP3      | -0.41607 |
| WAKMAR2      | -0.41614 |
| CD300LF      | -0.41618 |
| HK3          | -0.41631 |
| TFDP1        | -0.41631 |
| TLDC2        | -0.4165  |
| CKS1BP1      | -0.41654 |
| AL159169.2   | -0.41679 |
| AC138932.4   | -0.41702 |
| SAMHD1       | -0.41746 |
| CCDC96       | -0.41752 |
| RASSF4       | -0.41769 |
| LINC01556    | -0.41784 |
| RNF166       | -0.41793 |
| KHDC1L       | -0.41804 |
| IL34         | -0.41831 |
| ANO5         | -0.41834 |
| MOK          | -0.4186  |

|             |          |
|-------------|----------|
| SPI1        | -0.41867 |
| LY96        | -0.41876 |
| NUPR1       | -0.41901 |
| ST6GAL1     | -0.41936 |
| RAB36       | -0.41951 |
| H2BC18      | -0.41953 |
| IL33        | -0.41969 |
| PIK3CD      | -0.41974 |
| PSMB9       | -0.41987 |
| TTC39B      | -0.41992 |
| AL731567.1  | -0.42005 |
| AC009533.1  | -0.4204  |
| C1QC        | -0.42068 |
| PLXNC1      | -0.42076 |
| AC053513.2  | -0.42092 |
| MMP19       | -0.42107 |
| AL137782.1  | -0.42116 |
| SCAANT1     | -0.42128 |
| GPRIN3      | -0.42141 |
| RUNDC3A     | -0.42151 |
| TNFRSF14    | -0.4216  |
| AC243964.3  | -0.4218  |
| RPL7AP64    | -0.42221 |
| RNU6ATAC18P | -0.42222 |
| FER1L4      | -0.42224 |
| MS4A2       | -0.42229 |
| HAPLN3      | -0.42284 |
| CKMT2       | -0.42309 |
| C16orf71    | -0.42318 |
| SNORA65     | -0.42338 |
| PDK4        | -0.42341 |
| AL139407.1  | -0.42343 |
| ZNF683      | -0.42371 |
| SLC7A7      | -0.42372 |
| RNU6-652P   | -0.42377 |
| RNU4-78P    | -0.42378 |
| CARD8       | -0.42409 |
| SOWAHD      | -0.42478 |
| AC093278.2  | -0.42479 |
| AC096733.2  | -0.42493 |
| TAS2R15P    | -0.42496 |
| ITPR2       | -0.42507 |
| SIDT1       | -0.42533 |
| CERKL       | -0.42536 |
| HABP2       | -0.4255  |
| AC009133.1  | -0.4257  |
| ACP5        | -0.42576 |
| TLR4        | -0.42584 |
| APOL6       | -0.42615 |

|             |          |
|-------------|----------|
| MFAP4       | -0.42619 |
| ETV7-AS1    | -0.42666 |
| SEMA4D      | -0.42706 |
| ABCA5       | -0.42723 |
| CAPS2       | -0.42725 |
| RNU6-610P   | -0.42736 |
| MAN1C1      | -0.42744 |
| DYNC2H1     | -0.42801 |
| AIF1        | -0.42803 |
| SNORA69     | -0.4281  |
| PRKAR1B-AS1 | -0.42845 |
| AC253536.3  | -0.42851 |
| RENB        | -0.4286  |
| PLD4        | -0.42861 |
| CCDC88C     | -0.4291  |
| AC027644.2  | -0.42971 |
| MIR4768     | -0.42978 |
| STAT1       | -0.42979 |
| AP001992.1  | -0.42981 |
| MIR3677     | -0.42985 |
| RASGRP3     | -0.42986 |
| SEPTIN6     | -0.42988 |
| EFCAB13     | -0.42988 |
| CHRNA1      | -0.42997 |
| CLEC4A      | -0.43021 |
| JAK2        | -0.43048 |
| RNU6-8      | -0.43121 |
| AC087284.1  | -0.43123 |
| CASP1       | -0.4315  |
| AL353622.1  | -0.43155 |
| IVL         | -0.43206 |
| UBE2FP3     | -0.43211 |
| RNU6-1048P  | -0.43225 |
| LINC01679   | -0.4325  |
| GYPC        | -0.43258 |
| PTGFR       | -0.43258 |
| SUSD3       | -0.43264 |
| C9orf72     | -0.43272 |
| CFAP69      | -0.43335 |
| TTLL7       | -0.43409 |
| TMEM231     | -0.43451 |
| MIRLET7D    | -0.43512 |
| AC010542.5  | -0.43515 |
| CHST1       | -0.43522 |
| RAP1AP      | -0.43577 |
| CH25H       | -0.43589 |
| AL031716.1  | -0.43591 |
| AC002128.1  | -0.43641 |
| ASRGL1      | -0.43676 |

|            |          |
|------------|----------|
| H2BC8      | -0.43678 |
| MBL1P      | -0.43777 |
| MTMR9LP    | -0.43808 |
| ATG16L2    | -0.43841 |
| AC108727.1 | -0.43859 |
| MLLT11     | -0.43897 |
| SFTPC      | -0.43943 |
| AL662844.4 | -0.43949 |
| PIH1D2     | -0.43973 |
| AL353804.1 | -0.43974 |
| TPSD1      | -0.44035 |
| SUN3       | -0.44056 |
| FAM96AP2   | -0.44072 |
| AL132989.1 | -0.44079 |
| RNU6-611P  | -0.44095 |
| SAMD9L     | -0.44115 |
| SNORA60    | -0.44153 |
| GAS7       | -0.44169 |
| PHACTR3    | -0.44186 |
| AC106782.4 | -0.44239 |
| FENDRR     | -0.44245 |
| LYL1       | -0.44249 |
| GCH1       | -0.44256 |
| GDF10      | -0.44256 |
| AC092535.5 | -0.44266 |
| CD86       | -0.44282 |
| AL157392.4 | -0.44283 |
| SMKR1      | -0.44301 |
| RN7SL481P  | -0.44315 |
| PKNOX2     | -0.44323 |
| ERICH5     | -0.44326 |
| H2BC11     | -0.44327 |
| GSTM5      | -0.44377 |
| AC025171.3 | -0.44383 |
| FXD1       | -0.44384 |
| SNORA13    | -0.44419 |
| GNG2       | -0.44419 |
| PDK1       | -0.44448 |
| ALDH1L2    | -0.44467 |
| MIR1270    | -0.44468 |
| PTGER4     | -0.44481 |
| AC139795.1 | -0.44482 |
| LAPTM5     | -0.4449  |
| H2AC8      | -0.44501 |
| DUOX2      | -0.44504 |
| MATK       | -0.44512 |
| GBP1       | -0.44517 |
| P2RY14     | -0.44521 |
| MMP13      | -0.44597 |

|            |          |
|------------|----------|
| HNF1A-AS1  | -0.44636 |
| SAMD15     | -0.44706 |
| DNAJB13    | -0.44731 |
| MMP12      | -0.44752 |
| AC005785.2 | -0.44774 |
| PLAC4      | -0.44797 |
| BEND5      | -0.44828 |
| XPC-AS1    | -0.44849 |
| ITPRID1    | -0.44892 |
| NFATC2     | -0.44918 |
| DDHD1      | -0.44934 |
| RN7SL5P    | -0.44948 |
| RN7SKP287  | -0.44962 |
| AC006059.1 | -0.45    |
| FMO2       | -0.45003 |
| DPYD-AS1   | -0.45098 |
| PTPRN      | -0.45116 |
| LSP1       | -0.45187 |
| BTN2A2     | -0.45191 |
| XIST       | -0.45252 |
| AC008906.1 | -0.45258 |
| MIR548AA1  | -0.45278 |
| HLA-DRB1   | -0.45282 |
| KLRF1      | -0.45283 |
| KIF1C-AS1  | -0.4529  |
| C4orf47    | -0.45323 |
| SLC6A1     | -0.45371 |
| AC068790.3 | -0.45398 |
| STK33      | -0.45418 |
| MPP1       | -0.45425 |
| AC083843.3 | -0.4543  |
| LINC02345  | -0.45435 |
| MICAL1     | -0.45504 |
| MAPK15     | -0.45508 |
| TSPAN33    | -0.45552 |
| CACNA2D1   | -0.45557 |
| PRR29      | -0.45557 |
| AL365361.1 | -0.45589 |
| SMIM31     | -0.45593 |
| LINC01214  | -0.45597 |
| RNU7-171P  | -0.45604 |
| AC063961.1 | -0.45625 |
| SCAMP5     | -0.45632 |
| AC115989.1 | -0.45641 |
| CD74       | -0.45672 |
| AK8        | -0.45697 |
| AC012368.1 | -0.45702 |
| AL096865.1 | -0.45703 |
| BLNK       | -0.45731 |



|              |          |
|--------------|----------|
| TRAF5        | -0.45781 |
| PTK2B        | -0.45913 |
| SNRPGP14     | -0.45918 |
| H4-16        | -0.45924 |
| SELPLG       | -0.45949 |
| LY86         | -0.45988 |
| SAP30L-AS1   | -0.46025 |
| TRAF1        | -0.4605  |
| AC116407.2   | -0.46116 |
| ATP8B4       | -0.46117 |
| FCGR1CP      | -0.46127 |
| AC008897.1   | -0.46147 |
| PDE1B        | -0.46166 |
| CD7          | -0.46176 |
| ACSS3        | -0.46187 |
| ITM2A        | -0.46209 |
| BMPER        | -0.46231 |
| SLC2A5       | -0.46236 |
| PLA2G4C      | -0.46242 |
| RNU6-407P    | -0.4627  |
| CCL18        | -0.46278 |
| RPL7AP10     | -0.46307 |
| AL133370.1   | -0.46308 |
| GRIN3B       | -0.46363 |
| AC233300.1   | -0.4638  |
| ADAMTSL4-AS1 | -0.46393 |
| N4BP2L1      | -0.46413 |
| AC062037.2   | -0.46455 |
| GFRA1        | -0.46459 |
| RIBC1        | -0.46462 |
| LINC01943    | -0.46488 |
| RNVU1-32     | -0.46546 |
| PIK3R6       | -0.46549 |
| RNU7-140P    | -0.46587 |
| LRRC34       | -0.46594 |
| IL18BP       | -0.46626 |
| TSGA10       | -0.46632 |
| AL163051.1   | -0.46639 |
| PTPRN2-AS1   | -0.46652 |
| TMEM229B     | -0.46692 |
| TRGC2        | -0.46708 |
| MLXP1        | -0.46726 |
| DAPL1        | -0.46746 |
| IQCG         | -0.46756 |
| GGTA1        | -0.46759 |
| STARD9       | -0.46761 |
| RXRG         | -0.46849 |
| DUOXA2       | -0.46869 |
| EVL          | -0.46875 |

|            |          |
|------------|----------|
| HCG27      | -0.46896 |
| PLCB2      | -0.46984 |
| AC012467.1 | -0.47009 |
| TNFRSF9    | -0.47035 |
| TMEM150C   | -0.47036 |
| CXCL17     | -0.47043 |
| PKIG       | -0.47052 |
| GRB14      | -0.47052 |
| ITPRIPL1   | -0.47068 |
| CMAHP      | -0.47128 |
| LRRC36     | -0.47154 |
| AF131215.6 | -0.47154 |
| BTG2       | -0.47193 |
| FAM227A    | -0.47252 |
| CEACAM5    | -0.47327 |
| PPM1K      | -0.47368 |
| FSD1L      | -0.47445 |
| HLA-F      | -0.47535 |
| AP000866.3 | -0.47558 |
| MTRNR2L8   | -0.47595 |
| AP001381.1 | -0.47621 |
| LRRC37A4P  | -0.47648 |
| CYP4Z2P    | -0.47664 |
| CHRD1      | -0.4767  |
| CEP85L     | -0.47679 |
| C9orf116   | -0.47688 |
| LST1       | -0.47705 |
| AC016831.1 | -0.47708 |
| AC048344.4 | -0.47745 |
| FLT3LG     | -0.4775  |
| TNFAIP8L2  | -0.47773 |
| RFX3       | -0.47783 |
| SNORD53B   | -0.47839 |
| RNF213-AS1 | -0.47858 |
| RNY1P13    | -0.47867 |
| ATP8A2     | -0.47955 |
| LINC02398  | -0.47985 |
| RN7SKP70   | -0.47988 |
| MIR548AT   | -0.47991 |
| ADCY6-DT   | -0.48042 |
| AC067817.2 | -0.48094 |
| AC005722.2 | -0.48124 |
| CCL3L3     | -0.48132 |
| HLA-DQA2   | -0.48133 |
| RIMKLBP2   | -0.48174 |
| PTPN22     | -0.48177 |
| SLC9A9     | -0.48217 |
| FAIM2      | -0.48262 |
| RIC3       | -0.48299 |

|            |          |
|------------|----------|
| AC012557.1 | -0.48305 |
| AC005332.4 | -0.48333 |
| AC124283.3 | -0.48357 |
| FILIP1     | -0.48369 |
| AC138393.2 | -0.48388 |
| IFFO1      | -0.48431 |
| AL353763.2 | -0.48441 |
| SPRR1B     | -0.4848  |
| MYRIP      | -0.48485 |
| PDE4DIPP2  | -0.48506 |
| AC104958.2 | -0.48518 |
| TSC22D3    | -0.48525 |
| RNU6-418P  | -0.48568 |
| BPIFB1     | -0.48583 |
| AL049776.1 | -0.48646 |
| IHH        | -0.48664 |
| AURKC      | -0.48696 |
| TXK        | -0.48702 |
| AC008770.3 | -0.48724 |
| IGFLR1     | -0.48757 |
| RN7SL431P  | -0.48765 |
| CHMP4BP1   | -0.48817 |
| LIN7A      | -0.48818 |
| HLA-DQB1   | -0.48844 |
| CD1C       | -0.48904 |
| TFF3       | -0.48914 |
| AC027020.2 | -0.48925 |
| PRKCQ      | -0.48962 |
| RNU7-3P    | -0.48988 |
| ARMH1      | -0.48988 |
| RGS7       | -0.49014 |
| NME5       | -0.49026 |
| CFAP300    | -0.49026 |
| AL355075.2 | -0.49066 |
| PLEKHS1    | -0.49087 |
| SFMBT2     | -0.49131 |
| RASSF2     | -0.49178 |
| C2orf88    | -0.49213 |
| RNU4-47P   | -0.49226 |
| DNAH5      | -0.49246 |
| CD101      | -0.49256 |
| MIR4477B   | -0.49274 |
| HERPUD1    | -0.49283 |
| CDC14A     | -0.49286 |
| DOK6       | -0.493   |
| NPC1L1     | -0.49329 |
| IFI30      | -0.49343 |
| RNU6-658P  | -0.49408 |
| C1QB       | -0.49425 |

|             |          |
|-------------|----------|
| PIK3AP1     | -0.49509 |
| STUM        | -0.49524 |
| PLAAT5      | -0.49555 |
| HSH2D       | -0.49563 |
| AC130456.2  | -0.49611 |
| PIPOX       | -0.49652 |
| KCNAB2      | -0.49656 |
| SLC1A3      | -0.49657 |
| SNORA5C     | -0.49698 |
| ITGB2-AS1   | -0.4973  |
| S1PR4       | -0.49771 |
| AC004921.1  | -0.49808 |
| AC092279.2  | -0.49843 |
| SMIM10L2A   | -0.49856 |
| C1QA        | -0.49866 |
| AC107464.2  | -0.49928 |
| PAPLN       | -0.49931 |
| AC108134.4  | -0.49936 |
| CHGA        | -0.49941 |
| AC109326.1  | -0.49978 |
| GIMAP2      | -0.50003 |
| NLRP3       | -0.50007 |
| RN7SL145P   | -0.50011 |
| AL606834.2  | -0.50027 |
| KLHDC7B-DT  | -0.50032 |
| HS3ST6      | -0.50033 |
| WIPF1       | -0.50038 |
| PCAT19      | -0.50042 |
| RNASE6      | -0.50069 |
| AC007546.1  | -0.50123 |
| SIGLEC14    | -0.50208 |
| CD4         | -0.50209 |
| SMAP2       | -0.50222 |
| RNU6-856P   | -0.50226 |
| AC005632.3  | -0.50235 |
| PRDX3P1     | -0.50244 |
| NCF4        | -0.5026  |
| MMP9        | -0.50282 |
| PLEKHH2     | -0.5029  |
| CFTR        | -0.50304 |
| CSTA        | -0.50308 |
| AC120498.2  | -0.5036  |
| BHLHE40-AS1 | -0.50371 |
| ABI3        | -0.50394 |
| AL021707.8  | -0.5043  |
| AL021707.7  | -0.50444 |
| AC098591.3  | -0.50462 |
| RNU6-883P   | -0.505   |
| AL136115.2  | -0.50512 |

|             |          |
|-------------|----------|
| VNN2        | -0.50556 |
| TCF21       | -0.50558 |
| HIF1A-AS3   | -0.50558 |
| CAMP        | -0.50619 |
| AC080162.1  | -0.50633 |
| MS4A6A      | -0.50641 |
| PTPRZ1      | -0.5066  |
| MAL2-AS1    | -0.50693 |
| AL513320.1  | -0.50718 |
| HS3ST2      | -0.50725 |
| RNU6-94P    | -0.50743 |
| PBX4        | -0.50745 |
| CLEC12A     | -0.50756 |
| HLA-DRB5    | -0.50819 |
| P2RX7       | -0.50879 |
| CD1E        | -0.50898 |
| TFAP2E-AS1  | -0.50929 |
| RRN3P1      | -0.50935 |
| UST-AS2     | -0.50975 |
| NPL         | -0.50987 |
| F11         | -0.51022 |
| LAIR1       | -0.51091 |
| NMUR1       | -0.51102 |
| AC026470.2  | -0.51109 |
| AC137894.1  | -0.51117 |
| UGT2B7      | -0.51211 |
| N4BP2L2-IT2 | -0.51215 |
| INTS6L      | -0.51423 |
| CA3         | -0.51499 |
| FGR         | -0.51545 |
| ALOX15      | -0.51552 |
| RNU6-1010P  | -0.51619 |
| FRZB        | -0.51622 |
| SNORD63     | -0.51646 |
| KIF21B      | -0.51677 |
| NEAT1       | -0.51691 |
| AC127002.1  | -0.51704 |
| AC026202.2  | -0.51749 |
| CATSPERB    | -0.518   |
| LRRC4       | -0.51802 |
| COLEC11     | -0.51826 |
| MFNG        | -0.51863 |
| AGER        | -0.51883 |
| PREX1       | -0.51904 |
| AC022706.1  | -0.51921 |
| VN1R83P     | -0.51956 |
| PPIAP51     | -0.51963 |
| SLC6A4      | -0.51977 |
| IL2RA       | -0.52001 |

|            |          |
|------------|----------|
| ADRB2      | -0.52069 |
| HLA-DRA    | -0.52083 |
| AC125611.1 | -0.52139 |
| AP002907.1 | -0.52241 |
| RNY1P16    | -0.52339 |
| APBB1IP    | -0.52347 |
| RAB37      | -0.5238  |
| AC020978.9 | -0.52409 |
| AL133330.1 | -0.52437 |
| AC032044.2 | -0.52455 |
| KRT14      | -0.52462 |
| AC010970.1 | -0.52486 |
| CEP128     | -0.52495 |
| MIR378H    | -0.52546 |
| RNU6-195P  | -0.52595 |
| SYP        | -0.52699 |
| NPM1P25    | -0.52759 |
| XAF1       | -0.52779 |
| NFAM1      | -0.52837 |
| SAA1       | -0.52878 |
| RIMKLA     | -0.52903 |
| CHI3L2     | -0.52933 |
| HTR3A      | -0.52991 |
| AF131215.5 | -0.53103 |
| FZD9       | -0.53122 |
| AL157786.1 | -0.53124 |
| FCN3       | -0.53173 |
| NLRP1      | -0.53206 |
| MARCHF1    | -0.53221 |
| NEUROD1    | -0.53222 |
| PLEKHG7    | -0.53244 |
| TRBV30     | -0.53291 |
| CCL4L2     | -0.53297 |
| IL10       | -0.53299 |
| AC027801.1 | -0.53449 |
| AC022733.1 | -0.53474 |
| GPR162     | -0.53493 |
| SELP       | -0.5355  |
| GPNMB      | -0.53554 |
| AL513008.1 | -0.53608 |
| HVCN1      | -0.53615 |
| MIPOL1     | -0.53636 |
| AC243967.2 | -0.53637 |
| HLA-DPB1   | -0.53649 |
| FCRL6      | -0.53662 |
| ZNF101     | -0.53683 |
| RNU6-595P  | -0.53721 |
| AC010761.3 | -0.53788 |
| NPM2       | -0.53799 |

|            |          |
|------------|----------|
| ARMC2      | -0.53807 |
| SOCS1      | -0.5382  |
| RNU6-833P  | -0.53872 |
| B3GALT2    | -0.53872 |
| RN7SL834P  | -0.53884 |
| MPEG1      | -0.53925 |
| AL512791.1 | -0.53946 |
| NPTX1      | -0.53958 |
| CYBB       | -0.54005 |
| AC104984.4 | -0.54041 |
| SOX14      | -0.54114 |
| SSX1       | -0.54129 |
| KLHL13     | -0.54148 |
| DHRS2      | -0.54173 |
| AC244197.2 | -0.54208 |
| RNU6-216P  | -0.54211 |
| AC006270.1 | -0.54309 |
| AL138721.1 | -0.54333 |
| SCARA5     | -0.5445  |
| PRF1       | -0.54477 |
| MIR374B    | -0.54575 |
| MT-TM      | -0.54628 |
| AL662844.3 | -0.54633 |
| TRIM22     | -0.54652 |
| GIMAP6     | -0.54705 |
| PLCL2      | -0.54719 |
| AC083843.2 | -0.54852 |
| AC012236.1 | -0.54854 |
| FERMT3     | -0.5486  |
| TRDV1      | -0.54882 |
| AC018926.3 | -0.54913 |
| RIPOR2     | -0.54922 |
| RORA       | -0.54922 |
| AC005674.1 | -0.54944 |
| TLR7       | -0.54945 |
| ATP2A3     | -0.55009 |
| AL138963.1 | -0.55012 |
| SFTPD      | -0.5502  |
| GPIHBP1    | -0.55025 |
| GIMAP8     | -0.55042 |
| ANKRD36    | -0.55047 |
| CAPS       | -0.55061 |
| AC008760.2 | -0.55075 |
| AC002480.1 | -0.55087 |
| GPR141     | -0.55097 |
| MMP25      | -0.55113 |
| FLI1       | -0.55129 |
| CARD8-AS1  | -0.55218 |
| PRRT2      | -0.55262 |

|            |          |
|------------|----------|
| CMKLR1     | -0.55408 |
| AC016957.2 | -0.5543  |
| GBP1P1     | -0.55501 |
| LINC02166  | -0.55526 |
| HLA-DPA1   | -0.55581 |
| SNORA31    | -0.55593 |
| EAF2       | -0.55687 |
| AC090181.2 | -0.55709 |
| DNAH11     | -0.55716 |
| LINC02888  | -0.55726 |
| AL157935.2 | -0.55749 |
| DHDDS-AS1  | -0.5575  |
| RNU7-75P   | -0.55775 |
| CD38       | -0.55805 |
| RALGAPA1   | -0.55812 |
| AL079303.1 | -0.55813 |
| PROX1      | -0.55822 |
| GPR155     | -0.55825 |
| CD80       | -0.55849 |
| RNA5SP498  | -0.55858 |
| NRN1       | -0.55967 |
| LCP1       | -0.56228 |
| AL135999.3 | -0.5626  |
| SEMA3E     | -0.56272 |
| RNU6-1262P | -0.56275 |
| PDE6G      | -0.56332 |
| RPL29P14   | -0.56342 |
| ADCY5      | -0.56353 |
| TMEM273    | -0.56383 |
| HCST       | -0.56459 |
| HCLS1      | -0.56459 |
| CES3       | -0.56463 |
| AL445493.3 | -0.56491 |
| SCNN1G     | -0.56505 |
| ITGA4      | -0.56534 |
| RN7SL8P    | -0.56542 |
| RNU4-62P   | -0.56562 |
| AC090948.1 | -0.56606 |
| IRF9       | -0.56727 |
| HCAR2      | -0.56738 |
| PLAAT4     | -0.56761 |
| AC011447.7 | -0.56821 |
| PRAP1      | -0.56916 |
| ATP10B     | -0.56933 |
| TRGV7      | -0.57009 |
| HLA-DQB2   | -0.57035 |
| AP001458.1 | -0.57061 |
| DUSP2      | -0.57132 |
| MYO1F      | -0.57157 |



|            |          |
|------------|----------|
| RNU6-853P  | -0.57186 |
| SERPIND1   | -0.57229 |
| RPS15AP16  | -0.57236 |
| AK3P5      | -0.57259 |
| DNAAF3     | -0.57272 |
| TRPC6      | -0.57297 |
| AL049869.2 | -0.57298 |
| AL135818.1 | -0.57366 |
| AC133065.3 | -0.57385 |
| DCSTAMP    | -0.5742  |
| RSPH9      | -0.57466 |
| PPIAP91    | -0.57476 |
| AP001767.3 | -0.57479 |
| ADGRV1     | -0.57494 |
| LIMD2      | -0.57495 |
| AL049840.6 | -0.57583 |
| ITLN2      | -0.57609 |
| HLA-DMB    | -0.57694 |
| CEACAM21   | -0.57709 |
| BHLHE22    | -0.57742 |
| TCF7       | -0.57784 |
| AC090739.1 | -0.57806 |
| MIR30C2    | -0.57807 |
| GCSAM      | -0.5781  |
| LPXN       | -0.57815 |
| LCP2       | -0.57828 |
| GNG4       | -0.57847 |
| CILP       | -0.57856 |
| CCL4       | -0.57875 |
| DMBT1      | -0.57916 |
| VAMP1      | -0.58156 |
| MAP6       | -0.58165 |
| BHLHA15    | -0.58234 |
| LIMS1-AS1  | -0.58271 |
| IL36RN     | -0.58282 |
| SNORD93    | -0.58287 |
| PTCRA      | -0.58312 |
| FCGR2B     | -0.58334 |
| SLC23A1    | -0.58355 |
| TDO2       | -0.58376 |
| GNG8       | -0.58392 |
| COLGALT2   | -0.58404 |
| EPYC       | -0.58454 |
| MTATP8P2   | -0.58465 |
| RGS18      | -0.58477 |
| FAM81B     | -0.58562 |
| SENCR      | -0.58597 |
| APOC1      | -0.586   |
| TUBB2B     | -0.58602 |

|              |          |
|--------------|----------|
| SNORA55      | -0.58698 |
| S100A7       | -0.58739 |
| ICA1L        | -0.58772 |
| HSD11B1      | -0.5879  |
| PGLYRP3      | -0.58872 |
| SLC22A4      | -0.58892 |
| KANSL1L-AS1  | -0.58957 |
| AC087276.1   | -0.58979 |
| MIR3671      | -0.58984 |
| TMEM178A     | -0.58993 |
| DZIP1L       | -0.59007 |
| CDH26        | -0.59011 |
| AC008115.3   | -0.59018 |
| LRRN3        | -0.59052 |
| U62317.3     | -0.59059 |
| RHOQ-AS1     | -0.59105 |
| CXCL11       | -0.59125 |
| RNU6-1209P   | -0.59148 |
| APOBEC3D     | -0.59212 |
| MYCL         | -0.59249 |
| PPIL6        | -0.59261 |
| SPN          | -0.59376 |
| APOE         | -0.59418 |
| ABCB1        | -0.59425 |
| EFCAB10      | -0.59485 |
| SLC25A21-AS1 | -0.59493 |
| MIR2355      | -0.59498 |
| CYTH4        | -0.59506 |
| MT1H         | -0.596   |
| IGSF6        | -0.59617 |
| AC078883.1   | -0.59625 |
| PLA2G7       | -0.59634 |
| FAM83F       | -0.59726 |
| AK7          | -0.59808 |
| AC019226.1   | -0.59825 |
| AC068790.2   | -0.59868 |
| WARS1        | -0.59872 |
| AC015982.1   | -0.59945 |
| PDIA2        | -0.59995 |
| GMFG         | -0.60052 |
| AC005838.2   | -0.60096 |
| AC020913.3   | -0.60097 |
| AP000866.6   | -0.60133 |
| DOCK8        | -0.60244 |
| APOL3        | -0.60256 |
| PSMB8-AS1    | -0.60358 |
| AC025580.1   | -0.60425 |
| PARVG        | -0.60496 |
| SNAI3        | -0.60533 |

|            |          |
|------------|----------|
| LINC00342  | -0.60549 |
| MIR1972-1  | -0.60581 |
| KCNK13     | -0.60634 |
| DLL3       | -0.60703 |
| PIK3R5     | -0.60736 |
| APOBEC3G   | -0.60743 |
| AC005070.3 | -0.60772 |
| DOK3       | -0.60784 |
| PTGES3P2   | -0.60788 |
| CTSG       | -0.6079  |
| ARHGEF6    | -0.6087  |
| KMO        | -0.60871 |
| SERPINE2   | -0.60903 |
| KRT15      | -0.61035 |
| SNORA11    | -0.61111 |
| OR2I1P     | -0.61149 |
| MIR4489    | -0.61261 |
| SNORA22B   | -0.61319 |
| RUNX3      | -0.61325 |
| DOCK10     | -0.61332 |
| RNU6-767P  | -0.6135  |
| RN7SL600P  | -0.61364 |
| AC145098.1 | -0.61372 |
| UCKL1-AS1  | -0.61398 |
| AKNA       | -0.61488 |
| SLAMF8     | -0.6152  |
| PABPC4-AS1 | -0.61641 |
| NEURL1     | -0.61678 |
| APOBEC3H   | -0.617   |
| PLA2G3     | -0.61729 |
| PNMA6A     | -0.61736 |
| DNAJC5B    | -0.61736 |
| RNU6-90P   | -0.61739 |
| RN7SL558P  | -0.61752 |
| AC104534.1 | -0.6176  |
| CCDC65     | -0.61786 |
| ITGAX      | -0.61801 |
| SCARNA20   | -0.6184  |
| ANKRD44    | -0.61864 |
| AC083798.1 | -0.61872 |
| AC087286.2 | -0.62239 |
| TREML1     | -0.62273 |
| GBP4       | -0.62278 |
| EVI2A      | -0.62286 |
| ARL4AP4    | -0.62304 |
| TLR8       | -0.62326 |
| TBX21      | -0.62352 |
| CIITA      | -0.62415 |
| RNA5SP118  | -0.62417 |

|            |          |
|------------|----------|
| GIMAP4     | -0.62524 |
| DNAI4      | -0.62634 |
| CALCA      | -0.62682 |
| OSBPL6     | -0.62686 |
| RNU6-118P  | -0.62701 |
| GPR183     | -0.62727 |
| CASP4LP    | -0.62749 |
| IGHG4      | -0.62829 |
| DPEP2      | -0.62836 |
| NLRC5      | -0.62859 |
| RRN3P2     | -0.62877 |
| RNU7-41P   | -0.6294  |
| KRT4       | -0.62957 |
| HSPA7      | -0.62997 |
| FGD3       | -0.63029 |
| RAB30      | -0.63162 |
| TTC21A     | -0.63211 |
| FAM107A    | -0.63213 |
| GAS6-AS1   | -0.6346  |
| IGHE       | -0.63476 |
| FGF18      | -0.63494 |
| AC010654.1 | -0.63505 |
| DNAH3      | -0.63698 |
| AC053527.1 | -0.63776 |
| JAML       | -0.63855 |
| SNORA26    | -0.63858 |
| CCDC160    | -0.63933 |
| IGSF10     | -0.63945 |
| AC110741.1 | -0.63989 |
| NCKAP5     | -0.64212 |
| SNORD70    | -0.64226 |
| PLEK       | -0.64279 |
| RN7SL473P  | -0.64292 |
| TP53INP1   | -0.64356 |
| CCDC39     | -0.64359 |
| AC098851.1 | -0.64468 |
| RNA5SP282  | -0.64514 |
| NFASC      | -0.64532 |
| VIL1       | -0.64564 |
| BNIP3P17   | -0.64627 |
| HAMP       | -0.64686 |
| SAMSN1     | -0.64826 |
| SPRR3      | -0.64879 |
| AC108134.3 | -0.64897 |
| TPPP3      | -0.64934 |
| GRIA1      | -0.64971 |
| ADAMTS8    | -0.65124 |
| ARHGAP30   | -0.6513  |
| ERFE       | -0.65178 |

|              |          |
|--------------|----------|
| CCDC89       | -0.65202 |
| CXCL10       | -0.65273 |
| TMC8         | -0.6537  |
| AL136296.1   | -0.65388 |
| AC015819.1   | -0.65488 |
| SPATA18      | -0.65494 |
| ASB2         | -0.65655 |
| BTNL9        | -0.65724 |
| MIR6124      | -0.65761 |
| AGAP2        | -0.65794 |
| GZMB         | -0.65815 |
| Z83843.1     | -0.65848 |
| AC025917.1   | -0.65851 |
| H2AC11       | -0.65887 |
| FYB1         | -0.65985 |
| AC069023.1   | -0.66044 |
| ADA2         | -0.66089 |
| LILRB4       | -0.66111 |
| GPR65        | -0.66116 |
| RNF183       | -0.6613  |
| AC080188.2   | -0.66138 |
| ARHGEF38-IT1 | -0.66149 |
| RN7SL3       | -0.66171 |
| FOXI3        | -0.66204 |
| HLA-DQB1-AS1 | -0.66374 |
| IRF1-AS1     | -0.66423 |
| P2RY12       | -0.66478 |
| PROC         | -0.66496 |
| AL121899.1   | -0.66538 |
| AL133371.2   | -0.66563 |
| FTX          | -0.6658  |
| HLA-DOA      | -0.66582 |
| AC133644.1   | -0.66601 |
| AC087273.2   | -0.6661  |
| ABCA6        | -0.66718 |
| CCT8P1       | -0.66736 |
| NCKAP1L      | -0.66773 |
| C5orf49      | -0.66774 |
| BMP5         | -0.66774 |
| AC099343.2   | -0.66809 |
| SAA2         | -0.6688  |
| SLA          | -0.66884 |
| RNU6-251P    | -0.6693  |
| AC083809.1   | -0.66971 |
| LINC02300    | -0.67043 |
| CRISP3       | -0.6736  |
| IL4I1        | -0.67396 |
| WAS          | -0.67398 |
| TASL         | -0.67409 |

|             |          |
|-------------|----------|
| CR1         | -0.67517 |
| CD72        | -0.67574 |
| CCDC88B     | -0.67602 |
| AC084871.1  | -0.67682 |
| RNU6-100P   | -0.67686 |
| APOM        | -0.67755 |
| ADH1B       | -0.67982 |
| PGM5        | -0.67989 |
| PDCD1       | -0.67997 |
| TRAV19      | -0.68051 |
| TNFSF13B    | -0.68073 |
| ACAP2-IT1   | -0.68078 |
| ABCA9       | -0.68118 |
| SYNE3       | -0.68159 |
| DNAH1       | -0.68217 |
| BIN2        | -0.68219 |
| ACKR1       | -0.6824  |
| INPP5D      | -0.68277 |
| SLC5A5      | -0.68427 |
| GFRA3       | -0.68535 |
| AL683807.1  | -0.68595 |
| GIMAP1      | -0.6869  |
| CCDC151     | -0.6869  |
| EIF4EP1     | -0.68737 |
| ARMC4       | -0.68788 |
| BMP6        | -0.68838 |
| JAK3        | -0.68869 |
| AC037198.1  | -0.68889 |
| RNY1P9      | -0.68905 |
| CD53        | -0.68956 |
| COL6A6      | -0.68992 |
| CFAP94      | -0.69002 |
| LRRC10B     | -0.69173 |
| CCL14       | -0.6921  |
| IDO1        | -0.69214 |
| CD52        | -0.69217 |
| RNU6-890P   | -0.69287 |
| KIF26B-AS1  | -0.69293 |
| CSF2RB      | -0.69311 |
| AC007684.2  | -0.69345 |
| LRRC43      | -0.69386 |
| RUBCNL      | -0.69397 |
| SNORD46     | -0.69424 |
| LILRB1      | -0.6946  |
| SDS         | -0.69502 |
| REC8        | -0.69631 |
| C2CD4B      | -0.6964  |
| RNU6ATAC24P | -0.69677 |
| H2AC13      | -0.69692 |

|            |          |
|------------|----------|
| KLRG1      | -0.6979  |
| RAB33A     | -0.69823 |
| ZNF460     | -0.69837 |
| ARHGAP25   | -0.69844 |
| DRC3       | -0.69866 |
| FAM78A     | -0.69897 |
| SNORA3B    | -0.69964 |
| AC002064.2 | -0.70035 |
| PLA1A      | -0.70053 |
| XCL2       | -0.70127 |
| IL12RB1    | -0.70141 |
| CD84       | -0.70175 |
| CXCR3      | -0.70298 |
| GAB3       | -0.70396 |
| DNASE2B    | -0.70419 |
| NKG7       | -0.70475 |
| ATP5MFP2   | -0.70576 |
| SIGLEC10   | -0.7066  |
| CDCA4P1    | -0.70677 |
| PITX2      | -0.70684 |
| PRDM1      | -0.70753 |
| SNRPEP10   | -0.70756 |
| SNX20      | -0.70877 |
| ADAM33     | -0.70891 |
| EBI3       | -0.71015 |
| TMEM156    | -0.71075 |
| AGBL2      | -0.71108 |
| AC090948.2 | -0.71143 |
| SAA2-SAA4  | -0.71153 |
| AC004836.1 | -0.71229 |
| AC063965.2 | -0.71286 |
| TTC6       | -0.7145  |
| CST1       | -0.71476 |
| HLA-DQA1   | -0.71552 |
| JAKMIP1    | -0.71571 |
| SNAP25     | -0.71598 |
| LAG3       | -0.71634 |
| RPL38P5    | -0.71752 |
| KBTBD8     | -0.71787 |
| CCL5       | -0.71796 |
| AL606469.1 | -0.71856 |
| MAK        | -0.71898 |
| ABI3BP     | -0.71942 |
| TCTEX1D4   | -0.71973 |
| C5         | -0.71978 |
| FOXP3      | -0.7205  |
| PLCG2      | -0.72175 |
| IFITM3P6   | -0.725   |
| TSPAN32    | -0.72736 |

|            |          |
|------------|----------|
| CD200R1    | -0.72813 |
| AL023653.1 | -0.72816 |
| REN        | -0.72851 |
| CPM        | -0.72913 |
| P2RY13     | -0.72958 |
| IP6K3      | -0.73011 |
| AC012181.2 | -0.73075 |
| MCOLN2     | -0.73361 |
| KLK12      | -0.73407 |
| CD244      | -0.7349  |
| IL2RB      | -0.73565 |
| SLA2       | -0.73695 |
| RNU6-548P  | -0.73903 |
| RNU7-18P   | -0.73964 |
| CATIP      | -0.73966 |
| BTK        | -0.74007 |
| AC073651.1 | -0.74013 |
| AC087392.1 | -0.74028 |
| CCDC146    | -0.7407  |
| RBP5       | -0.74085 |
| ECRG4      | -0.74088 |
| CCDC114    | -0.74089 |
| FGD2       | -0.74242 |
| FCGR2C     | -0.74246 |
| MIR5692A1  | -0.74418 |
| IGF2       | -0.74535 |
| DOCK2      | -0.74552 |
| DBH-AS1    | -0.74598 |
| AC090181.3 | -0.74606 |
| GIMAP7     | -0.7466  |
| NEFL       | -0.74738 |
| ZBTB20     | -0.7478  |
| CD1D       | -0.74854 |
| USP30-AS1  | -0.74861 |
| TTC25      | -0.74972 |
| SNORD11    | -0.74973 |
| LINC02446  | -0.75002 |
| C16orf54   | -0.75045 |
| ARHGAP15   | -0.75075 |
| RNU6-1189P | -0.75119 |
| AC087286.4 | -0.75187 |
| IGLV1-41   | -0.75241 |
| NAPSB      | -0.75299 |
| MIR421     | -0.75509 |
| RNU7-71P   | -0.75705 |
| LINC01871  | -0.75733 |
| KCNN3      | -0.75772 |
| RNU7-48P   | -0.75794 |
| AL158801.1 | -0.75919 |



|             |          |
|-------------|----------|
| CORO1A      | -0.76123 |
| PROM1       | -0.762   |
| AC020978.3  | -0.76212 |
| AL590764.1  | -0.76252 |
| CFAP57      | -0.76423 |
| IL2RG       | -0.76624 |
| IGHD3-10    | -0.76703 |
| PIFO        | -0.76758 |
| AGTR1       | -0.76815 |
| RPS27AP10   | -0.77103 |
| IGLV5-52    | -0.77116 |
| GZMH        | -0.77147 |
| NKX1-2      | -0.77176 |
| C7orf57     | -0.77265 |
| AL137247.1  | -0.77333 |
| GAL         | -0.77348 |
| CHIT1       | -0.77376 |
| ACBD3-AS1   | -0.7752  |
| CCR5        | -0.77538 |
| PSTPIP1     | -0.77543 |
| AC018755.4  | -0.77583 |
| AC004034.1  | -0.77662 |
| SYT13       | -0.77716 |
| SCIMP       | -0.77742 |
| FYB2        | -0.78077 |
| AOAH        | -0.78079 |
| ITGB7       | -0.781   |
| SIGLEC8     | -0.78247 |
| CLEC2D      | -0.78306 |
| HTRA4       | -0.78362 |
| SFRP5       | -0.78419 |
| RNU6-1016P  | -0.78456 |
| GAPT        | -0.78546 |
| SLCO4A1-AS1 | -0.78587 |
| SOX2        | -0.78712 |
| IL7R        | -0.78765 |
| ATP5MDP1    | -0.78779 |
| SPAG17      | -0.78826 |
| AL096712.1  | -0.78851 |
| GLYATL2     | -0.78987 |
| AC092569.1  | -0.79023 |
| CCR8        | -0.79108 |
| RNU6-247P   | -0.7921  |
| PAX9        | -0.79242 |
| HNRNPA1P21  | -0.79314 |
| IL10RA      | -0.79351 |
| CARMIL2     | -0.79397 |
| AC087752.3  | -0.79398 |
| PPP1R32     | -0.79578 |

|             |          |
|-------------|----------|
| AC012181.1  | -0.79721 |
| AC245014.3  | -0.79799 |
| CFAP53      | -0.80004 |
| IL22RA2     | -0.80014 |
| AC092535.1  | -0.80101 |
| CCL17       | -0.80106 |
| AC016831.4  | -0.80131 |
| STK32B      | -0.80158 |
| H2AC17      | -0.80216 |
| CCR2        | -0.80285 |
| AC090948.3  | -0.80294 |
| AL133342.1  | -0.80328 |
| SNORD116-24 | -0.80347 |
| RNU6ATAC39P | -0.80358 |
| CRISP2      | -0.80366 |
| DRAIC       | -0.80433 |
| NHLRC4      | -0.80454 |
| PRKCB       | -0.80542 |
| HMGN1P8     | -0.80599 |
| RNVU1-30    | -0.80657 |
| AC135068.5  | -0.80703 |
| GPR82       | -0.80705 |
| ADGRB1      | -0.80775 |
| BCL11B      | -0.80844 |
| RWDD4P1     | -0.80931 |
| BCL2        | -0.81041 |
| CCDC173     | -0.81052 |
| EVI2B       | -0.81064 |
| CFAP70      | -0.81207 |
| TRPM8       | -0.81274 |
| AL133445.2  | -0.81363 |
| RNU1-67P    | -0.81442 |
| AC109446.2  | -0.81451 |
| CD180       | -0.8147  |
| CLEC10A     | -0.81541 |
| BANK1       | -0.81549 |
| SMTNL1      | -0.81839 |
| TMEM100     | -0.81861 |
| RNU6-1005P  | -0.82112 |
| GAS2L2      | -0.82191 |
| IL24        | -0.8221  |
| TRAV13-1    | -0.82281 |
| AMBP        | -0.82373 |
| LGALS7B     | -0.82413 |
| RNU6-638P   | -0.82462 |
| SLC5A1      | -0.82537 |
| CHRNA9      | -0.82549 |
| RNA5SP217   | -0.8256  |
| RNU6-761P   | -0.82664 |

|            |          |
|------------|----------|
| NTRK2      | -0.82678 |
| EML4-AS1   | -0.82687 |
| RN7SL521P  | -0.827   |
| CRTAM      | -0.82867 |
| ANK2       | -0.82958 |
| MIR548V    | -0.82961 |
| SASH3      | -0.83003 |
| RPL13AP17  | -0.83109 |
| TENT5C     | -0.83194 |
| LCK        | -0.83199 |
| AC005261.5 | -0.83221 |
| RNY4P25    | -0.83247 |
| PIK3CG     | -0.83323 |
| KCNRG      | -0.83446 |
| FHAD1      | -0.83827 |
| ADAMTS7P3  | -0.83839 |
| RNU6-341P  | -0.83862 |
| PWAR5      | -0.83873 |
| SLC4A8     | -0.84301 |
| H2BC7      | -0.84304 |
| PRUNE2     | -0.84394 |
| AC007384.1 | -0.8443  |
| TRAV12-3   | -0.84454 |
| TFEC       | -0.84454 |
| CFAP45     | -0.84523 |
| TRGV10     | -0.84553 |
| IRF8       | -0.84793 |
| ITCH-IT1   | -0.84803 |
| CD8A       | -0.84882 |
| GHRL       | -0.84886 |
| EFHB       | -0.84903 |
| MMP2-AS1   | -0.84909 |
| AC005920.2 | -0.84925 |
| CD28       | -0.8497  |
| PTPN7      | -0.84978 |
| TRAV39     | -0.85077 |
| SNORA71C   | -0.85098 |
| CALHM6     | -0.85164 |
| CXCR4      | -0.85186 |
| TRBV5-6    | -0.85192 |
| RPL35AP2   | -0.85447 |
| LGALS2     | -0.85473 |
| SLC39A5    | -0.85564 |
| FFAR2      | -0.85578 |
| KLK13      | -0.85719 |
| TAGAP      | -0.85761 |
| MTATP8P1   | -0.85797 |
| HDC        | -0.85799 |
| IL21R      | -0.858   |

|            |          |
|------------|----------|
| TMED11P    | -0.8581  |
| FAM183A    | -0.85892 |
| PCED1B-AS1 | -0.86034 |
| LINC01480  | -0.8604  |
| AL353804.2 | -0.86117 |
| GBP5       | -0.86247 |
| SNRPGP4    | -0.86332 |
| SEC11C     | -0.86402 |
| SNORD89    | -0.86419 |
| LTB        | -0.86656 |
| ARHGAP9    | -0.86738 |
| C11orf21   | -0.86881 |
| FGL1       | -0.86977 |
| SPEF1      | -0.86992 |
| H2BC17     | -0.87037 |
| FGL2       | -0.87281 |
| IFNG       | -0.87352 |
| NELL2      | -0.8736  |
| H2AC7      | -0.87371 |
| LINC00216  | -0.87437 |
| CCDC78     | -0.87444 |
| TRAV29DV5  | -0.87451 |
| CD37       | -0.87508 |
| RCSD1      | -0.87535 |
| TRBV9      | -0.87704 |
| FGB        | -0.87824 |
| CCDC181    | -0.87863 |
| AC004585.1 | -0.88077 |
| TRBV7-6    | -0.88231 |
| CABCOCO1   | -0.88289 |
| RNU6-82P   | -0.88506 |
| TRAV21     | -0.88529 |
| CD1B       | -0.88547 |
| AC009994.1 | -0.88549 |
| GZMA       | -0.88596 |
| NCF1       | -0.88663 |
| CNGA3      | -0.88765 |
| CD8B       | -0.88844 |
| LILRA4     | -0.88931 |
| DNASE1L3   | -0.88986 |
| PCP4       | -0.89038 |
| SNORA80E   | -0.89207 |
| SP140      | -0.89235 |
| GPR171     | -0.89284 |
| FASLG      | -0.8933  |
| SELL       | -0.89332 |
| ARMC3      | -0.89366 |
| COL6A5     | -0.89371 |
| BPIFB2     | -0.89415 |

|            |          |
|------------|----------|
| AL732366.1 | -0.8959  |
| AC015911.7 | -0.89602 |
| VNN3       | -0.89669 |
| TRAV12-2   | -0.89689 |
| CD69       | -0.89698 |
| NCF1C      | -0.897   |
| NCF1B      | -0.89929 |
| SCGN       | -0.9012  |
| HLA-DOB    | -0.90309 |
| UBD        | -0.90433 |
| PTPRC      | -0.90466 |
| P2RX1      | -0.90591 |
| BNIP3P40   | -0.90757 |
| AL157871.2 | -0.90852 |
| RSPH1      | -0.9087  |
| TNFSF8     | -0.90996 |
| LINC02351  | -0.91048 |
| CHST9      | -0.91052 |
| POU2F2     | -0.91054 |
| AC004130.1 | -0.91056 |
| SPP2       | -0.91189 |
| SLC38A4    | -0.91221 |
| MIR5195    | -0.91258 |
| AC007906.2 | -0.91371 |
| SLC5A8     | -0.91405 |
| CD3G       | -0.91508 |
| RN7SL151P  | -0.9154  |
| CD247      | -0.91555 |
| CPLX2      | -0.91732 |
| CDC20B     | -0.91761 |
| RN7SL381P  | -0.9181  |
| C7         | -0.91846 |
| KRT5       | -0.92258 |
| TRBV11-2   | -0.92304 |
| CCDC170    | -0.9234  |
| TRAV1-2    | -0.92429 |
| TRBV6-5    | -0.92446 |
| RGS1       | -0.92608 |
| RNU1-88P   | -0.92637 |
| HSPE1P18   | -0.92681 |
| MALAT1     | -0.92937 |
| SLFN12L    | -0.93038 |
| LRP2       | -0.93128 |
| RNY4P7     | -0.93233 |
| TOMM20P2   | -0.9324  |
| ZC3H12D    | -0.933   |
| ABCA13     | -0.93419 |
| TRBJ2-1    | -0.93492 |
| RNVU1-15   | -0.93522 |

|             |          |
|-------------|----------|
| AL162578.1  | -0.93535 |
| AC004884.2  | -0.93629 |
| AC114402.1  | -0.93708 |
| AL022313.2  | -0.93866 |
| IGKV5-2     | -0.93965 |
| RNU4ATAC16P | -0.94019 |
| GFI1        | -0.94047 |
| IL16        | -0.94231 |
| LDLRAD1     | -0.94321 |
| AL732366.2  | -0.94339 |
| IKZF3       | -0.94345 |
| SPAG8       | -0.94402 |
| AC131971.1  | -0.94619 |
| AC015722.2  | -0.94752 |
| ITGAL       | -0.94766 |
| MPHOSPH6P1  | -0.94825 |
| TESPA1      | -0.94907 |
| NLRC3       | -0.94909 |
| AL121790.2  | -0.94933 |
| RNVU1-2     | -0.94954 |
| AC012645.3  | -0.95041 |
| GP1BA       | -0.95048 |
| TRAC        | -0.95171 |
| TRG-AS1     | -0.95177 |
| TRAV8-6     | -0.95222 |
| IKZF1       | -0.95248 |
| RASAL3      | -0.95274 |
| CCDC17      | -0.95295 |
| RHOH        | -0.9531  |
| CACNG6      | -0.95337 |
| RNU4ATAC12P | -0.95353 |
| UBASH3A     | -0.95468 |
| CXCR6       | -0.95479 |
| ZCCHC12     | -0.95503 |
| LRRIQ1      | -0.95603 |
| NEK5        | -0.95632 |
| GRAP2       | -0.95649 |
| LINC02541   | -0.95707 |
| MDH1B       | -0.95751 |
| HLA-DPA3    | -0.95806 |
| CFAP157     | -0.95868 |
| CLEC4E      | -0.95981 |
| CD2         | -0.96223 |
| RN7SL128P   | -0.96223 |
| ZNF474      | -0.96228 |
| CD96        | -0.9623  |
| TRBJ2-3     | -0.96259 |
| RNU6-759P   | -0.96302 |
| WDFY4       | -0.96475 |

|            |          |
|------------|----------|
| CDHR3      | -0.96541 |
| TRBC2      | -0.96761 |
| MACC1-AS1  | -0.96816 |
| CYTIP      | -0.96835 |
| TEKT2      | -0.96839 |
| AC122718.2 | -0.96917 |
| CFLAR-AS1  | -0.97034 |
| RAB39B     | -0.97046 |
| MIR553     | -0.97149 |
| CTNND2     | -0.97299 |
| POLRMTP1   | -0.9738  |
| MIR155HG   | -0.97515 |
| CD3D       | -0.97525 |
| STMN2      | -0.9769  |
| TRBV7-3    | -0.97824 |
| CCR4       | -0.98218 |
| ZMYND10    | -0.98309 |
| P2RY8      | -0.98379 |
| TRAV13-2   | -0.98481 |
| ICOS       | -0.98592 |
| RN7SL141P  | -0.9871  |
| CD6        | -0.99065 |
| TRAV8-4    | -0.99229 |
| RN7SL663P  | -0.99237 |
| PNMA3      | -0.99265 |
| TRAV41     | -0.99288 |
| RNU6-130P  | -0.9936  |
| JSRP1      | -0.99392 |
| RPL32P1    | -0.99398 |
| AC108471.1 | -0.99415 |
| MIR5692C2  | -0.99465 |
| AL645924.1 | -0.99466 |
| RN7SL116P  | -0.99517 |
| CPNE5      | -0.99801 |
| ATP6V0E1P1 | -0.99846 |
| CADM3      | -0.9989  |
| RNU4-24P   | -1.00044 |
| TRAV4      | -1.00164 |
| TIGIT      | -1.00251 |
| AL022067.1 | -1.00296 |
| C6         | -1.00355 |
| SNORA70G   | -1.00367 |
| AC005326.1 | -1.00499 |
| AL021068.1 | -1.00714 |
| AP001429.1 | -1.00772 |
| TCTEX1D1   | -1.00773 |
| DYDC2      | -1.00814 |
| TRBV29-1   | -1.01065 |
| AC034105.1 | -1.01212 |

|              |          |
|--------------|----------|
| SNORD38D     | -1.01248 |
| RNU7-45P     | -1.01291 |
| AL606517.2   | -1.01311 |
| APOA1        | -1.01344 |
| NWD1         | -1.0145  |
| PIM2         | -1.01462 |
| MT-TV        | -1.01535 |
| CD3E         | -1.01641 |
| CXCL9        | -1.01793 |
| NAALADL2-AS2 | -1.01832 |
| IGHV1OR15-2  | -1.02036 |
| PPP1R16B     | -1.02099 |
| TRBV6-1      | -1.02192 |
| IGLC7        | -1.02448 |
| MIR7848      | -1.02496 |
| DERL3        | -1.02521 |
| KLRB1        | -1.02582 |
| AC141557.1   | -1.02618 |
| SIRPG        | -1.02628 |
| DLEC1        | -1.02744 |
| TRBV7-9      | -1.02772 |
| MS4A8        | -1.02868 |
| RN7SKP80     | -1.03057 |
| CLCA2        | -1.03157 |
| TBC1D10C     | -1.03193 |
| MAP4K1       | -1.03212 |
| MIR4420      | -1.03213 |
| RNU7-79P     | -1.03235 |
| IL18RAP      | -1.03319 |
| MIR4802      | -1.03344 |
| ICAM3        | -1.03393 |
| IGHV3-65     | -1.03398 |
| PARP15       | -1.03459 |
| AC007684.1   | -1.03498 |
| TRAV9-2      | -1.03533 |
| NOTUM        | -1.03608 |
| BAALC        | -1.03637 |
| ACAP1        | -1.03834 |
| PATL2        | -1.03894 |
| TRAV16       | -1.03919 |
| RN7SL674P    | -1.03934 |
| AC068587.2   | -1.04116 |
| LINC01215    | -1.04239 |
| SPAG6        | -1.04261 |
| LRRC46       | -1.04343 |
| RNU6-795P    | -1.04449 |
| SAXO2        | -1.04456 |
| EOMES        | -1.04492 |
| LTA          | -1.04594 |



|              |          |
|--------------|----------|
| TRAV17       | -1.04598 |
| PACRG        | -1.04731 |
| STMND1       | -1.04747 |
| NOS2         | -1.04951 |
| RN7SL665P    | -1.05003 |
| TIMM9P2      | -1.05132 |
| IGLV2-23     | -1.05251 |
| SIT1         | -1.05453 |
| ANXA13       | -1.05554 |
| CFAP91       | -1.05728 |
| DNAI3        | -1.05758 |
| SNORD71      | -1.05805 |
| H2AC20       | -1.06065 |
| TRBV19       | -1.06089 |
| AC011939.2   | -1.06145 |
| RN7SL564P    | -1.0618  |
| IGKV3OR2-268 | -1.06185 |
| TRBV3-1      | -1.0619  |
| ROPN1L       | -1.06199 |
| RNU6-608P    | -1.0621  |
| TRBV12-4     | -1.06226 |
| GIMAP5       | -1.06245 |
| IGLV3-9      | -1.06425 |
| RN7SL396P    | -1.06469 |
| MIR1205      | -1.06525 |
| TRBV28       | -1.06532 |
| TRBV18       | -1.06671 |
| DYNLRB2      | -1.06691 |
| TRAV3        | -1.06745 |
| ENKUR        | -1.0677  |
| CDK5R2       | -1.06843 |
| IGKV2D-40    | -1.06843 |
| RNU7-181P    | -1.07011 |
| H2BC6        | -1.07061 |
| SNORD67      | -1.07116 |
| SNORA5A      | -1.07301 |
| CD5          | -1.07307 |
| TRBJ2-2P     | -1.07336 |
| TRBJ2-2      | -1.07396 |
| IGKV2D-24    | -1.07537 |
| CNGA4        | -1.07583 |
| SLC13A2      | -1.07647 |
| THEMIS       | -1.07728 |
| P2RX5        | -1.07935 |
| SEPTIN1      | -1.08011 |
| IGHV3-79     | -1.08275 |
| MIR3142HG    | -1.0855  |
| AC007878.1   | -1.08643 |
| SNORD94      | -1.08955 |

|            |          |
|------------|----------|
| CYP2F1     | -1.09161 |
| CEL        | -1.09323 |
| TLR10      | -1.09365 |
| TRAV8-2    | -1.09532 |
| AC096741.1 | -1.09704 |
| PTGDS      | -1.09782 |
| BCL2L1-AS1 | -1.09835 |
| TTLL10     | -1.09849 |
| NKD1       | -1.09933 |
| KLHL6      | -1.09955 |
| RN7SL838P  | -1.09964 |
| FTH1P22    | -1.10004 |
| TAF5LP1    | -1.10279 |
| EFCAB1     | -1.10296 |
| RNU6-1176P | -1.10372 |
| TRAV14DV4  | -1.10414 |
| RNU6-107P  | -1.10426 |
| SLC38A3    | -1.10435 |
| DRC1       | -1.10447 |
| LINC00996  | -1.10471 |
| TRAJ31     | -1.10479 |
| C1orf194   | -1.10503 |
| H2BC13     | -1.10613 |
| IGHV3-22   | -1.1103  |
| RASGRP2    | -1.11077 |
| VWA3B      | -1.1119  |
| C11orf16   | -1.11208 |
| MEI1       | -1.11213 |
| CUZD1      | -1.11275 |
| RNU7-80P   | -1.11398 |
| SNORD9     | -1.11417 |
| SLAMF7     | -1.11438 |
| SCG3       | -1.1157  |
| MTMR7      | -1.11655 |
| AC114760.2 | -1.11955 |
| SYT4       | -1.12014 |
| SNORA74B   | -1.12041 |
| SNTN       | -1.1212  |
| HPX        | -1.12436 |
| IGHV4-34   | -1.12576 |
| OMG        | -1.12754 |
| TRAF3IP3   | -1.12765 |
| AC007991.2 | -1.12832 |
| SH2D1A     | -1.12885 |
| LILRA2     | -1.12898 |
| TRBJ2-7    | -1.12929 |
| CFAP43     | -1.13113 |
| AF178030.1 | -1.13137 |
| DDC        | -1.13381 |

|             |          |
|-------------|----------|
| RNVU1-27    | -1.13496 |
| SCARNA8     | -1.13674 |
| LY9         | -1.13858 |
| CD48        | -1.13962 |
| TRBC1       | -1.14131 |
| AC004386.6  | -1.1416  |
| TFAP2D      | -1.14188 |
| F2          | -1.14266 |
| CAPSL       | -1.14592 |
| DCDC2B      | -1.14879 |
| MUC6        | -1.14941 |
| LINC00426   | -1.15028 |
| AC087286.1  | -1.15098 |
| TRBV20-1    | -1.15211 |
| P2RY10      | -1.15215 |
| IGHV3-38    | -1.15661 |
| IGHD        | -1.15879 |
| TRBV2       | -1.1604  |
| TRBV5-4     | -1.16063 |
| IGKV3D-15   | -1.16147 |
| IGLV7-46    | -1.16226 |
| TRAV12-1    | -1.16276 |
| TRBV6-6     | -1.16465 |
| PYHIN1      | -1.16575 |
| STOML3      | -1.16683 |
| AC004687.1  | -1.1677  |
| IGLV3-12    | -1.16809 |
| SNORA28     | -1.16827 |
| RSPH4A      | -1.16949 |
| IGHV5-78    | -1.17042 |
| RN7SL752P   | -1.17085 |
| CLECL1      | -1.17097 |
| AC015911.3  | -1.17203 |
| ZBP1        | -1.17328 |
| ANKRD44-AS1 | -1.17382 |
| CTLA4       | -1.17388 |
| IGHG2       | -1.17476 |
| TRAV8-3     | -1.17546 |
| IGHD6-19    | -1.17549 |
| RN7SL767P   | -1.17693 |
| IGHA2       | -1.1771  |
| TRBV5-1     | -1.17737 |
| SNORA1B     | -1.17761 |
| SAA4        | -1.18235 |
| BTBD9-AS1   | -1.18281 |
| CXCR2P1     | -1.18442 |
| RERGL       | -1.18593 |
| IGLV3-13    | -1.18776 |
| ANKRD36C    | -1.18841 |

|              |          |
|--------------|----------|
| ADGRG5       | -1.1885  |
| IGHV1-69D    | -1.19142 |
| RNU6-942P    | -1.19142 |
| FAM166B      | -1.19525 |
| ITK          | -1.19548 |
| IGHV3-43     | -1.19628 |
| IGHG3        | -1.19655 |
| IGHV1OR21-1  | -1.19723 |
| TRAJ3        | -1.19758 |
| SLAMF1       | -1.1983  |
| IGHD2-15     | -1.19928 |
| APOH         | -1.20149 |
| IGHV3-60     | -1.20237 |
| MORN5        | -1.20254 |
| AC245128.3   | -1.20321 |
| ZAP70        | -1.20348 |
| IGLV3-21     | -1.20382 |
| IGHV1-67     | -1.20542 |
| IGHV3OR16-15 | -1.20613 |
| CD300LG      | -1.2063  |
| DNAI1        | -1.20685 |
| GZMK         | -1.20734 |
| CFAP73       | -1.20766 |
| RNU6-122P    | -1.20941 |
| RNA5SP111    | -1.21055 |
| C9orf24      | -1.21113 |
| CD40LG       | -1.21195 |
| IGHV3OR16-8  | -1.21699 |
| IGLC6        | -1.21719 |
| AL157871.3   | -1.21893 |
| MIR644A      | -1.22038 |
| TUBA4B       | -1.22282 |
| CCDC154      | -1.22292 |
| C9orf135     | -1.22507 |
| RET          | -1.22732 |
| IGLC2        | -1.22748 |
| CFAP65       | -1.22892 |
| AL139120.1   | -1.22905 |
| CFAP77       | -1.22954 |
| GPR15        | -1.23068 |
| IGLV5-37     | -1.23145 |
| SPRR2A       | -1.23296 |
| SNORA53      | -1.23684 |
| IGHV3-66     | -1.23799 |
| SLAMF6       | -1.23838 |
| CREB3L2-AS1  | -1.23988 |
| RNU6-920P    | -1.24016 |
| PSMD10P1     | -1.24036 |
| RNU6-522P    | -1.24263 |

|              |          |
|--------------|----------|
| RNVU1-31     | -1.24326 |
| CFAP100      | -1.24416 |
| DNAAF1       | -1.24496 |
| IGHV1-18     | -1.2454  |
| C1orf189     | -1.24568 |
| CD27         | -1.24576 |
| GVINP1       | -1.24798 |
| IGHV1-46     | -1.24855 |
| MIR1245A     | -1.24895 |
| IGHV1-58     | -1.24996 |
| AKAP14       | -1.25014 |
| TRAT1        | -1.25023 |
| AC234772.1   | -1.25023 |
| FCMR         | -1.25094 |
| RN7SKP227    | -1.2523  |
| IGKV1OR10-1  | -1.25285 |
| RNU6-2       | -1.25289 |
| AC243960.1   | -1.25316 |
| IGHV3OR15-7  | -1.25383 |
| CFAP52       | -1.25651 |
| IGHA1        | -1.25772 |
| SNORA2C      | -1.25787 |
| IGLV2-28     | -1.25848 |
| ECT2L        | -1.26122 |
| IGHJ2        | -1.26254 |
| VWA3A        | -1.26288 |
| GPR18        | -1.26307 |
| CCR7         | -1.26384 |
| RPL12P20     | -1.26387 |
| IGHV3OR16-12 | -1.26508 |
| IGHV3-6      | -1.26628 |
| AL133304.2   | -1.2667  |
| IGKV2OR22-4  | -1.26706 |
| IGHV7-81     | -1.26732 |
| IGHV3-49     | -1.26814 |
| RNU7-124P    | -1.27269 |
| IGLV1-50     | -1.27306 |
| IGLC3        | -1.27384 |
| AC022022.2   | -1.27487 |
| IGKV2-29     | -1.27558 |
| SPRR1A       | -1.27641 |
| GPR174       | -1.27655 |
| RN7SKP9      | -1.27692 |
| RNU7-70P     | -1.27742 |
| PNOC         | -1.2776  |
| WDR38        | -1.27841 |
| IGKV1D-43    | -1.27913 |
| H2BC9        | -1.28233 |
| HOATZ        | -1.28349 |

|             |          |
|-------------|----------|
| IGKV3D-11   | -1.28381 |
| RNU6-681P   | -1.28531 |
| TRBV4-2     | -1.28593 |
| IGLJ2       | -1.28798 |
| TTC29       | -1.28898 |
| C1orf87     | -1.28901 |
| AC100826.1  | -1.28947 |
| MIAT        | -1.29078 |
| APOBEC4     | -1.29195 |
| IGHV3-62    | -1.29437 |
| LILRP1      | -1.29512 |
| SNORA20     | -1.30147 |
| LRRC71      | -1.30177 |
| IGKV3-7     | -1.30243 |
| CDHR4       | -1.30384 |
| IGHV3-47    | -1.30448 |
| IGLV2-33    | -1.30589 |
| DNAAF6      | -1.3064  |
| TRBV10-3    | -1.307   |
| IGHV3-63    | -1.30747 |
| MZB1        | -1.30855 |
| KIF19       | -1.30914 |
| IGHV1-45    | -1.30921 |
| RNVU1-7     | -1.31285 |
| IGHV3OR16-9 | -1.31369 |
| IGHV1-17    | -1.3146  |
| IGLV4-69    | -1.31759 |
| IGHV1-69    | -1.31802 |
| LRRC18      | -1.3202  |
| LINC01857   | -1.32051 |
| IGHJ3       | -1.32103 |
| AC091925.2  | -1.32108 |
| IGKV1-17    | -1.32109 |
| FCRL2       | -1.32132 |
| OBP2A       | -1.32154 |
| LINC01765   | -1.32203 |
| IGLV2-5     | -1.32269 |
| IGHV7-27    | -1.32477 |
| TRBV4-1     | -1.32511 |
| C20orf85    | -1.32512 |
| SPIB        | -1.32563 |
| C6orf118    | -1.32721 |
| IGLV3-25    | -1.32734 |
| IGHGP       | -1.32835 |
| IGHV3-53    | -1.32913 |
| WDR49       | -1.32972 |
| SNORD56B    | -1.33036 |
| IGLV3-10    | -1.33055 |
| C22orf15    | -1.33208 |

|             |          |
|-------------|----------|
| IGKV1D-17   | -1.33295 |
| TEKT1       | -1.33399 |
| IGKV3D-20   | -1.33458 |
| LTF         | -1.33712 |
| IGKV3-15    | -1.33868 |
| RNU6-998P   | -1.33959 |
| IGHV3-41    | -1.33997 |
| IGHV3-35    | -1.3435  |
| IGHV3-73    | -1.34483 |
| CIBAR2      | -1.34743 |
| AC103591.3  | -1.34983 |
| SNORA14B    | -1.35126 |
| IGKV1-16    | -1.35156 |
| IGHD6-6     | -1.35319 |
| IGLV2-34    | -1.35473 |
| ATP12A      | -1.35492 |
| MIR624      | -1.35539 |
| IGHV1OR15-9 | -1.35638 |
| IGLV1-47    | -1.3575  |
| H3C13       | -1.36004 |
| SRGAP3-AS2  | -1.36016 |
| IGKV1-8     | -1.36089 |
| POU2AF1     | -1.36264 |
| CHRD12      | -1.3627  |
| IGKV1D-13   | -1.36563 |
| IGLV4-3     | -1.36595 |
| NCR3        | -1.36892 |
| IGKV2D-28   | -1.36963 |
| SCARNA7     | -1.37045 |
| IGLV2-11    | -1.37093 |
| AC103563.3  | -1.37107 |
| IGHD3-9     | -1.37485 |
| AC022973.4  | -1.37658 |
| IGKV1-27    | -1.37765 |
| IGHV3-37    | -1.37773 |
| AL049830.4  | -1.38016 |
| SCARNA22    | -1.38063 |
| IGKV2-30    | -1.38365 |
| IGHV4-59    | -1.38491 |
| PI15        | -1.38503 |
| RPS20P15    | -1.38875 |
| RNU11       | -1.38918 |
| DNAH9       | -1.39013 |
| ADAMDEC1    | -1.39212 |
| IGHV3-48    | -1.39315 |
| ITIH2       | -1.39332 |
| C11orf97    | -1.39333 |
| IGLV5-48    | -1.39369 |
| IGKV1OR2-3  | -1.39448 |

|              |          |
|--------------|----------|
| IGHV3-52     | -1.39475 |
| UMODL1       | -1.39479 |
| IGHV3OR16-13 | -1.39815 |
| IGHV3-75     | -1.40013 |
| DTHD1        | -1.40026 |
| RNU5A-8P     | -1.4005  |
| BTLA         | -1.4017  |
| NUGGC        | -1.40294 |
| IGHV3OR16-10 | -1.40459 |
| LINC00582    | -1.40463 |
| DNAI2        | -1.40485 |
| IGHVIII-67-2 | -1.40577 |
| IGLV7-43     | -1.4059  |
| SNORA63C     | -1.40767 |
| IGHV3OR16-17 | -1.41019 |
| AC010359.1   | -1.41022 |
| IGHV4-61     | -1.41117 |
| RNU6-126P    | -1.41268 |
| IGHV3-30     | -1.41491 |
| IGLV6-57     | -1.4163  |
| AC134879.2   | -1.41686 |
| DEFB4A       | -1.41781 |
| H3C12        | -1.4179  |
| LINC00861    | -1.41904 |
| FAM216B      | -1.41946 |
| IGKV3-20     | -1.41959 |
| TRAJ17       | -1.41985 |
| CD22         | -1.42023 |
| RNU5F-1      | -1.42181 |
| SNORD15B     | -1.4223  |
| STAP1        | -1.42365 |
| IGHV3-76     | -1.42475 |
| IGKV1-5      | -1.42507 |
| RNU1-11P     | -1.42609 |
| IGHV4-28     | -1.42962 |
| IGHV2-70     | -1.43035 |
| IGHV4-31     | -1.43095 |
| IGHV5-51     | -1.43127 |
| IGKV1D-8     | -1.43177 |
| IGLL5        | -1.43181 |
| TAC4         | -1.43197 |
| IGKC         | -1.4335  |
| PAH          | -1.43377 |
| IGHV1-12     | -1.43418 |
| IGHG1        | -1.43452 |
| TMEM190      | -1.43544 |
| ZBBX         | -1.43685 |
| AC245517.5   | -1.43748 |
| IGKV1D-33    | -1.44073 |



|              |          |
|--------------|----------|
| TRAJ6        | -1.44099 |
| IGFBP1       | -1.44393 |
| TRAJ18       | -1.44402 |
| RNU6-1045P   | -1.44482 |
| IGKV1-9      | -1.44514 |
| IGLV1-44     | -1.44543 |
| SCARNA21     | -1.4469  |
| IGHV3-72     | -1.44701 |
| IGKV7-3      | -1.45019 |
| IGLV1-40     | -1.45061 |
| AC135068.1   | -1.452   |
| UGT2B4       | -1.45256 |
| IGLV1-51     | -1.45382 |
| IGHV3-64     | -1.45563 |
| IGLV2-8      | -1.45771 |
| LAX1         | -1.4603  |
| IGHV3-33     | -1.46103 |
| IGHV4-55     | -1.46313 |
| MIR8071-1    | -1.46353 |
| IGKV1OR2-108 | -1.46692 |
| RNU4-51P     | -1.46732 |
| AC090571.1   | -1.46876 |
| IGKV2-18     | -1.46994 |
| AL357093.2   | -1.47002 |
| VPREB3       | -1.47086 |
| RNU6-1283P   | -1.47167 |
| IGKV2D-29    | -1.47321 |
| SNORA46      | -1.47381 |
| MIR3140      | -1.47862 |
| TRAJ1        | -1.48111 |
| IGHV7-56     | -1.48318 |
| TCL1A        | -1.48433 |
| TRAJ2        | -1.4846  |
| AC025423.5   | -1.48498 |
| FCRL5        | -1.48904 |
| ERICH3       | -1.48905 |
| MIR5690      | -1.49073 |
| RN7SL648P    | -1.49243 |
| IGHV3-19     | -1.49339 |
| TSPAN19      | -1.49376 |
| IGKV2-28     | -1.49849 |
| IGHV1-3      | -1.49883 |
| LINC02362    | -1.49919 |
| IGKV3-11     | -1.50038 |
| IGHV1OR16-1  | -1.50064 |
| IGKV1D-39    | -1.50141 |
| AC037487.2   | -1.50216 |
| IRF4         | -1.50233 |
| MIR34C       | -1.50412 |

|             |          |
|-------------|----------|
| AC130895.1  | -1.50516 |
| PVALB       | -1.50541 |
| ASCL1       | -1.50709 |
| JCHAIN      | -1.50744 |
| IGHV3-21    | -1.50963 |
| TRAJ5       | -1.51112 |
| AC009032.1  | -1.51121 |
| FGF19       | -1.51204 |
| IGLV2-14    | -1.5175  |
| IGLJ1       | -1.51857 |
| SNORA7B     | -1.51953 |
| SCARNA9     | -1.52379 |
| TRAJ10      | -1.52406 |
| H2AC16      | -1.52424 |
| SNORA40B    | -1.52942 |
| SNRPGP18    | -1.53172 |
| IGHV3-74    | -1.53191 |
| IGKV1OR22-5 | -1.53339 |
| AL033519.1  | -1.53459 |
| IGHV3-15    | -1.53565 |
| ANKRD44-IT1 | -1.53586 |
| CLC         | -1.53817 |
| IGKV1-6     | -1.53878 |
| RNY4        | -1.54039 |
| IGHV1-2     | -1.54049 |
| CD79B       | -1.54203 |
| ASGR2       | -1.54255 |
| DTNB-AS1    | -1.54614 |
| IGKV2OR2-1  | -1.54668 |
| IGHD3-22    | -1.54857 |
| RNU6ATAC    | -1.5494  |
| IGHV3-25    | -1.55808 |
| IGLV3-1     | -1.55813 |
| SNORA63D    | -1.56084 |
| VTRNA1-1    | -1.56198 |
| IGKV1-39    | -1.56325 |
| IGHV3-42    | -1.56582 |
| TNFRSF17    | -1.56603 |
| IGHD4-17    | -1.56678 |
| IGKV2OR22-3 | -1.56749 |
| AGT         | -1.57199 |
| COPDA1      | -1.57459 |
| IGHV3-71    | -1.57552 |
| RN7SL329P   | -1.57767 |
| IGHV3-23    | -1.57881 |
| IGKV6D-21   | -1.58035 |
| IGHV3-7     | -1.58046 |
| IGHV3-20    | -1.58357 |
| SNORA74A    | -1.58481 |

|             |          |
|-------------|----------|
| SMYD3-AS1   | -1.59021 |
| AC142381.1  | -1.59311 |
| RN7SL2      | -1.59476 |
| IGHV4-39    | -1.59774 |
| RNU4ATAC    | -1.59876 |
| IGHJ2P      | -1.60061 |
| IGHV2-26    | -1.60197 |
| SCARNA18    | -1.60201 |
| TMEM14EP    | -1.60302 |
| ANKRD36BP2  | -1.60403 |
| TRAJ39      | -1.60447 |
| IGKJ5       | -1.60488 |
| IGHD4-23    | -1.60547 |
| CYP17A1     | -1.60829 |
| PLA2G2D     | -1.6098  |
| IGLV3-19    | -1.61322 |
| IGHV3-11    | -1.61549 |
| LINC00926   | -1.61778 |
| AL136320.1  | -1.6195  |
| RNU4-1      | -1.62565 |
| IGHV3OR16-6 | -1.63199 |
| IGKV3D-7    | -1.63344 |
| IGHD6-25    | -1.63485 |
| AKR1C4      | -1.63572 |
| IGLV2-18    | -1.63779 |
| LINC01419   | -1.64047 |
| INSM1       | -1.64462 |
| IGHJ1       | -1.64612 |
| IGKV2-24    | -1.65335 |
| SNORD8      | -1.65439 |
| IGHD6-13    | -1.65753 |
| IGKV4-1     | -1.65846 |
| IGLJ3       | -1.65974 |
| TRAJ38      | -1.66141 |
| CXCL13      | -1.66147 |
| IGKV1OR2-11 | -1.66284 |
| MIR8071-2   | -1.66357 |
| IGKV2-26    | -1.66825 |
| CR2         | -1.67309 |
| KRT13       | -1.67997 |
| TNFRSF13C   | -1.68622 |
| RNU2-59P    | -1.69125 |
| IGLV4-60    | -1.69152 |
| IGHV1-24    | -1.69716 |
| SCARNA12    | -1.70318 |
| IGLV3-27    | -1.70409 |
| H2BC14      | -1.7044  |
| IGKV1OR22-1 | -1.70972 |
| RNA5SP202   | -1.71358 |

|             |          |
|-------------|----------|
| RNU4-2      | -1.7164  |
| AL157402.2  | -1.72068 |
| IGHJ3P      | -1.72071 |
| CD79A       | -1.72085 |
| RN7SKP203   | -1.72189 |
| FAM30A      | -1.72345 |
| H4C5        | -1.72791 |
| IGKV1OR2-6  | -1.73093 |
| IGHV4-4     | -1.73604 |
| SNORA80B    | -1.73929 |
| TRAJ12      | -1.74117 |
| IGHV2-5     | -1.74161 |
| SCARNA13    | -1.74961 |
| H3C1        | -1.75036 |
| IGKV1-33    | -1.75523 |
| PCSK1       | -1.75564 |
| H1-4        | -1.75786 |
| IGHV6-1     | -1.75919 |
| CCL19       | -1.75958 |
| AC103563.1  | -1.76172 |
| SNORA74D    | -1.76433 |
| TRAJ13      | -1.76946 |
| IGHD2-2     | -1.772   |
| IGKV1-12    | -1.78118 |
| IGHD4-4     | -1.78165 |
| SCARNA1     | -1.78395 |
| A2ML1       | -1.78901 |
| IGKV1-13    | -1.80106 |
| TRAJ8       | -1.80129 |
| IGHD1-1     | -1.80263 |
| PAX5        | -1.80368 |
| IGLV8-61    | -1.80478 |
| SNORA38B    | -1.80698 |
| FCRL3       | -1.80806 |
| MIR3609     | -1.80971 |
| IGHV1OR16-3 | -1.81311 |
| SCARNA3     | -1.81935 |
| IGLV5-45    | -1.82416 |
| NSG2        | -1.83017 |
| TRAJ37      | -1.83182 |
| H3C11       | -1.83259 |
| SCN3A       | -1.83308 |
| RMRP        | -1.83651 |
| RNU7-84P    | -1.83837 |
| SNORA47     | -1.84022 |
| SNORA37     | -1.84373 |
| TRAJ16      | -1.84443 |
| RNU7-4P     | -1.84952 |
| RNU2-23P    | -1.85143 |

|              |          |
|--------------|----------|
| RN7SL507P    | -1.85622 |
| SCGB1A1      | -1.85633 |
| SCARNA10     | -1.86049 |
| APOA2        | -1.86107 |
| H2AC12       | -1.86391 |
| AC022973.1   | -1.86708 |
| TMEM229A     | -1.87259 |
| FCRLA        | -1.87959 |
| SNORA49      | -1.88447 |
| IGLV10-54    | -1.8863  |
| IGHV3-13     | -1.88743 |
| RNVU1-2A     | -1.8928  |
| TIMM9P1      | -1.91892 |
| CD19         | -1.91949 |
| IGKV6-21     | -1.92875 |
| LBP          | -1.92944 |
| CELF3        | -1.93698 |
| SNORA73B     | -1.94363 |
| PCK1         | -1.94573 |
| SNORA38      | -1.9482  |
| MIR4538      | -1.95328 |
| SNORA14A     | -1.96007 |
| FCER2        | -1.97103 |
| IGHD3-16     | -1.97511 |
| H2AC14       | -1.97675 |
| MIR4539      | -1.98294 |
| IGKV1D-12    | -1.98454 |
| TRAJ21       | -1.99608 |
| SNORA23      | -1.99933 |
| MIR4537      | -2.00197 |
| LINC01781    | -2.009   |
| RNY1         | -2.01912 |
| BLK          | -2.02103 |
| MIR5739      | -2.02834 |
| IGLV3-16     | -2.02852 |
| SNORA71A     | -2.037   |
| SNORA54      | -2.03955 |
| H4C2         | -2.04238 |
| RNU5A-1      | -2.04283 |
| IGHD2-21     | -2.04894 |
| IGLV3-6      | -2.05135 |
| RN7SKP71     | -2.0532  |
| SNORA22      | -2.06114 |
| RN7SKP255    | -2.06966 |
| H2AC4        | -2.07856 |
| IGLV1-36     | -2.08964 |
| AP000763.2   | -2.09197 |
| MIR4480      | -2.10362 |
| IGHV3OR16-11 | -2.10471 |

|            |          |
|------------|----------|
| RNU5B-1    | -2.11417 |
| IGHM       | -2.11623 |
| IGLVI-70   | -2.13673 |
| IGHD3-3    | -2.14397 |
| IGHV2-70D  | -2.14455 |
| TRAJ14     | -2.1559  |
| IGKV2D-30  | -2.15803 |
| RN7SL546P  | -2.16742 |
| FCRL1      | -2.16827 |
| GP2        | -2.17207 |
| AL391314.1 | -2.17701 |
| AL032819.2 | -2.18405 |
| H4C3       | -2.19563 |
| H2AC21     | -2.19605 |
| FDCSP      | -2.20049 |
| SCARNA6    | -2.20191 |
| SNORA80D   | -2.23568 |
| 7SK        | -2.24163 |
| RNY3       | -2.24738 |
| H4C4       | -2.25232 |
| TF         | -2.25293 |
| SNORA71D   | -2.25533 |
| SCARNA5    | -2.26062 |
| RNU5E-1    | -2.30351 |
| TTR        | -2.30384 |
| H1-3       | -2.30704 |
| MS4A1      | -2.32415 |
| SNORA84    | -2.34665 |
| IGKV1D-16  | -2.3485  |
| CALML3     | -2.34987 |
| SPRR2E     | -2.35576 |
| SNORA79B   | -2.37683 |
| SNORA12    | -2.40609 |
| H3C7       | -2.45617 |
| RNU5D-1    | -2.47109 |
| SNORA80A   | -2.4732  |
| OLFM4      | -2.49383 |
| H1-5       | -2.49467 |
| WNT16      | -2.49735 |
| DEFA8P     | -2.53499 |
| CEACAM7    | -2.55247 |
| H4C1       | -2.56295 |
| RNA5-8SN1  | -2.5711  |
| IGHD1-26   | -2.62426 |
| SNORA22C   | -2.65106 |
| SNORD17    | -2.71863 |
| ALB        | -2.72694 |
| SST        | -2.84613 |
| H4C13      | -2.85144 |

|            |          |
|------------|----------|
| IGKV6D-41  | -2.8825  |
| AL121584.1 | -3.00972 |
| H2BC3      | -3.04524 |
| TAC1       | -3.0936  |
| H2BC10     | -3.1528  |
| SCG2       | -3.16376 |
| AL355075.4 | -3.17743 |
| IGLV9-49   | -3.21637 |
| VTN        | -3.27353 |
| VGLL2      | -3.30562 |
| AC026333.1 | -3.71732 |
| RN7SL434P  | -3.84358 |
| DEFA9P     | -4.05329 |
| GC         | -4.1742  |
| H1-1       | -4.17922 |
| H4C6       | -4.3171  |
| KIR2DL1    | -4.46937 |
| AC093001.1 | -4.71482 |
| DKK4       | -4.95641 |
| CALB1      | -4.9594  |
| AFP        | -5.21308 |
| NPY        | -5.70133 |
| DEFA5      | -8.16463 |

Table S7. Immune cell bubbles of different IRGPI subgroups in multiplatform.

| immune                                         | cor      | pvalue   |
|------------------------------------------------|----------|----------|
| B cell_TIMER                                   | -0.55147 | 2.31E-41 |
| T cell CD4+_TIMER                              | -0.37626 | 2.31E-18 |
| T cell CD8+_TIMER                              | -0.19221 | 1.42E-05 |
| Neutrophil_TIMER                               | -0.21329 | 1.38E-06 |
| Myeloid dendritic cell_TIMER                   | -0.26619 | 1.32E-09 |
| B cell naive_CIBERSORT                         | -0.09194 | 0.039289 |
| B cell memory_CIBERSORT                        | -0.37676 | 2.07E-18 |
| B cell plasma_CIBERSORT                        | -0.15689 | 0.000413 |
| T cell CD8+_CIBERSORT                          | -0.18148 | 4.24E-05 |
| T cell CD4+ memory resting_CIBERSORT           | -0.16941 | 0.000135 |
| T cell CD4+ memory activated_CIBERSORT         | -0.11327 | 0.011015 |
| T cell follicular helper_CIBERSORT             | -0.13623 | 0.002199 |
| T cell regulatory (Tregs)_CIBERSORT            | -0.15135 | 0.00066  |
| T cell gamma delta_CIBERSORT                   | -0.11461 | 0.010097 |
| NK cell resting_CIBERSORT                      | 0.125525 | 0.004812 |
| Monocyte_CIBERSORT                             | 0.103994 | 0.019655 |
| Macrophage M0_CIBERSORT                        | 0.09377  | 0.035515 |
| Macrophage M1_CIBERSORT                        | -0.23424 | 1.07E-07 |
| Macrophage M2_CIBERSORT                        | 0.222494 | 4.63E-07 |
| Myeloid dendritic cell activated_CIBERSORT     | 0.175099 | 7.89E-05 |
| Mast cell resting_CIBERSORT                    | 0.123491 | 0.005548 |
| B cell naive_CIBERSORT-ABS                     | -0.19715 | 8.41E-06 |
| B cell memory_CIBERSORT-ABS                    | -0.43266 | 2.31E-24 |
| B cell plasma_CIBERSORT-ABS                    | -0.35859 | 1.04E-16 |
| T cell CD8+_CIBERSORT-ABS                      | -0.39786 | 1.59E-20 |
| T cell CD4+ memory resting_CIBERSORT-ABS       | -0.37755 | 1.73E-18 |
| T cell CD4+ memory activated_CIBERSORT-ABS     | -0.12242 | 0.005977 |
| T cell follicular helper_CIBERSORT-ABS         | -0.39443 | 3.59E-20 |
| T cell regulatory (Tregs)_CIBERSORT-ABS        | -0.26382 | 1.87E-09 |
| T cell gamma delta_CIBERSORT-ABS               | -0.12249 | 0.005947 |
| NK cell resting_CIBERSORT-ABS                  | 0.110028 | 0.013548 |
| NK cell activated_CIBERSORT-ABS                | -0.27148 | 6.01E-10 |
| Macrophage M1_CIBERSORT-ABS                    | -0.37349 | 4.27E-18 |
| Macrophage M2_CIBERSORT-ABS                    | -0.22728 | 2.57E-07 |
| Myeloid dendritic cell activated_CIBERSORT-ABS | 0.113686 | 0.010722 |
| Mast cell resting_CIBERSORT-ABS                | 0.088957 | 0.046142 |
| B cell_QUANTISEQ                               | -0.58235 | 5.29E-47 |
| Macrophage M2_QUANTISEQ                        | -0.207   | 2.84E-06 |
| T cell CD4+ (non-regulatory)_QUANTISEQ         | 0.097661 | 0.028518 |
| T cell CD8+_QUANTISEQ                          | -0.38636 | 2.36E-19 |
| T cell regulatory (Tregs)_QUANTISEQ            | -0.4022  | 5.57E-21 |
| uncharacterized cell_QUANTISEQ                 | 0.248431 | 1.64E-08 |



|                                        |          |          |
|----------------------------------------|----------|----------|
| T cell_MCPCOUNTER                      | -0.50201 | 1.81E-33 |
| T cell CD8+_MCPCOUNTER                 | -0.37434 | 3.54E-18 |
| cytotoxicity score_MCPCOUNTER          | -0.27295 | 4.81E-10 |
| NK cell_MCPCOUNTER                     | -0.28027 | 1.57E-10 |
| B cell_MCPCOUNTER                      | -0.71852 | 4.88E-81 |
| Monocyte_MCPCOUNTER                    | -0.15291 | 0.000579 |
| Macrophage/Monocyte_MCPCOUNTER         | -0.15291 | 0.000579 |
| Myeloid dendritic cell_MCPCOUNTER      | -0.23215 | 1.40E-07 |
| Myeloid dendritic cell activated_XCELL | -0.42981 | 4.95E-24 |
| B cell_XCELL                           | -0.65135 | 4.73E-62 |
| T cell CD4+ memory_XCELL               | -0.18295 | 3.66E-05 |
| T cell CD4+ naive_XCELL                | -0.39015 | 9.81E-20 |
| T cell CD4+ (non-regulatory)_XCELL     | -0.10644 | 0.016936 |
| T cell CD4+ central memory_XCELL       | -0.10643 | 0.016952 |
| T cell CD4+ effector memory_XCELL      | -0.11748 | 0.008357 |
| T cell CD8+ naive_XCELL                | -0.14511 | 0.0011   |
| T cell CD8+_XCELL                      | -0.46329 | 3.96E-28 |
| T cell CD8+ central memory_XCELL       | -0.48617 | 3.36E-31 |
| T cell CD8+ effector memory_XCELL      | -0.15866 | 0.000354 |
| Class-switched memory B cell_XCELL     | -0.51721 | 9.31E-36 |
| Common lymphoid progenitor_XCELL       | 0.210013 | 2.02E-06 |
| Myeloid dendritic cell_XCELL           | -0.28041 | 1.53E-10 |
| Eosinophil_XCELL                       | -0.08951 | 0.044805 |
| Cancer associated fibroblast_XCELL     | -0.15857 | 0.000357 |
| Hematopoietic stem cell_XCELL          | -0.09028 | 0.042977 |
| Macrophage_XCELL                       | -0.23025 | 1.78E-07 |
| Macrophage M1_XCELL                    | -0.23968 | 5.28E-08 |
| Macrophage M2_XCELL                    | -0.1083  | 0.015094 |
| Mast cell_XCELL                        | -0.18326 | 3.55E-05 |
| B cell memory_XCELL                    | -0.51448 | 2.45E-35 |
| Monocyte_XCELL                         | -0.15199 | 0.000626 |
| B cell naive_XCELL                     | -0.22963 | 1.92E-07 |
| Neutrophil_XCELL                       | 0.14862  | 0.000827 |
| Plasmacytoid dendritic cell_XCELL      | -0.37055 | 8.11E-18 |
| B cell plasma_XCELL                    | -0.50514 | 6.26E-34 |
| immune score_XCELL                     | -0.51066 | 9.34E-35 |
| stroma score_XCELL                     | -0.11654 | 0.008892 |
| microenvironment score_XCELL           | -0.46832 | 8.75E-29 |
| B cell_EPIC                            | -0.7118  | 6.80E-79 |
| T cell CD4+_EPIC                       | -0.19314 | 1.29E-05 |
| Macrophage_EPIC                        | -0.21922 | 6.87E-07 |
| uncharacterized cell_EPIC              | 0.224086 | 3.82E-07 |
